# Supplementary material for: The deubiquitination enzyme USP14 regulates the tumourigenesis of gastric cancer by regulating c-MYC nuclear translocation through deubiquitination KPNA2
Source: Research Square preprint supplement (doi:10.21203/rs.3.rs-6295746/v1), 2025-05-07
Supplement: Supplementary file 1 [file 1⁄2 Microsoft Excel .xlsx]

## Sheet: Sheet1
					Sample Name	Gene Name	Cq	Cq Mean	Cq Error
					HGC-shGFP	GAPDH	31.23	30.85	0.14
					HGC-shGFP	GAPDH	31.17	30.85	0.14
					HGC-shGFP	GAPDH	31.15	30.85	0.14
					HGC-shKPNA2-2	GAPDH	31.98	31.82	0.14
					HGC-shKPNA2-2	GAPDH	31.76	31.82	0.14
					HGC-shKPNA2-2	GAPDH	31.72	31.82	0.14
					HGC-shKPNA2-1	GAPDH	31.57	31.42	0.23
					HGC-shKPNA2-1	GAPDH	31.54	31.42	0.23
					HGC-shKPNA2-1	GAPDH	31.16	31.42	0.23
					HGC-shGFP	KPNA2	26.04	26.03	0.07
					HGC-shGFP	KPNA2	26.09	26.03	0.07
					HGC-shGFP	KPNA2	25.96	26.03	0.07
					HGC-shKPNA2-2	KPNA2	28.86	28.55	0.32
					HGC-shKPNA2-2	KPNA2	28.23	28.55	0.32
					HGC-shKPNA2-2	KPNA2	28.56	28.55	0.32
					HGC-shKPNA2-1	KPNA2	27.27	25.99	0.17
					HGC-shKPNA2-1	KPNA2	27.28	25.99	0.17
					HGC-shKPNA2-1	KPNA2	27.31	25.99	0.17
					SGC-shGFP	GAPDH	28.7	28.88	0.12
					SGC-shGFP	GAPDH	28.79	28.88	0.12
					SGC-shGFP	GAPDH	28.62	28.88	0.12
					SGC-shKPNA2-1	GAPDH	31.16	31.07	0.11
					SGC-shKPNA2-1	GAPDH	31.09	31.07	0.11
					SGC-shKPNA2-1	GAPDH	30.95	31.07	0.11
					SGC-shKPNA2-2	GAPDH	30.91	30.73	0.24
					SGC-shKPNA2-2	GAPDH	30.82	30.73	0.24
					SGC-shKPNA2-2	GAPDH	30.45	30.73	0.24
					SGC-shGFP	KPNA2	30.09	29.83	0.16
					SGC-shGFP	KPNA2	29.83	29.83	0.16
					SGC-shGFP	KPNA2	29.96	29.83	0.16
					SGC-shKPNA2-1	KPNA2	34.34	34.56	0.13
					SGC-shKPNA2-1	KPNA2	34.55	34.56	0.13
					SGC-shKPNA2-1	KPNA2	34.34	34.56	0.13
					SGC-shKPNA2-2	KPNA2	34.65	34.41	0.23
					SGC-shKPNA2-2	KPNA2	34.2	34.41	0.23
					SGC-shKPNA2-2	KPNA2	34.37	34.41	0.23
