# Supplementary material for: The deubiquitination enzyme USP14 regulates the tumourigenesis of gastric cancer by regulating c-MYC nuclear translocation through deubiquitination KPNA2
Source: Research Square preprint supplement (doi:10.21203/rs.3.rs-6295746/v1), 2025-05-07
Supplement: Supplementary file 1 [file LightCycler96_SystemGuides_V1.1.pdf › 定量/LightCycler® 96/Manuals/LightCycler96_SystemGuides_V1.1.pdf]

LightCycler®

## LightCycler® 96 System

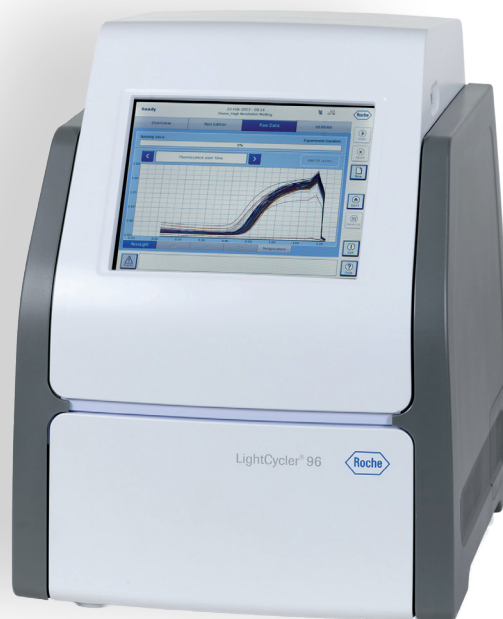

**For life science research only.  
Not for use in diagnostic procedures.**

# How to use the LightCycler<sup>®</sup> 96 System Guides

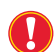

*Before reading, please review the section "Revision" for important information.*

## Quick Guide

Provides a short set of instructions for use in the laboratory, describing the basic handling steps. This shorter form of information is for routine use after you are familiar with the details of the LightCycler<sup>®</sup> 96 System described in the User Training Guide.

## User Training Guide

Provides detailed step-by-step instructions for routine operation using the main applications of the LightCycler<sup>®</sup> 96 System, including instrument startup and shutdown.

## Operator's Guide

Provides a detailed description of the LightCycler<sup>®</sup> 96 System, system components and all relevant software information not covered by the User Training Guide. For installation requirements, always refer to the Operator's Guide.

## Revisions

Provides updates to the LightCycler<sup>®</sup> 96 System Guides, including new supplementary information and corrections to previous editions.

## LightCycler® 96 System Quick Guide: System installation

### Unpack the instrument

The LightCycler® 96 Instrument and the accessories are packaged in a shipping box.

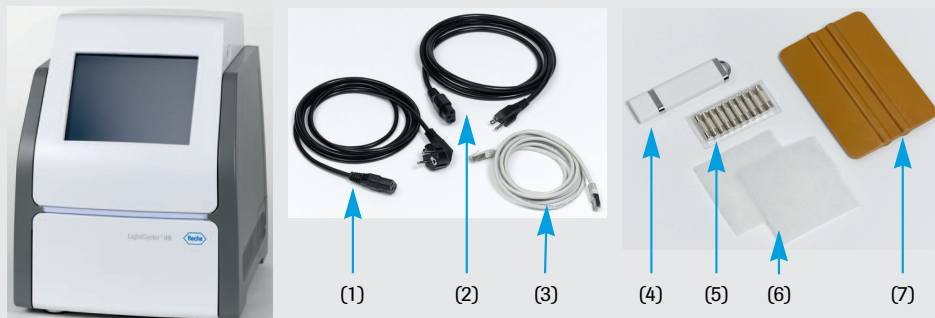

| Number | Quantity | Component                                 |
|--------|----------|-------------------------------------------|
|        | 1        | LightCycler® 96 Instrument                |
| (1)    | 1        | Mains power cable (EU)                    |
| (2)    | 1        | Mains power cable (US)                    |
| (3)    | 1        | Ethernet cable (3 m)                      |
| (4)    | 1        | LightCycler® 96 USB Drive                 |
| (5)    | 1        | Package fuses FUSE 5x20 T8AH 250V ULR/IEC |
| (6)    | 2        | Ventilation dust filters                  |
| (7)    | 1        | Sealing foil applicator                   |

Check for damage that may have occurred during transportation. Report any signs of damage to your local Roche Diagnostics representative.

Keep the shipping box and packaging in case of return. If you have already disposed of the packaging, you can request it from Roche.

For detailed information on assembling the instrument and more detailed pictures, refer to the 'Operator's Guide' on the LightCycler® 96 USB Drive.

For life science research only. Not for use in diagnostic procedures.

- 1 Remove the protective foam on the top and the accessory box located in front of the instrument.
- 2 Lift the LightCycler® 96 Instrument out of the box by holding it on the left and right sides, and place it on a solid level surface.
  - To carry and lift the instrument, only use the recessed grips on the left and right sides of the instrument base plate.
  - Caution: Due to the weight of the instrument, two persons may be needed to lift it.
- 3 Ensure that all components are present and intact.
  - Report any missing items to your local Roche Diagnostics representative.

### Assemble the instrument

- 1 Remove the protective foil from the instrument, and fully loosen the fixation gripper on the back of the instrument. Turn the screw counterclockwise.
- 2 Connect the supplied mains power cable to the mains power socket of the instrument, and then to the wall outlet.
- 3 Optional, when connecting the instrument to an Ethernet network:
  - ▶ Connect one end of the Ethernet cable directly to the Ethernet port of your computer or the Ethernet port of your LAN.
  - ▶ Connect the other end of the Ethernet cable to the Ethernet port on the back of the LightCycler® 96 Instrument.
  - For configuring the instrument using a direct connection or the local Ethernet, refer to the 'Operator's Guide' on the LightCycler® 96 USB Drive.
- 4 Optional: Connect the external handheld barcode scanner to the USB interface on the back of the instrument.

## LightCycler® 96 System Quick Guide: System installation

### Remove the transport locking device

- 1 Switch on the instrument using the mains power switch on the back of the instrument. The initialization process begins.
- 2 When the instrument has successfully initialized, choose the *Eject* button on the touch-screen to release the loading module. The loading module is ejected.
- 3 Manually pull the loading module completely out of the instrument.

- 4  Remove the transport locking device held by an adhesive tape from the mount.  
 *Keep the transport locking device including the adhesive tape in case the instrument has to be transported. Ensure that no residuals of the tape remain on the thermal block cycler unit.*

- 5 Push the loading module in until it starts moving automatically to its home position.

### Install the LightCycler® 96 Application Software

 For installing the LightCycler® 96 Application Software Version 1.1 as an upgrade, refer to the 'Operator's Guide' on the LightCycler® 96 USB Drive.

- 1 Start the computer on which you want to install the software.  
 For a detailed list of the system requirements, refer to the 'Operator's Guide' on the LightCycler® 96 USB Drive.
- 2 Insert the LightCycler® 96 USB Drive into a USB interface on your computer.
- 3 Log on to Microsoft Windows, and ensure that you have the administration rights to install the software.

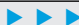

- 4 Navigate to the USB drive, and install the software by double-clicking the *Setup\_LightCycler96\_<release>.exe* file.  
The installation process transfers files, extracts the files, and prepares the installation wizard.

- 5 For the optional connection of the application software and the instrument software (usable for online monitoring and data transfer):
  - ▶ Start the LightCycler® 96 Application Software.
  - ▶ Open the *Instrument Manager*.
  - ▶ Register the instrument with the application software.

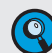

*For registering the instrument and monitoring an instrument run via the network, refer to the 'Operator's Guide' on the LightCycler® 96 USB Drive.*

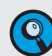

*New software releases and user guides for the LightCycler® 96 Instrument are available in the download area of the Roche Applied Sciences website.*

### Disclaimer

Before setting up operation of the LightCycler® 96 System, it is important to read the user documentation completely. Non-observance of the instructions provided or performing any operations not stated in the user documentation could produce safety hazards.

#### Version Information

Version 2.0, May 2013, Software Version 1.1.

#### Trademarks

LIGHTCYCLER is a trademark of Roche.

© 2012 Roche Diagnostics. All rights reserved.

#### Published by

Roche Diagnostics GmbH  
Sandhofer Straße 116  
68305 Mannheim  
Germany

[www.roche-applied-science.com](http://www.roche-applied-science.com)

For patent license limitations for individual products, please refer to: [www.technical-support.roche.com](http://www.technical-support.roche.com).

## LightCycler® 96 System Quick Guide: Programming and running an experiment

### Workflow

To program and run an experiment, use:

- ▶ LightCycler® 96 Application Software for defining an experiment protocol and analyzing acquired data.
- ▶ LightCycler® 96 Instrument Software for defining an experiment protocol and performing experiments.

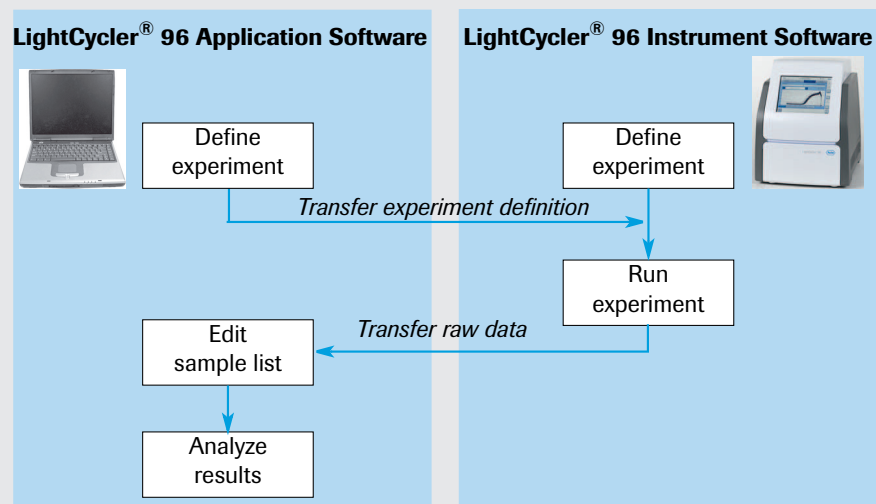

For detailed step-by-step information, refer to the *LightCycler® 96 System User Training Guide* on the LightCycler® 96 USB Drive.

### Set up the reaction mix

- 1 Identify the detection dye to be used in your experiment.
- 2 Prepare the PCR mix and set up the sample dilutions.

When setting up the PCR mix, you should compensate for pipetting losses. It is recommended to prepare PCR mixes with 10% extra volume.

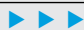

- 3 Pipette the PCR mix and the corresponding sample dilution into each well of the LightCycler® 480 Multiwell Plate 96.
- 4 Seal the multiwell plate with the LightCycler® 480 Sealing Foil using the sealing foil applicator (part of the system package).
- 5 Centrifuge the multiwell plate at 1,500 x *g* for 2 minutes in a standard swing-bucket centrifuge, using a rotor for multiwell plates and suitable adapters.

### Define the experiment

- 1 Create a new experiment using the LightCycler® 96 Application Software or the LightCycler® 96 Instrument Software.
- 2 Open the *Run Editor* tab and define the temperature profile, including the heating and cooling cycles to be used.
- 3 Configure the detection format and the sample volume.
- 4 Save the experiment.

### Run the experiment

- 1 If you have defined the experiment using the LightCycler® 96 Application Software, transfer the experiment file to the LightCycler® 96 Instrument.
  - ▶ If the instrument is connected to an Ethernet network, use the *Instrument Manager* in the application software to send the experiment file to the instrument.
  - ▶ If the instrument is not connected to an Ethernet network, use a USB drive to transfer the experiment file to the instrument. The experiment file has to be saved into a top level *Experiments* folder on the USB drive.
- 2 Insert the LightCycler® 480 Multiwell Plate 96 with the samples into the LightCycler® 96 Instrument.
- 3 On the *Overview* tab on the touchscreen, select the experiment in the list.

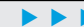

## LightCycler® 96 System Quick Guide: Programming and running an experiment

- 4 In the global action bar on the right, choose the *Start* button.
- 5 View the *Raw Data* tab to monitor the progress of the running experiment.

### Run finished

The end of a run is indicated as follows:

- ▶ The status bar on the touchscreen displays the instrument status *Ready*.
- ▶ The LightCycler® 96 Instrument unlocks the loading module.
- ▶ The experiment progress window area shows the end time of the experiment run.
- ▶ The *Raw Data* tab provides the final raw data.

### Transfer the experiment to the application software

- 1
  - ▶ If the instrument is connected to an Ethernet network, use the *Instrument Manager* in the application software to retrieve the experiment file from the instrument.
  - ▶ If the instrument is not connected to an Ethernet network, use a USB drive to transfer the experiment file to your computer.
- 2 Edit the experiment according to your needs and save the file to your computer.

### Edit the sample list

- 1 Open the *Plate View* tab of the *Sample Editor*.
- 2 Use the *Clear Wells* function to clear the empty wells. This eliminates the selected wells from further analyses.
- 3 Select a well or a range of wells.

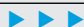

- 4 In the *Reaction Properties* window area to the right of the multiwell plate image, edit the sample-specific properties.  
 *Ensure that the sample assignment on the 'Sample Editor' tab matches the pipetting scheme on the multiwell plate.*

- 5 Save the experiment.

### Analyze the data

- 1 On the *Analysis* tab, add the appropriate analysis type.
- 2 Open the *<analysis> Settings* dialog box and set up the analysis-specific parameters.
- 3 Exclude samples if necessary.
- 4 Select the results to be displayed.
- 5 Optional: Export the result data.

### Disclaimer

Before setting up operation of the LightCycler® 96 System, it is important to read the user documentation completely. Non-observance of the instructions provided or performing any operations not stated in the user documentation could produce safety hazards.

#### Version Information

Version 2.0, May 2013, Software Version 1.1.

#### Trademarks

LIGHTCYCLER is a trademark of Roche.

© 2012 Roche Diagnostics. All rights reserved.

For patent license limitations for individual products, please refer to: [www.technical-support.roche.com](http://www.technical-support.roche.com).

#### Published by

Roche Diagnostics GmbH

Sandhofer Straße 116

68305 Mannheim

Germany

[www.roche-applied-science.com](http://www.roche-applied-science.com)

**LightCycler®**

# **LightCycler® 96 System User Training Guide, Version 2.0**

**Software Version 1.1**

**May 2013**

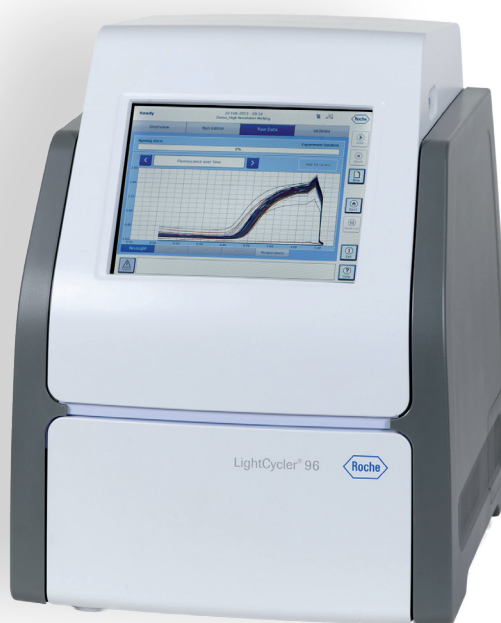

**For life science research only.  
Not for use in diagnostic procedures.**



|             |                                                                                          |           |
|-------------|------------------------------------------------------------------------------------------|-----------|
|             | <b>Prologue</b>                                                                          | <b>7</b>  |
| <b>I</b>    | <b>Revision history</b> .....                                                            | 7         |
| <b>II</b>   | <b>Contact addresses</b> .....                                                           | 7         |
| <b>III</b>  | <b>Trademarks</b> .....                                                                  | 8         |
| <b>IV</b>   | <b>Intended use</b> .....                                                                | 8         |
| <b>V</b>    | <b>Preamble</b> .....                                                                    | 8         |
| <b>VI</b>   | <b>Disclaimer of licenses</b> .....                                                      | 8         |
| <b>VII</b>  | <b>Open Source licenses</b> .....                                                        | 8         |
| <b>VIII</b> | <b>Conventions used in this guide</b> .....                                              | 9         |
| <b>IX</b>   | <b>Warnings and precautions</b> .....                                                    | 12        |
| <b>A</b>    | <b>Starting the system</b>                                                               | <b>15</b> |
| <b>1</b>    | <b>Overview</b> .....                                                                    | 15        |
| <b>2</b>    | <b>Starting the LightCycler® 96 Application Software</b> .....                           | 17        |
| <b>3</b>    | <b>Starting the LightCycler® 96 Instrument</b> .....                                     | 17        |
| <b>B</b>    | <b>Programming and running an experiment</b>                                             | <b>19</b> |
| <b>1</b>    | <b>Programming the experiment with the LightCycler® 96 Application Software</b> .....    | 20        |
| 1.1         | Creating the experiment .....                                                            | 21        |
| 1.2         | Creating the temperature profile .....                                                   | 23        |
| 1.3         | Configuring the reaction volume and detection format .....                               | 27        |
| <b>2</b>    | <b>Transferring the experiment to the instrument</b> .....                               | 30        |
| <b>3</b>    | <b>Programming the experiment with the LightCycler® 96 Instrument Software</b> .....     | 32        |
| 3.1         | Creating the experiment .....                                                            | 32        |
| 3.2         | Creating the temperature profile .....                                                   | 35        |
| 3.3         | Configuring the detection format and reaction volume .....                               | 40        |
| <b>4</b>    | <b>Running the experiment</b> .....                                                      | 43        |
| 4.1         | Starting the run .....                                                                   | 43        |
| 4.2         | Monitoring the run .....                                                                 | 45        |
| <b>5</b>    | <b>Transferring the experiment from the instrument to the application software</b> ..... | 47        |
| <b>6</b>    | <b>Editing the sample list</b> .....                                                     | 50        |
| <b>C</b>    | <b>Main applications</b>                                                                 | <b>57</b> |
| <b>1</b>    | <b>Absolute quantification</b> .....                                                     | 58        |
| 1.1         | Experiment overview .....                                                                | 58        |
| 1.2         | Setting up the samples .....                                                             | 58        |
| 1.3         | Experiment run parameters .....                                                          | 60        |
| 1.4         | Editing the sample data .....                                                            | 62        |
| 1.5         | Analyzing the results .....                                                              | 68        |
| 1.5.1       | Creating the analysis .....                                                              | 68        |
| 1.5.2       | Analysis settings .....                                                                  | 70        |
| 1.5.3       | Amplification curves .....                                                               | 71        |
| 1.5.4       | Standard curve .....                                                                     | 72        |
| 1.5.5       | Heat map .....                                                                           | 73        |
| 1.5.6       | Result table .....                                                                       | 73        |
| 1.5.7       | Cq bars .....                                                                            | 77        |
| 1.6         | Exporting result data .....                                                              | 77        |

|          |                                |     |
|----------|--------------------------------|-----|
| <b>2</b> | <b>Endpoint SNP genotyping</b> | 78  |
| 2.1      | Experiment overview            | 78  |
| 2.2      | Setting up the samples         | 78  |
| 2.3      | Experiment run parameters      | 80  |
| 2.4      | Editing the sample data        | 82  |
| 2.5      | Analyzing the results          | 86  |
| 2.5.1    | Creating the analysis          | 86  |
| 2.5.2    | Analysis settings              | 88  |
| 2.5.3    | Amplification curves           | 89  |
| 2.5.4    | Scatter plot                   | 91  |
| 2.5.5    | Heat map                       | 93  |
| 2.5.6    | Result table                   | 93  |
| 2.6      | Exporting result data          | 97  |
| <b>3</b> | <b>Relative quantification</b> | 98  |
| 3.1      | Experiment overview            | 98  |
| 3.2      | Setting up the samples         | 99  |
| 3.3      | Experiment run parameters      | 102 |
| 3.4      | Editing the sample data        | 104 |
| 3.5      | Analyzing the results          | 109 |
| 3.5.1    | Creating the analysis          | 109 |
| 3.5.2    | Analysis settings              | 111 |
| 3.5.3    | Amplification curves           | 113 |
| 3.5.4    | Ratio bars                     | 113 |
| 3.5.5    | Heat map                       | 117 |
| 3.5.6    | Result table                   | 118 |
| 3.5.7    | Cq bars                        | 118 |
| 3.6      | Exporting result data          | 119 |
| <b>4</b> | <b>Qualitative detection</b>   | 120 |
| 4.1      | Experiment overview            | 120 |
| 4.2      | Setting up the samples         | 120 |
| 4.3      | Experiment run parameters      | 122 |
| 4.4      | Editing the sample data        | 124 |
| 4.5      | Analyzing the results          | 128 |
| 4.5.1    | Creating the analysis          | 128 |
| 4.5.2    | Analysis settings              | 130 |
| 4.5.3    | Amplification curves           | 131 |
| 4.5.4    | Heat map                       | 131 |
| 4.5.5    | Combined call heat map         | 132 |
| 4.5.6    | Result table                   | 133 |
| 4.6      | Exporting result data          | 133 |
| <b>5</b> | <b>T<sub>m</sub> calling</b>   | 134 |
| 5.1      | Experiment overview            | 134 |
| 5.2      | Setting up the samples         | 134 |
| 5.3      | Experiment run parameters      | 136 |
| 5.4      | Editing the sample data        | 138 |
| 5.5      | Analyzing the results          | 141 |
| 5.5.1    | Creating the analysis          | 141 |
| 5.5.2    | Analysis settings              | 143 |
| 5.5.3    | Amplification curves           | 144 |
| 5.5.4    | Melting curves                 | 144 |
| 5.5.5    | Melting peaks                  | 145 |
| 5.5.6    | Heat map                       | 146 |
| 5.5.7    | Result table                   | 146 |
| 5.6      | Exporting result data          | 146 |

|          |                                       |            |
|----------|---------------------------------------|------------|
| <b>6</b> | <b>High resolution melting .....</b>  | <b>147</b> |
| 6.1      | Experiment overview .....             | 147        |
| 6.2      | Setting up the samples .....          | 147        |
| 6.3      | Experiment run parameters .....       | 150        |
| 6.4      | Editing the sample data .....         | 152        |
| 6.5      | Analyzing the results .....           | 155        |
| 6.5.1    | Creating the analysis .....           | 155        |
| 6.5.2    | Analysis settings .....               | 158        |
| 6.5.3    | Melting curves .....                  | 159        |
| 6.5.4    | Normalized melting curves .....       | 161        |
| 6.5.5    | Normalized melting peaks .....        | 163        |
| 6.5.6    | Result table .....                    | 164        |
| 6.5.7    | Difference plot .....                 | 165        |
| 6.5.8    | Heat map .....                        | 168        |
| 6.6      | Exporting result data .....           | 168        |
| <b>D</b> | <b>Shutting down the system .....</b> | <b>169</b> |
| <b>E</b> | <b>Appendix .....</b>                 | <b>173</b> |
| <b>1</b> | <b>Index .....</b>                    | <b>173</b> |

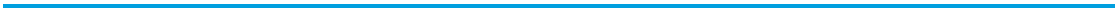

# Prologue

## I Revision history

| User Training Guide Version | Software Version | Revision Date | Changes                                                                                                                                                                                                                                                                                                                                                                     |
|-----------------------------|------------------|---------------|-----------------------------------------------------------------------------------------------------------------------------------------------------------------------------------------------------------------------------------------------------------------------------------------------------------------------------------------------------------------------------|
| V1.0                        | V1.0             | August 2012   | First edition                                                                                                                                                                                                                                                                                                                                                               |
| V2.0                        | V1.1             | May 2013      | <ul style="list-style-type: none"> <li>▶ Chapter C, section "Qualitative detection" added to describe the new qualitative detection software module.</li> <li>▶ Chapter C, section "High resolution melting" added to describe the new high resolution melting software module.</li> <li>▶ Various corrections and improvements to the manual since version 1.0.</li> </ul> |

© Copyright 2012, Roche Diagnostics GmbH. All rights reserved.

Information in this document is subject to change without notice. No part of this document may be reproduced or transmitted in any form or by any means, electronic or mechanical, for any purpose, without the express written permission of Roche Diagnostics GmbH.

Questions or comments regarding the contents of this user training guide can be directed to your local Roche Diagnostics representative.

Every effort has been made to ensure that all the information contained in the LightCycler® 96 System User Training Guide is correct at the time of publishing.

However, Roche Diagnostics GmbH reserves the right to make any changes necessary without notice as part of ongoing product development.

## II Contact addresses

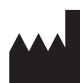

**Manufacturer**  
Roche Diagnostics GmbH  
Sandhofer Straße 116  
68305 Mannheim  
Germany

**Distribution**  
Roche Diagnostics GmbH  
Sandhofer Straße 116  
68305 Mannheim  
Germany

**Distribution in USA**  
Roche Diagnostics  
9115 Hague Road  
PO Box 50457  
Indianapolis, IN 46250  
USA

### III Trademarks

FASTSTART, LC, LIGHTCYCLER, MAGNA PURE, RESOLIGHT and REALTIME READY are trademarks of Roche.

SYBR is a registered trademark of Life Technologies Corporation.

All other product names and trademarks are the property of their respective owners.

### IV Intended use

The LightCycler® 96 Instrument is intended for performing rapid, accurate polymerase chain reaction (PCR) in combination with real-time, online detection of DNA-binding fluorescent dyes or labeled probes, enabling quantification or characterization of a target nucleic acid.

The LightCycler® 96 System is intended for life science research only. It must only be used by laboratory professionals trained in laboratory techniques, who have studied the Instructions for Use of this instrument. The LightCycler® 96 Instrument is not for use in diagnostic procedures.

The LightCycler® 96 System is intended for indoor use only.

### V Preamble

Before setting up operation of the LightCycler® 96 System, it is important to read the user documentation completely. Non-observance of the instructions provided or performing any operations not stated in the user documentation could produce safety hazards.

### VI Disclaimer of licenses

NOTICE: For patent license limitations for individual products please refer to:  
[www.technical-support.roche.com](http://www.technical-support.roche.com).

### VII Open Source licenses

Portions of the LightCycler® 96 Software might include one or more Open Source or commercial software programs. For copyright and other notices and licensing information regarding such software programs included with LightCycler® 96 Software, please refer to the *About* information within the LightCycler® 96 Application Software and the USB drive provided with the product.

## VIII Conventions used in this guide

### Text conventions

To present information consistently and make it easy to read, the following text conventions are used in this guide:

|                  |                                                                                                                                            |
|------------------|--------------------------------------------------------------------------------------------------------------------------------------------|
| Numbered list    | Steps in a procedure that must be performed in the order listed.                                                                           |
| Italic type      | Used for operating instructions for the LightCycler® 96 Software. In addition, important notes and information notes are shown in italics. |
| Blue italic type | Refers to a different section in this User Training Guide, which should be consulted.                                                      |
| [ ]              | Square brackets indicate keys on the keyboard.                                                                                             |
| <>               | Angle brackets indicate variables to be replaced with appropriate values.                                                                  |

### Abbreviations

The following abbreviations are used in this guide:

| Abbreviation | Meaning                                             |
|--------------|-----------------------------------------------------|
| Cq           | Quantification Cycle                                |
| Cy5          | Cyanine 5                                           |
| dsDNA        | Double-stranded DNA                                 |
| E            | Efficiency                                          |
| EPF          | Endpoint Fluorescence                               |
| FAM          | 6-Carboxyl Fluorescein                              |
| GOI          | Gene of Interest                                    |
| HEX          | Carboxyl-2',4,4',5',7,7'-Hexachlorofluorescein      |
| HRM          | High Resolution Melting                             |
| NTC          | No Template Control                                 |
| NRTC         | Non Reverse Transcription Control                   |
| PCR          | Polymerase Chain Reaction                           |
| PE           | Protection Earth                                    |
| qPCR         | Quantitative Real-Time PCR                          |
| RDML         | Real Time Data Management Language                  |
| SNP          | Single Nucleotide Polymorphism                      |
| SYBR         | SYBR Green I (a common double-stranded binding dye) |
| $T_m$        | Melting Temperature                                 |
| USB          | Universal Serial Bus                                |
| VIC          | Reporter Dye for Hydrolysis Probes                  |

**Symbols used in this guide**

| Symbol                                                                              | Meaning                      | Description                                                                                                                                                                                                    |
|-------------------------------------------------------------------------------------|------------------------------|----------------------------------------------------------------------------------------------------------------------------------------------------------------------------------------------------------------|
|    | WARNING                      | This symbol is used to alert you to the presence of important operating and maintenance instructions in the literature accompanying the instrument. There are no user-serviceable parts inside the instrument. |
|    | HOT SURFACE                  | This symbol is used to label potentially hot instrument surfaces.                                                                                                                                              |
|    | BIO HAZARD                   | This symbol is used to indicate that certain precautions must be taken when working with potentially infectious material.                                                                                      |
|    | DANGEROUS ELECTRICAL VOLTAGE | This symbol is used to indicate the danger of personal injury due to dangerous electrical voltage. Refers to an imminent danger that may result in death or serious personal injury.                           |
|    | KEEP HANDS CLEAR             | This symbol is used to indicate the risk of crushing hands in movable parts.                                                                                                                                   |
|    | IMPORTANT NOTE               | Information critical to the success of the procedure or use of the product.                                                                                                                                    |
|    | INFORMATION NOTE             | Additional information about the current topic or procedure.                                                                                                                                                   |
|    |                              | Procedure continued on next page.                                                                                                                                                                              |
|  |                              | End of procedure.                                                                                                                                                                                              |

**Symbols used on the instrument**

| Symbol                                                                             | Meaning                | Description                                                                                                                     |
|------------------------------------------------------------------------------------|------------------------|---------------------------------------------------------------------------------------------------------------------------------|
|   | MANUFACTURER OF DEVICE | Roche Diagnostics GmbH<br>Sandhofer Strasse 116, D-68305 Mannheim Germany<br>Made in Switzerland                                |
|   | CE MARK                | The CE mark on the instrument type plate indicates conformity with requirements of the directives relevant for this instrument. |
|   | WARNING                | On the instrument type plate.                                                                                                   |
|   | cUL MARK               | On the instrument type plate.                                                                                                   |
|   | HOT SURFACE            | On the loading module.                                                                                                          |
|   | BIO HAZARD             | On the loading module.                                                                                                          |
|  | KEEP HANDS CLEAR       | On the instrument housing (Only visible, when the loading unit is ejected).                                                     |

In addition to these symbols, the following information is provided on the instrument typeplate:

- ▶ LightCycler® 96 Instrument
- ▶ Instrument serial number in hexadecimal and in 1D barcode
- ▶ Power supply and mains power consumption: 100-125/200-240 Vac 50/60 Hz 600 VA

## IX Warnings and precautions

 *In an emergency, immediately unplug the instrument.*

The LightCycler® 96 Instrument must only be used by trained and skilled personnel.

It is essential that the following safety information required for installation and operation of the LightCycler® 96 Instrument is carefully read and observed. Please ensure that this safety information is accessible to all personnel working with the LightCycler® 96 Instrument.

### Handling requirements

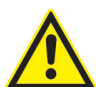

The LightCycler® 96 Instrument is an electromechanical instrument. There is a potential risk to the user from electric shock or physical injury if the instrument is not used according to the instructions given in this manual.

- ▶ Follow all safety instructions printed on or attached to the analytical instrument.
- ▶ Observe all general safety precautions which apply to electrical instruments.
- ▶ Do not access any electrical parts while the LightCycler® 96 Instrument is connected to the mains power supply.
- ▶ Never touch the power cable with wet hands.
- ▶ Never open the housing of the LightCycler® 96 Instrument .
- ▶ Never clean the instrument without disconnecting the power cable.
- ▶ Only authorized service personnel are allowed to perform service or repairs required for this unit.
- ▶ Do not use the network cable outdoors.



- ▶ Always wear safety goggles and gloves when dealing with toxic, caustic, or infectious materials.

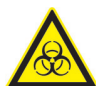

- ▶ Although working with highly purified nucleic acids, for your own safety, please regard all biological material as potentially infectious. Handling and disposal of such material should be performed according to local safety guidelines. Spills should be immediately disinfected with an appropriate disinfectant solution to avoid contamination of laboratory personnel or equipment.
- ▶ For instructions on cleaning the LightCycler® 96 Instrument, refer to the *LightCycler® 96 System Operator's Guide*, chapter *Cleaning and care*.

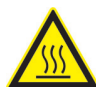

The multiwell plate mount may be hot after an experiment run.

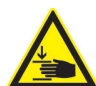

Always keep your hands clear, when closing the loading unit.

## General precautions

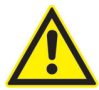

The LightCycler® 96 System contains software that allows it to be connected to a network. Please be aware that such a connection may have an adverse effect on the product's integrity, through, for example, infection with malicious code (viruses, Trojan horses, etc.) or access by unauthorized third parties, such as intrusion by hackers. Roche therefore highly recommends protecting the product against such risks by taking appropriate and state-of-the-art action.

As the product is not intended to be used within networks without an appropriate firewall and has not been designed for such use, Roche assumes no liability in this regard.

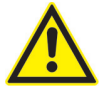

Incorrect positioning of the instrument can cause incorrect results and damage to the equipment. Follow the installation instructions carefully.

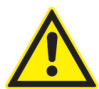

Danger of explosion through sparks. Keep all potentially inflammable or explosive material (for example, anesthetic gas) away from the instrument. Spraying liquid on electrical parts can cause a short circuit and result in fire. Keep the cover closed while the instrument is connected to the mains power supply and do not use sprays in the vicinity of the LightCycler® 96 Instrument. During fire fighting operations, disconnect the LightCycler® 96 Instrument from the mains power supply.

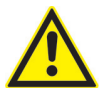

Do not disassemble the instrument.

## Electrical safety

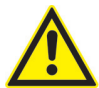

The LightCycler® 96 Instrument is designed in accordance with Protection Class I (IEC). The housing of the instrument is connected to protection earth (PE) by a cable. For protection against electric shock hazards, the instrument must be directly connected to an approved power source such as a three-wire grounded receptacle for the 115/230 V line. Where only an ungrounded receptacle is available, a qualified electrician must replace it with a properly (PE) grounded receptacle in accordance with the local electrical code. No extension must be used.

Any break in the electrical ground path, whether inside or outside the instrument, could create a hazardous condition. Under no circumstances should the operator attempt to modify or deliberately override the safety features of this instrument. If the power cable becomes cracked, frayed, broken, or otherwise damaged, it must be replaced immediately with the equivalent part from Roche Diagnostics.

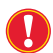

*Please observe the warnings regarding interactions and non-recommended functions. Also bear in mind the potential scope for misuse; it is advisable to draw attention to the possible consequences.*

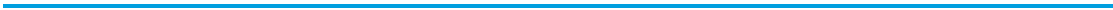

# Starting the system

A

## 1 Overview

This section provides an overview of the following topics:

- ▶ The main components of the LightCycler® 96 System and your workflow for using them, see below.
- ▶ How to use this user training guide, see section [How to use this user training guide](#), on page 16.

### LightCycler® 96 System main components and workflow

The LightCycler® 96 System consists of two main components:

- ▶ The LightCycler® 96 Application Software on your computer, which provides all functions for defining an experiment protocol and for analyzing the data gathered during the experiment run.
- ▶ The LightCycler® 96 Instrument, which is controlled by the LightCycler® 96 Instrument Software. The LightCycler® 96 Instrument Software provides all functions for configuring and controlling the LightCycler® 96 Instrument. These include functions for managing, creating, and executing experiments, and for monitoring an experiment run. The instrument software is operated using the touch-screen of the instrument.

For starting a run, the experiment must be available on the LightCycler® 96 Instrument. After the experiment run, the raw data gathered by the software must be transferred to the application software for analysis.

The figure below shows the LightCycler® 96 System workflow and which software components are used to perform the individual workflow steps.

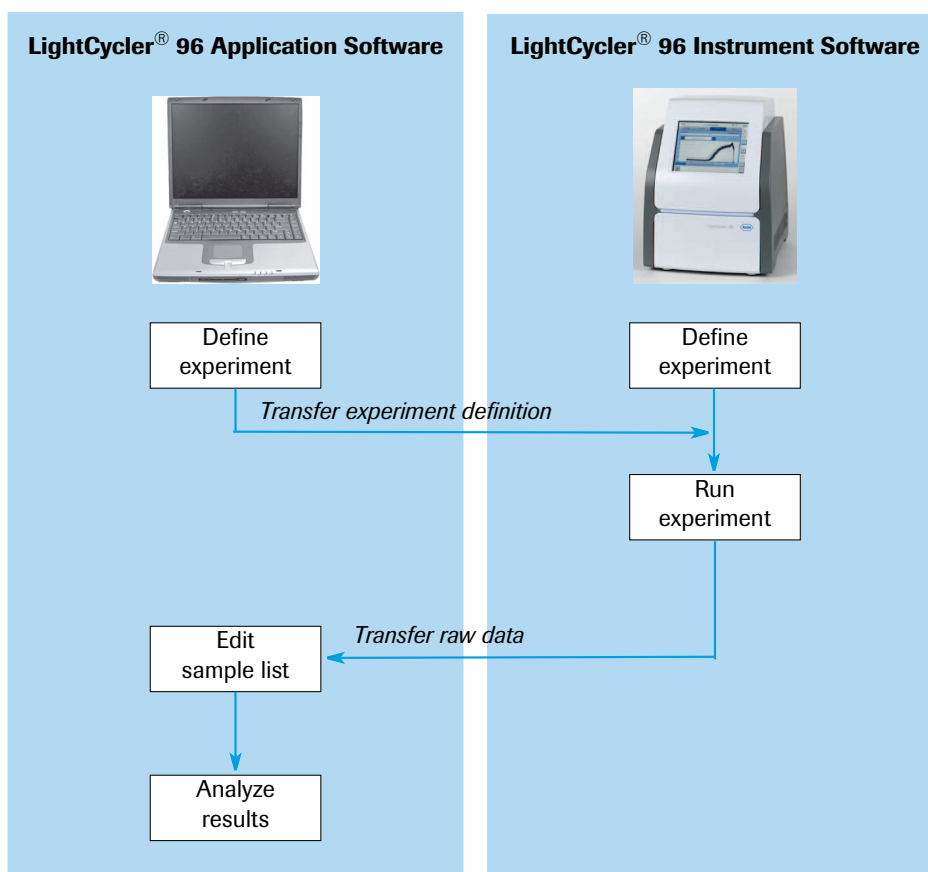

Figure 1: The LightCycler® 96 System workflow

## How to use this user training guide

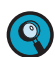

*This user training guide is structured as follows:*

*Steps that are similar for all applications are described step-by-step in the chapter [Programming and running an experiment](#). Read this chapter before starting an experiment.*

*Steps that are different for each application are described in the chapter [Main applications](#), in a separate section for each application.*

To perform experiments with the LightCycler® 96 System, follow the procedure below in the order given. This user training guide describes basic examples for each of the main applications.

- 1 Start the LightCycler® 96 Application Software.  
For step-by-step information, see section [Starting the LightCycler® 96 Application Software](#), on page 17.
  - 2 Start the LightCycler® 96 Instrument and the instrument software.  
For step-by-step information, see section [Starting the LightCycler® 96 Instrument](#), on page 17.
  - 3 Set up the samples.  
For detailed information for each application, see the corresponding section in the chapter [Main applications](#), on page 57.
  - 4 Define the experiment.
    - ▶ For step-by-step information on how to program an experiment, see chapter [Programming and running an experiment](#), on page 19.
    - ▶ For details of the experiment run parameters for each described example, see the corresponding section in chapter [Main applications](#), on page 57.
  - 5 Run the experiment.  
For step-by-step information on how to run an experiment, see chapter [Programming and running an experiment](#), on page 19.
  - 6 Edit the sample list.
    - ▶ For step-by-step information on how to edit a sample list, see chapter [Editing the sample list](#), on page 50.
    - ▶ For detailed information on analysis-specific parameters, see the corresponding section in the chapter [Main applications](#), on page 57.
-  *You can edit the sample list before running the experiment when using the LightCycler® 96 Application Software to define the experiment.*
- 7 Analyze the results.  
For detailed information, see the corresponding section in the chapter [Main applications](#), on page 57.

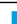

## 2 Starting the LightCycler® 96 Application Software

Before starting the software, you must install it on your computer. For a detailed description of the installation, refer to the *LightCycler® 96 System Operator's Guide*, chapter A, section *Installation*.

### To start the LightCycler® 96 Application Software

- 1 Switch on the computer.
- 2 Double-click the *LightCycler® 96* icon on your desktop.

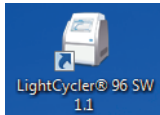

The LightCycler® 96 Application Software provides a splash screen with information on the initialization status. After initialization, the main window opens displaying the startup wizard.

## 3 Starting the LightCycler® 96 Instrument

Before starting, you must plug in the LightCycler® 96 Instrument. Refer to the *LightCycler® 96 System Operator's Guide*, chapter A *System Description* for a detailed description of the instrument parts, and chapter A, section *Installation* for a description of the installation.

The LightCycler® 96 Instrument Software is started together with the instrument.

### To start the LightCycler® 96 Instrument

- 1 Use the mains power switch on the back of the instrument to switch it on.

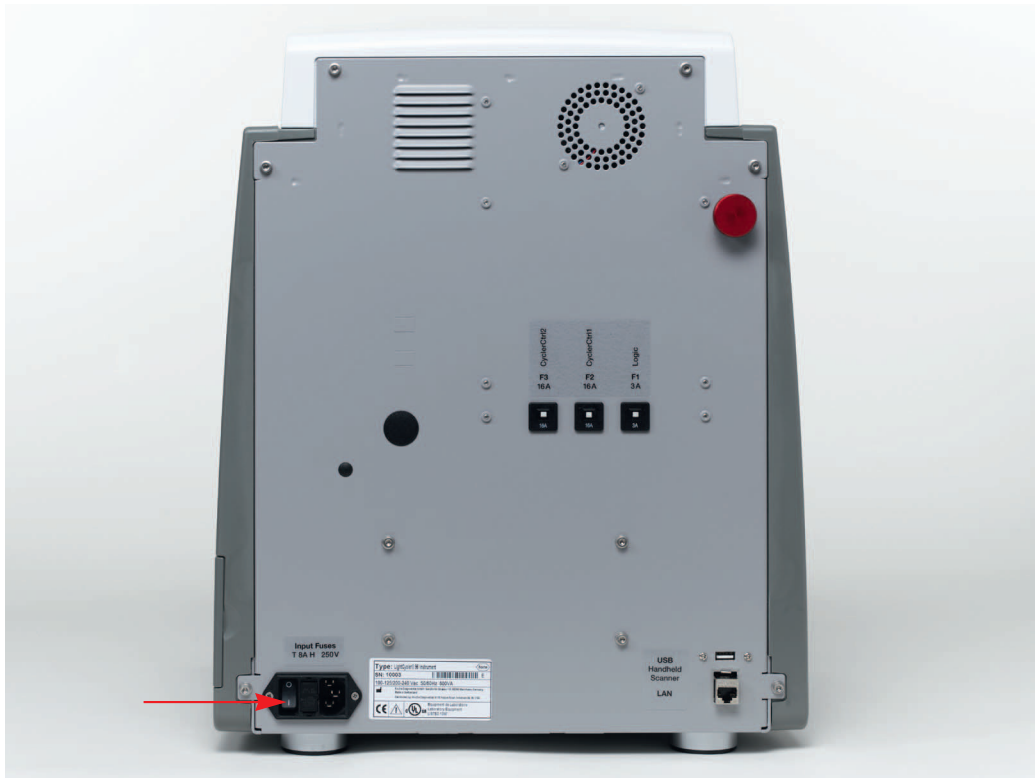

The instrument and the instrument software are started.

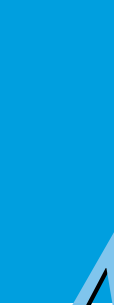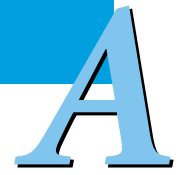

## Programming and running an experiment

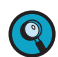

*For information on the order for performing the individual steps of a complete LightCycler® 96 System workflow, see section [Overview](#), on page 15.*

You can create an experiment and define the temperature profile and the dye-specific parameters either on the instrument using the LightCycler® 96 Instrument Software or on a computer using the LightCycler® 96 Application Software. For starting an experiment run, the experiment must be available on the instrument. Therefore, if you have programmed the experiment on a computer, it must be transferred to the instrument for the run.

This chapter describes both ways of programming an experiment:

- ▶ For detailed information on how to specify an experiment definition using the application software, see section [Programming the experiment with the LightCycler® 96 Application Software](#), on page 20. For detailed information on how to transfer the experiment to the instrument, see section [Transferring the experiment to the instrument](#), on page 30.
- ▶ For detailed information on how to specify an experiment definition using the instrument software, see section [Programming the experiment with the LightCycler® 96 Instrument Software](#), on page 32.

After the experiment run, the raw data gathered by the software on the instrument must be transferred back to the application software for analysis. For detailed information on how to transfer the raw data to the application software, see section [Transferring the experiment from the instrument to the application software](#), on page 47.

# B

# 1 Programming the experiment with the LightCycler® 96 Application Software

The information provided in the experiment definition controls the LightCycler® 96 Instrument during an experiment run. The experiment definition specifies the target temperatures and hold times of the thermal block cycler, the number of cycles being executed, and other parameters.

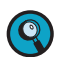

*For a comprehensive description of the LightCycler® 96 Application Software, refer to the LightCycler® 96 System Operator's Guide, chapter LightCycler® 96 Application Software.*

To program an experiment:

- ▶ Create a new experiment, see section [Creating the experiment](#), below.
- ▶ Add one or more programs and define the temperature profile for each step of a program, see section [Creating the temperature profile](#), on page 23.
- ▶ Specify the reaction volume and the detection format for the experiment, see section [Configuring the reaction volume and detection format](#), on page 27.

B

## 1.1 Creating the experiment

This user training guide describes how to generate a completely new experiment. For a detailed description of all options for creating an experiment with the LightCycler® 96 Application Software, refer to the *LightCycler® 96 System Operator's Guide*, chapter B, section *Experiments*.

- 1 Perform one of the following steps:
  - In the startup wizard, choose *Create New Experiment*.

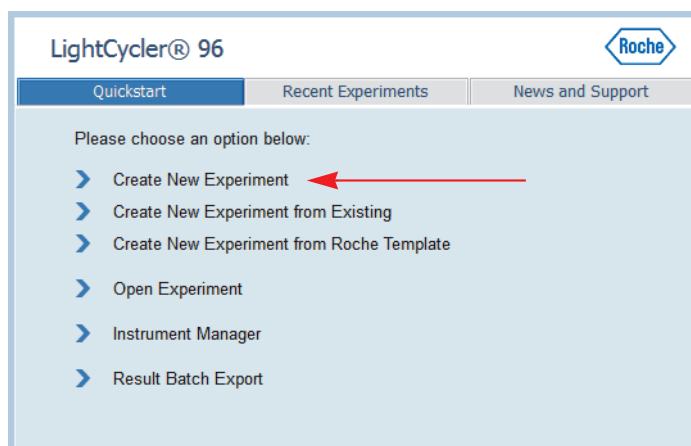

- In the tool bar, choose the *New Experiment* icon.

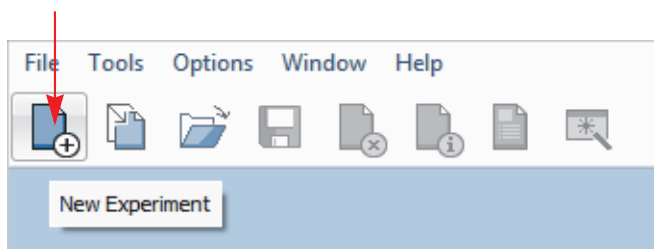

The LightCycler® 96 Application Software displays the new experiment in the main window. The new experiment has the default name *New Experiment <creation\_date> <creation\_time>*.

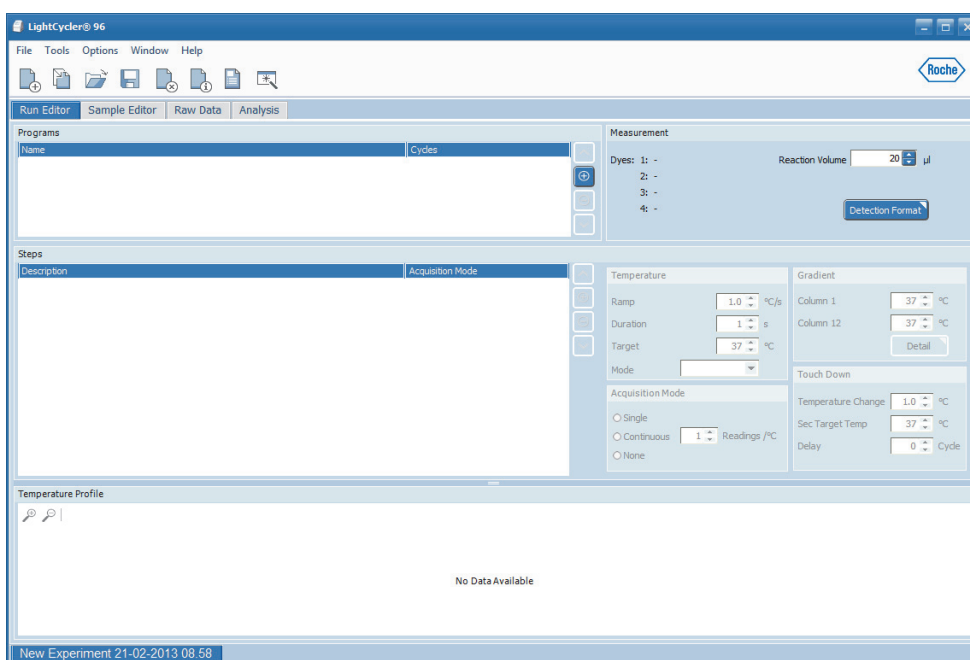

- 2 Optional: Enter a description for the experiment.
  - ▶ In the *File* menu, choose *Properties*.
  - ▶ In the *Properties* dialog box, open the *Notes* tab.

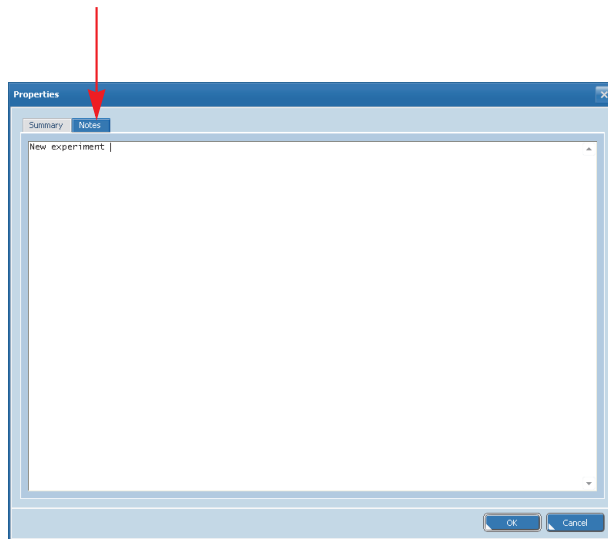

- ▶ Enter a description.
- ▶ Choose *OK*.

B

## 1.2 Creating the temperature profile

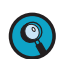

For detailed information on the applicable values for the experiment run parameters, see the corresponding section in the chapter [Main applications](#), on page 57.

To create a temperature profile:

- ▶ Add one or more new programs to the temperature profile and create the cycling sequence, see section [To add a new program and specify the number of cycles](#), below.
- ▶ Define the temperature profile for each step of a program, see section [To specify the temperature profile for each step of a program](#), on page 25.

### To add a new program and specify the number of cycles

- 1 Open the *Run Editor* tab.
- 2 In the *Programs* window area, choose the  button to open the *Predefined Programs* dialog box.

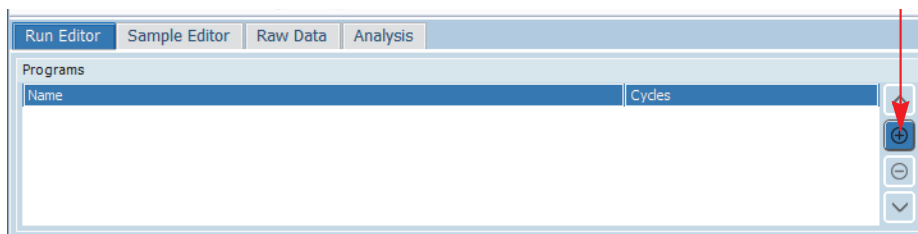

- 3 Select one of the available programs for the first program and choose *Add*.

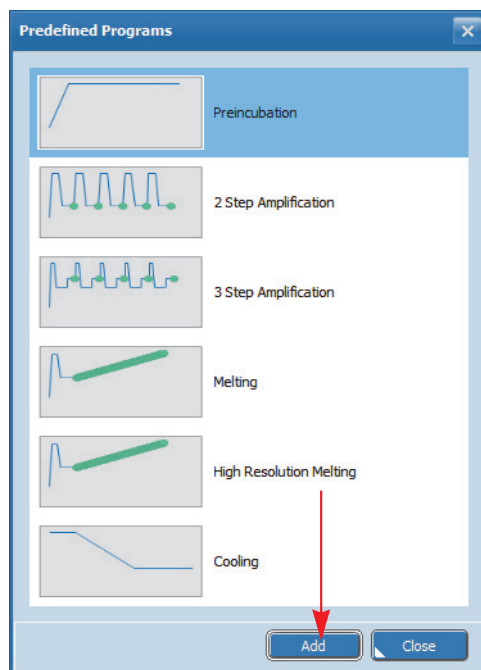

The program is added to the *Programs* list and displayed in the *Temperature Profile* window area.

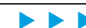

- 4 Optional: To modify the name of the new program, proceed as follows:

► In the *Programs* list, select the new program.

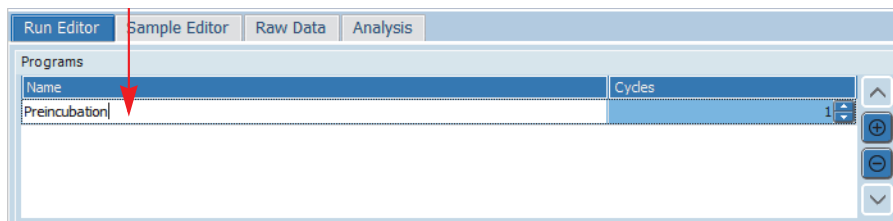

► Specify the name.

- 5 Repeat steps 1 to 4 to add further programs to your profile.

- 6 If necessary (for example, for an amplification program) proceed as follows to specify the number of repeats of a program (cycles):

► In the *Programs* list, select the new program.  
 ► In the *Cycles* column, use the up and down arrows to specify how many times the cycle is to be repeated in this experiment, or type in a value (possible values: 1 to 99).

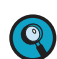

For detailed information on the applicable values for the number of cycles, see the corresponding section in the chapter [Main applications](#), on page 57.

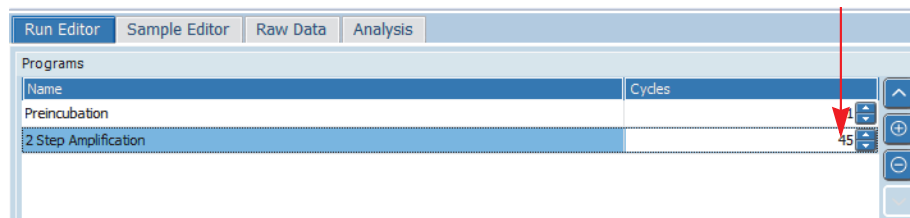

- 7 If necessary repeat step 6 to specify the corresponding number of cycles for further programs.

**To specify the temperature profile for each step of a program**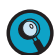

A step can only be edited as long as no run has been performed.

For a comprehensive description of all options of the LightCycler® 96 Application Software, refer to the LightCycler® 96 System Operator's Guide, chapter LightCycler® 96 Application Software.

**1**

► In the *Steps* window area, select the step you want to edit.

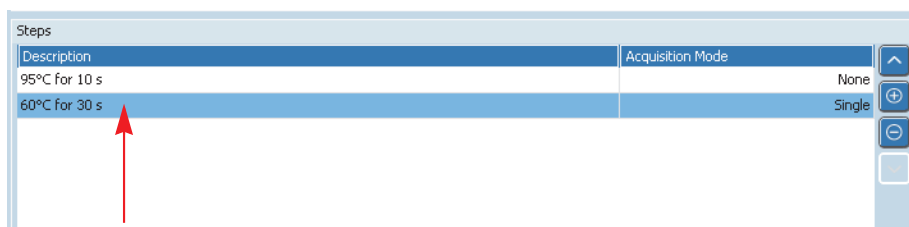**2**

In the *Temperature* window area to the right of the *Steps* list, edit the default values of the following parameters for the selected step:

- *Ramp* (°C/s):  
Maximum value for heating: 4.4°C/s  
Maximum value for cooling: 2.2°C/s
- *Duration* (s):  
Possible values: 1 to 7200 s (= 2 h)
- *Target* (°C):  
Possible values: 37 to 98°C
- *Mode*:  
Possible options:  
*Standard*: For detailed information on the corresponding options in the *Acquisition Mode* window area, see step 3.  
*Gradient*, *Touch down*: For detailed information on these modes and the corresponding parameters, refer to the LightCycler® 96 System Operator's Guide, chapter LightCycler® 96 Application Software.

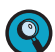

For detailed information on the applicable values for the experiment run parameters, see the corresponding section in the chapter [Main applications](#), on page 57.

| Temperature |          |
|-------------|----------|
| Ramp        | 2.2 °C/s |
| Duration    | 30 s     |
| Target      | 60 °C    |
| Mode        | Standard |

| Gradient  |      |
|-----------|------|
| Column 1  | 0 °C |
| Column 12 | 0 °C |

| Touch Down         |         |
|--------------------|---------|
| Temperature Change | 1 °C    |
| Sec Target Temp    | 0 °C    |
| Delay              | 0 Cycle |

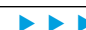

- 3 In the *Acquisition Mode* window area to the right of the *Steps* list, choose one of the following options as the acquisition mode for the selected step.

- ▶ *Single*: Applicable for amplification program steps (one measurement/cycle).
- ▶ *Continuous (Readings/°C)*: Applicable for melting program steps. You must also specify the number of optical acquisitions to be performed.  
Default value: 5 readings/°C  
Possible values: 1 to 25 readings/°C
- ▶ *None*: Applicable for steps that do not require fluorescence measurement.

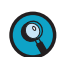

For detailed information on the applicable values for the experiment run parameters, see the corresponding section in the chapter [Main applications](#), on page 57.

- 4 Repeat steps 1 to 3 for each step of each program in your profile.

- 5 View the *Temperature Profile* window area for a graphical representation of the entire experimental protocol you have defined.

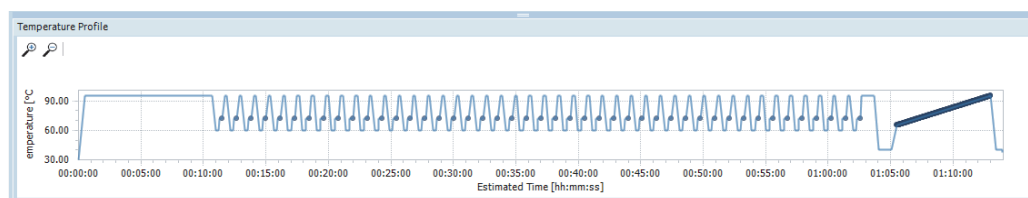

### 1.3 Configuring the reaction volume and detection format

To complete the run definition:

- ▶ Specify the reaction volume, see section [To specify the reaction volume for the experiment](#), below.
- ▶ Specify the dye-specific parameters for the detection format, see section [To specify the detection format for the experiment](#), below.
- ▶ Save the experiment, see section [To save the experiment](#), on page 29.

#### To specify the reaction volume for the experiment

- 1 In the *Measurement* window area to the right of the *Programs* list, specify the reaction volume to be used in your experiment in the *Reaction Volume* field. The LightCycler® 96 Instrument supports reaction volumes from 10 to 50 µl.

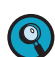

*The LightCycler® 96 Application Software supports a reaction volume from 5 to 50 µl. However, the recommended minimal volume is 10 µl, because smaller volumes may result in reduced data quality.*

*For detailed information on the applicable value for the reaction volume, see the corresponding section in the chapter [Main applications](#), on page 57.*

*As the LightCycler® 96 Instrument does not validate the reaction volume, ensure that the specified reaction volume matches the volume pipetted into the wells of the multiwell plate.*

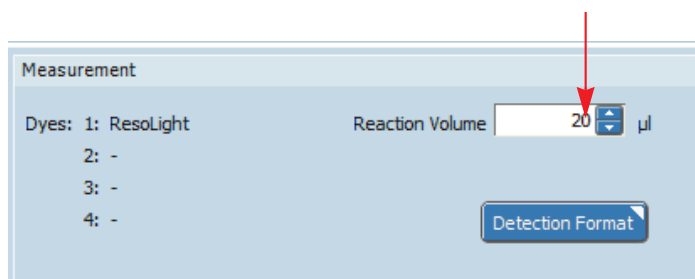

#### To specify the detection format for the experiment

The detection format specifies one or more excitation-emission filter combinations (detection channels) suitable for your experiment.

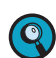

*For detailed information on the applicable values for the dye-specific parameters for specifying the detection format, see the corresponding section in the chapter [Main applications](#), on page 57.*

*For a comprehensive description of all options of the LightCycler® 96 Application Software, refer to the LightCycler® 96 System Operator's Guide, chapter LightCycler® 96 Application Software.*

- 1 In the *Measurement* window area, choose *Detection Format*.

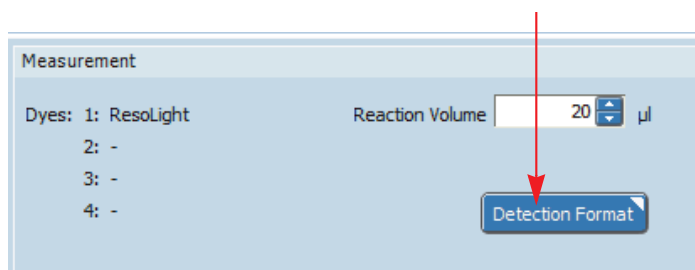

The *Detection Format* dialog box opens.

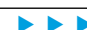

- 2 ▶ In the *Selected* column, select the check box of no more than one dye per detection channel, to specify that the corresponding channel is to be used.

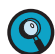

*Only one dye can be selected per channel. The software automatically deselects a check box if you try to select more than one dye in the same channel group.*

The screenshot shows the 'Detection Format' dialog box with four channels. Each channel has a table with columns: Selected, Dye, Quant Factor, and Melt Factor. Channel 1 (470/514) lists SYBR Green I, ResoLight, and FAM. Channel 2 (533/572) lists VIC, Hex, and Yellow555. Channel 3 (577/620) lists Red610 and Texas Red. Channel 4 (645/697) lists Cy5. The 'Selected' checkbox for SYBR Green I in Channel 1 is highlighted with a red arrow.

| Channel            | Wavelength (nm) | Dye          | Quant Factor | Melt Factor |
|--------------------|-----------------|--------------|--------------|-------------|
| Channel 1, 470/514 |                 | SYBR Green I | 20.00        | 1.20        |
|                    |                 | ResoLight    | 20.00        | 1.20        |
|                    |                 | FAM          | 10.00        | 1.20        |
| Channel 2, 533/572 |                 | VIC          | 10.00        | 1.20        |
|                    |                 | Hex          | 10.00        | 1.20        |
|                    |                 | Yellow555    | 10.00        | 1.20        |
| Channel 3, 577/620 |                 | Red610       | 10.00        | 1.20        |
|                    |                 | Texas Red    | 10.00        | 1.20        |
| Channel 4, 645/697 |                 | Cy5          | 10.00        | 1.20        |

Integration Time: ☒ Dynamic ☐ Manual

Buttons: OK, Cancel

- ▶ For *Integration Time*, leave the default value (*Dynamic*).
- ▶ For *Quant Factor* and *Melt Factor*, leave the default values.

- 3 ▶ Optional: Repeat step 2 to specify another detection channel for your detection format.

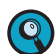

*You cannot combine SYBR Green I or the ResoLight dye with any dye of any other channel.*

- 4 Choose *OK* to apply your settings to the corresponding parameters.

**To save the experiment**

- 1 Optional: Change the default directory for saving and loading experiment files.
  - ▶ In the *Options* menu, choose *Preferences*. The *Preferences* dialog box opens.

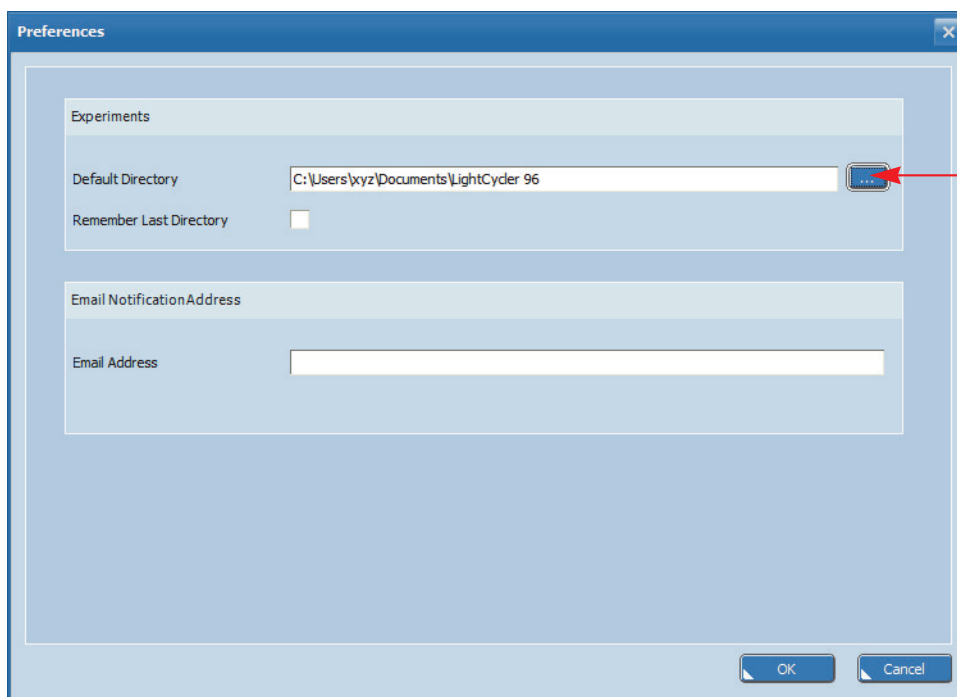

- ▶ Choose the browse button next to the *Default Directory* field. The *Browse For Folder* dialog box opens.
- ▶ Specify a different default path, if applicable.
- ▶ Choose *OK*.

- 2 In the tool bar, choose the *Save Experiment* icon to save the new experiment. The *Save As* dialog box opens.

For a detailed description of all saving options, refer to the *LightCycler® 96 System Operator's Guide*, chapter *LightCycler® 96 Application Software*.

- 3 Navigate to the directory where you want to store the experiment file.

- 4 Enter a file name for the experiment.

- 5 Choose *Save*. The dialog box closes.

The experiment is saved, depending on the processing status:

- ▶ As a LightCycler® 96 file for an unprocessed experiment (\*.lc96u).
- ▶ As a LightCycler® 96 file for a processed experiment (\*.lc96p).

B

## 2 Transferring the experiment to the instrument

If you have specified the experiment definition on a computer using the LightCycler® 96 Application Software, the experiment must be transferred to the instrument for the run.

### To transfer the experiment to the instrument using a USB drive

- 1 Insert a USB drive into one of the USB interfaces of your computer.
- 2 Open Windows Explorer and navigate to the experiment file.
- 3 Copy the experiment file (\*.lc96u) and paste it into the *Experiments* folder on the USB drive.  
 *Only experiment files that are located inside the top level 'Experiments' folder will be recognized by the instrument software. If you use a USB drive other than the one supplied with the instrument, first create the top level 'Experiments' folder and then copy and paste in the experiment file.*
- 4 Close Windows Explorer.
- 5 Remove the USB drive from your computer.
- 6 Switch on the LightCycler® 96 Instrument, see section [Starting the LightCycler® 96 Instrument](#), on page 17.

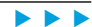

# B

- 7 Insert the USB drive into the USB interface on the right side of the instrument.

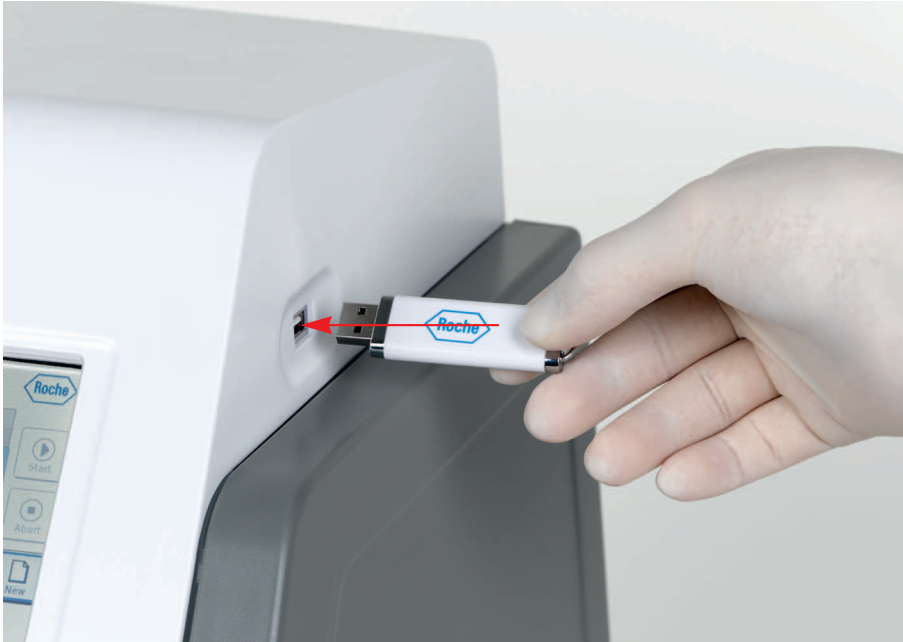

As soon as the USB icon  is shown in the status bar of the LightCycler® 96 Instrument Software, the experiment file is added to the experiments table on the *Overview* tab.

In the corresponding *Storage* column, the USB icon  is shown.

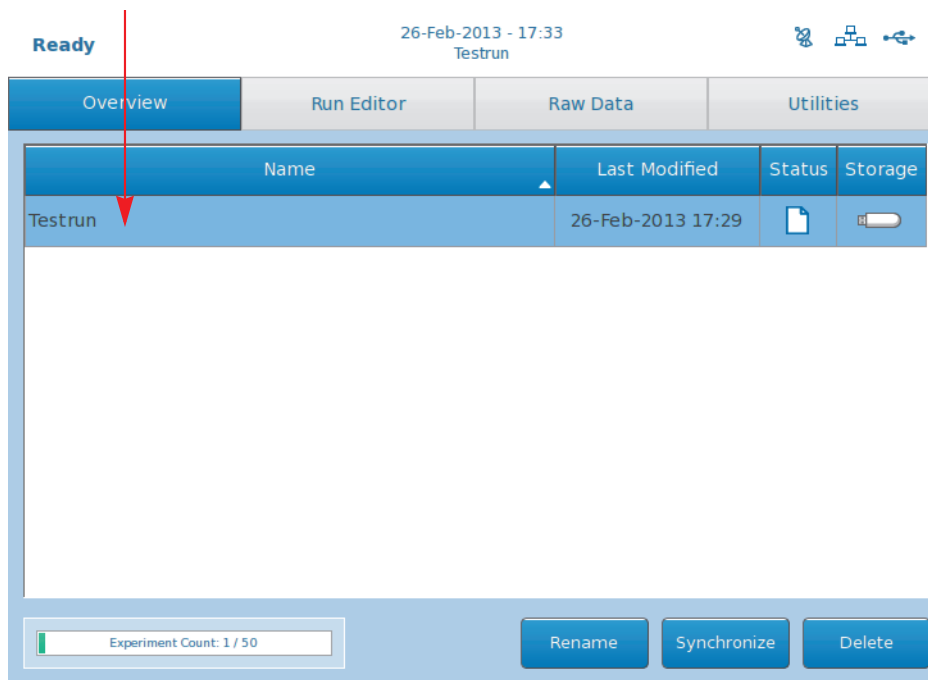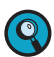

*As long as you have not synchronized the storage locations, the experiment file is located only on the USB drive.*

*It is not necessary to synchronize the experiment to the instrument with the 'Sync Selected' button. Experiments can be run directly from the USB drive and when successfully finished are automatically saved back to the USB drive.*

### 3 Programming the experiment with the LightCycler® 96 Instrument Software

The information provided in the experiment definition controls the LightCycler® 96 Instrument during an experiment run. The experiment definition specifies the target temperatures and hold times of the thermal block cycler, the number of cycles being executed, and other parameters.

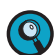

For programming the experiment with the instrument software, the LightCycler® 96 Instrument must be started.

For a comprehensive description of the LightCycler® 96 Instrument Software, refer to the LightCycler® 96 System Operator's Guide, chapter LightCycler® 96 Instrument Software.

In addition, the help browser provides information on the currently open tab of the LightCycler® 96 Instrument Software.

To program an experiment:

- ▶ Create a new experiment, see section [Creating the experiment](#), below.
- ▶ Add one or more programs and define the temperature profile for each step of a program, see section [Creating the temperature profile](#), on page 35.
- ▶ Specify the reaction volume and the detection format for the experiment, see section [Configuring the detection format and reaction volume](#), on page 40.

#### 3.1 Creating the experiment

This user training guide describes how to generate a completely new experiment. For a detailed description of all options for creating an experiment with the LightCycler® 96 Instrument Software, refer to the LightCycler® 96 System Operator's Guide, chapter C, section *Experiments*.

- 1 In the global action bar of the instrument software main window, choose *New*.

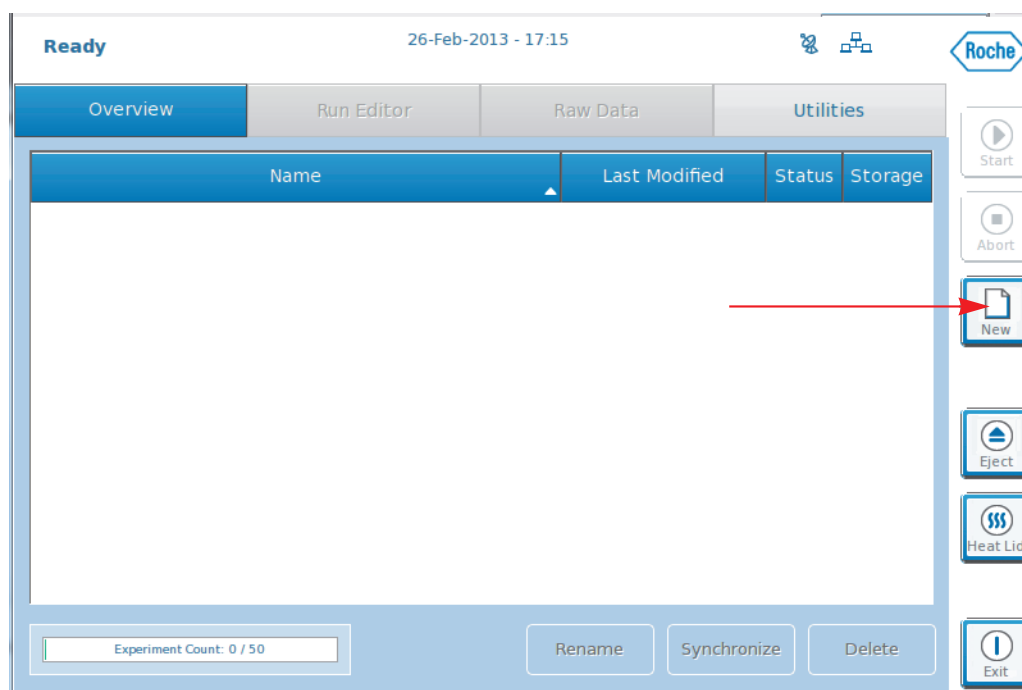

The *Create New Experiment* window area opens.

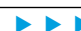

- 2 Choose *New empty experiment* to create a new, empty experiment.  
The new experiment has the default name *New\_Experiment*.

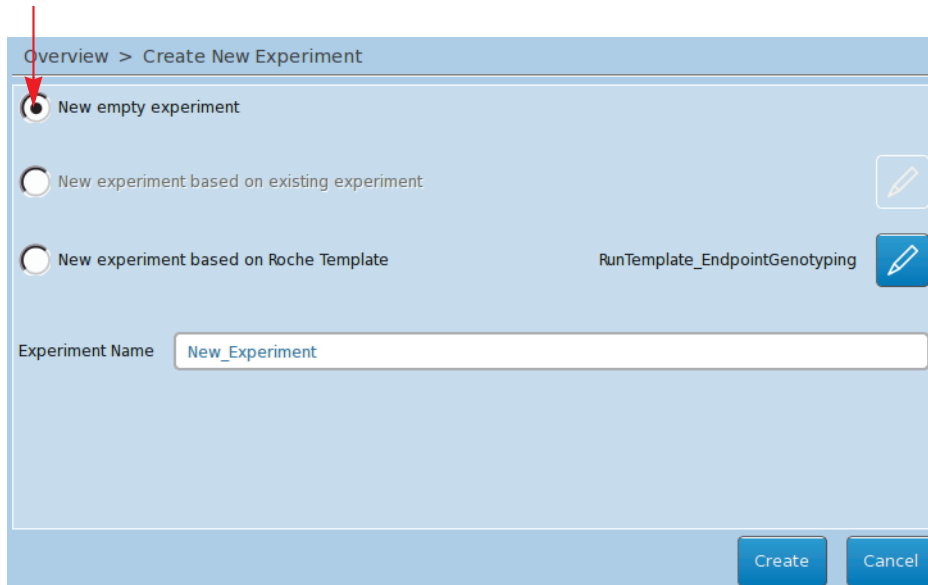

Overview > Create New Experiment

☒ New empty experiment

☐ New experiment based on existing experiment

☐ New experiment based on Roche Template RunTemplate\_EndpointGenotyping

Experiment Name New\_Experiment

Create Cancel

- 3 Choose the *Experiment Name* field.

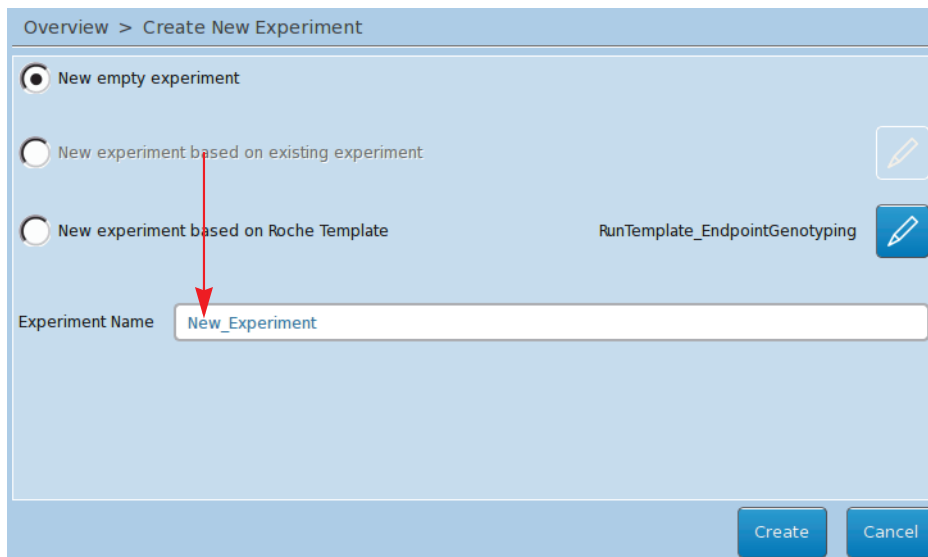

Overview > Create New Experiment

☒ New empty experiment

☐ New experiment based on existing experiment

☐ New experiment based on Roche Template RunTemplate\_EndpointGenotyping

Experiment Name New\_Experiment

Create Cancel

A keyboard dialog box opens.

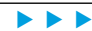

- 4 In the *New Experiment Name* field, specify the name for the new experiment using the keys, and close the dialog box with *OK*.

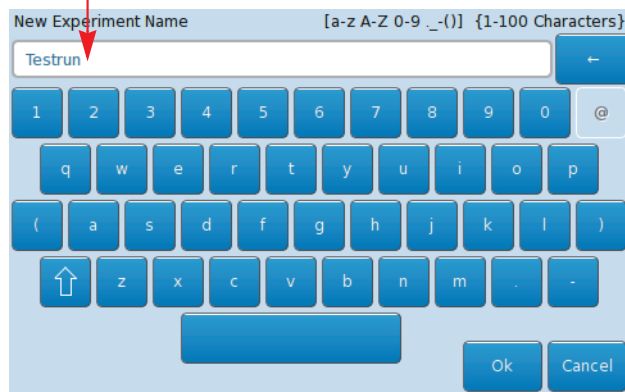

- 5 In the *Create New Experiment* window area, choose *Create*.  
The LightCycler® 96 Instrument Software performs the following steps:
- ▶ It adds the new experiment to the list in the *Overview* tab.
  - ▶ It opens the *Run Editor* tab for the new experiment.

B

## 3.2 Creating the temperature profile

For detailed information on the applicable values for the experiment run parameters, see the corresponding section in the chapter [Main applications](#), on page 57.

You can only edit a program, and thus also a profile, as long as no run has been performed.

To create a temperature profile:

- ▶ Add one or more new programs to the temperature profile and specify the cycling sequence, see section [To add a new program and specify the number of cycles](#), below.
- ▶ Define the temperature profile for each step of a program, see section [To specify the temperature profile for each step of a program](#), on page 37.

### To add a new program and specify the number of cycles

- 1 Open the *Run Editor* tab.
- 2 On the *Profile* tab, choose the  button to open the *Add New Program* window area.

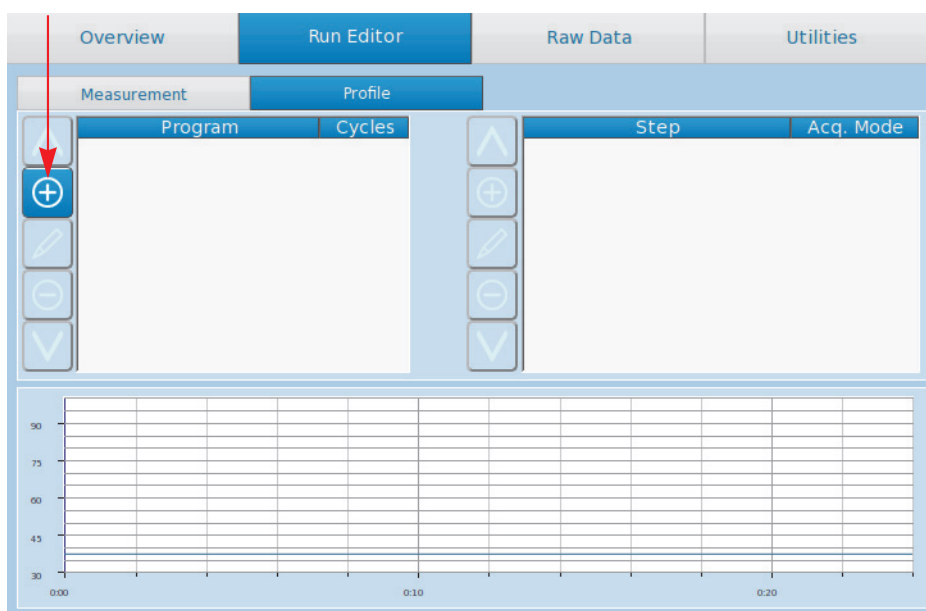

- 3 Select one of the available programs and choose *Add*.

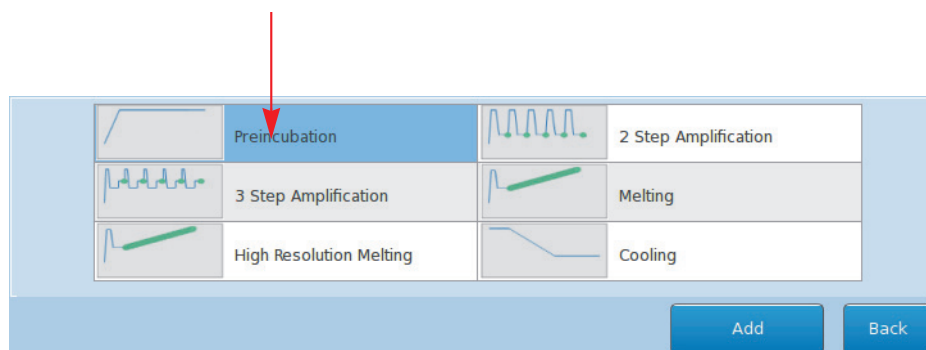

The program is added to the program list on the *Profile* tab.

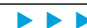

- 4 In the program list, choose the new program. Then choose the pencil button.

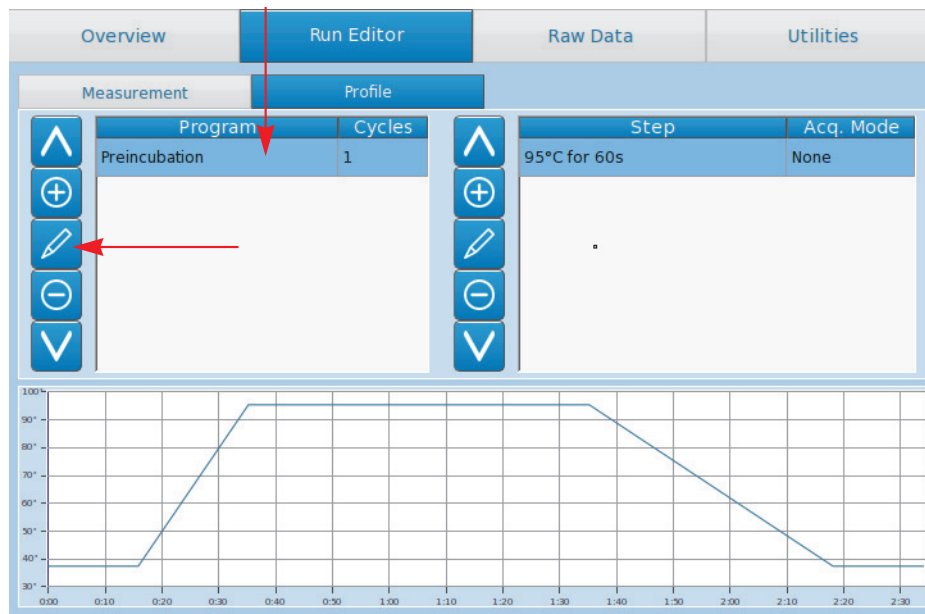

The *Program Settings* window area opens.

- 5 Optional: In the *Name* field, specify the name for the selected program.

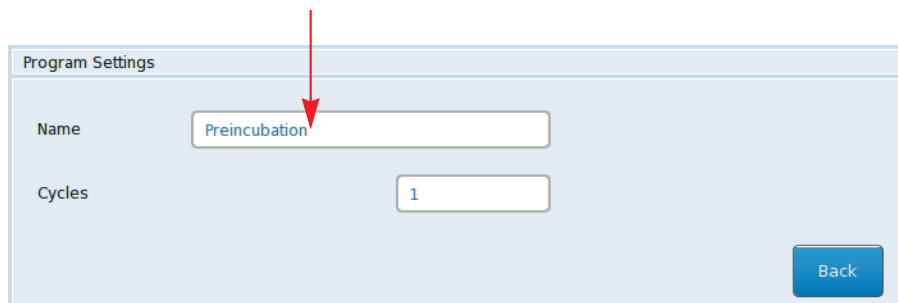

- 6 If necessary (for example, for an amplification program) specify the number of repeats of the selected program (cycles).  
Possible values: 1 to 99

 For detailed information on the applicable values for the number of cycles, see the corresponding section in the chapter [Main applications](#), on page 57.

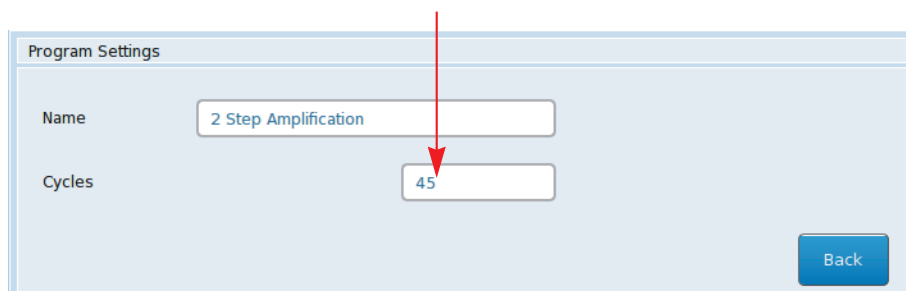

- 7 Choose *Back* to apply your settings to the selected program.  
The *Program Settings* window area is closed. The program list is displayed with the changed settings.
- 8 Optional: Repeat steps 1 to 7 to add further programs to your profile and specify the corresponding number of cycles if necessary.

B

**To specify the temperature profile for each step of a program**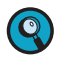

*A step can only be edited as long as no run has been performed.*

*For a comprehensive description of all options of the LightCycler® 96 Instrument Software, refer to the LightCycler® 96 System Operator's Guide, chapter LightCycler® 96 Instrument Software.*

- 1 In the step list, select a step and choose the pencil button.

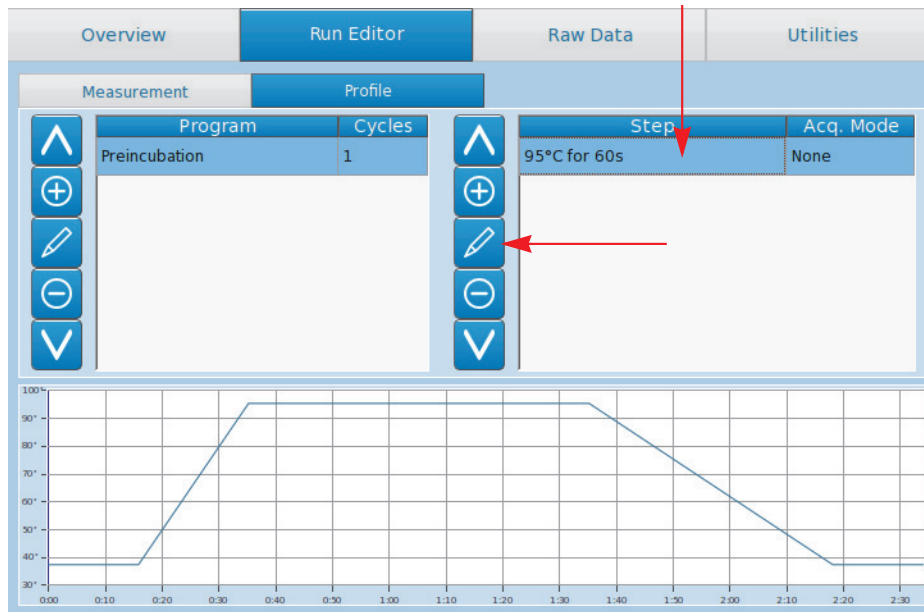

The Step Settings window area opens.

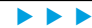

- 2 In the *Temperature* window area, choose the corresponding field one after the other to specify the default values of the following parameters for the selected step:

- ▶ *Ramp (°C/s)*:  
Maximum value for heating: 4.4°C/s  
Maximum value for cooling: 2.2°C/s
- ▶ *Duration (s)*:  
Possible values: 1 to 7200 s (=2 h)
- ▶ *Target (°C)*:  
Possible values: 37 to 98°C
- ▶ For the steps of an amplification program: For *Mode*, leave the default option (*Standard*).

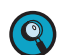

For detailed information on the applicable values for the experiment run parameters, see the corresponding section in the chapter [Main applications](#), on page 57.

To specify the listed parameters, proceed as follows for each parameter of the selected step:

- ▶ Choose the field for each parameter. The corresponding dialog box opens.

- ▶ In the dialog box, choose the relevant number buttons to specify the applicable value.
- ▶ Choose *OK* to apply your setting to the parameter.

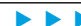

B

- 3 In the *Acquisition Mode* window area, choose one of the following options for the selected step.
- ▶ *Single*: Applicable for amplification program steps (one measurement/cycle).
  - ▶ *Continuous (Readings/°C)*: Applicable for melting program steps. Also enter in the field the number of optical acquisitions to be performed in the corresponding list.  
Default value: 5 Readings/°C  
Possible values: 1 to 25 Readings/°C
  - ▶ *None*: Applicable for steps that do not require fluorescence measurement.
-  For detailed information on the applicable values for the experiment run parameters, see the corresponding section in the chapter [Main applications](#), on page 57.

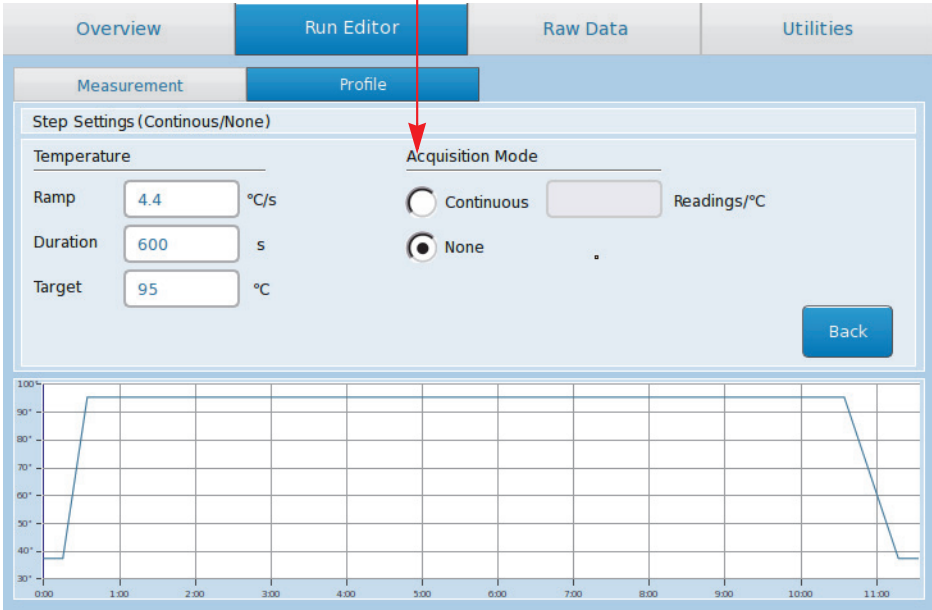

The screenshot shows the 'Run Editor' window with the 'Profile' tab selected. Under 'Step Settings (Continuous/None)', the 'Acquisition Mode' is set to 'None'. The 'Temperature' section shows 'Ramp' at 4.4 °C/s, 'Duration' at 600 s, and 'Target' at 95 °C. A 'Back' button is visible. Below the settings is a graph showing a temperature profile with a ramp up to 95 °C, a hold, and a ramp down.

- 4 Choose *Back* to apply your settings to the corresponding parameters.
- 5 Optional: Repeat steps 1 to 4 for each step of each program in your profile.
- 6 View the temperature profile area for a graphical representation of the entire experimental protocol you have defined.

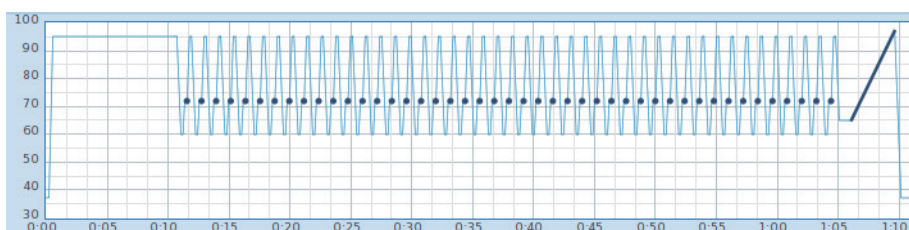

### 3.3 Configuring the detection format and reaction volume

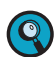

You cannot change or customize the detection format definition after the run has started.

To complete the run definition:

- ▶ Specify the dye-specific parameters for the detection format, see section [To specify the detection format for the experiment](#), below.
- ▶ Specify the reaction volume, see section [To specify the reaction volume for the experiment](#), on page 42.

The LightCycler® 96 Instrument Software automatically saves all changes in the experiment file on the instrument.

#### To specify the detection format for the experiment

The detection format specifies one or more excitation-emission filter combinations (detection channels) suitable for your experiment.

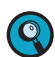

For detailed information on the applicable values for the detection format, see the corresponding section in the chapter [Main applications](#), on page 57.

For a comprehensive description of all options of the LightCycler® 96 Instrument Software, refer to the LightCycler® 96 System Operator's Guide, chapter LightCycler® 96 Instrument Software.

- 1 Open the *Measurement* tab.
- 2 Choose the pencil button next to the *Detection Format* list.

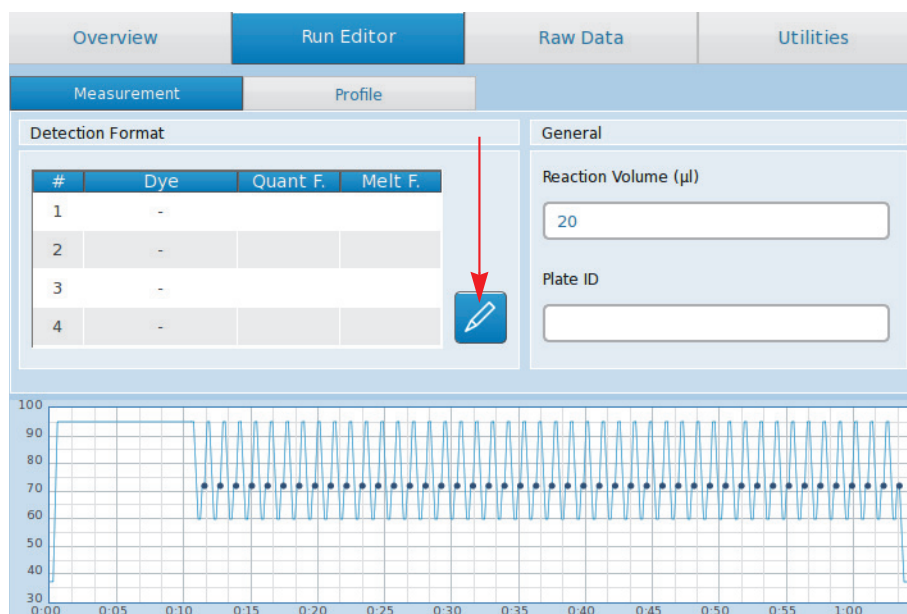

The *Detection Format* window area opens.

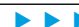

- 3 Choose the tab of the detection channel you want to use.

| Channel                                        |              |              |             |                      |
|------------------------------------------------|--------------|--------------|-------------|----------------------|
| 470/514      533/572      577/620      645/697 |              |              |             |                      |
| Selected                                       | Dye          | Quant Factor | Melt Factor | Integration Time [s] |
| <input checked="" type="radio"/>               | SYBR Green I | 20.00        | 1.20        | 1.00                 |
| <input type="radio"/>                          | ResoLight    | 20.00        | 1.20        | 1.00                 |
| <input type="radio"/>                          | FAM          | 10.00        | 1.20        | 1.00                 |

Integration Time [s]

☒ Dynamic      ☐ Manual

Back

- 4 In the *Selected* column, choose no more than one dye per detection channel, to specify that the corresponding channel is to be used.

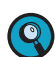

*Only one dye can be selected per channel. The software automatically deselects a dye if you try to select more than one dye in the same channel group.*

| Channel                                        |              |              |             |                      |
|------------------------------------------------|--------------|--------------|-------------|----------------------|
| 470/514      533/572      577/620      645/697 |              |              |             |                      |
| Selected                                       | Dye          | Quant Factor | Melt Factor | Integration Time [s] |
| <input checked="" type="radio"/>               | SYBR Green I | 20.00        | 1.20        | 1.00                 |
| <input type="radio"/>                          | ResoLight    | 20.00        | 1.20        | 1.00                 |
| <input type="radio"/>                          | FAM          | 10.00        | 1.20        | 1.00                 |

Integration Time [s]

☒ Dynamic      ☐ Manual

Back

- For *Quant Factor* and *Melt Factor*, leave the default values.
- For *Integration Time [s]*, leave the default value (*Dynamic*).

- 5 Repeat steps 3 and 4 to specify another detection channel for your detection format.

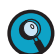

*You cannot combine SYBR Green I or the ResoLight dye with any dye of any other channel.*

- 6 Choose *Back* to close the window area.

## To specify the reaction volume for the experiment

- 1 In the *General* window area, choose the *Reaction Volume (µl)* field. A dialog box for specifying the value opens.

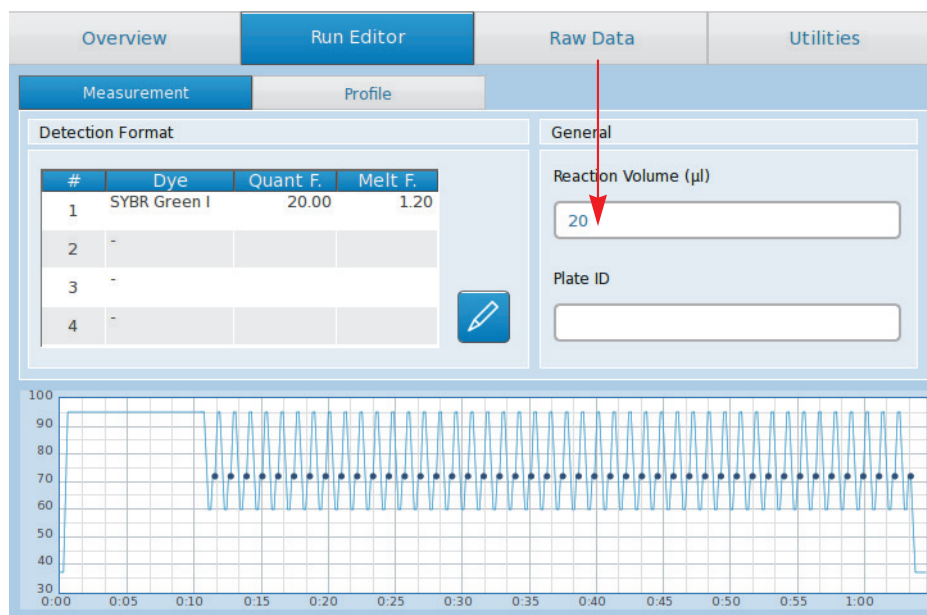

- 2 Specify the applicable reaction volume to be used in your experiment.  
The LightCycler® 96 Instrument supports reaction volumes from 10 to 50 µl.  
 For detailed information on the applicable value for the reaction volume, see the corresponding section in the chapter [Main applications](#), on page 57.  
As the LightCycler® 96 Instrument does not validate the reaction volume, ensure that the specified reaction volume matches the volume pipetted into the wells of the multiwell plate.

## To save the experiment

The LightCycler® 96 Instrument Software automatically saves all changes in the experiment file on the instrument.

The LightCycler® 96 Instrument Software supports the following experiment file types:

- ▶ \*.lc96p (LightCycler® 96 experiment files for processed experiments)
- ▶ \*.lc96u (LightCycler® 96 experiment files for unprocessed experiments)

 For detailed information on saving in the instrument software, refer to the *LightCycler® 96 System Operator's Guide*, chapter *LightCycler® 96 Instrument Software*.

## 4 Running the experiment

After defining the setup parameters (temperature profile, reaction volume, and detection format), and saving the definition, you are ready to run the LightCycler® 96 experiment.

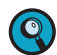

For starting an experiment run, the experiment must be transferred to the LightCycler® 96 Instrument. An experiment run can only be started on the instrument using the LightCycler® 96 Instrument Software. For detailed information on how to transfer an experiment to the instrument, see section [Transferring the experiment to the instrument](#), on page 30.

During an experiment run, it is not recommended to use a USB drive, for example, for exporting or importing data, or for synchronizing an experiment, as this may cause problems in the measurement process.

### 4.1 Starting the run

#### To start the experiment run

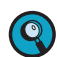

Before loading the multiwell plate into the LightCycler® 96 Instrument, it must be sealed with the self-adhesive sealing foil. Use the sealing foil applicator provided with the instrument for proper sealing.

Always centrifuge the filled and sealed plate before loading it into the instrument. For detailed information, see the corresponding section in the chapter [Main applications](#), on page 57.

For detailed information on how to set up the samples, see the corresponding section in the chapter [Main applications](#), on page 57. For comprehensive information, refer also to the LightCycler® 96 System Operator's Guide, chapter "System description".

1

Load the LightCycler® 480 Multiwell Plate 96 with the samples into the LightCycler® 96 Instrument.

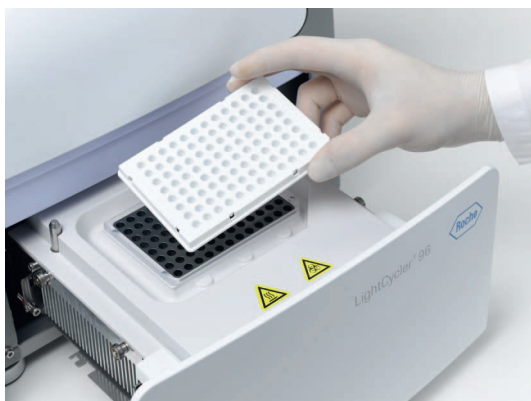

2

Ensure that the temperature profile of the experiment is specified correctly, for example, by establishing a validation process. For detailed information, see section [Creating the temperature profile](#), on page 35.

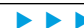

- 3 In the global action bar of the LightCycler® 96 Instrument Software main window, choose *Start*.

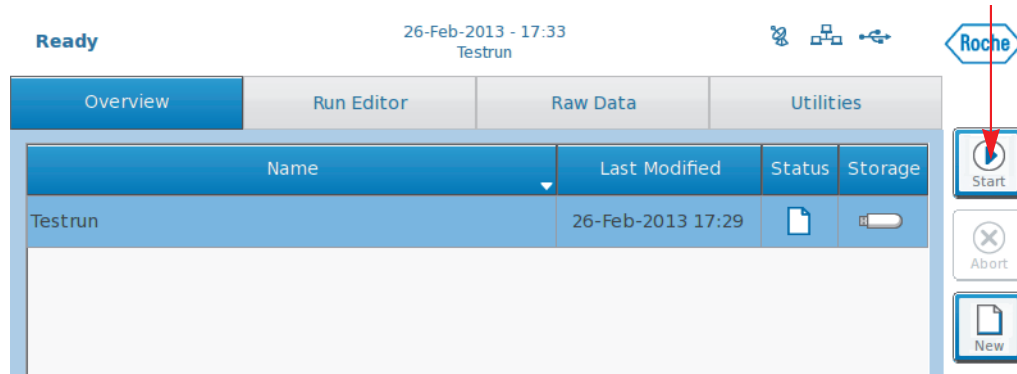

- 4 Choose the *Raw Data* tab to view the progress of the running experiment.

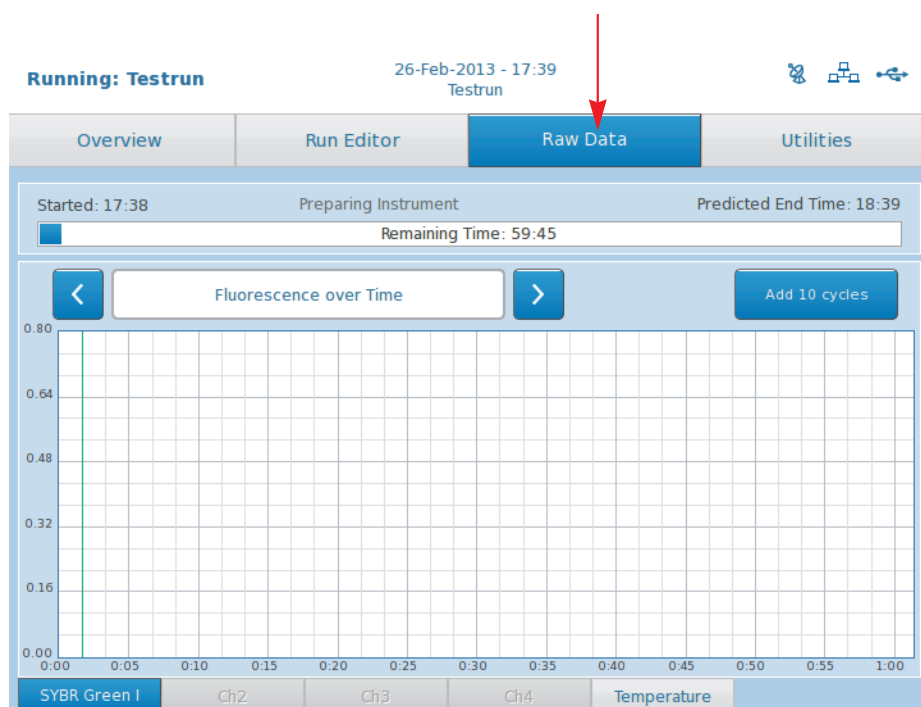

## 4.2 Monitoring the run

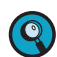

If the LightCycler® 96 Instrument and the computer running the LightCycler® 96 Application Software are not connected to a network, an experiment run can only be monitored on the instrument using the LightCycler® 96 Instrument Software.

### To monitor the experiment run

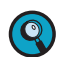

For a detailed description of the charts on the 'Raw Data' tab, refer to the LightCycler® 96 System Operator's Guide, chapter LightCycler® 96 Instrument Software.

- 1 On the *Raw Data* tab, choose the *Temperature* tab to monitor the summary of the programs selected for the experiment and their temperature and time settings in real time.

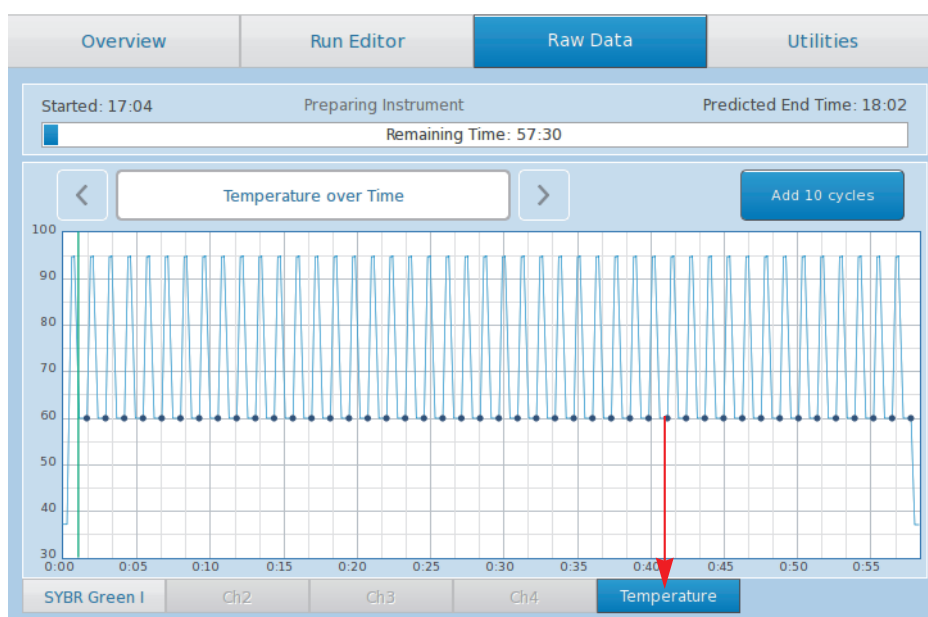

- 2 Choose one of the <dye> tabs, to monitor the relevant fluorescence curves, that is, the fluorescence intensity against the time in hours, minutes, and seconds for the entire run in real time. There is one curve for each sample that has a gene labeled with the selected dye.

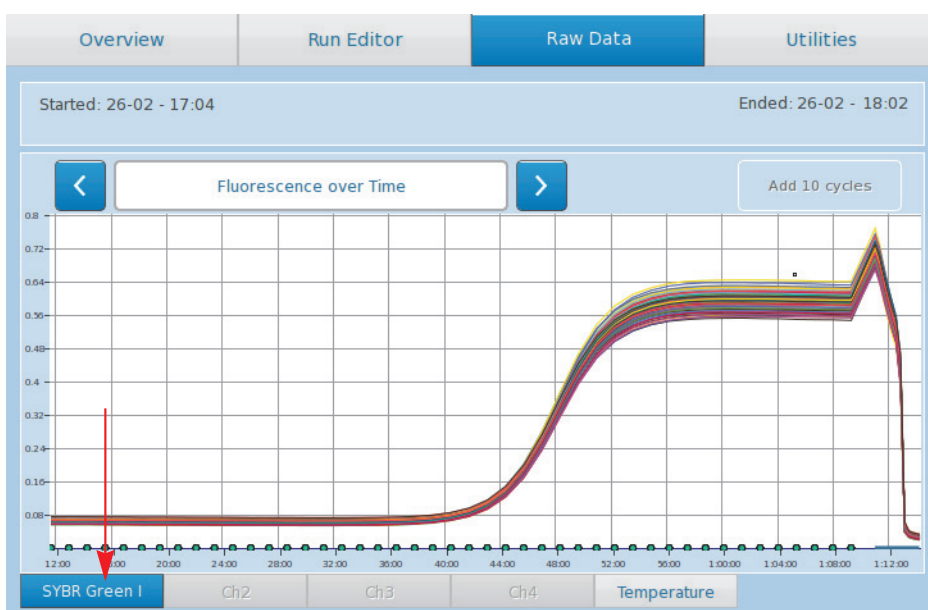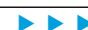

- 3 For amplification programs only:
- ▶ In the toggle button, select *Fluorescence Heat Map*. The heat map for the selected dye is displayed.
  - ▶ Monitor the heat map for the selected dye.

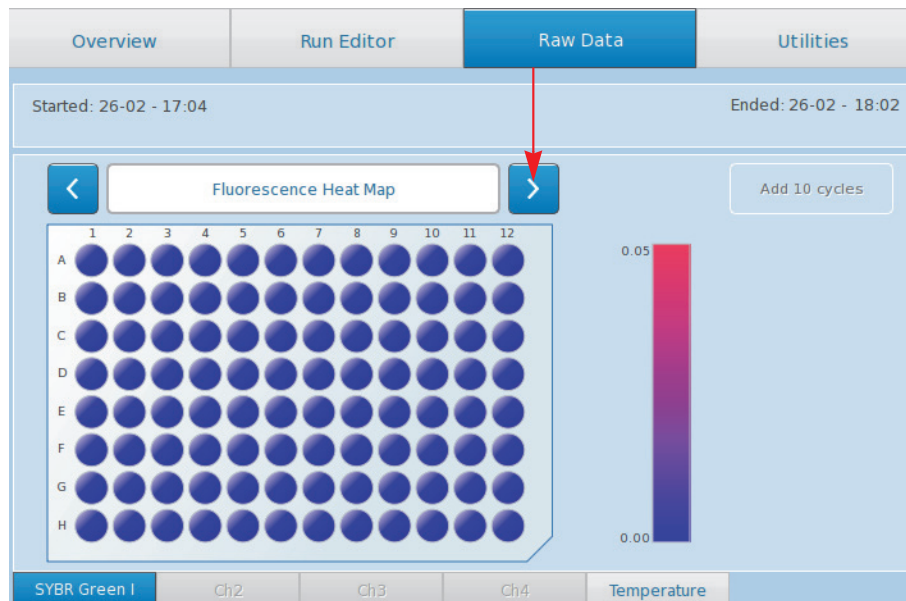

### Run finished

The end of a run is indicated as follows:

- ▶ The status bar shows the instrument status *Ready*.
- ▶ On the *Overview* tab, the icon in the *Status* column changes to (Executed).
- ▶ The LightCycler® 96 Instrument unlocks the loading module.
- ▶ In the experiment progress window area, the start time and the end time are shown.
- ▶ The *Raw Data* tab provides the final raw data.

## 5 Transferring the experiment from the instrument to the application software

After the experiment run, the raw data gathered by the instrument software must be transferred to the application software for analysis.

The LightCycler® 96 Instrument Software automatically saves all changes in an experiment file. The experiment file is saved according to its original location:

- ▶ On the LightCycler® 96 Instrument.
- ▶ On the USB drive.
- ▶ On both media if the operator has synchronized the storage locations.  
For detailed information on synchronizing, refer to the help browser of the LightCycler® 96 Instrument Software.

To transfer an experiment file including the raw data from the instrument to the application software:

- ▶ When the run is finished, save the experiment file including the raw data to a USB drive, see section [To save the experiment raw data to the USB drive](#), below.
- ▶ Transfer the stored data to a computer on which the LightCycler® 96 Application Software is installed. Open the experiment in the application software for data analysis, see section [To transfer the stored data to the application software](#), on page 49.

### To save the experiment raw data to the USB drive

 This procedure is optional. You only have to save the raw data to the USB drive if it is only saved on the instrument.

- 1 Insert a USB drive into the USB interface on the right side of the instrument.

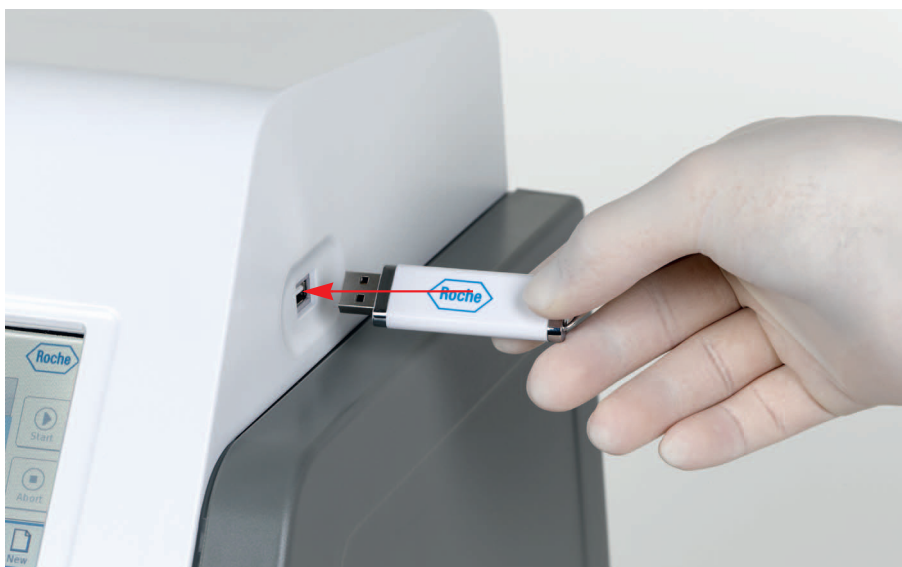

- 2 Wait until the USB icon  is displayed in the status bar of the instrument software.

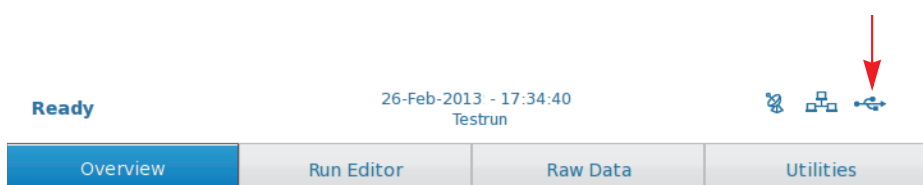

- 3 On the *Overview* tab, select the experiment you want to transfer to the application software.

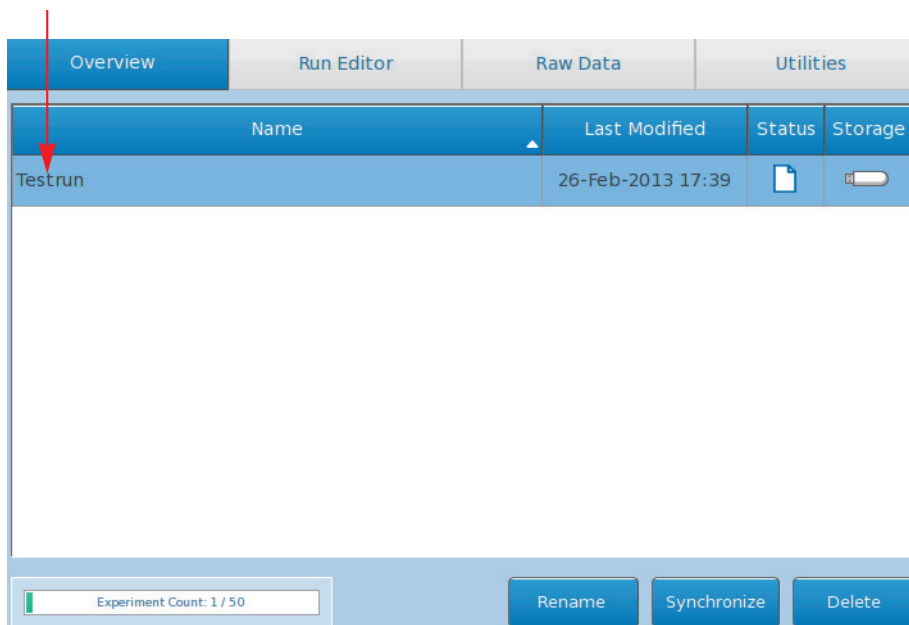

- 4 Choose *Synchronize* to store the experiment on the USB drive.

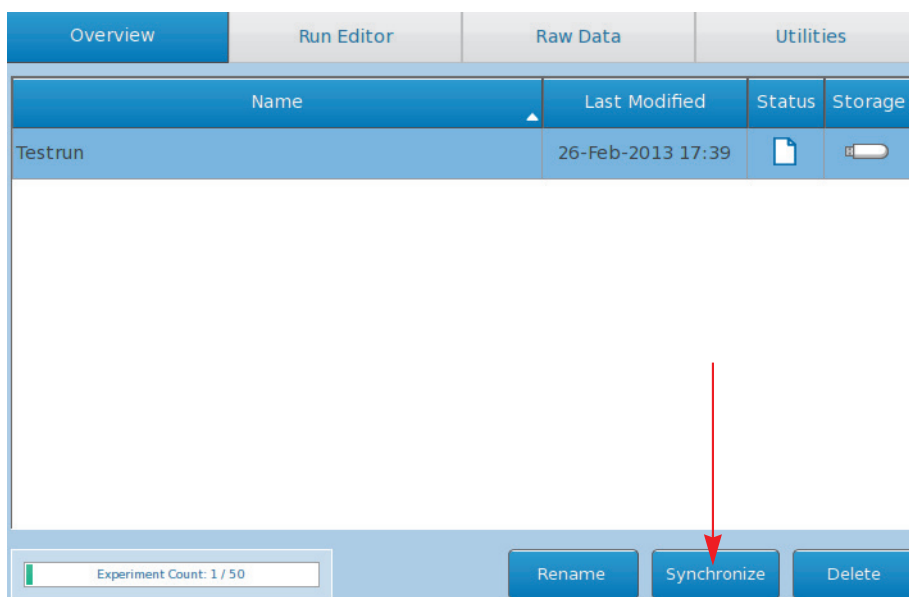

In the *Storage* column of the selected experiment, the *Synchronized* icon  is shown.

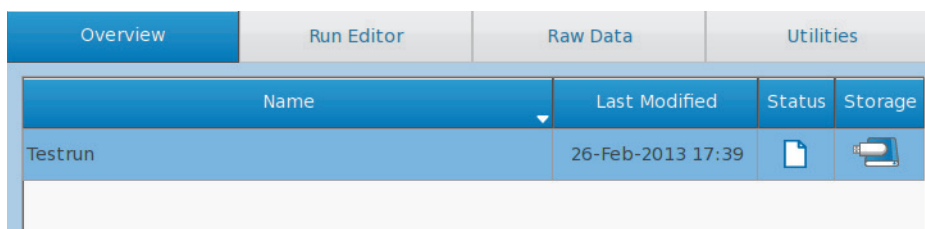

- 5 Remove the USB drive from the instrument.

## To transfer the stored data to the application software

- 1 Insert the USB drive with the experiment file including the raw data into a USB interface on your computer running the LightCycler® 96 Application Software.
- 2 In the tool bar of the application software main window, choose the *Open Experiment* icon.

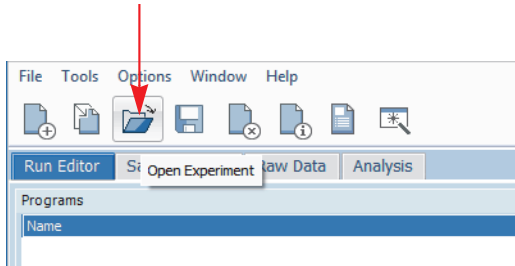

The *Open* dialog box for choosing an experiment opens.

- 3 Navigate to the *Experiments* folder on the USB drive, and select the experiment file.
- 4 Choose *Open*. The experiment opens in the main window.
- 5 In the menu bar, choose *File > Save As* to store the data to a specified location on your computer.

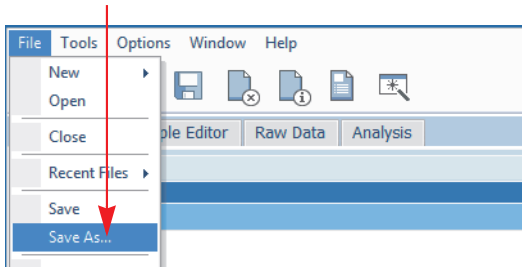

The *Save As* dialog box opens.

- 6 Navigate to the directory where you want to store the experiment file.  
 By default, the default experiment directory is displayed. For detailed information, refer to the *LightCycler® 96 System Operator's Guide, chapter LightCycler® 96 Application Software*.
- 7 Choose *Save*. The dialog box closes and the experiment is saved as a LightCycler® 96 file (\*.lc96p).

# B

## 6 Editing the sample list

For each experiment, you must edit the samples, that is, create, edit, delete, and rearrange samples and genes present in the wells, as well as the dyes used to label each gene. This sample data is then used to perform the analysis.

For editing the sample list, the experiment must be opened in the LightCycler® 96 Application Software. You can edit the sample list before or after the experiment run, depending on your preferred routine.

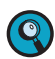

*For editing the sample list, the ‘Sample Editor’ requires information about the selected dye(s). When you edit the sample list before the experiment run (before transferring the experiment to the instrument for running), make sure that you have defined the run profile and selected the detection format in the ‘Run Editor’.*

*The LightCycler® 96 Application Software offers two different views for editing the samples: the plate view and the table view. This user training guide describes how to edit the samples using the plate view, which shows the samples in 96 wells laid out to match the physical instrument. Changes in the plate view are immediately displayed in the table view and vice versa.*

This section provides step-by-step information on how to edit the sample list in general. For detailed information on further analysis-specific sample definitions for the different main applications, see the corresponding section in the chapter [Main applications](#), on page 57.

For a comprehensive description of all options of the LightCycler® 96 Application Software, refer to the *LightCycler® 96 System Operator’s Guide*, chapter *LightCycler® 96 Application Software*.

To edit the sample list:

- ▶ Clear the empty wells to display only the applicable data, see section [To clear empty wells](#), on page 51.
- ▶ Specify the sample names and types, see section [To edit the sample names and the sample types](#), on page 53.
- ▶ Assign a gene to the dye(s), see section [To assign a gene to the dye\(s\)](#), on page 55.

## To clear empty wells

- 1 Open the *Sample Editor* tab.
- 2 Open the *Plate View*.
- 3 In the multiwell plate image, choose the wells you want to clear, for example, columns 7 to 12:
  - ▶ Choose table header 7 to start the selection.
  - ▶ Press and hold down the [Shift] key on your keyboard.
  - ▶ Choose table header 12 to finish the selection.
 All samples in the columns 7 to 12 are selected.

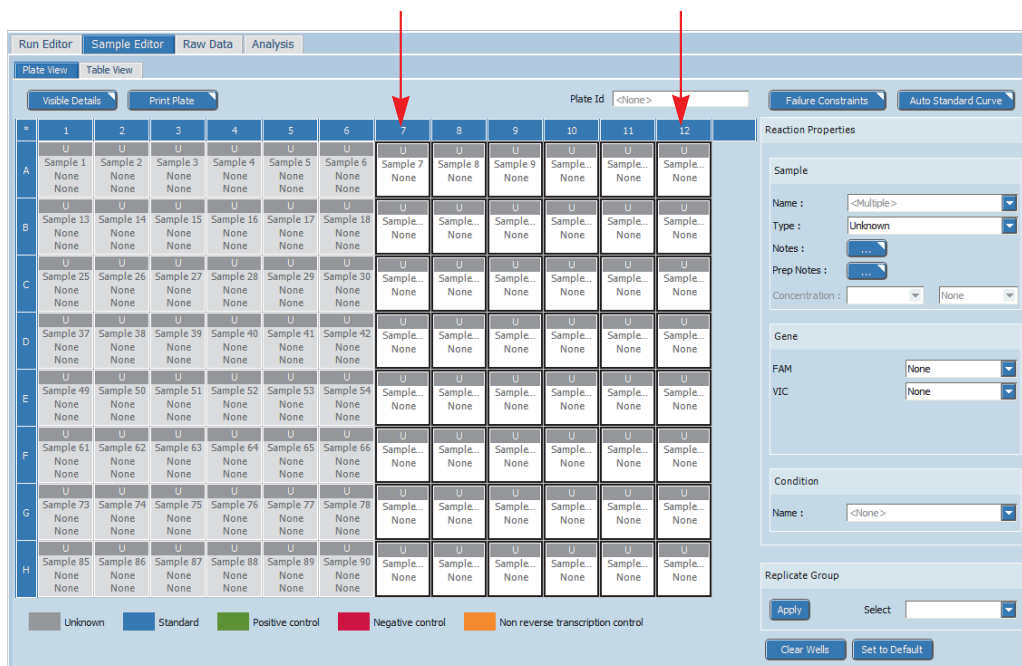

4

Choose *Clear Wells*.

The screenshot shows the 'Sample Editor' tab in the LightCycler 96 software. The main area displays a 96-well plate grid. Columns 7 through 12 are highlighted in blue, indicating they are selected. The 'Clear Wells' button in the bottom right corner is highlighted with a red arrow. The right panel shows the 'Reaction Properties' for a selected well, with fields for Name, Type, Notes, Prep Notes, Concentration, Gene (FAM, VIC), Condition, and Replicate Group.

All property values are removed from the selected wells and the wells are deactivated. This means they can no longer be edited and are not displayed in the table view or the analysis windows.

The screenshot shows the 'Sample Editor' tab in the LightCycler 96 software. The main area displays a 96-well plate grid. Columns 7 through 12 are now empty, indicating they have been cleared. The 'Clear Wells' button is no longer highlighted.

5

Repeat steps 3 and 4 for one or more rows of the multiwell plate image if necessary.

## To edit the sample names and the sample types

- 1 Open the *Sample Editor* tab.

For a new experiment, the *Plate View* tab shows a schematic of the multiwell plate mount, that is, the multiwell plate image, with the following data for each well:

- ▶ The default sample names *Sample 1* to *Sample 96*.
- ▶ The sample type *Unknown* for all samples.

The screenshot shows the *Sample Editor* interface. The *Plate View* tab is active, displaying a multiwell plate grid. The grid is populated with sample names (Sample 1 to Sample 96) and their types (Unknown). The right panel shows the *Reaction Properties* for the selected sample (Sample 1), including Name, Type, Notes, Prep Notes, Concentration, Gene, FAM, VIC, Condition, and Replicate Group. The bottom of the grid shows a legend for sample types: Unknown (grey), Standard (blue), Positive control (green), Negative control (red), and Non reverse transcription control (orange).

- 2 In the multiwell plate image, select a well or a range of wells to edit the corresponding sample-specific properties.

The screenshot shows the *Sample Editor* interface. A red arrow points to the well containing Sample 7, indicating selection. The interface is identical to the previous screenshot, showing the multiwell plate grid, the right panel for Reaction Properties, and the legend at the bottom.

3 In the *Reaction Properties* window area, edit the sample name for the selected well(s):

- ▶ Choose the *Name* list.
- ▶ Select the relevant name from the list or type in the name.

The screenshot shows the 'Reaction Properties' window on the right side of the software interface. The 'Sample' section has a 'Name' dropdown menu with 'Sample 7' selected. A red arrow points to this dropdown. The 'Type' is set to 'Unknown'. The 'Condition' section has a 'Name' dropdown set to '<None>'. The 'Replicate Group' section has an 'Apply' button and a 'Select' dropdown. The main plate view on the left shows a 96-well plate with sample names assigned to wells A1 through H6.

Ensure that the sample assignment on the 'Sample Editor' tab matches the pipetting scheme on the multiwell plate.

4 In the *Type* list, choose the applicable sample type for the selected well(s).  
In the multiwell plate image, each well is colored to visualize the sample type.

The screenshot shows the 'Reaction Properties' window on the right side of the software interface. The 'Sample' section has a 'Type' dropdown menu with 'Unknown' selected. A red arrow points to this dropdown. The 'Condition' section has a 'Name' dropdown set to '<None>'. The 'Replicate Group' section has an 'Apply' button and a 'Select' dropdown. The main plate view on the left shows a 96-well plate with sample names assigned to wells A1 through H6.

For detailed information on the applicable sample type for the samples in your specific experiment, see the corresponding section in the chapter [Main applications](#), on page 57.

For detailed information on all available sample types, refer to the *LightCycler® 96 System Operator's Guide*, chapter B, section "Sample Editor tab".

5 Repeat steps 2 to 4 to edit the corresponding sample-specific properties for another well or range of wells according to the relevant pipetting scheme. See the corresponding section in the chapter [Main applications](#), on page 57.

The *Plate View* tab now displays the assigned samples.

## To assign a gene to the dye(s)

- 1 In the multiwell plate image, proceed as follows:
  - ▶ To select all the wells, choose the asterisk (\*) in the upper left corner.
  - ▶ To select all wells in one or more particular rows or columns, select the corresponding table rows or columns using the [Shift] key.

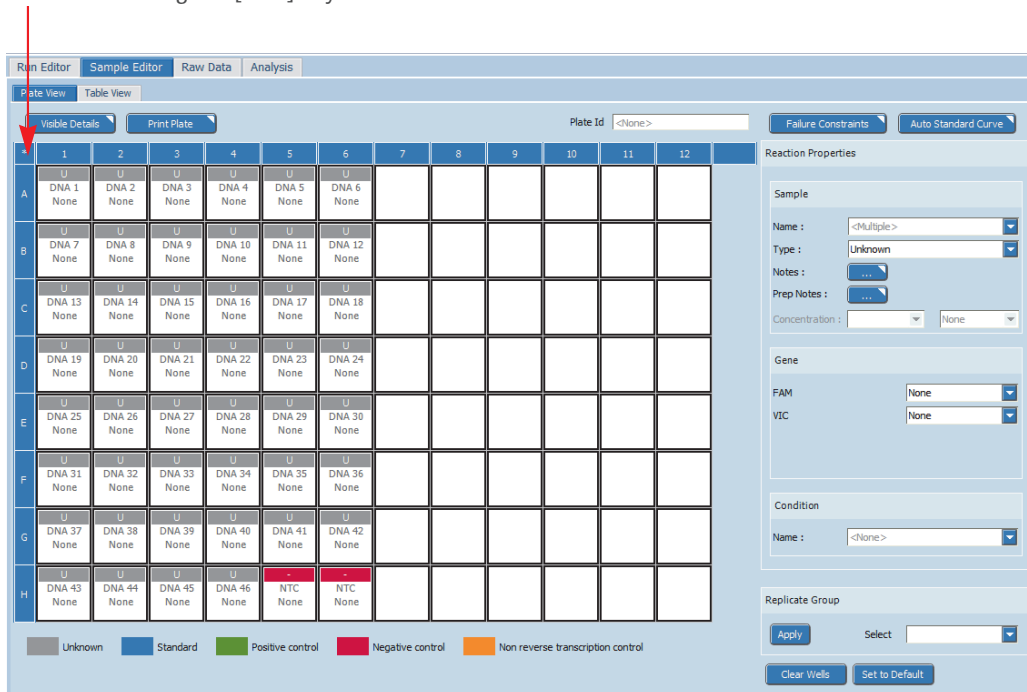

- 2 In the *Reaction Properties* window area, choose the text field next to the dye, to which you want to assign a gene, for example, the *FAM* dye.
- 3 Type in the appropriate gene name, for example, *Gene 1*.  
The gene *Gene 1* is assigned to the *FAM* dye.

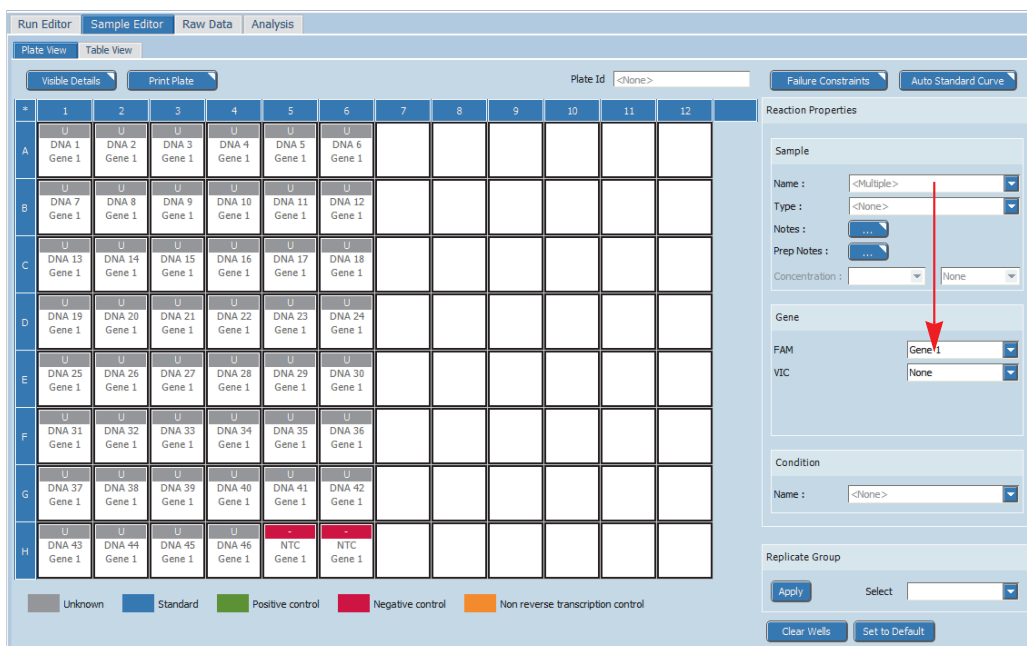

- 4 If applicable, repeat the steps 1 to 3 for another dye, for example, for the *VIC* dye.

---

## To save the experiment

- 1 In the tool bar, choose the *Save Experiment* icon to save the experiment.

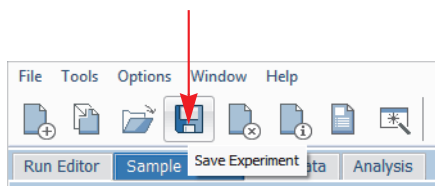

B

# Main applications

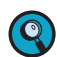

*For information on the order in which you must perform the individual work steps of a complete application workflow, see section [Overview](#), on page 15.*

This chapter shows how to perform experiments with the LightCycler® 96 System using the following examples:

- ▶ [Absolute quantification](#), on page 58.
- ▶ [Endpoint SNP genotyping](#), on page 78.
- ▶ [Relative quantification](#), on page 98.
- ▶ [Qualitative detection](#), on page 120.
- ▶ [T<sub>m</sub> calling](#), on page 134.
- ▶ [High resolution melting](#), on page 147.

For all experiments a LightCycler® 480 Multiwell Plate 96, white, is used.

For each application, this chapter provides the following information:

- ▶ How to set up the nucleic acid samples.
- ▶ The applicable experiment run parameters relating to the temperature profile, detection format, and reaction volume.
- ▶ The applicable basic sample data parameters relating to the empty wells, the sample names, the sample types, and the gene assignment.
- ▶ How to edit the special sample data settings.
- ▶ How to analyze the results.

## Preconditions for all runs

A run can only be performed if:

- ▶ The instrument is started; see section [Starting the LightCycler® 96 Instrument](#), on page 17.
- ▶ The experiment definition is transferred to the instrument if it was defined with the application software.

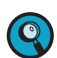

*For a detailed description of the LightCycler® 96 Application Software and all elements of the graphical user interface, refer to the LightCycler® 96 System Operator's Guide, chapter [LightCycler® 96 Application Software](#).*

*For a detailed description of the LightCycler® 96 Instrument Software and all elements of the graphical user interface, refer to the LightCycler® 96 System Operator's Guide, chapter [LightCycler® 96 Instrument Software](#).*

# 1 Absolute quantification

Absolute quantification is used to quantify a gene and express the final result as an absolute value (for example, copies/ml). Samples with an unknown quantity of gene are amplified alongside a dilution series of a gene-specific standard with known concentration. To obtain an absolute value for an unknown quantity of gene, the C<sub>q</sub> of an unknown sample is compared to those of standards with known quantities.

In an absolute quantification analysis, the known concentration of each standard is automatically plotted against the measured C<sub>q</sub> values. The resulting regression line is called the standard curve and shows the correlation between C<sub>q</sub> and quantity. The concentration of an unknown sample is calculated by comparing its C<sub>q</sub> with the standard curve.

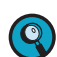

For detailed information on absolute quantification analysis, refer to the *LightCycler® 96 System Operator's Guide*, chapter A, section "Analysis principles".

## 1.1 Experiment overview

The following example describes how to set up, run, and analyze an assay for gene quantification using a FAM-labeled hydrolysis probe. Quantification of samples is based on a 5-point standard curve derived from a plasmid standard dilution series covering a range of known quantities.

The assay is performed using a LightCycler® 480 Multiwell Plate 96, white. Each sample is set up in triplicate.

|          |                                                                                                                                                                             |
|----------|-----------------------------------------------------------------------------------------------------------------------------------------------------------------------------|
| Samples  | <ul style="list-style-type: none"> <li>▶ Standard samples: Human Genomic DNA from human blood 0.1 ng to 1000 ng</li> <li>▶ 5 DNA samples (unknown concentration)</li> </ul> |
| Reagents | <ul style="list-style-type: none"> <li>▶ FastStart Essential DNA Probes Master (2 x conc.)</li> <li>▶ RealTime ready Catalog Assays<br/>Assay ID: 137341 (HSPA2)</li> </ul> |

## 1.2 Setting up the samples

### Sample dilution

The standard sample is diluted to a 10-fold dilution series covering a range of 0.1 to 1000 ng/5 µl.

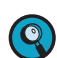

Continuously cool the samples during setup by keeping the reaction tubes on ice.

### Controls

To ensure the absence of contaminating nucleic acids in PCR reagents, it is highly recommended that you include a no template control (NTC) in your experiment.

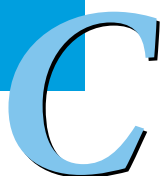

## PCR mix

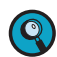

When setting up the PCR mix, compensate for pipetting losses. We recommend preparing PCR mixes with 10% extra volume.

The table below shows the components included in the PCR mix for one 20 µl reaction. The PCR mix volume is 15 µl for a subsequent sample input of 5 µl/reaction.

| Component                                | Concentration | Volume       | Final conc. |
|------------------------------------------|---------------|--------------|-------------|
| Water, PCR grade                         |               | 4 µl         |             |
| FastStart Essential DNA Probes Master    | 2 x conc.     | 10 µl        | 1 x conc.   |
| RealTime ready Catalog Assays (HSPA2)    | 20 x conc.    | 1 µl         | 1 x conc.   |
| <b>Total volume (without sample DNA)</b> |               | <b>15 µl</b> |             |

## Pipetting scheme

- 1 Pipette 15 µl of the PCR mix into 33 wells of the multiwell plate according to the following scheme.
- 2 Pipette 5 µl of standard dilutions into the corresponding wells according to the following scheme (each in triplicate).
- 3 Pipette 5 µl of sample into the corresponding wells according to the following scheme (each in triplicate).
- 4 For the NTCs, pipette 5 µl of water (instead of DNA sample) into the corresponding wells according to the following scheme.

|   | 1        | 2        | 3        | 4        | 5        | 6   | 7 | 8 | 9 | 10 | 11 | 12 |
|---|----------|----------|----------|----------|----------|-----|---|---|---|----|----|----|
| A | Std1     | Std2     | Std3     | Std4     | Std5     | NTC |   |   |   |    |    |    |
| B | Std1     | Std2     | Std3     | Std4     | Std5     | NTC |   |   |   |    |    |    |
| C | Std1     | Std2     | Std3     | Std4     | Std5     | NTC |   |   |   |    |    |    |
| D | Sample 1 | Sample 2 | Sample 3 | Sample 4 | Sample 5 |     |   |   |   |    |    |    |
| E | Sample 1 | Sample 2 | Sample 3 | Sample 4 | Sample 5 |     |   |   |   |    |    |    |
| F | Sample 1 | Sample 2 | Sample 3 | Sample 4 | Sample 5 |     |   |   |   |    |    |    |
| G |          |          |          |          |          |     |   |   |   |    |    |    |
| H |          |          |          |          |          |     |   |   |   |    |    |    |

## Centrifugation

- 1 Seal the multiwell plate with the LightCycler® 480 Sealing Foil using the sealing foil applicator (provided with the system package).
- 2 Centrifuge the multiwell plate at 1500 x g for 2 minutes in a standard swing-bucket centrifuge, using a rotor for multiwell plates.

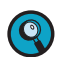

Make sure you balance the multiwell plate with a suitable counterweight (for example, another multiwell plate).

### 1.3 Experiment run parameters

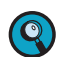

For detailed information on how to program an experiment, see one of the following sections:

[Programming the experiment with the LightCycler® 96 Application Software](#), on page 20.

[Programming the experiment with the LightCycler® 96 Instrument Software](#), on page 32.

Use a standard PCR profile for hydrolysis probes.

The experiment includes the run parameters listed in the following tables.

#### Temperature profile

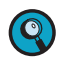

For detailed information on how to program a temperature profile, see one of the following sections:

For working with the LightCycler® 96 Application Software: [Creating the temperature profile](#), on page 23.

For working with the LightCycler® 96 Instrument Software: [Creating the temperature profile](#), on page 35.

For this example, use the following heating and cooling cycles:

| Programs             |                  | Steps       |              |             |                  |
|----------------------|------------------|-------------|--------------|-------------|------------------|
| Name                 | Number of cycles | Ramp (°C/s) | Duration (s) | Target (°C) | Acquisition Mode |
| Preincubation        | 1                | 4.4         | 600          | 95          | None             |
| 3-step amplification | 45               | 4.4         | 10           | 95          | None             |
|                      |                  | 2.2         | 30           | 60          | None             |
|                      |                  | 4.4         | 1            | 72          | Single           |
| Cooling              | 1                | 2.2         | 30           | 37          | None             |

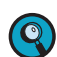

It is not necessary to add a separate cooling program at the end of the run. At the end of each run, the samples are automatically cooled to +37°C.

For the ramp rate for heating and cooling (*Ramp* (°C/s)), the default values are used in this example.

For the steps of the amplification program, the following default settings are used in this example:

- ▶ LightCycler® 96 Application Software: For *Gradient* and *Touch down*, the default settings are used.
- ▶ For *Mode*, the default *Standard* option is used.

In the *Temperature Profile* window area, the following graphical summary of the programs selected for the experiment and their temperature and time settings is displayed.

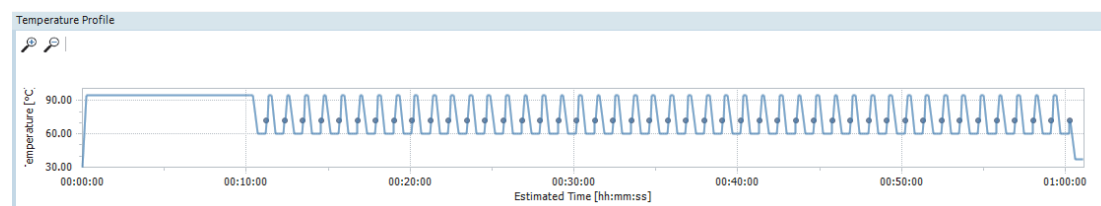

## Detection format

Selecting the dye for this mono-color experiment determines the channel combination for the measurement during the run. For all other parameters, the default values are used in this example.

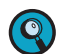

For detailed information on how to specify the detection format, see the following sections:  
For working with the LightCycler® 96 Application Software: [To specify the detection format for the experiment](#), on page 27.  
For working with the LightCycler® 96 Instrument Software: [To specify the detection format for the experiment](#), on page 40.

For this example, use the following channel:

| Dye | Channel |
|-----|---------|
| FAM | 470/514 |

## Reaction volume

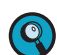

As the LightCycler® 96 Instrument does not validate the reaction volume, ensure that the specified reaction volume matches the volume pipetted into the wells of the multiwell plate.

For detailed information on how to specify the reaction volume, see one of the following sections:  
For working with the LightCycler® 96 Application Software: [To specify the reaction volume for the experiment](#), on page 27.  
For working with the LightCycler® 96 Instrument Software: [To specify the reaction volume for the experiment](#), on page 42.

For this example, use the following reaction volume:

| Reaction volume |
|-----------------|
| 20 µl           |

## Experiment run

Once you have set up the samples and defined the experiment run parameters, you can start the run. For detailed information on how to run the experiment, see section [Running the experiment](#), on page 43.

## 1.4 Editing the sample data

For editing the sample data, the experiment must be opened in the LightCycler® 96 Application Software. You can edit the sample list before or after the run, depending on your preferred routine.

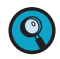

*The LightCycler® 96 Application Software offers two different views for editing the samples: the plate view and the table view. This user training guide describes how to edit the samples using the plate view, which shows the samples in 96 wells laid out to match the physical instrument. Changes in the plate view are immediately displayed in the table view and vice versa.*

*For detailed information on the 'Sample Editor' tab, refer to the LightCycler® 96 System Operator's Guide, chapter B, section "Sample Editor tab".*

To edit the sample list:

- ▶ Clear empty wells to eliminate them from the analysis, see section [Empty wells](#) below.
- ▶ Edit the sample names, see section [Sample names](#), on page 63.
- ▶ Edit the sample types, see section [Sample types](#), on page 64.
- ▶ Assign a gene for the dye, see section [Gene assignment](#), on page 65.
- ▶ Specify the concentration values for the applicable standard quantity of the gene, see section [To define the concentration values](#), on page 65.
- ▶ Check if the replicate groups are correctly assigned to all samples, see section [Replicate groups](#), on page 67.

### Empty wells

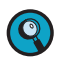

*For detailed information on how to clear empty wells, see section [To clear empty wells](#), on page 51.*

For this example, clear the following wells (see also the multiwell plate image below):

- ▶ Columns 7 to 12
- ▶ Rows G and H
- ▶ Wells D6, E6, F6

| # | 1              | 2              | 3              | 4              | 5              | 6              | 7 | 8 | 9 | 10 | 11 | 12 |
|---|----------------|----------------|----------------|----------------|----------------|----------------|---|---|---|----|----|----|
| A | U<br>Sample... | U<br>Sample 2  | U<br>Sample 3  | U<br>Sample 4  | U<br>Sample 5  | U<br>Sample 6  |   |   |   |    |    |    |
| B | U<br>Sample... | U<br>Sample... | U<br>Sample... | U<br>Sample... | U<br>Sample... | U<br>Sample... |   |   |   |    |    |    |
| C | U<br>Sample... | U<br>Sample... | U<br>Sample... | U<br>Sample... | U<br>Sample... | U<br>Sample... |   |   |   |    |    |    |
| D | U<br>Sample... | U<br>Sample... | U<br>Sample... | U<br>Sample... | U<br>Sample... |                |   |   |   |    |    |    |
| E | U<br>Sample... | U<br>Sample... | U<br>Sample... | U<br>Sample... | U<br>Sample... |                |   |   |   |    |    |    |
| F | U<br>Sample... | U<br>Sample... | U<br>Sample... | U<br>Sample... | U<br>Sample... |                |   |   |   |    |    |    |
| G |                |                |                |                |                |                |   |   |   |    |    |    |
| H |                |                |                |                |                |                |   |   |   |    |    |    |

## Sample names



For detailed information on how to edit the sample names, see section [To edit the sample names and the sample types](#), on page 53.

For this example, the following sample names apply (see also the multiwell plate image below):

| Name    | Samples in the plate view                        |
|---------|--------------------------------------------------|
| Std1    | For the unknown samples in wells A1, B1, and C1  |
| Std2    | For the unknown samples in wells A2, B2, and C2  |
| Std3    | For the unknown samples in wells A3, B3, and C3  |
| Std4    | For the unknown samples in wells A4, B4, and C4  |
| Std5    | For the unknown samples in wells A5, B5, and C5  |
| Sample1 | For the unknown samples in wells D1, E1, and F1  |
| Sample2 | For the unknown samples in wells D2, E2, and F2  |
| Sample3 | For the unknown samples in wells D3, E3, and F3  |
| Sample4 | For the unknown samples in wells D4, E4, and F4  |
| Sample5 | For the unknown samples in wells D5, E5, and F5  |
| Ntc     | For the negative control in wells A6, B6, and C6 |

| * | 1             | 2             | 3             | 4             | 5             | 6        | 7 | 8 | 9 | 10 | 11 | 12 |
|---|---------------|---------------|---------------|---------------|---------------|----------|---|---|---|----|----|----|
| A | U<br>Std1     | U<br>Std2     | U<br>Std3     | U<br>Std4     | U<br>Std5     | U<br>Ntc |   |   |   |    |    |    |
| B | U<br>Std1     | U<br>Std2     | U<br>Std3     | U<br>Std4     | U<br>Std5     | U<br>Ntc |   |   |   |    |    |    |
| C | U<br>Std1     | U<br>Std2     | U<br>Std3     | U<br>Std4     | U<br>Std5     | U<br>Ntc |   |   |   |    |    |    |
| D | U<br>Sample 1 | U<br>Sample 2 | U<br>Sample 3 | U<br>Sample 4 | U<br>Sample 5 |          |   |   |   |    |    |    |
| E | U<br>Sample 1 | U<br>Sample 2 | U<br>Sample 3 | U<br>Sample 4 | U<br>Sample 5 |          |   |   |   |    |    |    |
| F | U<br>Sample 1 | U<br>Sample 2 | U<br>Sample 3 | U<br>Sample 4 | U<br>Sample 5 |          |   |   |   |    |    |    |
| G |               |               |               |               |               |          |   |   |   |    |    |    |
| H |               |               |               |               |               |          |   |   |   |    |    |    |

## Sample types

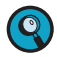

For detailed information on how to edit the sample types, see section [To edit the sample names and the sample types](#), on page 53.

In this example the following sample types apply:

| Type              | Samples in the plate view                        |
|-------------------|--------------------------------------------------|
| Standard          | For the samples <i>Std1</i> to <i>Std5</i>       |
| Unknown (default) | For the samples <i>Sample1</i> to <i>Sample5</i> |
| Negative control  | For the samples <i>Ntc</i> (NTC)                 |

|   | 1             | 2             | 3             | 4             | 5             | 6        | 7 | 8 | 9 | 10 | 11 | 12 |
|---|---------------|---------------|---------------|---------------|---------------|----------|---|---|---|----|----|----|
| A | S<br>Std1     | S<br>Std2     | S<br>Std3     | S<br>Std4     | S<br>Std5     | -<br>Ntc |   |   |   |    |    |    |
| B | S<br>Std1     | S<br>Std2     | S<br>Std3     | S<br>Std4     | S<br>Std5     | -<br>Ntc |   |   |   |    |    |    |
| C | S<br>Std1     | S<br>Std2     | S<br>Std3     | S<br>Std4     | S<br>Std5     | -<br>Ntc |   |   |   |    |    |    |
| D | U<br>Sample 1 | U<br>Sample 2 | U<br>Sample 3 | U<br>Sample 4 | U<br>Sample 5 |          |   |   |   |    |    |    |
| E | U<br>Sample 1 | U<br>Sample 2 | U<br>Sample 3 | U<br>Sample 4 | U<br>Sample 5 |          |   |   |   |    |    |    |
| F | U<br>Sample 1 | U<br>Sample 2 | U<br>Sample 3 | U<br>Sample 4 | U<br>Sample 5 |          |   |   |   |    |    |    |
| G |               |               |               |               |               |          |   |   |   |    |    |    |
| H |               |               |               |               |               |          |   |   |   |    |    |    |

Unknown
Standard
Positive control
Negative control
Non reverse transcription control

## Gene assignment

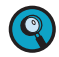

For detailed information on how to assign a gene to the dye, see section [To assign a gene to the dye\(s\)](#), on page 55.

In this example the following gene assignment applies:

| Gene name | Dye | Samples in the plate view |
|-----------|-----|---------------------------|
| Gene 1    | FAM | For all the samples       |

|   | 1                     | 2                     | 3                     | 4                     | 5                     | 6                 | 7 | 8 | 9 | 10 | 11 | 12 |
|---|-----------------------|-----------------------|-----------------------|-----------------------|-----------------------|-------------------|---|---|---|----|----|----|
| A | S<br>Std1<br>Gene1    | S<br>Std2<br>Gene1    | S<br>Std3<br>Gene1    | S<br>Std4<br>Gene1    | S<br>Std5<br>Gene1    | -<br>Ntc<br>Gene1 |   |   |   |    |    |    |
| B | S<br>Std1<br>Gene1    | S<br>Std2<br>Gene1    | S<br>Std3<br>Gene1    | S<br>Std4<br>Gene1    | S<br>Std5<br>Gene1    | -<br>Ntc<br>Gene1 |   |   |   |    |    |    |
| C | S<br>Std1<br>Gene1    | S<br>Std2<br>Gene1    | S<br>Std3<br>Gene1    | S<br>Std4<br>Gene1    | S<br>Std5<br>Gene1    | -<br>Ntc<br>Gene1 |   |   |   |    |    |    |
| D | U<br>Sample1<br>Gene1 | U<br>Sample2<br>Gene1 | U<br>Sample3<br>Gene1 | U<br>Sample4<br>Gene1 | U<br>Sample5<br>Gene1 |                   |   |   |   |    |    |    |
| E | U<br>Sample1<br>Gene1 | U<br>Sample2<br>Gene1 | U<br>Sample3<br>Gene1 | U<br>Sample4<br>Gene1 | U<br>Sample5<br>Gene1 |                   |   |   |   |    |    |    |
| F | U<br>Sample1<br>Gene1 | U<br>Sample2<br>Gene1 | U<br>Sample3<br>Gene1 | U<br>Sample4<br>Gene1 | U<br>Sample5<br>Gene1 |                   |   |   |   |    |    |    |
| G |                       |                       |                       |                       |                       |                   |   |   |   |    |    |    |
| H |                       |                       |                       |                       |                       |                   |   |   |   |    |    |    |

## To define the concentration values

Samples of the sample type *Standard* have a known quantity of a specific gene. By comparing the Cq values of unknown samples of the same gene to the Cq values of these known standard quantities, the unknown quantities can be estimated. When specifying samples as standards, each gene in the reaction needs to be assigned a *Concentration* value.

- 1 In the multiwell plate image, select the samples *Std1* (positions A1, B1, C1).

The screenshot shows the 'Plate View' interface of a multiwell plate editor. The plate layout is identical to the one in the previous table. Red arrows point to the 'Std1 Gene1' samples in positions A1, B1, and C1. The interface includes tabs for 'Plate View' and 'Table View', buttons for 'Visible Details' and 'Print Plate', and a 'Plate Id' field. A legend at the bottom identifies the sample types: Unknown (grey), Standard (blue), Positive control (green), Negative control (red), and Non reverse transcription control (orange).

- 2 In the *Concentration* field, type in *1000*. The concentration 1000 is assigned to the selected samples. The multiwell plate image, the corresponding tooltips, and the *Concentration* field display *[1.000 E+3]*.

The screenshot shows the 'Sample Editor' window with a multiwell plate layout. The 'Reaction Properties' panel on the right is open, showing the 'Concentration' field set to '1.000E+3'. A red arrow points to this field.

- 3 Repeat steps 1 and 2 for the following samples to define the corresponding concentrations listed below:

- ▶ Samples *Std2* (positions A2, B2, C2: concentration value *100* *[1.000 E+2]* is displayed.)
- ▶ Samples *Std3* (positions A3, B3, C3: concentration value *10* *[1.000 E+1]* is displayed.)
- ▶ Samples *Std4* (positions A4, B4, C4): concentration value *1* *[1.000 E+0]* is displayed.)
- ▶ Samples *Std5* (positions A5, B5, C5): concentration value *0.1* *[1.000 E-1]* is displayed.)

|   | 1                              | 2                                | 3                                | 4                                | 5                                | 6                 | 7 | 8 | 9 | 10 | 11 | 12 |
|---|--------------------------------|----------------------------------|----------------------------------|----------------------------------|----------------------------------|-------------------|---|---|---|----|----|----|
| A | S<br>Std1<br>Gene1<br>[1.0E+0] | S<br>Std2<br>Gene1<br>[1.0E+002] | S<br>Std3<br>Gene1<br>[1.0E+001] | S<br>Std4<br>Gene1<br>[1.0E+000] | S<br>Std5<br>Gene1<br>[1.0E-001] | -<br>Ntc<br>Gene1 |   |   |   |    |    |    |
| B | S<br>Std1<br>Gene1<br>[1.0E+0] | S<br>Std2<br>Gene1<br>[1.0E+002] | S<br>Std3<br>Gene1<br>[1.0E+001] | S<br>Std4<br>Gene1<br>[1.0E+000] | S<br>Std5<br>Gene1<br>[1.0E-001] | -<br>Ntc<br>Gene1 |   |   |   |    |    |    |
| C | S<br>Std1<br>Gene1<br>[1.0E+0] | S<br>Std2<br>Gene1<br>[1.0E+002] | S<br>Std3<br>Gene1<br>[1.0E+001] | S<br>Std4<br>Gene1<br>[1.0E+000] | S<br>Std5<br>Gene1<br>[1.0E-001] | -<br>Ntc<br>Gene1 |   |   |   |    |    |    |
| D | U<br>Sample1<br>Gene1          | U<br>Sample2<br>Gene1            | U<br>Sample3<br>Gene1            | U<br>Sample4<br>Gene1            | U<br>Sample5<br>Gene1            |                   |   |   |   |    |    |    |
| E | U<br>Sample1<br>Gene1          | U<br>Sample2<br>Gene1            | U<br>Sample3<br>Gene1            | U<br>Sample4<br>Gene1            | U<br>Sample5<br>Gene1            |                   |   |   |   |    |    |    |
| F | U<br>Sample1<br>Gene1          | U<br>Sample2<br>Gene1            | U<br>Sample3<br>Gene1            | U<br>Sample4<br>Gene1            | U<br>Sample5<br>Gene1            |                   |   |   |   |    |    |    |
| G |                                |                                  |                                  |                                  |                                  |                   |   |   |   |    |    |    |
| H |                                |                                  |                                  |                                  |                                  |                   |   |   |   |    |    |    |

Unknown Standard Positive control Negative control Non reverse transcription control

## Replicate groups

The LightCycler® 96 Application Software automatically groups samples into replicate groups, provided they have identical values for the following properties:

- ▶ Sample name
- ▶ Sample type
- ▶ Concentration
- ▶ Gene name

Each replicate group is named according to the top leftmost of the grouped samples.

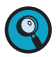

*Changing one of these properties removes the corresponding sample from the replicate group.*

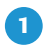

Check if the multiwell plate image displays the same replicate groups for samples with identical values.

## 1.5 Analyzing the results

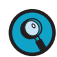

For detailed information on the 'Analysis' tab, refer to the *LightCycler® 96 System Operator's Guide*, chapter B, section "Absolute quantification".

For detailed information on working with tables and graphs, refer to the *LightCycler® 96 System Operator's Guide*, chapter B, section "General software conventions".

To analyze the calculated results of the absolute quantification application:

- ▶ Create the absolute quantification analysis, see section [Creating the analysis](#) below.
- ▶ Optional: Specify the settings for the absolute quantification analysis, see section [Analysis settings](#), on page 70.
- ▶ In the different views of the *Abs Quant* tab, check the analysis results and customize the result data if necessary:
  - ▶ For the *Amplification Curves* view, see section [Amplification curves](#), on page 71.
  - ▶ For the *Standard Curves* view, see section [Standard curve](#), on page 72.
  - ▶ For the *Heat Map* view, see section [Heat map](#), on page 73.
  - ▶ For the *Result Table* view, see section [Result table](#), on page 73.
  - ▶ For the *Cq Bars* view, see section [Cq bars](#), on page 77.

### 1.5.1 Creating the analysis

#### To create the Abs Quant analysis

- 1 Open the *Analysis* tab.
- 2 In the tool bar, choose the *Add Analysis* icon to add a new analysis.

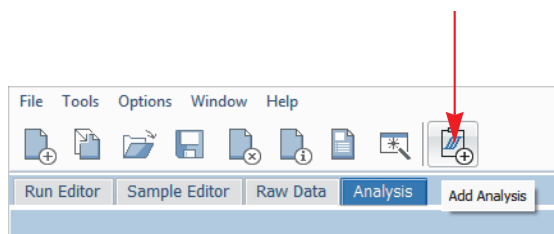

The *Create New Analysis* dialog box opens.

- 3 Choose *Abs Quant*.

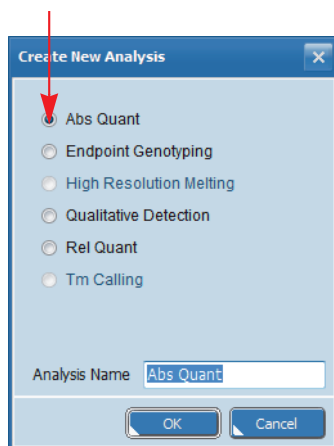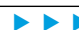

4

Choose *OK*.The *Analysis* tab displays four different views for the experiment using default values:

- ▶ *Amplification Curves*
- ▶ *Standard Curves*
- ▶ *Heat Map*
- ▶ *Result Table*

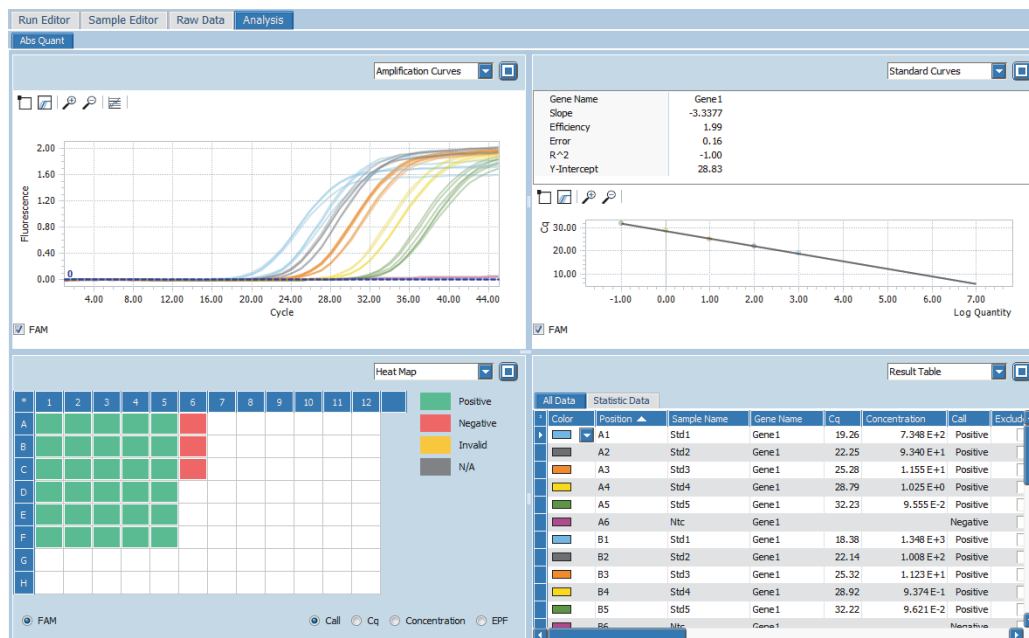

### 1.5.2 Analysis settings

#### Optional: To specify the analysis settings

- 1 In the tool bar, choose the *Analysis Settings* icon.

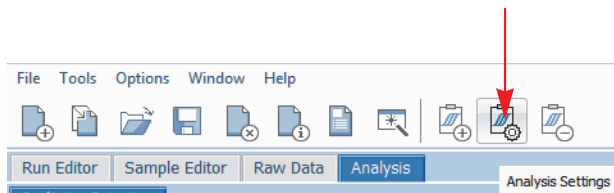

The *Abs Quant Settings* dialog box opens.

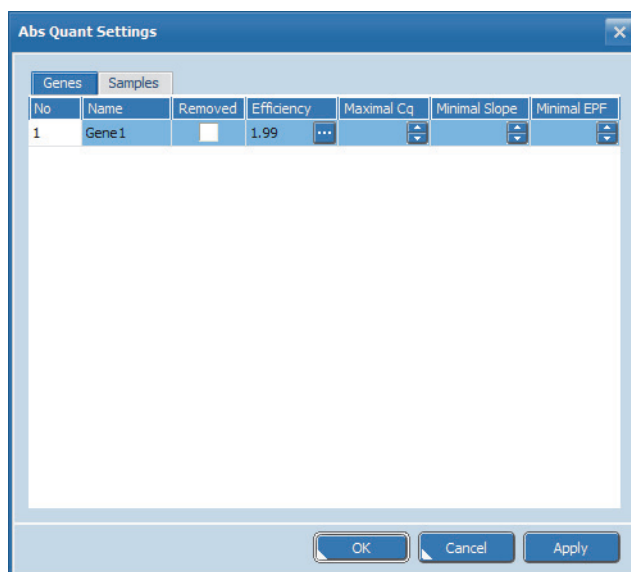

- 2 In the *Abs Quant Settings* dialog box, specify the analysis-specific settings, for example:
  - ▶ On the *Genes* tab, remove a gene from the analysis.
  - ▶ On the *Samples* tab, remove samples from the analysis.

C

### 1.5.3 Amplification curves

On the *Abs Quant* tab, amplification curves display the fluorescence intensity against the number of cycles in the amplification program. There is one curve for each sample that has a gene labeled with the selected dye.

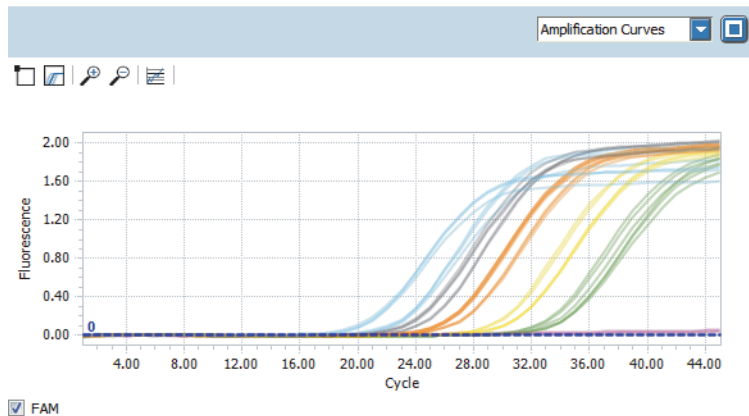

- 1 Optional: For better distinction, perform the following steps:
  - ▶ Color all curves for the standard samples in one color and the curves for the unknown samples in another. For detailed information on how to change the color of the samples, see section [To change the color of the samples](#), on page 74.
  - ▶ Modify the y axis scaling. For detailed information on how to modify the scaling of the y axis, see section [Optional: To modify the y axis scaling](#), below.
- 2 Check the *Amplification Curves* chart for correct amplification.

#### Optional: To modify the y axis scaling

- 1 Choose the *Y Axis Scaling* icon.

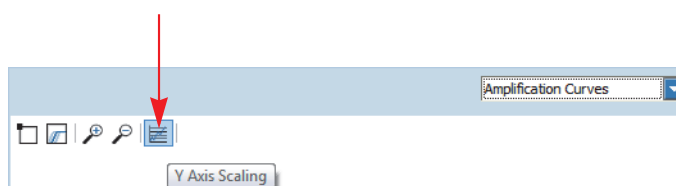

The *Axis Scaling Settings* dialog box opens.

- 2 Specify appropriate values for better distinction of the curves.
  - ▶ Choose *Manual*.
  - ▶ In *Maximum*, enter an appropriate maximum value.
  - ▶ In *Minimum*, enter an appropriate minimum value.
  - ▶ Choose *OK*.

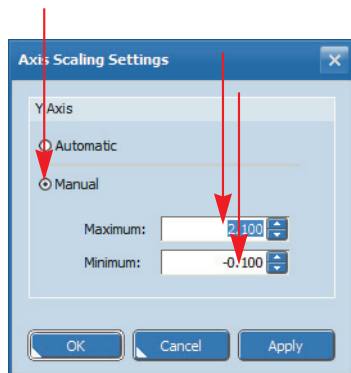

The y axis scaling changes according to the specified values.

#### 1.5.4 Standard curve

A standard curve displays a graph of Cq values against the base 10 logarithm of the quantity of each standard. For absolute quantification, the absolute values of the standard curve are used to assign quantities to unknown samples.

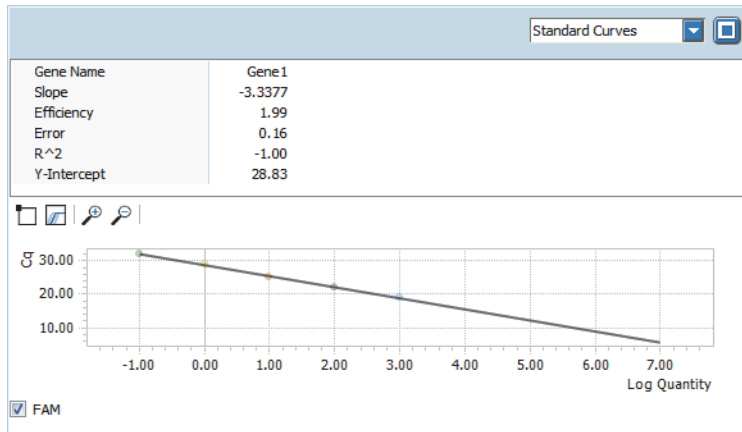

### 1.5.5 Heat map

The heat map shows an image of the multiwell plate used in the experiment for the specified channel (FAM).

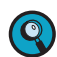

A heat map only displays the samples contained in the sample list. Samples not in the list (that is, cleared wells and removed samples and genes) are displayed in white and samples excluded from calculation are displayed in gray.

To display the sample name and the gene name for each sample, you can enlarge the heat map to fill the entire working area using the  button.

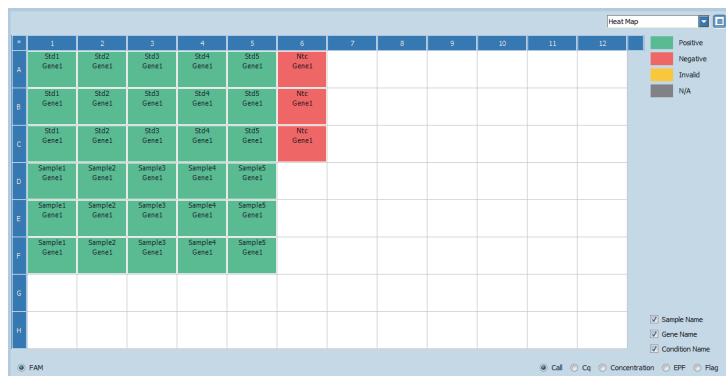

In this example the *Call* heat map is displayed. It shows the *Call* status of all samples contained in the sample list:

- ▶ The samples in columns 1 to 5 are green, that is, *Positive*.
- ▶ The NTCs in column 6 are red, that is, *Negative*.

### 1.5.6 Result table

The result table displays the calculated data results of the absolute quantification on two different tabs.

- ▶ On the *All Data* tab, all calculated data is displayed, for example, the calculated concentration of the gene present before amplification.

| Color | Position | Sample Name | Gene Name | Cq    | Concentration | Call     | E |
|-------|----------|-------------|-----------|-------|---------------|----------|---|
|       | A1       | Std1        | Gene1     | 19.26 | 7.348 E+2     | Positive |   |
|       | A2       | Std2        | Gene1     | 22.25 | 9.340 E+1     | Positive |   |
|       | A3       | Std3        | Gene1     | 25.28 | 1.155 E+1     | Positive |   |
|       | A4       | Std4        | Gene1     | 28.79 | 1.025 E+0     | Positive |   |
|       | A5       | Std5        | Gene1     | 32.23 | 9.555 E-2     | Positive |   |
|       | A6       | Ntc         | Gene1     |       |               | Negative |   |
|       | B1       | Std1        | Gene1     | 18.38 | 1.348 E+3     | Positive |   |
|       | B2       | Std2        | Gene1     | 22.14 | 1.008 E+2     | Positive |   |
|       | B3       | Std3        | Gene1     | 25.32 | 1.123 E+1     | Positive |   |

- The *Statistic Data* tab summarizes all data for samples in replicate groups.

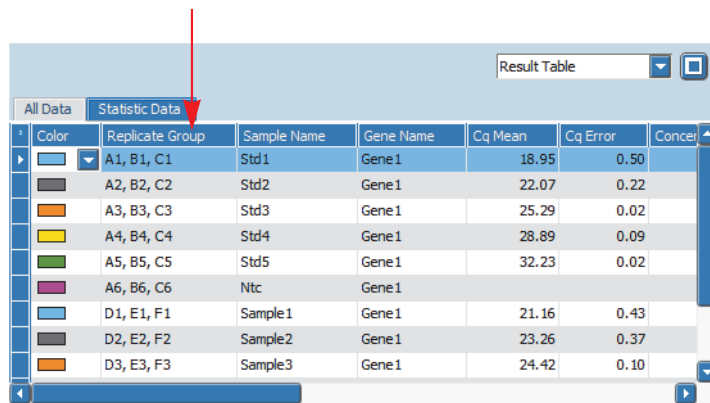

| Color      | Replicate Group | Sample Name | Gene Name | Cq Mean | Cq Error | Concentration |
|------------|-----------------|-------------|-----------|---------|----------|---------------|
| Blue       | A1, B1, C1      | Std1        | Gene1     | 18.95   | 0.50     |               |
| Grey       | A2, B2, C2      | Std2        | Gene1     | 22.07   | 0.22     |               |
| Yellow     | A3, B3, C3      | Std3        | Gene1     | 25.29   | 0.02     |               |
| Orange     | A4, B4, C4      | Std4        | Gene1     | 28.89   | 0.09     |               |
| Green      | A5, B5, C5      | Std5        | Gene1     | 32.23   | 0.02     |               |
| Purple     | A6, B6, C6      | Ntc         | Gene1     |         |          |               |
| Light Blue | D1, E1, F1      | Sample1     | Gene1     | 21.16   | 0.43     |               |
| Dark Grey  | D2, E2, F2      | Sample2     | Gene1     | 23.26   | 0.37     |               |
| Orange     | D3, E3, F3      | Sample3     | Gene1     | 24.42   | 0.10     |               |

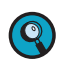

For detailed information on all calculated results displayed in the 'Result Table' view, refer to the *LightCycler® 96 System Operator's Guide*, chapter B, section "Absolute quantification".

- 1 In the *Result Table* view, check if the results show the expected dynamic range, for example, if all concentrations are positive over the complete range.
- 2 Optional: For better distinction, color all curves for the standard samples in one color and the curves for the unknown samples in another.  
For detailed information on how to change the color of the samples, see section [To change the color of the samples](#), below.

### To change the color of the samples

For better distinction, color all curves for the standard samples in one color and the curves for the unknown samples in another.

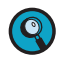

The color settings in the 'Result Table' view correspond to the color settings in the 'Amplification Curves' view.

- 1 In the *Heat Map* view, select rows A to C to select all standard samples (*Std* and *Ntc*).  
The selected standard samples are highlighted in the heat map and in the result table (*All Data* tab).

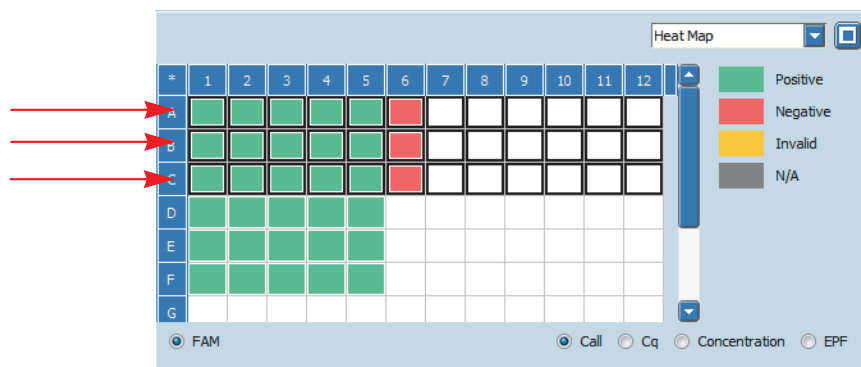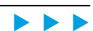

- 2 In the *Result Table* view, right-click the selected samples.

| Color | Position | Sample Name | Gene Name | Cq    | Concentration | Call     |
|-------|----------|-------------|-----------|-------|---------------|----------|
|       | A1       | Std1        | Gene1     | 19.26 | 7.348 E+2     | Positive |
|       | A2       | Std2        | Gene1     | 22.25 | 9.340 E+1     | Positive |
|       | A3       | Std3        | Gene1     | 25.28 | 1.155 E+1     | Positive |
|       | A4       | Std4        | Gene1     | 28.79 | 1.025 E+0     | Positive |
|       | A5       | Std5        | Gene1     | 32.23 | 9.555 E-2     | Positive |
|       | A6       | Ntc         | Gene1     |       |               | Negative |
|       | B1       | Std1        | Gene1     | 18.38 | 1.348 E+3     | Positive |
|       | B2       | Std2        | Gene1     | 22.14 | 1.008 E+2     | Positive |
|       | B3       | Std3        | Gene1     | 25.32 | 1.123 E+1     | Positive |

The corresponding shortcut menu opens.

- 3 On the shortcut menu, choose the down arrow next to *Color*.

| Color | Position | Sample Name | Gene Name | Cq    | Concentration | Call     |
|-------|----------|-------------|-----------|-------|---------------|----------|
|       | A1       | Std1        | Gene1     | 19.26 | 7.348 E+2     | Positive |
|       | A2       | Std2        | Gene1     | 22.25 | 9.340 E+1     | Positive |
|       | A3       | Std3        | Gene1     | 25.28 | 1.155 E+1     | Positive |
|       | A4       | Std4        | Gene1     | 28.79 | 1.025 E+0     | Positive |
|       | A5       | Std5        | Gene1     | 32.23 | 9.555 E-2     | Positive |
|       | A6       | Ntc         | Gene1     |       |               | Negative |
|       | B1       | Std1        | Gene1     | 18.38 | 1.348 E+3     | Positive |
|       | B2       | Std2        | Gene1     | 22.14 | 1.008 E+2     | Positive |
|       | B3       | Std3        | Gene1     | 25.32 | 1.123 E+1     | Positive |

The color selection dialog box opens.

- 4 Choose a color field to assign one color to all standard samples, for example, blue.

| Color | Position | Sample Name | Gene Name | Cq    | Concentration | Call     |
|-------|----------|-------------|-----------|-------|---------------|----------|
|       | A1       | Std1        | Gene1     | 19.26 | 7.348 E+2     | Positive |
|       | A2       | Std2        | Gene1     | 22.25 | 9.340 E+1     | Positive |
|       | A3       | Std3        | Gene1     | 25.28 | 1.155 E+1     | Positive |
|       | A4       | Std4        | Gene1     | 28.79 | 1.025 E+0     | Positive |
|       | A5       | Std5        | Gene1     | 32.23 | 9.555 E-2     | Positive |
|       | A6       | Ntc         | Gene1     |       |               | Negative |
|       | B1       | Std1        | Gene1     | 18.38 | 1.348 E+3     | Positive |
|       | B2       | Std2        | Gene1     | 22.14 | 1.008 E+2     | Positive |
|       | B3       | Std3        | Gene1     | 25.32 | 1.123 E+1     | Positive |

The color for the standard samples changes in the *Result Table* view and in the *Amplification Curves* view.

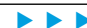

- 5 Repeat steps 1 to 4 for the unknown samples in rows D to F. For example, assign red to all unknown samples.

The *Amplification Curves* chart and the *Result Table* view are customized accordingly:

- ▶ Standard samples are colored blue.
- ▶ Unknown samples are colored red.

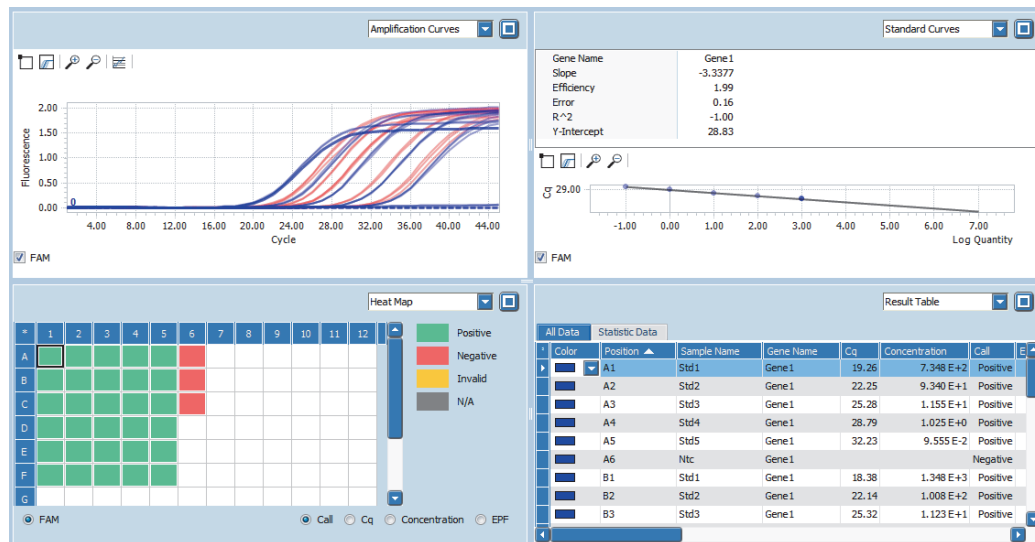

C

### 1.5.7 Cq bars

The *Cq Bars* chart shows the same Cq data as the result table, but in a bar chart format. Each bar represents a Cq value. The *Cq Bars* chart shows the corresponding Cq for each gene and each sample.

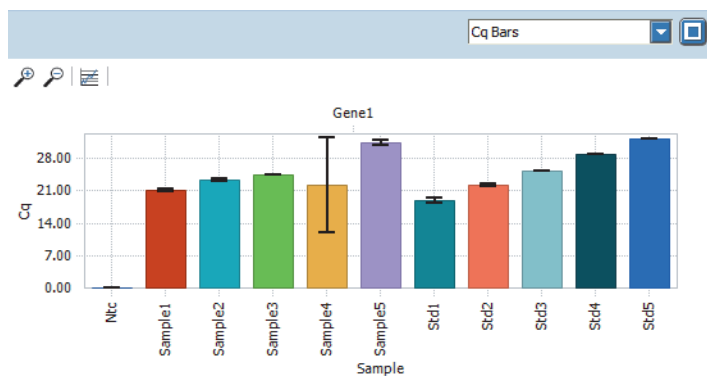

- Optional: For better distinction, customize the y axis scaling. For detailed information on how to modify the scaling of the y axis, see section [Optional: To modify the y axis scaling](#), on page 71

## 1.6 Exporting result data

You can export the following result data to Microsoft Word or Excel:

- ▶ The result table as a text file.
- ▶ The result graphs as a PNG file, GIF file, or text file.

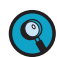

For detailed information on how to export result data, refer to the *LightCycler® 96 System Operator's Guide*, chapter B, section "Exporting analysis results".

## 2 Endpoint SNP genotyping

Endpoint SNP genotyping assays use hydrolysis probes for single-nucleotide polymorphism (SNP) genotyping. Two sequence-specific probes detect the wild type and mutant alleles. Each is labeled with different reporter dyes, most frequently with a FAM dye and a VIC dye. Fluorescence data are collected using PCR. To identify genotypes, only endpoint fluorescence intensities of the two reporter dyes are used. Relative dye intensities discriminate between homozygous for allele x, homozygous for allele y, and heterozygous alleles.

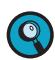

For detailed information, refer to the *LightCycler® 96 System Operator's Guide*, chapter A, sections "Detection formats" and "Endpoint genotyping analysis".

### 2.1 Experiment overview

The following example describes how to set up, run, and analyze a dual-color endpoint SNP genotyping assay.

The assay is performed using a LightCycler® 480 Multiwell Plate 96, white.

|          |                                                                                                                                                                                                                                                          |
|----------|----------------------------------------------------------------------------------------------------------------------------------------------------------------------------------------------------------------------------------------------------------|
| Samples  | 46 human genomic DNA samples, isolated with the MagNA Pure LC 2.0 Instrument (concentration approximately 90 ng/μl)                                                                                                                                      |
| Reagents | <ul style="list-style-type: none"> <li>▶ FastStart Essential DNA Probes Master (2 x conc.)</li> <li>▶ Genotyping mix (40 x conc.), containing forward primer, reverse primer, and two hydrolysis probes labeled with FAM and VIC respectively</li> </ul> |

### 2.2 Setting up the samples

To set up the samples:

- ▶ Set up the sample dilutions, see section [Sample dilution](#) below.
- ▶ Include a no template control (NTC), see section [Controls](#) below.
- ▶ Prepare the PCR mix, see section [PCR mix](#), on page 79.
- ▶ Pipette the sample dilution and the PCR mix, see section [Pipetting scheme](#), on page 79.
- ▶ Centrifuge the multiwell plate, see section [Centrifugation](#), on page 79

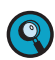

Continuously cool the samples and PCR mix during setup by keeping the reaction tubes on ice.

#### Sample dilution

The human genomic DNA samples (concentration approximately 90 ng/μl) are diluted to a consistent concentration of 5 ng/5 μl.

#### Controls

To ensure an accurate endpoint genotyping analysis, it is highly recommended that you include a no template control (NTC) in your experiment.

**PCR mix**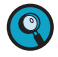

When setting up the PCR mix, compensate for pipetting losses. We recommend preparing PCR mixes with 10% extra volume.

The table below shows the components included in the PCR mix for one 20 µl reaction. The PCR mix volume is 15 µl for a subsequent sample input of 5 µl per reaction.

| Component                                | Concentration | Volume       | Final conc. |
|------------------------------------------|---------------|--------------|-------------|
| Water, PCR grade                         |               | 4.5 µl       |             |
| FastStart Essential DNA Probes Master    | 2 x conc.     | 10 µl        | 1 x conc.   |
| Genotyping mix                           | 40 x conc.    | 0.5 µl       | 1 x conc.   |
| <b>Total volume (without sample DNA)</b> |               | <b>15 µl</b> |             |

**Pipetting scheme**

- 1 Pipette 15 µl of the PCR mix into 48 wells of the multiwell plate according to the following scheme.
- 2 Pipette 5 µl of sample dilution in the PCR mix into each well.
- 3 For the two NTCs, pipette 5 µl of water (instead of DNA sample) into the corresponding wells, according to the following scheme.

|   | 1     | 2     | 3     | 4     | 5     | 6     | 7 | 8 | 9 | 10 | 11 | 12 |
|---|-------|-------|-------|-------|-------|-------|---|---|---|----|----|----|
| A | DNA1  | DNA2  | DNA3  | DNA4  | DNA5  | DNA6  |   |   |   |    |    |    |
| B | DNA7  | DNA8  | DNA9  | DNA10 | DNA11 | DNA12 |   |   |   |    |    |    |
| C | DNA13 | DNA14 | DNA15 | DNA16 | DNA17 | DNA18 |   |   |   |    |    |    |
| D | DNA19 | DNA20 | DNA21 | DNA22 | DNA23 | DNA24 |   |   |   |    |    |    |
| E | DNA25 | DNA26 | DNA27 | DNA28 | DNA29 | DNA30 |   |   |   |    |    |    |
| F | DNA31 | DNA32 | DNA33 | DNA34 | DNA35 | DNA36 |   |   |   |    |    |    |
| G | DNA37 | DNA38 | DNA39 | DNA40 | DNA41 | DNA42 |   |   |   |    |    |    |
| H | DNA43 | DNA44 | DNA45 | DNA46 | NTC   | NTC   |   |   |   |    |    |    |

**Centrifugation**

- 1 Seal the multiwell plate with the LightCycler® 480 Sealing Foil using the sealing foil applicator (provided with the system package).
- 2 Centrifuge the multiwell plate at 1500 x g for 2 minutes in a standard swing-bucket centrifuge, using a rotor for multiwell plates.

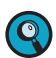

Make sure you balance the multiwell plate with a suitable counterweight (for example, another multiwell plate).

## 2.3 Experiment run parameters

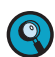

For detailed information on how to program an experiment, see one of the following sections:

[Programming the experiment with the LightCycler® 96 Application Software](#), on page 20.

[Programming the experiment with the LightCycler® 96 Instrument Software](#), on page 32.

For this experiment, a standard PCR profile for hydrolysis probes is used. The experiment includes the run parameters for the temperature profile, the detection format, and the reaction volume. These parameters are listed in the following tables.

### Temperature profile

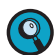

For detailed information on how to program a temperature profile, see one of the following sections:

For working with the LightCycler® 96 Application Software: [Creating the temperature profile](#), on page 23.

For working with the LightCycler® 96 Instrument Software: [Creating the temperature profile](#), on page 35.

For this example, use the following heating and cooling cycles:

| Programs             |                  | Steps       |              |             |                  |
|----------------------|------------------|-------------|--------------|-------------|------------------|
| Name                 | Number of cycles | Ramp (°C/s) | Duration (s) | Target (°C) | Acquisition Mode |
| Preincubation        | 1                | 4.4         | 600          | 95          | None             |
| 2-step amplification | 45               | 4.4         | 10           | 95          | None             |
|                      |                  | 2.2         | 60           | 60          | Single           |
| Cooling              | 1                | 2.2         | 30           | 37          | None             |

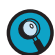

It is not necessary to add a separate cooling program at the end of the run. At the end of each run, the samples are automatically cooled to +37°C.

For the ramp rate for heating and cooling (*Ramp* (°C/s)), the default values are used in this example.

For the steps of the amplification program, the following default settings are used in this example:

- ▶ LightCycler® 96 Application Software: For *Gradient* and *Touch down*, the default settings are used.
- ▶ For *Mode*, the default *Standard* option is used.

In the *Temperature Profile* window area, the following graphical summary of the programs selected for the experiment and their temperature and time settings is displayed.

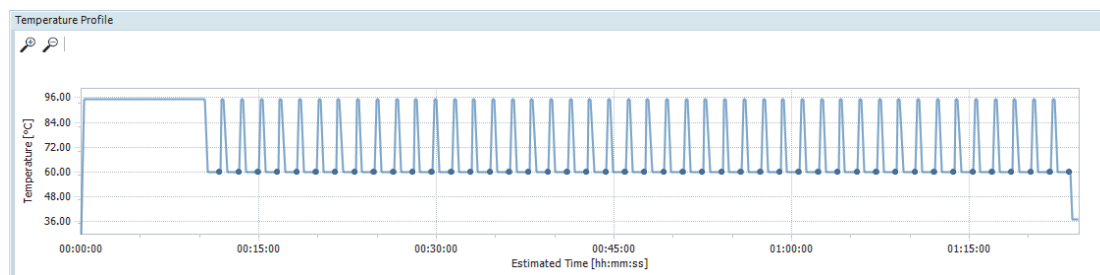

## Detection format

Selecting the dyes FAM and VIC for this dual-color experiment determines the channel combination for the measurement during the run. For all other parameters, the default values are used in this example.



For detailed information on how to specify the detection format, see the following sections:

For working with the LightCycler® 96 Application Software: [To specify the detection format for the experiment](#), on page 27.

For working with the LightCycler® 96 Instrument Software: [To specify the detection format for the experiment](#), on page 40.

For this example, use the following channel combination:

| Dye | Channel |
|-----|---------|
| FAM | 470/514 |
| VIC | 533/572 |

## Reaction volume

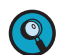

As the LightCycler® 96 Instrument does not validate the reaction volume, ensure that the specified reaction volume matches the volume pipetted into the wells of the multiwell plate.

For detailed information on how to specify the reaction volume, see one of the following sections:

For working with the LightCycler® 96 Application Software: [To specify the reaction volume for the experiment](#), on page 27.

For working with the LightCycler® 96 Instrument Software: [To specify the reaction volume for the experiment](#), on page 42.

For this example, use the following reaction volume:

| Reaction volume |
|-----------------|
| 20 µl           |

## Experiment run

Once you have set up the samples and defined the experiment run parameters, you can start the run. For detailed information on how to run the experiment, see section [Running the experiment](#), on page 43.

## 2.4 Editing the sample data

For editing the sample data, the experiment must be opened in the LightCycler® 96 Application Software. You can edit the sample list before or after the run, depending on your preferred routine.

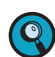

*The LightCycler® 96 Application Software offers two different views for editing the samples: the plate view and the table view. This user training guide describes how to edit the samples using the plate view, which shows the samples in 96 wells laid out to match the physical instrument. Changes in the plate view are immediately displayed in the table view and vice versa.*

*For detailed information on the 'Sample Editor' tab, refer to the LightCycler® 96 System Operator's Guide, chapter B, section "Sample Editor tab".*

To edit the sample list:

- ▶ Clear empty wells to eliminate them from the analysis, see section [Empty wells](#) below.
- ▶ Edit the sample names, see section [Sample names](#), on page 83.
- ▶ Edit the sample types, see section [Sample types](#), on page 84.
- ▶ Assign a gene for each dye, see section [Gene assignment](#), on page 85.

### Empty wells

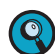

*For detailed information on how to clear empty wells, see section [To clear empty wells](#), on page 51.*

For this example, clear the wells in columns 7 to 12 (see also the multiwell plate image below).

|   | 1                      | 2                      | 3                      | 4                      | 5                      | 6                      | 7 | 8 | 9 | 10 | 11 | 12 |
|---|------------------------|------------------------|------------------------|------------------------|------------------------|------------------------|---|---|---|----|----|----|
| A | U<br>Sample 1<br>None  | U<br>Sample 2<br>None  | U<br>Sample 3<br>None  | U<br>Sample 4<br>None  | U<br>Sample 5<br>None  | U<br>Sample 6<br>None  |   |   |   |    |    |    |
| B | U<br>Sample 13<br>None | U<br>Sample 14<br>None | U<br>Sample 15<br>None | U<br>Sample 16<br>None | U<br>Sample 17<br>None | U<br>Sample 18<br>None |   |   |   |    |    |    |
| C | U<br>Sample 25<br>None | U<br>Sample 26<br>None | U<br>Sample 27<br>None | U<br>Sample 28<br>None | U<br>Sample 29<br>None | U<br>Sample 30<br>None |   |   |   |    |    |    |
| D | U<br>Sample 37<br>None | U<br>Sample 38<br>None | U<br>Sample 39<br>None | U<br>Sample 40<br>None | U<br>Sample 41<br>None | U<br>Sample 42<br>None |   |   |   |    |    |    |
| E | U<br>Sample 49<br>None | U<br>Sample 50<br>None | U<br>Sample 51<br>None | U<br>Sample 52<br>None | U<br>Sample 53<br>None | U<br>Sample 54<br>None |   |   |   |    |    |    |
| F | U<br>Sample 61<br>None | U<br>Sample 62<br>None | U<br>Sample 63<br>None | U<br>Sample 64<br>None | U<br>Sample 65<br>None | U<br>Sample 66<br>None |   |   |   |    |    |    |
| G | U<br>Sample 73<br>None | U<br>Sample 74<br>None | U<br>Sample 75<br>None | U<br>Sample 76<br>None | U<br>Sample 77<br>None | U<br>Sample 78<br>None |   |   |   |    |    |    |
| H | U<br>Sample 85<br>None | U<br>Sample 86<br>None | U<br>Sample 87<br>None | U<br>Sample 88<br>None | U<br>Sample 89<br>None | U<br>Sample 90<br>None |   |   |   |    |    |    |

## Sample names

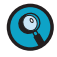

For detailed information on how to edit the sample names, see section [To edit the sample names and the sample types](#), on page 53.

For this example, the following sample names apply (see also the multiwell plate image below):

| Name            | Samples in the plate view                   |
|-----------------|---------------------------------------------|
| DNA 1 to DNA 46 | For the unknown samples in rows A to H      |
| NTC             | For the negative control in wells H5 and H6 |

|   | 1              | 2              | 3              | 4              | 5              | 6              | 7 | 8 | 9 | 10 | 11 | 12 |
|---|----------------|----------------|----------------|----------------|----------------|----------------|---|---|---|----|----|----|
| A | DNA 1<br>None  | DNA 2<br>None  | DNA 3<br>None  | DNA 4<br>None  | DNA 5<br>None  | DNA 6<br>None  |   |   |   |    |    |    |
| B | DNA 7<br>None  | DNA 8<br>None  | DNA 9<br>None  | DNA 10<br>None | DNA 11<br>None | DNA 12<br>None |   |   |   |    |    |    |
| C | DNA 13<br>None | DNA 14<br>None | DNA 15<br>None | DNA 16<br>None | DNA 17<br>None | DNA 18<br>None |   |   |   |    |    |    |
| D | DNA 19<br>None | DNA 20<br>None | DNA 21<br>None | DNA 22<br>None | DNA 23<br>None | DNA 24<br>None |   |   |   |    |    |    |
| E | DNA 25<br>None | DNA 26<br>None | DNA 27<br>None | DNA 28<br>None | DNA 29<br>None | DNA 30<br>None |   |   |   |    |    |    |
| F | DNA 31<br>None | DNA 32<br>None | DNA 33<br>None | DNA 34<br>None | DNA 35<br>None | DNA 36<br>None |   |   |   |    |    |    |
| G | DNA 37<br>None | DNA 38<br>None | DNA 39<br>None | DNA 40<br>None | DNA 41<br>None | DNA 42<br>None |   |   |   |    |    |    |
| H | DNA 43<br>None | DNA 44<br>None | DNA 45<br>None | DNA 46<br>None | NTC<br>None    | NTC<br>None    |   |   |   |    |    |    |

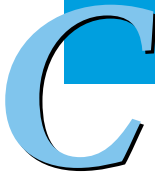

## Sample types



For detailed information on how to edit the sample types, see section [To edit the sample names and the sample types](#), on page 53.

In this example the following sample types apply (see also the multiwell plate image below):

| Type              | Samples in the plate view                     |
|-------------------|-----------------------------------------------|
| Unknown (default) | For the samples <i>DNA 1</i> to <i>DNA 46</i> |
| Negative control  | For the samples <i>NTC</i>                    |

|   | 1                           | 2                           | 3                           | 4                           | 5                           | 6                           | 7 | 8 | 9 | 10 | 11 | 12 |
|---|-----------------------------|-----------------------------|-----------------------------|-----------------------------|-----------------------------|-----------------------------|---|---|---|----|----|----|
| A | U<br>DNA 1<br>None<br>None  | U<br>DNA 2<br>None<br>None  | U<br>DNA 3<br>None<br>None  | U<br>DNA 4<br>None<br>None  | U<br>DNA 5<br>None<br>None  | U<br>DNA 6<br>None<br>None  |   |   |   |    |    |    |
| B | U<br>DNA 7<br>None<br>None  | U<br>DNA 8<br>None<br>None  | U<br>DNA 9<br>None<br>None  | U<br>DNA 10<br>None<br>None | U<br>DNA 11<br>None<br>None | U<br>DNA 12<br>None<br>None |   |   |   |    |    |    |
| C | U<br>DNA 13<br>None<br>None | U<br>DNA 14<br>None<br>None | U<br>DNA 15<br>None<br>None | U<br>DNA 16<br>None<br>None | U<br>DNA 17<br>None<br>None | U<br>DNA 18<br>None<br>None |   |   |   |    |    |    |
| D | U<br>DNA 19<br>None<br>None | U<br>DNA 20<br>None<br>None | U<br>DNA 21<br>None<br>None | U<br>DNA 22<br>None<br>None | U<br>DNA 23<br>None<br>None | U<br>DNA 24<br>None<br>None |   |   |   |    |    |    |
| E | U<br>DNA 25<br>None<br>None | U<br>DNA 26<br>None<br>None | U<br>DNA 27<br>None<br>None | U<br>DNA 28<br>None<br>None | U<br>DNA 29<br>None<br>None | U<br>DNA 30<br>None<br>None |   |   |   |    |    |    |
| F | U<br>DNA 31<br>None<br>None | U<br>DNA 32<br>None<br>None | U<br>DNA 33<br>None<br>None | U<br>DNA 34<br>None<br>None | U<br>DNA 35<br>None<br>None | U<br>DNA 36<br>None<br>None |   |   |   |    |    |    |
| G | U<br>DNA 37<br>None<br>None | U<br>DNA 38<br>None<br>None | U<br>DNA 39<br>None<br>None | U<br>DNA 40<br>None<br>None | U<br>DNA 41<br>None<br>None | U<br>DNA 42<br>None<br>None |   |   |   |    |    |    |
| H | U<br>DNA 43<br>None<br>None | U<br>DNA 44<br>None<br>None | U<br>DNA 45<br>None<br>None | U<br>DNA 46<br>None<br>None | NTC<br>None<br>None         | NTC<br>None<br>None         |   |   |   |    |    |    |

Unknown
Standard
Positive control
Negative control
Non reverse transcription control

## Gene assignment

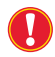

For endpoint genotyping analysis, it is essential to define identical gene names for both dyes. In case of different gene names, no endpoint genotyping analysis is possible.

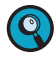

For detailed information on how to assign a gene to the dye, see section [To assign a gene to the dye\(s\)](#), on page 55.

In this example the following gene assignment applies:

| Gene name | Dye | Samples in the plate view |
|-----------|-----|---------------------------|
| Gene 1    | FAM | For all the samples       |
| Gene 1    | VIC | For all the samples       |

|   | 1                     | 2                     | 3                     | 4                     | 5                     | 6                     | 7 | 8 | 9 | 10 | 11 | 12 |
|---|-----------------------|-----------------------|-----------------------|-----------------------|-----------------------|-----------------------|---|---|---|----|----|----|
| A | U<br>DNA 1<br>Gene 1  | U<br>DNA 2<br>Gene 1  | U<br>DNA 3<br>Gene 1  | U<br>DNA 4<br>Gene 1  | U<br>DNA 5<br>Gene 1  | U<br>DNA 6<br>Gene 1  |   |   |   |    |    |    |
| B | U<br>DNA 7<br>Gene 1  | U<br>DNA 8<br>Gene 1  | U<br>DNA 9<br>Gene 1  | U<br>DNA 10<br>Gene 1 | U<br>DNA 11<br>Gene 1 | U<br>DNA 12<br>Gene 1 |   |   |   |    |    |    |
| C | U<br>DNA 13<br>Gene 1 | U<br>DNA 14<br>Gene 1 | U<br>DNA 15<br>Gene 1 | U<br>DNA 16<br>Gene 1 | U<br>DNA 17<br>Gene 1 | U<br>DNA 18<br>Gene 1 |   |   |   |    |    |    |
| D | U<br>DNA 19<br>Gene 1 | U<br>DNA 20<br>Gene 1 | U<br>DNA 21<br>Gene 1 | U<br>DNA 22<br>Gene 1 | U<br>DNA 23<br>Gene 1 | U<br>DNA 24<br>Gene 1 |   |   |   |    |    |    |
| E | U<br>DNA 25<br>Gene 1 | U<br>DNA 26<br>Gene 1 | U<br>DNA 27<br>Gene 1 | U<br>DNA 28<br>Gene 1 | U<br>DNA 29<br>Gene 1 | U<br>DNA 30<br>Gene 1 |   |   |   |    |    |    |
| F | U<br>DNA 31<br>Gene 1 | U<br>DNA 32<br>Gene 1 | U<br>DNA 33<br>Gene 1 | U<br>DNA 34<br>Gene 1 | U<br>DNA 35<br>Gene 1 | U<br>DNA 36<br>Gene 1 |   |   |   |    |    |    |
| G | U<br>DNA 37<br>Gene 1 | U<br>DNA 38<br>Gene 1 | U<br>DNA 39<br>Gene 1 | U<br>DNA 40<br>Gene 1 | U<br>DNA 41<br>Gene 1 | U<br>DNA 42<br>Gene 1 |   |   |   |    |    |    |
| H | U<br>DNA 43<br>Gene 1 | U<br>DNA 44<br>Gene 1 | U<br>DNA 45<br>Gene 1 | U<br>DNA 46<br>Gene 1 | -<br>NTC<br>Gene 1    | -<br>NTC<br>Gene 1    |   |   |   |    |    |    |

C

## 2.5 Analyzing the results

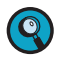

For detailed information on the 'Analysis' tab, refer to the *LightCycler® 96 System Operator's Guide*, chapter B, section "Endpoint genotyping".

For detailed information on working with tables and graphs, refer to the *LightCycler® 96 System Operator's Guide*, chapter B, section "General software conventions".

To analyze the calculated results of the endpoint genotyping application:

- ▶ Create the endpoint genotyping analysis, see section [Creating the analysis](#) below.
- ▶ Optional: Specify the genotyping settings, see section [Analysis settings](#), on page 88.
- ▶ In the different views of the *Analysis* tab, check the analysis results and customize the result data if necessary:
  - ▶ In the *Amplification Curves* view, check the curves for plausibility, see section [To check the amplification curves](#), on page 89.
  - ▶ In the *Scatter Plot* view, define the angle settings and thresholds for Gene 1, see section [To define the angle settings and thresholds for Gene 1](#), on page 91.
  - ▶ For the *Heat Map* view, see section [Heat map](#), on page 93.
  - ▶ In the *Result Table* view:
    - Rename the genotypes, see section [Optional: To rename a genotype](#), on page 94.
    - Filter the results, see section [Optional: To filter the results](#), on page 95.
    - Change the color of the samples, see section [Optional: To change the color of the samples](#), on page 96.

### 2.5.1 Creating the analysis

#### To create the endpoint genotyping analysis

- 1 Open the *Analysis* tab.
- 2 In the tool bar, choose the *Add Analysis* icon to add a new analysis.

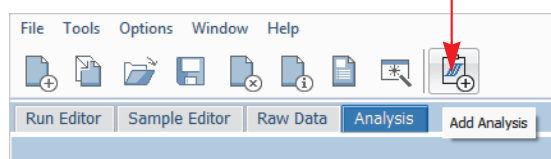

The *Create New Analysis* dialog box opens.

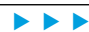

### 3 Choose *Endpoint Genotyping*.

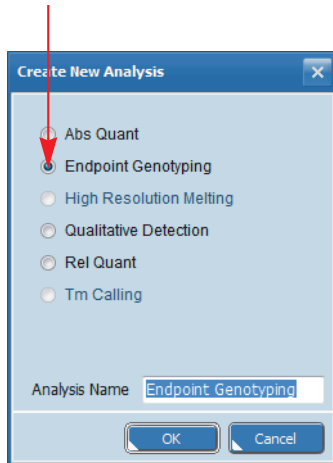

### 4 Choose *OK*.

The *Analysis* tab displays four different views for the experiment using default values:

- ▶ *Amplification Curves*
- ▶ *Scatter Plot*
- ▶ *Heat Map*
- ▶ *Result Table*

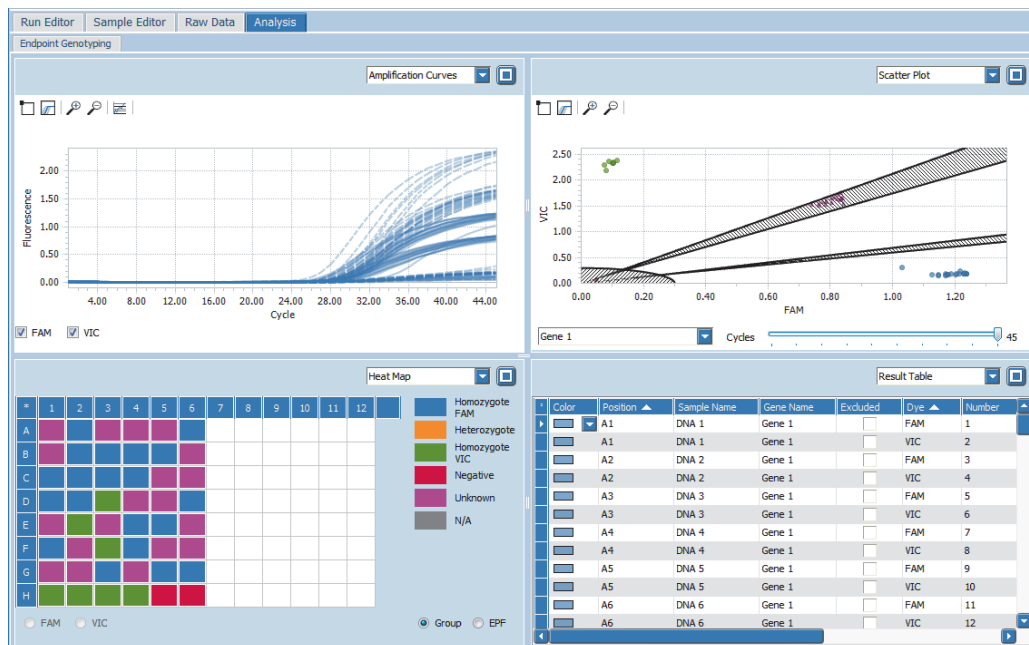

## 2.5.2 Analysis settings

### Optional: To specify the analysis settings

- 1 In the tool bar, choose the *Analysis Settings* icon.

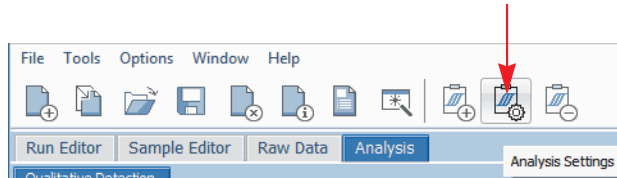

The *Endpoint Genotyping Settings* dialog box opens.

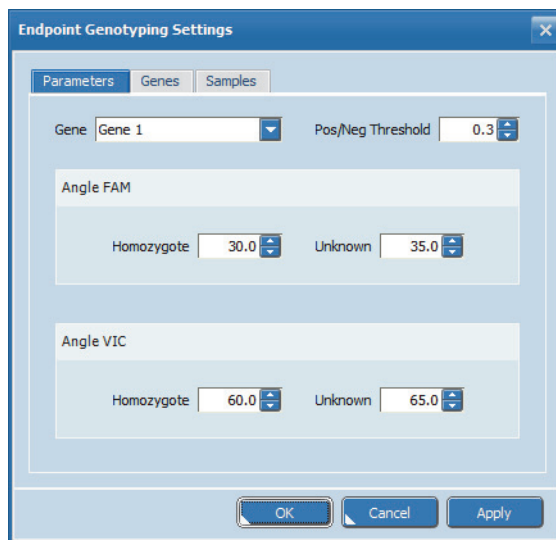

- 2 In the *Endpoint Genotyping Settings* dialog box, specify the analysis-specific settings, for example:
  - ▶ On the *Parameters* tab, specify the threshold and angle settings for Gene 1.

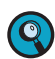

*The threshold and angle settings in the 'Endpoint Genotyping Settings' dialog box correspond to the slider settings in the scatter plot view. For detailed information, see section [Scatter plot](#), on page 91.*

- ▶ On the *Genes* tab, exclude genes.
- ▶ On the *Samples* tab, exclude samples.

### 2.5.3 Amplification curves

The *Amplification Curves* chart displays the fluorescence intensity against the number of cycles in an amplification program. There is one curve for each sample that has a gene labeled with the selected dye.

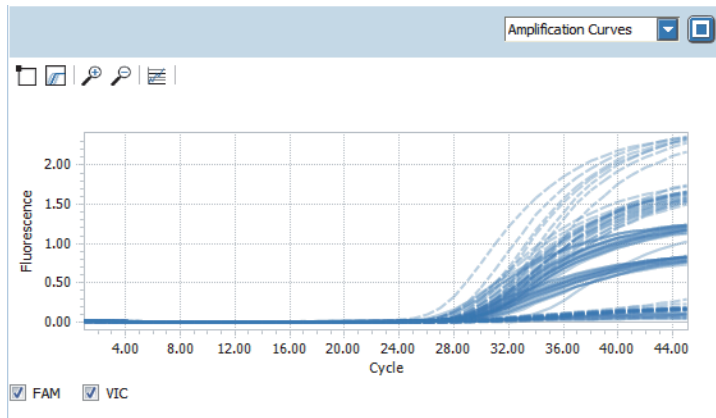

#### To check the amplification curves

- 1 Optional: Change the color of the samples to distinguish the corresponding amplification curves from each other.  
For detailed information on how to change the color of the samples, see section [Optional: To change the color of the samples](#), on page 96.
- 2 Optional: For better distinction, modify the y axis scaling.  
For detailed information on how to modify the scaling of the y axis, see section [Optional: To modify the y axis scaling](#), on page 71.
- 3 Check the *Amplification Curves* chart for correct amplification.
- 4 Check if you can identify the three different groups of genotypes: Homozygote: FAM, Homozygote: VIC, and Heterozygote for the respective channels FAM and VIC.
- 5 Clear the *FAM* check box to display only the curves for each sample that has a gene labeled with the VIC dye.

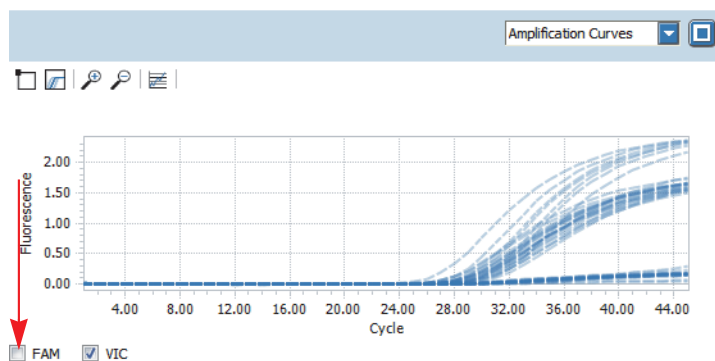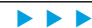

- 6 Select the *FAM* check box again and clear the *VIC* check box to display only the curves for each sample that has a gene label with the FAM dye.

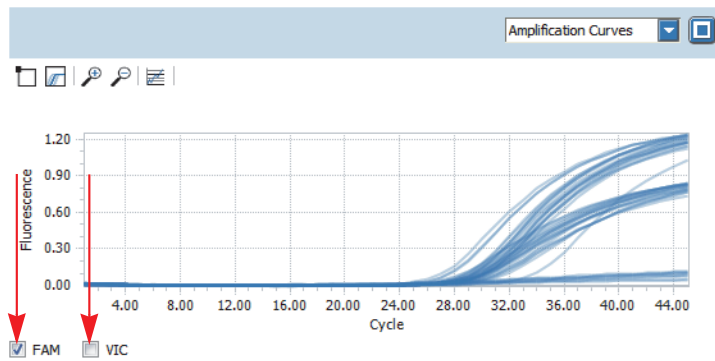

C

### 2.5.4 Scatter plot

The *Scatter Plot* chart displays the endpoint fluorescence of the two selected dyes (representing the two alleles). Each point represents a sample, whose x-coordinate is the endpoint fluorescence level of FAM, and whose y-coordinate is the endpoint fluorescence level of VIC.

#### To define the angle settings and thresholds for Gene 1

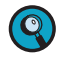

The slider settings on the scatter plot correspond to the threshold and angle settings in the 'Endpoint Genotyping Settings' dialog box.

- 1 In the *Scatter Plot* view, set the sliders manually to classify the following three different groups of genotypes:
  - ▶ Homozygote: FAM
  - ▶ Homozygote: VIC
  - ▶ Heterozygote
- 2 To specify the area for *Homozygote: FAM*, drag the lowermost slider to the appropriate location: Any points below the lowermost slider are classified as *Homozygote: FAM*.

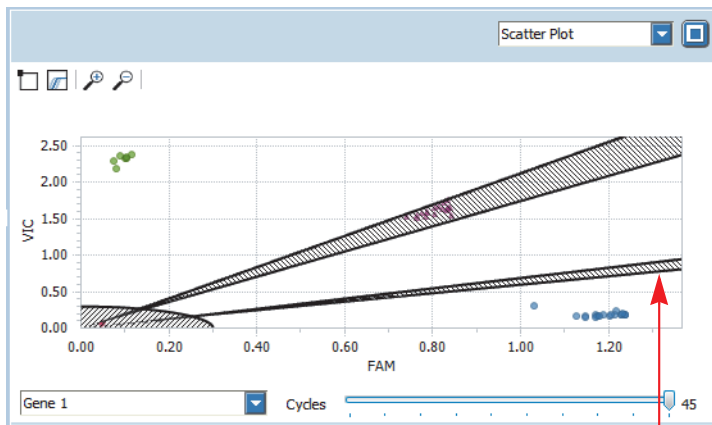

- 3 To specify the area for *Homozygote: VIC*, drag the uppermost slider accordingly: Any points above the uppermost slider are classified as *Homozygote: VIC*.

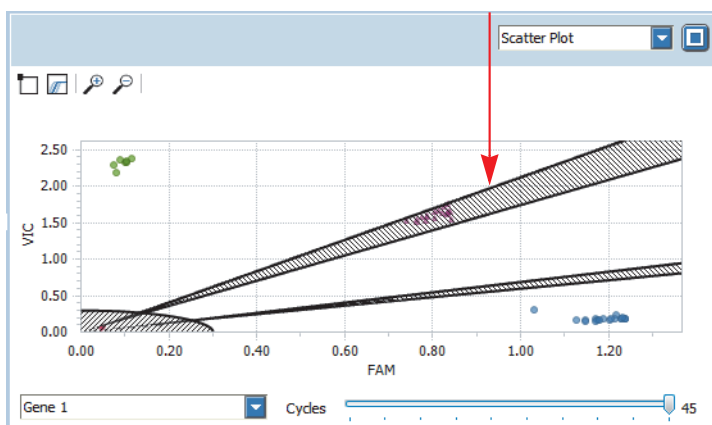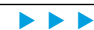

- 4 To specify the areas for unknown samples and to limit the area for heterozygote samples, drag the inner sliders accordingly:
- ▶ Any points in the shaded areas are classified as *Unknown*.
  - ▶ Any points between the shaded areas are classified as *Heterozygote*.

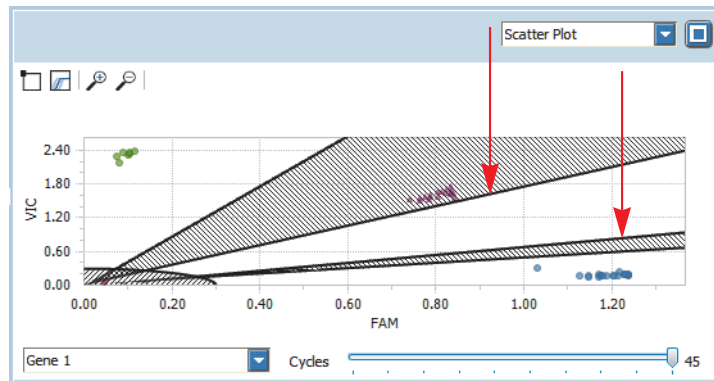

The *Scatter Plot* chart and the *Heat Map* are displayed according to the defined angles.

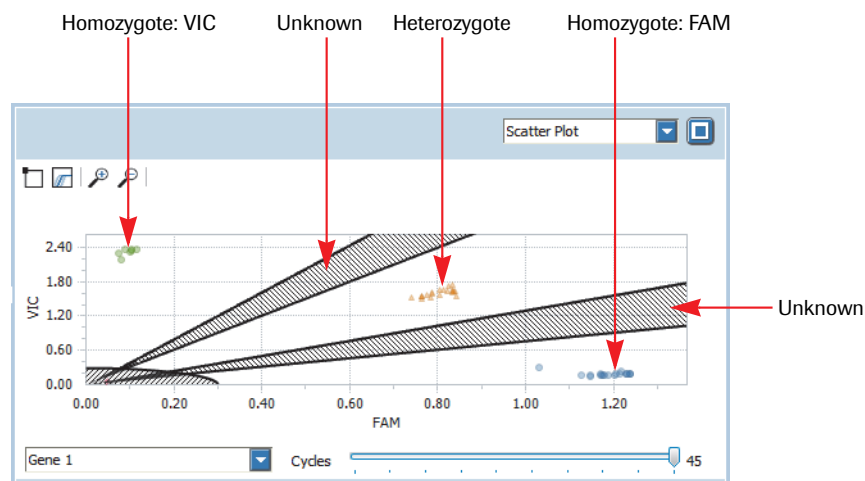

- 5 Check if the NTCs are in the *Pos/Neg Threshold* radius. In this example, keep the default value for the *Pos/Neg Threshold* radius.

The *Scatter Plot* chart and the *Heat Map* are displayed according to the defined threshold and angles.

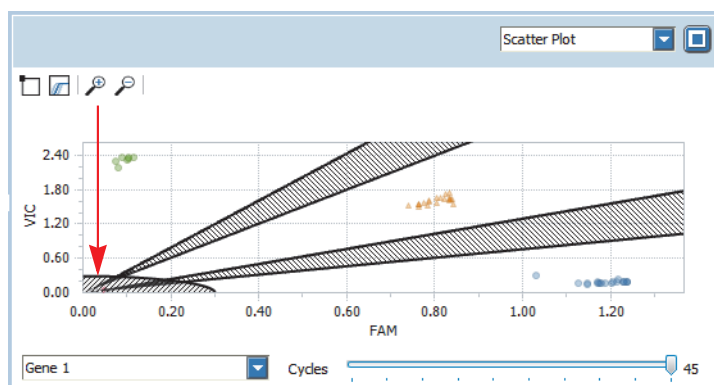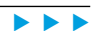

- 6 Optional: Drag the *Cycles* slider to select a particular cycle as the basis for the fluorescence value display.

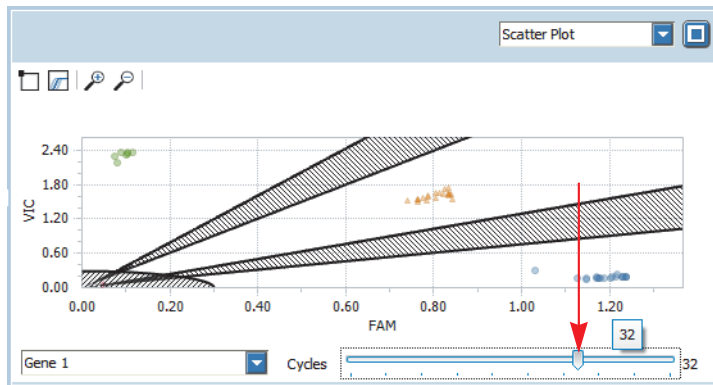

The scatter plot chart changes accordingly.

## 2.5.5 Heat map

The heat map shows an image of the multiwell plate used in the experiment for the specified gene.

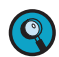

The name settings of the genotypes in the 'Heat Map' view correspond to the name settings in the 'Result Table' view.

To display the sample name and the gene name for each sample, you can enlarge the heat map to fill the entire working area using the  button.

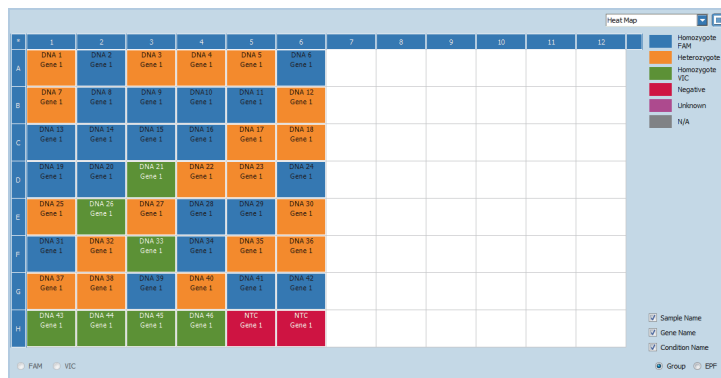

In this example the *Group* heat map is displayed. For all samples contained in the sample list, it shows the genotype the sample is assigned to, according to the threshold and angle settings.

- ▶ Blue: *Homozygote FAM*
- ▶ Orange: *Heterozygote*
- ▶ Green: *Homozygote VIC*

## 2.5.6 Result table

The result table displays the results of the endpoint genotyping analysis.

To customize the results:

- ▶ Rename the genotypes, see section *Optional: To rename a genotype* below.
- ▶ Filter the results, see section *Optional: To filter the results*, on page 95.
- ▶ Change the color of the samples, see section *Optional: To change the color of the samples*, on page 96.

**Optional: To rename a genotype**

The name settings of the genotypes in the 'Result Table' view correspond to the name settings in the 'Heat Map' view.

- 1 In the *Result Table* view, select the genotype that you want to rename, for example, *Heterozygote*.

|  | Excluded                 | Dye ▲ | Number | EPF    | Genotype        | Notes | Sample Prep Notes ▲ |
|--|--------------------------|-------|--------|--------|-----------------|-------|---------------------|
|  | <input type="checkbox"/> | FAM   | 1      | 0.7748 | Heterozygote    |       |                     |
|  | <input type="checkbox"/> | VIC   | 2      | 1.5752 | Heterozygote    |       |                     |
|  | <input type="checkbox"/> | FAM   | 3      | 1.0310 | Heterozygote    |       |                     |
|  | <input type="checkbox"/> | VIC   | 4      | 0.2908 | Homozygote: FAM |       |                     |
|  | <input type="checkbox"/> | FAM   | 5      | 0.7653 | Heterozygote    |       |                     |
|  | <input type="checkbox"/> | VIC   | 6      | 1.5535 | Heterozygote    |       |                     |
|  | <input type="checkbox"/> | FAM   | 7      | 0.7647 | Heterozygote    |       |                     |
|  | <input type="checkbox"/> | VIC   | 8      | 1.5031 | Heterozygote    |       |                     |
|  | <input type="checkbox"/> | FAM   | 9      | 0.7412 | Heterozygote    |       |                     |
|  | <input type="checkbox"/> | VIC   | 10     | 1.5286 | Heterozygote    |       |                     |

The shortcut menu opens.

- 2 On the shortcut menu, choose *Rename Genotype*.

|  | Excluded                 | Dye ▲ | Number | EPF    | Genotype        | Notes | Sample Prep Notes ▲ |
|--|--------------------------|-------|--------|--------|-----------------|-------|---------------------|
|  | <input type="checkbox"/> | FAM   | 1      | 0.7748 | Heterozygote    |       |                     |
|  | <input type="checkbox"/> | VIC   | 2      | 1.5752 | Heterozygote    |       |                     |
|  | <input type="checkbox"/> | FAM   | 3      | 1.0310 | Heterozygote    |       |                     |
|  | <input type="checkbox"/> | VIC   | 4      | 0.2908 | Homozygote: FAM |       |                     |
|  | <input type="checkbox"/> | FAM   | 5      | 0.7653 | Heterozygote    |       |                     |
|  | <input type="checkbox"/> | VIC   | 6      | 1.5535 | Heterozygote    |       |                     |
|  | <input type="checkbox"/> | FAM   | 7      | 0.7647 | Heterozygote    |       |                     |
|  | <input type="checkbox"/> | VIC   | 8      | 1.5031 | Heterozygote    |       |                     |
|  | <input type="checkbox"/> | FAM   | 9      | 0.7412 | Heterozygote    |       |                     |
|  | <input type="checkbox"/> | VIC   | 10     | 1.5286 | Heterozygote    |       |                     |

The *Rename Genotype* dialog box opens.

- 3 In the *New Name:* field, type in the new name for the selected genotype, for example, *Heterozygote Gene 1*, and choose *OK*.

**Rename Genotype**

New Name:

OK Cancel

All genotypes of this group are renamed in the *Result Table* view.

- 4 Repeat steps 1 to 3 for another group of genotypes.

### Optional: To filter the results

- 1 In the *Result Table* view, choose the filter icon  in the header of the corresponding column, for example, *Genotype*.

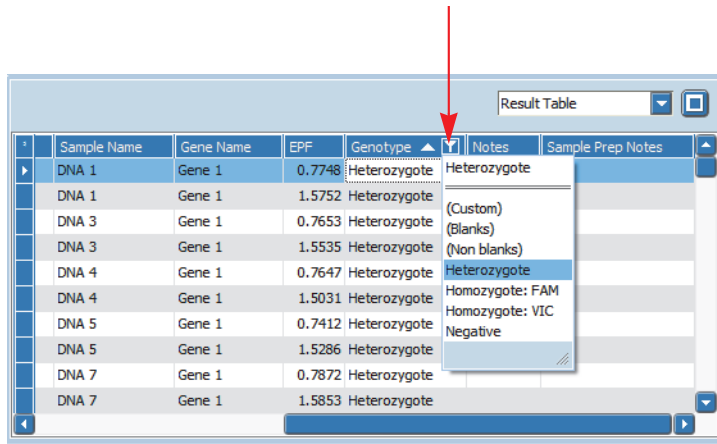

A list with all values found in this column and the category (*Custom*) is displayed.

- 2 Choose one of the values in this list, for example, *Heterozygote*.

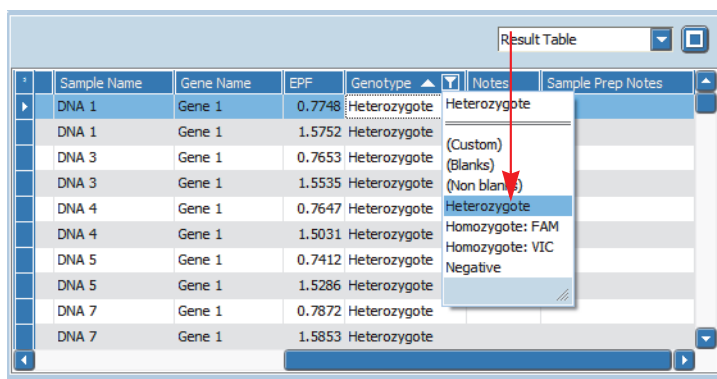

The table is updated and the filter definition is displayed below.

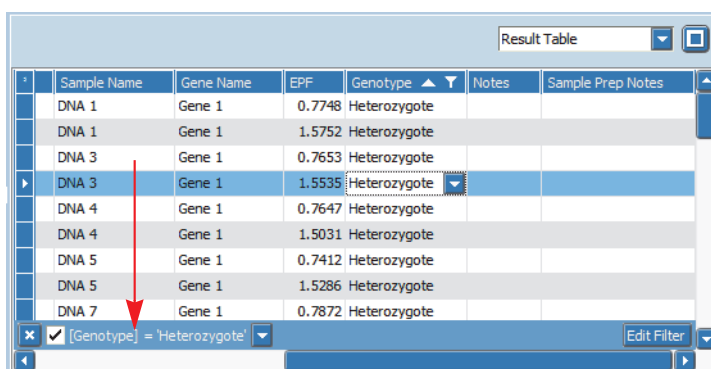

- 3 Repeat steps 1 and 2 to add additional values to the filter specification.  
The items are filtered by these values. Only items matching all the filter conditions are displayed in the table.

**Optional: To change the color of the samples**

Change the color of the samples to distinguish the corresponding amplification curves from each other.

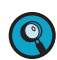

The color settings in the 'Result Table' view correspond to the color settings in the 'Amplification Curves' view.

- 1 Choose the sample(s) for which you want to change the color, for example, the NTC samples.

| Color | Position | Sample Name | Gene Name | Excluded | Dye | Number |
|-------|----------|-------------|-----------|----------|-----|--------|
|       | H1       | DNA 43      | Gene 1    |          | VIC | 86     |
|       | H2       | DNA 44      | Gene 1    |          | FAM | 87     |
|       | H2       | DNA 44      | Gene 1    |          | VIC | 88     |
|       | H3       | DNA 45      | Gene 1    |          | FAM | 89     |
|       | H3       | DNA 45      | Gene 1    |          | VIC | 90     |
|       | H4       | DNA 46      | Gene 1    |          | FAM | 91     |
|       | H4       | DNA 46      | Gene 1    |          | VIC | 92     |
|       | H5       | NTC         | Gene 1    |          | FAM | 93     |
|       | H5       | NTC         | Gene 1    |          | VIC | 94     |
|       | H6       | NTC         | Gene 1    |          | FAM | 95     |
|       | H6       | NTC         | Gene 1    |          | VIC | 96     |

- 2 Right-click the selected sample(s) to open the corresponding shortcut menu.

| Color | Position | Sample Name | Gene Name | Excluded | Dye | Number |
|-------|----------|-------------|-----------|----------|-----|--------|
|       | H1       | DNA 43      | Gene 1    |          | VIC | 86     |
|       | H2       | DNA 44      | Gene 1    |          | FAM | 87     |
|       | H2       | DNA 44      | Gene 1    |          | VIC | 88     |
|       | H3       | DNA 45      | Gene 1    |          | FAM | 89     |
|       | H3       | DNA 45      | Gene 1    |          | VIC | 90     |
|       | H4       | DNA 46      | Gene 1    |          | FAM | 91     |
|       | H4       | DNA 46      | Gene 1    |          | VIC | 92     |
|       | H5       | NTC         | Gene 1    |          | FAM | 93     |
|       | H5       | NTC         | Gene 1    |          | VIC | 94     |
|       | H6       | NTC         | Gene 1    |          | FAM | 95     |
|       | H6       | NTC         | Gene 1    |          | VIC | 96     |

- 3 On the shortcut menu, choose the down arrow next to *Color*.

| Color | Position | Sample Name | Gene Name | Excluded | Dye | Number |
|-------|----------|-------------|-----------|----------|-----|--------|
|       | H1       | DNA 43      | Gene 1    |          | VIC | 86     |
|       | H2       | DNA 44      | Gene 1    |          | FAM | 87     |
|       | H2       | DNA 44      | Gene 1    |          | VIC | 88     |
|       | H3       | DNA 45      | Gene 1    |          | FAM | 89     |
|       | H3       | DNA 45      | Gene 1    |          | VIC | 90     |
|       | H4       | DNA 46      | Gene 1    |          | FAM | 91     |
|       | H4       | DNA 46      | Gene 1    |          | VIC | 92     |
|       | H5       | NTC         | Gene 1    |          | FAM | 93     |
|       | H5       | NTC         | Gene 1    |          | VIC | 94     |
|       | H6       | NTC         | Gene 1    |          | FAM | 95     |
|       | H6       | NTC         | Gene 1    |          | VIC | 96     |

The color selection dialog box opens.

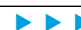

- 4 Choose a color field to assign a different color to the selected sample(s), for example, red.

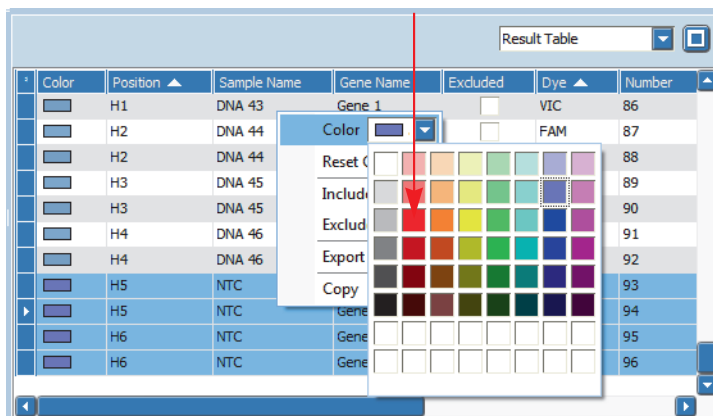

The color for the selected sample(s) changes in the *Result Table* view and in the *Amplification Curves* view.

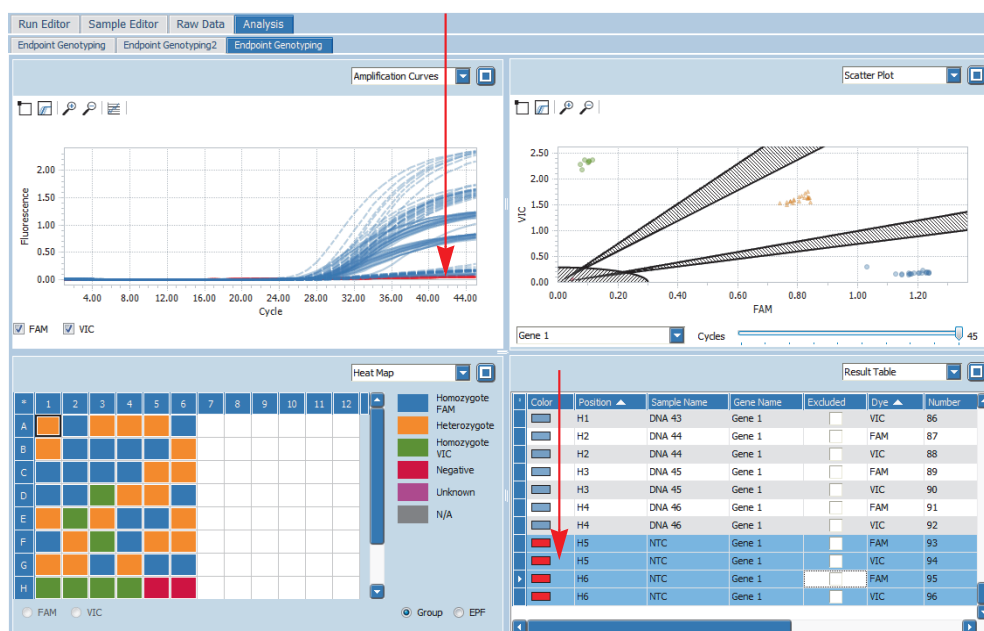

- 5 Repeat steps 1 to 4 for another group of samples.

## 2.6 Exporting result data

You can export the following result data to Microsoft Word or Excel:

- ▶ The result table as a text file.
- ▶ The result graphs as a PNG file, GIF file, or text file.

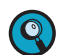

For detailed information on how to export result data, refer to the *LightCycler® 96 System Operator's Guide*, chapter B, section "Exporting analysis results".

### 3 Relative quantification

Relative quantification compares the levels of two different gene sequences in a single sample, for example, target gene of interest and a reference gene, and expresses the result as a ratio. For comparison purposes, the reference gene is known to be present in constant numbers under all test conditions. This reference gene provides a basis for normalizing sample-to-sample differences.

The ratio of target gene to reference gene is a relative, dimensionless number, that is meaningful only when compared between samples. In addition to calculating sample-specific ratios, a normalized ratio is calculated by defining a "run calibrator" sample. The run calibrator is typically a positive sample with a stable ratio of target to reference. Its value is used to normalize all samples within one run, and also to provide a constant calibration point between several runs.

In addition to normalization, it is frequently required to measure the gene expression of each sample and each gene at different times or under different conditions. To generate a meaningful result, the sample-specific measurements are normalized to a common basis, that is, a certain experimental condition, to provide a scaled ratio. This condition is specified as the "study calibrator" condition.

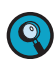

For detailed information on relative quantification analysis, refer to the *LightCycler® 96 System Operator's Guide*, chapter A, section "Analysis principles".

#### 3.1 Experiment overview

The following example describes how to set up, run, and analyze a gene expression assay. It comprises three samples tested at three different times (that is, at the three conditions *0 hours*, *1 hour*, and *2 hours*), one target gene and one reference gene.

The assay is performed using a LightCycler® 480 Multiwell Plate 96, white. Each sample is set up in duplicate.

|          |                                                                                                                                                                                                                                                                                                                           |
|----------|---------------------------------------------------------------------------------------------------------------------------------------------------------------------------------------------------------------------------------------------------------------------------------------------------------------------------|
| Samples  | cDNA samples.<br>Three samples are tested at three different times.                                                                                                                                                                                                                                                       |
| Reagents | <ul style="list-style-type: none"> <li>▶ FastStart Essential DNA Probes Master (2 x conc.)</li> <li>▶ Target primer mix, 5 µM (10 x conc.)</li> <li>▶ Target hydrolysis probe, 10 µM (50 x conc.)</li> <li>▶ Reference primer mix, 5 µM (10 x conc.)</li> <li>▶ Reference hydrolysis probe, 10 µM (50 x conc.)</li> </ul> |

## 3.2 Setting up the samples

To set up the samples:

- ▶ Set up the sample dilutions, see section [Sample dilution](#) below.
- ▶ Include a no template control (NTC), see section [Controls](#) below.
- ▶ Prepare the PCR mixes, see sections [PCR mix for the target gene](#) below, and [PCR mix for the reference gene](#), on page 100.
- ▶ Pipette the sample dilution and the PCR mix, see section [Pipetting scheme](#), on page 100.
- ▶ Centrifuge the multiwell plate, see section [Centrifugation](#), on page 101.

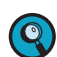

*Continuously cool the samples during setup by keeping the tubes on ice.*

### Sample dilution

The 3 human cDNA samples from total RNA (concentration approximately 50 ng/μl) are diluted to a consistent concentration of 5 ng/μl.

### Controls

To ensure an accurate relative quantification analysis, it is highly recommended that you include a no template control (NTC) in your experiment.

### PCR mix for the target gene

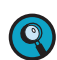

*When setting up the PCR mix, compensate for pipetting losses. We recommend preparing PCR mixes with 10% extra volume.*

The table below shows the components included in the PCR mix for one 20 μl reaction. The PCR mix volume is 15 μl for a subsequent sample input of 5 μl per reaction.

| Component                                 | Concentration | Volume       | Final conc. |
|-------------------------------------------|---------------|--------------|-------------|
| Water, PCR grade                          |               | 2.6 μl       |             |
| FastStart Essential DNA Probes Master     | 2 x conc.     | 10 μl        | 1 x conc.   |
| Primer mix for target gene                | 10 x conc.    | 2.0 μl       | 500 nM each |
| UPL Probe for target gene (FAM)           | 50 x conc.    | 0.4 μl       | 200 nM      |
| <b>Total volume (without sample cDNA)</b> |               | <b>15 μl</b> |             |

**PCR mix for the reference gene**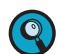

When setting up the PCR mix, compensate for pipetting losses. We recommend preparing PCR mixes with 10% extra volume.

The table below shows the components included in the PCR mix for one 20 µl reaction. The PCR mix volume is 15 µl for a subsequent sample input of 5 µl per reaction.

| Component                                 | Concentration | Volume       | Final conc. |
|-------------------------------------------|---------------|--------------|-------------|
| Water, PCR grade                          |               | 2.6 µl       |             |
| FastStart Essential DNA Probes Master     | 2 x conc.     | 10 µl        | 1 x conc.   |
| Primer mix for reference gene             | 10 x conc.    | 2.0 µl       | 500 nM each |
| UPL Probe for reference gene (FAM)        | 50 x conc.    | 0.4 µl       | 200 nM      |
| <b>Total volume (without sample cDNA)</b> |               | <b>15 µl</b> |             |

**Pipetting scheme**

- 1 Pipette 15 µl of the PCR mix for the target gene into 20 wells, rows A and B, columns 1 to 10 of the multiwell plate according to the following scheme.
- 2 Pipette 15 µl of the PCR mix for the reference gene into 20 wells, rows C and D, columns 1 to 10 of the multiwell plate according to the following scheme.
- 3 Pipette 5 µl of cDNA sample into the corresponding wells according to the following scheme.
- 4 For the NTCs, pipette 5 µl of water (instead of cDNA sample) into the corresponding wells in column 10 according to the following scheme.

|   | 1              | 2              | 3              | 4              | 5              | 6              | 7              | 8              | 9              | 10  | 11 | 12 |
|---|----------------|----------------|----------------|----------------|----------------|----------------|----------------|----------------|----------------|-----|----|----|
| A | Sample1<br>0 h | Sample2<br>0 h | Sample3<br>0 h | Sample1<br>1 h | Sample2<br>1 h | Sample3<br>1 h | Sample1<br>2 h | Sample2<br>2 h | Sample3<br>2 h | NTC |    |    |
| B | Sample1<br>0 h | Sample2<br>0 h | Sample3<br>0 h | Sample1<br>1 h | Sample2<br>1 h | Sample3<br>1 h | Sample1<br>2 h | Sample2<br>2 h | Sample3<br>2 h | NTC |    |    |
| C | Sample1<br>0 h | Sample2<br>0 h | Sample3<br>0 h | Sample1<br>1 h | Sample2<br>1 h | Sample3<br>1 h | Sample1<br>2 h | Sample2<br>2 h | Sample3<br>2 h | NTC |    |    |
| D | Sample1<br>0 h | Sample2<br>0 h | Sample3<br>0 h | Sample1<br>1 h | Sample2<br>1 h | Sample3<br>1 h | Sample1<br>2 h | Sample2<br>2 h | Sample3<br>2 h | NTC |    |    |
| E |                |                |                |                |                |                |                |                |                |     |    |    |
| F |                |                |                |                |                |                |                |                |                |     |    |    |
| G |                |                |                |                |                |                |                |                |                |     |    |    |
| H |                |                |                |                |                |                |                |                |                |     |    |    |

## Centrifugation

- 1 Seal the multiwell plate with the LightCycler® 480 Sealing Foil using the sealing foil applicator (provided with the system package).
- 2 Centrifuge the multiwell plate at 1500 x *g* for 2 minutes in a standard swing-bucket centrifuge, using a rotor for multiwell plates.  
 *Make sure you balance the multiwell plate with a suitable counterweight (for example, another multiwell plate).*

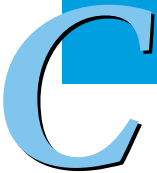

### 3.3 Experiment run parameters



For detailed information on how to program an experiment, see one of the following sections:

[Programming the experiment with the LightCycler® 96 Application Software](#), on page 20.

[Programming the experiment with the LightCycler® 96 Instrument Software](#), on page 32.

Run a standard PCR profile for hydrolysis probes including a 2-step amplification program. The experiment includes the run parameters for the temperature profile, the detection format, and the reaction volume. These parameters are listed in the following tables.

#### Temperature profile



For detailed information on how to program a temperature profile, see one of the following sections:

For working with the LightCycler® 96 Application Software: [Creating the temperature profile](#), on page 23.

For working with the LightCycler® 96 Instrument Software: [Creating the temperature profile](#), on page 35.

For this example, use the following heating and cooling cycles:

| Programs             |                  | Steps       |              |             |                  |
|----------------------|------------------|-------------|--------------|-------------|------------------|
| Name                 | Number of cycles | Ramp (°C/s) | Duration (s) | Target (°C) | Acquisition Mode |
| Preincubation        | 1                | 4.4         | 600          | 95          | None             |
| 2-step amplification | 45               | 4.4         | 10           | 95          | None             |
|                      |                  | 2.2         | 30           | 60          | Single           |
| Cooling              | 1                | 2.2         | 30           | 40          | None             |

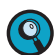

It is not necessary to add a separate cooling program at the end of the run. At the end of each run, the samples are automatically cooled to +37°C.

For the ramp rate for heating and cooling (*Ramp* (°C/s)), the default values are used in this example.

For the steps of the amplification program, the following default settings are used in this example:

- ▶ LightCycler® 96 Application Software: For *Gradient* and *Touch down*, the default settings are used.
- ▶ For *Mode*, the default *Standard* option is used.

In the *Temperature Profile* window area, the following graphical summary of the programs selected for the experiment and their temperature and time settings is displayed.

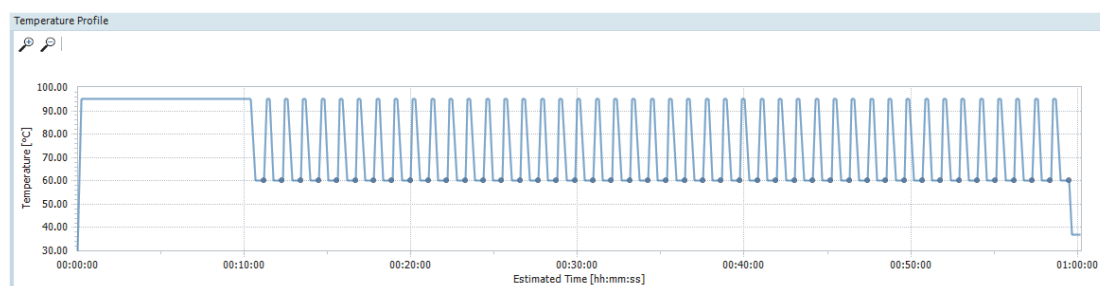

## Detection format

Selecting the dye (FAM) for this mono-color experiment determines the channel combination for the measurement during the run. For all other parameters, the default values are used in this example.



For detailed information on how to specify the detection format, see one of the following sections:  
For working with the LightCycler® 96 Application Software: [To specify the detection format for the experiment](#), on page 27.  
For working with the LightCycler® 96 Instrument Software: [To specify the detection format for the experiment](#), on page 40.

For this example, use the following channel:

| Dye | Channel |
|-----|---------|
| FAM | 470/514 |

## Reaction volume



As the LightCycler® 96 Instrument does not validate the reaction volume, ensure that the specified reaction volume matches the volume pipetted into the wells of the multiwell plate.

For detailed information on how to specify the reaction volume, see one of the following sections:  
For working with the LightCycler® 96 Application Software: [To specify the reaction volume for the experiment](#), on page 27.  
For working with the LightCycler® 96 Instrument Software: [To specify the reaction volume for the experiment](#), on page 42.

For this example, use the following reaction volume:

| Reaction volume |
|-----------------|
| 20 µl           |

## Experiment run

Once you have set up the samples and defined the experiment run parameters, you can start the run. For detailed information on how to run the experiment, see section [Running the experiment](#), on page 43.

### 3.4 Editing the sample data

For editing the sample data, the experiment must be opened in the LightCycler® 96 Application Software. You can edit the sample list before or after the run, depending on your preferred routine.

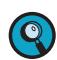

*The LightCycler® 96 Application Software offers two different views for editing the samples: the plate view and the table view. This user training guide describes how to edit the samples using the plate view, which shows the samples in 96 wells laid out to match the physical instrument. Changes in the plate view are immediately displayed in the table view and vice versa.*

*For detailed information on the 'Sample Editor' tab, refer to the LightCycler® 96 System Operator's Guide, chapter B, section "Sample Editor tab".*

To edit the sample list:

- ▶ Clear empty wells to eliminate them from the analysis, see section [Empty wells](#) below.
- ▶ Edit the sample names, see section [Sample names](#), on page 105.
- ▶ Edit the sample types, see section [Sample types](#), on page 106.
- ▶ Assign a gene for the dye, see section [Gene assignment](#), on page 107.
- ▶ Specify the three conditions for each sample, see section [To specify the conditions](#), on page 107.

#### Empty wells

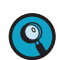

*For detailed information on how to clear empty wells, see section [To clear empty wells](#), on page 51.*

For this example, clear the following wells (see also the multiwell plate image below):

- ▶ Columns 11 to 12
- ▶ Rows E to H

|   | 1                      | 2                      | 3                      | 4                      | 5                      | 6                      | 7                      | 8                      | 9                      | 10                     | 11 | 12 |
|---|------------------------|------------------------|------------------------|------------------------|------------------------|------------------------|------------------------|------------------------|------------------------|------------------------|----|----|
| A | U<br>Sample 1<br>None  | U<br>Sample 2<br>None  | U<br>Sample 3<br>None  | U<br>Sample 4<br>None  | U<br>Sample 5<br>None  | U<br>Sample 6<br>None  | U<br>Sample 7<br>None  | U<br>Sample 8<br>None  | U<br>Sample 9<br>None  | U<br>Sample 10<br>None |    |    |
| B | U<br>Sample 13<br>None | U<br>Sample 14<br>None | U<br>Sample 15<br>None | U<br>Sample 16<br>None | U<br>Sample 17<br>None | U<br>Sample 18<br>None | U<br>Sample 19<br>None | U<br>Sample 20<br>None | U<br>Sample 21<br>None | U<br>Sample 22<br>None |    |    |
| C | U<br>Sample 25<br>None | U<br>Sample 26<br>None | U<br>Sample 27<br>None | U<br>Sample 28<br>None | U<br>Sample 29<br>None | U<br>Sample 30<br>None | U<br>Sample 31<br>None | U<br>Sample 32<br>None | U<br>Sample 33<br>None | U<br>Sample 34<br>None |    |    |
| D | U<br>Sample 37<br>None | U<br>Sample 38<br>None | U<br>Sample 39<br>None | U<br>Sample 40<br>None | U<br>Sample 41<br>None | U<br>Sample 42<br>None | U<br>Sample 43<br>None | U<br>Sample 44<br>None | U<br>Sample 45<br>None | U<br>Sample 46<br>None |    |    |
| E |                        |                        |                        |                        |                        |                        |                        |                        |                        |                        |    |    |
| F |                        |                        |                        |                        |                        |                        |                        |                        |                        |                        |    |    |
| G |                        |                        |                        |                        |                        |                        |                        |                        |                        |                        |    |    |
| H |                        |                        |                        |                        |                        |                        |                        |                        |                        |                        |    |    |

## Sample names



For detailed information on how to edit the sample names, see section [To edit the sample names and the sample types](#), on page 53.

For this example, the following sample names apply (see also the multiwell plate image below):

| Name    | Samples in the plate view                      |
|---------|------------------------------------------------|
| NTC     | For the negative control in column 10          |
| Sample1 | For the unknown samples in columns 1, 4, and 7 |
| Sample2 | For the unknown samples in columns 2, 5, and 8 |
| Sample3 | For the unknown samples in columns 3, 6, and 9 |

|   | 1                     | 2                     | 3                     | 4                     | 5                     | 6                     | 7                     | 8                     | 9                     | 10               | 11 | 12 |
|---|-----------------------|-----------------------|-----------------------|-----------------------|-----------------------|-----------------------|-----------------------|-----------------------|-----------------------|------------------|----|----|
| A | U<br>Sample 1<br>None | U<br>Sample 2<br>None | U<br>Sample 3<br>None | U<br>Sample 1<br>None | U<br>Sample 2<br>None | U<br>Sample 3<br>None | U<br>Sample 1<br>None | U<br>Sample 2<br>None | U<br>Sample 3<br>None | U<br>NTC<br>None |    |    |
| B | U<br>Sample 1<br>None | U<br>Sample 2<br>None | U<br>Sample 3<br>None | U<br>Sample 1<br>None | U<br>Sample 2<br>None | U<br>Sample 3<br>None | U<br>Sample 1<br>None | U<br>Sample 2<br>None | U<br>Sample 3<br>None | U<br>NTC<br>None |    |    |
| C | U<br>Sample 1<br>None | U<br>Sample 2<br>None | U<br>Sample 3<br>None | U<br>Sample 1<br>None | U<br>Sample 2<br>None | U<br>Sample 3<br>None | U<br>Sample 1<br>None | U<br>Sample 2<br>None | U<br>Sample 3<br>None | U<br>NTC<br>None |    |    |
| D | U<br>Sample 1<br>None | U<br>Sample 2<br>None | U<br>Sample 3<br>None | U<br>Sample 1<br>None | U<br>Sample 2<br>None | U<br>Sample 3<br>None | U<br>Sample 1<br>None | U<br>Sample 2<br>None | U<br>Sample 3<br>None | U<br>NTC<br>None |    |    |
| E |                       |                       |                       |                       |                       |                       |                       |                       |                       |                  |    |    |
| F |                       |                       |                       |                       |                       |                       |                       |                       |                       |                  |    |    |
| G |                       |                       |                       |                       |                       |                       |                       |                       |                       |                  |    |    |
| H |                       |                       |                       |                       |                       |                       |                       |                       |                       |                  |    |    |

## Sample types

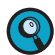

For detailed information on how to edit the sample types, see section [To edit the sample names and the sample types](#), on page 53.

In this example the following sample types apply (see also the multiwell plate image below):

| Type              | Samples in the plate view                        |
|-------------------|--------------------------------------------------|
| Negative control  | For the samples <i>NTC</i>                       |
| Unknown (default) | For the samples <i>Sample1</i> to <i>Sample3</i> |

|   | 1                     | 2                     | 3                     | 4                     | 5                     | 6                     | 7                     | 8                     | 9                     | 10               | 11 | 12 |
|---|-----------------------|-----------------------|-----------------------|-----------------------|-----------------------|-----------------------|-----------------------|-----------------------|-----------------------|------------------|----|----|
| A | U<br>Sample 3<br>None | U<br>Sample 2<br>None | U<br>Sample 3<br>None | U<br>Sample 1<br>None | U<br>Sample 2<br>None | U<br>Sample 3<br>None | U<br>Sample 1<br>None | U<br>Sample 2<br>None | U<br>Sample 3<br>None | -<br>NTC<br>None |    |    |
| B | U<br>Sample 1<br>None | U<br>Sample 2<br>None | U<br>Sample 3<br>None | U<br>Sample 1<br>None | U<br>Sample 2<br>None | U<br>Sample 3<br>None | U<br>Sample 1<br>None | U<br>Sample 2<br>None | U<br>Sample 3<br>None | -<br>NTC<br>None |    |    |
| C | U<br>Sample 1<br>None | U<br>Sample 2<br>None | U<br>Sample 3<br>None | U<br>Sample 1<br>None | U<br>Sample 2<br>None | U<br>Sample 3<br>None | U<br>Sample 1<br>None | U<br>Sample 2<br>None | U<br>Sample 3<br>None | -<br>NTC<br>None |    |    |
| D | U<br>Sample 1<br>None | U<br>Sample 2<br>None | U<br>Sample 3<br>None | U<br>Sample 1<br>None | U<br>Sample 2<br>None | U<br>Sample 3<br>None | U<br>Sample 1<br>None | U<br>Sample 2<br>None | U<br>Sample 3<br>None | -<br>NTC<br>None |    |    |
| E |                       |                       |                       |                       |                       |                       |                       |                       |                       |                  |    |    |
| F |                       |                       |                       |                       |                       |                       |                       |                       |                       |                  |    |    |
| G |                       |                       |                       |                       |                       |                       |                       |                       |                       |                  |    |    |
| H |                       |                       |                       |                       |                       |                       |                       |                       |                       |                  |    |    |

Unknown
Standard
Positive control
Negative control
Non reverse transcription control

## Gene assignment



For detailed information on how to assign a gene to the dye, see section [To assign a gene to the dye\(s\)](#), on page 55.

In this example the following gene assignment applies:

| Gene name              | Dye | Samples in the plate view                         |
|------------------------|-----|---------------------------------------------------|
| Gene 1 (target gene)   | FAM | For the samples in the rows <i>A</i> and <i>B</i> |
| Ref 1 (reference gene) | FAM | For the samples in the rows <i>C</i> and <i>D</i> |

|   | 1                       | 2                       | 3                       | 4                       | 5                       | 6                       | 7                       | 8                       | 9                       | 10                 | 11 | 12 |
|---|-------------------------|-------------------------|-------------------------|-------------------------|-------------------------|-------------------------|-------------------------|-------------------------|-------------------------|--------------------|----|----|
| A | U<br>Sample 3<br>Gene 1 | U<br>Sample 2<br>Gene 1 | U<br>Sample 3<br>Gene 1 | U<br>Sample 1<br>Gene 1 | U<br>Sample 2<br>Gene 1 | U<br>Sample 3<br>Gene 1 | U<br>Sample 1<br>Gene 1 | U<br>Sample 2<br>Gene 1 | U<br>Sample 3<br>Gene 1 | -<br>NTC<br>Gene 1 |    |    |
| B | U<br>Sample 1<br>Gene 1 | U<br>Sample 2<br>Gene 1 | U<br>Sample 3<br>Gene 1 | U<br>Sample 1<br>Gene 1 | U<br>Sample 2<br>Gene 1 | U<br>Sample 3<br>Gene 1 | U<br>Sample 1<br>Gene 1 | U<br>Sample 2<br>Gene 1 | U<br>Sample 3<br>Gene 1 | -<br>NTC<br>Gene 1 |    |    |
| C | U<br>Sample 1<br>Ref 1  | U<br>Sample 2<br>Ref 1  | U<br>Sample 3<br>Ref 1  | U<br>Sample 1<br>Ref 1  | U<br>Sample 2<br>Ref 1  | U<br>Sample 3<br>Ref 1  | U<br>Sample 1<br>Ref 1  | U<br>Sample 2<br>Ref 1  | U<br>Sample 3<br>Ref 1  | -<br>NTC<br>Ref 1  |    |    |
| D | U<br>Sample 1<br>Ref 1  | U<br>Sample 2<br>Ref 1  | U<br>Sample 3<br>Ref 1  | U<br>Sample 1<br>Ref 1  | U<br>Sample 2<br>Ref 1  | U<br>Sample 3<br>Ref 1  | U<br>Sample 1<br>Ref 1  | U<br>Sample 2<br>Ref 1  | U<br>Sample 3<br>Ref 1  | -<br>NTC<br>Ref 1  |    |    |
| E |                         |                         |                         |                         |                         |                         |                         |                         |                         |                    |    |    |
| F |                         |                         |                         |                         |                         |                         |                         |                         |                         |                    |    |    |
| G |                         |                         |                         |                         |                         |                         |                         |                         |                         |                    |    |    |
| H |                         |                         |                         |                         |                         |                         |                         |                         |                         |                    |    |    |

## To specify the conditions

- 1 In the multiwell plate image, select columns 1, 2, and 3.

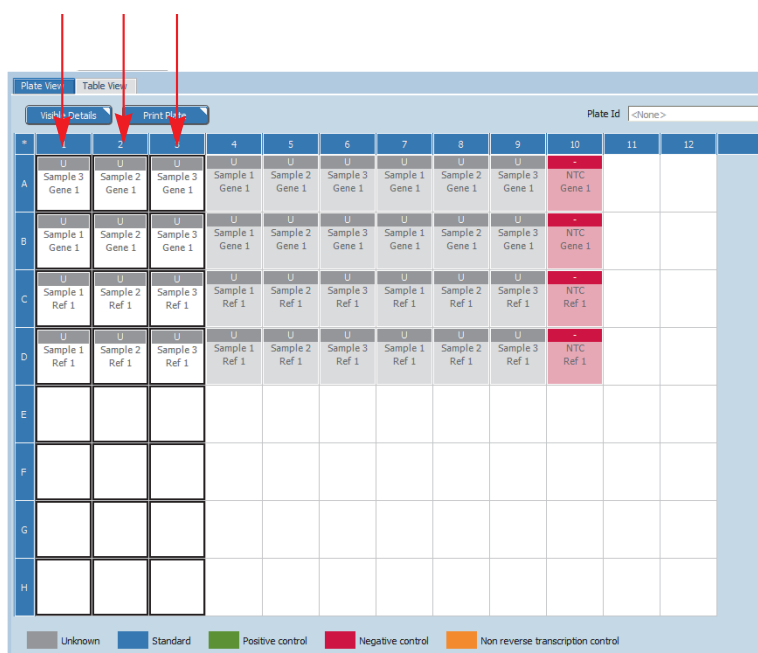

2 In the *Reaction Properties* window area, choose the *Condition Name* text field.

3 Type in *0 h*.

The condition *0 h* is assigned to all selected samples.

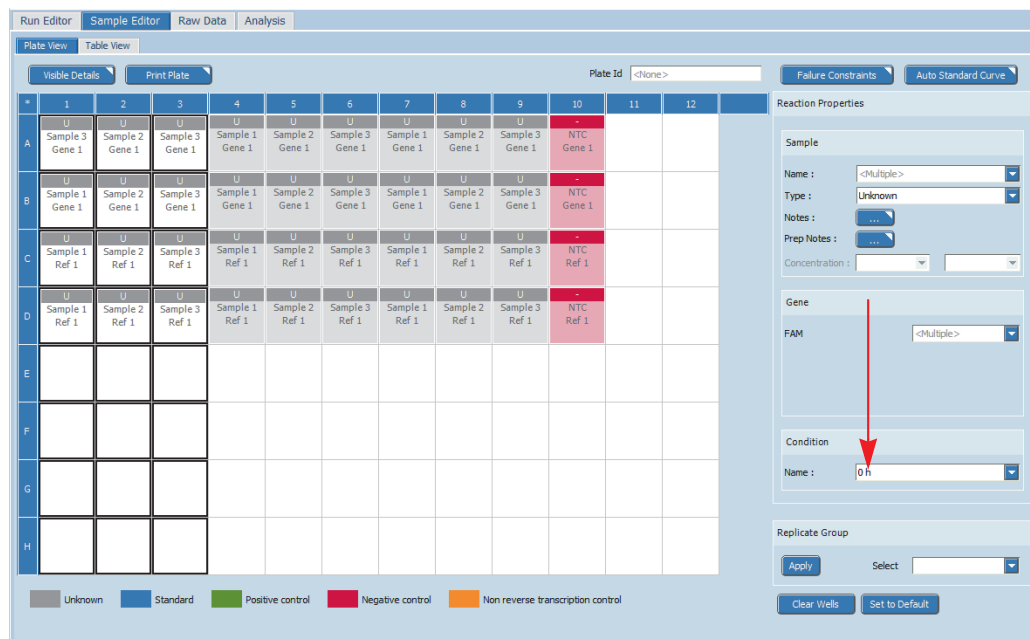

The screenshot shows the 'Reaction Properties' window in the LightCycler 96 software. The 'Condition Name' field is highlighted with a red arrow and contains the text '0 h'. The window also displays fields for Sample Name, Type, Notes, Prep Notes, Concentration, Gene, FAM, and Replicate Group. The background shows a plate layout with wells A-H and 1-12.

4 As described in steps 1 to 3, assign the condition *1 h* to all wells in columns 4, 5, and 6.

5 As described in steps 1 to 3, assign the condition *2 h* to all wells in columns 7, 8, and 9.

|   | 1                       | 2                       | 3                       | 4                              | 5                              | 6                              | 7                              | 8                              | 9                              | 10                 | 11 | 12 |
|---|-------------------------|-------------------------|-------------------------|--------------------------------|--------------------------------|--------------------------------|--------------------------------|--------------------------------|--------------------------------|--------------------|----|----|
| A | U<br>Sample 1<br>Gene 1 | U<br>Sample 2<br>Gene 1 | U<br>Sample 3<br>Gene 1 | U<br>Sample 1<br>1 h<br>Gene 1 | U<br>Sample 2<br>1 h<br>Gene 1 | U<br>Sample 3<br>1 h<br>Gene 1 | U<br>Sample 1<br>2 h<br>Gene 1 | U<br>Sample 2<br>2 h<br>Gene 1 | U<br>Sample 3<br>2 h<br>Gene 1 | -<br>NTC<br>Gene 1 |    |    |
| B | U<br>Sample 1<br>Gene 1 | U<br>Sample 2<br>Gene 1 | U<br>Sample 3<br>Gene 1 | U<br>Sample 1<br>1 h<br>Gene 1 | U<br>Sample 2<br>1 h<br>Gene 1 | U<br>Sample 3<br>1 h<br>Gene 1 | U<br>Sample 1<br>2 h<br>Gene 1 | U<br>Sample 2<br>2 h<br>Gene 1 | U<br>Sample 3<br>2 h<br>Gene 1 | -<br>NTC<br>Gene 1 |    |    |
| C | U<br>Sample 1<br>Ref 1  | U<br>Sample 2<br>Ref 1  | U<br>Sample 3<br>Ref 1  | U<br>Sample 1<br>1 h<br>Ref 1  | U<br>Sample 2<br>1 h<br>Ref 1  | U<br>Sample 3<br>1 h<br>Ref 1  | U<br>Sample 1<br>2 h<br>Ref 1  | U<br>Sample 2<br>2 h<br>Ref 1  | U<br>Sample 3<br>2 h<br>Ref 1  | -<br>NTC<br>Ref 1  |    |    |
| D | U<br>Sample 1<br>Ref 1  | U<br>Sample 2<br>Ref 1  | U<br>Sample 3<br>Ref 1  | U<br>Sample 1<br>1 h<br>Ref 1  | U<br>Sample 2<br>1 h<br>Ref 1  | U<br>Sample 3<br>1 h<br>Ref 1  | U<br>Sample 1<br>2 h<br>Ref 1  | U<br>Sample 2<br>2 h<br>Ref 1  | U<br>Sample 3<br>2 h<br>Ref 1  | -<br>NTC<br>Ref 1  |    |    |
| E |                         |                         |                         |                                |                                |                                |                                |                                |                                |                    |    |    |
| F |                         |                         |                         |                                |                                |                                |                                |                                |                                |                    |    |    |
| G |                         |                         |                         |                                |                                |                                |                                |                                |                                |                    |    |    |
| H |                         |                         |                         |                                |                                |                                |                                |                                |                                |                    |    |    |

### 3.5 Analyzing the results



For detailed information on the 'Analysis' tab, refer to the *LightCycler® 96 System Operator's Guide*, chapter B, section "Relative quantification".

For detailed information on working with tables and graphs, refer to the *LightCycler® 96 System Operator's Guide*, chapter B, section "General software conventions".

Relative quantification compares the levels of two different gene sequences, that is, the target gene of interest and a reference gene, in a single sample, and expresses the final result as a ratio of these genes.

To analyze the calculated results of the relative quantification application:

- ▶ Create the relative quantification analysis, see section [Creating the analysis](#) below.
- ▶ Specify the settings for the relative quantification analysis, see section [Analysis settings](#), on page 111.
- ▶ In the different views of the *Rel Quant* tab, check the analysis results and customize the result data if necessary:
  - ▶ For the *Amplification Curves* view, see section [Amplification curves](#), on page 113.
  - ▶ For the *Ratio Bars* view, see section [Ratio bars](#), on page 113.
  - ▶ For the *Heat Map* view, see section [Heat map](#), on page 117.
  - ▶ For the *Result Table* view, see section [Result table](#), on page 118.
  - ▶ For the *Cq Bars* view, see section [Cq bars](#), on page 77.

#### 3.5.1 Creating the analysis

##### To create the relative quantification analysis

- 1 Open the *Analysis* tab.
- 2 In the tool bar, choose the *Add Analysis* icon to add a new analysis.

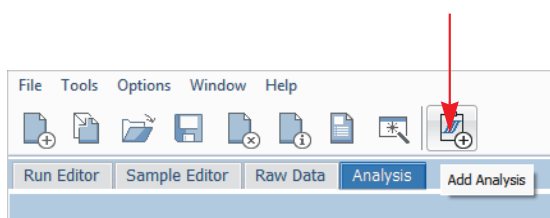

The *Create New Analysis* dialog box opens.

- 3 Choose *Rel Quant*.

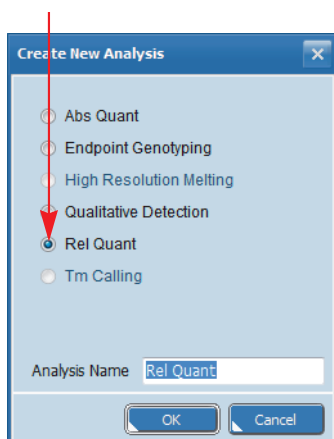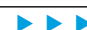

#### 4 Choose OK.

The *Rel Quant* tab displays three different views for the experiment using default values:

- ▶ *Amplification Curves*
- ▶ *Heat Map*
- ▶ *Result Table*

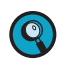

The 'Ratio Bars' view is empty until you specify the analysis settings for the relative quantification analysis, see section [Analysis settings](#), on page 111.

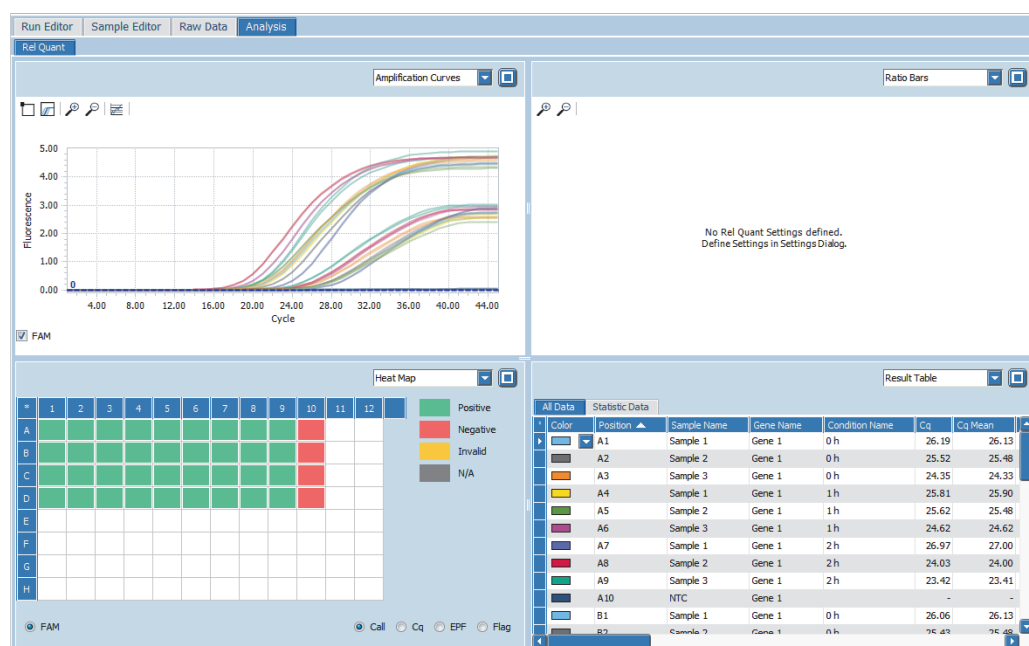

### 3.5.2 Analysis settings

In this example, specify the following settings:

- ▶ The reference gene.
- ▶ The study calibrator condition.
- ▶ For *Efficiency*, the default values are used, as no standard curve was calculated.

#### To specify the reference gene

- 1 In the tool bar, choose the *Analysis Settings* icon.

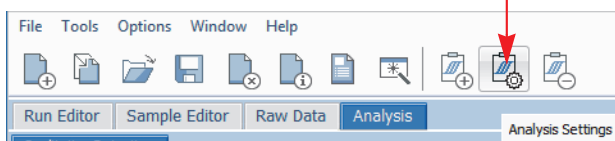

The *Rel Quant Settings* dialog box opens.

- 2 On the *Genes* tab, select the *Reference* check box for *Ref 1*.

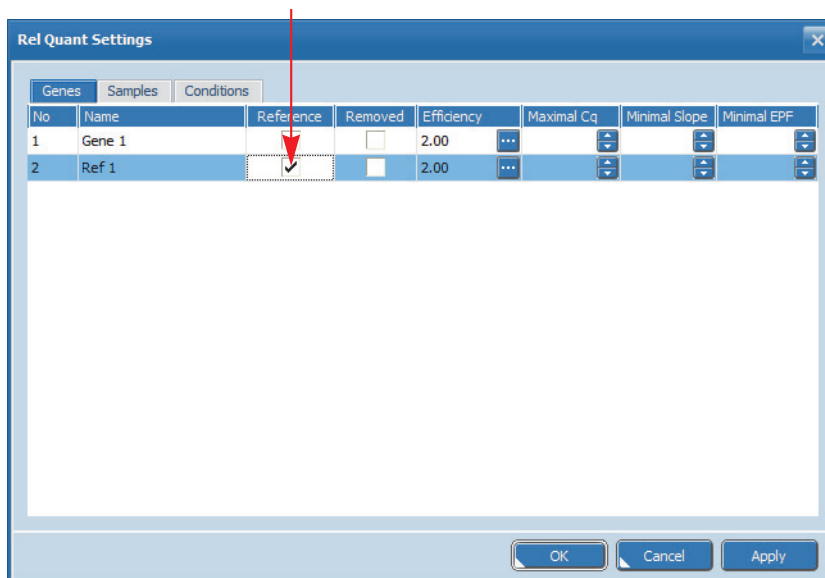

Choose *OK*.

The gene *Ref 1* is specified as the reference gene.

## To specify the study calibrator condition

The study calibrator condition is used to normalize all sample-specific measurements to a common basis.

- 1 In the *Rel Quant Settings* dialog box, choose the *Conditions* tab.

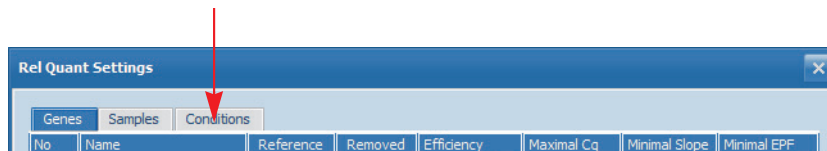

The *Conditions* tab opens.

- 2 On the *Conditions* tab, select the *Study Calibrator* check box for the condition 0 h.

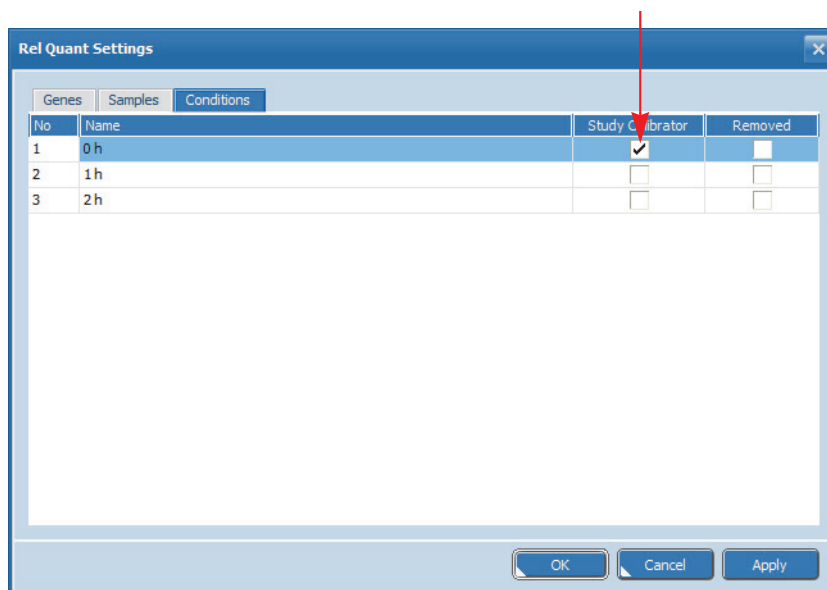

Choose *OK*. The condition 0 h (0 hours) is specified as the study calibrator condition.

Results are recalculated based on the relative ratio measured for each sample at the study calibrator condition, that is, the start of the experiment.

The *Ratio Bars* chart is displayed.

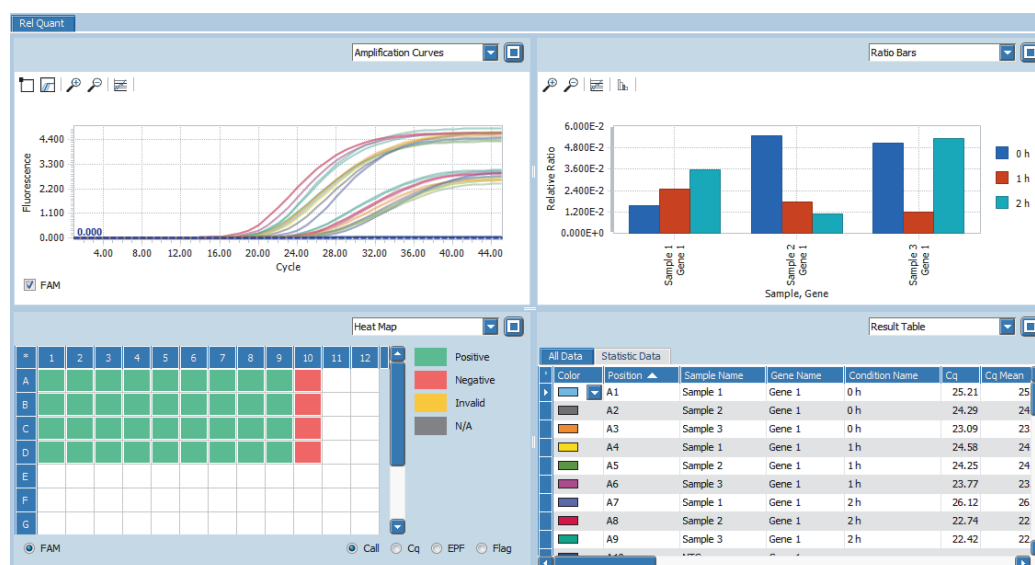

### 3.5.3 Amplification curves

On the *Rel Quant* tab, amplification curves display the fluorescence intensity against the number of cycles in the amplification program. There is one curve for each sample that has a gene labeled with the selected dye.

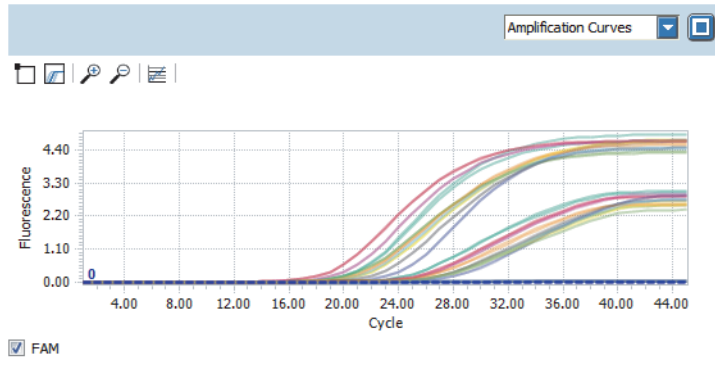

- 1 Check the amplification curves chart for correct amplification of target gene *Gene 1* and reference gene *Ref 1*.
- 2 Optional: For better distinction, customize the y axis scaling.  
For detailed information on how to modify the scaling of the y axis, see section [Optional: To modify the y axis scaling](#), on page 71.

### 3.5.4 Ratio bars

The *Ratio Bars* chart shows the corresponding ratio for each gene, sample, and condition. Each bar represents a ratio. The *Relative Ratio* chart is displayed by default.

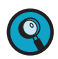

For detailed information on the possible ratios, refer to the *LightCycler® 96 System Operator's Guide*, chapter A, section "Relative quantification analysis".

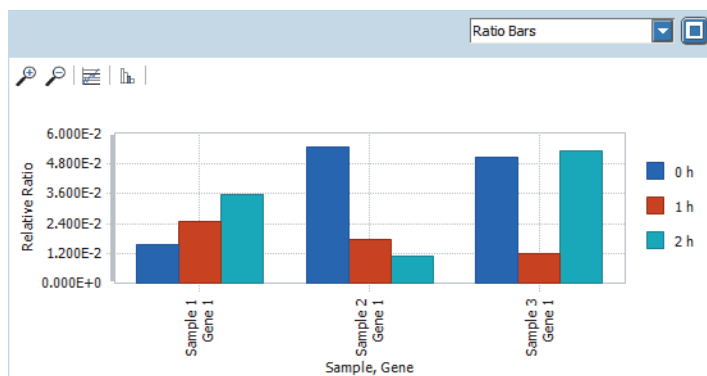

## To customize the visualization in the Ratio Bars chart

- 1 Choose the *Data Visualization* icon.

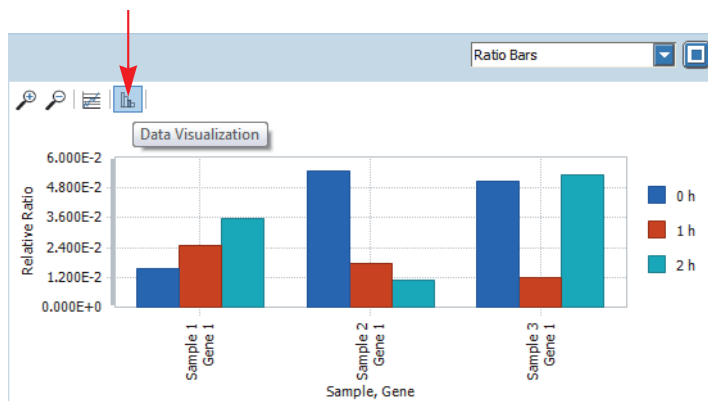

The *Data Visualization* dialog box opens.

- 2 In the *Order By* section, choose *Sample* and then the up arrow to move the item to *Position 1*.

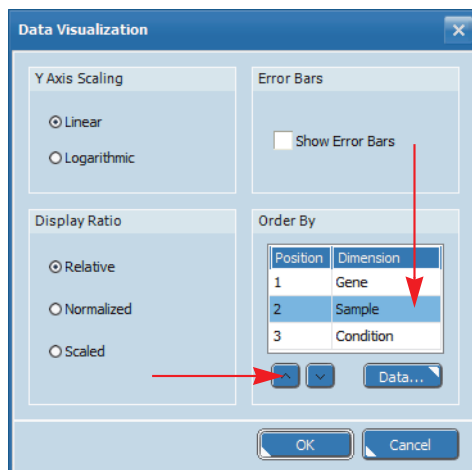

*Sample* is moved up to *Position 1*.

This means that the bars in the chart are ordered according to the following priority:

- ▶ 1: samples
- ▶ 2: genes
- ▶ 3: conditions

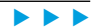

- 3 In the *Error Bars* section, select the *Show Error Bars* option to display error bars in the *Ratio Bars* chart.

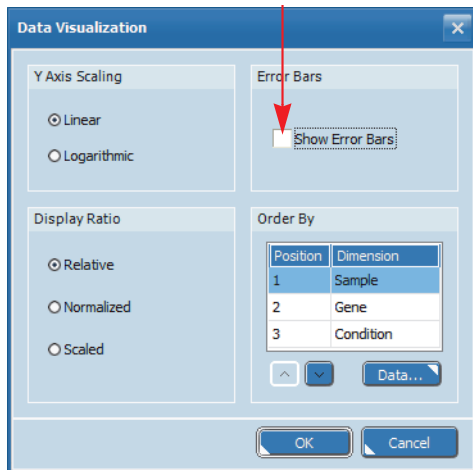

- 4 In the *Display Ratio* section, select *Scaled*, as a study calibrator for calculating scaled ratios is used in this example (see section [To specify the study calibrator condition](#), on page 112).

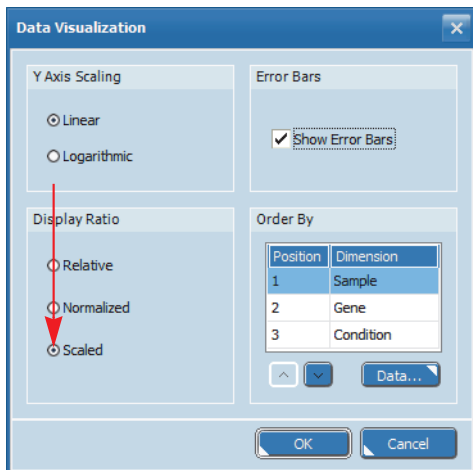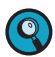

If no study calibrator condition is specified, keep the default option 'Relative' in the 'Display Ratio' section. Then the chart shows bars for all ratios.

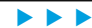

### 5 Choose OK

Results are recalculated based on the relative ratio measured for each sample at the study calibrator condition, that is, the start of the experiment.

The *Scaled Ratio* chart is displayed. This chart shows no bars for the study calibrator (condition 0 h).

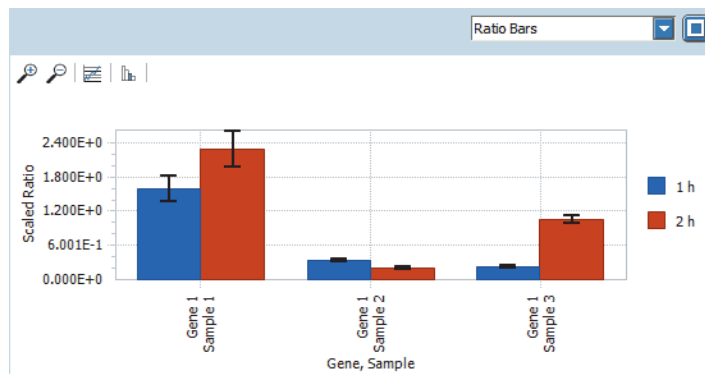

- ▶ *Sample 1*: The scaled ratio for gene 1 after two hours (condition 2 h) is higher than the scaled ratio after one hour (condition 1 h).
- ▶ *Sample 2*: The scaled ratio for gene 1 after two hours (condition 2 h) is lower than the scaled ratio after one hour (condition 1 h).
- ▶ *Sample 3*: The scaled ratio for gene 1 after two hours (condition 2 h) is higher than the scaled ratio after one hour (condition 1 h).

### 6 Optional: For better distinction, modify the y axis scaling.

For detailed information on how to modify the scaling of the y axis, see section [Optional: To modify the y axis scaling](#), on page 71.

### 3.5.5 Heat map

The heat map shows an image of the multiwell plate used in the experiment for the specified channel (FAM).

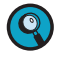

A heat map only displays the samples contained in the sample list. Samples not in the list (that is, cleared wells and removed samples and genes) are displayed in white and samples excluded from calculation are displayed in gray.

To display the sample name, gene name, and condition name for each sample, you can enlarge the heat map to fill the entire working area using the  button.

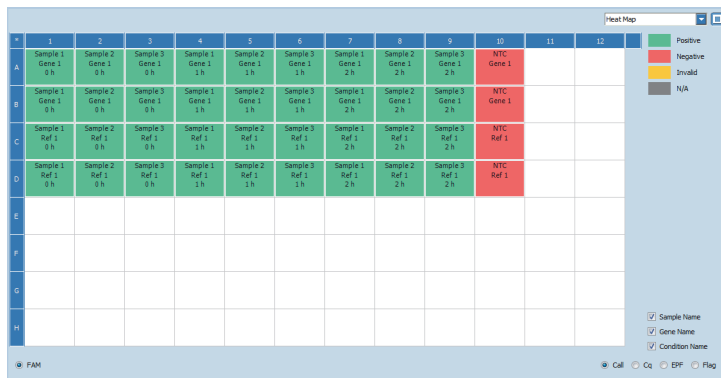

In this example the *Call* heat map is displayed. It shows the *Call* status of all samples contained in the sample list.

- ▶ The samples in columns 1 to 9 are green, that is, *Positive*.
- ▶ The NTCs in column 10 are red, that is, *Negative*.

### 3.5.6 Result table

The result table displays the calculated data results of the relative quantification on two different tabs.

- The *All Data* tab shows the values for *Ratio* and *Scaled Ratio*, each with the corresponding errors.

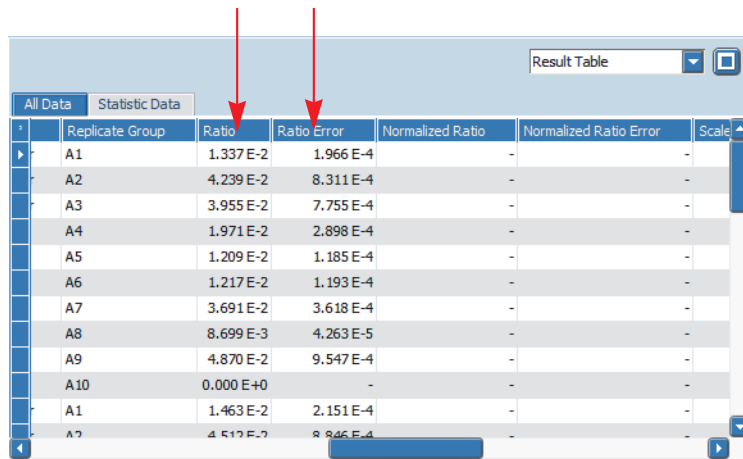

|     | Replicate Group | Ratio     | Ratio Error | Normalized Ratio | Normalized Ratio Error | Scale |
|-----|-----------------|-----------|-------------|------------------|------------------------|-------|
| A1  |                 | 1.337 E-2 | 1.966 E-4   | -                | -                      | -     |
| A2  |                 | 4.239 E-2 | 8.311 E-4   | -                | -                      | -     |
| A3  |                 | 3.955 E-2 | 7.755 E-4   | -                | -                      | -     |
| A4  |                 | 1.971 E-2 | 2.898 E-4   | -                | -                      | -     |
| A5  |                 | 1.209 E-2 | 1.185 E-4   | -                | -                      | -     |
| A6  |                 | 1.217 E-2 | 1.193 E-4   | -                | -                      | -     |
| A7  |                 | 3.691 E-2 | 3.618 E-4   | -                | -                      | -     |
| A8  |                 | 8.699 E-3 | 4.263 E-5   | -                | -                      | -     |
| A9  |                 | 4.870 E-2 | 9.547 E-4   | -                | -                      | -     |
| A10 |                 | 0.000 E+0 | -           | -                | -                      | -     |
| A1  |                 | 1.463 E-2 | 2.151 E-4   | -                | -                      | -     |
| A2  |                 | 4.512 E-2 | 8.846 E-4   | -                | -                      | -     |

- The *Statistic Data* tab summarizes all data for samples in replicate groups.

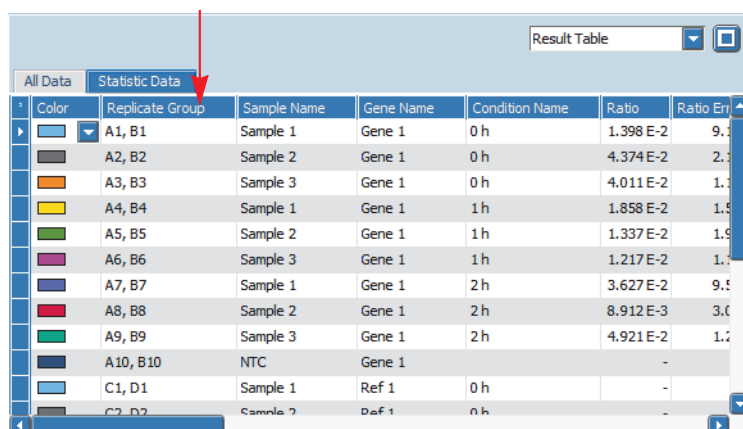

|          | Color | Replicate Group | Sample Name | Gene Name | Condition Name | Ratio     | Ratio Error |
|----------|-------|-----------------|-------------|-----------|----------------|-----------|-------------|
| A1, B1   |       |                 | Sample 1    | Gene 1    | 0 h            | 1.398 E-2 | 9.1         |
| A2, B2   |       |                 | Sample 2    | Gene 1    | 0 h            | 4.374 E-2 | 2.1         |
| A3, B3   |       |                 | Sample 3    | Gene 1    | 0 h            | 4.011 E-2 | 1.2         |
| A4, B4   |       |                 | Sample 1    | Gene 1    | 1 h            | 1.858 E-2 | 1.5         |
| A5, B5   |       |                 | Sample 2    | Gene 1    | 1 h            | 1.337 E-2 | 1.9         |
| A6, B6   |       |                 | Sample 3    | Gene 1    | 1 h            | 1.217 E-2 | 1.7         |
| A7, B7   |       |                 | Sample 1    | Gene 1    | 2 h            | 3.627 E-2 | 9.1         |
| A8, B8   |       |                 | Sample 2    | Gene 1    | 2 h            | 8.912 E-3 | 3.6         |
| A9, B9   |       |                 | Sample 3    | Gene 1    | 2 h            | 4.921 E-2 | 1.2         |
| A10, B10 |       |                 | NTC         | Gene 1    |                | -         | -           |
| C1, D1   |       |                 | Sample 1    | Ref 1     | 0 h            | -         | -           |
| C2, D2   |       |                 | Sample 2    | Ref 1     | 0 h            | -         | -           |

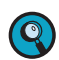

For detailed information on all calculated results displayed in the 'Result Table' view, refer to the *LightCycler® 96 System Operator's Guide*, chapter B, section "Relative quantification".

- 1 In the *Result Table* view, check if the results show the expected dynamic range.

### 3.5.7 Cq bars

The display of the Cq bars in relative quantification analysis corresponds to their display in absolute quantification analysis. For detailed information, see section [Cq bars](#), on page 77.

### 3.6 Exporting result data

You can export the following result data to Microsoft Word or Excel:

- ▶ The result table as a text file.
- ▶ The *Amplification Curves* chart and the *Standard Curves* chart as a PNG file, GIF file, or text file.
- ▶ The *Ratio Bars* chart as a PNG file or GIF file.

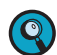

*For detailed information on how to export result data, refer to the LightCycler® 96 System Operator's Guide, chapter B, section "Exporting analysis results".*

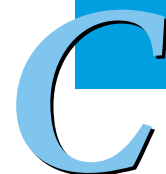

## 4 Qualitative detection

Qualitative detection is used to analyze the presence of a target nucleic acid in combination with an internal control (IC) nucleic acid. A qualitative detection analysis can be performed on any experiment containing an amplification program.

The internal control serves as an amplification control, allowing monitoring of PCR inhibitors and of the reliability of purification and amplification processes. The internal control might be RNA or DNA, depending on the type of the target nucleic acid. During PCR, the internal control is amplified with a separate set of primers.

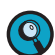

For detailed information on qualitative detection analysis, refer to the *LightCycler® 96 System Operator's Guide*, chapter A, section "Analysis principles".

### 4.1 Experiment overview

The following example describes how to set up, run, and analyze a qualitative detection experiment. The detection of the target nucleic acid is based on an internal control amplified in the same reaction well (dual-color mode).

For the *Target* gene a FAM-labeled hydrolysis probe is used, for the *IC* gene a Yellow555-labeled hydrolysis probe is used. One positive control and one negative control for *Target* and *IC* are used as experiment controls.

The assay is performed using a LightCycler® 480 Multiwell Plate 96, white. Each sample is set up in duplicate.

|          |                                                                                                                                                                                                                                                                                              |
|----------|----------------------------------------------------------------------------------------------------------------------------------------------------------------------------------------------------------------------------------------------------------------------------------------------|
| Samples  | ▶ DNA samples                                                                                                                                                                                                                                                                                |
| Reagents | ▶ FastStart Essential DNA Probes Master (2 x conc.)<br>▶ Target primer mix, 5 µM (12.5 x conc.)<br>▶ Target hydrolysis probe (UPL Probe, FAM-labeled), 10 µM (50 x conc.)<br>▶ IC primer mix, 20 µM (50 x conc.)<br>▶ IC hydrolysis probe (UPL Probe, Yellow555-labeled), 10 µM (50 x conc.) |

### 4.2 Setting up the samples

#### Sample dilution

The human genomic DNA samples are diluted to a concentration of approximately 5 ng/µl.

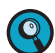

Continuously cool the samples during setup by keeping the reaction tubes on ice.

#### Controls

To ensure an accurate qualitative detection analysis, it is highly recommended that you run both the positive control for the *Target* gene and the positive control for the *IC* gene in the same setup as the unknown samples. This means that both DNAs are amplified in the same well of the multiwell plate.

## PCR mix



When setting up the PCR mix, compensate for pipetting losses. We recommend preparing PCR mixes with 10% extra volume.

The table below shows the components included in the PCR mix for one 20 µl reaction. The PCR mix volume is 19 µl for a subsequent sample input of 1 µl/reaction.

| Component                                | Concentration | Volume       | Final conc. |
|------------------------------------------|---------------|--------------|-------------|
| Water, PCR grade                         |               | 6.2 µl       |             |
| FastStart Essential DNA Probes Master    | 2 x conc.     | 10 µl        | 1 x conc.   |
| Primer mix for Target gene               | 12.5 x conc.  | 1.6 µl       | 400 nM each |
| UPL Probe for Target gene (FAM)          | 50 x conc.    | 0.4 µl       | 200 nM      |
| Primer mix for IC gene                   | 50 x conc.    | 0.4 µl       | 400 nM each |
| UPL Probe for IC gene (Yellow555)        | 50 x conc.    | 0.4 µl       | 200 nM      |
| <b>Total volume (without sample DNA)</b> |               | <b>19 µl</b> |             |

## Pipetting scheme

- 1 Pipette 19 µl of the PCR mix into 18 wells of the multiwell plate according to the following scheme.
- 2 Pipette 1 µl of sample into the corresponding wells according to the following scheme (each in duplicate).
- 3 For the positive control, use similar amounts of Target DNA and IC DNA; for the NTC, pipette 1 µl of water (instead of DNA sample) into the corresponding wells according to the following scheme.

|   | 1 | 2  | 3  | 4           | 5   | 6 | 7 | 8 | 9 | 10 | 11 | 12 |
|---|---|----|----|-------------|-----|---|---|---|---|----|----|----|
| A |   | S1 | S1 | Pos Control | NTC |   |   |   |   |    |    |    |
| B |   | S2 | S2 |             |     |   |   |   |   |    |    |    |
| C |   | S3 | S3 |             |     |   |   |   |   |    |    |    |
| D |   | S4 | S4 |             |     |   |   |   |   |    |    |    |
| E |   | S5 | S5 |             |     |   |   |   |   |    |    |    |
| F |   | S6 | S6 |             |     |   |   |   |   |    |    |    |
| G |   | S7 | S7 |             |     |   |   |   |   |    |    |    |
| H |   | S8 | S8 |             |     |   |   |   |   |    |    |    |

## Centrifugation

- 1 Seal the multiwell plate with the LightCycler® 480 Sealing Foil using the sealing foil applicator (provided with the system package).
- 2 Centrifuge the multiwell plate at 1500 x g for 2 minutes in a standard swing-bucket centrifuge, using a rotor for multiwell plates.

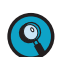

Make sure you balance the multiwell plate with a suitable counterweight (for example, another multiwell plate).

### 4.3 Experiment run parameters



For detailed information on how to program an experiment, see one of the following sections:

[Programming the experiment with the LightCycler® 96 Application Software](#), on page 20.

[Programming the experiment with the LightCycler® 96 Instrument Software](#), on page 32.

The experiment includes the run parameters listed in the following tables.

#### Temperature profile

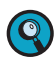

For detailed information on how to program a temperature profile, see one of the following sections:

For working with the LightCycler® 96 Application Software: [Creating the temperature profile](#), on page 23.

For working with the LightCycler® 96 Instrument Software: [Creating the temperature profile](#), on page 35.

For this example, use the following heating cycles:

| Programs             |                  | Steps       |              |             |                  |
|----------------------|------------------|-------------|--------------|-------------|------------------|
| Name                 | Number of cycles | Ramp (°C/s) | Duration (s) | Target (°C) | Acquisition Mode |
| Preincubation        | 1                | 4.4         | 600          | 95          | None             |
| 2 Step Amplification | 45               | 4.4         | 10           | 95          | None             |
|                      |                  | 2.2         | 30           | 60          | Single           |

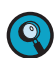

It is not necessary to add a separate cooling program at the end of the run. At the end of each run, the samples are automatically cooled to +37°C.

For the ramp rate for heating (*Ramp* (°C/s)), the default values are used in this example.

For the steps of the amplification program, the default settings are used in this example. For *Mode*, the default *Standard* option is used.

In the *Temperature Profile* window area, the following graphical summary of the programs selected for the experiment and their temperature and time settings is displayed.

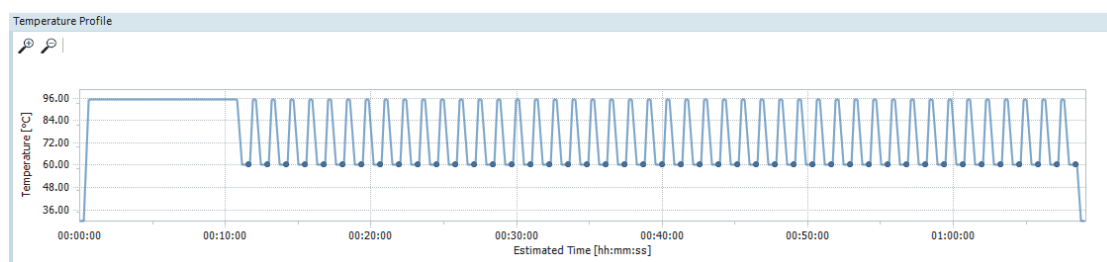

## Detection format

Selecting the dyes FAM and Yellow555 for this dual-color experiment determines the channel combination for the measurement during the run. For all other parameters, the default values are used in this example.

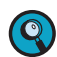

For detailed information on how to specify the detection format, see the following sections:

For working with the LightCycler® 96 Application Software: [To specify the detection format for the experiment](#), on page 27.

For working with the LightCycler® 96 Instrument Software: [To specify the detection format for the experiment](#), on page 40.

For this example, use the following channel combination:

| Dye       | Channel |
|-----------|---------|
| FAM       | 470/514 |
| Yellow555 | 533/572 |

## Reaction volume

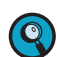

As the LightCycler® 96 Instrument does not validate the reaction volume, ensure that the specified reaction volume matches the volume pipetted into the wells of the multiwell plate.

For detailed information on how to specify the reaction volume, see one of the following sections:

For working with the LightCycler® 96 Application Software: [To specify the reaction volume for the experiment](#), on page 27.

For working with the LightCycler® 96 Instrument Software: [To specify the reaction volume for the experiment](#), on page 42.

For this example, use the following reaction volume:

| Reaction volume |
|-----------------|
| 20 µl           |

## Experiment run

Once you have set up the samples and defined the experiment run parameters, you can start the run. For detailed information on how to run the experiment, see section [Running the experiment](#), on page 43.

## 4.4 Editing the sample data

For editing the sample data, the experiment must be opened in the LightCycler® 96 Application Software. You can edit the sample list before or after the run, depending on your preferred routine.

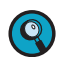

*The LightCycler® 96 Application Software offers two different views for editing the samples: the plate view and the table view. This user training guide describes how to edit the samples using the plate view, which shows the samples in 96 wells laid out to match the physical instrument. Changes in the plate view are immediately displayed in the table view and vice versa.*

*For detailed information on the 'Sample Editor' tab, refer to the LightCycler® 96 System Operator's Guide, chapter B, section "Sample Editor tab".*

To edit the sample list:

- ▶ Clear empty wells to eliminate them from the analysis, see section [Empty wells](#) below.
- ▶ Edit the sample names, see section [Sample names](#), on page 125.
- ▶ Edit the sample types, see section [Sample types](#), on page 126.
- ▶ Assign the genes to the dyes, see section [Gene assignment](#), on page 127.
- ▶ Check if the replicate groups are correctly assigned to all samples, see section [Replicate groups](#), on page 67.

### Empty wells

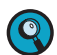

*For detailed information on how to clear empty wells, see section [To clear empty wells](#), on page 51.*

For this example, clear the following wells (see also the multiwell plate image below):

- ▶ Column 1
- ▶ Columns 6 to 12
- ▶ Wells B4 to H4 and B5 to H5

|   | 1 | 2                      | 3                      | 4                     | 5                     | 6 | 7 | 8 | 9 | 10 | 11 | 12 |
|---|---|------------------------|------------------------|-----------------------|-----------------------|---|---|---|---|----|----|----|
| A |   | U<br>Sample 2<br>None  | U<br>Sample 3<br>None  | U<br>Sample 4<br>None | U<br>Sample 5<br>None |   |   |   |   |    |    |    |
| B |   | U<br>Sample 14<br>None | U<br>Sample 15<br>None |                       |                       |   |   |   |   |    |    |    |
| C |   | U<br>Sample 26<br>None | U<br>Sample 27<br>None |                       |                       |   |   |   |   |    |    |    |
| D |   | U<br>Sample 38<br>None | U<br>Sample 39<br>None |                       |                       |   |   |   |   |    |    |    |
| E |   | U<br>Sample 50<br>None | U<br>Sample 51<br>None |                       |                       |   |   |   |   |    |    |    |
| F |   | U<br>Sample 62<br>None | U<br>Sample 63<br>None |                       |                       |   |   |   |   |    |    |    |
| G |   | U<br>Sample 74<br>None | U<br>Sample 75<br>None |                       |                       |   |   |   |   |    |    |    |
| H |   | U<br>Sample 86<br>None | U<br>Sample 87<br>None |                       |                       |   |   |   |   |    |    |    |

## Sample names



For detailed information on how to edit the sample names, see section [To edit the sample names and the sample types](#), on page 53.

For this example, the following sample names apply (see also the multiwell plate image below):

| Name        | Samples in the plate view                  |
|-------------|--------------------------------------------|
| S1          | For the unknown samples in wells A2 and A3 |
| S2          | For the unknown samples in wells B2 and B3 |
| S3          | For the unknown samples in wells C2 and C3 |
| S4          | For the unknown samples in wells D2 and D3 |
| S5          | For the unknown samples in wells E2 and E3 |
| S6          | For the unknown samples in wells F2 and F3 |
| S7          | For the unknown samples in wells G2 and G3 |
| S8          | For the unknown samples in wells H2 and H3 |
| Pos Control | For the positive control in well A4        |
| NTC         | For the negative control in well A5        |

| * | 1 | 2               | 3               | 4                        | 5                | 6 | 7 | 8 | 9 | 10 | 11 | 12 |
|---|---|-----------------|-----------------|--------------------------|------------------|---|---|---|---|----|----|----|
| A |   | U<br>S1<br>None | U<br>S1<br>None | U<br>Pos Cont...<br>None | U<br>NTC<br>None |   |   |   |   |    |    |    |
| B |   | U<br>S2<br>None | U<br>S2<br>None |                          |                  |   |   |   |   |    |    |    |
| C |   | U<br>S3<br>None | U<br>S3<br>None |                          |                  |   |   |   |   |    |    |    |
| D |   | U<br>S4<br>None | U<br>S4<br>None |                          |                  |   |   |   |   |    |    |    |
| E |   | U<br>S5<br>None | U<br>S5<br>None |                          |                  |   |   |   |   |    |    |    |
| F |   | U<br>S6<br>None | U<br>S6<br>None |                          |                  |   |   |   |   |    |    |    |
| G |   | U<br>S7<br>None | U<br>S7<br>None |                          |                  |   |   |   |   |    |    |    |
| H |   | U<br>S8<br>None | U<br>S8<br>None |                          |                  |   |   |   |   |    |    |    |

## Sample types



For detailed information on how to edit the sample types, see section [To edit the sample names and the sample types](#), on page 53.

In this example the following sample types apply:

| Type              | Samples in the plate view              |
|-------------------|----------------------------------------|
| Unknown (default) | For the samples <i>S1</i> to <i>S8</i> |
| Positive control  | For the sample <i>Pos Control</i>      |
| Negative control  | For the sample <i>NTC</i>              |

|   | 1 | 2               | 3               | 4 | 5 | 6 | 7 | 8 | 9 | 10 | 11 | 12 |
|---|---|-----------------|-----------------|---|---|---|---|---|---|----|----|----|
| A |   | U<br>S1<br>None | U<br>S1<br>None | + | - |   |   |   |   |    |    |    |
| B |   | U<br>S2<br>None | U<br>S2<br>None |   |   |   |   |   |   |    |    |    |
| C |   | U<br>S3<br>None | U<br>S3<br>None |   |   |   |   |   |   |    |    |    |
| D |   | U<br>S4<br>None | U<br>S4<br>None |   |   |   |   |   |   |    |    |    |
| E |   | U<br>S5<br>None | U<br>S5<br>None |   |   |   |   |   |   |    |    |    |
| F |   | U<br>S6<br>None | U<br>S6<br>None |   |   |   |   |   |   |    |    |    |
| G |   | U<br>S7<br>None | U<br>S7<br>None |   |   |   |   |   |   |    |    |    |
| H |   | U<br>S8<br>None | U<br>S8<br>None |   |   |   |   |   |   |    |    |    |

Unknown
Standard
Positive control
Negative control
Non reverse transcription control

## Gene assignment



For detailed information on how to assign a gene to the dye, see section [To assign a gene to the dye\(s\)](#), on page 55.

In this example the following gene assignment applies:

| Gene name             | Dye       | Samples in the plate view |
|-----------------------|-----------|---------------------------|
| Target                | FAM       | For all the samples       |
| IC (internal control) | Yellow555 | For all the samples       |

|   | 1 | 2                        | 3                        | 4                        | 5                   | 6 | 7 | 8 | 9 | 10 | 11 | 12 |
|---|---|--------------------------|--------------------------|--------------------------|---------------------|---|---|---|---|----|----|----|
| A |   | U<br>S 1<br>Target<br>IC | U<br>S 1<br>Target<br>IC | Pos Cont<br>Target<br>IC | NTC<br>Target<br>IC |   |   |   |   |    |    |    |
| B |   | U<br>S 2<br>Target<br>IC | U<br>S 2<br>Target<br>IC |                          |                     |   |   |   |   |    |    |    |
| C |   | U<br>S 3<br>Target<br>IC | U<br>S 3<br>Target<br>IC |                          |                     |   |   |   |   |    |    |    |
| D |   | U<br>S 4<br>Target<br>IC | U<br>S 4<br>Target<br>IC |                          |                     |   |   |   |   |    |    |    |
| E |   | U<br>S 5<br>Target<br>IC | U<br>S 5<br>Target<br>IC |                          |                     |   |   |   |   |    |    |    |
| F |   | U<br>S 6<br>Target<br>IC | U<br>S 6<br>Target<br>IC |                          |                     |   |   |   |   |    |    |    |
| G |   | U<br>S 7<br>Target<br>IC | U<br>S 7<br>Target<br>IC |                          |                     |   |   |   |   |    |    |    |
| H |   | U<br>S 8<br>Target<br>IC | U<br>S 8<br>Target<br>IC |                          |                     |   |   |   |   |    |    |    |

## Replicate groups

The LightCycler® 96 Application Software automatically groups samples into replicate groups, provided they have identical values for the following properties:

- ▶ Sample name
- ▶ Sample type
- ▶ Concentration
- ▶ Gene name

Each replicate group is named according to the top leftmost of the grouped samples.

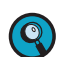

Changing one of these properties removes the corresponding sample from the replicate group.

1

Check if the multiwell plate image displays the same replicate groups for samples with identical values.

## 4.5 Analyzing the results

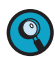

For detailed information on the 'Analysis' tab, refer to the *LightCycler® 96 System Operator's Guide*, chapter B, section "Qualitative detection".

For detailed information on working with tables and graphs, refer to the *LightCycler® 96 System Operator's Guide*, chapter B, section "General software conventions".

To analyze the calculated results of the qualitative detection application:

- ▶ Create the qualitative detection analysis, see section [Creating the analysis](#) below.
- ▶ Optional: Specify the settings for the qualitative detection analysis, see section [Analysis settings](#), on page 130.
- ▶ In the different views of the *Qualitative Detection* tab, check the analysis results and customize the result data if necessary:
  - ▶ For the *Amplification Curves* view, see section [Amplification curves](#), on page 131.
  - ▶ For the *Heat Map* view, see section [Heat map](#), on page 131.
  - ▶ For the *Combined Call Heat Map* view, see section [Combined call heat map](#), on page 132.
  - ▶ For the *Result Table* view, see section [Result table](#), on page 133.

### 4.5.1 Creating the analysis

#### To create the Qualitative Detection analysis

- 1 Open the *Analysis* tab.
- 2 In the tool bar, choose the *Add Analysis* icon to add a new analysis.

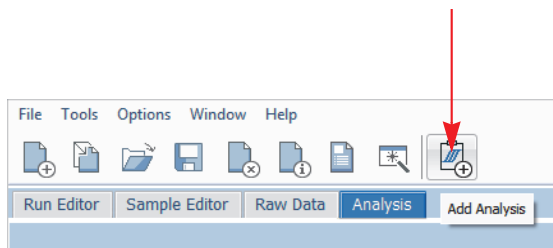

The *Create New Analysis* dialog box opens.

- 3 Choose *Qualitative Detection*.

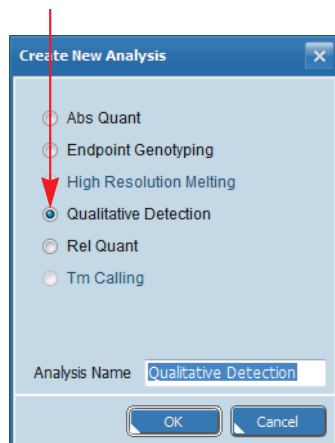

- 4 Choose *OK*.  
The *Qualitative Detection* dialog box opens.

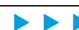

- 5 In the *Qualitative Detection* dialog box, specify the analysis-specific settings:
- ▶ Under *Target and internal control in same position?*, keep the default option.
  - ▶ Under *Internal Control Dye*, select *Yellow555*.
  - ▶ Choose *OK*.

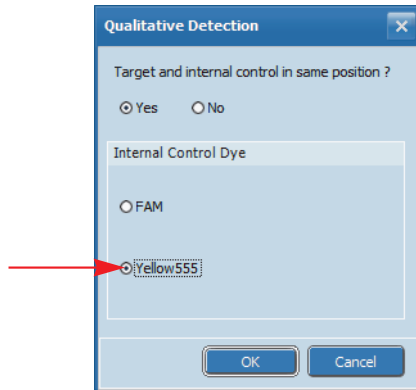

- 6 The *Analysis* tab displays four different views for the experiment using default values:

- ▶ *Amplification Curves*
- ▶ *Combined Call Heat Map*
- ▶ *Heat Map*
- ▶ *Result Table*

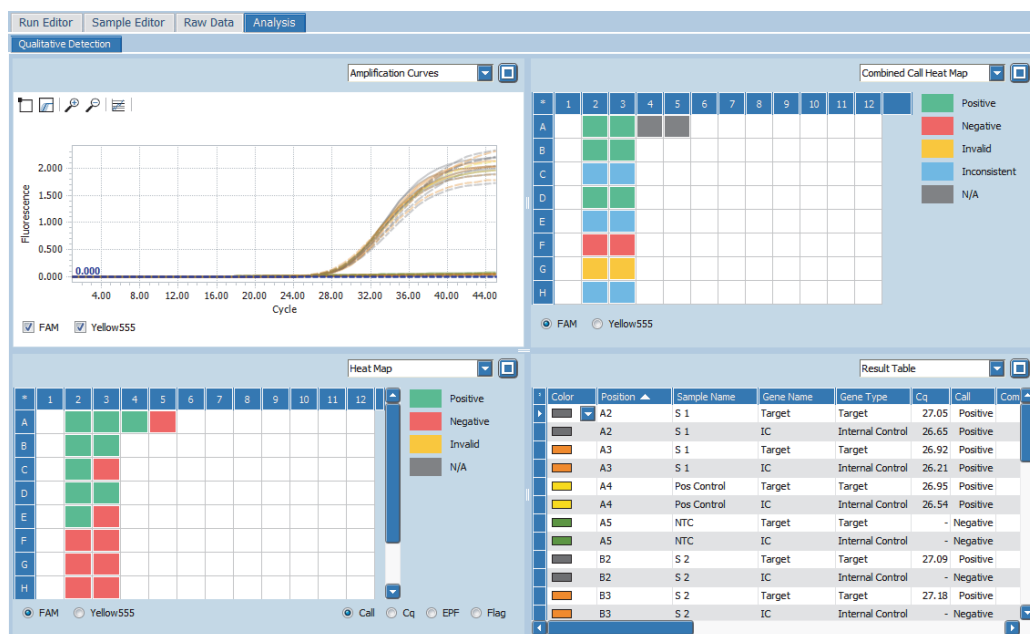

#### 4.5.2 Analysis settings

##### Optional: To specify the analysis settings

- 1 In the tool bar, choose the *Analysis Settings* icon.

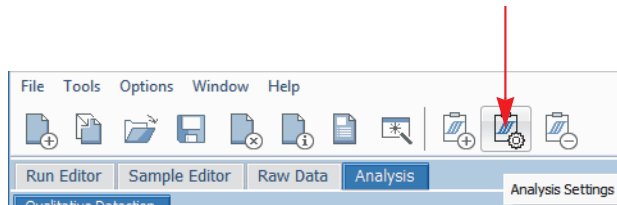

The *Qualitative Detection Settings* dialog box opens.

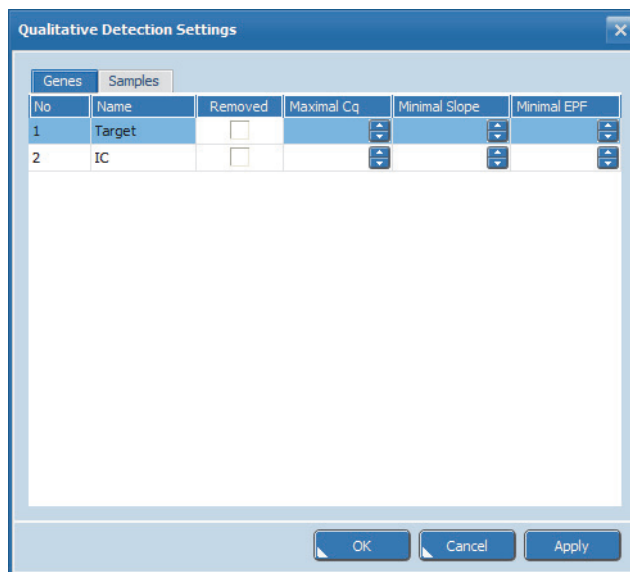

- 2 In the *Qualitative Detection Settings* dialog box, specify the analysis-specific settings, for example:
  - ▶ On the *Genes* tab, modify the value of the *Minimal EPF*, if applicable.
  - ▶ On the *Samples* tab, remove samples from the analysis, if applicable.

C

### 4.5.3 Amplification curves

On the *Qualitative Detection* tab, amplification curves display the fluorescence intensity against the number of cycles in the amplification program. There is one curve for each sample that has a gene labeled with the selected dye.

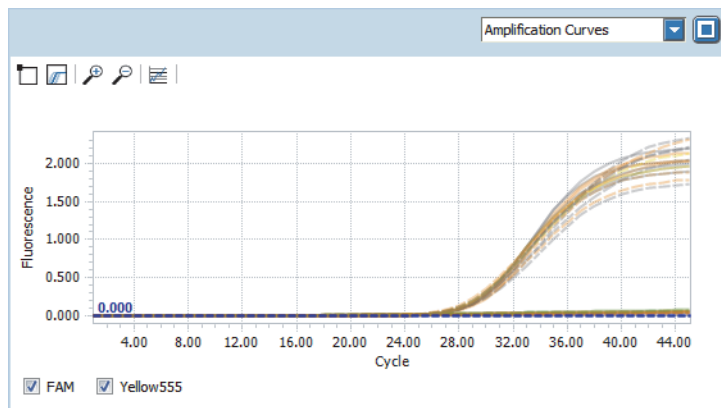

- 1 Optional: For better distinction, change the colors of the curves, for example, color all curves for the gene *Target* in one color, and the curves for the gene *IC* in another, selecting the appropriate genes in the result table.  
For detailed information on how to change the color of the curves, see section [To change the color of the samples](#), on page 74.
- 2 Optional: For better distinction, customize the y axis scaling.  
For detailed information on how to modify the scaling of the y axis, see section [Optional: To modify the y axis scaling](#), on page 71.
- 3 Check the *Amplification Curves* chart for correct amplification.

### 4.5.4 Heat map

The heat map shows an image of the multiwell plate used in the experiment for the specified channel. In this example, the heat map for FAM is displayed.

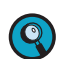

A heat map only displays the samples contained in the sample list. Samples not in the list (that is, cleared wells and removed samples and genes) are displayed in white and samples excluded from calculation are displayed in gray.

To display the sample name and the gene name for each sample, you can enlarge the heat map to fill the entire working area using the  button.

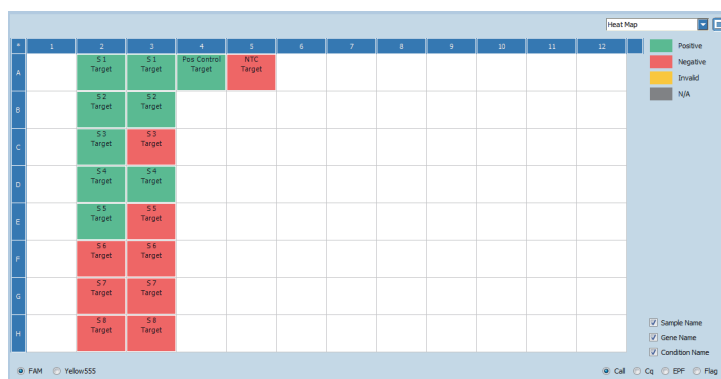

In this example the *Call* heat map is displayed. It shows the *Call* status of all samples contained in the sample list:

- ▶ The samples *A2*, *A3*, *A4*, *B2*, *B3*, *C2*, *D2*, *D3*, and *E2* are green, that is, *Positive*.
- ▶ The samples *A5*, *C3*, *E3*, *F2*, *F3*, *G2*, *G3*, *H2*, *H3*, and the NTC *A5* are red, that is, *Negative*.

#### 4.5.5 Combined call heat map

The combined call heat map shows an image of the multiwell plate used in the experiment. It reports results as a combined call by combining the individual calls of both genes, *Target* and *IC*.

The following basic result types are reported:

| Combined call result type | Meaning                                                                                                                                                                                                                                                                          |
|---------------------------|----------------------------------------------------------------------------------------------------------------------------------------------------------------------------------------------------------------------------------------------------------------------------------|
| Positive                  | Target call positive, IC call positive or negative.                                                                                                                                                                                                                              |
| Negative                  | Target call negative, IC call positive.                                                                                                                                                                                                                                          |
| Invalid                   | Target call negative, IC call negative.                                                                                                                                                                                                                                          |
| Inconsistent              | One of the following result combinations applies: <ul style="list-style-type: none"> <li>▶ Target replicate calls positive and negative, independent of IC replicate calls.</li> <li>▶ All Target replicate calls negative, IC replicate calls positive and negative.</li> </ul> |

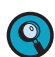

A combined call heat map only displays the samples contained in the sample list. Samples not in the list (that is, cleared wells and removed samples and genes) are displayed in white. Controls and Standards, if applicable, display combined call N/A.

To display the sample name and the gene name for each sample, you can enlarge the heat map to fill the entire working area using the  button.

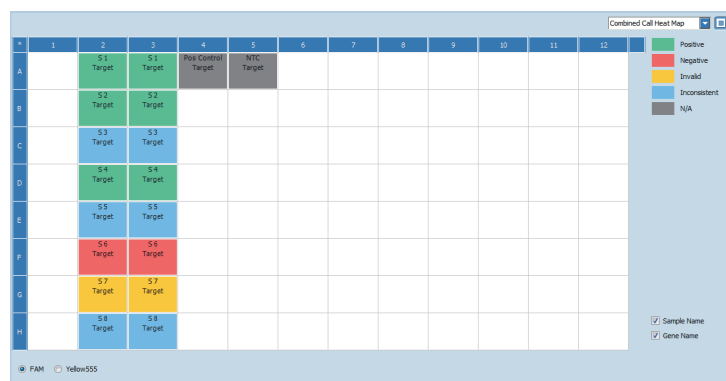

This example shows the combined call result types of all samples contained in the sample list:

- ▶ The samples *A2*, *A3*, *B2*, *B3*, *D2*, and *D3* are green, that is, *Positive*.
- ▶ The samples *F2* and *F3* are red, that is, *Negative*.
- ▶ The samples *G2* and *G3* are yellow, that is, *Invalid*.
- ▶ The samples *C2*, *C3*, *E2*, *E3*, *H2*, and *H3* are blue, that is, *Inconsistent*.
- ▶ The samples *A4* and *A5* are gray, that is, *N/A* (not available).

### 4.5.6 Result table

The result table displays the qualitative calls based on the combination of a *Target* gene call and an *IC* gene call (positive, negative, invalid, or inconsistent).

| Result Table |           |                  |       |          |                 |                                                   |
|--------------|-----------|------------------|-------|----------|-----------------|---------------------------------------------------|
| Sample Name  | Gene Name | Gene Type        | Cq    | Call     | Combined Result | Failure                                           |
| S 2          | Target    | Target           | 27.18 | Positive | Positive        | None                                              |
| S 2          | IC        | Internal Control | -     | Negative | N/A             | None                                              |
| S 3          | Target    | Target           | 27.22 | Positive | Inconsistent    | Replicate group contains positives and negatives. |
| S 3          | IC        | Internal Control | 26.70 | Positive | N/A             | None                                              |
| S 3          | Target    | Target           | -     | Negative | Inconsistent    | Replicate group contains positives and negatives. |
| S 3          | IC        | Internal Control | 26.57 | Positive | N/A             | None                                              |
| S 4          | Target    | Target           | 27.34 | Positive | Positive        | None                                              |
| S 4          | IC        | Internal Control | 26.67 | Positive | N/A             | Replicate group contains positives and negatives. |
| S 4          | Target    | Target           | 27.60 | Positive | Positive        | None                                              |
| S 4          | IC        | Internal Control | -     | Negative | N/A             | Replicate group contains positives and negatives. |
| S 5          | Target    | Target           | 27.21 | Positive | Inconsistent    | Replicate group contains positives and negatives. |
| S 5          | IC        | Internal Control | -     | Negative | N/A             | None                                              |
| S 5          | Target    | Target           | -     | Negative | Inconsistent    | Replicate group contains positives and negatives. |
| S 5          | IC        | Internal Control | -     | Negative | N/A             | None                                              |
| S 6          | Target    | Target           | -     | Negative | Negative        | None                                              |
| S 6          | IC        | Internal Control | 26.90 | Positive | N/A             | None                                              |
| S 6          | Target    | Target           | -     | Negative | Negative        | None                                              |
| S 6          | IC        | Internal Control | 26.62 | Positive | N/A             | None                                              |

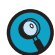

For detailed information on all calculated results displayed in the 'Result Table' view, refer to the *LightCycler® 96 System Operator's Guide*, chapter B, section "Qualitative detection".

1

In the *Result Table* view, check the *Failure* column for the samples with combined call result type *Inconsistent*, that is, the samples C2, C3, E2, E3, H2, and H3.

## 4.6 Exporting result data

You can export the following result data to Microsoft Word or Excel:

- ▶ The result table as a text file.
- ▶ The result graphs as a PNG file, GIF file, or text file.

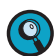

For detailed information on how to export result data, refer to the *LightCycler® 96 System Operator's Guide*, chapter B, section "Exporting analysis results".

## 5 T<sub>m</sub> calling

When performing real-time PCR in the presence of an intercalating dye such as SYBR Green I, the increase in fluorescence is proportional to the amount of newly generated dsDNA. The SYBR Green I dye, however, binds all dsDNA, including specific and non-specific PCR products. This means that the presence of primer-dimers and other non-specific products can affect the quality of real-time PCR data produced using SYBR Green I. This also means that a melting curve analysis after the PCR is essential to verify product identification.

A melting curve analysis in the presence of SYBR Green I identifies PCR products by GC content and length. Both parameters determine the melting temperature (T<sub>m</sub>) of a DNA fragment. Due to their small size, primer-dimers usually melt at a lower temperature than the specific PCR product.

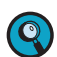

For detailed information, refer to the *LightCycler® 96 System Operator's Guide*, chapter A, sections "Detection formats" and "Analysis principles".

### 5.1 Experiment overview

The following example describes how to set up, run, and analyze a real-time PCR experiment using the SYBR Green I detection format. A T<sub>m</sub> calling analysis for product identification enables the verification of amplification results.

The assay is performed using a LightCycler® 480 Multiwell Plate 96, white. Each sample is set up in duplicate.

|          |                                                                                                                                                                                           |
|----------|-------------------------------------------------------------------------------------------------------------------------------------------------------------------------------------------|
| Samples  | 7 DNA samples (unknown concentration)                                                                                                                                                     |
| Reagents | <ul style="list-style-type: none"> <li>▶ FastStart Essential DNA Green Master (2 x conc.)</li> <li>▶ Primer mix (20 x conc.), containing forward and reverse primer, 5 µM each</li> </ul> |

### 5.2 Setting up the samples

To set up the samples:

- ▶ Include a no template control (NTC), see section [Controls](#) below.
- ▶ Prepare the PCR mix, see section [PCR mix](#), on page 135.
- ▶ Pipette the sample dilution and the PCR mix, see section [Pipetting scheme](#), on page 135.
- ▶ Centrifuge the multiwell plate, see section [Centrifugation](#), on page 135.

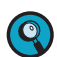

Continuously cool the samples during setup by keeping the tubes on ice.

#### Controls

To ensure the absence of contaminating nucleic acids in PCR reagents, it is highly recommended that you include a no template control (NTC) in your experiment.

## PCR mix



When setting up the PCR mix, compensate for pipetting losses. We recommend preparing PCR mixes with 10% extra volume.

The table below shows the components included in the PCR mix for one 20 µl reaction. The PCR mix volume is 15 µl for a subsequent sample input of 5 µl per reaction.

| Component                                | Concentration | Volume       | Final conc.  |
|------------------------------------------|---------------|--------------|--------------|
| Water, PCR grade                         |               | 4 µl         |              |
| FastStart Essential DNA Green Master     | 2 x conc.     | 10 µl        | 1 x conc.    |
| Primer mix                               | 20 x conc.    | 1 µl         | 0.25 µM each |
| <b>Total volume (without sample DNA)</b> |               | <b>15 µl</b> |              |

## Pipetting scheme

- 1 Pipette 15 µl of the PCR mix into 16 wells of the multiwell plate according to the following scheme.
- 2 Pipette 5 µl of sample into the corresponding wells according to the following scheme.
- 3 For the NTCs, pipette 5 µl of water (instead of DNA sample) into the corresponding wells according to the following scheme.

|   | 1       | 2       | 3 | 4 | 5 | 6 | 7 | 8 | 9 | 10 | 11 | 12 |
|---|---------|---------|---|---|---|---|---|---|---|----|----|----|
| A | NTC     | NTC     |   |   |   |   |   |   |   |    |    |    |
| B | Sample1 | Sample1 |   |   |   |   |   |   |   |    |    |    |
| C | Sample2 | Sample2 |   |   |   |   |   |   |   |    |    |    |
| D | Sample3 | Sample3 |   |   |   |   |   |   |   |    |    |    |
| E | Sample4 | Sample4 |   |   |   |   |   |   |   |    |    |    |
| F | Sample5 | Sample5 |   |   |   |   |   |   |   |    |    |    |
| G | Sample6 | Sample6 |   |   |   |   |   |   |   |    |    |    |
| H | Sample7 | Sample7 |   |   |   |   |   |   |   |    |    |    |

## Centrifugation

- 1 Seal the multiwell plate with the LightCycler<sup>®</sup> 480 Sealing Foil using the sealing foil applicator (provided with the system package).
- 2 Centrifuge the multiwell plate at 1500 x g for 2 minutes in a standard swing-bucket centrifuge, using a rotor for multiwell plates.

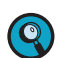

Make sure you balance the multiwell plate with a suitable counterweight (for example, another multiwell plate).

### 5.3 Experiment run parameters



For detailed information on how to program an experiment, see one of the following sections:

[Programming the experiment with the LightCycler® 96 Application Software](#), on page 20.

[Programming the experiment with the LightCycler® 96 Instrument Software](#), on page 32.

For an experiment using SYBR Green I, run a PCR profile including a 3-step amplification program and subsequent melting. The experiment includes the run parameters for the temperature profile, the detection format, and the reaction volume. These parameters are listed in the following tables.

#### Temperature profile



For detailed information on how to program a temperature profile, see the following sections:

For working with the LightCycler® 96 Application Software: [Creating the temperature profile](#), on page 23.

For working with the LightCycler® 96 Instrument Software: [Creating the temperature profile](#), on page 35.

For this example, use the following heating and cooling cycles:

| Programs             |                  | Steps       |              |             |                              |
|----------------------|------------------|-------------|--------------|-------------|------------------------------|
| Name                 | Number of cycles | Ramp (°C/s) | Duration (s) | Target (°C) | Acquisition Mode             |
| Preincubation        | 1                | 4.4         | 600          | 95          | None                         |
| 3-step amplification | 45               | 4.4         | 10           | 95          | None                         |
|                      |                  | 2.2         | 10           | 55          | None                         |
|                      |                  | 4.4         | 10           | 72          | Single                       |
| Melting              | 1                | 4.4         | 5            | 95          | None                         |
|                      |                  | 2.2         | 60           | 65          | None                         |
|                      |                  | -           |              | 97          | Continuous<br>5 readings /°C |
| Cooling              | 1                | 1.0         | 30           | 37          | None                         |

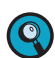

It is not necessary to add a separate cooling program at the end of the run. At the end of each run, the samples are automatically cooled to +37°C.

For the ramp rate for heating and cooling (*Ramp* (°C/s)), the default values are used in this example.

For the steps of the amplification program, the following default settings are used in this example:

- ▶ LightCycler® 96 Application Software: For *Gradient* and *Touch down*, the default settings are used.
- ▶ For *Mode*, the default *Standard* option is used.

In the *Temperature Profile* window area, the following graphical summary of the programs selected for the experiment and their temperature and time settings is displayed.

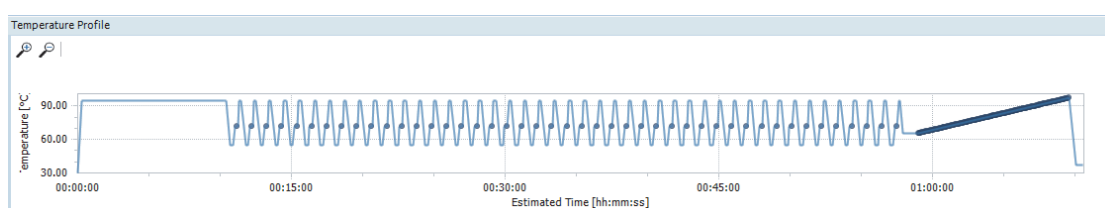

## Detection format

Selecting the dye (SYBR Green I) for this mono-color experiment determines the channel combination for the measurement during the run. For all other parameters, the default values are used in this example.

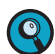

For detailed information on how to specify the detection format, see the following sections:

For working with the LightCycler® 96 Application Software: [To specify the detection format for the experiment](#), on page 27.

For working with the LightCycler® 96 Instrument Software: [To specify the detection format for the experiment](#), on page 40.

For this example, use the following channel:

| Dye          | Channel |
|--------------|---------|
| SYBR Green I | 470/514 |

## Reaction volume

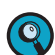

As the LightCycler® 96 Instrument does not validate the reaction volume, ensure that the specified reaction volume matches the volume pipetted into the wells of the multiwell plate.

For detailed information on how to specify the reaction volume, see the following sections:

For working with the LightCycler® 96 Application Software: [To specify the reaction volume for the experiment](#), on page 27.

For working with the LightCycler® 96 Instrument Software: [To specify the reaction volume for the experiment](#), on page 42.

For this example, use the following reaction volume:

| Reaction volume |
|-----------------|
| 20 µl           |

## Experiment run

Once you have set up the samples and defined the experiment run parameters, you can start the run. For detailed information on how to run the experiment, see section [Running the experiment](#), on page 43.

## 5.4 Editing the sample data

For editing the sample data, the experiment must be opened in the LightCycler® 96 Application Software. You can edit the sample list before or after the run, depending on your preferred routine.

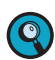

*The LightCycler® 96 Application Software offers two different views for editing the samples: the plate view and the table view. This user training guide describes how to edit the samples using the plate view, which shows the samples in 96 wells laid out to match the physical instrument. Changes in the plate view are immediately displayed in the table view and vice versa.*

*For detailed information on the 'Sample Editor' tab, refer to the LightCycler® 96 System Operator's Guide, chapter B, section "Sample Editor tab".*

To edit the sample list:

- ▶ Clear empty wells to eliminate them from the analysis, see section [Empty wells](#) below.
- ▶ Edit the sample names, see section [Sample names](#), on page 139.
- ▶ Edit the sample types, see section [Sample types](#), on page 139.
- ▶ Assign a gene for the dye, see section [Gene assignment](#), on page 140.

### Empty wells

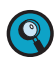

*For detailed information on how to clear empty wells, see section [To clear empty wells](#), on page 51.*

For this example, clear the wells in columns 3 to 12 (see also the multiwell plate image below).

| * | 1            | 2            | 3 | 4 | 5 | 6 | 7 | 8 | 9 | 10 | 11 | 12 |
|---|--------------|--------------|---|---|---|---|---|---|---|----|----|----|
| A | U<br>Samp... | U<br>Samp... |   |   |   |   |   |   |   |    |    |    |
| B | U<br>Samp... | U<br>Samp... |   |   |   |   |   |   |   |    |    |    |
| C | U<br>Samp... | U<br>Samp... |   |   |   |   |   |   |   |    |    |    |
| D | U<br>Samp... | U<br>Samp... |   |   |   |   |   |   |   |    |    |    |
| E | U<br>Samp... | U<br>Samp... |   |   |   |   |   |   |   |    |    |    |
| F | U<br>Samp... | U<br>Samp... |   |   |   |   |   |   |   |    |    |    |
| G | U<br>Samp... | U<br>Samp... |   |   |   |   |   |   |   |    |    |    |
| H | U<br>Samp... | U<br>Samp... |   |   |   |   |   |   |   |    |    |    |

## Sample names



For detailed information on how to edit the sample names, see section [To edit the sample names and the sample types](#), on page 53.

For this example, the following sample names apply (see also the multiwell plate image below):

| Name               | Samples in the plate view                                                      |
|--------------------|--------------------------------------------------------------------------------|
| NTC                | For the negative control in wells A1 and A2.                                   |
| Sample1 to Sample7 | For the unknown samples in rows B to H.<br>Each sample is set up in duplicate. |

|   | 1            | 2            | 3 | 4 | 5 | 6 | 7 | 8 | 9 | 10 | 11 | 12 |
|---|--------------|--------------|---|---|---|---|---|---|---|----|----|----|
| A | U<br>NTC     | U<br>NTC     |   |   |   |   |   |   |   |    |    |    |
| B | U<br>Sample1 | U<br>Sample1 |   |   |   |   |   |   |   |    |    |    |
| C | U<br>Sample2 | U<br>Sample2 |   |   |   |   |   |   |   |    |    |    |
| D | U<br>Sample3 | U<br>Sample3 |   |   |   |   |   |   |   |    |    |    |
| E | U<br>Sample4 | U<br>Sample4 |   |   |   |   |   |   |   |    |    |    |
| F | U<br>Sample5 | U<br>Sample5 |   |   |   |   |   |   |   |    |    |    |
| G | U<br>Sample6 | U<br>Sample6 |   |   |   |   |   |   |   |    |    |    |
| H | U<br>Sample7 | U<br>Sample7 |   |   |   |   |   |   |   |    |    |    |

## Sample types

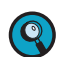

For detailed information on how to edit the sample types, see section [To edit the sample names and the sample types](#), on page 53.

In this example the following sample types apply:

| Type              | Samples in the plate view                        |
|-------------------|--------------------------------------------------|
| Negative control  | For the samples <i>NTC</i>                       |
| Unknown (default) | For the samples <i>Sample1</i> to <i>Sample7</i> |

|   | 1                    | 2                    | 3 | 4 | 5 | 6 | 7 | 8 | 9 | 10 | 11 | 12 |
|---|----------------------|----------------------|---|---|---|---|---|---|---|----|----|----|
| A | U<br>NTC<br>None     | U<br>NTC<br>None     |   |   |   |   |   |   |   |    |    |    |
| B | U<br>Sample1<br>None | U<br>Sample1<br>None |   |   |   |   |   |   |   |    |    |    |
| C | U<br>Sample2<br>None | U<br>Sample2<br>None |   |   |   |   |   |   |   |    |    |    |
| D | U<br>Sample3<br>None | U<br>Sample3<br>None |   |   |   |   |   |   |   |    |    |    |
| E | U<br>Sample4<br>None | U<br>Sample4<br>None |   |   |   |   |   |   |   |    |    |    |
| F | U<br>Sample5<br>None | U<br>Sample5<br>None |   |   |   |   |   |   |   |    |    |    |
| G | U<br>Sample6<br>None | U<br>Sample6<br>None |   |   |   |   |   |   |   |    |    |    |
| H | U<br>Sample7<br>None | U<br>Sample7<br>None |   |   |   |   |   |   |   |    |    |    |

Unknown
Standard
Positive control
Negative control
Non reverse transcription control

Gene assignment

 For detailed information on how to assign a gene to the dye, see section [To assign a gene to the dye\(s\)](#), on page 55.

In this example the following gene assignment applies:

| Gene name | Dye          | Samples in the plate view |
|-----------|--------------|---------------------------|
| Gene 1    | SYBR Green I | For all the samples       |

|   | 1                     | 2                     | 3 | 4 | 5 | 6 | 7 | 8 | 9 | 10 | 11 | 12 |
|---|-----------------------|-----------------------|---|---|---|---|---|---|---|----|----|----|
| A | NTC<br>Gene1          | NTC<br>Gene1          |   |   |   |   |   |   |   |    |    |    |
| B | U<br>Sample1<br>Gene1 | U<br>Sample1<br>Gene1 |   |   |   |   |   |   |   |    |    |    |
| C | U<br>Sample2<br>Gene1 | U<br>Sample2<br>Gene1 |   |   |   |   |   |   |   |    |    |    |
| D | U<br>Sample3<br>Gene1 | U<br>Sample3<br>Gene1 |   |   |   |   |   |   |   |    |    |    |
| E | U<br>Sample4<br>Gene1 | U<br>Sample4<br>Gene1 |   |   |   |   |   |   |   |    |    |    |
| F | U<br>Sample5<br>Gene1 | U<br>Sample5<br>Gene1 |   |   |   |   |   |   |   |    |    |    |
| G | U<br>Sample6<br>Gene1 | U<br>Sample6<br>Gene1 |   |   |   |   |   |   |   |    |    |    |
| H | U<br>Sample7<br>Gene1 | U<br>Sample7<br>Gene1 |   |   |   |   |   |   |   |    |    |    |

## 5.5 Analyzing the results



For detailed information on the 'Analysis' tab, refer to the *LightCycler® 96 System Operator's Guide*, chapter B, section "T<sub>m</sub> Calling".

For detailed information on working with tables and graphs, refer to the *LightCycler® 96 System Operator's Guide*, chapter B, section "General software conventions".

To analyze the calculated results of the T<sub>m</sub> Calling application:

- ▶ Create the Abs Quant analysis and the T<sub>m</sub> Calling analysis, see section [Creating the analysis](#) below.
- ▶ Optional: Specify the melting analysis parameters, see section [Analysis settings](#), on page 143.
- ▶ In the different views of the *Abs Quant* and *T<sub>m</sub> Calling* tabs, check the analysis results and customize the result data if necessary:
  - ▶ On the *Abs Quant* tab, check the amplification curves for plausibility, see section [Amplification curves](#), on page 144.
  - ▶ For the *Melting Curves* view, see section [Melting curves](#), on page 144.
  - ▶ In the *Melting Peaks* view, specify a melting peak area, see section [To specify the melting peak area Area 1](#), on page 145.
  - ▶ For the *Heat Map* view, see section [Heat map](#), on page 146.
  - ▶ In the *Result Table* view, check the melting temperature values, see section [Result table](#), on page 146.

### 5.5.1 Creating the analysis

#### To create the Abs Quant analysis

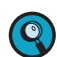

For detailed information on how to create the Abs Quant analysis, see section [To create the Abs Quant analysis](#), on page 68.

#### To create the T<sub>m</sub> Calling analysis

- 1 Open the *Analysis* tab.
- 2 In the tool bar, choose the *Add Analysis* icon to add a new analysis.

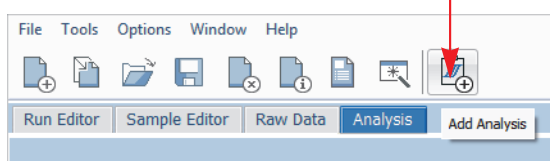

The *Create New Analysis* dialog box opens.

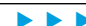

3 Choose *T<sub>m</sub>* Calling.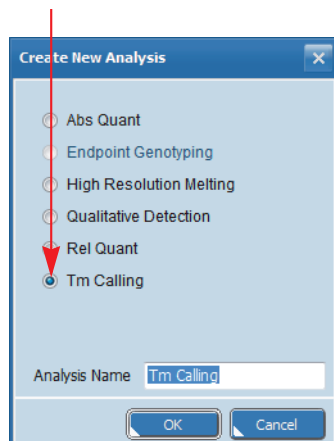4 Choose *OK*.

The *T<sub>m</sub>* Calling tab displays four different views for the experiment using default values:

- ▶ *Melting Curves*
- ▶ *Melting Peaks*
- ▶ *Heat Map*
- ▶ *Result Table*

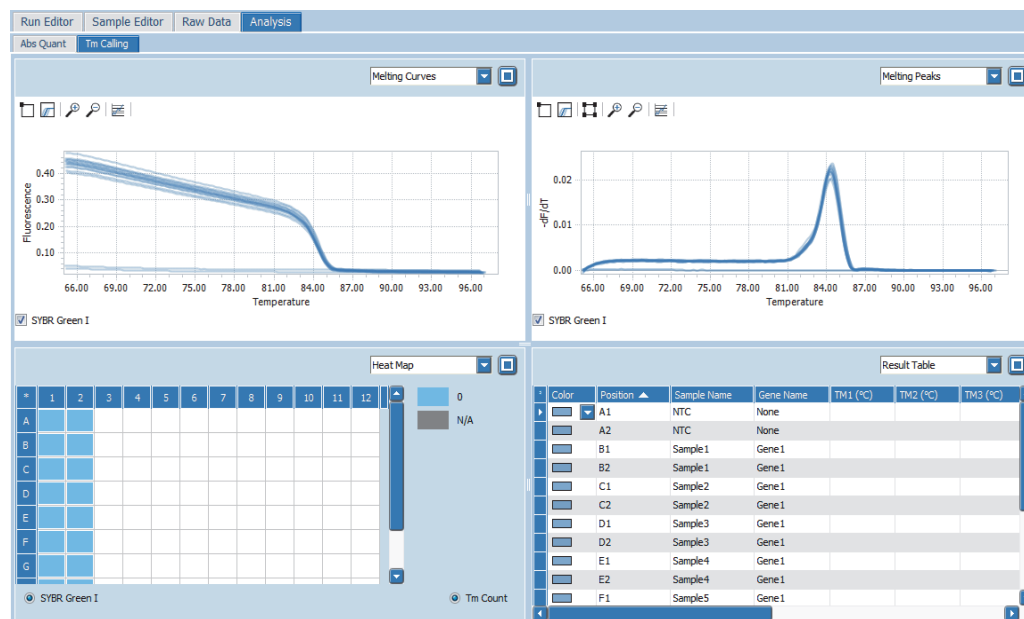

## 5.5.2 Analysis settings

### Optional: To specify the analysis settings

- 1 In the tool bar, choose the *Analysis Settings* icon.

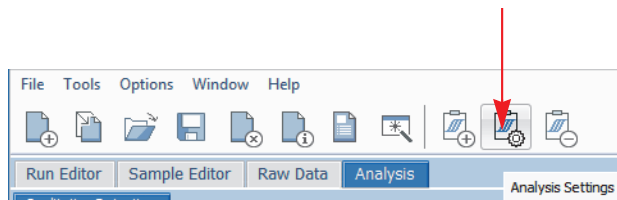

The *Melting Analysis Parameters* dialog box opens.

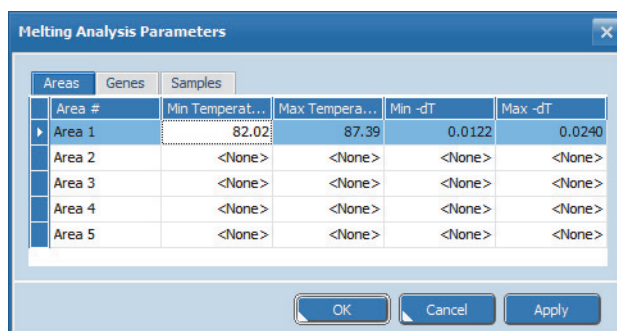

- 2 In the *Melting Analysis Parameters* dialog box, specify the analysis-specific settings, for example:
    - ▶ On the *Areas* tab, specify the areas where melting peaks are to be called. An area is displayed as a rectangle which represents a temperature range and a fluorescence threshold.
-  *The temperature and fluorescence settings in the Melting Analysis Parameters dialog box correspond to the area marking in the Melting Peaks graph. For detailed information, see section [Melting peaks](#), on page 145.*
- ▶ On the *Genes* tab, remove a gene from the analysis.
  - ▶ On the *Samples* tab, remove samples from the analysis.

### 5.5.3 Amplification curves

On the *Abs Quant* tab, amplification curves display the fluorescence intensity against the number of cycles in the amplification program. An amplification curves graph is only available when an amplification program has been performed.

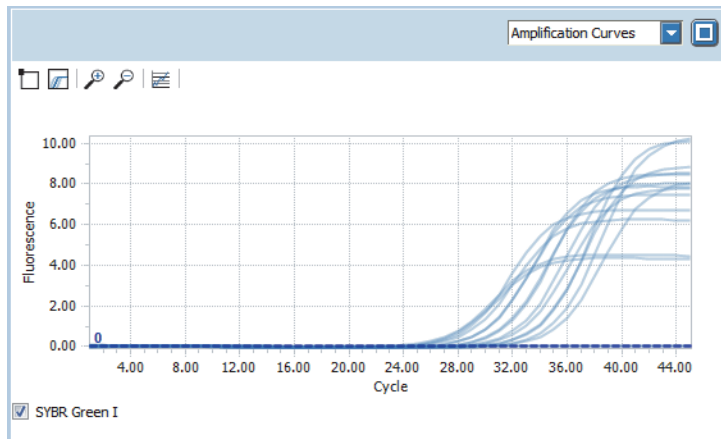

- 1 Check the *Amplification Curves* chart for correct amplification.
- 2 Optional: For better distinction, customize the y axis scaling.  
For detailed information on how to modify the scaling of the y axis, see section [Optional: To modify the y axis scaling](#), on page 71.

### 5.5.4 Melting curves

On the *T<sub>m</sub> Calling* tab, melting curves show the raw fluorescence intensity against the temperature in °C.

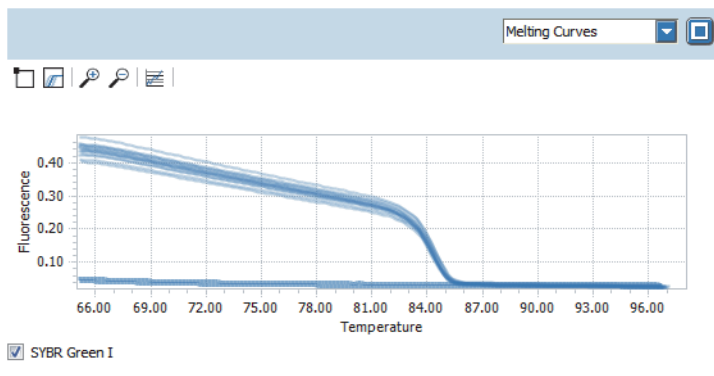

- 1 Optional: For better distinction, customize the y axis scaling.  
For detailed information on how to modify the scaling of the y axis, see section [Optional: To modify the y axis scaling](#), on page 71.

### 5.5.5 Melting peaks

The melting peaks graph displays the first negative derivative of the fluorescence with respect to the temperature in the melting program ( $-dF/dT$ ). The graph shows a single melting peak, meaning that no additional by-products are detected in the experiment.

- 1 Optional: For better distinction, customize the y axis scaling. For detailed information on how to modify the scaling of the y axis, see section [Optional: To modify the y axis scaling](#), on page 71.

#### To specify the melting peak area Area 1

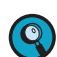

The area marking in the melting peaks graph corresponds to the settings on the 'Areas' tab in the 'Melting Analysis Parameters' dialog box, see section [Analysis settings](#), on page 143.

- 1 In the *Melting Peaks* view, choose *Area Marker* to indicate that a marking action follows.

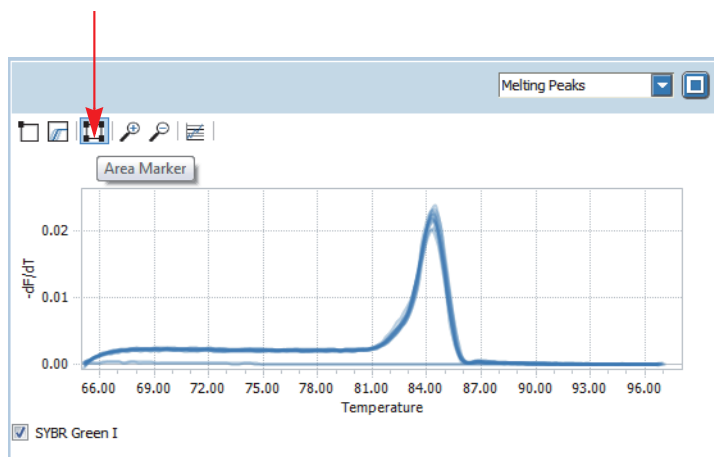

- 2 To specify the melting peak area *Area 1*:
  - Move the cursor to the point for the top left corner of the area.
  - Hold down the left mouse button and drag the cursor to the point for the bottom right corner of the area.
  - Release the mouse button.

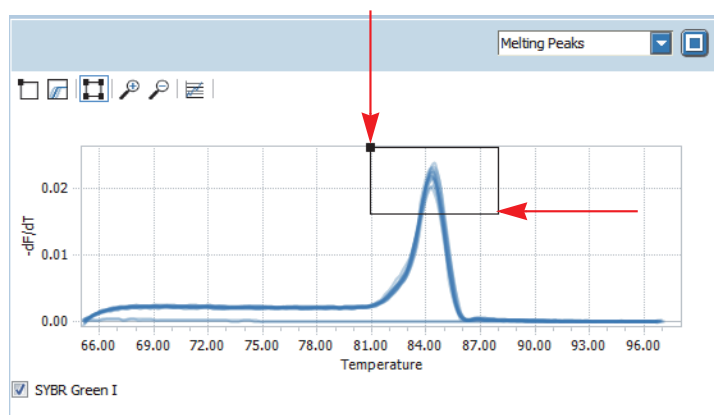

- To change the size of the specified area, grab the relevant side or corner of the rectangle and drag it accordingly.

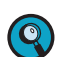

The *LightCycler*® 96 Application Software allows five areas to be defined in one graph. To specify an additional area, one of the existing areas must be deleted.

### 5.5.6 Heat map

The heat map shows the melting temperatures for the melting peak area *Area 1*.

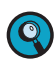

A heat map only displays the samples contained in the sample list. Samples not in the list (that is, cleared wells and removed samples and genes) are displayed in white and samples excluded from calculation are displayed in gray.

To display the sample name and the gene name for each sample, you can enlarge the heat map to fill the entire working area using the button.

All samples for which the melting peak lies in the melting peak area *Area 1* are assigned the corresponding area number *1* and the color magenta, in this example the samples B1 to H2.

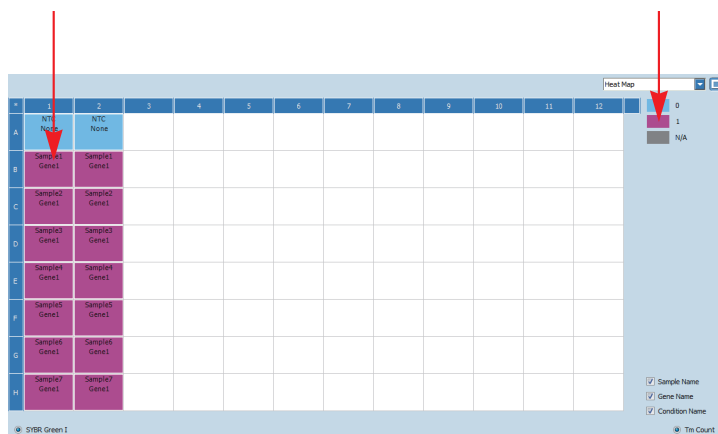

### 5.5.7 Result table

The result table displays the results of the T<sub>m</sub> calling analysis. The TM1(°C) column shows the melting temperature (T<sub>m</sub>) of any peak identified in *Area 1* in the melting peaks graph. Where no peak is present, the table cells are blank.

|    | Color | Position ▲ | Sample Name | Gene Name | TM1 (°C) | TM2 (°C) | TM3 (°C) |
|----|-------|------------|-------------|-----------|----------|----------|----------|
| A1 |       | A1         | NTC         | None      |          |          |          |
| A2 |       | A2         | NTC         | None      |          |          |          |
| B1 |       | B1         | Sample1     | Gene1     | 84.43    |          |          |
| B2 |       | B2         | Sample1     | Gene1     | 84.30    |          |          |
| C1 |       | C1         | Sample2     | Gene1     | 84.44    |          |          |
| C2 |       | C2         | Sample2     | Gene1     | 84.33    |          |          |
| D1 |       | D1         | Sample3     | Gene1     | 84.39    |          |          |
| D2 |       | D2         | Sample3     | Gene1     | 84.22    |          |          |
| E1 |       | E1         | Sample4     | Gene1     | 84.44    |          |          |
| E2 |       | E2         | Sample4     | Gene1     | 84.28    |          |          |

## 5.6 Exporting result data

You can export the following result data to Microsoft Word or Excel:

- ▶ The result table as a text file.
- ▶ The result graphs as a PNG file, GIF file, or text file.

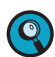

For detailed information on how to export result data, refer to the *LightCycler® 96 System Operator's Guide*, chapter B, section "Exporting analysis results".

## 6 High resolution melting

High resolution melting is a post-PCR method for screening unknown genetic variations (SNPs, mutations, methylation). Double-stranded PCR products are analyzed based on their melting behavior with increasing temperatures. Special intercalating dyes are used for the detection of the variations (for example, ResoLight dye). The PCR product is gradually denatured and releases the intercalating dye. The decreasing fluorescence is continuously measured and plotted against increasing temperature.

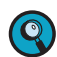

*For detailed information on high resolution melting analysis, refer to the LightCycler® 96 System Operator's Guide, chapter A, section "Analysis principles".*

### 6.1 Experiment overview

The example below describes how to set up, run, and analyze a high resolution melting analysis. ResoLight is used as the intercalating dye.

The assay is performed using a LightCycler® 480 Multiwell Plate 96, white. The no template control (NTC) is set up as a duplicate.

|          |                                                                                                                                                       |
|----------|-------------------------------------------------------------------------------------------------------------------------------------------------------|
| Samples  | ▶ 46 human genomic DNA samples, isolated with the MagNA Pure LC 2.0 Instrument (concentration approximately 90 ng/μl).                                |
| Reagents | ▶ LightCycler® 480 High Resolution Melting Master Cat. No. 04 909 631 001<br>▶ Primers specific for <i>mdr1</i><br>▶ Primers specific for <i>add1</i> |

### 6.2 Setting up the samples

#### Sample dilution

The samples are diluted to approximately 4 ng/μl.

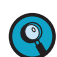

*Continuously cool the samples during setup by keeping the reaction tubes on ice.*

#### Controls

To ensure an accurate high resolution melting analysis, it is highly recommended that you include an NTC in your experiment.

**PCR mix for the *mdr1* gene**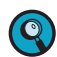

When setting up the PCR mix, compensate for pipetting losses. We recommend preparing PCR mixes with 10% extra volume.

The table below shows the components included in the PCR mix for one 20 µl reaction. The PCR mix volume is 17 µl for a subsequent sample input of 3 µl/reaction.

| Component                                | Concentration | Volume       | Final conc. |
|------------------------------------------|---------------|--------------|-------------|
| Water, PCR grade                         |               | 3.4 µl       |             |
| HRM Master Mix                           | 2 x conc.     | 10 µl        | 1 x conc.   |
| Forward primer <i>mdr1</i>               | 10 µM         | 0.8 µl       | 0.4 µM      |
| Reverse primer <i>mdr1</i>               | 10 µM         | 0.8 µl       | 0.4 µM      |
| MgCl <sub>2</sub>                        | 25 mM         | 2 µl         | 2.5 mM      |
| <b>Total volume (without sample DNA)</b> |               | <b>17 µl</b> |             |

**PCR mix for the *add1* gene**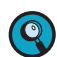

When setting up the PCR mix, compensate for pipetting losses. We recommend preparing PCR mixes with 10% extra volume.

The table below shows the components included in the PCR mix for one 20 µl reaction. The PCR mix volume is 17 µl for a subsequent sample input of 3 µl/reaction.

| Component                                | Concentration | Volume       | Final conc. |
|------------------------------------------|---------------|--------------|-------------|
| Water, PCR grade                         |               | 3.4 µl       |             |
| HRM Master Mix                           | 2 x conc.     | 10 µl        | 1 x conc.   |
| Forward primer <i>add1</i>               | 10 µM         | 0.8 µl       | 0.4 µM      |
| Reverse primer <i>add1</i>               | 10 µM         | 0.8 µl       | 0.4 µM      |
| MgCl <sub>2</sub>                        | 25 mM         | 2 µl         | 2.5 mM      |
| <b>Total volume (without sample DNA)</b> |               | <b>17 µl</b> |             |

**Pipetting scheme**

- 1 Pipette 17 µl of the PCR mix for the *mdr1* gene into wells A1 to D12 of the multiwell plate.
- 2 Pipette 17 µl of the PCR mix for the *add1* gene into wells E1 to H12 of the multiwell plate.
- 3 Pipette 3 µl of sample dilution into the PCR mix in the corresponding wells, according to the following scheme.
- 4 For the two NTCs, pipette 3 µl of water (instead of DNA sample) into the corresponding wells, according to the following scheme (each in duplicate).

|   | 1         | 2         | 3         | 4         | 5         | 6         | 7         | 8         | 9         | 10        | 11        | 12        |
|---|-----------|-----------|-----------|-----------|-----------|-----------|-----------|-----------|-----------|-----------|-----------|-----------|
| A | Sample 1  | Sample 2  | Sample 3  | Sample 4  | Sample 5  | Sample 6  | Sample 7  | Sample 8  | Sample 9  | Sample 10 | Sample 11 | Sample 12 |
| B | Sample 13 | Sample 14 | Sample 15 | Sample 16 | Sample 17 | Sample 18 | Sample 19 | Sample 20 | Sample 21 | Sample 22 | Sample 23 | Sample 24 |
| C | Sample 25 | Sample 26 | Sample 27 | Sample 28 | Sample 29 | Sample 30 | Sample 31 | Sample 32 | Sample 33 | Sample 34 | Sample 35 | Sample 36 |
| D | Sample 37 | Sample 38 | Sample 39 | Sample 40 | Sample 41 | Sample 42 | Sample 43 | Sample 44 | Sample 45 | Sample 46 | NTC       | NTC       |
| E | Sample 1  | Sample 2  | Sample 3  | Sample 4  | Sample 5  | Sample 6  | Sample 7  | Sample 8  | Sample 9  | Sample 10 | Sample 11 | Sample 12 |
| F | Sample 13 | Sample 14 | Sample 15 | Sample 16 | Sample 17 | Sample 18 | Sample 19 | Sample 20 | Sample 21 | Sample 22 | Sample 23 | Sample 24 |
| G | Sample 25 | Sample 26 | Sample 27 | Sample 28 | Sample 29 | Sample 30 | Sample 31 | Sample 32 | Sample 33 | Sample 34 | Sample 35 | Sample 36 |
| H | Sample 37 | Sample 38 | Sample 39 | Sample 40 | Sample 41 | Sample 42 | Sample 43 | Sample 44 | Sample 45 | Sample 46 | NTC       | NTC       |

## Centrifugation

- 1 Seal the multiwell plate with the LightCycler® 480 Sealing Foil using the sealing foil applicator (provided with the system package).
- 2 Centrifuge the multiwell plate at 1500 x *g* for 2 minutes in a standard swing-bucket centrifuge, using a rotor for multiwell plates.
 



*Make sure you balance the multiwell plate with a suitable counterweight (for example, another multiwell plate).*

### 6.3 Experiment run parameters



For detailed information on how to program an experiment, see one of the following sections:

[Programming the experiment with the LightCycler® 96 Application Software](#), on page 20.

[Programming the experiment with the LightCycler® 96 Instrument Software](#), on page 32.

For the experiment, run a PCR profile including a 3-step amplification program and subsequent high resolution melting.

The experiment includes the run parameters listed in the following tables.

#### Temperature profile

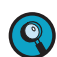

For detailed information on how to program a temperature profile, see one of the following sections:

For working with the LightCycler® 96 Application Software: [Creating the temperature profile](#), on page 23.

For working with the LightCycler® 96 Instrument Software: [Creating the temperature profile](#), on page 35.

For this example, use the following heating cycles:

| Programs                |                  | Steps       |              |             |                              |
|-------------------------|------------------|-------------|--------------|-------------|------------------------------|
| Name                    | Number of cycles | Ramp (°C/s) | Duration (s) | Target (°C) | Acquisition Mode             |
| Preincubation           | 1                | 4.4         | 600          | 95          | None                         |
| 3 Step Amplification    | 45               | 4.4         | 10           | 95          | None                         |
|                         |                  | 2.2         | 15           | 60          | None                         |
|                         |                  | 4.4         | 15           | 72          | Single                       |
| High Resolution Melting | 1                | 4.4         | 60           | 95          | None                         |
|                         |                  | 2.2         | 60           | 40          | None                         |
|                         |                  | 2.2         | 1            | 65          | None                         |
|                         |                  | -           |              | 97          | Continuous<br>15 readings/°C |

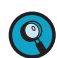

It is not necessary to add a separate cooling program at the end of the run. At the end of each run, the samples are automatically cooled to +37°C.

For the ramp rate for heating (*Ramp* (°C/s)), the default values are used in this example.

For *Mode*, the default *Standard* option is used.

In the *Temperature Profile* window area, the following graphical summary of the programs selected for the experiment and their temperature and time settings is displayed.

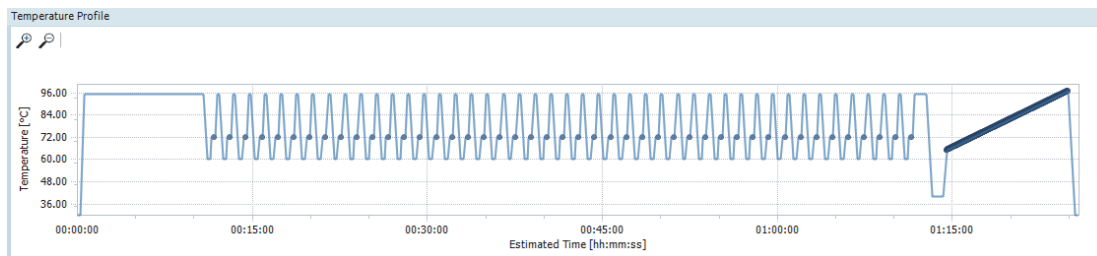

### Detection format

Selecting the dye for this mono-color experiment determines the channel combination for the measurement during the run. For all other parameters, the default values are used in this example.

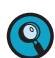

For detailed information on how to specify the detection format, see the following sections:  
For working with the LightCycler® 96 Application Software: [To specify the detection format for the experiment](#), on page 27.  
For working with the LightCycler® 96 Instrument Software: [To specify the detection format for the experiment](#), on page 40.

For this example, use the following channel:

| Dye       | Channel |
|-----------|---------|
| ResoLight | 470/514 |

### Reaction volume

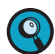

As the LightCycler® 96 Instrument does not validate the reaction volume, ensure that the specified reaction volume matches the volume pipetted into the wells of the multiwell plate.

For detailed information on how to specify the reaction volume, see one of the following sections:  
For working with the LightCycler® 96 Application Software: [To specify the reaction volume for the experiment](#), on page 27.  
For working with the LightCycler® 96 Instrument Software: [To specify the reaction volume for the experiment](#), on page 42.

For this example, use the following reaction volume:

| Reaction volume |
|-----------------|
| 20 µl           |

### Experiment run

Once you have set up the samples and defined the experiment run parameters, you can start the run. For detailed information on how to run the experiment, see section [Running the experiment](#), on page 43.

## 6.4 Editing the sample data

For editing the sample data, the experiment must be opened in the LightCycler® 96 Application Software. You can edit the sample list before or after the run, depending on your preferred routine.

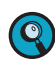

*The LightCycler® 96 Application Software offers two different views for editing the samples: the plate view and the table view. This user training guide describes how to edit the samples using the plate view, which shows the samples in 96 wells laid out to match the physical instrument. Changes in the plate view are immediately displayed in the table view and vice versa.*

*For detailed information on the 'Sample Editor' tab, refer to the LightCycler® 96 System Operator's Guide, chapter B, section "Sample Editor tab".*

To edit the sample list:

- ▶ Edit the sample names, see section [Sample names](#), below.
- ▶ Edit the sample types, see section [Sample types](#), on page 153.
- ▶ Assign the genes to the dye, see section [Gene assignment](#), on page 154.
- ▶ Check if the replicate groups are correctly assigned to all samples, see section [Replicate groups](#), on page 154.

### Sample names

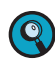

*For detailed information on how to edit the sample names, see section [To edit the sample names and the sample types](#), on page 53.*

For this example, the following sample names apply (see also the multiwell plate image below):

| Name                 | Samples in the plate view                                         |
|----------------------|-------------------------------------------------------------------|
| Sample1 to Sample 46 | For the unknown samples in wells A1 to D10 and in wells E1 to H10 |
| NTC                  | For the negative control in wells D11, D12, H11, and H12          |

| * | 1                      | 2                      | 3                      | 4                      | 5                      | 6                      | 7                      | 8                      | 9                      | 10                     | 11                     | 12                     |
|---|------------------------|------------------------|------------------------|------------------------|------------------------|------------------------|------------------------|------------------------|------------------------|------------------------|------------------------|------------------------|
| A | U<br>Sample 1<br>None  | U<br>Sample 2<br>None  | U<br>Sample 3<br>None  | U<br>Sample 4<br>None  | U<br>Sample 5<br>None  | U<br>Sample 6<br>None  | U<br>Sample 7<br>None  | U<br>Sample 8<br>None  | U<br>Sample 9<br>None  | U<br>Sample 10<br>None | U<br>Sample 11<br>None | U<br>Sample 12<br>None |
| B | U<br>Sample 13<br>None | U<br>Sample 14<br>None | U<br>Sample 15<br>None | U<br>Sample 16<br>None | U<br>Sample 17<br>None | U<br>Sample 18<br>None | U<br>Sample 19<br>None | U<br>Sample 20<br>None | U<br>Sample 21<br>None | U<br>Sample 22<br>None | U<br>Sample 23<br>None | U<br>Sample 24<br>None |
| C | U<br>Sample 25<br>None | U<br>Sample 26<br>None | U<br>Sample 27<br>None | U<br>Sample 28<br>None | U<br>Sample 29<br>None | U<br>Sample 30<br>None | U<br>Sample 31<br>None | U<br>Sample 32<br>None | U<br>Sample 33<br>None | U<br>Sample 34<br>None | U<br>Sample 35<br>None | U<br>Sample 36<br>None |
| D | U<br>Sample 37<br>None | U<br>Sample 38<br>None | U<br>Sample 39<br>None | U<br>Sample 40<br>None | U<br>Sample 41<br>None | U<br>Sample 42<br>None | U<br>Sample 43<br>None | U<br>Sample 44<br>None | U<br>Sample 45<br>None | U<br>Sample 46<br>None | U<br>NTC<br>None       | U<br>NTC<br>None       |
| E | U<br>Sample 1<br>None  | U<br>Sample 2<br>None  | U<br>Sample 3<br>None  | U<br>Sample 4<br>None  | U<br>Sample 5<br>None  | U<br>Sample 6<br>None  | U<br>Sample 7<br>None  | U<br>Sample 8<br>None  | U<br>Sample 9<br>None  | U<br>Sample 10<br>None | U<br>Sample 11<br>None | U<br>Sample 12<br>None |
| F | U<br>Sample 13<br>None | U<br>Sample 14<br>None | U<br>Sample 15<br>None | U<br>Sample 16<br>None | U<br>Sample 17<br>None | U<br>Sample 18<br>None | U<br>Sample 19<br>None | U<br>Sample 20<br>None | U<br>Sample 21<br>None | U<br>Sample 22<br>None | U<br>Sample 23<br>None | U<br>Sample 24<br>None |
| G | U<br>Sample 25<br>None | U<br>Sample 26<br>None | U<br>Sample 27<br>None | U<br>Sample 28<br>None | U<br>Sample 29<br>None | U<br>Sample 30<br>None | U<br>Sample 31<br>None | U<br>Sample 32<br>None | U<br>Sample 33<br>None | U<br>Sample 34<br>None | U<br>Sample 35<br>None | U<br>Sample 36<br>None |
| H | U<br>Sample 37<br>None | U<br>Sample 38<br>None | U<br>Sample 39<br>None | U<br>Sample 40<br>None | U<br>Sample 41<br>None | U<br>Sample 42<br>None | U<br>Sample 43<br>None | U<br>Sample 44<br>None | U<br>Sample 45<br>None | U<br>Sample 46<br>None | U<br>NTC<br>None       | U<br>NTC<br>None       |

## Sample types



For detailed information on how to edit the sample types, see section [To edit the sample names and the sample types](#), on page 53.

In this example the following sample types apply:

| Type              | Samples in the plate view                         |
|-------------------|---------------------------------------------------|
| Unknown (default) | For the samples <i>Sample1</i> to <i>Sample46</i> |
| Negative control  | For the samples <i>NTC</i>                        |

| * | 1                      | 2                      | 3                      | 4                      | 5                      | 6                      | 7                      | 8                      | 9                      | 10                     | 11                     | 12                     |
|---|------------------------|------------------------|------------------------|------------------------|------------------------|------------------------|------------------------|------------------------|------------------------|------------------------|------------------------|------------------------|
| A | U<br>Sample 1<br>None  | U<br>Sample 2<br>None  | U<br>Sample 3<br>None  | U<br>Sample 4<br>None  | U<br>Sample 5<br>None  | U<br>Sample 6<br>None  | U<br>Sample 7<br>None  | U<br>Sample 8<br>None  | U<br>Sample 9<br>None  | U<br>Sample 10<br>None | U<br>Sample 11<br>None | U<br>Sample 12<br>None |
| B | U<br>Sample 13<br>None | U<br>Sample 14<br>None | U<br>Sample 15<br>None | U<br>Sample 16<br>None | U<br>Sample 17<br>None | U<br>Sample 18<br>None | U<br>Sample 19<br>None | U<br>Sample 20<br>None | U<br>Sample 21<br>None | U<br>Sample 22<br>None | U<br>Sample 23<br>None | U<br>Sample 24<br>None |
| C | U<br>Sample 25<br>None | U<br>Sample 26<br>None | U<br>Sample 27<br>None | U<br>Sample 28<br>None | U<br>Sample 29<br>None | U<br>Sample 30<br>None | U<br>Sample 31<br>None | U<br>Sample 32<br>None | U<br>Sample 33<br>None | U<br>Sample 34<br>None | U<br>Sample 35<br>None | U<br>Sample 36<br>None |
| D | U<br>Sample 37<br>None | U<br>Sample 38<br>None | U<br>Sample 39<br>None | U<br>Sample 40<br>None | U<br>Sample 41<br>None | U<br>Sample 42<br>None | U<br>Sample 43<br>None | U<br>Sample 44<br>None | U<br>Sample 45<br>None | U<br>Sample 46<br>None | -<br>NTC<br>None       | -<br>NTC<br>None       |
| E | U<br>Sample 1<br>None  | U<br>Sample 2<br>None  | U<br>Sample 3<br>None  | U<br>Sample 4<br>None  | U<br>Sample 5<br>None  | U<br>Sample 6<br>None  | U<br>Sample 7<br>None  | U<br>Sample 8<br>None  | U<br>Sample 9<br>None  | U<br>Sample 10<br>None | U<br>Sample 11<br>None | U<br>Sample 12<br>None |
| F | U<br>Sample 13<br>None | U<br>Sample 14<br>None | U<br>Sample 15<br>None | U<br>Sample 16<br>None | U<br>Sample 17<br>None | U<br>Sample 18<br>None | U<br>Sample 19<br>None | U<br>Sample 20<br>None | U<br>Sample 21<br>None | U<br>Sample 22<br>None | U<br>Sample 23<br>None | U<br>Sample 24<br>None |
| G | U<br>Sample 25<br>None | U<br>Sample 26<br>None | U<br>Sample 27<br>None | U<br>Sample 28<br>None | U<br>Sample 29<br>None | U<br>Sample 30<br>None | U<br>Sample 31<br>None | U<br>Sample 32<br>None | U<br>Sample 33<br>None | U<br>Sample 34<br>None | U<br>Sample 35<br>None | U<br>Sample 36<br>None |
| H | U<br>Sample 37<br>None | U<br>Sample 38<br>None | U<br>Sample 39<br>None | U<br>Sample 40<br>None | U<br>Sample 41<br>None | U<br>Sample 42<br>None | U<br>Sample 43<br>None | U<br>Sample 44<br>None | U<br>Sample 45<br>None | U<br>Sample 46<br>None | -<br>NTC<br>None       | -<br>NTC<br>None       |

Unknown
Standard
Positive control
Negative control
Non reverse transcription control

## Gene assignment



For detailed information on how to assign a gene to the dye, see section [To assign a gene to the dye\(s\)](#), on page 55.

In this example the following gene assignment applies:

| Gene name | Dye       | Samples in the plate view          |
|-----------|-----------|------------------------------------|
| mdr1      | ResoLight | For the samples in the rows A to D |
| add1      | ResoLight | For the samples in the rows E to H |

|   | 1                      | 2                      | 3                      | 4                      | 5                      | 6                      | 7                      | 8                      | 9                      | 10                     | 11                     | 12                     |
|---|------------------------|------------------------|------------------------|------------------------|------------------------|------------------------|------------------------|------------------------|------------------------|------------------------|------------------------|------------------------|
| A | U<br>Sample 1<br>mdr1  | U<br>Sample 2<br>mdr1  | U<br>Sample 3<br>mdr1  | U<br>Sample 4<br>mdr1  | U<br>Sample 5<br>mdr1  | U<br>Sample 6<br>mdr1  | U<br>Sample 7<br>mdr1  | U<br>Sample 8<br>mdr1  | U<br>Sample 9<br>mdr1  | U<br>Sample 10<br>mdr1 | U<br>Sample 11<br>mdr1 | U<br>Sample 12<br>mdr1 |
| B | U<br>Sample 13<br>mdr1 | U<br>Sample 14<br>mdr1 | U<br>Sample 15<br>mdr1 | U<br>Sample 16<br>mdr1 | U<br>Sample 17<br>mdr1 | U<br>Sample 18<br>mdr1 | U<br>Sample 19<br>mdr1 | U<br>Sample 20<br>mdr1 | U<br>Sample 21<br>mdr1 | U<br>Sample 22<br>mdr1 | U<br>Sample 23<br>mdr1 | U<br>Sample 24<br>mdr1 |
| C | U<br>Sample 25<br>mdr1 | U<br>Sample 26<br>mdr1 | U<br>Sample 27<br>mdr1 | U<br>Sample 28<br>mdr1 | U<br>Sample 29<br>mdr1 | U<br>Sample 30<br>mdr1 | U<br>Sample 31<br>mdr1 | U<br>Sample 32<br>mdr1 | U<br>Sample 33<br>mdr1 | U<br>Sample 34<br>mdr1 | U<br>Sample 35<br>mdr1 | U<br>Sample 36<br>mdr1 |
| D | U<br>Sample 37<br>mdr1 | U<br>Sample 38<br>mdr1 | U<br>Sample 39<br>mdr1 | U<br>Sample 40<br>mdr1 | U<br>Sample 41<br>mdr1 | U<br>Sample 42<br>mdr1 | U<br>Sample 43<br>mdr1 | U<br>Sample 44<br>mdr1 | U<br>Sample 45<br>mdr1 | U<br>Sample 46<br>mdr1 | NTC<br>mdr1            | NTC<br>mdr1            |
| E | U<br>Sample 1<br>add1  | U<br>Sample 2<br>add1  | U<br>Sample 3<br>add1  | U<br>Sample 4<br>add1  | U<br>Sample 5<br>add1  | U<br>Sample 6<br>add1  | U<br>Sample 7<br>add1  | U<br>Sample 8<br>add1  | U<br>Sample 9<br>add1  | U<br>Sample 10<br>add1 | U<br>Sample 11<br>add1 | U<br>Sample 12<br>add1 |
| F | U<br>Sample 13<br>add1 | U<br>Sample 14<br>add1 | U<br>Sample 15<br>add1 | U<br>Sample 16<br>add1 | U<br>Sample 17<br>add1 | U<br>Sample 18<br>add1 | U<br>Sample 19<br>add1 | U<br>Sample 20<br>add1 | U<br>Sample 21<br>add1 | U<br>Sample 22<br>add1 | U<br>Sample 23<br>add1 | U<br>Sample 24<br>add1 |
| G | U<br>Sample 25<br>add1 | U<br>Sample 26<br>add1 | U<br>Sample 27<br>add1 | U<br>Sample 28<br>add1 | U<br>Sample 29<br>add1 | U<br>Sample 30<br>add1 | U<br>Sample 31<br>add1 | U<br>Sample 32<br>add1 | U<br>Sample 33<br>add1 | U<br>Sample 34<br>add1 | U<br>Sample 35<br>add1 | U<br>Sample 36<br>add1 |
| H | U<br>Sample 37<br>add1 | U<br>Sample 38<br>add1 | U<br>Sample 39<br>add1 | U<br>Sample 40<br>add1 | U<br>Sample 41<br>add1 | U<br>Sample 42<br>add1 | U<br>Sample 43<br>add1 | U<br>Sample 44<br>add1 | U<br>Sample 45<br>add1 | U<br>Sample 46<br>add1 | NTC<br>add1            | NTC<br>add1            |

## Replicate groups

The LightCycler® 96 Application Software automatically groups samples into replicate groups, provided they have identical values for the following properties:

- ▶ Sample name
- ▶ Sample type
- ▶ Concentration
- ▶ Gene name

Each replicate group is named according to the top leftmost of the grouped samples.

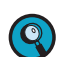

Changing one of these properties removes the corresponding sample from the replicate group.

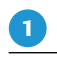

1 Check if the multiwell plate image displays the same replicate groups for the NTCs.

## 6.5 Analyzing the results



For detailed information on the 'Analysis' tab, refer to the *LightCycler® 96 System Operator's Guide*, chapter B, section "High Resolution Melting".

For detailed information on working with tables and graphs, refer to the *LightCycler® 96 System Operator's Guide*, chapter B, section "General software conventions".

To analyze the results of the high resolution melting run:

- ▶ Create a high resolution melting analysis for each gene, see section [Creating the analysis](#), below.
- ▶ Optional: Specify the settings for the high resolution melting analysis, see section [Analysis settings](#), on page 158.
- ▶ In the different views of the *HRM* tab, check the analysis results for each gene and customize the result data, if necessary:
  - ▶ In the *Melting Curves* view, customize the pre-melting range, the post-melting range, the normalization method, and the Pos/Neg threshold, see section [Melting curves](#), on page 159.
  - ▶ In the *Normalized Melting Curves* view, optionally apply a temperature shift to all data, see section [Normalized melting curves](#), on page 161.
  - ▶ In the *Normalized Melting Peaks* view, optionally customize the group assignment with a line segment, see section [Normalized melting peaks](#), on page 163.
  - ▶ For the *Result Table* view, see section [Result table](#), on page 164.
  - ▶ In the *Difference Plot* view, optionally select another baseline as the reference, see section [Difference plot](#), on page 165.
  - ▶ For the *Heat Map* view, see section [Heat map](#), on page 168.

### 6.5.1 Creating the analysis

**To create the high resolution melting analysis for the *mdr1* gene**

- 1 Open the *Analysis* tab.
- 2 In the tool bar, choose the *Add Analysis* icon to add a new analysis.

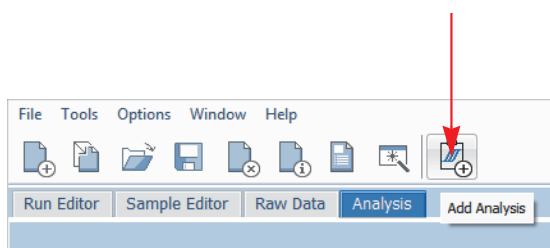

The *Create New Analysis* dialog box opens.

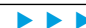

- 3
  - ▶ Choose *High Resolution Melting*.
  - ▶ In *Analysis Name*, enter *HRM mdr1*.
  - ▶ Choose *OK*.

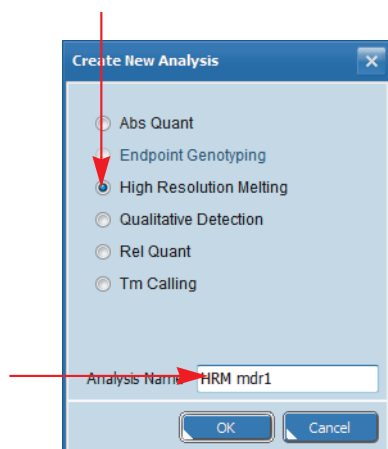

The *Select HRM Gene* dialog box opens.

- 4
  - ▶ From the *Create HRM Analysis for Gene:* drop-down list, choose *mdr1*.
  - ▶ Choose *OK*.

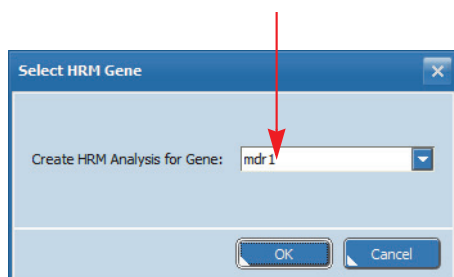

The *HRM mdr1* tab opens.

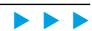

5 The HRM *mdr1* tab displays four different views for the experiment using default values:

- ▶ Melting Curves
- ▶ Normalized Melting Curves
- ▶ Normalized Melting Peaks
- ▶ Result Table

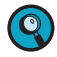

The automated algorithm calculates groups of genotypes based on automated normalization and sensitivity settings. You can overrule the automated calls either by adjusting the algorithm settings or via a manual annotation function which overrules the algorithm group calls. Manual annotation can be performed in the 'Normalized Melting Curves' chart, the 'Normalized Melting Peaks' chart, and the 'Difference Plot'.

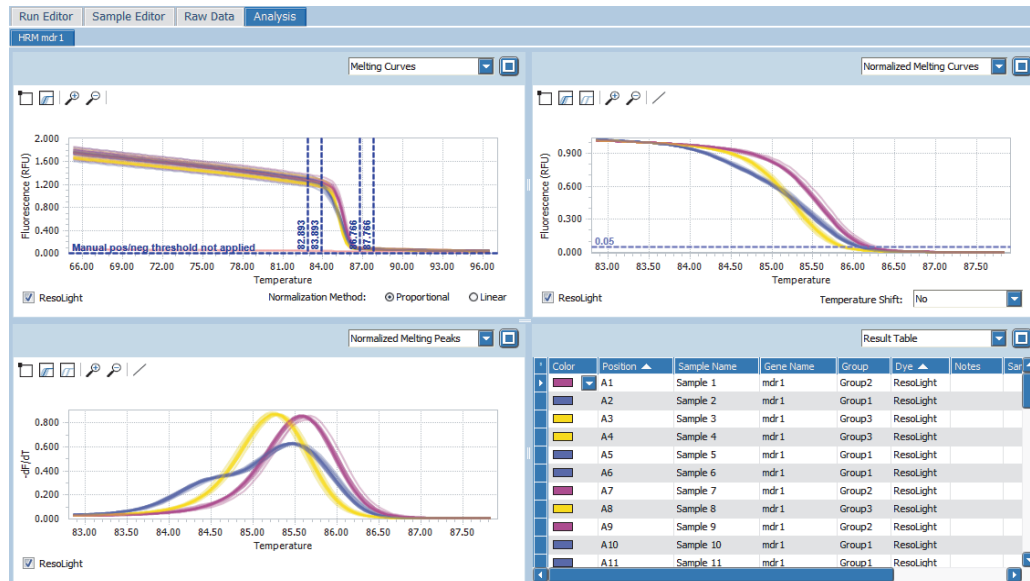

## To create the high resolution melting analysis for the *add1* gene

- 1 Create the high resolution melting analysis for the *add1* gene in the same way as described in section [To create the high resolution melting analysis for the \*mdr1\* gene](#), on page 155.

## 6.5.2 Analysis settings

### Optional: To specify the analysis settings

- 1 In the tool bar, choose the *Analysis Settings* icon.

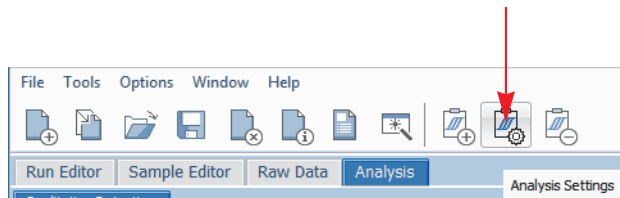

The *High Resolution Melting Settings* dialog box opens.

- 2 In the *High Resolution Melting Settings* dialog box, specify the analysis-specific settings, for example:
  - ▶ On the *Calculation* tab:
    - ▶ Under *Normalization Method*, choose whether normalization is to be performed proportional (default value) or linear.
    - ▶ Under *Fluorescence Normalization*, specify the values for the pre-melt range and the post-melt range.
    - ▶ Under *Sensitivity*, customize the *Delta Tm Discrimination* value and the *Curve Shape Discrimination* value for the algorithm. These settings overrule the existing groupings, but do not overrule the settings for *Pos/Neg Threshold*, normalization, and *Temperature Shift*.
  - ▶ For detailed information on these values, refer to the *LightCycler® 96 System Operator's Guide*, chapter B, section "High Resolution Melting".
  - ▶ In *Pos / Neg Threshold*, specify the threshold value for the fluorescence.
- ▶ The range and threshold settings in the 'High Resolution Melting Settings' dialog box correspond to the slider settings in the 'Melting Curves' view. For detailed information on these settings, see section [Melting curves](#), on page 159.
- ▶ Optional: Choose *Reset* to reset the algorithm parameters to their default values for recalculation.

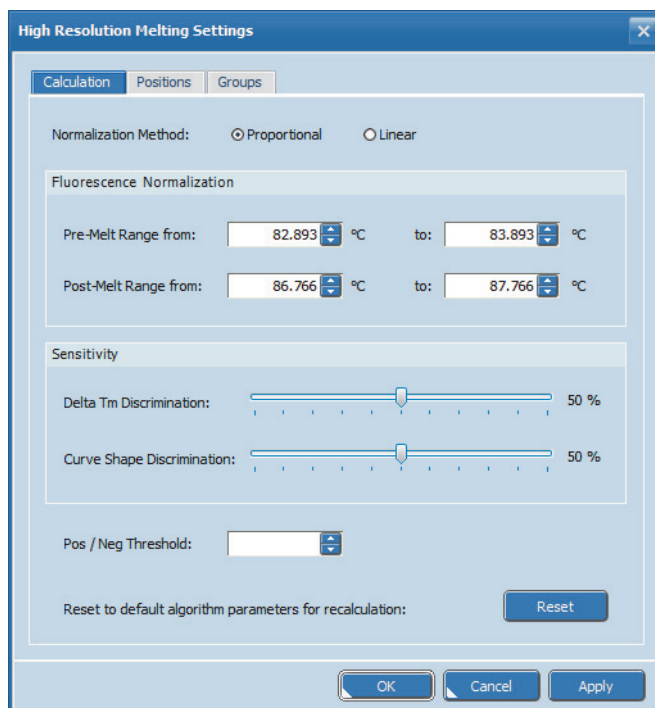

- ▶ On the *Positions* tab, remove samples from the analysis, if applicable.
- ▶ On the *Groups* tab, rename the defined groups that the automated algorithm has calculated.

### 6.5.3 Melting curves

On the *HRM* tab, melting curves show the raw fluorescence intensity against the temperature in °C. The chart shows the downward curve in fluorescence for the samples as they melt.

The algorithm provides default settings for the temperature ranges specifying the normalization areas. The sliders in the melting curves chart allow for changing the Pos/Neg threshold and the temperature ranges manually.

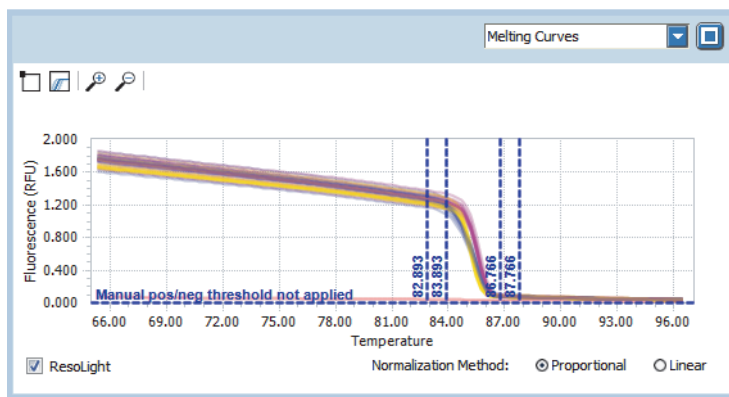

#### To change the pre-melting and post-melting range of the normalization area and the normalization method

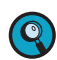

The slider settings in the 'Melting Curves' view correspond to the 'Pre-Melt Range' and 'Post-Melt Range' settings in the 'High Resolution Melting Settings' dialog box.

- 1 Use the vertical sliders to locate the temperature ranges where normalization is expected to be useful.
- 2 To specify the pre-melting range, drag the two leftmost, vertical sliders *Pre-Melting Range from* and *Pre-Melting Range to* manually to the appropriate locations, for example, to 82.890 and 83.890 respectively.

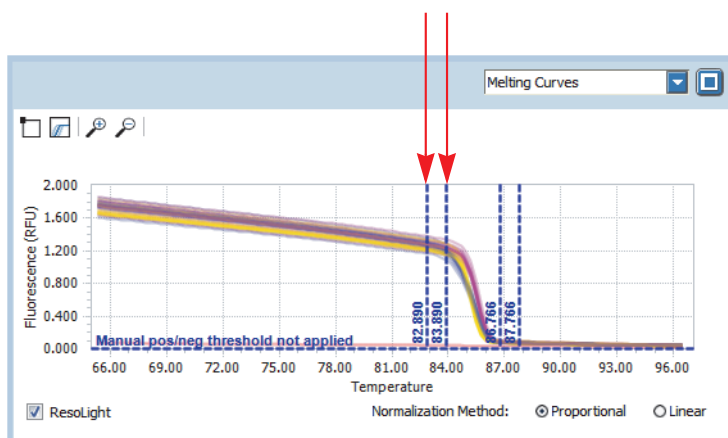

The *Normalized Melting Curves* chart, the *Normalized Melting Peaks* chart, and the *Difference Plot* are displayed according to the defined ranges.

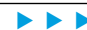

- 3 To specify the post-melting range, drag the two rightmost, vertical sliders *Post-Melting Range from* and *Post-Melting Range to* manually to the appropriate locations, for example, to 86.770 and 87.770 respectively.

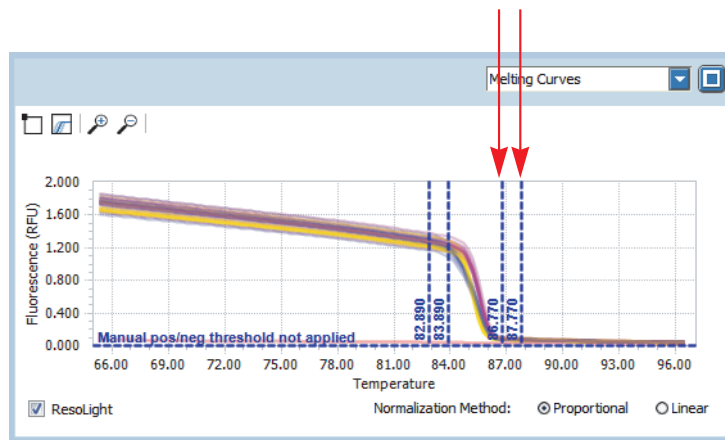

The *Normalized Melting Curves* chart, the *Normalized Melting Peaks* chart, and the *Difference Plot* are displayed according to the defined ranges.

- 4 Optional: To specify the *Normalization Method*, choose the corresponding option: *Proportional* or *Linear*.

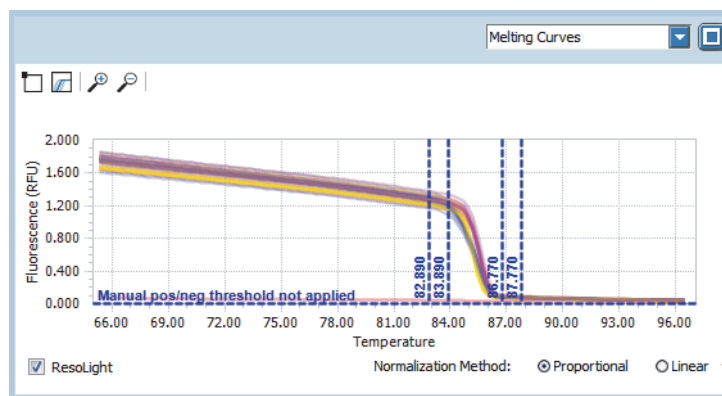

The *Normalized Melting Curves* chart, the *Normalized Melting Peaks* chart, and the *Difference Plot* are displayed according to the specified method.

## To change the Pos/Neg threshold of the normalization area

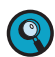

The slider settings in the 'Melting Curves' view correspond to the 'Pos / Neg Threshold' settings in the 'High Resolution Melting Settings' dialog box.

- 1 In the *Melting Curves* view, drag the horizontal slider manually up or down to the appropriate location.

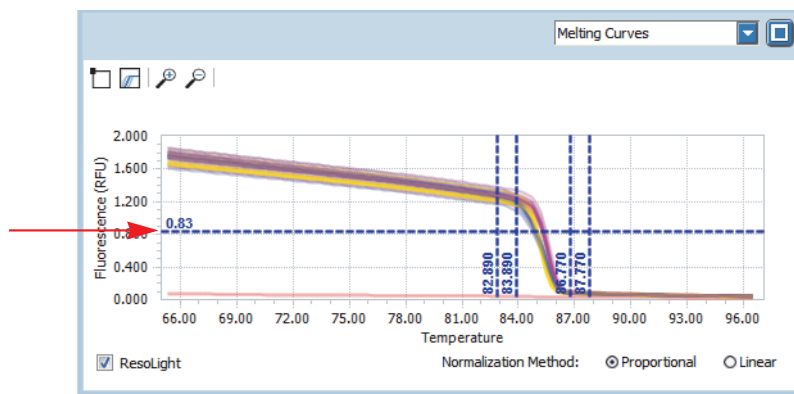

The *Normalized Melting Curves* chart, the *Normalized Melting Peaks* chart, and the *Difference Plot* are displayed according to the defined threshold.

### 6.5.4 Normalized melting curves

On the *HRM* tab, normalized melting curves are calculated by normalizing the raw melting curve data according to the values specified in the melting curves chart. The pre-melt and post-melt signals of all samples are set to uniform values. Pre-melt signals are uniformly set to a relative value of 100%, while post-melt signals are set to a relative value of 0%. Normalizing the initial and final fluorescence in all samples aids interpretation and analysis of the data.

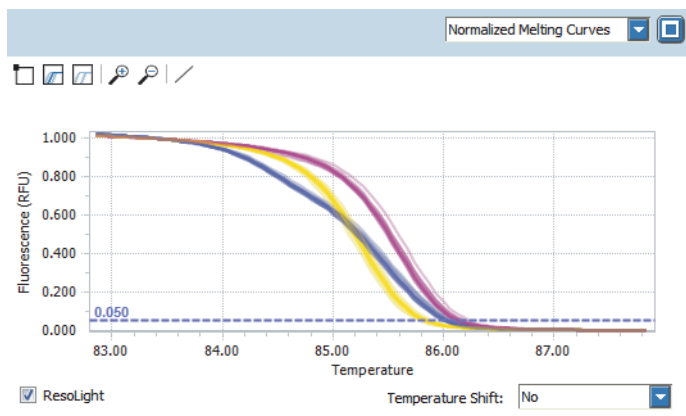

You can apply a temperature shift to all data. This shift only changes the display of the curves; it does not change algorithm parameters for group calculation. The temperature shift normalizes all melting curves to the specified intensity threshold.

**Optional: To apply a temperature shift to all data**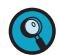

For experiments with suboptimal temperature performance, you can apply a temperature shift to all data. For data of reasonable quality, this step is not recommended, as it normally disables the separation of homozygous mutants and wild types. Only when poor data quality is observed will the temperature shift improve the separation of heterozygous mutants (with different curve shape) from the group of wild types and homozygous mutants. As the algorithm calculation is not influenced by the temperature shift, this function only supports visual discrimination of poor data for subsequent manual annotation.

- 1 From the *Temperature Shift* drop-down list, choose *Manual*.

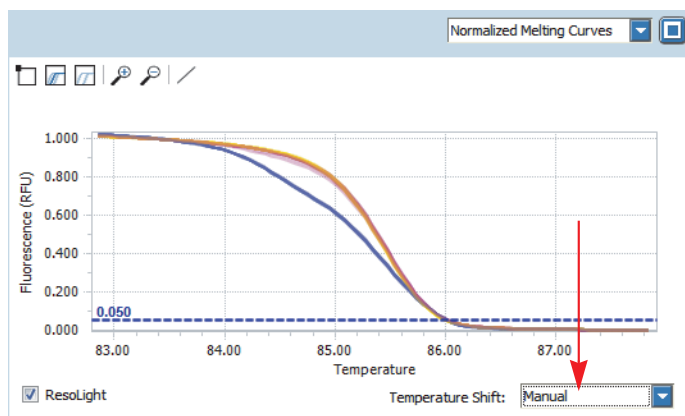

The *Temperature Shift* slider is displayed in dark blue.

- 2 Drag the *Manual Temperature Shift* slider to set the *Temperature Shift* manually.

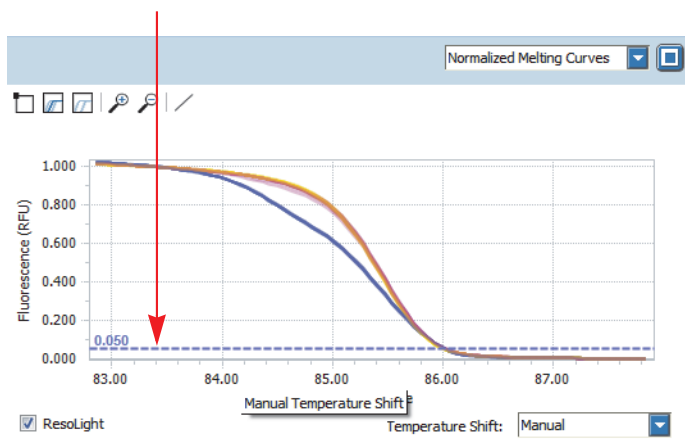

The *Normalized Melting Peaks* chart and the *Difference Plot* are displayed according to the applicable temperature shift.

**Optional: To assign a group by a line segment**

- 1 For information on how to assign a group by a line segment, see section [Optional: To assign a group by a line segment](#), on page 163

### 6.5.5 Normalized melting peaks

In the *Normalized Melting Peaks* view, the first negative derivatives of the normalized melting curves are displayed. In this chart, the melting temperature range of each sample appears as a peak. Displaying the melting temperature ranges as peaks enables improved discrimination of complex groupings.

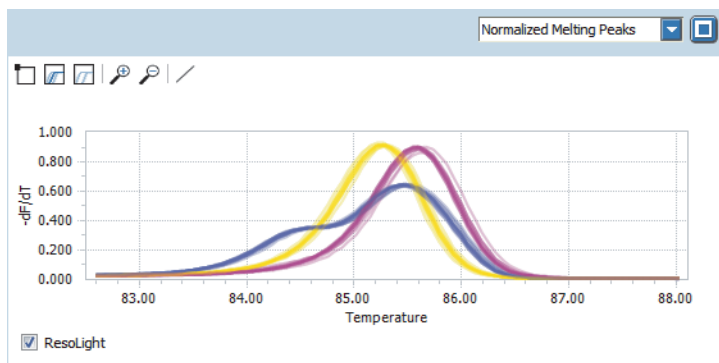

If you want to customize the default group calculation of the automated algorithm, you can overrule it by using the *Assign Group by Line Segment* tool, see section [Optional: To assign a group by a line segment](#), on page 163.

#### Optional: To assign a group by a line segment

- 1 Choose the *Assign Group by Line Segment* icon.  
The cursor changes to a cross.

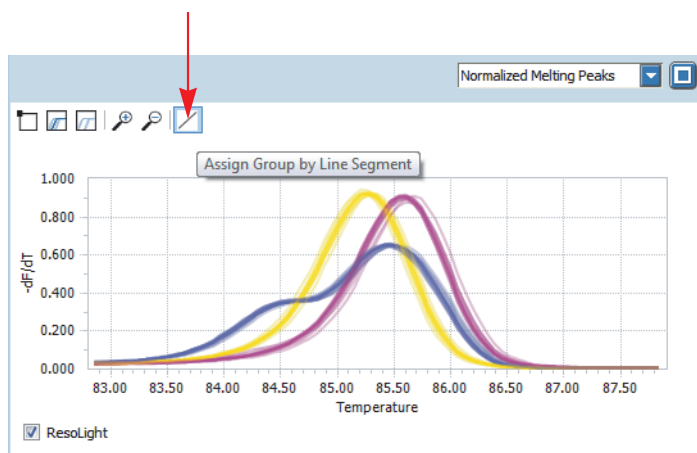

- 2 Select the samples that you want to assign to another group.
  - ▶ Click in the graph, for example the *Normalized Melting Peaks* graph.
  - ▶ Hold down the left mouse button and draw a line with the mouse to select one or more curves that you want to assign to another group.

When you release the mouse button, all curves which pass through the line will be selected and all other curves deselected. The *Group Assignment* dialog box opens.

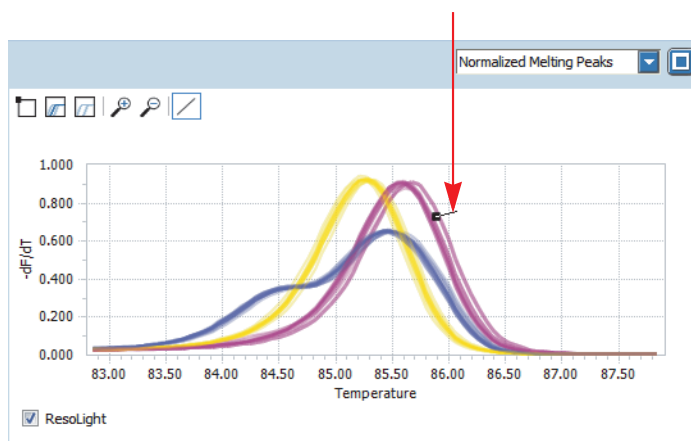

- 3 From the *Assign to Group:* drop-down list, choose the group the selected samples are to be assigned to.

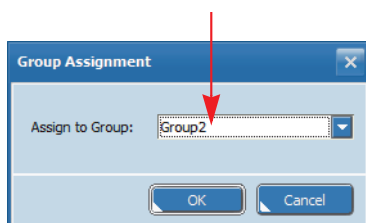

- 4 Choose *OK*.  
All charts on the *HRM* tab are displayed according to the new group assignment.

### 6.5.6 Result table

The result table displays the calculated results of the high resolution melting, for example, which group each sample belongs to. The sample colors in the result table are automatically assigned and updated according to the group calls.

| Result Table |       |            |             |           |        |           |       |
|--------------|-------|------------|-------------|-----------|--------|-----------|-------|
|              | Color | Position ▲ | Sample Name | Gene Name | Group  | Dye ▲     | Notes |
| ▶            |       | A1         | Sample 1    | mdr1      | Group2 | ResoLight |       |
|              |       | A2         | Sample 2    | mdr1      | Group1 | ResoLight |       |
|              |       | A3         | Sample 3    | mdr1      | Group3 | ResoLight |       |
|              |       | A4         | Sample 4    | mdr1      | Group3 | ResoLight |       |
|              |       | A5         | Sample 5    | mdr1      | Group1 | ResoLight |       |
|              |       | A6         | Sample 6    | mdr1      | Group1 | ResoLight |       |
|              |       | A7         | Sample 7    | mdr1      | Group2 | ResoLight |       |
|              |       | A8         | Sample 8    | mdr1      | Group3 | ResoLight |       |
|              |       | A9         | Sample 9    | mdr1      | Group2 | ResoLight |       |
|              |       | A10        | Sample 10   | mdr1      | Group1 | ResoLight |       |
|              |       | A11        | Sample 11   | mdr1      | Group1 | ResoLight |       |

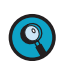

For detailed information on all calculated results displayed in the 'Result Table' view, refer to the *LightCycler® 96 System Operator's Guide*, chapter B, section "High resolution melting".

### 6.5.7 Difference plot

In the *Difference Plot* view, each curve is displayed as it appears when subtracting the baseline curve, after normalization and, optionally, temperature shift. The difference plot helps cluster samples into groups that have similar melting curves (for example, those with the same genotype). The appearance of the curves in this chart depends on the baseline selected as the reference. When more than one baseline is selected, the curves of all selected baseline wells are averaged, and this average curve is used as the reference curve to be subtracted. By default, the average curve of the group with the most members is used as the default baseline.

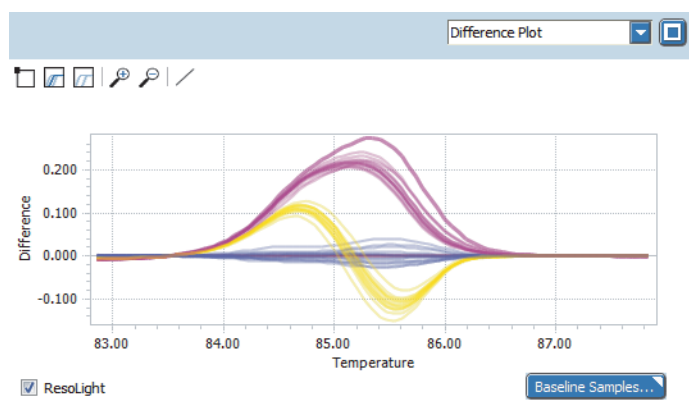

#### Optional: To select another baseline as the reference, for example, another group

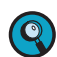

As baseline sample(s), you can select one or more samples, using the [Shift] key and the [Ctrl] key on your keyboard, or all samples of one of the calculated groups. If you select more than one baseline sample, the curves of all selected baseline samples are averaged, and this average curve is used as the reference curve.

1

In the *Difference Plot* view, choose *Baseline Samples*.

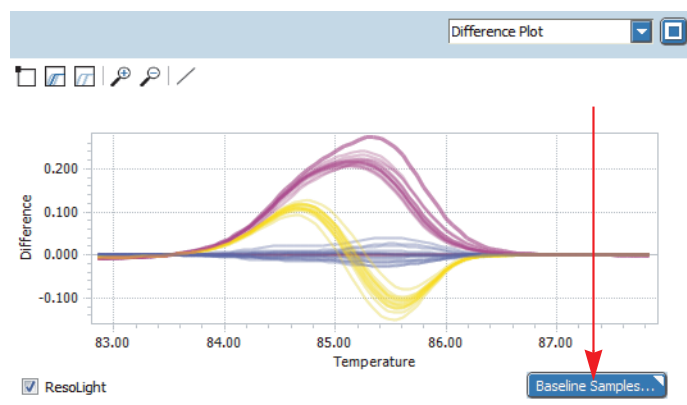

The *Baseline Samples* dialog box opens.

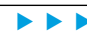

- 2 Clear the *Group1* check box.

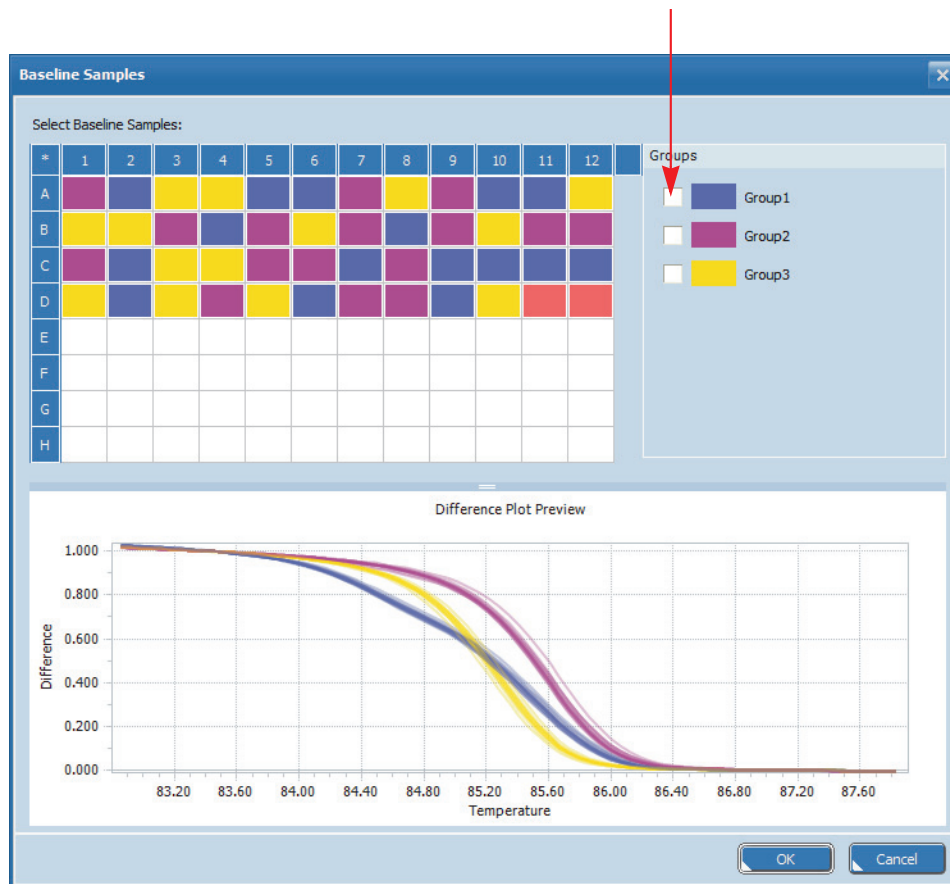

The *Difference Plot Preview* is updated.

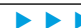

- 3 For example, select the samples of another group as the baseline samples.

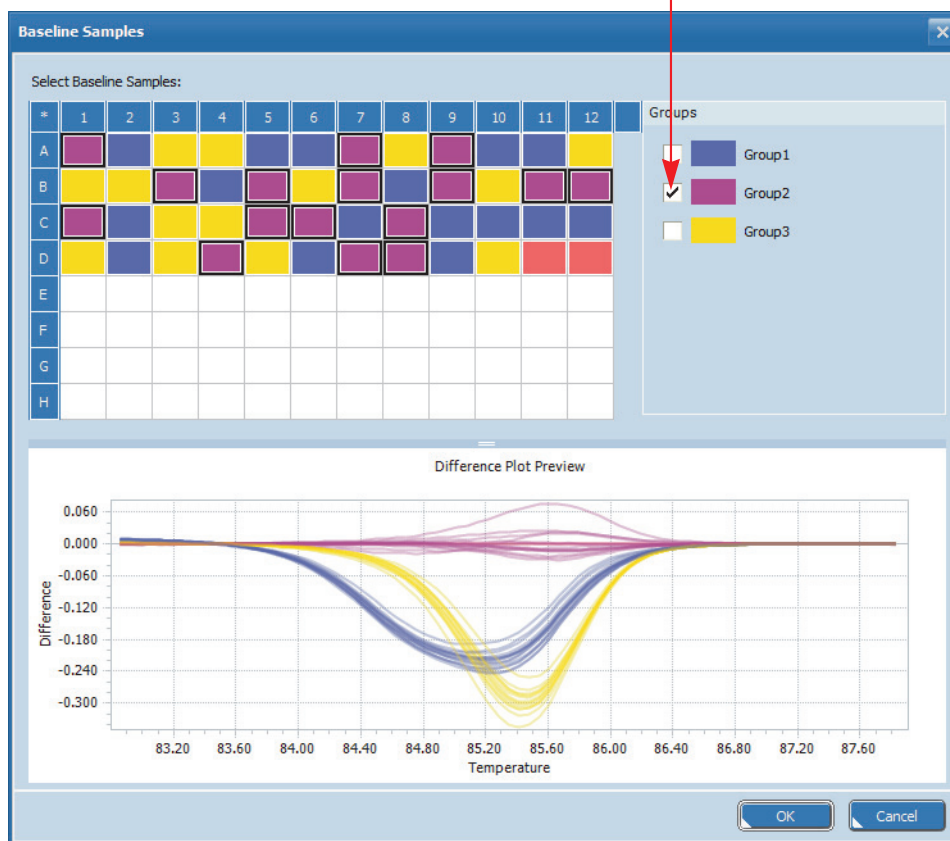

The *Difference Plot Preview* is updated again.

- 4 Choose *OK*.  
The chart in the *Difference Plot* view is updated accordingly.

### Optional: To assign a group by a line segment

- 1 For information on how to assign a group by a line segment, see section [Optional: To assign a group by a line segment](#), on page 163.

### 6.5.8 Heat map

The heat map shows an image of the multiwell plate used in the experiment for the specified channel (ResoLight dye). For each well, the calculated group type is displayed. As the high resolution melting analysis is gene-specific, only the samples the relevant gene is assigned to are displayed.

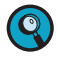

A heat map only displays the samples contained in the sample list. Samples not in the list (that is, cleared wells and removed samples) are displayed in white.

To display the sample name and the gene name for each sample, you can enlarge the heat map to fill the entire working area using the  button.

The image below shows the heat map for the samples the *mdr1* gene is assigned to.

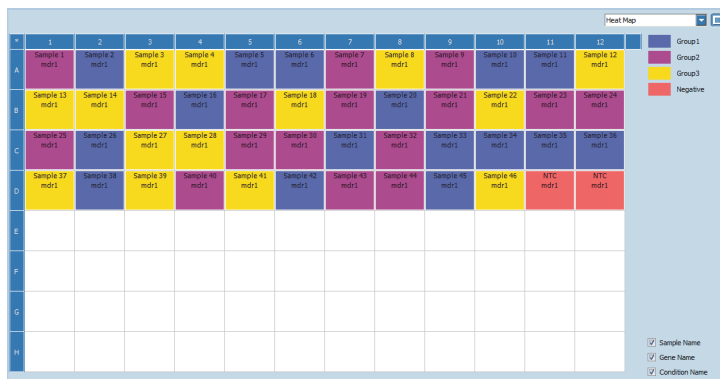

## 6.6 Exporting result data

You can export the following result data to Microsoft Word or Excel:

- ▶ The result table as a text file.
- ▶ The result graphs as a PNG file, GIF file, or text file.

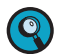

For detailed information on how to export result data, refer to the *LightCycler® 96 System Operator's Guide*, chapter B, section "Exporting analysis results".

# Shutting down the system

You shut down the system as follows:

- ▶ Exit the LightCycler® 96 Application Software, see section *To exit the LightCycler® 96 Application Software*, below.
- ▶ Exit the LightCycler® 96 Instrument Software and switch off the instrument, see section *To exit the LightCycler® 96 Instrument Software and switch off the instrument*, on page 170.

## To exit the LightCycler® 96 Application Software

- 1 Ensure that all necessary data is saved.  
In the tool bar, choose the *Save Experiment* icon.

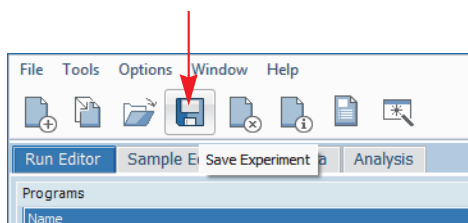

- 2 In the tool bar, choose the *Close Experiment* icon to close any opened experiments.

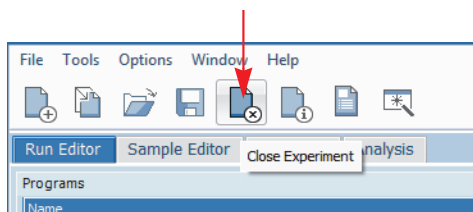

- 3 In the title bar of the main window, choose the  (Close) button to exit the software.

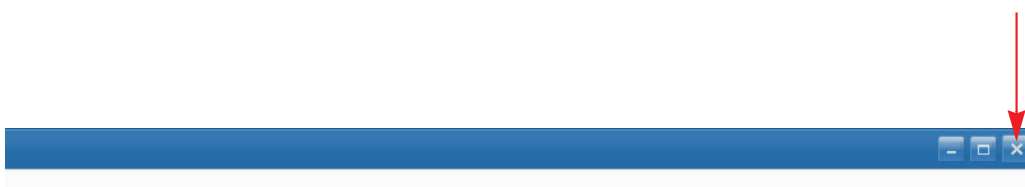

## To exit the LightCycler® 96 Instrument Software and switch off the instrument

- 1 In the global action bar of the LightCycler® 96 Instrument Software main window, choose *Exit*.

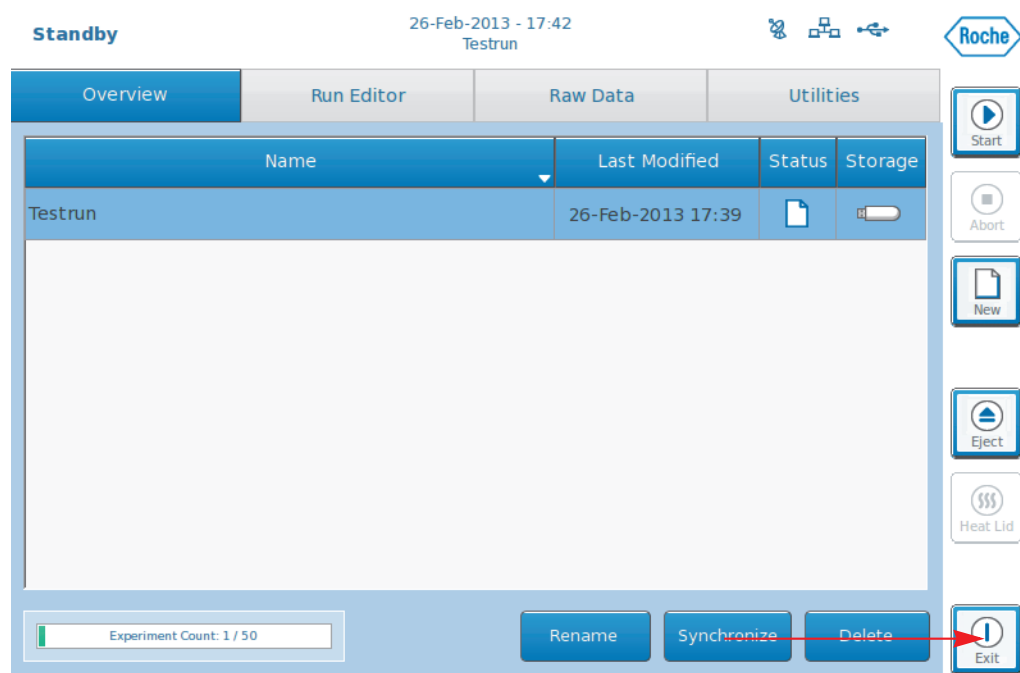

The *Exit Options* window area opens.

- 2 Choose *Shut down*.

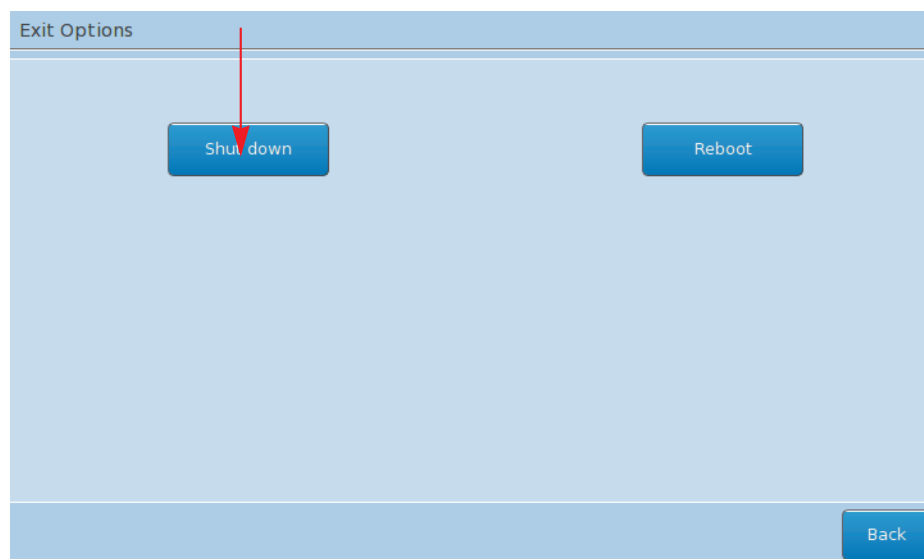

The instrument software completes all currently running actions and shuts down.

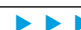

- 
- 3 Use the mains power switch on the back of the instrument to switch off the instrument.
- ⚠ *Do not switch off the instrument before shutting down the software, otherwise data could be lost.*

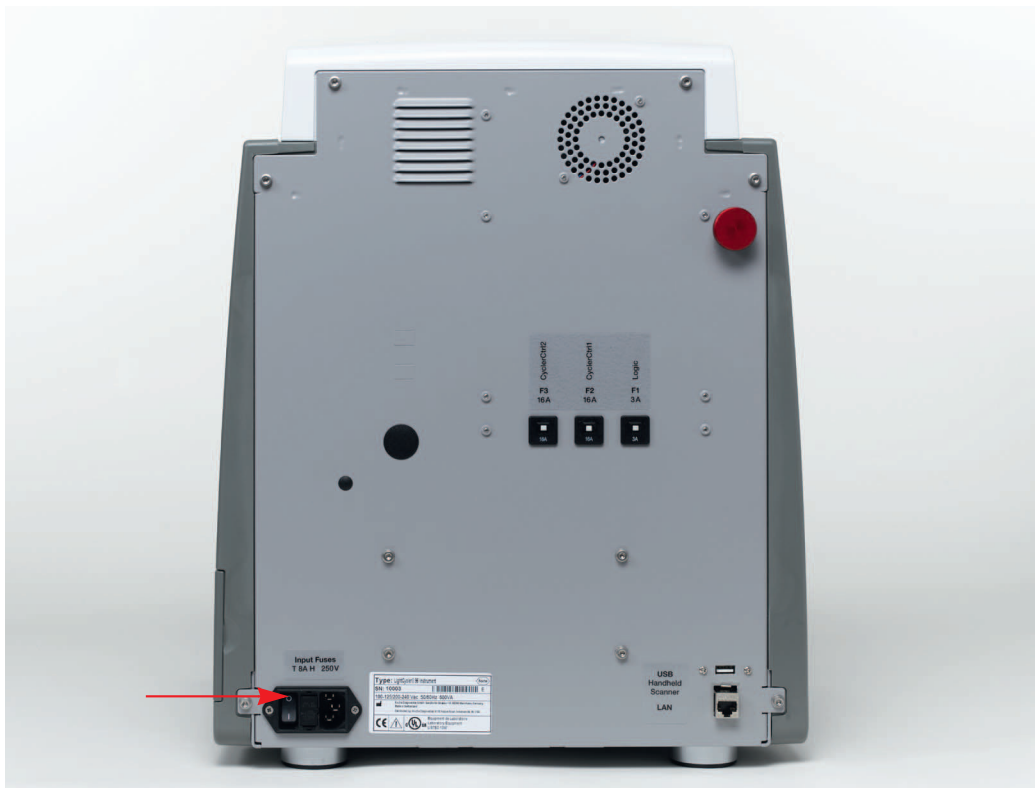

D

*D*

# Appendix

## 1 Index

### Symbols

|             |    |
|-------------|----|
| .lc96p..... | 42 |
| .lc96u..... | 42 |
| .rdml ..... | 42 |

### A

|                                     |     |
|-------------------------------------|-----|
| Abs Quant Settings dialog box ..... | 70  |
| Absolute quantification .....       | 58  |
| amplification curves .....          | 71  |
| analysis settings .....             | 70  |
| concentration .....                 | 65  |
| controls .....                      | 58  |
| Cq bars .....                       | 77  |
| creating analysis .....             | 68  |
| detection format .....              | 61  |
| editing sample data .....           | 62  |
| empty wells .....                   | 62  |
| gene assignment .....               | 65  |
| heat map .....                      | 73  |
| PCR mix .....                       | 59  |
| pipetting scheme .....              | 59  |
| reaction volume .....               | 61  |
| replicate groups .....              | 67  |
| result table .....                  | 73  |
| sample color .....                  | 74  |
| sample dilution .....               | 58  |
| sample names .....                  | 63  |
| sample types .....                  | 64  |
| standard curves .....               | 72  |
| temperature profile .....           | 60  |
| Add New Program dialog box .....    | 35  |
| All Data tab .....                  |     |
| relative quantification .....       | 118 |
| Amplification curves .....          |     |
| absolute quantification .....       | 71  |
| endpoint genotyping .....           | 89  |
| qualitative detection .....         | 131 |
| relative quantification .....       | 113 |
| Tm calling .....                    | 144 |
| Analysis settings .....             |     |
| absolute quantification .....       | 70  |
| endpoint genotyping .....           | 88  |
| high resolution melting .....       | 158 |
| qualitative detection .....         | 130 |
| relative quantification .....       | 111 |
| Tm calling .....                    | 143 |
| Assign group by line segment .....  |     |
| high resolution melting .....       | 163 |
| Assigning gene to dye .....         | 55  |

### B

|                        |     |
|------------------------|-----|
| Baseline samples ..... |     |
| difference plot .....  | 165 |

### C

|                                        |                            |
|----------------------------------------|----------------------------|
| Centrifugation .....                   | 59, 79, 101, 121, 135, 149 |
| Clearing wells .....                   | 51                         |
| Combined call heat map .....           |                            |
| qualitative detection .....            | 132                        |
| Concentration .....                    |                            |
| absolute quantification .....          | 65                         |
| Conditions .....                       |                            |
| relative quantification .....          | 107                        |
| Controls .....                         |                            |
| absolute quantification .....          | 58                         |
| endpoint genotyping .....              | 78                         |
| high resolution melting .....          | 147                        |
| qualitative detection .....            | 120                        |
| relative quantification .....          | 99                         |
| Tm calling .....                       | 134                        |
| Cq .....                               | 9                          |
| Cq bars .....                          |                            |
| relative quantification .....          | 118                        |
| Cq Bars chart .....                    | 77                         |
| Creating .....                         |                            |
| absolute quantification analysis ..... | 68                         |
| endpoint genotyping analysis .....     | 86                         |
| experiment, application software ..... | 21                         |
| experiment, instrument software .....  | 32                         |
| high resolution melting analysis ..... | 155                        |
| qualitative detection analysis .....   | 128                        |
| relative quantification analysis ..... | 109                        |
| Tm calling analysis .....              | 141                        |
| Cy5 .....                              | 9                          |

### D

|                                                |     |
|------------------------------------------------|-----|
| Data Visualization dialog box .....            | 114 |
| Detection format .....                         |     |
| absolute quantification .....                  | 61  |
| application software .....                     | 27  |
| endpoint genotyping .....                      | 81  |
| high resolution melting .....                  | 151 |
| instrument software .....                      | 40  |
| qualitative detection .....                    | 123 |
| relative quantification .....                  | 103 |
| Tm calling .....                               | 137 |
| Detection Format dialog box .....              |     |
| application software .....                     | 27  |
| Detection Format window area .....             |     |
| instrument software .....                      | 40  |
| Difference plot .....                          |     |
| high resolution melting .....                  | 165 |
| specifying baseline samples as reference ..... | 165 |
| dsDNA .....                                    | 9   |

**E**

|                                              |        |
|----------------------------------------------|--------|
| E .....                                      | 9      |
| Editing sample names.....                    | 53     |
| Editing sample types.....                    | 53     |
| Endpoint genotyping.....                     | 78     |
| amplification curves .....                   | 89     |
| analysis settings .....                      | 88     |
| controls .....                               | 78     |
| creating analysis .....                      | 86     |
| detection format.....                        | 81     |
| editing sample data .....                    | 82     |
| empty wells.....                             | 82     |
| filtering results .....                      | 95     |
| gene assignment .....                        | 85     |
| heat map .....                               | 93     |
| PCR mix.....                                 | 79     |
| pipetting scheme .....                       | 79     |
| reaction volume .....                        | 81     |
| renaming genotypes .....                     | 94     |
| result table.....                            | 93     |
| sample dilution .....                        | 78     |
| sample names .....                           | 83     |
| sample types .....                           | 84     |
| scatter plot.....                            | 91     |
| temperature profile .....                    | 80     |
| EPF.....                                     | 9      |
| Error bars .....                             | 115    |
| Experiment .....                             |        |
| .rdml files .....                            | 42     |
| absolute quantification.....                 | 58     |
| assigning gene to dye.....                   | 55     |
| clearing wells.....                          | 51     |
| creating, application software.....          | 21     |
| creating, instrument software.....           | 32     |
| detection format, application software...    | 27     |
| detection format, instrument software...     | 40     |
| editing sample names.....                    | 53     |
| editing sample types .....                   | 53     |
| endpoint genotyping.....                     | 78     |
| file types .....                             | 42     |
| LightCycler® 96 files.....                   | 42     |
| monitoring.....                              | 45     |
| reaction volume, application software...     | 27     |
| reaction volume, instrument software...      | 42     |
| run finished.....                            | 46     |
| sample list .....                            | 50     |
| sample names .....                           | 54     |
| sample types .....                           | 54     |
| saving, application software .....           | 29, 56 |
| saving, instrument software .....            | 42     |
| starting .....                               | 43     |
| synchronizing.....                           | 48     |
| temperature profile, application software... | 23     |
| temperature profile, instrument software ... | 35     |
| T <sub>m</sub> calling .....                 | 134    |
| transferring to application software .....   | 47     |
| transferring to the instrument.....          | 30     |

**F**

|                   |    |
|-------------------|----|
| FAM .....         | 9  |
| File suffix ..... |    |
| .lc96p.....       | 42 |
| .lc96u.....       | 42 |
| .rdml .....       | 42 |

**G**

|                               |     |
|-------------------------------|-----|
| Gene assignment .....         |     |
| absolute quantification.....  | 65  |
| endpoint genotyping .....     | 85  |
| high resolution melting.....  | 154 |
| qualitative detection .....   | 127 |
| relative quantification ..... | 107 |
| T <sub>m</sub> calling .....  | 140 |
| Genotypes.....                | 91  |
| renaming.....                 | 94  |
| GOI .....                     | 9   |

**H**

|                                   |     |
|-----------------------------------|-----|
| Heat map .....                    |     |
| absolute quantification.....      | 73  |
| endpoint genotyping .....         | 93  |
| high resolution melting.....      | 168 |
| qualitative detection .....       | 131 |
| relative quantification .....     | 117 |
| T <sub>m</sub> calling .....      | 146 |
| HEX .....                         | 9   |
| High resolution melting .....     | 147 |
| analysis settings .....           | 158 |
| assign group by line segment..... | 163 |
| controls .....                    | 147 |
| creating analysis .....           | 155 |
| detection format.....             | 151 |
| difference plot .....             | 165 |
| editing sample data .....         | 152 |
| gene assignment .....             | 154 |
| heat map .....                    | 168 |
| melting curves.....               | 159 |
| normalized melting curves.....    | 161 |
| normalized melting peaks .....    | 163 |
| PCR mix.....                      | 148 |
| pipetting scheme .....            | 148 |
| reaction volume .....             | 151 |
| replicate groups.....             | 154 |
| result table.....                 | 164 |
| sample dilution .....             | 147 |
| sample names .....                | 152 |
| sample types .....                | 153 |
| temperature profile .....         | 150 |
| HRM .....                         | 9   |

E

**L**

|                                      |     |
|--------------------------------------|-----|
| LightCycler® 96 Application Software |     |
| shutting down .....                  | 169 |
| starting .....                       | 17  |
| LightCycler® 96 Instrument           |     |
| shutting down .....                  | 170 |
| starting .....                       | 17  |
| symbols .....                        | 11  |
| LightCycler® 96 Instrument Software  |     |
| shutting down .....                  | 170 |

**M**

|                                                                |     |
|----------------------------------------------------------------|-----|
| Melting Analysis Parameters dialog box .....                   | 143 |
| Melting curves                                                 |     |
| changing the Pos/Neg Threshold of the normalization area ..... | 161 |
| changing the post-melting range .....                          | 159 |
| changing the pre-melting range .....                           | 159 |
| high resolution melting .....                                  | 159 |
| T <sub>m</sub> calling .....                                   | 144 |
| Melting peak areas                                             |     |
| T <sub>m</sub> calling .....                                   | 145 |
| Melting peaks                                                  |     |
| T <sub>m</sub> calling .....                                   | 145 |
| Monitoring experiment run .....                                | 45  |

**N**

|                                    |     |
|------------------------------------|-----|
| Normalized melting curves          |     |
| applying a temperature shift ..... | 162 |
| high resolution melting .....      | 161 |
| Normalized melting peaks           |     |
| high resolution melting .....      | 163 |
| NRC .....                          | 9   |
| NTC .....                          | 9   |

**P**

|                                             |         |
|---------------------------------------------|---------|
| PCR .....                                   | 9       |
| PCR mix                                     |         |
| absolute quantification .....               | 59      |
| endpoint genotyping .....                   | 79      |
| high resolution melting .....               | 148     |
| qualitative detection .....                 | 121     |
| relative quantification .....               | 99, 100 |
| T <sub>m</sub> calling .....                | 135     |
| PE .....                                    | 9       |
| Pipetting scheme                            |         |
| absolute quantification .....               | 59      |
| endpoint genotyping .....                   | 79      |
| high resolution melting .....               | 148     |
| qualitative detection .....                 | 121     |
| relative quantification .....               | 100     |
| T <sub>m</sub> calling .....                | 135     |
| Plate View tab .....                        | 53      |
| Pos/Neg Threshold of the normalization area |         |
| melting curves .....                        | 161     |
| Post-melting range                          |         |
| melting curves .....                        | 159     |
| Preconditions .....                         | 57      |

|                                      |     |
|--------------------------------------|-----|
| Predefined Programs dialog box ..... | 23  |
| Pre-melting range                    |     |
| melting curves .....                 | 159 |
| Program                              |     |
| adding, application software .....   | 23  |
| adding, instrument software .....    | 35  |
| Program Settings window area .....   | 36  |

**Q**

|                                                 |     |
|-------------------------------------------------|-----|
| qPCR .....                                      | 9   |
| Qualitative detection .....                     | 120 |
| amplification curves .....                      | 131 |
| analysis settings .....                         | 130 |
| combined call heat map .....                    | 132 |
| controls .....                                  | 120 |
| creating analysis .....                         | 128 |
| detection format .....                          | 123 |
| editing sample data .....                       | 124 |
| empty wells .....                               | 124 |
| gene assignment .....                           | 127 |
| heat map .....                                  | 131 |
| PCR mix .....                                   | 121 |
| pipetting scheme .....                          | 121 |
| reaction volume .....                           | 123 |
| replicate groups .....                          | 127 |
| result table .....                              | 133 |
| sample dilution .....                           | 120 |
| sample names .....                              | 125 |
| sample types .....                              | 126 |
| temperature profile .....                       | 122 |
| Qualitative Detection Settings dialog box ..... | 130 |

**R**

|                               |     |
|-------------------------------|-----|
| Ratio bars .....              | 113 |
| data visualization .....      | 114 |
| RDML .....                    | 9   |
| Reaction volume               |     |
| absolute quantification ..... | 61  |
| application software .....    | 27  |
| endpoint genotyping .....     | 81  |
| high resolution melting ..... | 151 |
| instrument software .....     | 42  |
| qualitative detection .....   | 123 |
| relative quantification ..... | 103 |
| T <sub>m</sub> calling .....  | 137 |
| Reference gene                |     |
| relative quantification ..... | 111 |

|                                           |        |
|-------------------------------------------|--------|
| Relative quantification                   |        |
| All Data tab .....                        | 118    |
| amplification curves .....                | 113    |
| analysis settings .....                   | 111    |
| conditions .....                          | 107    |
| controls .....                            | 99     |
| Cq bars .....                             | 118    |
| creating analysis .....                   | 109    |
| detection format .....                    | 103    |
| editing sample data .....                 | 104    |
| empty wells .....                         | 104    |
| error bars .....                          | 115    |
| gene assignment .....                     | 107    |
| heat map .....                            | 117    |
| PCR mix, reference gene .....             | 100    |
| PCR mix, target gene .....                | 99     |
| pipetting scheme .....                    | 100    |
| ratio bars .....                          | 113    |
| reaction volume .....                     | 103    |
| reference gene .....                      | 111    |
| result table .....                        | 118    |
| sample dilution .....                     | 99     |
| sample names .....                        | 105    |
| sample types .....                        | 106    |
| Statistic Data tab .....                  | 118    |
| study calibrator .....                    | 112    |
| temperature profile .....                 | 102    |
| Replicate groups                          |        |
| absolute quantification .....             | 67     |
| high resolution melting .....             | 154    |
| qualitative detection .....               | 127    |
| Result table                              |        |
| absolute quantification .....             | 73     |
| endpoint genotyping .....                 | 93     |
| filtering .....                           | 95     |
| high resolution melting .....             | 164    |
| qualitative detection .....               | 133    |
| relative quantification .....             | 118    |
| Tm calling .....                          | 146    |
| Run                                       |        |
| finished .....                            | 46     |
| monitoring .....                          | 45     |
| preconditions .....                       | 57     |
| starting .....                            | 43     |
| Run Editor tab                            |        |
| application software .....                | 23     |
| instrument software .....                 | 35     |
| <b>S</b>                                  |        |
| Sample color                              |        |
| absolute quantification .....             | 74     |
| endpoint genotyping .....                 | 96     |
| Sample data                               |        |
| absolute quantification .....             | 62     |
| endpoint genotyping .....                 | 82     |
| high resolution melting .....             | 152    |
| qualitative detection .....               | 124    |
| relative quantification .....             | 104    |
| Tm calling .....                          | 138    |
| Sample dilution                           |        |
| absolute quantification .....             | 58     |
| endpoint genotyping .....                 | 78     |
| high resolution melting .....             | 147    |
| qualitative detection .....               | 120    |
| relative quantification .....             | 99     |
| Sample Editor tab .....                   | 53     |
| Sample list .....                         | 50     |
| clearing wells .....                      | 51     |
| Plate View tab .....                      | 53     |
| Sample Editor tab .....                   | 53     |
| Sample names .....                        | 54     |
| absolute quantification .....             | 63     |
| endpoint genotyping .....                 | 83     |
| high resolution melting .....             | 152    |
| qualitative detection .....               | 125    |
| relative quantification .....             | 105    |
| Tm calling .....                          | 139    |
| Sample types .....                        | 54     |
| absolute quantification .....             | 64     |
| endpoint genotyping .....                 | 84     |
| high resolution melting .....             | 153    |
| qualitative detection .....               | 126    |
| relative quantification .....             | 106    |
| Tm calling .....                          | 139    |
| Saving                                    |        |
| experiment to USB drive .....             | 47     |
| experiment, application software .....    | 29, 56 |
| experiment, instrument software .....     | 42     |
| Scaling                                   |        |
| y axis .....                              | 71     |
| Scatter plot .....                        | 91     |
| angles .....                              | 91     |
| genotype groups .....                     | 91     |
| selecting cycle as basis for fluorescence |        |
| value display .....                       | 93     |
| slider settings .....                     | 91     |
| thresholds .....                          | 91     |
| Shutting down                             |        |
| LightCycler® 96 Application Software ..   | 169    |
| LightCycler® 96 Instrument .....          | 170    |
| LightCycler® 96 Instrument Software ..    | 170    |
| SNP .....                                 | 9      |
| Standard curve                            |        |
| absolute quantification .....             | 72     |
| Starting                                  |        |
| experiment run .....                      | 43     |
| LightCycler® 96 Application Software ..   | 17     |
| LightCycler® 96 Instrument .....          | 17     |
| Statistic Data tab                        |        |
| relative quantification .....             | 118    |
| Step                                      |        |
| Acquisition Mode, application software .. | 26     |
| Acquisition Mode, instrument software ..  | 39     |
| adding, application software .....        | 25     |
| adding, instrument software .....         | 37     |
| Temperature, application software .....   | 25     |
| Temperature, instrument software .....    | 38     |
| Study calibrator .....                    | 112    |

E

|                     |    |
|---------------------|----|
| SYBR .....          | 9  |
| Sync Selected ..... | 48 |

## T

|                                         |          |
|-----------------------------------------|----------|
| Temperature profile                     |          |
| absolute quantification.....            | 60       |
| creating, application software .....    | 23       |
| creating, instrument software .....     | 35       |
| endpoint genotyping.....                | 80       |
| high resolution melting.....            | 150      |
| qualitative detection.....              | 122      |
| relative quantification .....           | 102      |
| T <sub>m</sub> calling .....            | 136      |
| Temperature shift                       |          |
| normalized melting curves.....          | 162      |
| T <sub>m</sub> .....                    | 9        |
| T <sub>m</sub> calling .....            | 134      |
| amplification curves.....               | 144      |
| analysis settings .....                 | 143      |
| controls .....                          | 134, 135 |
| creating analysis .....                 | 141      |
| detection format .....                  | 137      |
| editing sample data .....               | 138      |
| empty wells .....                       | 138      |
| gene assignment .....                   | 140      |
| heat map .....                          | 146      |
| melting curves.....                     | 144      |
| melting peaks .....                     | 145      |
| PCR mix.....                            | 135      |
| reaction volume .....                   | 137      |
| result table.....                       | 146      |
| sample names.....                       | 139      |
| sample types.....                       | 139      |
| temperature profile .....               | 136      |
| Transferring                            |          |
| experiment to application software..... | 47       |
| experiment to the instrument .....      | 30       |

## U

|                         |    |
|-------------------------|----|
| USB .....               | 9  |
| USB drive               |    |
| saving experiment ..... | 47 |
| synchronizing.....      | 48 |

## V

|          |   |
|----------|---|
| VIC..... | 9 |
|----------|---|

## Y

|                      |    |
|----------------------|----|
| Y axis scaling ..... | 71 |
|----------------------|----|



**Published by**

Roche Diagnostics GmbH  
Sandhofer Straße 116  
68305 Mannheim  
Germany

© 2012 Roche Diagnostics.  
All rights reserved.

[www.roche-applied-science.com](http://www.roche-applied-science.com)

② 0513

**LightCycler®**

# **LightCycler® 96 System Operator's Guide, Version 2.0**

**Software Version 1.1**

**May 2013**



**For life science research only.  
Not for use in diagnostic procedures.**



|             |                                                              |           |
|-------------|--------------------------------------------------------------|-----------|
|             | <b>Prologue</b>                                              | <b>9</b>  |
| <b>I</b>    | <b>Revision history</b>                                      | 9         |
| <b>II</b>   | <b>Contact addresses</b>                                     | 9         |
| <b>III</b>  | <b>Declaration of conformity</b>                             | 10        |
| <b>IV</b>   | <b>Warranty</b>                                              | 10        |
| <b>V</b>    | <b>Trademarks</b>                                            | 10        |
| <b>VI</b>   | <b>Intended use</b>                                          | 10        |
| <b>VII</b>  | <b>License statements for the LightCycler® 96 Instrument</b> | 10        |
| <b>VIII</b> | <b>Software License Agreement</b>                            | 11        |
| 1           | PROGRAM LICENSE AGREEMENT                                    | 11        |
| 2           | GRANT OF SOFTWARE LICENSE                                    | 11        |
| 3           | LIMITED WARRANTY                                             | 11        |
| 4           | DISCLAIMER OF WARRANTIES                                     | 12        |
| 5           | LIMITATIONS OF REMEDIES                                      | 12        |
| 6           | GENERAL INFORMATION                                          | 12        |
| 7           | INTELLECTUAL PROPERTY RIGHTS                                 | 13        |
| 8           | DURATION AND TERMINATION                                     | 13        |
| 9           | IMPORT, EXPORT AND USE OF THE SOFTWARE                       | 13        |
| 10          | MISCELLANEOUS                                                | 13        |
| 11          | GOVERNING LAW AND PLACE OF JURISDICTION                      | 13        |
| <b>IX</b>   | <b>Open Source licenses</b>                                  | 14        |
| <b>X</b>    | <b>Preamble</b>                                              | 14        |
| <b>XI</b>   | <b>Contents of this operator's guide</b>                     | 14        |
| <b>XII</b>  | <b>Conventions used in this guide</b>                        | 15        |
| <b>XIII</b> | <b>Warnings and precautions</b>                              | 18        |
| <b>XIV</b>  | <b>Disposal of the instrument</b>                            | 20        |
| <b>A</b>    | <b>System description</b>                                    | <b>21</b> |
| <b>1</b>    | <b>Introduction</b>                                          | 24        |
| <b>2</b>    | <b>Specifications of the LightCycler® 96 Instrument</b>      | 25        |
| 2.1         | General specifications                                       | 25        |
| 2.1.1       | Environmental parameters                                     | 25        |
| 2.1.2       | Interfaces                                                   | 26        |
| 2.2         | Technical specifications                                     | 26        |
| 2.3         | Specifications of the detection unit                         | 26        |
| 2.3.1       | Excitation                                                   | 26        |
| 2.3.2       | Detection                                                    | 26        |
| 2.4         | Filter set                                                   | 26        |
| 2.5         | Specifications of the thermal block cycler                   | 27        |
| 2.6         | Specifications of the external handheld barcode scanner      | 27        |
| <b>3</b>    | <b>The LightCycler® 96 System Package</b>                    | 28        |
| <b>4</b>    | <b>System description</b>                                    | 29        |
| 4.1         | The LightCycler® 96 Instrument                               | 29        |
| 4.1.1       | Loading module                                               | 30        |
| 4.1.2       | Touchscreen                                                  | 30        |
| 4.1.3       | USB interfaces                                               | 30        |
| 4.1.4       | Instrument back                                              | 31        |
| 4.1.5       | Ventilation                                                  | 32        |

|          |                                                                          |           |
|----------|--------------------------------------------------------------------------|-----------|
| 4.2      | Block cyclor unit .....                                                  | 33        |
| 4.2.1    | Thermal block cyclor .....                                               | 33        |
| 4.2.2    | Multiwell plate mount .....                                              | 34        |
| 4.3      | Detection unit .....                                                     | 35        |
| 4.3.1    | Optic module .....                                                       | 35        |
| 4.3.2    | Filter module .....                                                      | 36        |
| 4.3.3    | CCD camera .....                                                         | 37        |
| 4.4      | Detection channels .....                                                 | 38        |
| 4.5      | Disposables .....                                                        | 39        |
| 4.6      | Reagents .....                                                           | 41        |
| 4.7      | Additional equipment .....                                               | 41        |
| <b>5</b> | <b>Installation .....</b>                                                | <b>42</b> |
| 5.1      | Installing the LightCycler® 96 Instrument .....                          | 42        |
| 5.1.1    | Installation requirements .....                                          | 42        |
| 5.1.2    | Space and power requirements .....                                       | 43        |
| 5.1.3    | Assembling the instrument .....                                          | 44        |
| 5.2      | Installing and configuring the LightCycler® 96 Instrument Software ..... | 50        |
| 5.2.1    | Installing the LightCycler® 96 Instrument Software .....                 | 50        |
| 5.2.2    | Configuring a one-to-one connection .....                                | 50        |
| 5.2.3    | Configuring an Ethernet network connection .....                         | 55        |
| 5.3      | Installing the LightCycler® 96 Application Software .....                | 57        |
| 5.3.1    | System requirements .....                                                | 57        |
| 5.3.2    | Installing the LightCycler® 96 Application Software .....                | 57        |
| 5.3.3    | The LightCycler® 96 Application Software home directory .....            | 58        |
| 5.3.4    | Uninstalling the LightCycler® 96 Application Software .....              | 59        |
| 5.4      | Managing updates .....                                                   | 60        |
| 5.4.1    | Installing a LightCycler® 96 Application Software update .....           | 60        |
| 5.4.2    | Installing a LightCycler® 96 Instrument Software update .....            | 60        |
| 5.4.3    | Upgrading the LightCycler® 96 Instrument Software Version 1.0 .....      | 62        |
| 5.4.4    | Installing a firmware update .....                                       | 63        |
| <b>6</b> | <b>Detection formats .....</b>                                           | <b>64</b> |
| 6.1      | Monitoring PCR with an intercalating fluorescent dye .....               | 65        |
| 6.2      | Monitoring PCR with hydrolysis probes .....                              | 66        |
| <b>7</b> | <b>Analysis principles .....</b>                                         | <b>68</b> |
| 7.1      | Quantification analysis .....                                            | 68        |
| 7.1.1    | Absolute quantification analysis .....                                   | 71        |
| 7.1.2    | Relative quantification analysis .....                                   | 72        |
| 7.1.3    | Qualitative detection analysis .....                                     | 77        |
| 7.2      | Endpoint genotyping analysis .....                                       | 78        |
| 7.3      | T <sub>m</sub> calling analysis .....                                    | 79        |
| 7.4      | High resolution melting analysis .....                                   | 81        |

|          |                                             |            |
|----------|---------------------------------------------|------------|
| <b>B</b> | <b>LightCycler® 96 Application Software</b> | <b>85</b>  |
| <b>1</b> | <b>Overview</b>                             | <b>89</b>  |
| 1.1      | Starting the software                       | 90         |
| 1.2      | Startup wizard                              | 90         |
| 1.3      | The main window                             | 93         |
| 1.3.1    | Menu bar                                    | 94         |
| 1.3.2    | Tool bar                                    | 96         |
| 1.3.3    | Working window area tabs                    | 97         |
| 1.3.4    | Experiment bar                              | 97         |
| 1.4      | General software conventions                | 98         |
| 1.4.1    | Regional settings                           | 98         |
| 1.4.2    | Buttons                                     | 98         |
| 1.4.3    | Input fields                                | 98         |
| 1.4.4    | Working with tables                         | 99         |
| 1.4.5    | Working with graphs                         | 106        |
| 1.4.6    | Working with heat maps                      | 109        |
| 1.4.7    | Working with plate views                    | 111        |
| 1.4.8    | Working with sections                       | 112        |
| 1.5      | Experiments                                 | 113        |
| 1.5.1    | Experiment file types                       | 113        |
| 1.5.2    | Creating an experiment                      | 113        |
| 1.5.3    | Opening an experiment                       | 115        |
| 1.5.4    | Saving an experiment                        | 116        |
| 1.5.5    | Experiment properties                       | 117        |
| 1.5.6    | Experiment report                           | 118        |
| 1.6      | Import, export, and file transfer options   | 121        |
| 1.6.1    | Import data                                 | 121        |
| 1.6.2    | Export data                                 | 122        |
| 1.7      | Disregarding positions from an analysis     | 123        |
| 1.8      | Exiting the software                        | 123        |
| <b>2</b> | <b>Tools</b>                                | <b>124</b> |
| 2.1      | Instrument Manager                          | 124        |
| 2.1.1    | Instruments window area                     | 125        |
| 2.1.2    | Information tab                             | 127        |
| 2.1.3    | Send/Receive Experiments tab                | 128        |
| 2.1.4    | Online Monitoring tab                       | 130        |
| 2.2      | Result Batch Export                         | 131        |
| 2.2.1    | Analysis type                               | 132        |
| 2.2.2    | File selection                              | 132        |
| 2.2.3    | Export                                      | 133        |
| <b>3</b> | <b>Preferences</b>                          | <b>134</b> |
| <b>4</b> | <b>Run Editor tab</b>                       | <b>135</b> |
| 4.1      | Programs window area                        | 135        |
| 4.1.1    | Programs list buttons                       | 136        |
| 4.1.2    | Programs list shortcut menu                 | 136        |
| 4.1.3    | Adding a new program                        | 136        |
| 4.2      | Steps window area                           | 138        |
| 4.2.1    | Steps list buttons                          | 138        |
| 4.2.2    | Steps list shortcut menu                    | 138        |
| 4.2.3    | Step settings                               | 139        |
| 4.3      | Measurement window area                     | 141        |
| 4.4      | Temperature Profile window area             | 142        |

|          |                                                                 |     |
|----------|-----------------------------------------------------------------|-----|
| <b>5</b> | <b>Sample Editor tab</b>                                        | 143 |
| 5.1      | Plate View tab                                                  | 144 |
| 5.1.1    | Multiwell plate image                                           | 145 |
| 5.1.2    | Reaction Properties window area                                 | 145 |
| 5.1.3    | Replicate Group window area                                     | 147 |
| 5.1.4    | Visible Details                                                 | 148 |
| 5.1.5    | Print/Save Plate                                                | 148 |
| 5.1.6    | Plate ID                                                        | 149 |
| 5.1.7    | Failure Constraints                                             | 150 |
| 5.1.8    | Auto Standard Curve                                             | 151 |
| 5.1.9    | Clear Wells/Set to Default                                      | 153 |
| 5.2      | Table View tab                                                  | 154 |
| 5.2.1    | Sample table                                                    | 155 |
| 5.2.2    | Exporting the sample list                                       | 156 |
| 5.2.3    | Importing sample data                                           | 157 |
| <b>6</b> | <b>Raw Data tab</b>                                             | 159 |
| <b>7</b> | <b>Analysis tab</b>                                             | 162 |
| 7.1      | Absolute quantification                                         | 166 |
| 7.1.1    | Abs Quant Settings                                              | 167 |
| 7.1.2    | Amplification Curves                                            | 169 |
| 7.1.3    | Heat Map                                                        | 170 |
| 7.1.4    | Result Table                                                    | 171 |
| 7.1.5    | Standard Curves                                                 | 174 |
| 7.1.6    | Melting Peaks                                                   | 174 |
| 7.1.7    | Cq Bars                                                         | 175 |
| 7.2      | Relative quantification                                         | 176 |
| 7.2.1    | Rel Quant Settings                                              | 177 |
| 7.2.2    | Amplification Curves                                            | 179 |
| 7.2.3    | Ratio Bars                                                      | 180 |
| 7.2.4    | Result Table                                                    | 181 |
| 7.2.5    | Standard Curves                                                 | 185 |
| 7.2.6    | Melting Peaks                                                   | 185 |
| 7.2.7    | Heat Map                                                        | 185 |
| 7.2.8    | Cq Bars                                                         | 185 |
| 7.3      | Qualitative Detection                                           | 186 |
| 7.3.1    | Qualitative Detection settings for a dual- or multi-color setup | 187 |
| 7.3.2    | Qualitative Detection Settings                                  | 187 |
| 7.3.3    | Amplification Curves                                            | 189 |
| 7.3.4    | Heat Map                                                        | 189 |
| 7.3.5    | Combined Call Heat Map                                          | 190 |
| 7.3.6    | Result Table                                                    | 191 |
| 7.4      | Endpoint genotyping                                             | 193 |
| 7.4.1    | Endpoint Genotyping Settings                                    | 194 |
| 7.4.2    | Amplification Curves                                            | 195 |
| 7.4.3    | Scatter Plot                                                    | 196 |
| 7.4.4    | Heat Map                                                        | 198 |
| 7.4.5    | Result Table                                                    | 199 |
| 7.5      | T <sub>m</sub> calling                                          | 200 |
| 7.5.1    | Melting Analysis Parameters                                     | 201 |
| 7.5.2    | Melting Curves                                                  | 203 |
| 7.5.3    | Melting Peaks                                                   | 203 |
| 7.5.4    | Heat Map                                                        | 204 |
| 7.5.5    | Result Table                                                    | 205 |
| 7.5.6    | Amplification Curves                                            | 206 |

|       |                                        |     |
|-------|----------------------------------------|-----|
| 7.6   | High Resolution Melting .....          | 207 |
| 7.6.1 | Select HRM Gene .....                  | 208 |
| 7.6.2 | High Resolution Melting Settings ..... | 208 |
| 7.6.3 | Melting Curves .....                   | 212 |
| 7.6.4 | Normalized Melting Curves .....        | 213 |
| 7.6.5 | Normalized Melting Peaks .....         | 215 |
| 7.6.6 | Difference Plot .....                  | 215 |
| 7.6.7 | Result Table .....                     | 216 |
| 7.6.8 | Heat Map .....                         | 217 |
| 7.6.9 | Amplification Curves .....             | 217 |
| 7.7   | Exporting analysis results .....       | 218 |
| 7.7.1 | Exporting the result table .....       | 218 |
| 7.7.2 | Exporting multiple result data .....   | 218 |

|          |                                                 |            |
|----------|-------------------------------------------------|------------|
| <b>C</b> | <b>LightCycler® 96 Instrument Software</b>      | <b>219</b> |
| <b>1</b> | <b>Overview</b> .....                           | <b>221</b> |
| 1.1      | The main window .....                           | 222        |
| 1.1.1    | Status bar .....                                | 223        |
| 1.1.2    | Working window area tabs .....                  | 224        |
| 1.1.3    | Global action bar .....                         | 225        |
| 1.1.4    | Alarms window area .....                        | 226        |
| 1.2      | General software conventions .....              | 227        |
| 1.2.1    | Buttons .....                                   | 227        |
| 1.2.2    | Input fields .....                              | 227        |
| 1.2.3    | Working with tables .....                       | 228        |
| 1.3      | Experiments .....                               | 229        |
| 1.3.1    | Experiment file types .....                     | 229        |
| 1.3.2    | Creating an experiment .....                    | 229        |
| 1.3.3    | Opening an experiment .....                     | 232        |
| 1.3.4    | Saving an experiment .....                      | 233        |
| 1.4      | Import, export, and file transfer options ..... | 234        |
| 1.4.1    | Import data .....                               | 234        |
| 1.4.2    | Export data .....                               | 235        |
| 1.5      | Exiting the software .....                      | 236        |
| <b>2</b> | <b>Overview tab</b> .....                       | <b>237</b> |
| 2.1      | Experiments table .....                         | 237        |
| 2.2      | Control bar .....                               | 240        |
| <b>3</b> | <b>Run Editor tab</b> .....                     | <b>242</b> |
| 3.1      | Measurement tab .....                           | 242        |
| 3.2      | Profile tab .....                               | 245        |
| 3.2.1    | Programs window area .....                      | 245        |
| 3.2.2    | Adding a new program .....                      | 246        |
| 3.2.3    | Steps window area .....                         | 247        |
| 3.3      | Temperature Profile window area .....           | 249        |
| <b>4</b> | <b>Raw Data tab</b> .....                       | <b>250</b> |
| 4.1      | Experiment progress window area .....           | 250        |
| 4.2      | Graphs window area .....                        | 251        |
| <b>5</b> | <b>Utilities tab</b> .....                      | <b>253</b> |
| 5.1      | Instrument tab .....                            | 253        |
| 5.1.1    | Self Test Report .....                          | 254        |
| 5.1.2    | Current Date .....                              | 255        |
| 5.2      | Configuration tab .....                         | 256        |
| 5.2.1    | Device Name / Hostname .....                    | 257        |
| 5.2.2    | Network Information .....                       | 257        |
| 5.2.3    | Email Information .....                         | 259        |
| 5.2.4    | Remote Monitoring .....                         | 262        |
| 5.2.5    | Automated Backup to Network Share .....         | 263        |

|          |                                                                                               |            |
|----------|-----------------------------------------------------------------------------------------------|------------|
| 5.3      | Service tab .....                                                                             | 264        |
| 5.3.1    | Axeda Service Client .....                                                                    | 264        |
| 5.3.2    | Export Service Log Files to USB Drive .....                                                   | 266        |
| 5.3.3    | Backup/Restore/Reset .....                                                                    | 267        |
| 5.3.4    | Recalibrate Touch Screen .....                                                                | 269        |
| 5.3.5    | Lock Instrument for Transportation .....                                                      | 271        |
| <b>6</b> | <b>Alarms and messages</b> .....                                                              | <b>272</b> |
| 6.1      | Alarm history .....                                                                           | 273        |
| 6.2      | Detailed information .....                                                                    | 275        |
| <b>7</b> | <b>Help browser</b> .....                                                                     | <b>276</b> |
| <b>D</b> | <b>Cleaning and care</b> .....                                                                | <b>277</b> |
| <b>1</b> | <b>General maintenance</b> .....                                                              | <b>279</b> |
| <b>2</b> | <b>Cleaning instructions</b> .....                                                            | <b>279</b> |
| <b>3</b> | <b>Unlocking the loading module</b> .....                                                     | <b>281</b> |
| <b>4</b> | <b>Exchanging the ventilation dust filters</b> .....                                          | <b>283</b> |
| <b>5</b> | <b>Handling fuses</b> .....                                                                   | <b>285</b> |
| <b>6</b> | <b>Packing the instrument for shipping</b> .....                                              | <b>287</b> |
| 6.1      | Placing the transport locking device, if the instrument initializes .....                     | 287        |
| 6.2      | Placing the transport locking failure state foam, if the instrument does not initialize ..... | 289        |
| 6.3      | Packing the instrument .....                                                                  | 290        |
| <b>E</b> | <b>Troubleshooting</b> .....                                                                  | <b>293</b> |
| <b>1</b> | <b>System messages and errors</b> .....                                                       | <b>295</b> |
| <b>2</b> | <b>Remote service</b> .....                                                                   | <b>304</b> |
| <b>F</b> | <b>Appendix</b> .....                                                                         | <b>307</b> |
| <b>1</b> | <b>Ordering information</b> .....                                                             | <b>309</b> |
| <b>2</b> | <b>Index</b> .....                                                                            | <b>310</b> |

# Prologue

## I Revision history

| Operator's Guide Version | Software Version | Revision Date | Changes                                                                                                                                                                                                                                                                                                                                                                                                                                        |
|--------------------------|------------------|---------------|------------------------------------------------------------------------------------------------------------------------------------------------------------------------------------------------------------------------------------------------------------------------------------------------------------------------------------------------------------------------------------------------------------------------------------------------|
| V1.0                     | V1.0             | August 2012   | First edition                                                                                                                                                                                                                                                                                                                                                                                                                                  |
| V2.0                     | V1.1             | May 2013      | <ul style="list-style-type: none"> <li>▶ Chapter B, section "Qualitative detection" added to describe the new qualitative detection software module.</li> <li>▶ Chapter B, section "High resolution melting" added to describe new high resolution melting software module.</li> <li>▶ Chapter A adapted due to new hardware design and packaging.</li> <li>▶ Various corrections and improvements to the manual since version 1.0.</li> </ul> |

© Copyright 2012, Roche Diagnostics GmbH. All rights reserved.

Information in this document is subject to change without notice. No part of this document may be reproduced or transmitted in any form or by any means, electronic or mechanical, for any purpose, without the express written permission of Roche Diagnostics GmbH.

Questions or comments regarding the contents of this Operator's Guide can be directed to your local Roche Diagnostics representative.

Every effort has been made to ensure that all the information contained in the LightCycler® 96 System Operator's Guide is correct at the time of publishing.

However, Roche Diagnostics GmbH reserves the right to make any changes necessary without notice as part of ongoing product development.

## II Contact addresses

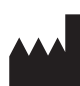

### Manufacturer

Roche Diagnostics GmbH  
Sandhofer Straße 116  
68305 Mannheim  
Germany

### Distribution

Roche Diagnostics GmbH  
Sandhofer Straße 116  
68305 Mannheim  
Germany

### Distribution in USA

Roche Diagnostics  
9115 Hague Road  
PO Box 50457  
Indianapolis, IN 46250  
USA

### III Declaration of conformity

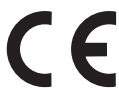

The instrument meets the requirements laid down in Council Directive 2004/108/EC relating to "Electromagnetic Compatibility" and Council Directive 2006/95/EC relating to "Low Voltage Equipment".

The following standards were applied: IEC/EN 61326-1 (EMC), IEC/EN 61010-1 (Safety), and IEC/EN 61010-2-081.

### IV Warranty

The warranty conditions are specified in the sales contract. Contact your local Roche Diagnostics representative for further information.

Any unauthorized modification of the LightCycler® 96 Instrument and/or the LightCycler® 96 Software will result in the invalidation of the guarantee and service contract.

### V Trademarks

LC, LIGHTCYCLER, MAGNA PURE, RESOLIGHT and REALTIME READY are trademarks of Roche.

Exiqon and ProbeLibrary are registered trademarks of Exiqon A/S, Vedbaek, Denmark.

SYBR is a registered trademark of Life Technologies Corporation.

All other product names and trademarks are the property of their respective owners.

### VI Intended use

The LightCycler® 96 Instrument is intended for performing rapid, accurate polymerase chain reaction (PCR) in combination with real-time, online detection of DNA-binding fluorescent dyes or labeled probes, enabling quantification or characterization of a target nucleic acid.

The LightCycler® 96 System is intended for life science research only. It must only be used by laboratory professionals trained in laboratory techniques, who have studied the Instructions for Use of this instrument. The LightCycler® 96 Instrument is not for use in diagnostic procedures.

The LightCycler® 96 System is intended for indoor use only.

### VII License statements for the LightCycler® 96 Instrument

NOTICE: For patent license limitations for individual products please refer to:  
[www.technical-support.roche.com](http://www.technical-support.roche.com).

## VIII Software License Agreement

Read the following terms and conditions of this Software License Agreement ("Agreement") carefully before installing the LightCycler® 96 Software, hereinafter referred to as ("Software"). Proceeding with the installation of the Software will constitute acceptance of the terms and conditions of this Agreement. By accepting the terms and conditions of this Agreement, the end-user ("Licensee") assumes all responsibility and liability for the selection of this Software to achieve the intended results, and for its installation and subsequent use. If Licensee is not willing to be bound by the terms and conditions of this Agreement, the Software package must be promptly returned to Roche ("Supplier") with a copy of the receipt against refunding of the purchase price for this Software.

### 1 PROGRAM LICENSE AGREEMENT

Licensee assumes all responsibility and liability for the selection of this Software to achieve the intended results, and for its installation and subsequent use. The Software is protected by copyright.

### 2 GRANT OF SOFTWARE LICENSE

Supplier is entitled to grant to Licensee subject to continuous compliance with all the provisions hereinafter, a non-exclusive, single-use license to use the Software upon the terms and conditions contained in this Agreement.

#### Licensee may:

- a. Use the Software on workstations which have to be owned, leased or otherwise controlled by Licensee, whether in a network or other configuration.
- b. Transfer the Software by assigning the rights under this Agreement to another party, provided that the other party agrees in writing to accept the terms and conditions of this Agreement. In addition, Licensee must ensure that the copyright notice is maintained on the Software transferred.

#### Licensee may not:

- a. Use the Software, in whole or in part, except as expressly provided in this Agreement.
- b. Copy, sell, or otherwise transfer the Software or assign its rights under this Agreement, in whole or in part, to another party, except as expressly provided in this Agreement.
- c. Rent, distribute, license or sublicense the Software.
- d. Create derivative works based on Software.
- e. Modify, adapt, translate, reverse engineer, decompile or disassemble the Software. Supplier reserves all rights not expressly granted herein, including, but not limited to, the rights to market the Software either directly or through affiliates, distributors and/or third parties.

For further information, please contact your local Roche Applied Science support organization. You will find the contact information on the following webpage: [www.roche-applied-science.com](http://www.roche-applied-science.com).

### 3 LIMITED WARRANTY

The Software is provided "as is" without warranty of any kind, either expressed or implied, including, but not limited to the implied warranties of merchantability and fitness for a particular purpose. The entire risk as to the quality and performance of the Software is with Licensee, should the Software prove to be defective. Licensee assumes the entire costs of all necessary servicing, repair, or correction. However, Supplier warrants that the program media on which the Software is furnished is free from defects in materials and workmanship under normal use for a period of ninety (90) days from the date of delivery as evidenced by a copy of your receipt. SUPPLIER MAKES NO FURTHER WARRANTIES OR GUARANTEES NOR EXPLICIT NOR IMPLIED.

## **4        DISCLAIMER OF WARRANTIES**

AS FAR AS PERMITTED UNDER THE GOVERNING LAW AS SET FORTH UNDER SECTION 11 OF THIS AGREEMENT THE WARRANTY SET FORTH IN THE PREVIOUS PARAGRAPH, IS IN LIEU OF ALL OTHER WARRANTIES, EXPRESS OR IMPLIED, ARISING BY LAW, FROM A COURSE OF PERFORMANCE, A COURSE OF DEALING, TRADE USAGE, OR OTHERWISE. AS FAR AS PERMITTED UNDER THE GOVERNING LAW AS SET FORTH UNDER SECTION 11 OF THIS AGREEMENT SUPPLIER AND ANY ENTITY CONTROLLING, CONTROLLED BY OR UNDER COMMON CONTROL WITH SUPPLIER ("SUPPLIER'S AFFILIATE") SPECIFICALLY DISCLAIM, WITHOUT LIMITATION, ALL WARRANTIES OF ANY KIND, WHETHER EXPRESS OR IMPLIED, INCLUDING, WITHOUT LIMITATION, THE IMPLIED WARRANTIES OF MERCHANTABILITY, FITNESS FOR A PARTICULAR PURPOSE, AND NON-INFRINGEMENT. SUPPLIER AND SUPPLIER'S AFFILIATES MAKE NO REPRESENTATION OR WARRANTY AS TO THE SOFTWARE OR AS TO THE RESULTS TO BE ATTAINED BY LICENSEE OR ANY THIRD PARTY FROM THE SOFTWARE. LICENSEE ACKNOWLEDGES THAT IT HAS NOT RELIED UPON ANY REPRESENTATIONS OR WARRANTIES MADE BY SUPPLIER OR A SUPPLIER'S AFFILIATE EXCEPT FOR THOSE EXPRESSLY AND SPECIFICALLY SET FORTH IN THIS AGREEMENT.

## **5        LIMITATIONS OF REMEDIES**

Supplier's sole liability and Licensee's sole remedy shall be:

- a. The replacement of the program media not meeting Supplier's limited warranty and which is returned to Supplier with a copy of Licensee's receipt;
- b. If Supplier is unable to deliver replacement of program media which is free of defects in material and workmanship, Licensee may terminate this Agreement by returning the Software and a copy of Licensee's receipt to Supplier, and Licensee's money will be refunded.

IN NO EVENT WILL SUPPLIER OR ANY OF SUPPLIER'S AFFILIATES (OR THEIR RESPECTIVE OFFICERS, EMPLOYEES, CONSULTANTS, ATTORNEYS OR AGENTS), BE LIABLE FOR ANY SPECIAL, INDIRECT, INCIDENTAL, OR CONSEQUENTIAL DAMAGES (INCLUDING, BUT NOT LIMITED TO, LOST PROFITS, LOST DATA OR INFORMATION, LOSS OF USE OF THE SOFTWARE, BUSINESS INTERRUPTION, LOSS OF BUSINESS REPUTATION OR GOODWILL, OR DOWNTIME COSTS) WHICH THE LICENSEE OR THIRD PARTIES MAY INCUR OR EXPERIENCE, DIRECTLY OR INDIRECTLY ARISING OUT OF OR RELATING TO THE SOFTWARE, THIS AGREEMENT, OR THE TERMINATION OF THIS AGREEMENT, EVEN IF SUPPLIER OR A SUPPLIER'S AFFILIATE HAS BEEN ADVISED OF THE POSSIBILITY OF SUCH DAMAGES AND NOTWITHSTANDING ANY FAILURE OF ESSENTIAL PURPOSE. THE AGGREGATE LIABILITY, ON A COMBINED BASIS, OF SUPPLIER AND SUPPLIER'S AFFILIATES (AND THEIR RESPECTIVE OFFICERS, EMPLOYEES CONSULTANTS, ATTORNEYS, AND AGENTS) FOR DAMAGES FOR ANY CAUSE WHATSOEVER DIRECTLY OR INDIRECTLY RELATING TO OR ARISING OUT OF THIS AGREEMENT OR THE SOFTWARE, AND REGARDLESS OF THE FORM OF ACTION, SHALL BE LIMITED TO, AT SUPPLIER'S OPTION, REPLACEMENT OF THE SOFTWARE OR REFUND OF THE FEES RECEIVED BY SUPPLIER OR A SUPPLIER'S AFFILIATE FROM LICENSEE WITH RESPECT TO THE SOFTWARE.

## **6        GENERAL INFORMATION**

Licensee may not sublicense, assign or transfer the license or the Software, in whole or in part, except as expressly provided in this Agreement. Any attempt otherwise to sublicense, assign or transfer any of the rights, duties or obligations hereunder is void.

## **7 INTELLECTUAL PROPERTY RIGHTS**

Licensee shall only hold those rights to the Software that are expressly described in Section 2 of this Agreement. Any other rights with regard to the Software, including without limitation, ownership rights and patent, copyright, trademark, trade secret and other intellectual property rights, shall remain the sole property of Supplier. Licensee will not remove from the Software any references to copyrights, trademarks or other ownership rights, or cover up or alter any such references. Licensee will take all reasonable steps to prevent any unauthorized use, reproduction, sale, or publication of the Software or the unauthorized provision of access thereto. Licensee will indemnify and hold harmless Supplier from any losses, damages, claims and expenses (including, without limitation, reasonable legal expenses) relating to any infringement of the rights of Supplier caused by Licensee, Licensee's breach of this Agreement or Licensee's use of the Software in a manner not authorized under this Agreement.

## **8 DURATION AND TERMINATION**

The Agreement is effective until terminated. Licensee may terminate this Agreement at any time by destroying the Software and documentation relating to the Software in any form. The Agreement will terminate automatically and without notice from Supplier, if Licensee fails to comply with any term or condition of this Agreement. Licensee agrees to destroy the Software upon termination of this Agreement by Supplier. On any termination of this Agreement, all rights of use of the Software held by Licensee shall expire.

## **9 IMPORT, EXPORT AND USE OF THE SOFTWARE**

Licensee shall be exclusively responsible for ensuring compliance with the relevant legislation relating to its rights to import, export or use the Software.

## **10 MISCELLANEOUS**

Should any part of this Agreement be declared void or unenforceable by a court of competent jurisdiction, the remaining terms shall remain in full force and effect. Failure of Supplier to enforce any of its rights in this Agreement shall not be considered a waiver of its rights, including but not limited to its rights to respond to subsequent breaches.

By opening and using this Software Licensee acknowledges that he has read this Agreement, understands it, and agrees to be bound by its terms and conditions. Licensee further agrees that this Agreement is the complete and exclusive statement of the Agreement between Licensee and Supplier and supersedes any proposal or prior agreement, oral or written, any other communications between Licensee and Supplier relating to the subject matter of this Agreement.

The headings of the several Sections of this Agreement are intended for convenience of reference only and are not intended to be a part of or to affect the meaning or interpretation of this Agreement.

## **11 GOVERNING LAW AND PLACE OF JURISDICTION**

This Agreement shall be governed by and construed in accordance with the laws of Switzerland, without giving effect to any choice of law principles thereof. The parties agree that the United Nations Convention on Contracts for the International Sale of Goods (1980) is specifically excluded from application to this Agreement.

The parties agree that courts of Zug, Switzerland, shall have exclusive jurisdiction over any dispute arising out of or in connection with this Agreement.

## IX Open Source licenses

Portions of the LightCycler® 96 Software might include one or more Open Source or commercial software programs. For copyright and other notices and licensing information regarding such software programs included with LightCycler® 96 Software, please refer to the *About* information within the LightCycler® 96 Application Software and the USB drive provided with the product.

## X Preamble

Before setting up operation of the LightCycler® 96 System, it is important to read the user documentation completely. Non-observance of the instructions provided or performing any operations not stated in the user documentation could produce safety hazards.

## XI Contents of this operator's guide

This operator's guide describes the operation of the LightCycler® 96 Instrument. It contains the following chapters:

**Chapter A. System description** contains the installation requirements of the LightCycler® 96 System and a description of the system's components and disposables. This chapter contains the installation and configuration procedure and also gives a short overview of the basic PCR analysis workflow.

**Chapter B. LightCycler® 96 Application Software** explains the functions of the LightCycler® 96 Application Software, running on the customer's computer, in detail.

**Chapter C. LightCycler® 96 Instrument Software** explains the functions of the LightCycler® 96 Instrument Software, running on the LightCycler® 96 Instrument, in detail.

**Chapter D. Cleaning and care** describes the cleaning and care procedures required for the LightCycler® 96 Instrument.

**Chapter E. Troubleshooting** provides troubleshooting and error code information for the LightCycler® 96 Instrument.

**Chapter F. Appendix** contains ordering information and the index.

## XII Conventions used in this guide

### Text Conventions

To present information consistently and make it easy to read, the following text conventions are used in this guide:

|                  |                                                                                                                                            |
|------------------|--------------------------------------------------------------------------------------------------------------------------------------------|
| Numbered list    | Steps in a procedure that must be performed in the order listed.                                                                           |
| Italic type      | Used for operating instructions for the LightCycler® 96 Software. In addition, important notes and information notes are shown in italics. |
| Blue italic type | Refers to a different section in this Operator's Guide, which should be consulted.                                                         |
| [ ]              | Square brackets indicate keys on the keyboard.                                                                                             |
| <>               | Angle brackets indicate variables to be replaced with appropriate values.                                                                  |

### Abbreviations

The following abbreviations are used in this guide:

| Abbreviation | Meaning                                        |
|--------------|------------------------------------------------|
| AC           | Alternating Current                            |
| AT/GC ratio  | Adenine-Thymine/Guanine-Cytosine ratio         |
| Cq           | Quantification Cycle                           |
| CCD          | Charge-Coupled Device                          |
| CSV          | Comma-Separated Value                          |
| Cy5          | Cyanine 5                                      |
| DNS          | Domain Name Service                            |
| DHCP         | Dynamic Host Configuration Protocol            |
| dsDNA        | Double-stranded DNA                            |
| E            | Efficiency                                     |
| EPF          | Endpoint Fluorescence                          |
| FAM          | 6-Carboxyl Fluorescein                         |
| FRET         | Fluorescence Resonance Energy Transfer         |
| GOI          | Gene of Interest                               |
| HEX          | Carboxyl-2',4,4',5',7,7'-Hexachlorofluorescein |
| HRM          | High Resolution Melting                        |
| LED          | Light Emitting Diode                           |
| LAN          | Local Area Network                             |
| NTC          | No Template Control                            |
| NRTC         | Non Reverse Transcription Control              |
| PCR          | Polymerase Chain Reaction                      |
| PE           | Protection Earth                               |
| PNG          | Portable Network Graphics                      |
| qPCR         | Quantitative Real-Time PCR                     |

| Abbreviation | Meaning                                             |
|--------------|-----------------------------------------------------|
| RDML         | Real Time Data Management Language                  |
| SNP          | Single Nucleotide Polymorphism                      |
| SD           | Standard Deviation                                  |
| SVG          | Scalable Vector Graphics                            |
| SYBR         | SYBR Green I (a common double-stranded binding dye) |
| TCP/IP       | Transmission Control Protocol/Internet Protocol     |
| $T_m$        | Melting Temperature                                 |
| UPS          | Uninterruptible Power Supply                        |
| USB          | Universal Serial Bus                                |
| VIC          | Reporter Dye for Hydrolysis Probes                  |

### Symbols used in this guide

| Symbol                                                                              | Meaning                      | Description                                                                                                                                                                                                    |
|-------------------------------------------------------------------------------------|------------------------------|----------------------------------------------------------------------------------------------------------------------------------------------------------------------------------------------------------------|
|    | WARNING                      | This symbol is used to alert you to the presence of important operating and maintenance instructions in the literature accompanying the instrument. There are no user-serviceable parts inside the instrument. |
|  | HOT SURFACE                  | This symbol is used to label potentially hot instrument surfaces.                                                                                                                                              |
|  | BIO HAZARD                   | This symbol is used to indicate that certain precautions must be taken when working with potentially infectious material.                                                                                      |
|  | DANGEROUS ELECTRICAL VOLTAGE | This symbol is used to indicate the danger of personal injury due to dangerous electrical voltage. Refers to an imminent danger that may result in death or serious personal injury.                           |
|  | KEEP HANDS CLEAR             | This symbol is used to indicate the risk of crushing hands in movable parts.                                                                                                                                   |
|  | IMPORTANT NOTE               | Information critical to the success of the procedure or use of the product.                                                                                                                                    |
|  | INFORMATION NOTE             | Additional information about the current topic or procedure.                                                                                                                                                   |
|  |                              | Procedure continued on next page.                                                                                                                                                                              |
|  |                              | End of procedure.                                                                                                                                                                                              |

**Symbols used on the instrument**

| Symbol                                                                             | Meaning                | Description                                                                                                                     |
|------------------------------------------------------------------------------------|------------------------|---------------------------------------------------------------------------------------------------------------------------------|
|   | MANUFACTURER OF DEVICE | Roche Diagnostics GmbH<br>Sandhofer Strasse 116, D-68305 Mannheim Germany<br>Made in Switzerland                                |
|   | CE MARK                | The CE mark on the instrument type plate indicates conformity with requirements of the directives relevant for this instrument. |
|   | WARNING                | On the instrument type plate.                                                                                                   |
|   | cUL MARK               | On the instrument type plate.                                                                                                   |
|   | HOT SURFACE            | On the loading module.                                                                                                          |
|   | BIO HAZARD             | On the loading module.                                                                                                          |
|  | KEEP HANDS CLEAR       | On the instrument housing (Only visible, when the loading unit is ejected).                                                     |

In addition to these symbols, the following information is provided on the instrument type plate:

- ▶ LightCycler® 96 Instrument
- ▶ Instrument serial number in hexadecimal and in 1D barcode
- ▶ Power supply and mains power consumption: 100-125/200-240 Vac 50/60 Hz 600 VA

## XIII Warnings and precautions

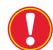

*In an emergency, immediately unplug the instrument.*

The LightCycler® 96 Instrument must only be used by trained and skilled personnel.

It is essential that the following safety information required for installation and operation of the LightCycler® 96 Instrument is carefully read and observed. Please ensure that this safety information is accessible to all personnel working with the LightCycler® 96 Instrument.

### Handling requirements

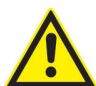

The LightCycler® 96 Instrument is an electromechanical instrument. There is a potential risk to the user from electric shock or physical injury if the instrument is not used according to the instructions given in this manual.

- ▶ Follow all safety instructions printed on or attached to the analytical instrument.
- ▶ Observe all general safety precautions which apply to electrical instruments.
- ▶ Do not access any electrical parts while the LightCycler® 96 Instrument is connected to the mains power supply.
- ▶ Never touch the power cable with wet hands.
- ▶ Never open the housing of the LightCycler® 96 Instrument.
- ▶ Never clean the instrument without disconnecting the power cable.
- ▶ Only authorized service personnel are allowed to perform service or repairs required for this unit.
- ▶ Do not use the network cable outdoors.

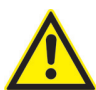

- ▶ Always wear safety goggles and gloves when dealing with toxic, caustic, or infectious materials.



- ▶ Although working with highly purified nucleic acids, for your own safety, please regard all biological material as potentially infectious. Handling and disposal of such material should be performed according to local safety guidelines. Spills should be immediately disinfected with an appropriate disinfectant solution to avoid contamination of laboratory personnel or equipment.
- ▶ For instructions on cleaning the LightCycler® 96 Instrument, see chapter [Cleaning and care](#), on page 277.

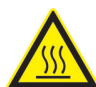

The multiwell plate mount may be hot after an experiment run.

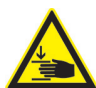

Always keep your hands clear, when closing the loading unit.

---

## General Precautions

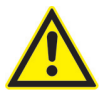

The LightCycler® 96 System contains software that allows it to be connected to a network. Please be aware that such a connection may have an adverse effect on the product's integrity, through, for example, infection with malicious code (viruses, Trojan horses, etc.) or access by unauthorized third parties, such as intrusion by hackers. Roche therefore highly recommends protecting the product against such risks by taking appropriate and state-of-the-art action.

As the product is not intended to be used within networks without an appropriate firewall and has not been designed for such use, Roche assumes no liability in this regard.

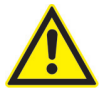

Incorrect positioning of the instrument can cause incorrect results and damage to the equipment. Follow the installation instructions carefully.

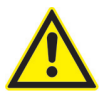

Danger of explosion through sparks. Keep all potentially inflammable or explosive material (for example, anesthetic gas) away from the instrument. Spraying liquid on electrical parts can cause a short circuit and result in fire. Keep the cover closed while the instrument is connected to the mains power supply and do not use sprays in the vicinity of the LightCycler® 96 Instrument. During fire fighting operations, disconnect the LightCycler® 96 Instrument from the mains power supply.

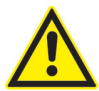

Do not disassemble the instrument.

## Electrical safety

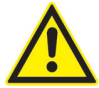

The LightCycler® 96 Instrument is designed in accordance with Protection Class I (IEC). The housing of the instrument is connected to protection earth (PE) by a cable. For protection against electric shock hazards, the instrument must be directly connected to an approved power source such as a three-wire grounded receptacle for the 115/230 V line. Where only an ungrounded receptacle is available, a qualified electrician must replace it with a properly (PE) grounded receptacle in accordance with the local electrical code. No extension must be used.

Any break in the electrical ground path, whether inside or outside the instrument, could create a hazardous condition. Under no circumstances should the operator attempt to modify or deliberately override the safety features of this instrument. If the power cable becomes cracked, frayed, broken, or otherwise damaged, it must be replaced immediately with the equivalent part from Roche Diagnostics.

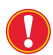

*Please observe the warnings regarding interactions and non-recommended functions. Also bear in mind the potential scope for misuse; it is advisable to draw attention to the possible consequences.*

## XIV Disposal of the instrument

### Disposal recommendations

All electrical and electronic products should be disposed of separately from the municipal waste system. Proper disposal of your old appliance prevents potential negative consequences for the environment and human health.

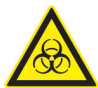

The LightCycler® 96 Instrument must be treated as biologically contaminated hazardous waste. Decontamination (that is, a combination of processes, including cleaning, disinfection, and/or sterilization) is required before reuse, recycling, or disposal.

Dispose of the instrument according to local and/or laboratory regulations.

For more information, contact your local Roche Diagnostics representative.

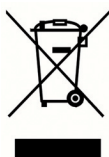

The LightCycler® 96 Instrument USB Drive and the external handheld barcode scanner are covered by the European Directive 2002/96/EC on waste electrical and electronic equipment (WEEE) of the European Parliament and the Council of January 27, 2003.

The USB drive and the barcode scanner must be disposed of via designated collection facilities appointed by government or local authorities.

For more information on disposing of your product, please contact your city authorities, waste disposal service, or your local Roche Diagnostics representative.

---

# **Chapter A**

## **System description**

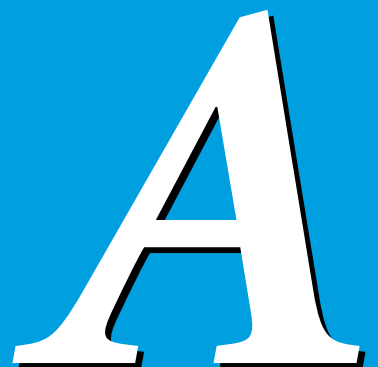

|          |                                                                    |           |
|----------|--------------------------------------------------------------------|-----------|
| <b>A</b> | <b>System description</b>                                          | <b>21</b> |
| <b>1</b> | <b>Introduction</b>                                                | <b>24</b> |
| <b>2</b> | <b>Specifications of the LightCycler® 96 Instrument</b>            | <b>25</b> |
| 2.1      | General specifications                                             | 25        |
| 2.1.1    | Environmental parameters                                           | 25        |
| 2.1.2    | Interfaces                                                         | 26        |
| 2.2      | Technical specifications                                           | 26        |
| 2.3      | Specifications of the detection unit                               | 26        |
| 2.3.1    | Excitation                                                         | 26        |
| 2.3.2    | Detection                                                          | 26        |
| 2.4      | Filter set                                                         | 26        |
| 2.5      | Specifications of the thermal block cycler                         | 27        |
| 2.6      | Specifications of the external handheld barcode scanner            | 27        |
| <b>3</b> | <b>The LightCycler® 96 System Package</b>                          | <b>28</b> |
| <b>4</b> | <b>System description</b>                                          | <b>29</b> |
| 4.1      | The LightCycler® 96 Instrument                                     | 29        |
| 4.1.1    | Loading module                                                     | 30        |
| 4.1.2    | Touchscreen                                                        | 30        |
| 4.1.3    | USB interfaces                                                     | 30        |
| 4.1.4    | Instrument back                                                    | 31        |
| 4.1.5    | Ventilation                                                        | 32        |
| 4.2      | Block cycler unit                                                  | 33        |
| 4.2.1    | Thermal block cycler                                               | 33        |
| 4.2.2    | Multiwell plate mount                                              | 34        |
| 4.3      | Detection unit                                                     | 35        |
| 4.3.1    | Optic module                                                       | 35        |
| 4.3.2    | Filter module                                                      | 36        |
| 4.3.3    | CCD camera                                                         | 37        |
| 4.4      | Detection channels                                                 | 38        |
| 4.5      | Disposables                                                        | 39        |
| 4.6      | Reagents                                                           | 41        |
| 4.7      | Additional equipment                                               | 41        |
| <b>5</b> | <b>Installation</b>                                                | <b>42</b> |
| 5.1      | Installing the LightCycler® 96 Instrument                          | 42        |
| 5.1.1    | Installation requirements                                          | 42        |
| 5.1.2    | Space and power requirements                                       | 43        |
| 5.1.3    | Assembling the instrument                                          | 44        |
| 5.2      | Installing and configuring the LightCycler® 96 Instrument Software | 50        |
| 5.2.1    | Installing the LightCycler® 96 Instrument Software                 | 50        |
| 5.2.2    | Configuring a one-to-one connection                                | 50        |
| 5.2.3    | Configuring an Ethernet network connection                         | 55        |
| 5.3      | Installing the LightCycler® 96 Application Software                | 57        |
| 5.3.1    | System requirements                                                | 57        |
| 5.3.2    | Installing the LightCycler® 96 Application Software                | 57        |
| 5.3.3    | The LightCycler® 96 Application Software home directory            | 58        |
| 5.3.4    | Uninstalling the LightCycler® 96 Application Software              | 59        |
| 5.4      | Managing updates                                                   | 60        |
| 5.4.1    | Installing a LightCycler® 96 Application Software update           | 60        |
| 5.4.2    | Installing a LightCycler® 96 Instrument Software update            | 60        |
| 5.4.3    | Upgrading the LightCycler® 96 Instrument Software Version 1.0      | 62        |
| 5.4.4    | Installing a firmware update                                       | 63        |
| <b>6</b> | <b>Detection formats</b>                                           | <b>64</b> |
| 6.1      | Monitoring PCR with an intercalating fluorescent dye               | 65        |
| 6.2      | Monitoring PCR with hydrolysis probes                              | 66        |

---

|          |                                        |           |
|----------|----------------------------------------|-----------|
| <b>7</b> | <b>Analysis principles .....</b>       | <b>68</b> |
| 7.1      | Quantification analysis .....          | 68        |
| 7.1.1    | Absolute quantification analysis ..... | 71        |
| 7.1.2    | Relative quantification analysis ..... | 72        |
| 7.1.3    | Qualitative detection analysis .....   | 77        |
| 7.2      | Endpoint genotyping analysis .....     | 78        |
| 7.3      | T <sub>m</sub> calling analysis .....  | 79        |
| 7.4      | High resolution melting analysis ..... | 81        |

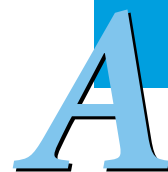

# A

## System description

### 1 Introduction

The LightCycler® 96 System enables you to perform real-time, online PCR combined with rapid cycling of up to 96 samples.

After monitoring fluorescence during nucleic acid amplification, results can be analyzed, for example, by quantification. The outstanding thermal homogeneity and cycling speed of the LightCycler® 96 System provide exact results in a short time.

The optical detection system offers the flexibility to detect a broad range of sequence-dependent probes (for example, hydrolysis probes) and sequence-independent dyes (for example, SYBR Green). It also allows a simultaneous measurement of all wells without sequential scanning, which is especially important for applications like high resolution melting.

The LightCycler® 96 Application Software runs on Microsoft Windows XP and Microsoft Windows 7 platforms. The LightCycler® 96 Application Software and the LightCycler® 96 Instrument Software provide excellent tools to generate high quality data. Advanced software tools facilitate fast, intuitive navigation, allowing easy programming, data capture and analysis. The new software offers a broad range of supported applications combined with a versatile analysis workflow for each application.

- ▶ Acquire relative quantification results in an easy setup of data you provide to the instrument. A correlation matrix will be provided in an attractive, publishable format that takes all relevant parameters into account.
- ▶ Easy import and export functions, email notifications after the run, online monitoring features and server-based network capabilities enable you to communicate your data in whichever way serves your needs.

For detailed information on the broad range of software capabilities and their usage, see chapters *LightCycler® 96 Application Software*, on page 85 and *LightCycler® 96 Instrument Software*, on page 219.

Based on the latest improvements, the LightCycler® 96 Instrument employs advanced state-of-the-art instrument parts (for example, novel optical system and thermal block cycler).

For more detailed information on the LightCycler® 96 System, visit the LightCycler® 96 System Special Interest Site at [www.lightcycler96.com](http://www.lightcycler96.com).

## 2 Specifications of the LightCycler® 96 Instrument

LightCycler® 96 Instrument

Cat. No. 05 815 916 001

### 2.1 General specifications

|                                                |                                                           |
|------------------------------------------------|-----------------------------------------------------------|
| Dimensions                                     | 40 × 40 × 53 cm (W × D × H)                               |
| Weight                                         | Approximately 27 kg                                       |
| Power supply                                   | 100 to 125 V / 200 to 240 V (+/-10%)<br>50/60 Hz (+/-5%)  |
| Mains power consumption                        | 600 W                                                     |
| Noise level                                    |                                                           |
| ▶ During run                                   | < 43 dB(A)                                                |
| ▶ In standby (block cycler cover switched off) | 27 dB(A)                                                  |
| Protection class AC adapter                    | I                                                         |
| Protection class instrument                    | I                                                         |
| Electromagnetic emission                       | Class B according to<br>▶ EN 61326-1<br>▶ 47 CFR, Part 15 |
| Electromagnetic immunity                       | Compliant with EN 61326-1                                 |
| Heat output                                    |                                                           |
| ▶ During run (mean value)                      | 350 W                                                     |
| ▶ In standby (block cycler cover switched off) | 100 W                                                     |

#### 2.1.1 Environmental parameters

|                                                                       |                                                                |
|-----------------------------------------------------------------------|----------------------------------------------------------------|
| Temperatures allowed during transportation/<br>storage/packaging      | -20 to +60°C                                                   |
| Relative humidity allowed during transportation/<br>storage/packaging | 10% to 95%, no condensation                                    |
| Altitude/pressure allowed during transportation/<br>storage/packaging | 0 to 3000 m above sea level<br>106 to 70 kPa                   |
| Temperatures allowed during operation                                 | +15 to +32°C                                                   |
| Relative humidity allowed during operation                            | Max. 80% at +32°C, no condensation<br>Min. 30% at +15 to +32°C |
| Altitude/pressure allowed during operation                            | 0 to 2000 m above sea level<br>106 to 80 kPa *                 |
| Atmospheric conditions during operation                               | Pollution Degree II                                            |

\* For using multiwell plates higher than 2000 m above sea level, hot sealing of the plates is recommended.

### 2.1.2 Interfaces

The LightCycler® 96 Instrument provides the following external interfaces:

| Interface                                     | Device                                                            |
|-----------------------------------------------|-------------------------------------------------------------------|
| Ethernet 100 Base T                           | Connection to a computer for instrument control and data transfer |
| USB 2.0 (on the right side of the instrument) | Connection to USB drive                                           |
| USB 2.0 (on the instrument back)              | Connection to external handheld barcode scanner                   |

## 2.2 Technical specifications

All values are determined under standard laboratory conditions.

|                           |                                                           |
|---------------------------|-----------------------------------------------------------|
| Number of samples per run | Maximum 96                                                |
| PCR volume                | 10 to 50 µl                                               |
| Processing time           | Approximately 40 to 50 minutes for standard PCR protocols |

## 2.3 Specifications of the detection unit

### 2.3.1 Excitation

|                  |                        |
|------------------|------------------------|
| Type             | White LED              |
| Average lifetime | Approximately 10 000 h |

### 2.3.2 Detection

|                            |                                    |
|----------------------------|------------------------------------|
| Type                       | Charge-Coupled Device (CCD) camera |
| Integration time           |                                    |
| ▶ Dynamic mode             | 10 ms to 1 s                       |
| ▶ Manual mode              | up to 4 s                          |
| Integration time selection | Dynamic or manual                  |
| Reproducibility            | ≤ 1% CV                            |
| Well-to-well crosstalk     | < 0.5%                             |
| Spectral crosstalk         | < 4%                               |

## 2.4 Filter set

| Excitation wavelength [nm] |           | Emission wavelength [nm] |           |
|----------------------------|-----------|--------------------------|-----------|
| Bandpass                   | Bandwidth | Bandpass                 | Bandwidth |
| 470                        | 30        | 514                      | 20        |
| 533                        | 15        | 572                      | 20        |
| 577                        | 20        | 620                      | 25        |
| 645                        | 20        | 697.5                    | 45        |

## 2.5 Specifications of the thermal block cycler

|                                   |                                   |
|-----------------------------------|-----------------------------------|
| Temperature control               | Peltier-based heating and cooling |
| Temperature range                 | +37 to +98°C                      |
| Heating rate                      | 4.4°C/s                           |
| Cooling rate                      | 2.2°C/s                           |
| Thermal homogeneity               | ±0.3°C                            |
| Thermal accuracy                  | ±0.2°C                            |
| Block cycler cover during cycling | 105°C +/-3°C                      |

## 2.6 Specifications of the external handheld barcode scanner

Customers can purchase the external handheld barcode scanner for the LightCycler® 96 Instrument as an optional accessory:

|                                   |                         |
|-----------------------------------|-------------------------|
| LightCycler® USB Handheld Scanner | Cat. No. 05 825 601 001 |
|-----------------------------------|-------------------------|

The external handheld barcode scanner is used to scan the ID of a multiwell plate labeled with a barcode into the *Plate Id* field of the LightCycler® 96 Software. It is connected to the LightCycler® 96 Instrument via the USB interface on the back of the instrument.

The LightCycler® 96 System supports the following barcode types by default:

| Barcode type | Resolution | Checkdigit                                | Min. data characters |
|--------------|------------|-------------------------------------------|----------------------|
| Code 39      | 250 to 500 | x<br>start/stop character not transmitted | 1                    |
| Code 2 of 5  | 250 to 500 | x                                         | 1                    |
| Code 128     | 250 to 500 | –                                         | 1                    |

For detailed information on specifying customer-specific barcode types, refer to the documentation provided with the external handheld barcode scanner. It is possible to restore the default settings if required.

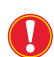

*Note that the type of the external handheld barcode scanner is subject to change without notice. The specifications listed here apply to the type provided at the time of publishing of this Operator's Guide.*

### 3 The LightCycler® 96 System Package

The table below lists the contents of the LightCycler® 96 System Package. Use this list to verify that nothing is missing.

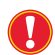

*After opening, check for any damage that may have occurred in transit. Report any signs of damage to your local Roche Diagnostics representative.*

| Quantity | Component                                                                                                                                                                                                                                                                                                    |
|----------|--------------------------------------------------------------------------------------------------------------------------------------------------------------------------------------------------------------------------------------------------------------------------------------------------------------|
| 1        | LightCycler® 96 Instrument                                                                                                                                                                                                                                                                                   |
| 2        | LightCycler® 96 Quick Guides: <ul style="list-style-type: none"> <li>▶ System installation</li> <li>▶ Programming and running an experiment</li> </ul>                                                                                                                                                       |
| 1        | LightCycler® 96 USB Drive containing: <ul style="list-style-type: none"> <li>▶ Executables for the software</li> <li>▶ License texts</li> <li>▶ LightCycler® 96 System Guides</li> <li>▶ Decontamination and shipment preparation</li> <li>▶ Demo data and experiment templates provided by Roche</li> </ul> |
| 1        | Mains power cable (EU)                                                                                                                                                                                                                                                                                       |
| 1        | Mains power cable (US)                                                                                                                                                                                                                                                                                       |
| 1        | LAN cable (3 m)                                                                                                                                                                                                                                                                                              |
| 2        | Ventilation dust filters                                                                                                                                                                                                                                                                                     |
| 1        | Package fuses FUSE 5x20 T8AH 250V ULR/IEC                                                                                                                                                                                                                                                                    |
| 1        | Sealing foil applicator                                                                                                                                                                                                                                                                                      |

## 4 System description

The LightCycler® 96 System comprises the following main components:

- ▶ The LightCycler® 96 Instrument; see below.
- ▶ The LightCycler® 96 Instrument Software, which is installed on the instrument; see chapter [LightCycler® 96 Instrument Software](#), on page 219.
- ▶ The LightCycler® 96 Application Software, which is installed on a customer's computer; see chapter [LightCycler® 96 Application Software](#), on page 85.
- ▶ The disposables to be used with the LightCycler® 96 Instrument; see section [Disposables](#), on page 39.
- ▶ The reagents to be used in experiments on the LightCycler® 96 Instrument; see section [Reagents](#), on page 41.

### 4.1 The LightCycler® 96 Instrument

The LightCycler® 96 Instrument is a rapid thermal block cycler with integrated real-time, online detection capabilities. This setup enables homogeneous PCR (simultaneous amplification and detection of target nucleic acids). Detection of target nucleic acids is performed by adding either a fluorescent double-stranded-DNA-specific dye or sequence-specific oligonucleotide probes labeled with fluorophores.

Both approaches allow operators to measure the generation of PCR products during amplification, the basis of quantitative real-time PCR (qPCR). Post-PCR analysis of previously generated PCR products using a melting program is used for PCR product characterization. For detailed information on the available detection formats, see section [Detection formats](#), on page 64.

The LightCycler® 96 Instrument comprises two main components:

- ▶ The block cycler unit, including the thermal block cycler with the multiwell plate mount, the cooling elements, the Peltier elements, and the electronics interface; for detailed information, see section [Block cycler unit](#), on page 33.
- ▶ The detection unit, including the optic module, the filter module, and the CCD camera; for detailed information, see section [Detection unit](#), on page 35.

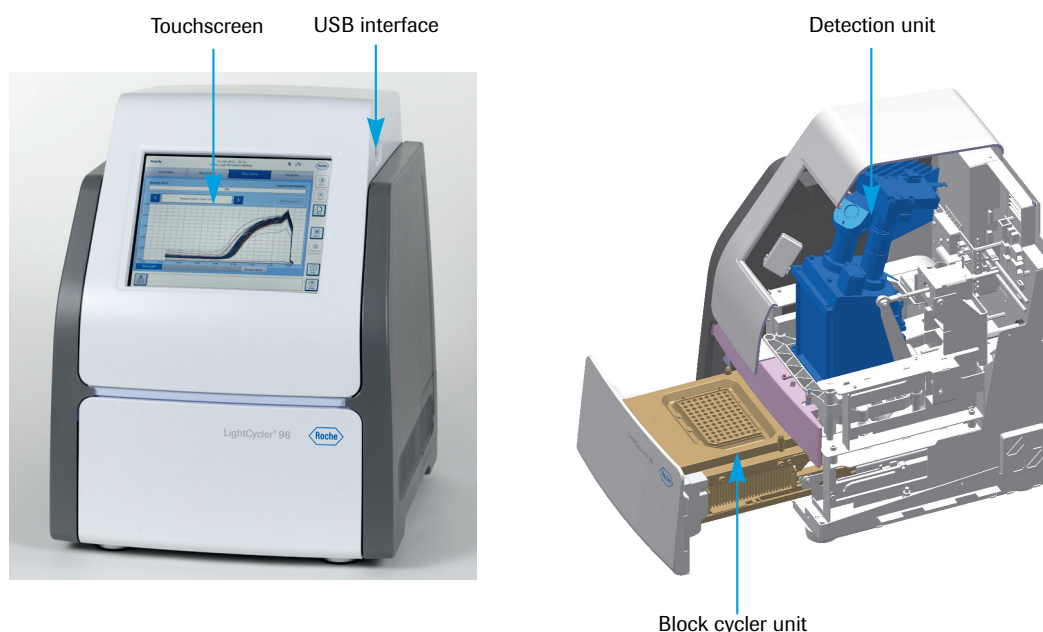

Figure 1: Main components of the LightCycler® 96 Instrument

### 4.1.1 Loading module

The loading module of the LightCycler® 96 Instrument houses the complete thermal block cycler, the electronic interface and the block cycler ventilation. For a detailed description of these components, see the following sections.

The loading module can have the following states:

| Status | Description                                                                                                                                                                                                                                                                                                                                                                                                                                                                                                                                                                                                                                    |
|--------|------------------------------------------------------------------------------------------------------------------------------------------------------------------------------------------------------------------------------------------------------------------------------------------------------------------------------------------------------------------------------------------------------------------------------------------------------------------------------------------------------------------------------------------------------------------------------------------------------------------------------------------------|
| Open   | The loading module is completely opened and ready for loading or unloading the multiwell plate.                                                                                                                                                                                                                                                                                                                                                                                                                                                                                                                                                |
| Locked | The loading module is locked when closed manually after loading the multiwell plate and during the following experiment run.                                                                                                                                                                                                                                                                                                                                                                                                                                                                                                                   |
| Closed | <p>When the experiment run is finished, the LightCycler® 96 Instrument unlocks the loading module.</p> <p>When using the <i>Eject</i> button on the touchscreen, the loading module is pushed forward. The operator can open the loading module completely using the recessed grip.</p> <p> <i>The loading module may only be opened using the 'Eject' button on the touchscreen. Otherwise the instrument changes to the 'Error' state and has to be rebooted. For detailed information, see section <a href="#">Global action bar</a>, on page 225.</i></p> |

For detailed information on cleaning the loading module, see section [Cleaning instructions](#), on page 279.

### 4.1.2 Touchscreen

The touchscreen on the LightCycler® 96 Instrument provides the instrument software. For detailed information, see chapter [LightCycler® 96 Instrument Software](#), on page 219.

The touchscreen provides a screen resolution of 800 x 600 pixels. It is operated by pressing with a finger.

### 4.1.3 USB interfaces

The LightCycler® 96 Instrument provides two USB interfaces:

- ▶ The USB interface on the right side of the instrument only accepts the following USB drives:
  - ▶ USB drives supporting USB 2.0.
  - ▶ USB drives containing only one partition. The instrument cannot identify USB drives with several partitions.

With a USB drive, an experiment can be transferred to the instrument and performed without a connected computer running the LightCycler® 96 Application Software.

- ▶ The USB interface on the back of the instrument exclusively allows connection of an external hand-held barcode scanner. It does not allow connection of a USB drive. For detailed information, see section [Specifications of the external handheld barcode scanner](#), on page 27.

#### 4.1.4 Instrument back

The back of the instrument houses the power box with the instrument's mains power socket and mains power switch, the USB interface for connecting an external handheld barcode scanner, as well as the Ethernet interface required for connecting the LightCycler® 96 Instrument to a network or directly to a computer. For details of the instrument's power supply and Ethernet connection, see section [Installation](#), on page 42.

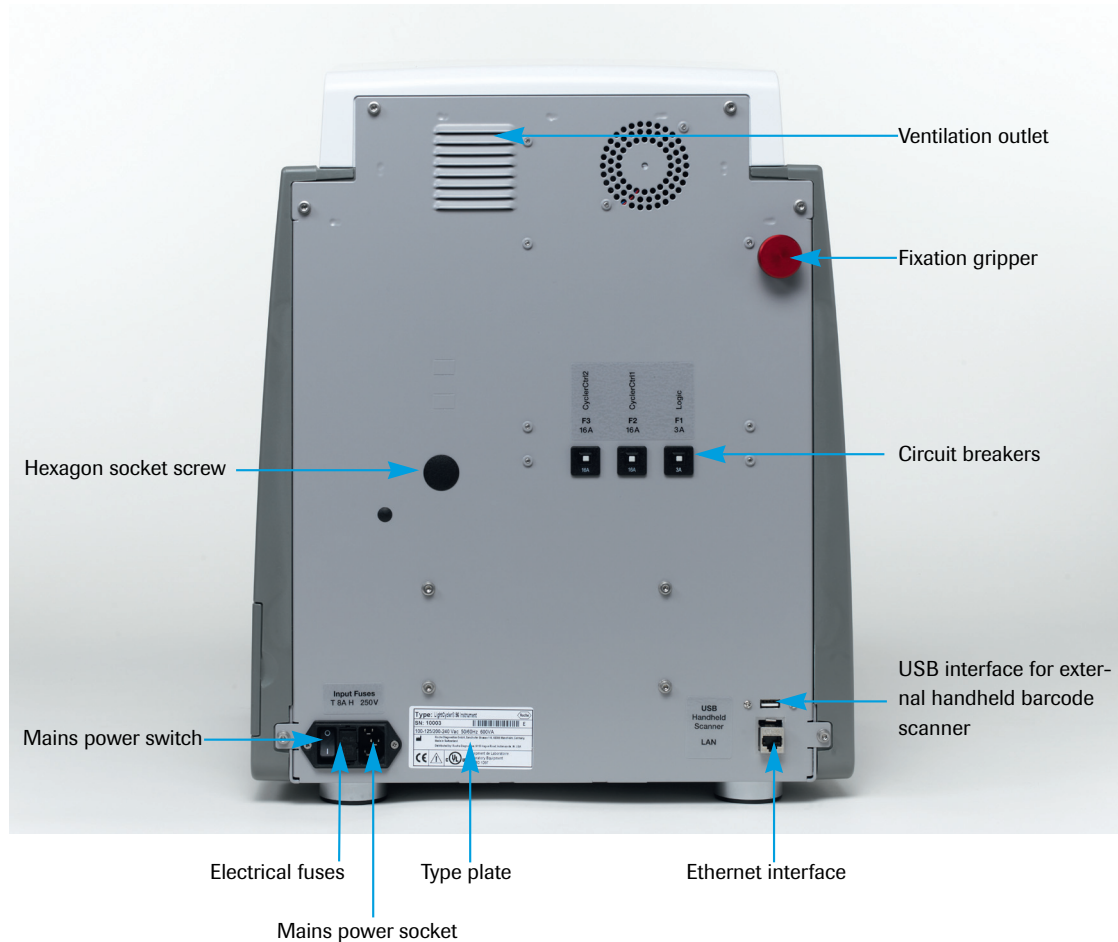

**Figure 2: LightCycler® 96 Instrument back view**

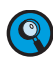

*The fixation gripper is a new device that was introduced for transport protection reasons. It is not present in older hardware versions, and it does not affect the system performance.*

### 4.1.5 Ventilation

Air supply and air evacuation are arranged as follows:

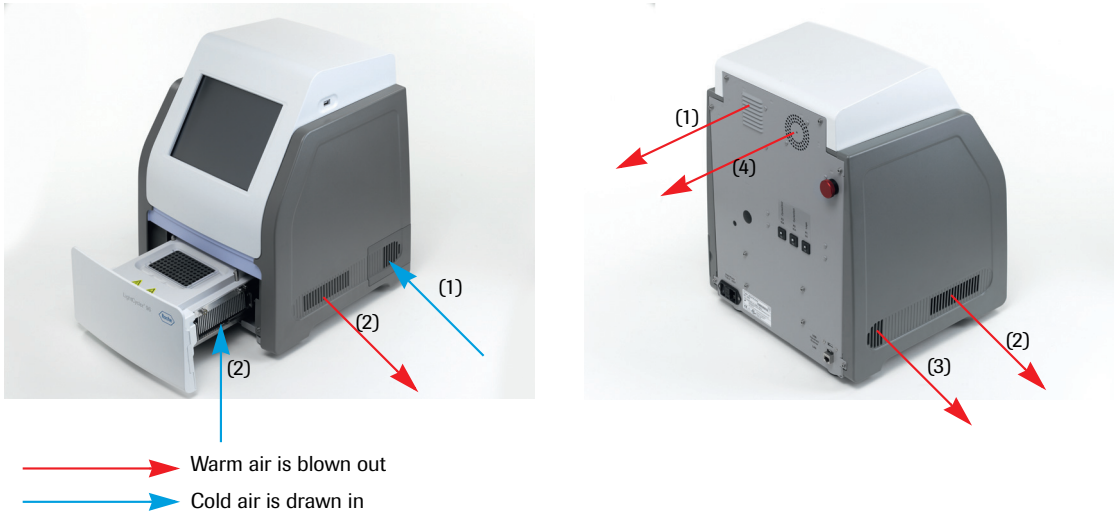

Figure 3: Schematic ventilation overview

|     |                                                                                                                                                                                                                                                                                           |
|-----|-------------------------------------------------------------------------------------------------------------------------------------------------------------------------------------------------------------------------------------------------------------------------------------------|
| (1) | System and LED ventilation.<br>The ventilation inlet on the right side of the instrument is equipped with a ventilation dust filter. For detailed information on changing the ventilation dust filter, see section <a href="#">Exchanging the ventilation dust filters</a> , on page 283. |
| (2) | Block cyclor ventilation.<br>The fan in the block cyclor unit is only operated if the cooling elements need to be cooled down.                                                                                                                                                            |
| (3) | Power box ventilation.                                                                                                                                                                                                                                                                    |
| (4) | Electronics ventilation.                                                                                                                                                                                                                                                                  |

 To facilitate adequate ventilation, the ventilation inlets and outlets must not be obstructed. For detailed information, see section [Installation requirements](#), on page 42.

## 4.2 Block cycler unit

The block cycler unit consists of the following main components:

- ▶ Thermal block cycler, which includes the Peltier elements, thermal interface, cooling elements, and electronics interface; for detailed information, see section [Thermal block cycler](#), below.
- ▶ Block cycler cover.
- ▶ Multiwell plate mount; for detailed information, see section [Multiwell plate mount](#), on page 34.

### 4.2.1 Thermal block cycler

The thermal block cycler provides rapid, precise, and accurate temperature control. A heated lid prevents changes in reaction volume and optical artifacts due to condensation. The silver mount, which has a non-stick coating, has a high thermal conductivity and low thermal mass, allowing speed and precision. The thermal block cycler is driven by six Peltier elements.

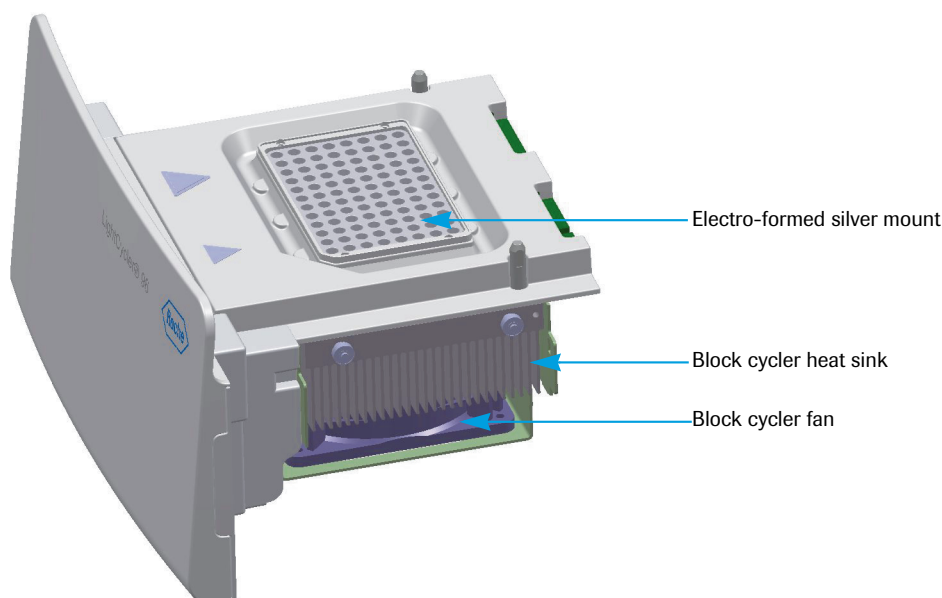

Figure 4: Thermal block cycler

### Ventilation

To cool the thermal block cycler during operation, the block cycler is fitted with a high-efficiency fan. The fan in the block cycler unit is only operated if the electronic power amplifier of the cooling elements exceeds a certain temperature. The air flow is guided through the instrument and expelled on the right and left sides. For detailed information, see section [Ventilation](#), on page 32.

### Block cycler cover

The thermal block cycler has a matching block cycler cover. The lid has 96 pinholes allowing fluorescence detection by the detection unit through the closed lid. During cycling the block cycler cover is pressed onto the multiwell plate and heated. This heating prevents changes in reaction volume and optical artifacts due to condensation.

If the instrument is not used for some time, it changes to standby mode and the block cycler cover is switched off. The cover must be heated again when the operator wants to start an experiment run. The experiment run can be started when the instrument changes to *Ready*.

#### 4.2.2 Multiwell plate mount

The mount is made of silver, has a nonstick coating, and accepts the following disposables:

- ▶ A LightCycler® 480 Multiwell Plate 96. A mechanical coding prevents incorrect loading orientation of the multiwell plate.

LightCycler® 480 Multiwell Plates are labeled with a barcode that can be identified using an external handheld barcode scanner. The LightCycler® 96 Software saves this ID to the corresponding experiment file. For detailed information, see section [Specifications of the external handheld barcode scanner](#), on page 27.

- ▶ Up to 12 LightCycler® 8-Tube Strips.

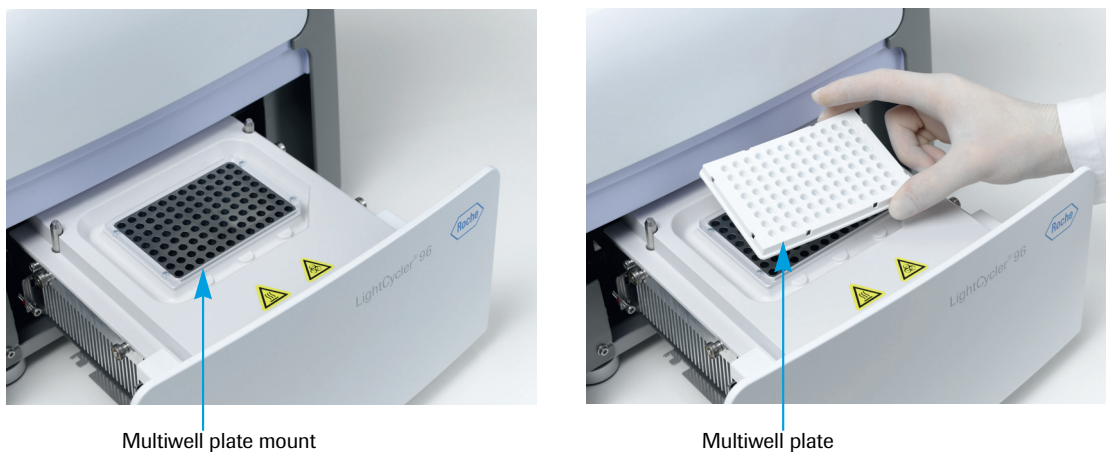

**Figure 5: Multiwell plate mount**

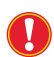

*The operator must ensure, that the multiwell plates and/or the strips are not stacked when loading the instrument.*

For the LightCycler® 8-Tube Strips the operator must ensure, that the load pattern on the mount is symmetrical. Do not use only one strip. Start with the outer columns, for example, two strips in the outer columns 1 and 12 or 2 and 11.

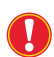

*If the mount is loaded asymmetrically, the block cycler cover is charged asymmetrically and the instrument could be damaged.*

*Additionally the operator must ensure, that the orientation of the strips on the mount matches the sample assignment in the 'Sample Editor' tab. Otherwise the analysis results are incorrectly assigned to the samples. For detailed information on assigning the samples, see section [Sample Editor tab](#), on page 143.*

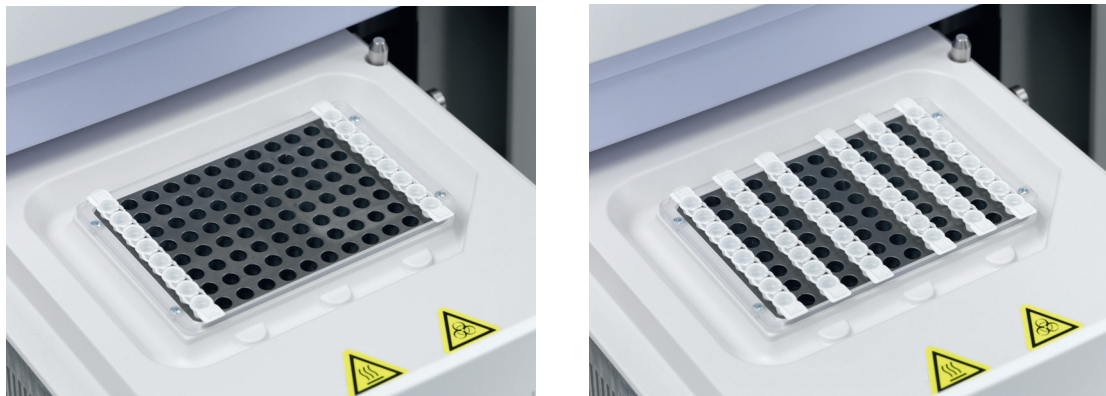

**Figure 6: Symmetrical load patterns, examples**

### 4.3 Detection unit

The detection unit consists of the following main components:

- ▶ The optic module containing 2 x 96 glass fibres for providing the excitation light and collecting the emitted light to and from each well, and one fibre for the reference channel.
- ▶ The LED light source; the LightCycler® 96 Instrument uses a white high power LED as the excitation light source. The actual wavelength used for excitation of fluorophores in the reaction is determined by the chosen excitation filter.
- ▶ The filter module containing the filter wheel with four excitation and four emission filters.
- ▶ The CCD camera for measuring the intensity of the emitted light.

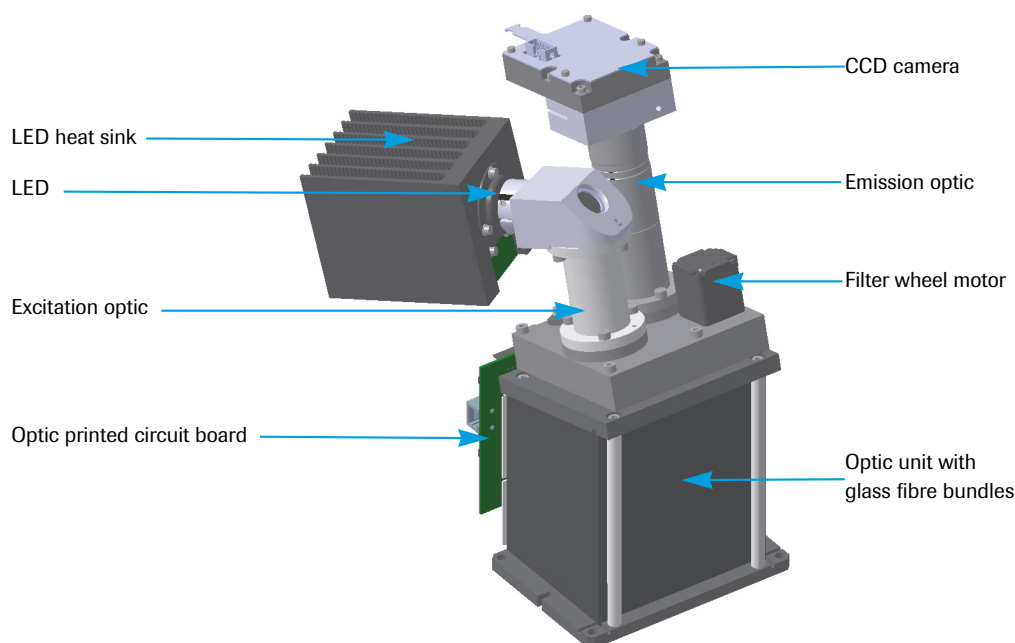

**Figure 7: Schematic detection unit overview**

#### 4.3.1 Optic module

Fiber optics provide efficient optical coupling between the excitation source, PCR, emission source, and CCD camera, enabling high sensitivity. The glass fibres in the optic module distribute the excitation light to the 96 wells of the multiwell plate and collect the emitted light.

After passing through the excitation filter, the light is projected via the glass fibres in the optic module onto the wells in the multiwell plate. In the same way, light emitted by the fluorophores is passed vertically into the optic module. This ensures that there are no shading effects within the plate wells and no distortions or variations in the signals coming from wells located at the edges of the PCR multiwell plate compared to center wells, enabling homogeneous sensitivity over the complete plate.

The fluorescent signals are then guided to the emission filter contained in the filter module and detected using the CCD camera. For detailed information, see sections [Filter module](#), on page 36 and [CCD camera](#), on page 37.

In addition an extra glass fibre measures the intensity of the LED during a run. These values are used to compensate for possible intensity fluctuation.

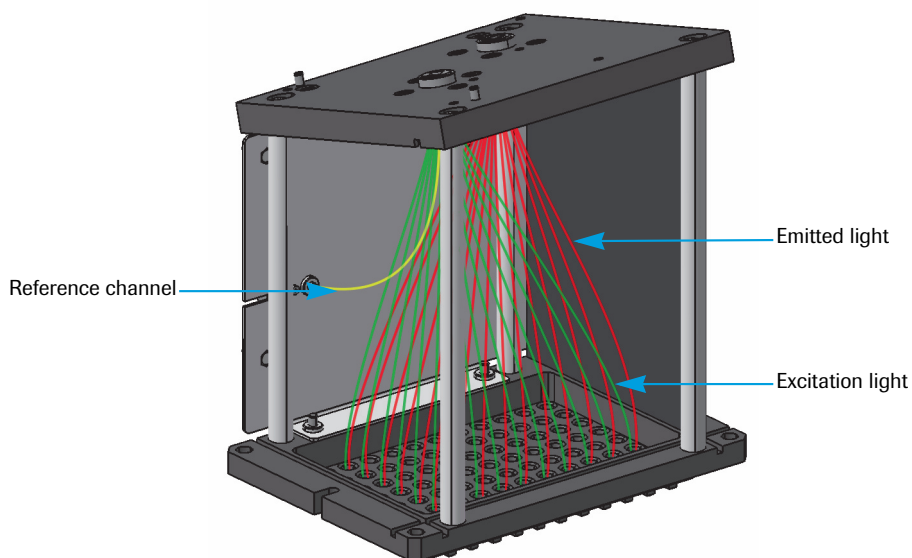

**Figure 8: Optic unit with glass fibre bundles**

#### 4.3.2 Filter module

The filter module contains a filter wheel with four excitation and four emission filters. The filters are hard-coated and do not need to be customized. The LightCycler® 96 Instrument provides four different filter combinations. The corresponding excitation and emission filters are positioned opposite on the filter wheel.

The filter wheel is driven by a stepper motor with four positions according to the filter combinations. The sensor of the filter wheel ensures that the correct filter combination is always set. For detailed information on the filter set, see section [Filter set](#), on page 26.

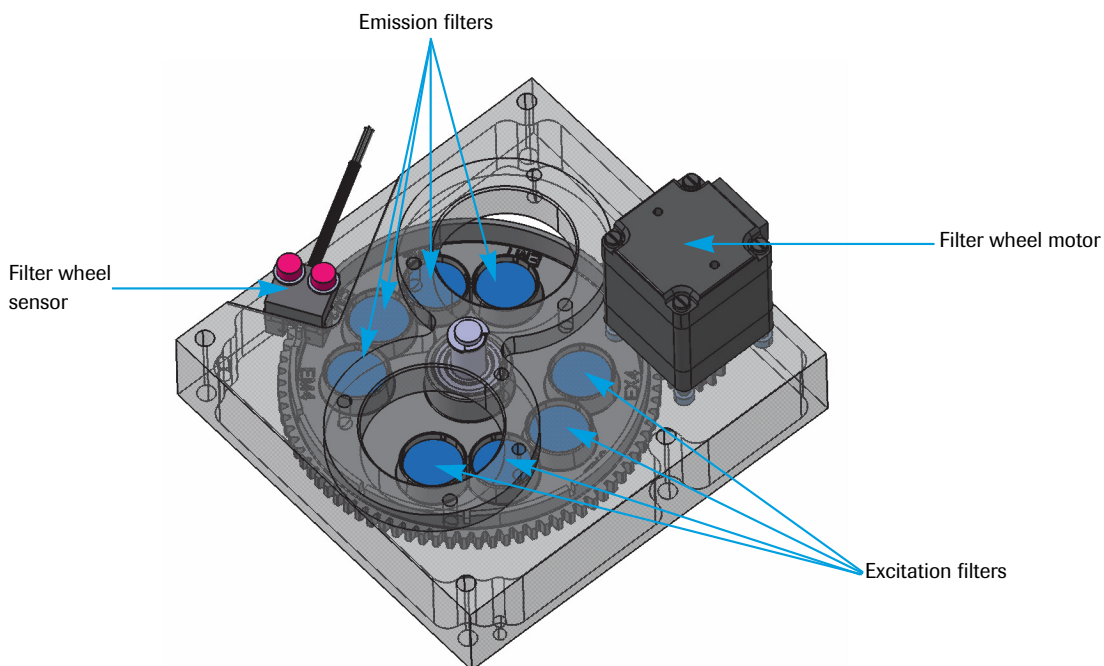

**Figure 9: Filter module with filter wheel**

### 4.3.3 CCD camera

The light-sensitive CCD camera contains a CCD chip. The acquisition time of the CCD camera is adjusted either manually or dynamically using the LightCycler® 96 Software. After measurements are transferred to the software, it performs further corrections and noise reduction.

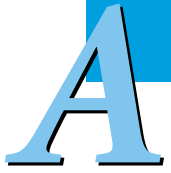

## 4.4 Detection channels

As described in section [Filter module](#), on page 36, the LightCycler® 96 Instrument provides four different combinations of excitation and emission filters to enable optimal excitation of fluorophores and exact measurement of emitted fluorescence signals. These filter combinations represent the four detection channels.

The excitation-emission filter pairs can either be used singly in mono-color applications or in successive combination for multi-color applications. For detailed information, see section [Detection formats](#), on page 64.

The table below shows the excitation-emission filter combinations of the LightCycler® 96 Instrument used in the different detection formats:

| Fluorophore                          | Excitation filter | Emission filter | Detection format                                    |
|--------------------------------------|-------------------|-----------------|-----------------------------------------------------|
| SYBR Green I<br>ResoLight Dye<br>FAM | 470               | 514             | Intercalating dye/<br>Hydrolysis probes             |
| VIC<br>HEX<br>Yellow555              | 533               | 572             | Hydrolysis probes/<br>Universal ProbeLibrary probes |
| Red610<br>Texas Red                  | 577               | 620             | Hydrolysis probes                                   |
| Cy5                                  | 645               | 697.5           | Hydrolysis probes                                   |

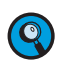

*The LightCycler® 96 Instrument can detect signals from up to four dyes, making it possible to obtain more information from a single reaction. The channels chosen for analysis depend on the fluorescent dyes used in the experiment.*

*Optimal performance is guaranteed for the dyes listed in the table above. In addition, fluorescent dyes with emission and excitation spectra almost matching the spectra of the listed dyes can also be measured using the LightCycler® 96 Instrument. If you are not sure of the suitability of a certain dye, please contact your local Roche Diagnostics representative for information.*

## 4.5 Disposables

The LightCycler® 96 Instrument requires specific disposables for operation. The LightCycler® 96 Disposables meet the demands of real-time PCR applications supported by the instrument. The following disposables are available for the LightCycler® 96 Instrument:

- ▶ LightCycler® 480 Multiwell Plate 96, white
- ▶ LightCycler® 480 Multiwell Plate 96, clear
- ▶ LightCycler® 480 Sealing Foil
- ▶ LightCycler® 8-Tube Strips (white)
- ▶ LightCycler® 8-Tube Strips (clear)

For detailed information on the LightCycler® 96 Disposables, please visit our Special Interest Site for Real-Time PCR Systems at [www.lightcycler96.com](http://www.lightcycler96.com).

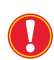

*The LightCycler® 480 Multiwell Plates and the LightCycler® 8-Tube Strips are intended for single use only. Never use a multiwell plate or tube strip more than once (even after cleaning it), as this can lead to unreliable results or incorrect integration time.*

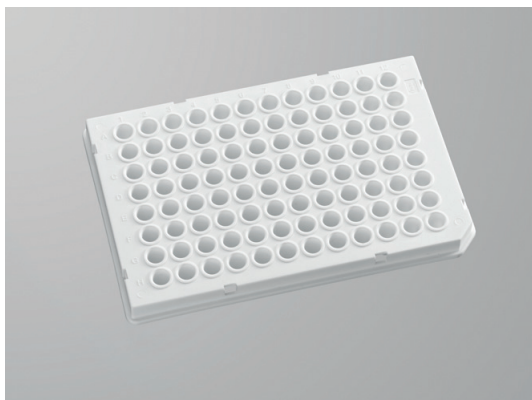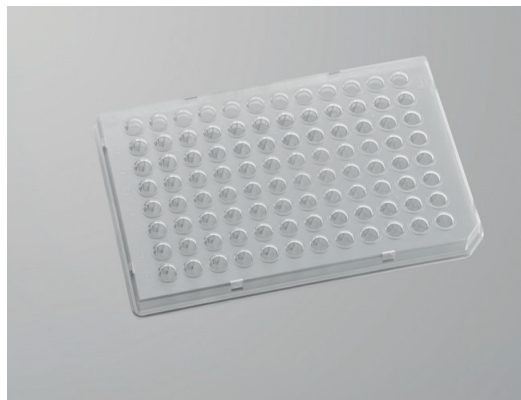

**Figure 10: LightCycler® 480 Multiwell Plate 96, white and clear**

The multiwell plates carry a barcode label on the long side at row A. This barcode label represents a running plate ID that can be read by the external handheld barcode scanner.

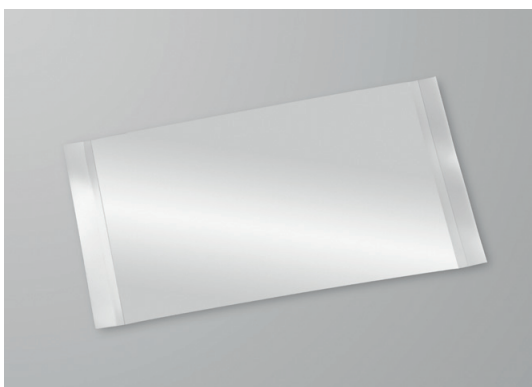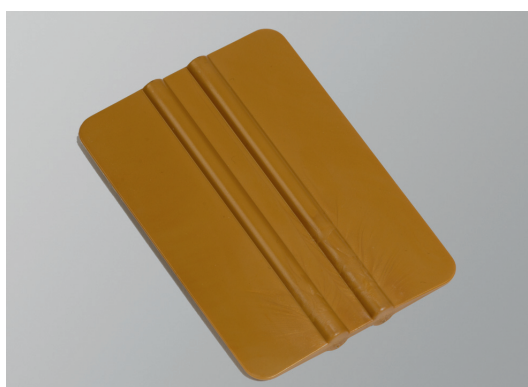

**Figure 11: LightCycler® 480 Sealing Foil and LightCycler® 480 Sealing Foil Applicator**

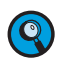

Before the multiwell plate is loaded into the LightCycler® 96 Instrument, it must be sealed with the self-adhesive sealing foil. Use the sealing foil applicator provided with the instrument for proper sealing. You can order further sealing foil applicators directly from your local Roche Diagnostics representative. Sealing the plate is crucial to eliminate evaporation at high temperatures. Use only the recommended foil.

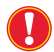

For sealing a multiwell plate, apply the sealing foil applicator several times with sufficient pressure especially for the wells at the outer edge of the plate.

Always centrifuge the filled and sealed plate before loading it into the instrument.

Always wear gloves and only handle the sealed plate by its edges. Fingerprints and other staining on the plate can affect the results.

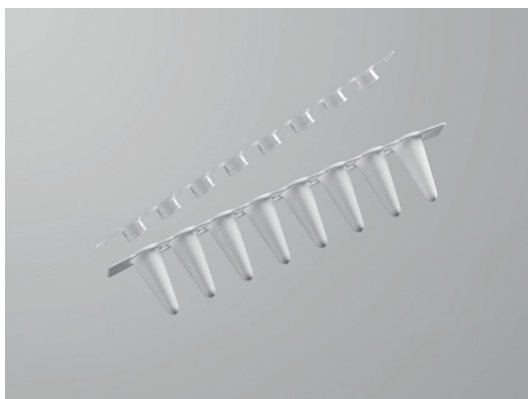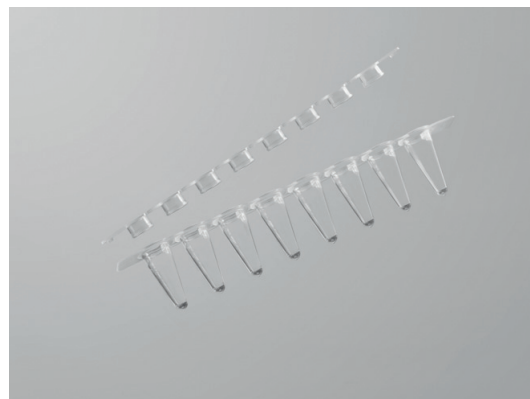

**Figure 12: LightCycler® 8-Tube Strips (white and clear)**

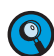

Close the tubes by firmly pressing a strip of caps into place. Make sure the tubes are closed properly, otherwise the contents could evaporate during the run.

Place the strips symmetrically on the multiwell plate mount to ensure consistent temperature distribution in the samples. For detailed information, see section [Multiwell plate mount](#), on page 34.

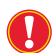

Always centrifuge the filled and capped tube strips before loading them into the instrument.

Always wear gloves and take care not to contaminate the caps. Fingerprints and other staining on the caps can affect the results.

## 4.6 Reagents

Optimal performance of the system is achieved using the LightCycler® 96 Instrument in combination with dedicated reagents. For detailed information on the LightCycler® 96 Reagents, please visit our Special Interest Site for Real-Time PCR Systems at [www.lightcycler96.com](http://www.lightcycler96.com).



## 4.7 Additional equipment

The following additional equipment is required to perform real-time PCR assays with the LightCycler® 96 System:

- ▶ Standard swing-bucket centrifuge containing a rotor for multiwell plates with suitable adapters
- ▶ Nuclease-free, aerosol-resistant pipette tips
- ▶ Pipettes with disposable, positive-displacement tips
- ▶ Sterile reaction tubes for preparing master mixes and dilutions

## 5 Installation

### 5.1 Installing the LightCycler® 96 Instrument

The LightCycler® 96 Instrument is packed in a shipping box. The box includes the LightCycler® 96 Instrument and the accessories.

- ▶ For the scope of delivery, see section [The LightCycler® 96 System Package](#), on page 28.
- ▶ For details of how to assemble the LightCycler® 96 Instrument, see section [Assembling the instrument](#), on page 44.

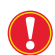

*The original shipping container must be transferred unopened to the installation site. On delivery, carefully inspect the shipping box for damage. Report any damage to your local Roche Diagnostics representative before accepting the unit.*

*Keep the shipping box and packaging in case of return.  
If you have already disposed of the packaging, you can request it from Roche.*

*Lift the LightCycler® 96 Instrument only by the sides using the recessed grips on the left and right sides of the instrument base plate.*

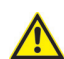

**Caution!**

*Due to the weight of the instrument, two persons may be needed to lift it.*

#### 5.1.1 Installation requirements

- ▶ The LightCycler® 96 System is for indoor use only.
- ▶ When installing a LightCycler® 96 Instrument that has been stored in a cold room or transported at low temperatures, condensation may occur, which can cause malfunction of the instrument. The instrument must be acclimated to room temperature for at least one hour prior to installation.
- ▶ Place the LightCycler® 96 Instrument on a solid, level surface in the upright position.
- ▶ Do not place the instrument in direct sunlight or close to radiators or heating devices.
- ▶ Do not place the LightCycler® 96 Instrument next to instruments that cause vibration, electromagnetic interference, or have high inductance (for example, refrigerators, centrifuges, or mixers).
- ▶ Peripheral instruments connected to the LightCycler® 96 Instrument must meet the IEC 60950 (UL 60950) standard.
- ▶ Do not place anything on top of the instrument.
- ▶ Use only the power cables and Ethernet cable supplied with the system package.
- ▶ Do not use the Ethernet cable outdoors.

### 5.1.2 Space and power requirements

Place the LightCycler® 96 Instrument in a location that can support the following instrument requirements:

|             |                                                                                                                                                                                                                                                                                                                                                                                                                                                                                                                                                                                                                                                                                                                                                                                                                                                                                                                                                                                                                                                                                                                                                                                                                                                                                                                                                                                                                                                                                                             |
|-------------|-------------------------------------------------------------------------------------------------------------------------------------------------------------------------------------------------------------------------------------------------------------------------------------------------------------------------------------------------------------------------------------------------------------------------------------------------------------------------------------------------------------------------------------------------------------------------------------------------------------------------------------------------------------------------------------------------------------------------------------------------------------------------------------------------------------------------------------------------------------------------------------------------------------------------------------------------------------------------------------------------------------------------------------------------------------------------------------------------------------------------------------------------------------------------------------------------------------------------------------------------------------------------------------------------------------------------------------------------------------------------------------------------------------------------------------------------------------------------------------------------------------|
| Dimensions  | The LightCycler® 96 Instrument is 40 cm wide, 40 cm long, and 53 cm high.                                                                                                                                                                                                                                                                                                                                                                                                                                                                                                                                                                                                                                                                                                                                                                                                                                                                                                                                                                                                                                                                                                                                                                                                                                                                                                                                                                                                                                   |
| Weight      | The LightCycler® 96 Instrument weighs approximately 27 kg.                                                                                                                                                                                                                                                                                                                                                                                                                                                                                                                                                                                                                                                                                                                                                                                                                                                                                                                                                                                                                                                                                                                                                                                                                                                                                                                                                                                                                                                  |
| Power       | <ul style="list-style-type: none"> <li>▶ The LightCycler® 96 Instrument operates at 100 to 125 V / 200 to 240 V (50/60 Hz).</li> <li>▶ The instrument can be connected to a single-phase or dual-phase supply only. The current consumption capacity of the mains power supply must not be exceeded.</li> <li>▶ There are no special provisions for protective grounding.</li> </ul> <p> <b>Caution!</b> <i>The instrument requires proper grounding. Any break in the electrical ground wire, whether inside or outside the instrument, or disconnection of the electrical ground connection, could create a hazardous condition.</i></p> <p> <b>Caution!</b> <i>Do not under any circumstances attempt to modify or deliberately override the safety features of this system.</i></p> <ul style="list-style-type: none"> <li>▶ The LightCycler® 96 Instrument uses 600 VA.</li> </ul> <p> <i>Depending on the quality of electrical grounding, an uninterruptible power supply (UPS) with line conditioner and support for "Online/Direct Mode" may be required. A UPS is not provided with the LightCycler® 96 Instrument. Roche recommends contacting a local supplier who can provide a UPS in accordance with the electrical requirements.</i></p> |
| Ventilation | <ul style="list-style-type: none"> <li>▶ Do not place anything under the instrument, such as sheets of paper, since these could block the air inlet.</li> <li>▶ Do not cover the instrument – in particular do not block the ventilation holes.</li> </ul>                                                                                                                                                                                                                                                                                                                                                                                                                                                                                                                                                                                                                                                                                                                                                                                                                                                                                                                                                                                                                                                                                                                                                                                                                                                  |
| Access      | <ul style="list-style-type: none"> <li>▶ A gap of 10 cm is recommended between the back of the instrument and the wall to allow access to the mains power switch and the Ethernet interface.</li> <li>▶ A gap of 20 cm is required on both sides to allow adequate air flow.</li> <li>▶ A gap of 5 cm is required above the instrument cover to access the USB interface.</li> </ul>                                                                                                                                                                                                                                                                                                                                                                                                                                                                                                                                                                                                                                                                                                                                                                                                                                                                                                                                                                                                                                                                                                                        |



### 5.1.3 Assembling the instrument

The LightCycler® 96 Instrument and accessories are protected in a shipping box.

To assemble the instrument:

- ▶ Unpack and install the LightCycler® 96 Instrument (see section *To unpack and install the LightCycler® 96 Instrument*, below).
- ▶ Remove the transport locking device (see section *To remove the transport locking device*, on page 49).

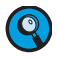

*For packing the instrument in case of a failure, see section *Packing the instrument for shipping*, on page 287.*

#### To unpack and install the LightCycler® 96 Instrument

- 1 Position the shipping box on a solid, level surface in the upright position.
- 2 Remove the plastic clamping pieces on both sides from the shipping box and open the transport packaging.

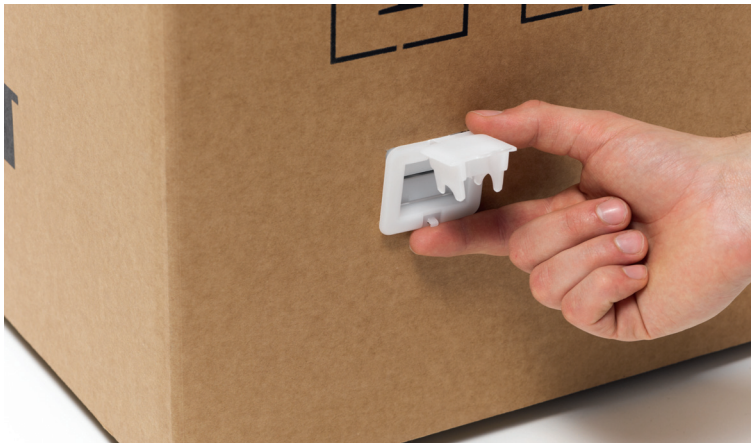

- 3 Remove the protective foam on the top and the accessory box located in front of the instrument.

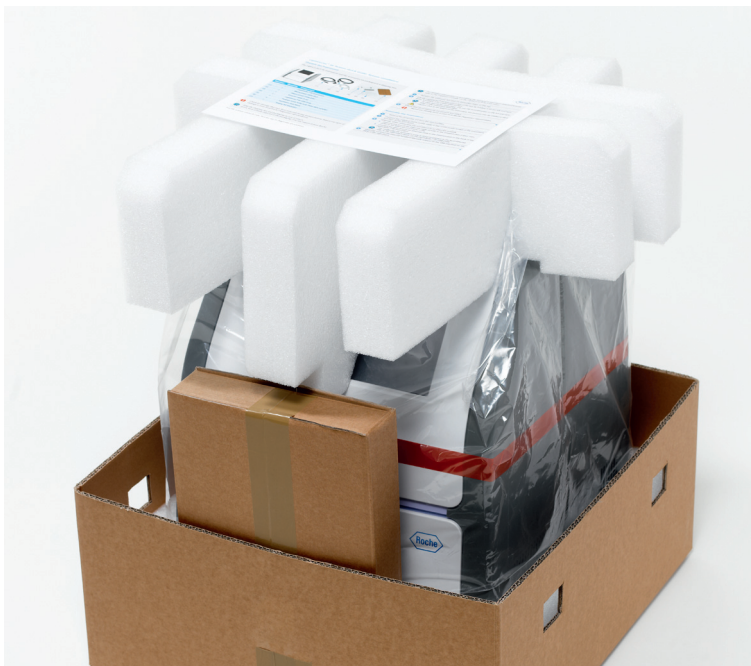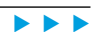

- 4 Lift the LightCycler® 96 Instrument out of the box by holding it on the left and right sides and place it on a solid level surface.

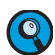

*To carry and lift the instrument, only use the recessed grips on the left and right sides of the instrument base plate.*

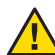

**Caution:**

*Due to the weight of the instrument, two persons may be needed to lift it.*

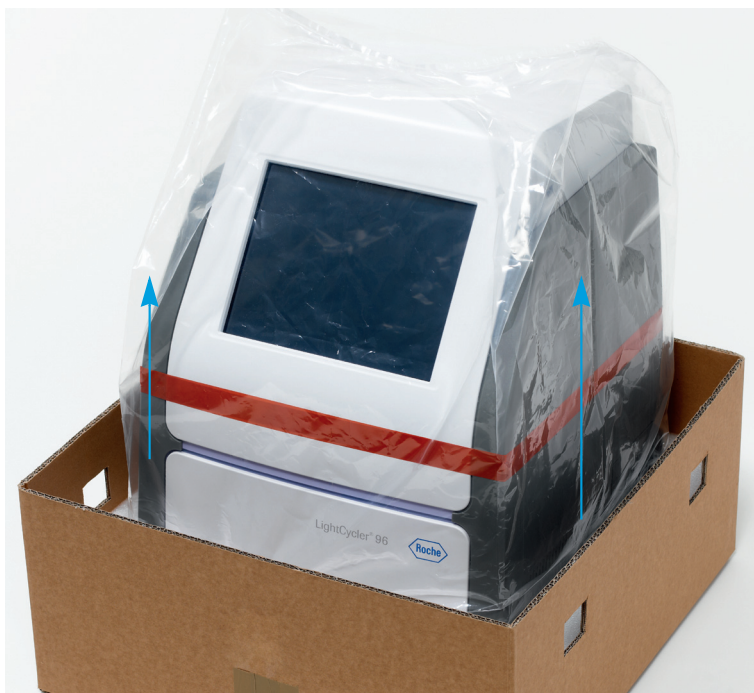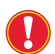

*Check for damage that may have occurred in transit. Report any signs of damage to your local Roche Diagnostics representative.*

- 5 Position the instrument on the workbench in the upright position.

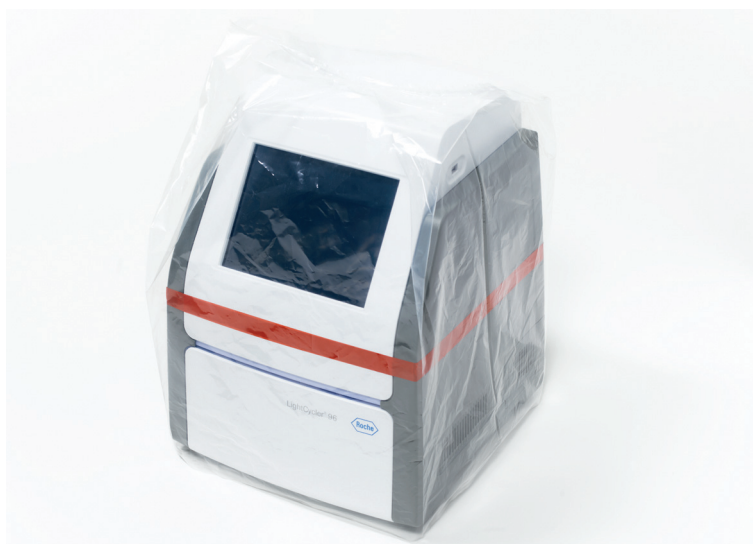

- 6 Remove the protective foil and the adhesive tape surrounding the instrument.

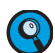

*Ensure that no residuals of the tape are visible on the instrument.*

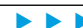

- 7** Ensure that all components are present and intact.  
For a detailed list, see section [The LightCycler® 96 System Package](#), on page 28.

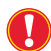

*Report any missing items to your local Roche Diagnostics representative.*

- 8** Loosen the fixation gripper on the back of the instrument. Turn the screw counterclockwise until it is completely loose.

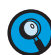

*The fixation gripper is a new device that was introduced for transport protection reasons. It is not present in older hardware versions, and it does not affect the system performance. If the gripper is not available, proceed with the next step.*

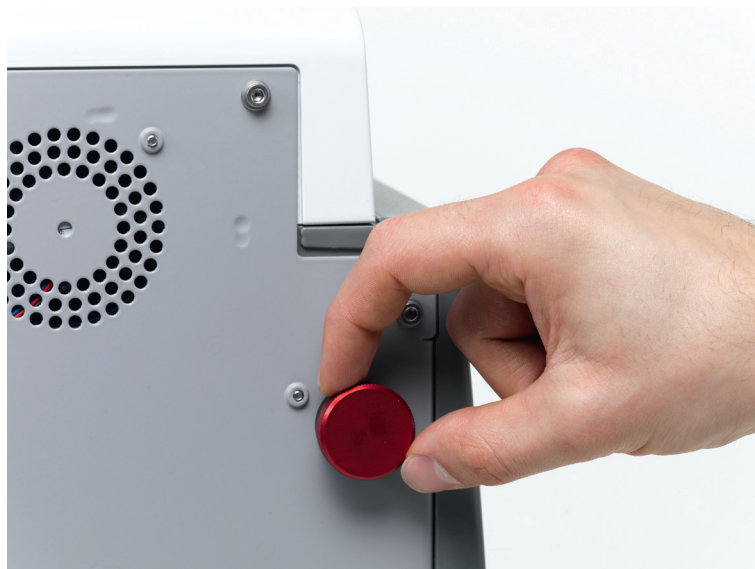

- 9** Connect the supplied mains power cable to the mains power socket of the instrument, and then to the wall outlet.

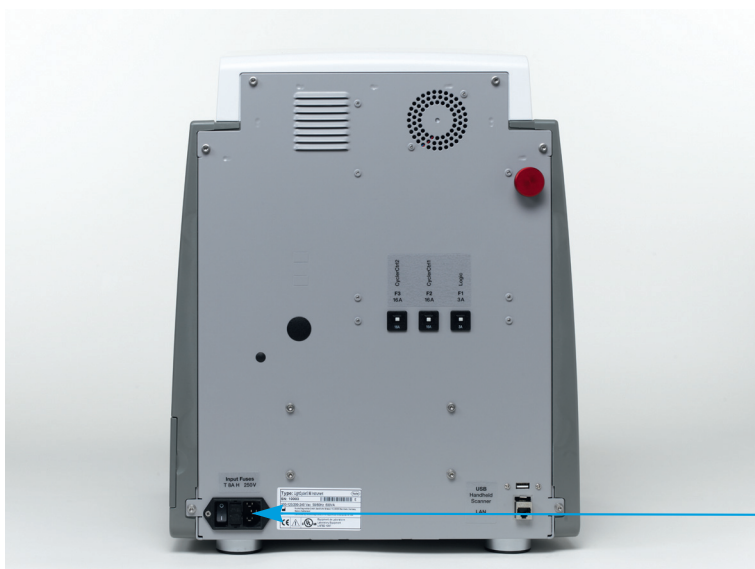

Mains power socket

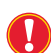

*Do not touch mains power cables when your hands are wet. Do not attempt to connect or disconnect either of the mains power cables when the instrument is switched on. If any power connector becomes worn or frayed, it must be replaced immediately with an approved cable. Always connect the equipment to a grounded wall outlet.*

- 10** Optional: Connect one end of the Ethernet cable provided with the instrument to one of the following Ethernet ports:

- ▶ The Ethernet port of your computer.
- ▶ The Ethernet port of your LAN.

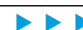

- 11 Optional: Connect the other end of the Ethernet cable to the Ethernet port on the back of the LightCycler® 96 Instrument. For network settings on the instrument see [Installing and configuring the LightCycler® 96 Instrument Software](#), on page 50.

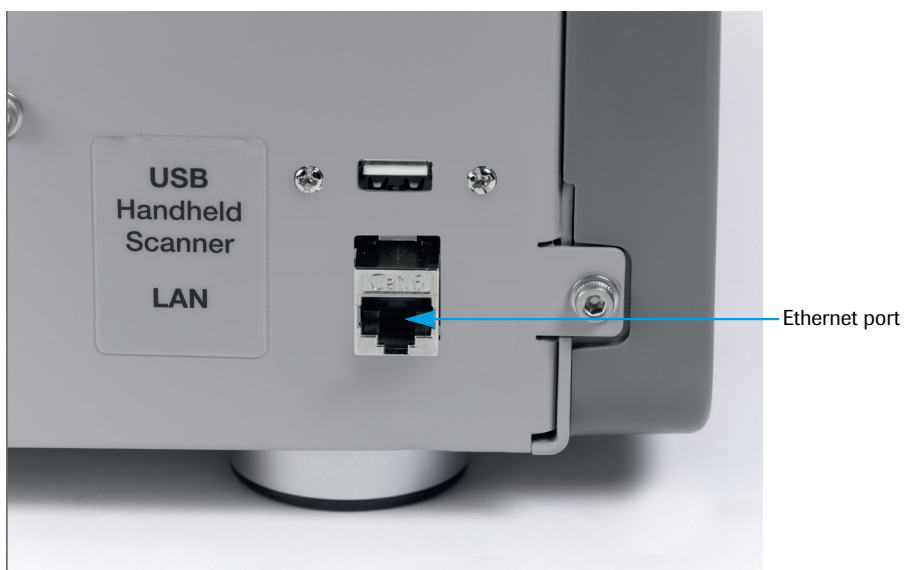

- 12 Optional: Connect the external handheld barcode scanner to the USB interface on the back of the instrument.

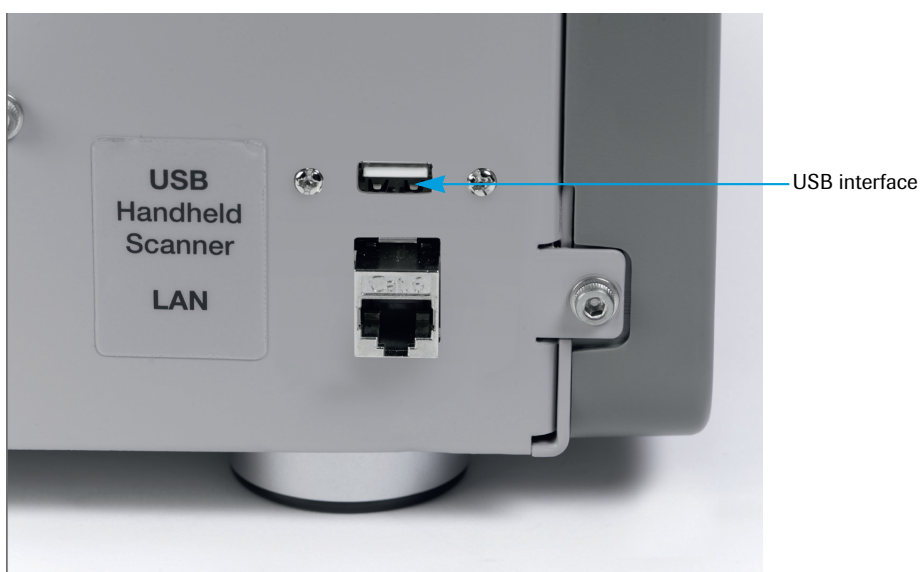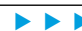

- 13** Ensure that the switches for all circuit breakers are in place, that is, all white buttons are depressed.

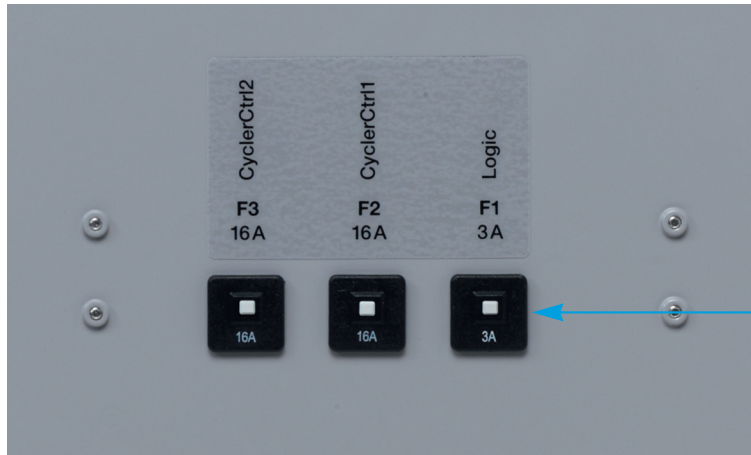

Circuit breakers

- 14** Switch on the instrument using the mains power switch on the back of the instrument.

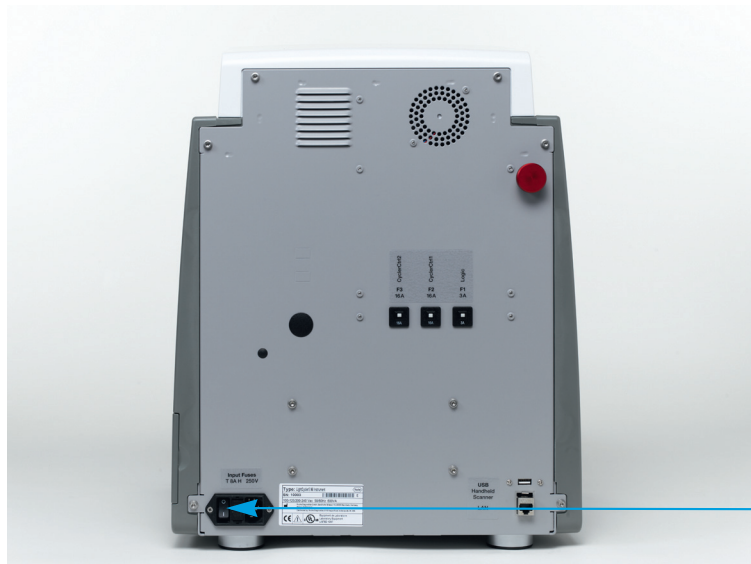

Mains power switch

## To remove the transport locking device

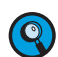

Ensure that the fixation gripper on the back of the instrument is completely loose. For detailed information on how to loosen the fixation gripper, see section [To unpack and install the LightCycler® 96 Instrument](#), on page 44.

1

Once the instrument has been successfully initialized, choose the *Eject* button on the touchscreen to release the loading module.

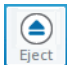

The loading module is ejected.

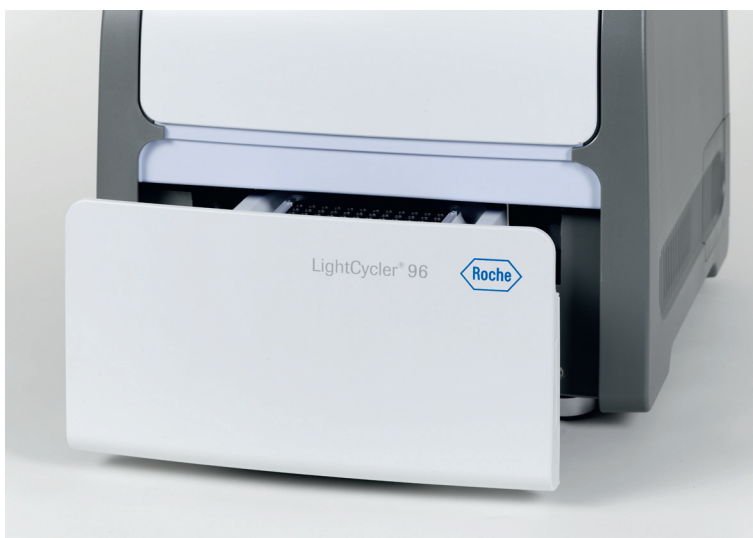

2

Manually pull the loading module completely out of the instrument.

3

Remove the transport locking device, which is held by an adhesive tape, from the mount.

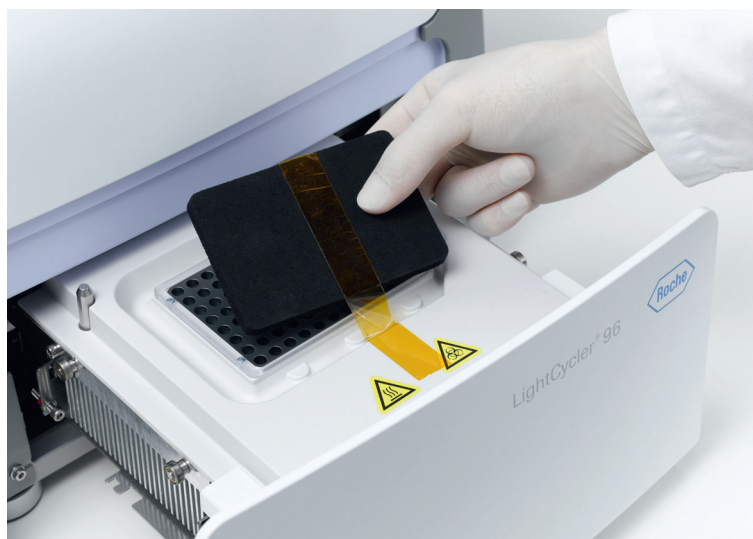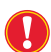

Keep the transport locking device including the adhesive tape in case the instrument has to be transported.

Ensure that no residuals of the tape are visible on the thermal block cycler or on the block cycler cover.

4

Push the loading module back until it starts moving automatically to its home position.

## 5.2 Installing and configuring the LightCycler® 96 Instrument Software

The LightCycler® 96 Instrument is controlled by the LightCycler® 96 Instrument Software. Each configuration (instrument and instrument software) works as an independent system. The LightCycler® 96 Instrument Software operates the LightCycler® 96 Instrument using the information provided by the user who defines the experiment run conditions.

- ▶ For detailed information on monitoring the instrument and defining an experiment run, see chapter [LightCycler® 96 Instrument Software](#), on page 219.
- ▶ For detailed information on handling updates of the LightCycler® 96 Instrument Software, see section [Managing updates](#), on page 60.

### 5.2.1 Installing the LightCycler® 96 Instrument Software

LightCycler® 96 Instrument Software is pre-installed on the instrument. For updating the software on the instrument, see section [Managing updates](#), on page 60.

For detailed information on upgrading the LightCycler® 96 Instrument Software Version 1.0 to the Version 1.1, see section [Upgrading the LightCycler® 96 Instrument Software Version 1.0](#), on page 62.

The LightCycler® 96 Instrument is compatible for use in a point-to-point connection over Ethernet. There are two ways of connecting the instrument:

- ▶ A one-to-one connection between the instrument and the computer, using a single cable; see sections [Configuring a one-to-one connection](#), below.
- ▶ An Ethernet network connection between the instrument and the local Ethernet network; see section [Configuring an Ethernet network connection](#), on page 55.

### 5.2.2 Configuring a one-to-one connection

For using a one-to-one connection between the LightCycler® 96 Instrument and the computer running the LightCycler® 96 Application Software, both devices must be configured.

#### Automatic one-to-one connection

When using a one-to-one connection and the *Automated* network configuration option is chosen, the instrument assigns a default IP address itself. A computer running Microsoft Windows XP or Microsoft Windows 7 as well assigns a default IP address to itself.

- 1 Connect the LightCycler® 96 Instrument to the computer, using the supplied network cable. For detailed information, see section [Assembling the instrument](#), on page 44.
- 2 Switch on the instrument and the computer.

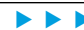

- 3 On the touchscreen, open the *Network Information* window area:  
*Utilities > Configuration > Network Information*.

The screenshot shows the 'Utilities > Configuration > Network Information' window. At the top, there are two buttons: 'Automated' (highlighted in blue) and 'Manual'. Below these are two sections: 'IP Settings' and 'Domain Name Server'. The 'IP Settings' section contains three rows: 'Network Address' (169 . 254 . 0 . 1), 'Subnet Mask' (255 . 255 . 255 . 0), and 'Gateway' (11 . 111 . 11 . 1). Each row has a blue pencil icon to its right. The 'Domain Name Server' section contains two rows: 'Preferred Server' (111 . 111 . 111 . 11) and 'Alternate Server' (111 . 111 . 111 . 11), each with a blue pencil icon to its right. At the bottom right are 'Ok' and 'Cancel' buttons.

- 4 Choose *Automated*.

This screenshot is similar to the previous one, but the 'Manual' button is now highlighted in blue, and the 'Automated' button is white. The IP and DNS settings remain the same.

The instrument assigns a default IP address to itself.

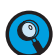

*The process for assigning an instrument IP address might take up to one minute.*

*Automatically assigned IP addresses are in the range 169.254.0.1 to 169.254.0.254. When using default Microsoft Windows XP or Microsoft Windows 7 settings, the computer automatically assigns an IP address from the same range to itself.*

- 5 Check the connection using the *Instrument Manager* in the LightCycler® 96 Application Software. For detailed information, see section [Instrument Manager](#), on page 124.
- 6 If the automatic one-to-one connection fails (for example, when the computer settings do not allow self-configuration of an IP address), configure the connection manually. For detailed information, see section [Manually configured one-to-one connection, assuming you have no administrator privileges on the computer](#), on page 54.

## Manually configured one-to-one connection, assuming you have administrator privileges on the computer

- 1 Connect the LightCycler® 96 Instrument to the computer, using the supplied network cable. For detailed information, see section [Assembling the instrument](#), on page 44.
- 2 Switch on the instrument.

### On the instrument:

- 3 On the touchscreen, open the *Network Configuration* window area:  
*Utilities > Configuration > Network Information*.
- 4 Choose *Manual*.

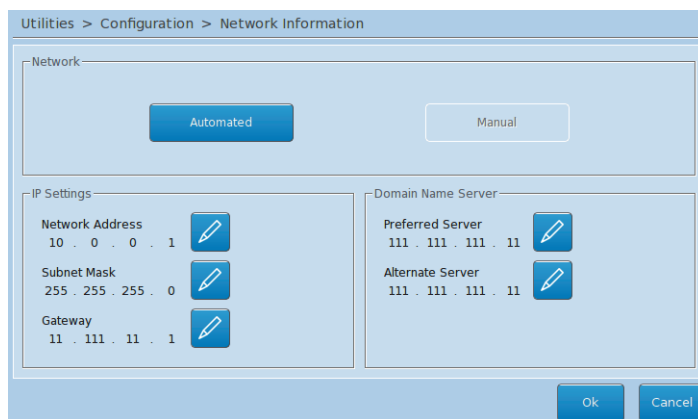

- 5 In the *Network Address* field, enter an IP address from one of the following ranges:
  - ▶ 10.0.0.1 to 10.255.255.255
  - ▶ 172.16.0.1 to 172.31.255.255
  - ▶ 192.168.0.1 to 192.168.255.255

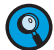

*These ranges comprise the network addresses allowed for private use.*

- 6 Write down the IP address for later use when configuring the computer.
- 7 In the *Subnet Mask* field, enter the following subnet mask:  
255.255.255.0
- 8 Choose *Ok*.

### On the computer:

- 9 Log in to Microsoft Windows and ensure that you have the administration rights to edit the network configuration.
- 10 Choose the *Start* menu and select *Control Panel*.
- 11 Choose *Network and Sharing Center*.
- 12 In the top left, choose *Change adapter settings*. The available adapters are displayed.

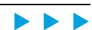

- 13 Select the adapter (LAN port) of your computer and open the *Local Area Connection Properties* dialog.

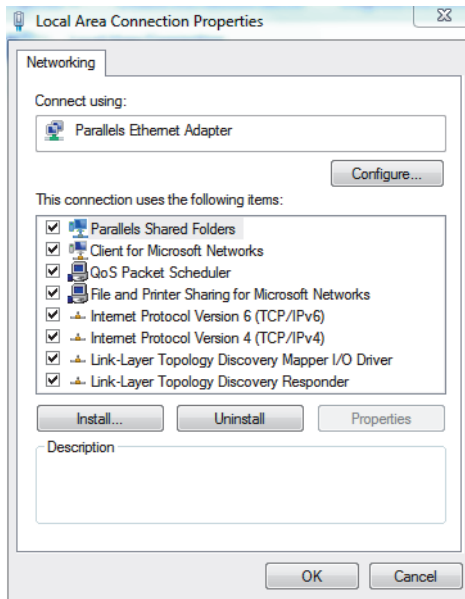

- 14 Select *Internet Protocol Version 4 (TCP/IPv4)* and choose *Properties*.

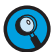

*Ensure that you have selected 'Version 4' (not 'Version 6').*

- 15 Enter an IP address for your computer:

Use the same domain value chosen for the instrument IP address, but another final value. For example, if you choose *10.0.0.1* for the instrument IP address, use *10.0.0.2* for the computer IP address.

- 16 Enter the following subnet mask:

255.255.255.0

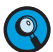

*This subnet mask is identical to the instrument subnet mask.*

- 17 Choose *OK*.

- 18 Check the connection using the *Instrument Manager* in the LightCycler® 96 Application Software. For detailed information, see section *Instrument Manager*, on page 124.

## Manually configured one-to-one connection, assuming you have no administrator privileges on the computer

When a computer is used in a stand-alone mode, Microsoft Windows automatically assigns an IP address to the computer. To identify this IP address and to connect the LightCycler® 96 Instrument, follow the steps below.

- 1 Connect the LightCycler® 96 Instrument to the computer, using the supplied network cable. For detailed information, see section [Assembling the instrument](#), on page 44.
- 2 Switch on the instrument.

### On the computer:

- 3 Log in to Microsoft Windows.
- 4 Open the command prompt.
- 5 Type *ipconfig* and press the [Enter] key.
- 6 Write down the *Autoconfiguration IPv4 Address* and the *Subnet Mask* for later use when configuring the instrument.

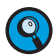

*If the 'ipconfig' command provides more than one connection, choose one connection for later use, for example, 'Ethernet-Adapter Local Area connection 1'. It is recommended to use the first connection in the list.*

### On the instrument:

- 7 On the touchscreen, open the *Network Configuration* window area: *Utilities > Configuration > Network Information*.
- 8 Choose *Manual*.

- 9 In the *Network Address* field, enter the IP address from step 6, but increase the last digit by a value of 1.
- 10 In the *Subnet Mask* field, enter the same subnet mask as indicated on the computer (step 6).
- 11 Choose *Ok*.

### On the computer:

- 12 Check the connection using the *Instrument Manager* in the LightCycler® 96 Application Software. For detailed information, see section [Instrument Manager](#), on page 124.

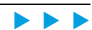

- 13** If the connection fails:  
 Open the command prompt and enter the *ping* command:  
 Type *ping <instrument\_IP\_address>* and press the [Enter] key.

```
C:\users\test1>ping 10.0.0.1

Pinging 10.0.0.1 with 32 bytes of data:
Reply from 10.0.0.1: bytes=32 time<1ms TTL=128
Reply from 10.0.0.1: bytes=32 time<1ms TTL=128
Reply from 10.0.0.1: bytes=32 time<1ms TTL=128
Reply from 192.168.0.184: bytes=32 time<1ms TTL=128

Ping statistics for 10.0.0.1:
    Packets: Sent = 4, Received = 4, Lost = 0 (0% loss),
    Approximate round trip times in milli-seconds:
        Minimum = 0ms, Maximum = 0ms, Average = 0ms
```

- ▶ If the ping is replied by the instrument, probably the firewall of your computer blocks the application software. In this case contact your local IT administrator for support.
- ▶ If the ping is not replied by the instrument, check whether the IP address on the instrument is correct.

### 5.2.3 Configuring an Ethernet network connection

For connecting the LightCycler® 96 Instrument to the local Ethernet network, the operator has the following options:

- ▶ Using a standard network, where the TCP/IP addresses are assigned automatically by a Dynamic Host Configuration Protocol (DHCP) server.
- ▶ Assigning the IP addresses manually.

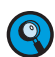

*A standard network is the type of network you are likely to have if you do not need to configure the IP address of your computer manually.*

- 1** Connect the LightCycler® 96 Instrument to the network in the same way as a computer, using the supplied network cable to connect to a wall socket or a network switch/hub. For detailed information, see section [Assembling the instrument](#), on page 44.
- 2** Switch on the instrument.

#### On the instrument:

- 3** On the touchscreen, open the *Network Configuration* window area:  
*Utilities > Configuration > Network Information.*
- 4** Choose one of the following options:
  - ▶ *Automated:*  
 The IP address is searched for automatically. The IP address, subnet mask, default gateway address, and the DNS addresses are displayed in the corresponding fields. Proceed with step 7.
  - ▶ *Manual:*  
 Contact your local IT administrator for the IP address. Proceed with step 5.

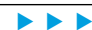

- 5 In the *Network Address* field, enter the IP address provided by your local IT administrator.

- 6 In the *Subnet Mask* field, enter the following subnet mask:  
255.255.255.0
- 7 Write down the IP address.
- 8 Choose *Ok*.

#### On the computer:

- 1 Register the instrument with the LightCycler® 96 Application Software using the instrument IP address or the host name. For detailed information, see section [Instrument Manager](#), on page 124.

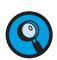

*If the connection to the instrument fails, even though you have connected all cables properly and configured the connection correctly, restart the instrument.*

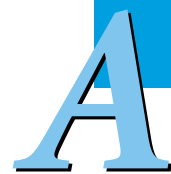

### 5.3 Installing the LightCycler® 96 Application Software

The LightCycler® 96 Application Software is installed on a computer which can be connected to the LightCycler® 96 Instrument either via a standard network or directly, as well as on a computer that is not connected to a LightCycler® 96 Instrument.

- ▶ For detailed information on connecting to a LightCycler® 96 Instrument, see section [To register an instrument](#), on page 126.
- ▶ For detailed information on defining an experiment run and on analyzing the results, see chapter [LightCycler® 96 Application Software](#), on page 85.
- ▶ For detailed information on handling updates of the LightCycler® 96 Application Software, see section [Managing updates](#), on page 60.

#### 5.3.1 System requirements

To install and run the LightCycler® 96 Application Software, the computer must satisfy the following minimum requirements:

- ▶ Processor: Intel Core 2 duo 2.4 GHz
- ▶ Memory: 2 GB
- ▶ Hard disk: 250 GB
- ▶ LAN: RJ45 Ethernet (100 MBit)
- ▶ USB: USB 2.0
- ▶ Display resolution: 1280 \* 1024
- ▶ Operating system: Microsoft Windows XP or Microsoft Windows 7, 32bit configuration
- ▶ Microsoft .NET Framework 4.0 installed
- ▶ Setting for regional and language options: English (USA)

#### 5.3.2 Installing the LightCycler® 96 Application Software

The LightCycler® 96 Application Software is provided on the separate USB drive which is part of the system package. The software is installed via a standard installation program. Software updates are provided via the download area of the [Roche Applied Science](#) website. For detailed information on handling updates, see section [Managing updates](#), on page 60.

#### To install the LightCycler® 96 Application Software

- 1 Start the computer on which you want to install the software.  
 For installing the LightCycler® 96 Application Software Version 1.1 as an upgrade to the LightCycler® 96 Application Software Version 1.0, proceed as follows:
  - ▶ Download the new software release from the download area of the [Roche Applied Science](#) website.
  - ▶ Unpack the \*.zip archive.
  - ▶ Proceed with step 5.
- 2 Insert the USB drive.
- 3 Log in to Microsoft Windows, and ensure that you have the administration rights to install the software.
- 4 Open Windows Explorer and navigate to the USB drive.

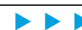

- A**
- 5 Double-click the *Setup\_LightCycler96\_<release>.exe* file.  
The installation process transfers the files, extracts the files, and prepares the installation wizard. The *Welcome to the LightCycler® 96 Setup Wizard* dialog box opens.  
Choose *Next*.
  - 6 You are prompted to agree to the license conditions:
    - ▶ Read the license agreement.
    - ▶ Check the *I agree* option.
    - ▶ Choose *Next* to proceed.
  - 7 In the *Select Installation Folder* dialog box:
    - ▶ Select the location for the LightCycler® 96 Application Software:  
Either keep the default settings or browse to select a location for the installation.  
 *By default, the software is installed in the 'C:\Program Files\Roche Diagnostics\LightCycler® 96' directory.*
    - ▶ Choose whether the software is to be accessed only by yourself or by anyone on the computer.
  - 8 In the *Confirm Installation* dialog box, choose *Next*.
  - 9 The selected components are installed. When the installation process has finished, the *Installation Complete* dialog box opens.  
Choose *Close*.

### 5.3.3 The LightCycler® 96 Application Software home directory

The LightCycler® 96 Application Software is installed in the home directory you specified during the installation process. By default, the home directory is created under:  
*C:\Program Files\Roche Diagnostics\LightCycler® 96*.

When the installation is complete, the home directory contains the following directories:

| Directory        | Description                                                                                                |
|------------------|------------------------------------------------------------------------------------------------------------|
| <i>bin</i>       | Program libraries, configuration files, and executable files for the LightCycler® 96 Software application. |
| <i>DemoData</i>  | Demo experiment files delivered with the software.                                                         |
| <i>Manuals</i>   | LightCycler® 96 System Guides.                                                                             |
| <i>Templates</i> | Non-executed experiments with run settings to be used as templates.                                        |

### 5.3.4 Uninstalling the LightCycler® 96 Application Software

- 1 Start the computer with the LightCycler® 96 Application Software.
- 2 Log in to Windows and ensure that you have the administration rights to uninstall the software.
- 3 In the *Start* menu, navigate to the *LightCycler® 96* folder and choose the *Uninstall LightCycler® 96* entry.
- 4 You are prompted to confirm that you want to uninstall the application.  
Choose *Yes*.
- 5 During the installation, the directories *bin*, *Manuals*, and *Templates* are deleted.  
When the process is finished, a message states that the software has been completely removed from your computer.  
Choose *OK*.

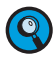

*Alternatively, you can use the Microsoft Windows Control Panel to uninstall the LightCycler® 96 Application Software.*



## 5.4 Managing updates

New software releases and user guides for the LightCycler® 96 Instrument are available in the download area of the [Roche Applied Science](#) website. New user guides are also available on the [Roche Technical Support](#) website.

During an upgrade, all settings of the prior software version are adopted so no configuration is required.

### 5.4.1 Installing a LightCycler® 96 Application Software update

When installing an update of the LightCycler® 96 Application Software, there is no need to uninstall the existing version. Administrators can install the software update on the computer, as described in section [Installing the LightCycler® 96 Application Software](#), on page 57.

### 5.4.2 Installing a LightCycler® 96 Instrument Software update

When installing an update of the LightCycler® 96 Instrument Software, there is no need to uninstall the existing version.

#### To install a LightCycler® 96 Instrument Software update

- 1 Download the new software release from the download area of the [Roche Applied Science](#) website and save it to a USB drive.

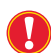

*The installation file must be located on the top level of the USB drive.*

- 2 Start the LightCycler® 96 Instrument and wait for the *Ready* status to be displayed.

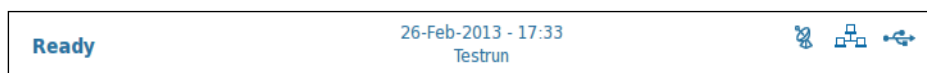

- 3 Insert the USB drive into the USB interface on the right side of the instrument.

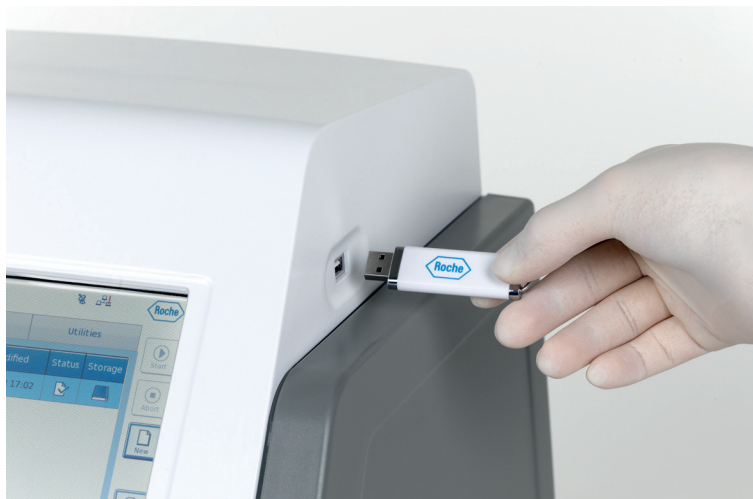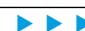

- 4 On the touchscreen, open the *Utilities* and then the *Instrument* tab.

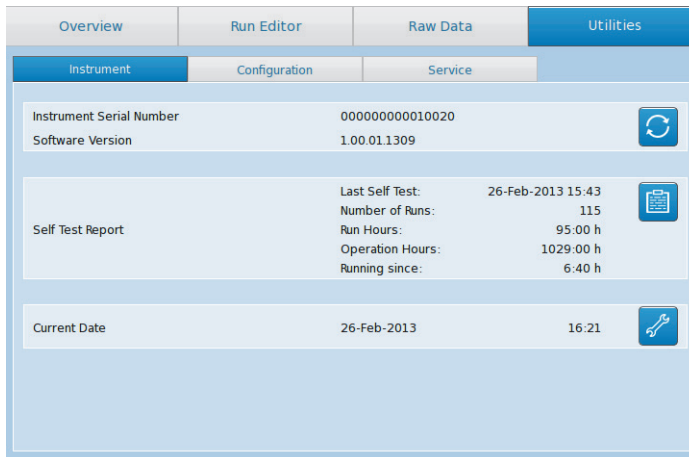

- 5 Choose the update button next to the *Software Version* field. The *Software Update* window area opens. The window area displays the software version available on the USB drive.

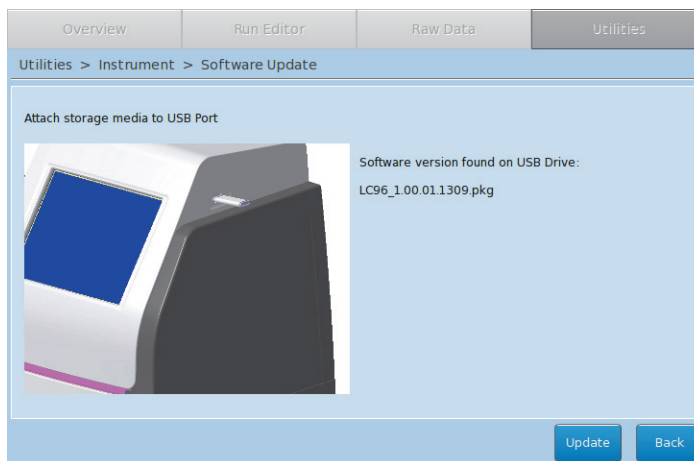

- 6 Select the corresponding software version.

- 7 Choose *Update*.

The file is copied from the USB drive to the instrument.

After installation, the system must be rebooted. The software displays the following dialog box:

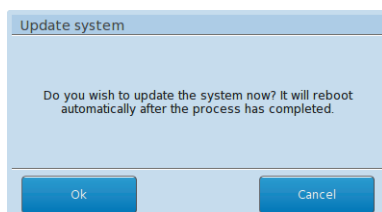

- 8 Choose *OK*.

The instrument automatically shuts down and restarts. The instrument is then ready for further use.

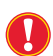

*Do not remove the USB drive during the update process.*

### 5.4.3 Upgrading the LightCycler® 96 Instrument Software Version 1.0

For installing the LightCycler® 96 Instrument Software Version 1.1 as an upgrade to the LightCycler® 96 Instrument Software Version 1.0, please note the following issues:

#### Compatibility with the application software

The LightCycler® 96 Instrument Software cannot cooperate with a different version of the LightCycler® 96 Application Software and vice versa. When different software versions are installed, it is not possible to register an instrument with the application software, using the *Instrument Manager* tool. Operators must update both, the LightCycler® 96 Instrument Software and the LightCycler® 96 Application Software to the Version V1.1.

For detailed information on upgrading the software, see the following sections:

- ▶ [Installing the LightCycler® 96 Application Software](#), on page 57.
- ▶ [Installing a LightCycler® 96 Instrument Software update](#), on page 60.

#### .lc96 files

When installing the LightCycler® 96 Instrument Software Version 1.1, no experiment files generated with the LightCycler® 96 Software Version 1.0 are allowed on the instrument. Operators must save and then remove these files from the instrument before the installation. The following procedure is recommended:

- 1 For saving the experiments, perform one of the following steps:
  - ▶ On the instrument, synchronize the experiments with the connected USB drive using the *Synchronize* button. The experiments are transferred to the USB drive. For detailed information, see section [Overview tab](#), on page 237.
  - ▶ On your computer, retrieve the experiments from the instrument using the *Instrument Manager* tool in the application software. For detailed information, see section [Send/Receive Experiments tab](#), on page 128.
- 2 Remove the experiments from the instrument using the *Delete* button. For detailed information, see section [Overview tab](#), on page 237.
- 3 Optional: Backup the instrument configuration to a connected USB drive. For detailed information, see section [Backup/Restore/Reset](#), on page 267.
- 4 Install the LightCycler® 96 Instrument Software Version 1.1. For detailed information, see section [Installing a LightCycler® 96 Instrument Software update](#), on page 60.



## Experiment file types

By default, all new experiment files, generated with the LightCycler® 96 Instrument Software or LightCycler® 96 Application Software Version 1.1 have the file types \*.lc96p or \*.lc96u:

- ▶ \*.lc96p for processed experiments.
- ▶ \*.lc96u for unprocessed experiments.

Experiments generated with the LightCycler® 96 Software Version 1.0 have the file type \*.lc96. All three file types can be opened in the LightCycler® 96 Application Software. In the LightCycler® 96 Instrument Software Version 1.1 however, only the file types \*.lc96p or \*.lc96u are supported. For opening an \*.lc96 file, operators must save it as a \*.lc96p or \*.lc96u file using the application software. The following procedure is recommended:

- 1 Open the \*.lc96 file in the LightCycler® 96 Application Software.
- 2 Save the file as \*.lc96u or \*.lc96p file depending on the processing status. For detailed information, see section [Saving an experiment](#), on page 116.  
 *The data in the experiment file remain unchanged.  
The \*.lc96 file is also retained.*
- 3 Transfer the \*.lc96u or \*.lc96p file to the instrument.

### 5.4.4 Installing a firmware update

In some cases, the software will include improvements for the LightCycler® 96 Instrument, which will require the instrument to be updated. New software releases for the firmware will be delivered together with the LightCycler® 96 Instrument Software and are automatically installed when the instrument software is updated. For detailed information, see section [Installing a LightCycler® 96 Instrument Software update](#), on page 60.

## 6 Detection formats

The LightCycler® 96 Instrument makes use of fluorescent dyes for online, real-time monitoring of both the generation of PCR products during cycling and the melting of PCR products. Fluorescence signals measured during cycling are correlated with the amount of PCR product in the reaction, allowing calculation of the input copy number of the target nucleic acid (possible both with sequence-specific and sequence-independent detection formats). With sequence-independent detection formats, fluorescence measurements are also used for PCR product characterization by melting curve analysis. For maximum flexibility, the LightCycler® 96 Instrument supports several fluorescent detection formats and can be used with a broad range of probes and dyes:

▶ **Sequence-Specific Probe Binding Assays.**

Rely on fluorophores coupled to sequence-specific oligonucleotide probes that hybridize to their complementary sequence in target PCR products, for example:

- ▶ Hydrolysis probes (5'-nuclease assay).
- ▶ Universal ProbeLibrary probes (5'-nuclease assay).

▶ **Sequence-Independent Detection Assays using double-stranded DNA-binding dyes.**

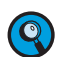

*Optimal performance of the system is achieved using the LightCycler® 96 Instrument in combination with dedicated reagents. For detailed information on the LightCycler® 96 Reagents, please visit our Special Interest Site for Real-Time PCR Systems at [www.lightcycler96.com](http://www.lightcycler96.com).*

*Optimal performance is guaranteed for the dyes listed in the table listed in section [Detection channels](#), on page 38. In addition, fluorescent dyes with emission and excitation spectra almost matching the spectra of the listed dyes can also be measured using the LightCycler® 96 Instrument. If you are not sure of the suitability of a certain dye, please contact your local Roche Diagnostics representative for information.*

## 6.1 Monitoring PCR with an intercalating fluorescent dye

Generation of PCR products is detected by measuring the increase in the dye fluorescence (measured at 510 nm). In solution, unbound dye exhibits very little fluorescence. However, fluorescence is greatly enhanced after dye intercalation into the helix of dsDNA. During PCR, the increase in fluorescence is proportional to the amount of newly generated dsDNA.

The following are the basic steps of DNA detection using intercalating dyes such as SYBR Green I during real-time PCR on the LightCycler® 96 System:

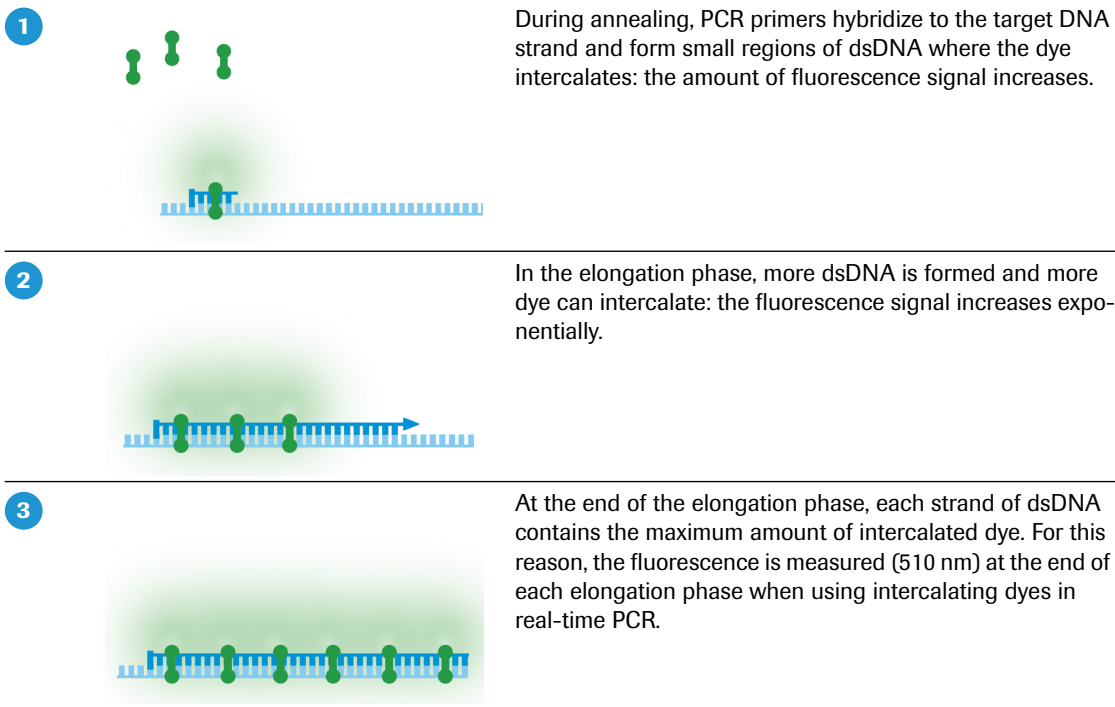

Since the dye binds all dsDNA, regardless of the DNA sequence, it cannot discriminate between specific PCR products, primer-dimers and other nonspecific products. Any double-stranded PCR artifact will contribute to signal increase, which could result in overestimation of the concentration of the target sequence.

To determine whether only the desired PCR product has been amplified, a melting curve analysis should be performed directly after PCR. PCR product characterization by melting curve analysis is based on the fact that each particular dsDNA sequence has its characteristic melting point (the temperature at which 50% of the DNA is double-stranded and 50% is melted, and becomes single-stranded). The most important factors that determine the thermal stability of dsDNA are length in base pairs and GC content of the sequence.

During a melting experiment, the reaction mixture is slowly heated up, for example, from +60°C to +95°C. When the temperature reaches the melting point of a PCR product present in the reaction, the DNA strands separate and the fluorescence of the released dye decreases sharply.

The LightCycler® 96 Instrument continuously monitors the fluorescence over the temperature transition. In the LightCycler® 96 Software, these data are displayed as a melting peaks chart (first negative derivative of fluorescence [F] vs. temperature [T]), where the temperature of the melting peak maximum corresponds to the point of inflection in the melting curve that defines the melting point of the specific dsDNA fragment.

**A** If the real-time PCR produces only one specific DNA amplicon, the melting curve analysis will show only one melting peak. If primer-dimers or other nonspecific products are present, they will be shown as additional melting peaks. Checking the melting temperature of a PCR product is thus used to confirm the specificity of the PCR product.

## 6.2 Monitoring PCR with hydrolysis probes

Hydrolysis probe assays can technically be described as homogeneous 5'-nuclease assays, since a single 3'-nonextendable probe, which is cleaved during PCR amplification, is used to detect the accumulation of a specific target DNA sequence. This single probe contains two labels, a fluorescent reporter and a quencher, in close proximity to each other. When the probe is intact, the quencher dye is close enough to the reporter dye to suppress the reporter fluorescent signal. Fluorescence quenching takes place via Fluorescence Resonance Energy Transfer (FRET).

During PCR, the 5'-nuclease activity of the polymerase cleaves the hydrolysis probe, separating reporter and quencher. After cleavage, the reporter is no longer quenched and emits a fluorescence signal when excited. The LightCycler® 96 Instrument can detect hydrolysis probes that are labeled with 4 classes of reporter dyes:

- ▶ Class 1: FAM
- ▶ Class 2: VIC, Hex or Yellow555
- ▶ Class 3: Red610 or Texas Red
- ▶ Class 4: Cy5

Hydrolysis probes can be used separately or in combination, which permits either single-color or multi-color detection.

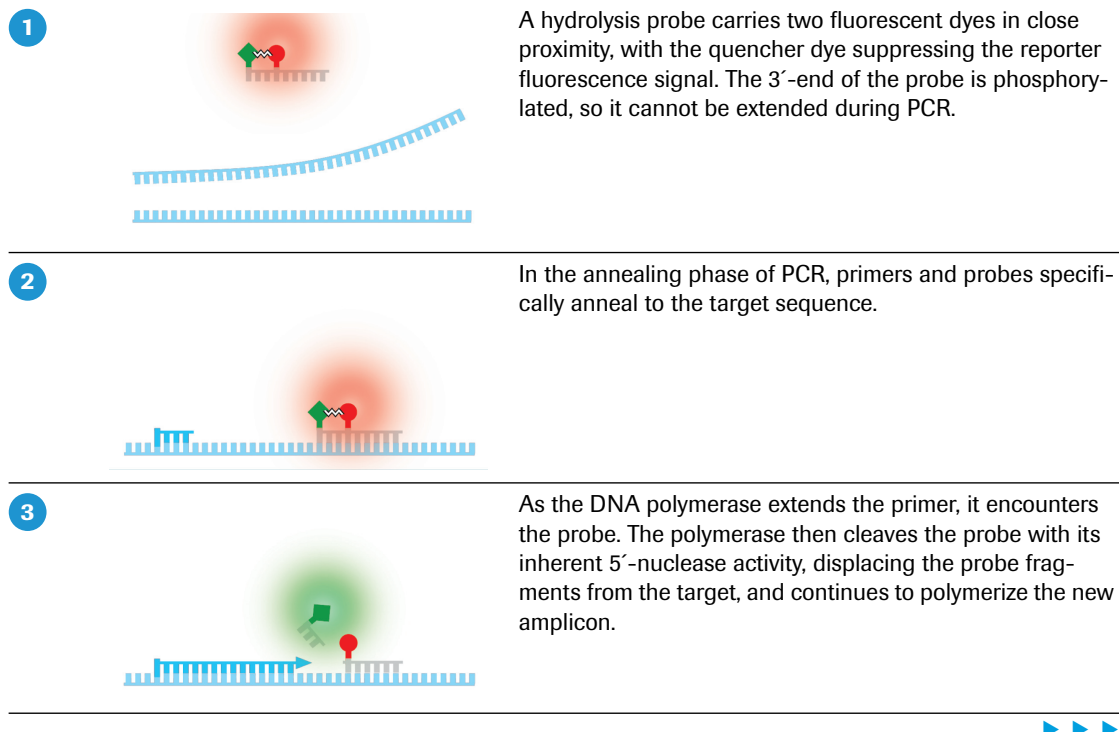

4

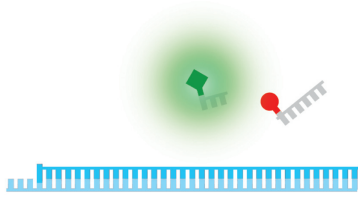

In the cleaved probe, the reporter dye is no longer quenched and therefore can emit fluorescence that can be measured in the appropriate detector channel of the LightCycler® 96 Instrument. The increase in fluorescence from the reporter dye correlates to the accumulation of released reporter dye molecules (and thus indirectly to the amount of PCR products). The fluorescence signal of the reporter dye is measured at the end of the elongation phase.

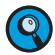

*In the hydrolysis probe format, PCR products cannot be characterized by melting curve analysis, because the generation of fluorescence signals does not depend on the hybridization status but on irreversible digestion of the probe.*

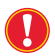

*For a 5'-nuclease digestible hybridization complex to form correctly, the melting temperature of the probe should be higher than the melting temperature of the PCR primer.*

## 7 Analysis principles

The LightCycler® 96 Application Software provides different analyses modules for a PCR experiment:

- ▶ Absolute quantification; see section [Absolute quantification analysis](#), on page 71.
- ▶ Relative quantification; see section [Relative quantification analysis](#), on page 72.
- ▶ Qualitative detection; see section [Qualitative detection analysis](#), on page 77.
- ▶ Endpoint genotyping; see section [Endpoint genotyping analysis](#), on page 78.
- ▶  $T_m$  calling; see section  [\$T\_m\$  calling analysis](#), on page 79.
- ▶ High resolution melting; see section [High resolution melting analysis](#), on page 81.

### Color compensation

To correct the fluorescence crosstalk, color compensation is applied automatically before data analysis. The LightCycler® 96 Application Software automatically reassigns the fluorescence in each channel to the appropriate dye. This results in the detection of only one dye in each channel.

For multi-color experiments, color compensation is performed automatically for all analysis modules. When measuring a typical multi-color amplification data set, all amplification curves detected in heterologous channels are called *Negative* by the automatic positive/negative algorithm. For detailed information on the algorithm, see section [Positive/negative filter](#), on page 69.

### 7.1 Quantification analysis

A quantification analysis can be performed on any experiment in which a nucleic acid is:

- ▶ Amplified using a cycling program and
- ▶ Detected via fluorescent signals that originate from DNA-binding generic dyes or sequence-specific probes.

Taking advantage of real-time, online monitoring of PCR, the software considers fluorescence values measured in the exponentially growing log-linear phase of the PCR amplification process for analysis of the quantification data.

A typical quantification experiment performed on the LightCycler® 96 Instrument is shown in the figure below. The reaction profile contains three phases: the initial background phase, an exponential (log-linear) growth phase, and a final plateau phase. The initial phase lasts until the fluorescence signal from the PCR product is greater than the background fluorescence. The exponential log phase begins when sufficient product has accumulated to be detected above the background and ends when the reaction efficiency falls as the reaction enters the plateau.

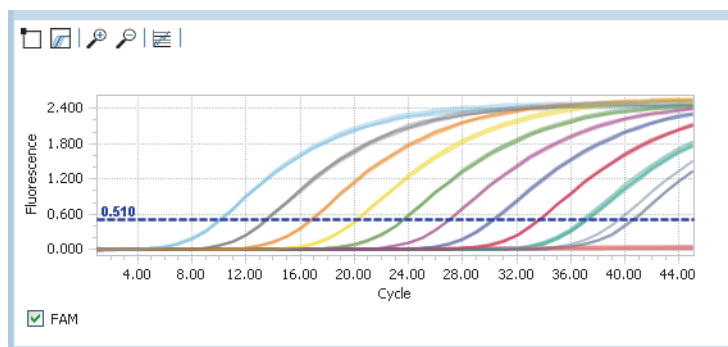

**Figure 13: Typical quantification experiment**

A perfect amplification reaction with an efficiency of 2 (that is, every PCR product is replicated once in every cycle) can be described during the log-linear phase by  $T_n = T_0 \times 2^n$ .

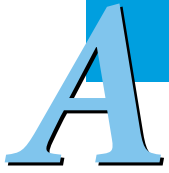

Real-time PCR experiments, however, are influenced by many factors, and therefore efficiency may not be perfect. Thus PCR amplification is more accurately described as:  $T_n = T_0 \times E^n$ , where  $T_n$  is the amount of gene molecules at cycle  $n$ ,  $T_0$  is the initial number of gene molecules,  $n$  is the number of amplification cycles, and  $E$  is the efficiency of amplification.

The figure above shows that the cycle where each reaction first rises above the background depends on the amount of the gene that is present at the beginning of the reaction. The cycle at which the fluorescence of a sample rises above the background fluorescence is called the quantification cycle (Cq) of the sample, also known as "crossing point" (Cp) or "threshold cycle" (Ct).

The estimated quantity may be:

- ▶ Absolute in terms of an actual copy number or quantity, or
- ▶ Relative by comparing a target gene to a reference gene.

Absolute quantification and relative quantification share many common features, including calling of Cq values from amplification curves, use of standards, positive/negative calling, etc. However, since both methods are based on different calculation workflows, they are separated in different analysis modules.

### Positive/negative filter

The LightCycler® 96 Application Software automatically applies a positive/negative filter to produce a qualitative call. The call is made based on criteria like endpoint fluorescence, relative growth, maximum relative slope, and deviation from linearity. The positive/negative algorithm calls three different result types:

- ▶ Positive:  
The fluorescence curve fulfills the criteria for a positive call.
- ▶ Negative:  
The fluorescence curve does not fulfill the criteria for a positive call.
- ▶ Invalid:  
The fluorescence curve shows a very strong deviation from the expected curve shape (very rare cases).

The LightCycler® 96 Application Software provides a function to manually define gene-specific thresholds for the Cq (maximum value), slope (minimum value) and endpoint fluorescence (minimum value) to change the positive/negative call. For detailed information on these settings, see sections [Abs Quant Settings](#), on page 167 and [Rel Quant Settings](#), on page 177.

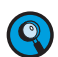

*If results are displayed incorrectly as positive or negative, it is recommended to check the results and edit the corresponding thresholds manually.*

### Cycle of Quantification (Cq)

In an amplification reaction, the cycle at which the fluorescence of a sample rises above the background fluorescence is called the cycle of quantification (Cq) of the sample. The Cq is thus a single value reflecting the cycle number used for quantification.

The larger the quantity (or concentration) of the gene present before amplification, the fewer cycles of amplification will be required to amplify that gene to a detectable level. As the gene reaches a detectable level, the exponential increase of the gene becomes visible as the fluorescence signal from the PCR product is greater than the background fluorescence.

This correlation between amount of template and value of Cq facilitates all types of real-time PCR-based quantitative analysis. Because of this relationship between Cq and starting quantity, real-time PCR makes data acquisition and analysis during the exponential phase easy and therefore allows sensitive quantification of a given target.

The LightCycler® 96 Application Software uses predefined dye-specific fluorescence threshold values to calculate the C<sub>q</sub> value of a sample. The predefined fluorescence threshold value used in an experiment depends on the specified detection format (dye). For detailed information on how to specify the detection format, see section [Detection Format](#), on page 141.

| Dyes                                             | Predefined fluorescence threshold value |
|--------------------------------------------------|-----------------------------------------|
| SYBR Green I, ResoLight                          | 0.2                                     |
| FAM, VIC, Hex, Yellow555, Red610, Texas Red, Cy5 | 0.05                                    |

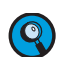

*The C<sub>q</sub> value for a sample is only displayed in the results if the sample is determined 'Positive' by the positive/negative filter algorithm or by the gene-specific threshold set manually by the operator.*

*The C<sub>q</sub> threshold and the positive/negative threshold are two independent thresholds that are not correlated. C<sub>q</sub> values are calculated **once** for each sample and do **not** change when the positive/negative threshold is changed manually by the operator. The C<sub>q</sub> threshold cannot be changed by the operator.*

### Endpoint fluorescence

The endpoint fluorescence (EPF) of an amplification curve indicates the last fluorescence value of the background-corrected curve.

Background correction in all quantification analysis modules is performed by dividing each data point by the background value of the relevant curve and subsequently subtracting a value of "1" (proportional background correction).

### Standard curves

In a quantification analysis, a standard curve is used to determine the quantity of unknown samples and the amplification efficiency of a certain gene. In a standard curve, the quantities of standard samples are plotted against the C<sub>q</sub>s of the samples. The x-axis represents the log of the initial target quantity, and the y-axis represents C<sub>q</sub> in cycles. The standard curve is a linear regression line through these plotted data points.

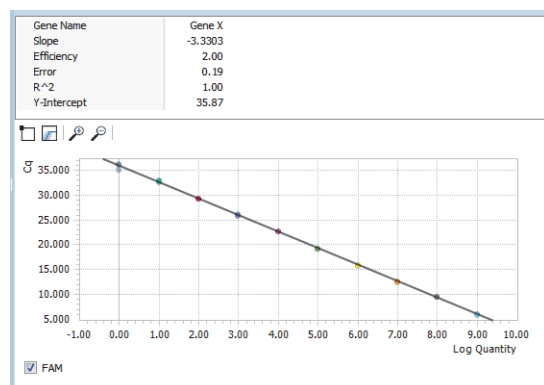

**Figure 14: Standard curve in a quantification experiment**

A standard curve is set up with at least three dilution steps. The quantities chosen for the standard curve should fall between the expected quantity range of the gene of interest.

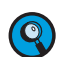

*In the LightCycler® 96 Application Software, at least three standard concentrations are required to calculate the standard curve. Otherwise, no standard curve is calculated.*



- ▶ The PCR *Efficiency* can be calculated using the formula:  $E = 10^{-1/\text{slope}}$  (for example, slope = -3.3 → E = 2).

The software automatically calculates the efficiency and displays it in the standard curve chart.

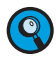

*For the valid use of the standard curve, PCR amplification must be highly reproducible and reaction conditions must be constant for all experiments. It is recommended to run tests to ensure stable PCR efficiency and to use replicate samples (especially for low quantities) to create the standard curve. Also, you should include a previously quantified sample in each analyzed run, to verify that the calculated values are reproducible.*

- ▶ The *Slope* of the standard curve describes the kinetics of the PCR amplification. It indicates how quickly the amount of target nucleic acid (NA) can be expected to increase with the amplification cycles. The slope of the standard curve can be calculated from the *Efficiency* of the amplification reaction using the formula  $s = -\log^E$ . A perfect amplification reaction would produce a standard curve with an efficiency of 2.00.
- ▶ The display of a standard curve shows a *Y-Intercept*. The x-axis is adjusted to display the calculated values properly.
- ▶ The *Standard Error of Estimate* value (mean squared error of the single data points fitted to the regression line) is a measure of the accuracy of the quantification result based on the standard curve (an acceptable value should be < 0.2).
- ▶ The *Correlation Coefficient* of a standard curve shows the r squared value of the correlation.

### 7.1.1 Absolute quantification analysis

Absolute quantification enables you to quantify a single or multiple genes and express the final result as an absolute value (for example, copies/ml). The absolute values for quantity or copy number are derived from dilutions of gene-specific standards with known quantity/copy number.

The easiest way to obtain an absolute value for an unknown quantity of gene is to compare the Cq of an unknown sample against those of standards with known quantities. Standard material can be selected from various sources (for example, linearized plasmid DNA carrying the cloned target sequence, purified PCR products). The gene quantity in the standard must be known. PCR is then performed with a series of dilutions of the standard, which represent different gene quantities in a reaction.

The known template amount of each standard dilution is automatically plotted against the measured Cq values. The resulting regression line is called the standard curve and shows the correlation between Cq and quantity. By comparing the Cq values from samples with unknown amounts of template to this standard curve, one can determine the starting amount of template in each sample.

### 7.1.2 Relative quantification analysis

#### Ratio

Relative quantification compares the levels of two different gene sequences in a single sample (for example, target gene of interest (GOI) and a reference gene), and expresses the final result as a ratio of these genes.

$$\text{ratio} = \frac{\text{target concentration}}{\text{reference concentration}}$$

For comparison purposes, the reference gene is assumed to be present in constant numbers under all test conditions. This reference gene provides a basis for normalizing sample-to-sample differences. To improve this normalization step, multiple reference genes can be chosen. In this case, each relative ratio is calculated separately, and the geometric average is displayed. If no single reference gene is suitable for all samples, consider using more than one reference gene and averaging their assay levels to form a single reference value.

#### Normalized ratio

In addition to calculating sample-specific ratios, a normalized ratio can be calculated by defining a special run-specific sample type, the "run calibrator" sample. This run calibrator is a positive sample with a stable ratio of target-to-reference and is used to normalize all samples within one run. It also provides a constant calibration point between several LightCycler® 96 System runs.

The result is expressed as a normalized ratio, that is, target/reference ratio (unknown sample) divided by target/reference ratio (calibrator):

$$\text{normalized ratio} = \frac{\text{target/reference}_{\text{(unknown sample)}}}{\text{target/reference}_{\text{(run calibrator)}}}$$

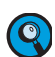

*While a calibrator corrects for differences in detection sensitivity between target and reference caused by differences in probe annealing, probe labeling, or dye extinction coefficients, it does not correct for differences in PCR efficiency between the target and reference gene.*

#### Scaled ratio

In addition to normalization, it is frequently required to measure the gene expression of each sample and each gene at different times or under different conditions. To generate a meaningful result, the sample-specific measurements are normalized to a common basis, that is, a certain experimental condition, to provide a scaled ratio. This condition is specified as the "study calibrator" condition.

The scaled ratio for a specific sample is calculated by dividing all ratios by the ratio of the selected base value (that is, the value in the study calibrator condition):

$$\text{scaled ratio} = \frac{\text{target/reference}_{\text{(unknown sample at condition x)}}}{\text{target/reference}_{\text{(unknown sample at study calibrator condition)}}}$$

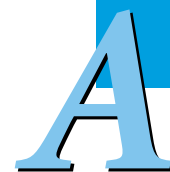

The following example shows the multiwell plate scheme for a simple relative quantification experiment with multiple samples measured under multiple conditions. In this example, "T<sub>S1</sub>" represents the target gene in Sample 1, "R<sub>S1</sub>" the reference gene in Sample 1, "T<sub>S2</sub>" the target gene in Sample 2, and so on.

The study calibrator condition is specified as "0 hours". Then the base value for the calculation is the relative gene expression ratio measured for each sample at the study calibrator condition, that is, the start of the experiment.

|   | 0 h             |                 | 1 h             |                 | 2 h             |                 | 3 h             |                 | 2 d             |                 | 4 d             |                 |          |
|---|-----------------|-----------------|-----------------|-----------------|-----------------|-----------------|-----------------|-----------------|-----------------|-----------------|-----------------|-----------------|----------|
|   | 1               | 2               | 3               | 4               | 5               | 6               | 7               | 8               | 9               | 10              | 11              | 12              |          |
| A | T <sub>S1</sub> | R <sub>S1</sub> | Sample 1 |
| B | T <sub>S2</sub> | R <sub>S2</sub> | Sample 2 |
| C | T <sub>S3</sub> | R <sub>S3</sub> | Sample 3 |
| D | T <sub>S4</sub> | R <sub>S4</sub> | Sample 4 |
| E | T <sub>S5</sub> | R <sub>S5</sub> | Sample 5 |
| F | T <sub>S6</sub> | R <sub>S6</sub> | Sample 6 |
| G | T <sub>S7</sub> | R <sub>S7</sub> | Sample 7 |
| H | T <sub>S8</sub> | R <sub>S8</sub> | Sample 8 |

The scaled ratio for Sample 1, for example after two hours, is calculated as follows:

$$\text{scaled ratio}_{S1, 2h} = \frac{\text{target/reference}_{(S1, 2h)}}{\text{target/reference}_{(S1, 0h)}}$$

The scaled ratio for Sample 2, for example after two hours, is calculated as follows:

$$\text{scaled ratio}_{S2, 2h} = \frac{\text{target/reference}_{(S2, 2h)}}{\text{target/reference}_{(S2, 0h)}}$$

### Scaled ratio including run calibrator

The LightCycler® 96 Application Software provides a third ratio calculation to obtain scaled and normalized ratios. If, in addition to the study calibrator, a run calibrator sample is specified, the scaled normalized ratio for each sample is calculated by dividing the normalized ratios of all conditions by the normalized ratio of the study calibrator condition:

$$\text{scaled normalized ratio} = \frac{\frac{\text{target/reference}_{(\text{unknown sample at condition x})}}{\text{target/reference}_{(\text{run calibrator})}}}{\frac{\text{target/reference}_{(\text{unknown sample at study calibrator condition})}}{\text{target/reference}_{(\text{run calibrator})}}}$$

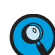

Relative quantification usually requires the use of either a run calibrator or a study calibrator per single multiwell plate to generate detection-sensitivity-corrected results for all measured genes. Only when multiple plates are combined in a relative quantification study, might special plate setups require the use of both, a run calibrator and a study calibrator.

## PCR efficiency correction

The reliability of all quantitative real-time PCR applications and, consequently, of all relative quantification calculations depends on the quality of the PCR. The final ratio resulting from the relative quantification is a function of PCR efficiency and of the quantification cycles. It does not require the knowledge of absolute copy numbers at the detection threshold. Thus, the analysis does not determine the actual quantity of DNA in the samples.

A target-specific efficiency can be either:

- ▶ Derived from in-run target-specific standard curves, or
- ▶ Set manually if no standards are defined or if standards are excluded from the calculation.

This efficiency-corrected ratio calculation is automatically performed by the LightCycler® 96 Application Software.

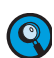

*The basic prerequisites for accurate relative quantification are:*

- ▶ *When standards are used, the efficiencies of the relative standards and the unknown samples are identical.*
- ▶ *The efficiencies of both target and reference PCR do not vary from sample to sample.*
- ▶ *The reference gene is not regulated in the system being examined.*

## Ratio calculation for a single reference gene

If only one reference gene is used in experiments, the following basic calculations for ratio, normalized ratio and scaled ratio are performed:

$$\text{ratio} = \frac{E_R^{Cq_R}}{E_T^{Cq_T}}$$

$$\text{normalized or scaled ratio} = \frac{E_T^{(Cq_{T, \text{cal}} - Cq_T)}}{E_R^{(Cq_{R, \text{cal}} - Cq_R)}}$$

|        |                                                |
|--------|------------------------------------------------|
| $E_T$  | Amplification efficiency of the target gene    |
| $E_R$  | Amplification efficiency of the reference gene |
| $Cq_T$ | Quantification cycle of the target gene        |
| $Cq_R$ | Quantification cycle of the reference gene     |
| cal    | Run or study calibrator                        |



## Ratio calculation for multiple reference genes

If multiple reference genes are used in an experiment, the geometric mean of the concentration ratios is calculated. In a case with two references and use of a run calibrator or study calibrator, the following formula applies:

$$\text{ratio} = \frac{\sqrt{E_{R1}^{Cq_{R1}} \times E_{R2}^{Cq_{R2}}}}{E_T^{Cq_T}}$$

$$\text{normalized or scaled ratio} = \frac{E_T^{(Cq_{T, \text{cal}} - Cq_T)}}{\sqrt{E_{R1}^{(Cq_{R1, \text{cal}} - Cq_{R1})} \times E_{R2}^{(Cq_{R2, \text{cal}} - Cq_{R2})}}}$$

Calculations with more than two reference genes are performed, taking higher orders of the root by calculating the product of all terms.

$$\text{ratio} = \frac{\sqrt[n]{\prod_{i=1}^n E_{Ri}^{Cq_{Ri}}}}{E_T^{Cq_T}}$$

$$\text{normalized or scaled ratio} = \frac{E_T^{(Cq_{T, \text{cal}} - Cq_T)}}{\sqrt[n]{\prod_{i=1}^n E_{Ri}^{(Cq_{Ri, \text{cal}} - Cq_{Ri})}}}$$

|           |                                                  |
|-----------|--------------------------------------------------|
| $E_T$     | Amplification efficiency of the target gene      |
| $E_{Ri}$  | Amplification efficiency of the reference gene i |
| $Cq_T$    | Quantification cycle of the target gene          |
| $Cq_{Ri}$ | Quantification cycle of the reference gene i     |
| cal       | Run or study calibrator                          |

## Error calculation

The calculations in the LightCycler® 96 Application Software are based on measured values which have uncertainties (represented by the standard deviations of technical replicates). The functions employed in relative quantification analysis calculations combine these values and lead to a complex error propagation.

The LightCycler® 96 Application Software follows the principle of linearization and standard distribution when statistical variables and error propagation occur. The employed method is also known as the "Delta Method" in statistics and is based on taking the first derivative of the functions calculating ratio, normalized ratio or scaled ratio. For variable calculation a first order linear approximation is performed (known as "first order Taylor series expansion").

The calculations in relative quantification analysis are based on the quantification cycle (Cq) and the PCR efficiency (E). However, for error calculation only the Cq values are considered uncertain. The gene-specific PCR efficiencies are regarded as exact values.

In the case of uncorrelated uncertainties and assumption of a normal distribution, the standard deviation of a function can be written as the sum of weighted variances of the components.

$$sd(\text{ratio}) \approx \sqrt{\sum_{k=1}^n \left( \left( \frac{\partial \text{ratio}}{\partial Cq_k} \right)^2 \text{var}(Cq_k) \right)}$$

The weighted terms for each individual gene (each technical replicate group) are calculated by the following formula and hold true for any number of genes and combinations thereof:

$$\left( \frac{\delta r_j}{\delta Cq_g} \right)^2 = \left( \frac{r_j}{n_g} \times \ln(E_g) \right)^2$$

|                                  |                                                          |
|----------------------------------|----------------------------------------------------------|
| $\frac{\delta r_j}{\delta Cq_g}$ | Partial first derivative of $r_j$ with respect to $Cq_g$ |
| $r_j$                            | Ratio j                                                  |
| $Cq_g$                           | Quantification cycle of gene g                           |
| $n_g$                            | Number of genes of a certain type (target or reference)  |
| $E_g$                            | Efficiency of gene g                                     |

### 7.1.3 Qualitative detection analysis

Qualitative detection analyzes the presence of a target nucleic acid in combination with an internal control nucleic acid. The internal control serves as an amplification control allowing:

- ▶ Monitoring of PCR inhibitors.
- ▶ Monitoring the reliability of purification and amplification processes.

The internal control might be RNA or DNA, depending on the type of the target nucleic acid. During PCR, the internal control is amplified with a separate set of primers. The analysis does not quantify the amount (copy number) of a target nucleic acid.

Operators can amplify the internal control either in a separate reaction well (mono-color mode) or in the same reaction well (dual-color or multi-color mode):

- ▶ The advantage of a mono-color setup is optimal sensitivity as there is no competition between target and internal control.
- ▶ The advantage of a dual-color or multi-color setup is the minimized material requirement (sample amount and PCR components) and the direct inhibition control in the same well where the target is amplified. In a multi-color setup, different internal controls can be combined with different target genes.

The analysis provides the results as a "combined call" by combining individual positive or negative calls of both the target and the internal control.

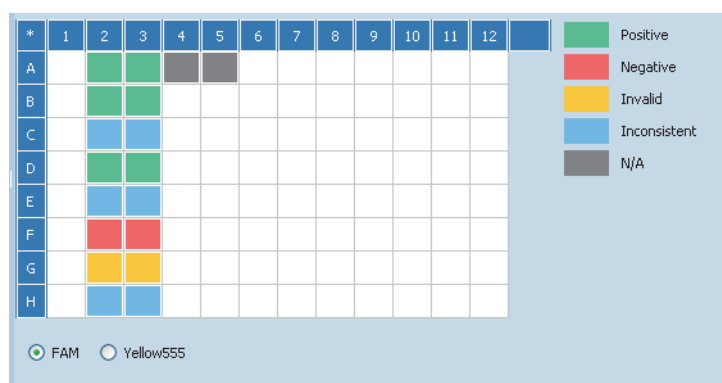

Figure 15: Combined Call Heat Map for a dual-color qualitative detection experiment

Three basic result types are provided:

- ▶ Positive combined call: Positive target call, positive or negative internal control call.
- ▶ Negative combined call: Negative target call, positive internal control call.
- ▶ Invalid combined call: Negative target call, negative internal control call.

When replicates are used, inconsistent combined calls might occur based on the following result combinations:

- ▶ Inconsistent combined call: Target replicate calls positive and negative, independent of internal control replicate calls.
- ▶ Inconsistent combined call: All target replicate calls negative, internal control replicate calls positive and negative.

## 7.2 Endpoint genotyping analysis

Endpoint genotyping analysis is used for SNP (single nucleotide polymorphism) genotyping (also known as allelic discrimination). Endpoint genotyping assays use hydrolysis probes. For detailed information, see section [Monitoring PCR with hydrolysis probes](#), on page 66.

An endpoint genotyping assay includes two sequence-specific probes that are designed to detect allele x and allele y and are labeled with different reporter dyes.

In a standard setup

- ▶ The FAM dye detects samples that are homozygous for allele x.
- ▶ The VIC dye detects samples that are homozygous for allele y.

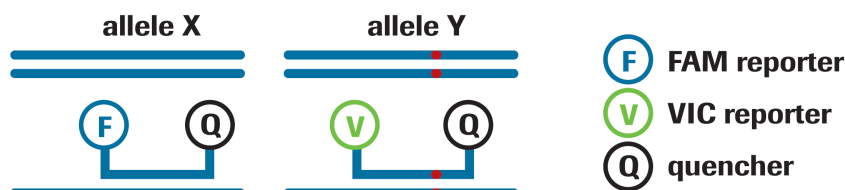

**Figure 16: Dual-color principle of endpoint genotyping**

Fluorescence data are collected throughout the PCR amplification. However, only the endpoint signal intensities of the two reporter dyes are used to identify the genotypes. The relative dye intensities can be visualized on a scatter plot, simplifying discrimination into homozygous x, homozygous y, and heterozygous samples. After manually setting up the thresholds, the LightCycler® 96 Application Software groups the samples based on the intensity distribution of the two dyes.

LightCycler® 96 Application Software allows manual grouping of samples with similar fluorescence distribution in the scatter plot. The following groups can be defined by the operator:

- ▶ Negatives
- ▶ Homozygous for allele x
- ▶ Homozygous for allele y
- ▶ Heterozygous
- ▶ Unknowns

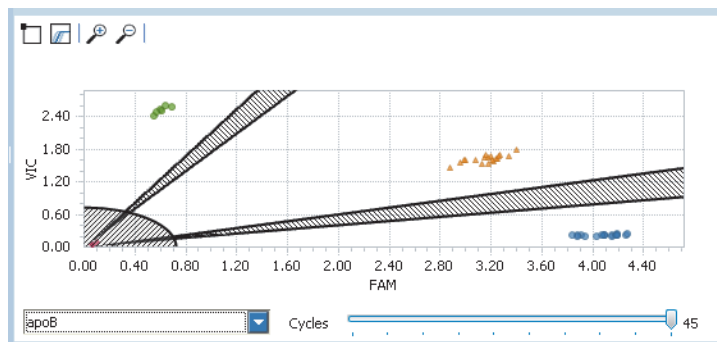

**Figure 17: Scatterplot for an endpoint genotyping experiment**

Each point represents a sample, whose x-coordinate is the endpoint level of allele x, and whose y-coordinate is the endpoint level of allele y.

### 7.3 $T_m$ calling analysis

The temperature at which DNA strands separate or melt when heated can vary over a wide range, depending on the sequence, the length of the strand, DNA quantity, and buffer composition. For example, melting temperatures can vary for products of the same length but different Adenine-Thymine/Guanine-Cytosine ratio (AT/GC ratio), or for products with the same length and GC content but with a different GC distribution. Also, base pair mismatches between two DNA molecules lead to a decrease in melting temperature. This effect is more pronounced for short DNA amplicons.

The purpose of  $T_m$  calling is to determine the characteristic melting temperature of the target DNA.

To analyze sample melting temperature profiles, the fluorescence of the samples must be monitored while the temperature of the LightCycler® 96 Instrument thermal block cycler is steadily increased. As the temperature increases, sample fluorescence decreases. In the case of the double-stranded DNA-specific dye SYBR Green I or the ResoLight dye, this is due to the separation of the DNA strands and consequently the release of dye molecules.

A  $T_m$  calling analysis can be performed on any experiment that includes a melting program. A melting program is usually performed after amplification of the target DNA. A typical melting program includes three segments:

- ▶ The samples are rapidly heated to a temperature high enough to denature all DNA molecules.
- ▶ The samples are cooled below the annealing temperature of the target DNA.
- ▶ The samples are slowly heated while measuring sample fluorescence as the target DNA melts.

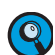

*You can use melting temperatures from +37 to +98°C.*

#### Melting curves

The analysis displays a melting curves chart of sample fluorescence against temperature. The chart shows the downward curve in fluorescence for the samples as they melt.

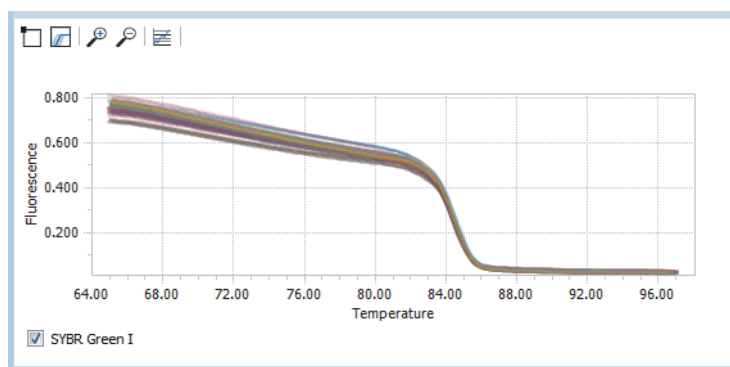

**Figure 18: Melting Curves chart for a  $T_m$  calling experiment**

## Melting peaks

The analysis also displays a melting peaks chart that plots the first negative derivative of the sample fluorescent curves. In this chart, the melting temperature of each sample appears as a peak. Displaying the melting temperatures as peaks makes it easier to distinguish each sample's characteristic melting profile and to discern differences between samples.

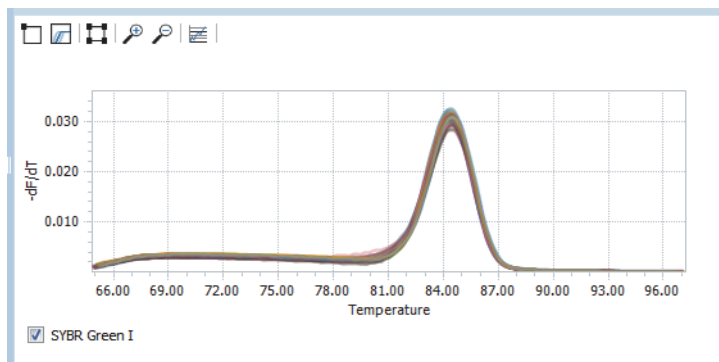

**Figure 19: Melting Peaks chart for a  $T_m$  calling experiment**

The decrease in fluorescence during melting is, in the case of DNA-binding dyes (for example, SYBR Green I, ResoLight dye), due to the separation of DNA strands and consequently the release of dye molecules. As these dyes only fluoresce at 530 nm if bound to double-stranded DNA, melting drastically decreases fluorescence at this wavelength. The melting temperature, or  $T_m$ , is defined as the point at which half of the DNA is double-stranded and half is single-stranded.

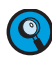

*After amplification in a hydrolysis probe PCR assay, all probes are hydrolyzed. Thus,  $T_m$  calling cannot be performed.*



## 7.4 High resolution melting analysis

High resolution melting is a refinement of well-established DNA dissociation (or "melting") techniques (for example, to determine the  $T_m$  of a DNA hybrid). Like all melting analyses, the technique subjects DNA samples to increasing temperatures and records the details of their dissociation from double-stranded (dsDNA) to single-stranded form (ssDNA).

Amplification and high resolution melting are performed in the presence of a fluorescent dye that binds only dsDNA (for example, ResoLight dye) and is present in excess of the binding capacity of DNA. The dye does not interact with ssDNA, but fluoresces strongly after intercalating into dsDNA. This change in fluorescence can be used both to measure the increase in DNA quantity during PCR and then to directly measure thermally-induced DNA dissociation during high resolution melting.

While high resolution melting dyes bind the target DNA in saturation, dye dissociation during melt results in a fluorescence decrease at any melting temperature, because released dye cannot bind back to remaining double-stranded sequences as all sequences are dye-saturated anyway. The use of dsDNA-binding dyes in saturation quantities prevents the measurement of artifacts which can result from dye-limited conditions.

For detection of sequence variations, differences in the melting curves of the amplicons are analyzed. Heterozygote DNA forms heteroduplexes that begin to separate into single strands at a lower temperature and with a different curve shape than homozygote DNA. Homozygote mutants usually melt with a similar curve shape but at different temperatures compared to the wild type. Melting temperature differences are very small depending on the type of nucleotide exchange.

The table below shows the SNP classes and typical  $T_m$  shifts:

| SNP class | Base change | Typical $T_m$ shift | Occurrence in human genome |
|-----------|-------------|---------------------|----------------------------|
| 1         | C/T & G/A   | approx. 1.0°C       | 64%                        |
| 2         | C/A & G/T   | approx. 1.0°C       | 20%                        |
| 3         | C/G         | 0.2 to 0.5°C        | 9%                         |
| 4         | A/T         | < 0.2°C             | 7%                         |

In a melting experiment, fluorescence is initially high, because the sample starts as dsDNA, but fluorescence diminishes as the temperature is raised and DNA dissociates into single strands. The observed "melting" behavior is characteristic of a particular DNA sample. Mutations in PCR products are detectable because they change the shape or location of the melting curve. When the mutant sample is compared to a reference "wild type" sample, these changes are visible.

An automated algorithm calculates groups of genotypes based on automated normalization and sensitivity settings. Operators can overrule the automated calls either by adapting the algorithm settings or via a manual annotation function which overrules the algorithm group calls. Manual annotation can be performed in the normalized melting curves chart, the normalized melting peaks chart and the difference plot.

## Melting curves

The analysis displays a melting curves chart of the relevant target's dye intensity against temperature. The chart shows the downward curve in fluorescence for the samples as they melt.

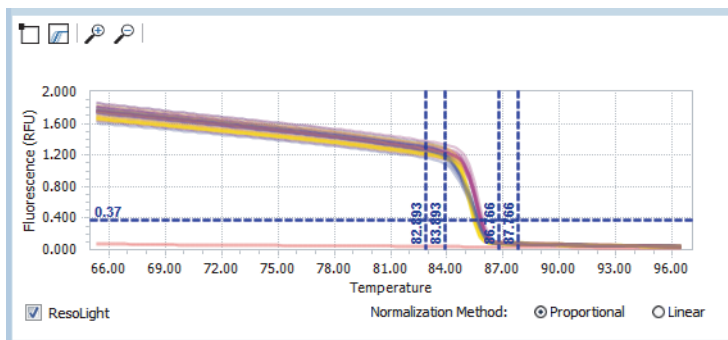

**Figure 20: Melting Curves chart for a high resolution melting experiment**

The algorithm provides default settings for the temperature ranges specifying the normalization areas. The sliders in the melting curves chart allow for changing the Pos/Neg threshold and the temperature ranges manually. Additionally, two methods are provided for normalization: proportional normalization (default) and linear normalization.

## Normalized melting curves

Normalized melting curves are calculated by normalizing the raw melting curve data according to the values specified in the melting curves chart. The pre-melting and post-melting signals of all samples are set to uniform values. Pre-melting signals are uniformly set to a relative value of 100%, while post-melting signals are set to a relative value of 0%.

Normalizing the initial and final fluorescence in all samples aids interpretation and analysis of the data.

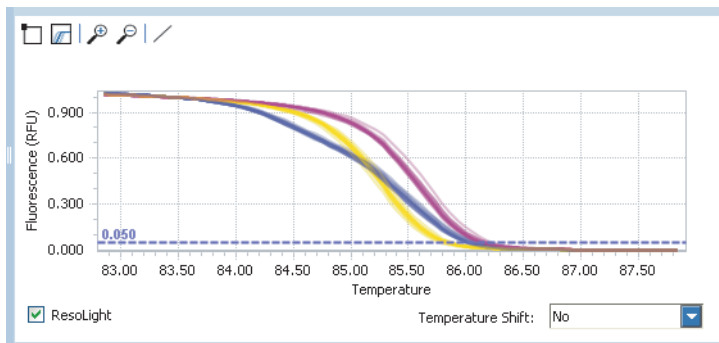

**Figure 21: Normalized Melting Curves chart for a high resolution melting experiment**

The operator can apply a temperature shift to all data. This shift only changes the display of the curves, but does not change automated group calculation by algorithm or manual group assignment. The temperature shift normalizes all melting curves to the specified intensity threshold. As the calculation of the algorithm is not influenced by the temperature shift, this function only supports visual discrimination of poor data for subsequent manual annotation.

## Normalized melting peaks

The analysis also displays a peaks chart that plots the first negative derivative of the normalized melting curves. In this chart, the melting temperature range of each sample appears as a peak. Displaying the fluorescence curves as peaks enables improved discrimination of complex groupings.

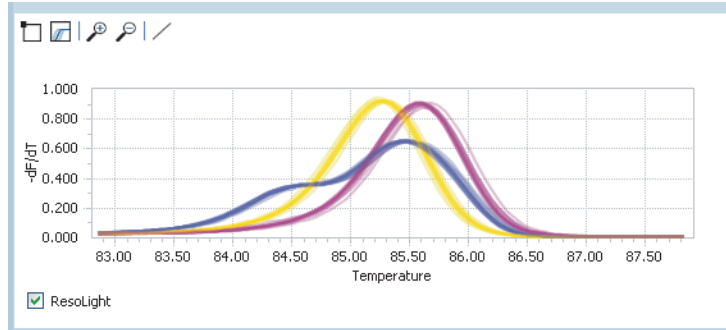

Figure 22: Normalized Melting Peaks chart for a high resolution melting experiment

## Difference plot

The difference plot allows for further analyzing the differences in melting curve shape by subtracting a reference curve (also called "baseline sample") from the melting curve in question. This generates a difference plot, which helps cluster samples into groups that have similar melting curves (for example, those with the same genotype).

When more than one baseline is selected, the curves from all selected baseline wells are averaged, and this average curve is used as the reference curve to be subtracted. The algorithm automatically uses the average curve of the group with the most members as the default baseline.

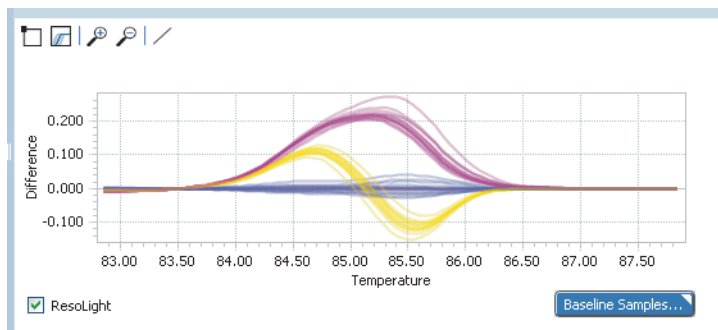

Figure 23: Difference Plot chart for a high resolution melting experiment

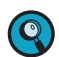

*In heterozygous samples, the melting curve shape normally shows multiple temperature transitions, because the observed melting curve is a composite of both heteroduplex and homoduplex components. Heteroduplexes formed in the sample (between the wild type and variant strands) are less stable than the homoduplexes formed, and thus dissociate more readily.*

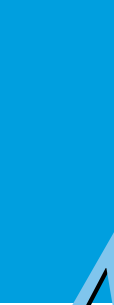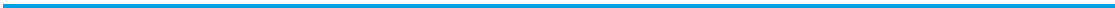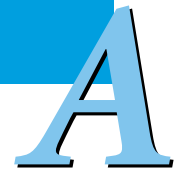

**Chapter B**  
**LightCycler<sup>®</sup> 96 Application Software**

*B*

| <b>B</b> | <b>LightCycler® 96 Application Software</b> | <b>85</b>  |
|----------|---------------------------------------------|------------|
| <b>1</b> | <b>Overview</b>                             | <b>89</b>  |
| 1.1      | Starting the software                       | 90         |
| 1.2      | Startup wizard                              | 90         |
| 1.3      | The main window                             | 93         |
| 1.3.1    | Menu bar                                    | 94         |
| 1.3.2    | Tool bar                                    | 96         |
| 1.3.3    | Working window area tabs                    | 97         |
| 1.3.4    | Experiment bar                              | 97         |
| 1.4      | General software conventions                | 98         |
| 1.4.1    | Regional settings                           | 98         |
| 1.4.2    | Buttons                                     | 98         |
| 1.4.3    | Input fields                                | 98         |
| 1.4.4    | Working with tables                         | 99         |
| 1.4.5    | Working with graphs                         | 106        |
| 1.4.6    | Working with heat maps                      | 109        |
| 1.4.7    | Working with plate views                    | 111        |
| 1.4.8    | Working with sections                       | 112        |
| 1.5      | Experiments                                 | 113        |
| 1.5.1    | Experiment file types                       | 113        |
| 1.5.2    | Creating an experiment                      | 113        |
| 1.5.3    | Opening an experiment                       | 115        |
| 1.5.4    | Saving an experiment                        | 116        |
| 1.5.5    | Experiment properties                       | 117        |
| 1.5.6    | Experiment report                           | 118        |
| 1.6      | Import, export, and file transfer options   | 121        |
| 1.6.1    | Import data                                 | 121        |
| 1.6.2    | Export data                                 | 122        |
| 1.7      | Disregarding positions from an analysis     | 123        |
| 1.8      | Exiting the software                        | 123        |
| <b>2</b> | <b>Tools</b>                                | <b>124</b> |
| 2.1      | Instrument Manager                          | 124        |
| 2.1.1    | Instruments window area                     | 125        |
| 2.1.2    | Information tab                             | 127        |
| 2.1.3    | Send/Receive Experiments tab                | 128        |
| 2.1.4    | Online Monitoring tab                       | 130        |
| 2.2      | Result Batch Export                         | 131        |
| 2.2.1    | Analysis type                               | 132        |
| 2.2.2    | File selection                              | 132        |
| 2.2.3    | Export                                      | 133        |
| <b>3</b> | <b>Preferences</b>                          | <b>134</b> |
| <b>4</b> | <b>Run Editor tab</b>                       | <b>135</b> |
| 4.1      | Programs window area                        | 135        |
| 4.1.1    | Programs list buttons                       | 136        |
| 4.1.2    | Programs list shortcut menu                 | 136        |
| 4.1.3    | Adding a new program                        | 136        |
| 4.2      | Steps window area                           | 138        |
| 4.2.1    | Steps list buttons                          | 138        |
| 4.2.2    | Steps list shortcut menu                    | 138        |
| 4.2.3    | Step settings                               | 139        |
| 4.3      | Measurement window area                     | 141        |
| 4.4      | Temperature Profile window area             | 142        |

|          |                                                                 |     |
|----------|-----------------------------------------------------------------|-----|
| <b>5</b> | <b>Sample Editor tab</b>                                        | 143 |
| 5.1      | Plate View tab                                                  | 144 |
| 5.1.1    | Multiwell plate image                                           | 145 |
| 5.1.2    | Reaction Properties window area                                 | 145 |
| 5.1.3    | Replicate Group window area                                     | 147 |
| 5.1.4    | Visible Details                                                 | 148 |
| 5.1.5    | Print/Save Plate                                                | 148 |
| 5.1.6    | Plate ID                                                        | 149 |
| 5.1.7    | Failure Constraints                                             | 150 |
| 5.1.8    | Auto Standard Curve                                             | 151 |
| 5.1.9    | Clear Wells/Set to Default                                      | 153 |
| 5.2      | Table View tab                                                  | 154 |
| 5.2.1    | Sample table                                                    | 155 |
| 5.2.2    | Exporting the sample list                                       | 156 |
| 5.2.3    | Importing sample data                                           | 157 |
| <b>6</b> | <b>Raw Data tab</b>                                             | 159 |
| <b>7</b> | <b>Analysis tab</b>                                             | 162 |
| 7.1      | Absolute quantification                                         | 166 |
| 7.1.1    | Abs Quant Settings                                              | 167 |
| 7.1.2    | Amplification Curves                                            | 169 |
| 7.1.3    | Heat Map                                                        | 170 |
| 7.1.4    | Result Table                                                    | 171 |
| 7.1.5    | Standard Curves                                                 | 174 |
| 7.1.6    | Melting Peaks                                                   | 174 |
| 7.1.7    | Cq Bars                                                         | 175 |
| 7.2      | Relative quantification                                         | 176 |
| 7.2.1    | Rel Quant Settings                                              | 177 |
| 7.2.2    | Amplification Curves                                            | 179 |
| 7.2.3    | Ratio Bars                                                      | 180 |
| 7.2.4    | Result Table                                                    | 181 |
| 7.2.5    | Standard Curves                                                 | 185 |
| 7.2.6    | Melting Peaks                                                   | 185 |
| 7.2.7    | Heat Map                                                        | 185 |
| 7.2.8    | Cq Bars                                                         | 185 |
| 7.3      | Qualitative Detection                                           | 186 |
| 7.3.1    | Qualitative Detection settings for a dual- or multi-color setup | 187 |
| 7.3.2    | Qualitative Detection Settings                                  | 187 |
| 7.3.3    | Amplification Curves                                            | 189 |
| 7.3.4    | Heat Map                                                        | 189 |
| 7.3.5    | Combined Call Heat Map                                          | 190 |
| 7.3.6    | Result Table                                                    | 191 |
| 7.4      | Endpoint genotyping                                             | 193 |
| 7.4.1    | Endpoint Genotyping Settings                                    | 194 |
| 7.4.2    | Amplification Curves                                            | 195 |
| 7.4.3    | Scatter Plot                                                    | 196 |
| 7.4.4    | Heat Map                                                        | 198 |
| 7.4.5    | Result Table                                                    | 199 |
| 7.5      | $T_m$ calling                                                   | 200 |
| 7.5.1    | Melting Analysis Parameters                                     | 201 |
| 7.5.2    | Melting Curves                                                  | 203 |
| 7.5.3    | Melting Peaks                                                   | 203 |
| 7.5.4    | Heat Map                                                        | 204 |
| 7.5.5    | Result Table                                                    | 205 |
| 7.5.6    | Amplification Curves                                            | 206 |

---

|       |                                        |     |
|-------|----------------------------------------|-----|
| 7.6   | High Resolution Melting .....          | 207 |
| 7.6.1 | Select HRM Gene .....                  | 208 |
| 7.6.2 | High Resolution Melting Settings ..... | 208 |
| 7.6.3 | Melting Curves .....                   | 212 |
| 7.6.4 | Normalized Melting Curves .....        | 213 |
| 7.6.5 | Normalized Melting Peaks .....         | 215 |
| 7.6.6 | Difference Plot .....                  | 215 |
| 7.6.7 | Result Table .....                     | 216 |
| 7.6.8 | Heat Map .....                         | 217 |
| 7.6.9 | Amplification Curves .....             | 217 |
| 7.7   | Exporting analysis results .....       | 218 |
| 7.7.1 | Exporting the result table .....       | 218 |
| 7.7.2 | Exporting multiple result data .....   | 218 |

# LightCycler® 96 Application Software

## 1 Overview

The LightCycler® 96 Application Software provides all functions for defining an experiment protocol and analyzing the data gathered during the experiment run.

- ▶ Specifying the temperature profile and the dye-specific parameters for an experiment run; see section [Run Editor tab](#), on page 135.
- ▶ Creating, editing, deleting, and rearranging samples and genes present in the wells, as well as the dyes used to label each gene; see section [Sample Editor tab](#), on page 143.
- ▶ Creating analysis, defining analysis settings, and viewing the calculated results of an experiment run; see section [Analysis tab](#), on page 162.

For starting a run, the experiment must be transferred to the LightCycler® 96 Instrument. For analysis, the raw data gathered by the LightCycler® 96 Instrument Software must be transferred back to the application software. For detailed information on the LightCycler® 96 Instrument Software, see chapter [LightCycler® 96 Instrument Software](#), on page 219.

The computer running the LightCycler® 96 Application Software can be connected to the LightCycler® 96 Instrument either via a local Ethernet network or directly (one-to-one connection). In both cases, the operator can register the instrument with the software for monitoring the instrument and for sending and retrieving experiments. For detailed information, see section [Instrument Manager](#), on page 124.

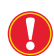

*The LightCycler® 96 Application Software may be installed on a computer which is connected to a network. Please be aware that such connection may have an adverse effect on the product's integrity, for example, through infection with malicious code (viruses, Trojan horses, etc.) or access by unauthorized third parties (such as intrusion by hackers). Roche therefore highly recommends protecting the product against such risks by taking appropriate and state-of-the-art action.*

*As the product is not intended to be used within networks without an appropriate firewall, and has not been designed for such use, Roche assumes no liability in this regard.*

B

## 1.1 Starting the software

Before starting the software, it must be installed on your computer. For detailed information on the installation, see section [Installing the LightCycler® 96 Application Software](#), on page 57.

### To start the LightCycler® 96 Application Software

- 1 Switch on the computer.
- 2 Perform one of the following steps:
  - ▶ Double-click the *LightCycler® 96 SW 1.1* icon on your desktop.

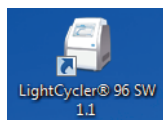

- ▶ In the *Start* menu, navigate to the *LightCycler® 96* folder and choose the *LightCycler® 96* entry.

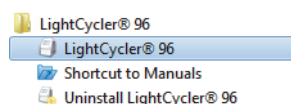

The LightCycler® 96 Application Software provides a splash screen with information on the initialization status. After initialization, the main window opens displaying the startup wizard (see below).

## 1.2 Startup wizard

The startup wizard opens after the LightCycler® 96 Application Software is launched. It provides shortcuts to high-level tasks like creating or opening an experiment, and links to additional information.

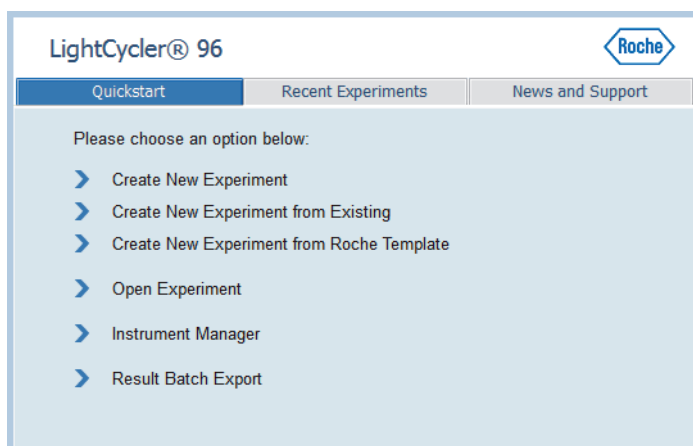

Figure 24: Startup wizard, Quickstart tab

## Quickstart tab

The *Quickstart* tab (see [Figure 24](#) above) provides the following shortcuts:

| Shortcut                                         | Description                                                                                                                                                                                                                            |
|--------------------------------------------------|----------------------------------------------------------------------------------------------------------------------------------------------------------------------------------------------------------------------------------------|
| <i>Create New Experiment</i>                     | Creates a new, empty experiment. For detailed information, see section <a href="#">To generate a new experiment</a> , on page 113.                                                                                                     |
| <i>Create New Experiment from Existing</i>       | Opens the <i>Open</i> dialog box for choosing an existing experiment to be used as a template. For detailed information, see section <a href="#">To use an existing experiment as a template</a> , on page 114.                        |
| <i>Create New Experiment from Roche Template</i> | Opens the <i>Open</i> dialog box for choosing an experiment template provided by Roche. For detailed information, see section <a href="#">To use a Roche template</a> , on page 114.                                                   |
| <i>Open Experiment</i>                           | Opens the <i>Open</i> dialog box for choosing an experiment. For detailed information, see section <a href="#">To open an experiment</a> , on page 115.                                                                                |
| <i>Instrument Manager</i>                        | Opens the <i>Instrument Manager</i> dialog box for managing the LightCycler® 96 Instruments registered with the application software. For detailed information, see section <a href="#">Instrument Manager</a> , on page 124.          |
| <i>Result Batch Export</i>                       | Opens the <i>Result Batch Export</i> wizard for creating a file with result table data collected from different experiments of the same type. For detailed information, see section <a href="#">Result Batch Export</a> , on page 131. |

## Recent Experiments tab

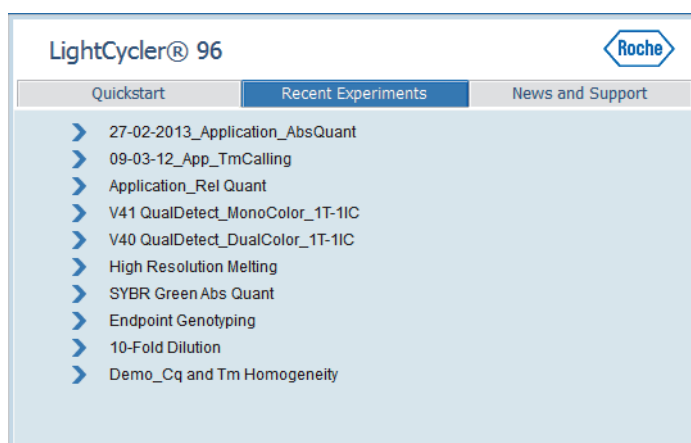

**Figure 25: Startup wizard, Recent Experiments tab**

The *Recent Experiments* tab lists the 10 last-opened experiments. If one of the recent experiments is no longer available, the corresponding entry is deleted.

Choosing one of the list entries opens the corresponding experiment.

## News and Support tab

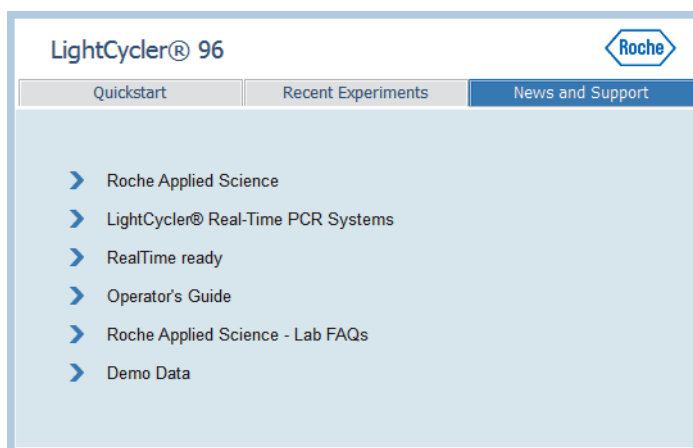

**Figure 26: Startup wizard, News and Support tab**

The *News and Support* tab provides links to the following websites and locations:

| Shortcut                                  | Link/Description                                                                                                                                                                                                                    |
|-------------------------------------------|-------------------------------------------------------------------------------------------------------------------------------------------------------------------------------------------------------------------------------------|
| <i>Roche Applied Science</i>              | <a href="http://www.roche-applied-science.com">http://www.roche-applied-science.com</a>                                                                                                                                             |
| <i>LightCycler® Real-Time PCR Systems</i> | <a href="http://www.lightcycler.com">http://www.lightcycler.com</a>                                                                                                                                                                 |
| <i>RealTime ready</i>                     | <a href="http://realtimeready.roche.com">http://realtimeready.roche.com</a>                                                                                                                                                         |
| <i>Operator's Guide</i>                   | Displays the LightCycler® System Guides.                                                                                                                                                                                            |
| <i>Roche Applied Science - Lab FAQs</i>   | Displays the Roche Applied Science Lab FAQs product information:<br><a href="https://www.roche-applied-science.com/PROD_INF/index.jsp?&amp;id=labfaqs">https://www.roche-applied-science.com/PROD_INF/index.jsp?&amp;id=labfaqs</a> |
| <i>Demo Data</i>                          | Displays the demo experiment files delivered with the software. The files are located in the LightCycler® 96 Application Software home directory under <i>DemoData</i> .                                                            |

### 1.3 The main window

The figure below shows the main window of the LightCycler® 96 Application Software (in this example, the *Run Editor* tab of an experiment is shown). The main window contains the following areas, described below:

- ▶ Menu bar; see section [Menu bar](#), on page 94.
- ▶ Tool bar; see section [Tool bar](#), on page 96.
- ▶ Working window area with working window area tabs representing the main software functions; see section [Working window area tabs](#), on page 97.
- ▶ Experiment bar; see section [Experiment bar](#), on page 97.

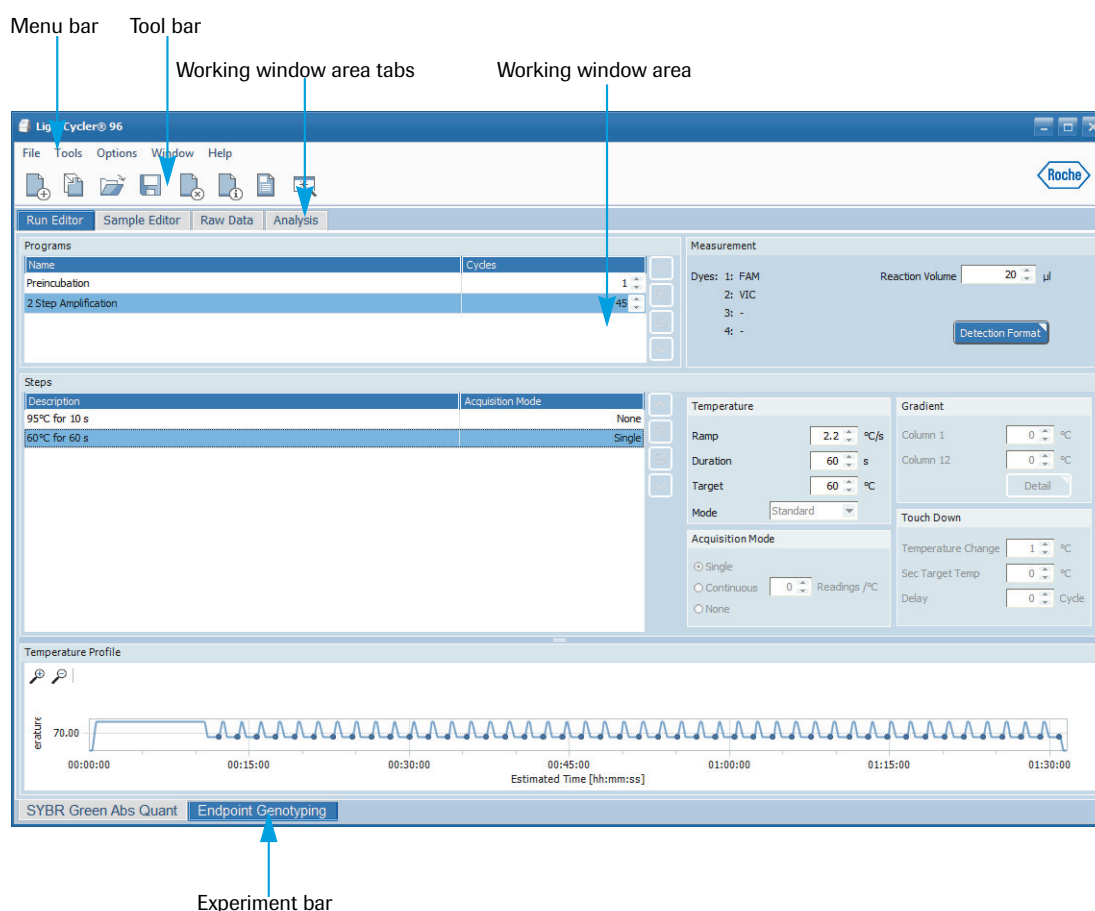

Figure 27: LightCycler® 96 Application Software main window

### 1.3.1 Menu bar

The menu bar provides access to the software functions.

#### File menu

The commands in the *File* menu provide functions for managing experiments and for exiting the LightCycler® 96 Application Software.

| Command                                        | Description                                                                                                                                                                                                      |
|------------------------------------------------|------------------------------------------------------------------------------------------------------------------------------------------------------------------------------------------------------------------|
| <i>New &gt; Experiment</i>                     | Creates a new, empty experiment. For detailed information, see section <a href="#">To generate a new experiment</a> , on page 113.                                                                               |
| <i>New &gt; Experiment from Existing</i>       | Opens a file selection dialog box for choosing an existing experiment to be used as a template. For detailed information, see section <a href="#">To use an existing experiment as a template</a> , on page 114. |
| <i>New &gt; Experiment from Roche Template</i> | Opens a file selection dialog box for choosing an experiment template provided by Roche. For detailed information, see section <a href="#">To use a Roche template</a> , on page 114.                            |
| <i>Open</i>                                    | Opens a file selection dialog box for choosing an experiment. For detailed information, see section <a href="#">To open an experiment</a> , on page 115.                                                         |
| <i>Close</i>                                   | Closes the current experiment file.<br>The operator is prompted to save unsaved data before the experiment is closed.                                                                                            |
| <i>Recent Files</i>                            | Lists the recently opened experiments. Choosing one of the list entries opens the corresponding experiment.                                                                                                      |
| <i>Save</i>                                    | Saves the current experiment to its associated file. For detailed information, see section <a href="#">To save an experiment</a> , on page 116.                                                                  |
| <i>Save As</i>                                 | Saves the current experiment to a new file. For more information, see section <a href="#">To save an experiment</a> , on page 116.                                                                               |
| <i>Properties</i>                              | Opens the <i>Properties</i> dialog box displaying the experiment summary and the experiment notes. For detailed information, see section <a href="#">Experiment properties</a> , on page 117.                    |
| <i>Exit</i>                                    | Exits the LightCycler® 96 Application Software.<br>The operator is prompted to save unsaved data before the application shuts down.                                                                              |

#### Tools menu

The *Tools* menu provides access to the following functions:

| Command                    | Description                                                                                                                                                                                                                              |
|----------------------------|------------------------------------------------------------------------------------------------------------------------------------------------------------------------------------------------------------------------------------------|
| <i>Instrument Manager</i>  | Opens the <i>Instrument Manager</i> wizard for managing and monitoring the LightCycler® 96 Instruments registered with the application software. For detailed information, see section <a href="#">Instrument Manager</a> , on page 124. |
| <i>Result Batch Export</i> | Opens the <i>Result Batch Export</i> wizard, which allows for exporting the result table data collected from multiple experiment files. For detailed information, see section <a href="#">Result Batch Export</a> , on page 131.         |

## Options menu

The *Options* menu provides general configuration functions. The *Preferences* command opens the *Preferences* dialog box, which provides access to the following functions. For detailed information, see section [Preferences](#), on page 134.

- ▶ Defining the default directory for searching for and saving experiment files.
- ▶ Defining an email address to be linked to all experiments generated with the current software instance.

## Window menu

The *Show Startup Wizard* command in the *Window* menu provides access to the LightCycler® 96 Application Software startup wizard. For detailed information, see section [Startup wizard](#), on page 90.

## Help menu

The *Help* menu provides access to the following information:

| Command                 | Description                                                                                                          |
|-------------------------|----------------------------------------------------------------------------------------------------------------------|
| <i>Operator's Guide</i> | Shortcut to the LightCycler® 96 System Guides in the installation folder.                                            |
| <i>About</i>            | Opens the <i>About</i> dialog box, which displays the software version and copyright information about the software. |

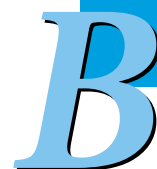

### 1.3.2 Tool bar

The icons in the tool bar provide quick access to the following functions:

| Icon                                                                                | Function                     | Description                                                                                                                                                                                                                                                                                                                                                                                                                                                                                      |
|-------------------------------------------------------------------------------------|------------------------------|--------------------------------------------------------------------------------------------------------------------------------------------------------------------------------------------------------------------------------------------------------------------------------------------------------------------------------------------------------------------------------------------------------------------------------------------------------------------------------------------------|
|    | New Experiment               | Creates a new, empty experiment. For detailed information, see section <a href="#">To generate a new experiment</a> , on page 113.                                                                                                                                                                                                                                                                                                                                                               |
|    | New Experiment from Existing | Opens the <i>Open</i> dialog box for choosing an existing experiment to be used as a template. For detailed information, see section <a href="#">To use an existing experiment as a template</a> , on page 114.                                                                                                                                                                                                                                                                                  |
|    | Open Experiment              | Opens the <i>Open</i> dialog box for choosing an experiment. For detailed information, see section <a href="#">To use a Roche template</a> , on page 114.                                                                                                                                                                                                                                                                                                                                        |
|    | Save Experiment              | Only available if an experiment is opened:<br>Saves the current experiment to its associated file. For detailed information, see section <a href="#">To save an experiment</a> , on page 116.                                                                                                                                                                                                                                                                                                    |
|    | Close Experiment             | Only available if an experiment is opened:<br>Closes the current experiment file. The operator is prompted to save unsaved data before the experiment is closed.                                                                                                                                                                                                                                                                                                                                 |
|    | Properties                   | Only available if an experiment is opened:<br>Opens the <i>Properties</i> dialog box displaying the experiment summary. For detailed information, see section <a href="#">Experiment properties</a> , on page 117.                                                                                                                                                                                                                                                                               |
|  | Show Startup Wizard          | Opens the LightCycler® 96 Application Software startup wizard. For detailed information, see section <a href="#">Startup wizard</a> , on page 90.                                                                                                                                                                                                                                                                                                                                                |
|  | Reports                      | Opens the <i>Reports</i> dialog box for generating an HTML report of the experiment. For detailed information, see section <a href="#">Experiment report</a> , on page 118.                                                                                                                                                                                                                                                                                                                      |
|  | Undo                         | Only displayed if the <i>Sample Editor</i> tab is opened, because undoing is only possible on this tab:<br>Allows you to undo the last five steps.                                                                                                                                                                                                                                                                                                                                               |
|  | Add Analysis                 | Only displayed if the <i>Analysis</i> tab is opened:<br>Opens the <i>Create New Analysis</i> dialog box to select a new analysis and edit the name of the corresponding tab. For detailed information, see section <a href="#">Adding a new analysis</a> , on page 164.                                                                                                                                                                                                                          |
|  | Analysis Settings            | Only displayed if the <i>Analysis</i> tab is opened and at least one analysis is defined:<br>Opens the <i>&lt;analysis&gt; Settings</i> dialog box for specifying the analysis-specific settings. For detailed information, see the descriptions of the corresponding analysis tabs.<br> <i>Changing the analysis settings invalidates the results and causes an automatic recalculation to be performed.</i> |
|  | Delete Analysis              | Only displayed if the <i>Analysis</i> tab is opened and at least one analysis is defined:<br>Removes the analysis from the experiment.                                                                                                                                                                                                                                                                                                                                                           |

### 1.3.3 Working window area tabs

The LightCycler® 96 Application Software provides the complete workflow via the tabs in the working window area of the experiment:

| Tab                  | Description                                                                                                                                                                                                                                                                                                               |
|----------------------|---------------------------------------------------------------------------------------------------------------------------------------------------------------------------------------------------------------------------------------------------------------------------------------------------------------------------|
| <i>Run Editor</i>    | Provides the following functions: <ul style="list-style-type: none"> <li>▶ Defining the detection format and dye settings for the experiment.</li> <li>▶ Defining the temperature and cycling sequence for the experiment.</li> </ul> For detailed information, see section <a href="#">Run Editor tab</a> , on page 135. |
| <i>Sample Editor</i> | Provides the following functions: <ul style="list-style-type: none"> <li>▶ Defining sample and gene names.</li> <li>▶ Defining the sample types.</li> </ul> For detailed information, see section <a href="#">Sample Editor tab</a> , on page 143.                                                                        |
| <i>Raw Data</i>      | Provides the raw data collected during an experiment run. For detailed information, see section <a href="#">Raw Data tab</a> , on page 159.                                                                                                                                                                               |
| <i>Analysis</i>      | Provides the functions and methods for analyzing the results of an experiment run. For detailed information, see section <a href="#">Analysis tab</a> , on page 162.                                                                                                                                                      |

### 1.3.4 Experiment bar

The experiment bar provides an entry for each open experiment. Choosing one of these entries displays the last opened tab for the corresponding experiment.

Each entry in the experiment bar provides a tooltip showing the location where the experiment file is stored. The tooltip for a new experiment shows the default name for new experiments.

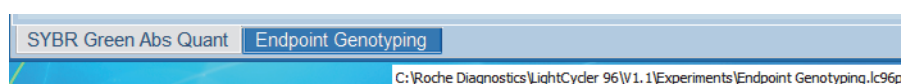

Figure 28: Experiment bar

## 1.4 General software conventions

### 1.4.1 Regional settings

The LightCycler® 96 Application Software user interface displays date and floating-point numbers in English (USA) specified by the Microsoft Windows Regional and Language Options.

### 1.4.2 Buttons

#### Button design

In the LightCycler® 96 Application Software user interface, general button design conventions illustrate the function of each button using specific button indicators:

| Button                                                                             | Marking                                      | Description                                        |
|------------------------------------------------------------------------------------|----------------------------------------------|----------------------------------------------------|
| 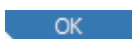  | White triangle in bottom left corner         | Completes the action and closes the dialog.        |
|   | White triangle in top right corner           | Opens a secondary dialog.                          |
|   | No triangle                                  | Performs a specified action in the current dialog. |
|  | White border, label gray, button transparent | Button is disabled.                                |

#### Standard buttons

The LightCycler® 96 Application Software user interface uses the following standard buttons in dialog boxes:

| Button        | Description                                                                                                                                                                                                                                                                             |
|---------------|-----------------------------------------------------------------------------------------------------------------------------------------------------------------------------------------------------------------------------------------------------------------------------------------|
| <i>OK</i>     | Closes the dialog box and applies the settings to the corresponding parameters.                                                                                                                                                                                                         |
| <i>Apply</i>  | Applies the settings to the corresponding parameters without closing the dialog box.                                                                                                                                                                                                    |
| <i>Cancel</i> | Closes the dialog box and discards the settings.                                                                                                                                                                                                                                        |
| ...           | Browse button: <ul style="list-style-type: none"> <li>▶ Opens a <i>Browse For Folder</i> dialog box, where the operator can navigate to a specific location.</li> <li>▶ Opens a text input dialog box, where the operator can enter text, for example, to describe a sample.</li> </ul> |

### 1.4.3 Input fields

The LightCycler® 96 Application Software user interface provides several options for entering data into input fields:

| Input Field                                  | Description                                                                                                                                  |
|----------------------------------------------|----------------------------------------------------------------------------------------------------------------------------------------------|
| Text field                                   | Choose the field and type the text according to the rules specified for the parameter. You can enter up to 100 characters in an input field. |
| Text field with a list                       | Choose the field and select a value from the pull-down list.                                                                                 |
| Numeric values field with up and down arrows | Choose the field and specify a value by choosing the up and down arrows or enter the value directly.                                         |

### 1.4.4 Working with tables

The LightCycler® 96 Application Software provides functions to be used in all tables displayed in the user interface. This section describes functions that are shared between multiple different tables.

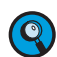

Several functions allow for changing the display of a table, for example, hiding or showing columns. This customized view of a table is saved to the experiment file. When loading an experiment file, the customized window configuration is displayed automatically.

#### Table header shortcut menu

The table header shortcut menu provides access to most of the table functions. The shortcut menu opens with a right-click on the table header.

| Color | Position | Sample Name | Gene Name | Condition Name | Cq    | Cq Mean | Cq Error | Excluded | Sample Type      | Sample Type RQ | Gene Type | Condition Type   |
|-------|----------|-------------|-----------|----------------|-------|---------|----------|----------|------------------|----------------|-----------|------------------|
| A1    |          | Sample 1    | Gene 1    |                |       | 26.13   | 0.09     |          | Unknown          | Unknown        | Target    | Study Calibrator |
| A2    |          | Sample 2    | Gene 1    |                |       | 25.48   | 0.06     |          | Unknown          | Unknown        | Target    | Study Calibrator |
| A3    |          | Sample 3    | Gene 1    |                |       | 24.33   | 0.03     |          | Unknown          | Unknown        | Target    | Study Calibrator |
| A4    |          | Sample 1    | Gene 1    |                |       | 25.90   | 0.12     |          | Unknown          | Unknown        | Target    | Unknown          |
| A5    |          | Sample 2    | Gene 1    |                |       | 25.48   | 0.21     |          | Unknown          | Unknown        | Target    | Unknown          |
| A6    |          | Sample 3    | Gene 1    |                |       | 24.62   | 0.00     |          | Unknown          | Unknown        | Target    | Unknown          |
| A7    |          | Sample 1    | Gene 1    |                |       | 27.00   | 0.04     |          | Unknown          | Unknown        | Target    | Unknown          |
| A8    |          | Sample 2    | Gene 1    |                |       | 24.00   | 0.05     |          | Unknown          | Unknown        | Target    | Unknown          |
| A9    |          | Sample 3    | Gene 1    |                |       | 23.41   | 0.02     |          | Unknown          | Unknown        | Target    | Unknown          |
| A10   |          | NTC         | Gene 1    |                |       | -       | -        |          | Negative control | Unknown        | Target    | Unknown          |
| B1    |          | Sample 1    | Gene 1    |                |       | 26.13   | 0.09     |          | Unknown          | Unknown        | Target    | Study Calibrator |
| B2    |          | Sample 2    | Gene 1    |                |       | 25.48   | 0.06     |          | Unknown          | Unknown        | Target    | Study Calibrator |
| B3    |          | Sample 3    | Gene 1    |                |       | 24.33   | 0.03     |          | Unknown          | Unknown        | Target    | Study Calibrator |
| B4    |          | Sample 1    | Gene 1    | 0 h            | 24.31 | 24.33   | 0.03     |          | Unknown          | Unknown        | Target    | Study Calibrator |
| B5    |          | Sample 1    | Gene 1    | 1 h            | 25.98 | 25.90   | 0.12     |          | Unknown          | Unknown        | Target    | Unknown          |
| B6    |          | Sample 2    | Gene 1    | 1 h            | 25.33 | 25.48   | 0.21     |          | Unknown          | Unknown        | Target    | Unknown          |
|       |          |             |           | 1 h            | 24.62 | 24.62   | 0.00     |          | Unknown          | Unknown        | Target    | Unknown          |

Figure 29: Table header shortcut menu

| Color                        | Position | Sample Name | Gene Name | Condition Name | Cq    | Cq Mean | Cq Error | Excluded | Sample Type      | Sample Type RQ | Gene Type | Condition Type   | Replicate Group |
|------------------------------|----------|-------------|-----------|----------------|-------|---------|----------|----------|------------------|----------------|-----------|------------------|-----------------|
| <b>Sample Name: NTC</b>      |          |             |           |                |       |         |          |          |                  |                |           |                  |                 |
| A10                          |          | Gene 1      |           |                | -     | -       | -        |          | Negative control | Unknown        | Target    | Unknown          | A10             |
| B10                          |          | Gene 1      |           |                | -     | -       | -        |          | Negative control | Unknown        | Target    | Unknown          | A10             |
| C10                          |          | Ref 1       |           |                | -     | -       | -        |          | Negative control | Unknown        | Reference | Unknown          | C10             |
| D10                          |          | Ref 1       |           |                | -     | -       | -        |          | Negative control | Unknown        | Reference | Unknown          | C10             |
| <b>Sample Name: Sample 1</b> |          |             |           |                |       |         |          |          |                  |                |           |                  |                 |
| A1                           |          | Gene 1      |           |                | 26.13 | 0.09    |          |          | Unknown          | Unknown        | Target    | Study Calibrator | A1              |
| A4                           |          | Gene 1      |           |                | 25.90 | 0.12    |          |          | Unknown          | Unknown        | Target    | Unknown          | A4              |
| A7                           |          | Gene 1      |           |                | 27.00 | 0.04    |          |          | Unknown          | Unknown        | Target    | Unknown          | A7              |
| B1                           |          | Gene 1      |           |                | 26.13 | 0.09    |          |          | Unknown          | Unknown        | Target    | Study Calibrator | A1              |
| B4                           |          | Gene 1      |           |                | 25.90 | 0.12    |          |          | Unknown          | Unknown        | Target    | Unknown          | A4              |
| B7                           |          | Gene 1      |           |                | 27.00 | 0.04    |          |          | Unknown          | Unknown        | Target    | Unknown          | A7              |
| C1                           |          | Ref 1       |           | 0 h            | 19.98 | 19.97   | 0.02     |          | Unknown          | Unknown        | Reference | Study Calibrator | C1              |
| C4                           |          | Ref 1       |           | 1 h            | 20.13 | 20.15   | 0.02     |          | Unknown          | Unknown        | Reference | Unknown          | C4              |
| C7                           |          | Ref 1       |           | 2 h            | 22.20 | 22.21   | 0.01     |          | Unknown          | Unknown        | Reference | Unknown          | C7              |
| D1                           |          | Ref 1       |           | 0 h            | 19.95 | 19.97   | 0.02     |          | Unknown          | Unknown        | Reference | Study Calibrator | C1              |
| D4                           |          | Ref 1       |           | 1 h            | 20.16 | 20.15   | 0.02     |          | Unknown          | Unknown        | Reference | Unknown          | C4              |
| D7                           |          | Ref 1       |           | 2 h            | 22.22 | 22.21   | 0.01     |          | Unknown          | Unknown        | Reference | Unknown          | C7              |
| <b>Sample Name: Sample 2</b> |          |             |           |                |       |         |          |          |                  |                |           |                  |                 |
| A2                           |          | Gene 1      |           | 0 h            | 25.52 | 25.48   | 0.06     |          | Unknown          | Unknown        | Target    | Study Calibrator | A2              |
| A5                           |          | Gene 1      |           | 1 h            | 25.62 | 25.48   | 0.21     |          | Unknown          | Unknown        | Target    | Unknown          | A5              |
| A8                           |          | Gene 1      |           | 2 h            | 24.03 | 24.00   | 0.05     |          | Unknown          | Unknown        | Target    | Unknown          | A8              |
| B2                           |          | Gene 1      |           | 0 h            | 25.43 | 25.48   | 0.06     |          | Unknown          | Unknown        | Target    | Study Calibrator | A2              |

Figure 30: Table with grouped rows

| Command                                       | Description                                                                                                                                                                                                                                                                                                                                                                                                                                                                                                                                                                                                                               |
|-----------------------------------------------|-------------------------------------------------------------------------------------------------------------------------------------------------------------------------------------------------------------------------------------------------------------------------------------------------------------------------------------------------------------------------------------------------------------------------------------------------------------------------------------------------------------------------------------------------------------------------------------------------------------------------------------------|
| <i>Sort Ascending/<br/>Sort Descending</i>    | Sorts the corresponding column.                                                                                                                                                                                                                                                                                                                                                                                                                                                                                                                                                                                                           |
| <i>Clear Sorting</i>                          | Resets the row order to the default value.                                                                                                                                                                                                                                                                                                                                                                                                                                                                                                                                                                                                |
| <i>Group By This Column</i>                   | Allows for grouping the values in a table by one or more selected columns; see <a href="#">Figure 30</a> , above.                                                                                                                                                                                                                                                                                                                                                                                                                                                                                                                         |
| <i>Show Group By Box</i>                      | <p>Shows the header of the column(s) selected with <i>Group By This Column</i> in a box above the table header.</p> <p>Using the shortcut menu in this <i>&lt;column&gt;</i> box, the rows in the grouped table can be rearranged as follows:</p> <ul style="list-style-type: none"> <li>▶ <i>Full Expand</i><br/>Expands all rows in the table to show the values in the other columns.</li> <li>▶ <i>Full Collapse</i><br/>Collapses all rows in the table to hide the values.</li> <li>▶ <i>Ungroup</i><br/>Undoes the grouping of the columns.</li> <li>▶ <i>Hide Group By Box</i><br/>Hide the <i>&lt;column&gt;</i> box.</li> </ul> |
| <i>Hide This Column/<br/>Show This Column</i> | Hides/shows the selected column.                                                                                                                                                                                                                                                                                                                                                                                                                                                                                                                                                                                                          |
| <i>Column Selector</i>                        | Opens the <i>Column Selector</i> dialog box which lists the removed columns. For detailed information on the column selector, see section <a href="#">Hiding or showing columns</a> , on page 103.                                                                                                                                                                                                                                                                                                                                                                                                                                        |
| <i>Best Fit</i>                               | Changes the column width to the best fit for the selected column.                                                                                                                                                                                                                                                                                                                                                                                                                                                                                                                                                                         |
| <i>Best Fit (all columns)</i>                 | Changes the column width to the best fit for all columns.                                                                                                                                                                                                                                                                                                                                                                                                                                                                                                                                                                                 |
| <i>Clear Filter</i>                           | Resets the filter specified for the column to the default value.                                                                                                                                                                                                                                                                                                                                                                                                                                                                                                                                                                          |
| <i>Filter Editor</i>                          | Displays the <i>Filter Builder</i> dialog box. For detailed information on specifying filters, see section <a href="#">Filtering table items</a> , on page 104.                                                                                                                                                                                                                                                                                                                                                                                                                                                                           |

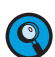

The commands are disabled if the function is not allowed in the current context.

## Table shortcut menu

The tables on the *Raw Data* tab and the *Analysis* tab additionally provide the table shortcut menu, which offers functions affecting one or more selected table items. The table shortcut menu opens with a right-click on a selected item or a range of selected items. For detailed information on selecting table items, see section [To select and deselect items](#), on page 101.



| Color | Position | Sample Name | Gene Name | Condition Name | Cq    | Cq Mean | Cq Error | Excluded | Sample Type      | Sample Type RQ | Gene Type | Condition Type   |
|-------|----------|-------------|-----------|----------------|-------|---------|----------|----------|------------------|----------------|-----------|------------------|
| A1    |          | Sample 1    | Gene 1    | 0 h            | 26.19 | 26.13   | 0.09     |          | Unknown          | Unknown        | Target    | Study Calibrator |
| A2    |          | Sample 2    | Gene 1    |                | 25.52 | 25.48   | 0.06     |          | Unknown          | Unknown        | Target    | Study Calibrator |
| A3    |          | Sample 3    | Gene 1    |                | 24.35 | 24.33   | 0.03     |          | Unknown          | Unknown        | Target    | Study Calibrator |
| A4    |          | Sample 1    | Gene 1    |                | 25.81 | 25.90   | 0.12     |          | Unknown          | Unknown        | Target    | Unknown          |
| A5    |          | Sample 2    | Gene 1    |                | 25.62 | 25.48   | 0.21     |          | Unknown          | Unknown        | Target    | Unknown          |
| A6    |          | Sample 3    | Gene 1    |                | 24.62 | 24.62   | 0.00     |          | Unknown          | Unknown        | Target    | Unknown          |
| A7    |          | Sample 1    | Gene 1    |                | 26.97 | 27.00   | 0.04     |          | Unknown          | Unknown        | Target    | Unknown          |
| A8    |          | Sample 2    | Gene 1    |                | 24.03 | 24.00   | 0.05     |          | Unknown          | Unknown        | Target    | Unknown          |
| A9    |          | Sample 3    | Gene 1    |                | 23.42 | 23.41   | 0.02     |          | Unknown          | Unknown        | Target    | Unknown          |
| A10   |          | NTC         | Gene 1    |                | -     | -       | -        |          | Negative control | Unknown        | Target    | Unknown          |
| B1    |          | Sample 1    | Gene 1    | 0 h            | 26.06 | 26.13   | 0.09     |          | Unknown          | Unknown        | Target    | Study Calibrator |

Figure 31: Table shortcut menu

| Command                     | Description                                                                                                                                                                                                                                                                                                                                                                                                                                                                                                                                                     |
|-----------------------------|-----------------------------------------------------------------------------------------------------------------------------------------------------------------------------------------------------------------------------------------------------------------------------------------------------------------------------------------------------------------------------------------------------------------------------------------------------------------------------------------------------------------------------------------------------------------|
| <i>Color</i>                | Opens the color selection dialog box. For detailed information, see section <a href="#">Editing cells</a> , on page 102.                                                                                                                                                                                                                                                                                                                                                                                                                                        |
| <i>Reset Color</i>          | Resets the color to the default value.                                                                                                                                                                                                                                                                                                                                                                                                                                                                                                                          |
| <i>Include/Exclude</i>      | Not available for high resolution melting analysis:<br>Includes/excludes the corresponding sample in/from the analysis.<br><br>By default, all samples are included, so all samples are deselected in the <i>Excluded</i> column. Excluding samples can be useful when a sample is clearly an outlier, or if an error has occurred in pipetting or amplification. Excluded samples are still displayed and can be selected in all analysis instances, such as tables and charts, but do not show any result values, for example, Cq's, ratios, and group calls. |
| <i>Add/Remove Positions</i> | Only available for high resolution melting analysis:<br>Adds/removes the position to/from the analysis.<br><br>Removed positions are no longer displayed in tables and charts of the corresponding analysis.                                                                                                                                                                                                                                                                                                                                                    |
| <i>Export to File</i>       | Opens the <i>Save As</i> dialog and saves the corresponding table data including the header line to the specified location. for detailed information, see section <a href="#">Exporting the result table</a> , on page 218.<br><br>The data are saved as a text file (*.txt) in table format.                                                                                                                                                                                                                                                                   |
| <i>Copy</i>                 | Copies the current selection including the header line to the clipboard for pasting into other applications, for example, Microsoft Excel.                                                                                                                                                                                                                                                                                                                                                                                                                      |

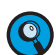

The commands are disabled if the function is not allowed in the current context.

## To select and deselect items

- 1 Choose a row in a table to select the corresponding item. The selected items are highlighted.
- 2 To add or remove rows from the selection, use the [Shift] key and [Ctrl] key on your keyboard.
- 3 To select all rows in a table, choose the table and press [Ctrl] + [a] on your keyboard.

## Editing cells

Tables often allow direct editing of the contents of individual cells. Different types of cells respond slightly differently to editing:

| Cell Type       | Editing                                                                                                                                                                                                                                                                                                                                                                                                                                                                                                                                                                                              |
|-----------------|------------------------------------------------------------------------------------------------------------------------------------------------------------------------------------------------------------------------------------------------------------------------------------------------------------------------------------------------------------------------------------------------------------------------------------------------------------------------------------------------------------------------------------------------------------------------------------------------------|
| Text or numbers | <p>To enable editing:</p> <ul style="list-style-type: none"> <li>▶ Double-click in the cell. Edit the contents in the displayed input field.</li> <li>▶ Select the cell (by choosing the cell or using arrow keys) and start typing.</li> </ul> <p>To stop editing:</p> <ul style="list-style-type: none"> <li>▶ Press the [Enter] key to complete the change and start editing the next cell below.</li> <li>▶ Press the [Tab] key to complete the change and start editing the next cell to the right.</li> <li>▶ Click outside the cell to complete the change and stop editing cells.</li> </ul> |
| Boolean value   | <ul style="list-style-type: none"> <li>▶ Choose the cell to toggle the value.</li> <li>▶ If the cell is selected, press any key to toggle the value.</li> </ul>                                                                                                                                                                                                                                                                                                                                                                                                                                      |
| Color           | <ul style="list-style-type: none"> <li>▶ Select the cell. The color selection dialog box opens.</li> <li>▶ Choose a color in the color palette.</li> </ul>                                                                                                                                                                                                                                                                                                                                                                                                                                           |
| Choice          | <ul style="list-style-type: none"> <li>▶ Choose the cell and select an entry from the list displayed.</li> </ul>                                                                                                                                                                                                                                                                                                                                                                                                                                                                                     |

## To sort tables

- 1 Choose the header of a column to sort the table by the column values.  
Choosing the header several times toggles the sort order between descending and ascending.  

*In a 'Position' column, showing the position of a sample on the multiwell plate, choosing the header toggles between sorting by row (A1, A2, A3, ...) or sorting by column (A1, B1, C1, ...).  
Choosing the header of the 'Number' column allows for sorting a table upwards or downwards.*
- 2 To sort the table by multiple columns, press the [Ctrl] key and choose the headers of the columns to be included in the sort. Start from the least significant column and proceed through to the most significant column.

## To change the column width

- 1 Move the cursor to the border of the table header you want to change.
- 2 When the cursor changes to a left and right arrow, hold down the left mouse button and drag the border until the column has the appropriate width.

## Hiding or showing columns

Operators can hide or show columns of a table using the *Column Selector* dialog box.

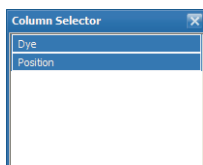

Figure 32: Column Selector dialog box

The dialog box lists all hidden columns (that is, all columns removed from the table).

### To hide a column

- 1 Right-click the header of the column you want to hide.
- 2 On the table header shortcut menu, choose *Hide This Column*.

Alternatively, you can drag and drop a column to the *Column Selector* dialog box.

- 1 On the table header shortcut menu, choose *Column Selector*.  
The *Column Selector* dialog box opens in the bottom right corner of the table.
- 2 Choose the header of the column you want to hide.
- 3 Drag the column into the *Column Selector* dialog box.

### To show a column

- 1 On the table header shortcut menu, choose *Column Selector*.  
The *Column Selector* dialog box opens in the bottom right corner of the table.
- 2 Perform one of the following steps:
  - ▶ Double-click the column you want to show.
  - ▶ Right-click the column you want to show and choose *Show This Column* on the shortcut menu.
  - ▶ Choose the column you want to show and drag it back to the table header.

## Filtering table items

Operators can filter items in a table to reduce the number of displayed rows by the values in specified columns.

When a filter is active, the filter control bar is displayed below the table. This bar allows for quick switching between filter conditions and enabling/disabling filters.

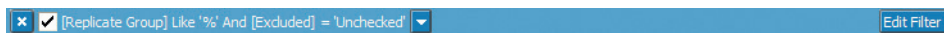

Figure 33: Filter control bar

### To filter table items with the filter icon

- 1 Choose the filter icon  in the header of the corresponding column.  
 The filter icon is only displayed if filtering is supported for the table.  
 A list with all values found in this column and the category (custom) is displayed.
- 2 Perform one of the following steps:
  - ▶ Choose one of the values in this list.
  - ▶ Choose the category (custom).  
 The *Custom Autofilter* dialog box is displayed. The *Custom Autofilter* function allows you to combine two values for filtering.
 The table is updated and the filter definition is displayed below.
- 3 Repeat these steps to add additional values to the filter definition.  
 The items are filtered by these values. Only items matching all the filter conditions are displayed and selected in the table.

### Filtering table items with the Filter Editor

Alternatively, you can filter the items using the appropriate expressions which you create with the *Filter Editor* function:

Logical link between filter conditions

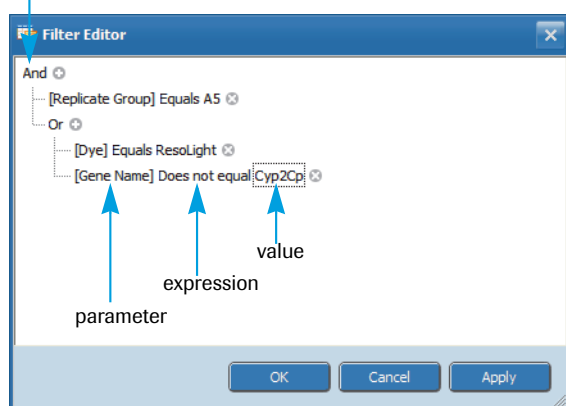

Figure 34: Filter Editor dialog box

## To filter table items with the Filter Editor

- 1 Perform one of the following steps:
  - ▶ Filter the items as described above and choose *Edit Filter*.
  -  The 'Edit Filter' button is only displayed after you have specified a column filter setting.
  - ▶ Right-click the column header and choose *Filter Editor* on the shortcut menu.

The *Filter Editor* dialog box is displayed, see above.
- 2 Choose the *<logical link>* field and choose the appropriate expression from the pull-down list.
  -  The 'Add Group' function in this list allows a different logical link between conditions within a group and between groups of conditions.
- 3 Choose the + symbol to add a filter expression.
- 4 Choose the *<parameter>* field and choose the corresponding parameter from the pull-down list.
- 5 Choose *<expression>* and choose the appropriate expression from the pull-down list.
- 6 Choose the *<value>* field and type the necessary value.
- 7 Perform one of the following steps:
  - ▶ Choose *Apply* to filter the samples via the specified expression. The *Filter Builder* dialog box remains open.
  - ▶ Choose *OK* to filter the samples via the specified expression and close the *Filter Builder* dialog box.

The table is updated and the filter definition is displayed below.

B

### 1.4.5 Working with graphs

This section describes functions that are shared between multiple different graphs (in this example, an amplification curves graph is shown).

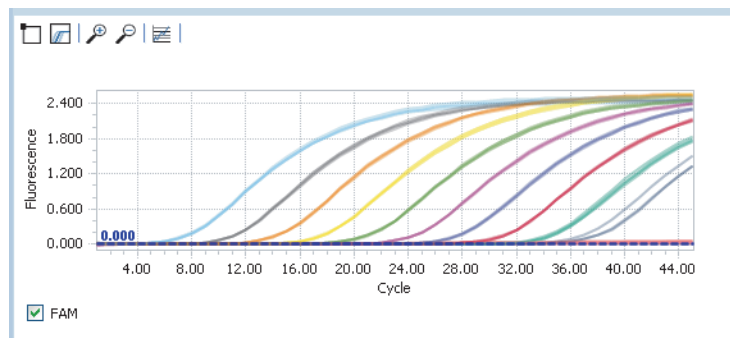

Figure 35: Graphs window area

As selection, zooming, and marking share the same mouse actions, the operator must indicate which function will follow. Graphs in the software have several common tools to manage the display:

| Icon | Function       | Usage                                                                                                                                                                                                                                                                                                                                                                                                                                                                                                                                                                                                                                                                                                                                                                                                                                                                                                                                    |
|------|----------------|------------------------------------------------------------------------------------------------------------------------------------------------------------------------------------------------------------------------------------------------------------------------------------------------------------------------------------------------------------------------------------------------------------------------------------------------------------------------------------------------------------------------------------------------------------------------------------------------------------------------------------------------------------------------------------------------------------------------------------------------------------------------------------------------------------------------------------------------------------------------------------------------------------------------------------------|
|      | Selection      | <ul style="list-style-type: none"> <li>▶ Choose the icon to select it.</li> <li>▶ Move the cursor over the graph window area, to the left of the curves you wish to select.</li> <li>▶ Hold down the left mouse button and drag the cursor to a point in the middle of the curves. As you drag the cursor, a box will show the window area where curves will be selected.</li> <li>▶ Release the mouse button to make the selection. All curves which pass through the box will be selected, and other curves will be deselected. The selected curves are displayed bold.</li> </ul>                                                                                                                                                                                                                                                                                                                                                     |
|      | Show Selection | Choose this icon to show only the selected curves.                                                                                                                                                                                                                                                                                                                                                                                                                                                                                                                                                                                                                                                                                                                                                                                                                                                                                       |
|      | Hide Selection | Only displayed in normalized melting curves, normalized melting peaks and difference plot charts for high resolution melting analyses:<br>Choose this icon to hide the selected curves.                                                                                                                                                                                                                                                                                                                                                                                                                                                                                                                                                                                                                                                                                                                                                  |
|      | Area Marker    | <p>Only displayed in melting peaks graphs:</p> <ul style="list-style-type: none"> <li>▶ Choose the icon to indicate that a marking action will follow.</li> <li>▶ Move the cursor over the graph window area to the point for the top left corner of the area.</li> <li>▶ Hold down the left mouse button and drag the cursor to the point for the bottom right corner of the area.</li> <li>▶ Release the mouse button.</li> <li>▶ To change the size of the specified area, select the corresponding side or corner of the rectangle, and drag it accordingly.</li> </ul> <p> <i>The LightCycler® 96 Application Software allows five areas to be defined in one graph. To specify an additional area, one of the existing areas must be deleted. For detailed information, see section <a href="#">T<sub>m</sub> calling</a>, on page 200.</i></p> |
|      | Zoom           | <ul style="list-style-type: none"> <li>▶ Choose the icon to zoom into the graph.</li> <li>▶ Move the cursor to the top left of the area you wish to zoom to.</li> <li>▶ Hold down the left mouse button and move the cursor to the bottom right of the graph you wish to zoom into. As you drag the cursor, a box will show the graph that will be zoomed into.</li> <li>▶ Release the mouse button to make the selection. The graph will now have axes set to display the selected window area.</li> </ul>                                                                                                                                                                                                                                                                                                                                                                                                                              |

| Icon | Function                     | Usage                                                                                                                                                                                                                                                                                                                                                                                                                                                                                                                                                                                                            |
|------|------------------------------|------------------------------------------------------------------------------------------------------------------------------------------------------------------------------------------------------------------------------------------------------------------------------------------------------------------------------------------------------------------------------------------------------------------------------------------------------------------------------------------------------------------------------------------------------------------------------------------------------------------|
|      | Cancel Zoom                  | Choose this icon to zoom out back to normal size.                                                                                                                                                                                                                                                                                                                                                                                                                                                                                                                                                                |
|      | Y Axis Scaling               | Only displayed in curve graphs and relative quantification bar charts: <ul style="list-style-type: none"> <li>▶ Choose the icon to display the <i>Axis Scaling Settings</i> dialog box.</li> <li>▶ Choose <i>Manual</i>.</li> <li>▶ Choose the <i>Maximum</i> and <i>Minimum</i> values for the Y-axis in the corresponding lists.</li> <li>▶ Choose <i>OK</i> to confirm your settings.</li> </ul>                                                                                                                                                                                                              |
|      | Data Visualization           | Only displayed in relative quantification bar charts: <p>Choose the icon to display the <i>Data Visualization</i> dialog box. For detailed information, see section <a href="#">Data Visualization</a>, on page 180.</p>                                                                                                                                                                                                                                                                                                                                                                                         |
|      | Assign Group by Line Segment | Only displayed in normalized melting curves, normalized melting peaks, and difference plot charts: <ul style="list-style-type: none"> <li>▶ Choose the icon to initiate the <i>Assign Group by Line Segment</i> tool.</li> <li>▶ Hold down the left mouse button and draw a line with the mouse to select one or more curves.</li> <li>▶ Release the mouse button.</li> </ul> <p>All curves which pass through the line will be selected and all other curves deselected. The Group Assignment dialog box opens. For detailed information, see section <a href="#">High Resolution Melting</a>, on page 207.</p> |

## Dye selection

Each graph provides options to show only the curves according to the selected dye(s). An option is displayed for each dye assigned in the corresponding detection format. For detailed information on how to define a detection format, see section [Detection Format](#), on page 141.

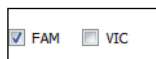

Figure 36: Dye selection in a graph

## Tooltips

Many graphs will display tooltips that provide extra information associated with a curve, such as the position of the sample, etc.

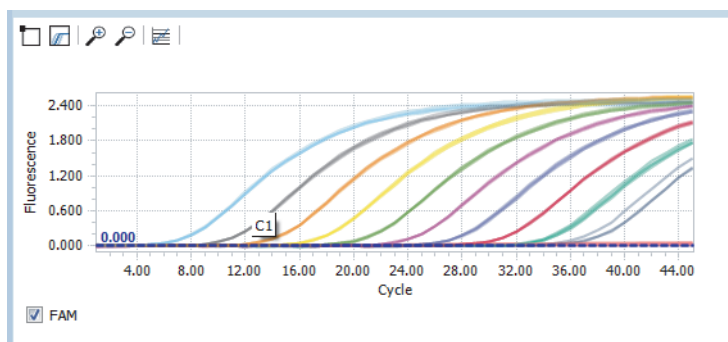

Figure 37: Tooltips in a graph

## To display a tooltip

- 1 Hover the cursor over a curve. A gray box (tooltip) will appear showing the additional information. When a tooltip has appeared, moving the cursor around will continue to display the information associated with the curve nearest to the cursor.
- 2 To stop displaying tooltips, move the cursor away from the curves.

## Graphs shortcut menu

The shortcut menu provides functions for copying and exporting the corresponding graphs.

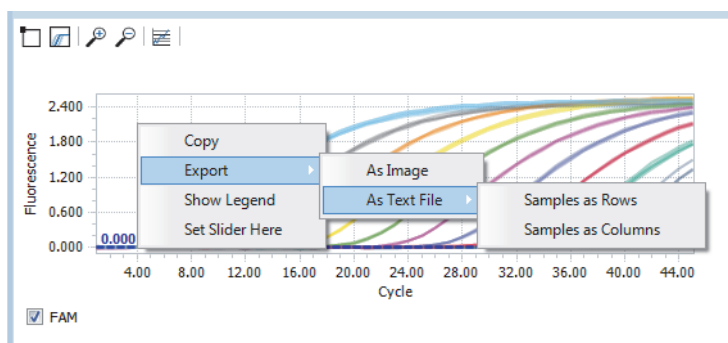

Figure 38: Graphs shortcut menu

| Command                        | Description                                                                                                                                                                                                                                                                                                                                                                                                                                                                                                                                                                                                                                            |
|--------------------------------|--------------------------------------------------------------------------------------------------------------------------------------------------------------------------------------------------------------------------------------------------------------------------------------------------------------------------------------------------------------------------------------------------------------------------------------------------------------------------------------------------------------------------------------------------------------------------------------------------------------------------------------------------------|
| <i>Copy</i>                    | Copies the graph as a picture to the clipboard. You can paste the copied picture into another software program.                                                                                                                                                                                                                                                                                                                                                                                                                                                                                                                                        |
| <i>Export</i>                  | <p>Opens the <i>Save As</i> dialog and saves the data to the specified location. The following commands are available:</p> <ul style="list-style-type: none"> <li>▶ <i>As Image</i><br/>The chart is saved as a PNG file (*.png) or as a GIF file (*.gif), according to your selection.</li> <li>▶ <i>Export As Text File &gt; Samples as Rows</i><br/>The chart data are saved as a text file (*.txt) in table format with the sample name as the row header.</li> <li>▶ <i>Export As Text File &gt; Samples as Columns</i><br/>The chart data are saved as a text file (*.txt) in table format with the sample name as the column header.</li> </ul> |
| <i>Show Legend/Hide Legend</i> | <p>Shows a legend for the graph or hides it:</p> <ul style="list-style-type: none"> <li>▶ In curve graphs:<br/>The legend displays the line style which is used for the corresponding dye.</li> <li>▶ In bar chart graphs:<br/>The legend displays the colors which are used for the corresponding bars.</li> </ul>                                                                                                                                                                                                                                                                                                                                    |
| <i>Set Slider Here</i>         | <p>Only displayed in amplification curves for the EPF value:</p> <p>Specifies the minimum EPF threshold. By default, the slider is set to 0. In this position no EPF threshold is applied. For detailed information on setting thresholds, see section <a href="#">Minimum EPF threshold</a>, on page 169.</p>                                                                                                                                                                                                                                                                                                                                         |

### 1.4.6 Working with heat maps

A heat map shows an image of the multiwell plate used in the experiment for the specified channel or the specified gene. Hovering the cursor over a well will display a tooltip with the properties of the sample (in this example, the *Cq* heat map of an absolute quantification experiment is shown).

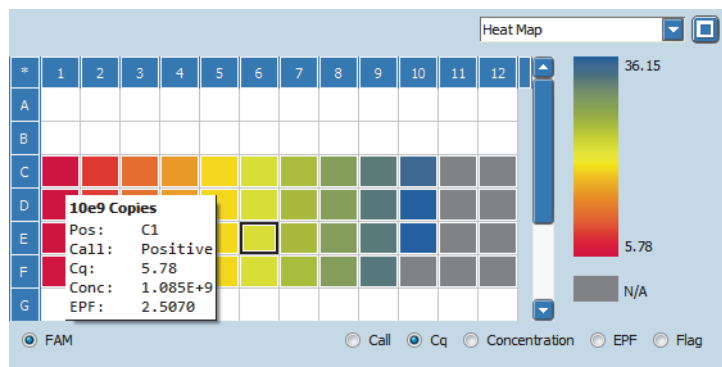

Figure 39: Heat Map window area

Depending on the analysis, each heat map shows options for displaying the values, for example, the dye assigned in the detection format or the call status of the samples. For detailed information, see the descriptions of the corresponding analysis tabs.

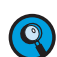

*A heat map only displays the samples contained in the sample list. Samples not in the list (that is, cleared wells, and removed samples and genes) are displayed in white and samples excluded from calculation are displayed in gray.*

### Enlarged heat maps

If enlarged, a heat map also provides the sample name, gene name, and condition name for each sample.

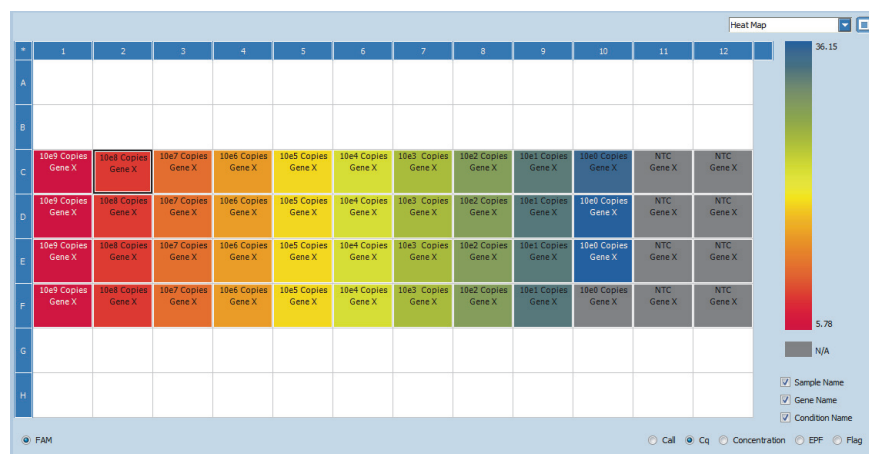

Figure 40: Heat Map window area

### To change the size of a heat map

1

To enlarge a heat map, choose the  button (see section [Working with sections](#), on page 112). The heat map is enlarged to fill the entire working area and the sample name, gene name, and condition name are displayed.

To restore the previous view, choose the icon again.

Heat map shortcut menu

The shortcut menu provides functions for copying and exporting the corresponding heat map.

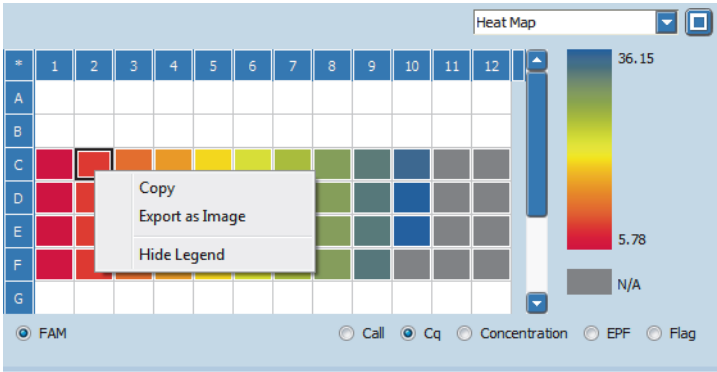

Figure 41: Heat map shortcut menu

| Command                     | Description                                                                                                                                                                      |
|-----------------------------|----------------------------------------------------------------------------------------------------------------------------------------------------------------------------------|
| Copy                        | Copies the heat map as a picture to the clipboard. You can then paste the copied picture into another software program.                                                          |
| Export as Image             | Opens the <i>Save As</i> dialog and saves the data to the specified location. The heat map is saved as a PNG file (*.png) or as a GIF file (*.gif), according to your selection. |
| Show Legend/<br>Hide Legend | Shows or hides a legend to explain the colors used in the heat map.                                                                                                              |

### 1.4.7 Working with plate views

LightCycler® 96 Application Software contains plate views, which reflect the arrangement of samples in the multiwell plate mount of the LightCycler® 96 Instrument (in this example, the plate view on the *Sample Editor* tab is shown):

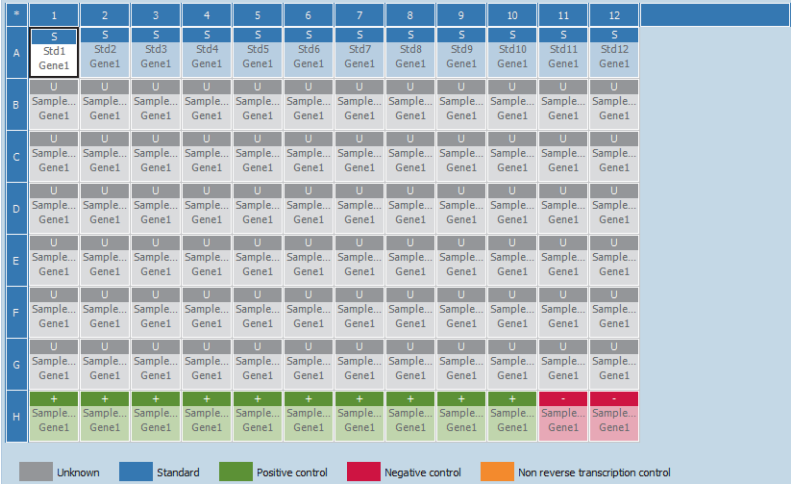

|   | 1               | 2               | 3               | 4               | 5               | 6               | 7               | 8               | 9               | 10              | 11              | 12              |
|---|-----------------|-----------------|-----------------|-----------------|-----------------|-----------------|-----------------|-----------------|-----------------|-----------------|-----------------|-----------------|
| A | Std1 Gene1      | Std2 Gene1      | Std3 Gene1      | Std4 Gene1      | Std5 Gene1      | Std6 Gene1      | Std7 Gene1      | Std8 Gene1      | Std9 Gene1      | Std10 Gene1     | Std11 Gene1     | Std12 Gene1     |
| B | Sample... Gene1 |
| C | Sample... Gene1 |
| D | Sample... Gene1 |
| E | Sample... Gene1 |
| F | Sample... Gene1 |
| G | Sample... Gene1 |
| H | Sample... Gene1 |

Legend: Unknown (grey), Standard (blue), Positive control (green), Negative control (red), Non reverse transcription control (orange)

Figure 42: Plate view

The plate view shows the arrangement of 96 wells in an array of 12 columns and 8 rows. The plate view is marked with the same numbers and letters as found on the LightCycler® 480 Multiwell Plate 96. Each well is displayed as a rectangle, colored according to the sample type of the well.

The LightCycler® 96 Application Software provides functions to be used in all plate views displayed in the user interface.

#### To select and deselect wells

- 1 Choose a well in a plate view to select the corresponding item.  
The selected well is highlighted.
- 2 To add or remove wells from the selection, use the [Shift] key and [Ctrl] key on your keyboard.
- 3 To select all wells in a plate view, perform one of the following steps:
  - ▶ Choose one well and press [Ctrl] + [a] on your keyboard.
  - ▶ Choose the asterisk (\*) in the upper left corner of the plate view.

#### Tooltips

The plate views also display tooltips that provide additional information associated with a well, such as the well position, the sample name, etc.

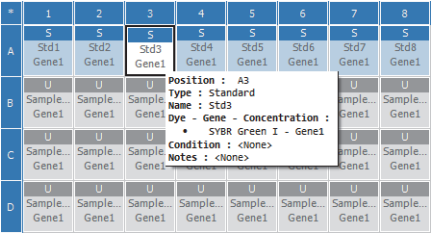

|   | 1               | 2               | 3               | 4               | 5               | 6               | 7               | 8               |
|---|-----------------|-----------------|-----------------|-----------------|-----------------|-----------------|-----------------|-----------------|
| A | Std1 Gene1      | Std2 Gene1      | Std3 Gene1      | Std4 Gene1      | Std5 Gene1      | Std6 Gene1      | Std7 Gene1      | Std8 Gene1      |
| B | Sample... Gene1 |
| C | Sample... Gene1 |
| D | Sample... Gene1 |

Tooltip for A3:  
 Position: A3  
 Type: Standard  
 Name: Std3  
 Dye: SYBR Green I - Gene1  
 Concentration: 100000  
 Condition: <none>  
 Notes: <none>

Figure 43: Tooltips in the plate view

## To display a tooltip

- 1 Hover the cursor over a well. A gray box (tooltip) will appear showing the additional information. When a tooltip has appeared, moving the cursor around will continue to display the information associated with the well nearest to the cursor.
- 2 To stop displaying tooltips, move the cursor away from the wells.

## 1.4.8 Working with sections

The *Raw Data* tab and the *Analysis* tab in the LightCycler® 96 Application Software provide several sections in the working window area. Sections allow the operator to combine different views of the data.

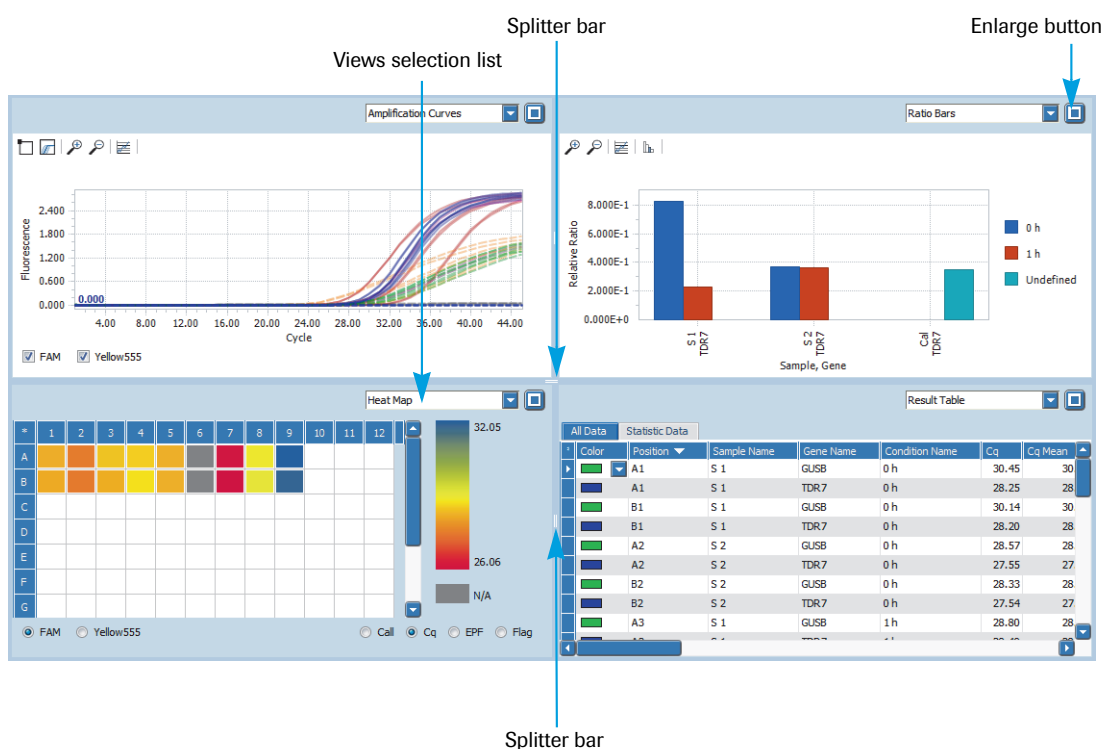

**Figure 44: Sections in the working window area**

By default, the tabs provide four sections. Each section contains a list for choosing the data to be displayed and a button to enlarge the section or restore the previous view. The customized view is saved to the experiment file. When loading an existing experiment file, the customized window configuration is displayed automatically.

## To change the size of a section

- 1 Choose the splitter bar between the corresponding sections and drag it accordingly.

## To enlarge a section

- 1 To enlarge a special section, choose the  button. The section is enlarged to fill the entire working area. To restore the previous view, choose the icon again.

## 1.5 Experiments

The information provided in the experiment definition controls the LightCycler® 96 Instrument during an experiment run. The experiment definition specifies the target temperatures and hold times of the thermal block cycler, the number of cycles being executed, and other parameters.

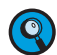

*For starting an experiment run, the experiment must be transferred to the instrument. An experiment run can only be started on the instrument using the LightCycler® 96 Instrument Software. For detailed information on how to send an experiment to the instrument, see section [Instrument Manager](#), on page 124.*

### 1.5.1 Experiment file types

The LightCycler® 96 Application Software supports the following experiment file types:

- ▶ \*.lc96p (LightCycler® 96 experiment files for processed experiments).
- ▶ \*.lc96u (LightCycler® 96 experiment files for unprocessed experiments).
- ▶ \*.lc96 (LightCycler® 96 experiment files generated with LightCycler® 96 Software Version 1.0).
- ▶ \*.rdml (Real-time PCR Data Markup Language files).

By default, all newly generated experiment files have the file type \*.lc96u. Operators can save experiment files as LightCycler® 96 files (\*.lc96p or \*.lc96u) or as RDML files without changing their content.

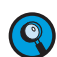

*Aborted experiments are treated identically to processed experiments, that is, they are saved as \*.lc96p files.*

All file types can be opened in the LightCycler® 96 Application Software. To enable opening of LightCycler® 96 experiment files with a third-party RDML-compatible software, the files must be saved as \*.rdml.

### 1.5.2 Creating an experiment

Before a LightCycler® 96 Instrument run can be started, a new experiment has to be created. The operator has the following options for creating a new experiment:

- ▶ Generating a completely new experiment.
- ▶ Generating a new experiment by using an existing experiment as a template.
- ▶ Generating a new experiment by using a predefined Roche template.

#### To generate a new experiment

1

Perform one of the following steps:

- ▶ On the start screen, choose the *Quickstart* tab and then *Create New Experiment*.
- ▶ In the *File* menu, choose *New > Experiment*.
- ▶ In the tool bar, choose the *New Experiment* icon.

The LightCycler® 96 Application Software displays the new experiment in the main window. The new experiment has the default name *New Experiment <creation\_date> <creation\_time>*.

2

Optional: Enter a description of the experiment.

- ▶ In the *File* menu, choose *Properties*.
- ▶ In the *Properties* dialog box, choose the *Notes* tab.
- ▶ Enter a description.
- ▶ Choose *OK*.

For detailed information on the *Properties* dialog box, see section [Experiment properties](#), on page 117.

## To use an existing experiment as a template

To create a new experiment from an existing one (that is, to copy all settings of an experiment), the operator must open the experiment file as a template. In this case, the raw data of the experiment is deleted.

Depending on the file type of the existing experiment, the following settings are provided for editing:

- ▶ If the existing experiment is unprocessed (.lp96u), it only contains the run settings.
- ▶ If the existing experiment is processed (.lp97p), it contains the run settings, the sample editor settings and, possibly, the analysis settings.

- 1 Perform one of the following steps:
  - ▶ On the start screen, choose the *Quickstart* tab and then *Create New Experiment from Existing*.
  - ▶ In the *File* menu, choose *New > Experiment from Existing*.
  - ▶ In the tool bar, choose the *New Experiment from Existing* icon.

The *Open* dialog box opens.

- 2 Navigate to the corresponding directory.  
 *By default, the default experiment directory is displayed. This directory can be specified in the 'Default Directory' dialog box. For detailed information, see section [Preferences](#), on page 134.*

- 3 In the list next to the *File name* field, select the file type to be displayed: \*.lc96, \*.lc96u, or \*.lc96p

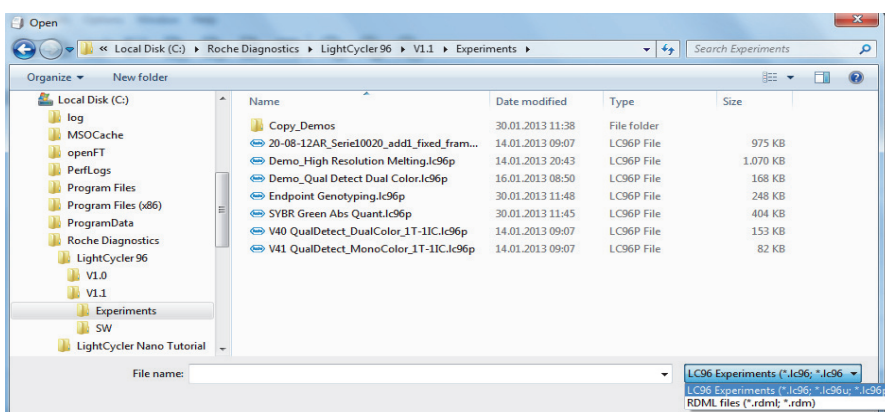

- 4 Select the experiment and choose *Open*. The experiment opens in the main window.
- 5 Change all settings according to your needs.  
 *When detection format settings are changed (for example, the dye type in the same channel), all gene-specific settings (that is, gene name and concentration) are set to their default values.*  
*Changing sample names or gene names might result in non-matching analysis-specific settings (for example, changing the gene name of a reference gene in relative quantification).*

## To use a Roche template

Roche provides a number of predefined experiments as templates. A Roche template represents an experiment file for an unprocessed experiment (.lp96u). It therefore contains the run settings, that is, the temperature profile and the dye-specific parameters. The templates are located in the LightCycler® 96 Application Software home directory.

- 1 Perform one of the following steps:
    - ▶ On the start screen, choose the *Quickstart* tab and then *Create New Experiment from Roche Template*.
    - ▶ In the *File* menu, choose *New > Experiment from Roche Template*.
- The *Experiment from Roche Template* dialog box opens.

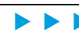

- 2 Select the corresponding template.

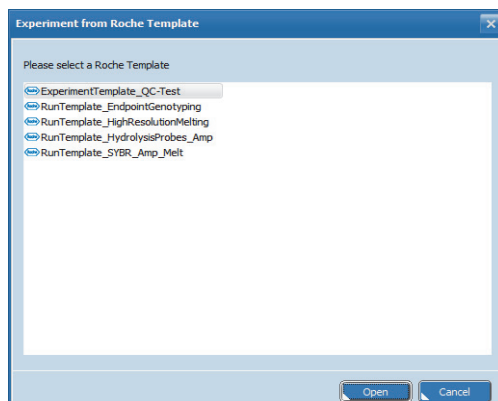

- 3 Choose *Open*. The experiment opens in the main window.
- 4 Change all settings according to your needs.

### 1.5.3 Opening an experiment

Experiments can be saved and reopened at any time during the experiment definition, after the experiment run, or after defining the analysis parameters.

#### To open an experiment

- 1 Perform one of the following steps:
  - ▶ In the startup wizard, choose the *Recent experiments* tab and then the experiment to be displayed. The experiment opens in the main window.
  - ▶ In the *File* menu, choose *Recent Experiments* and then the experiment to be displayed. The experiment opens in the main window.
  - ▶ In the *File* menu, choose *Open*. The *Open* dialog box opens. Proceed with step 2.
  - ▶ In the tool bar, choose the *Open Experiment* icon. The *Open* dialog box opens. Proceed with step 2.
- 2 Navigate to the corresponding directory and select the relevant experiment file.
 

 *By default, the default experiment directory is displayed. This directory can be specified in the 'Default Directory' dialog box. For detailed information, see section [Preferences](#), on page 134.*
- 3 Choose *Open*. The experiment opens in the main window.

### 1.5.4 Saving an experiment

Experiments can be saved at any time during the experiment definition, after the experiment run, or after defining the analysis parameters.

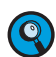

*After the run is finished, you can no longer change any of the run parameters. For detailed information on copying and reusing an existing experiment, see section [To use an existing experiment as a template](#), on page 114.*

#### To save an experiment

- 1 Perform one of the following steps:
  - ▶ In the *File* menu, choose *Save* to save the currently opened experiment. If no file exists, the *Save As* dialog box opens.
  - ▶ In the *File* menu, choose *Save As* to save the experiment to a specified location. The *Save as* dialog box opens.
  - ▶ In the tool bar, choose the *Save Experiment* icon to save the currently opened experiment. If no file exists, the *Save As* dialog box opens.
- 2 Navigate to the directory where you want to store the experiment file.

 *By default, the default experiment directory is displayed. This directory can be specified in the 'Default Directory' dialog box. For detailed information, see section [Preferences](#), on page 134.*
- 3 Enter a file name for the experiment.
- 4 Choose *Save*. The dialog box closes.

The experiment is saved according to the processing:

  - ▶ As a LightCycler® 96 file for an unprocessed experiment (\*.lc96u).
  - ▶ As a LightCycler® 96 file for a processed experiment (\*.lc96p).

 *By default, experiments are saved as LightCycler® 96 files (\*.lc96u or \*.lc96p). The dialog additionally provides an option for saving experiments as RDML files (\*.rdml). Both file types are compatible with the LightCycler® 96 Application Software. To enable opening LightCycler® 96 experiment files with a third-party RDML-compatible software, save the files as \*.rdml.*

B

### 1.5.5 Experiment properties

When an operator creates a new experiment, the LightCycler® 96 Application Software generates the experiment summary. The summary is updated each time the experiment file is saved. The summary is provided in the *Properties* dialog box, which operators access via the *File* menu or the *Properties* icon in the tool bar:

*File > Properties*

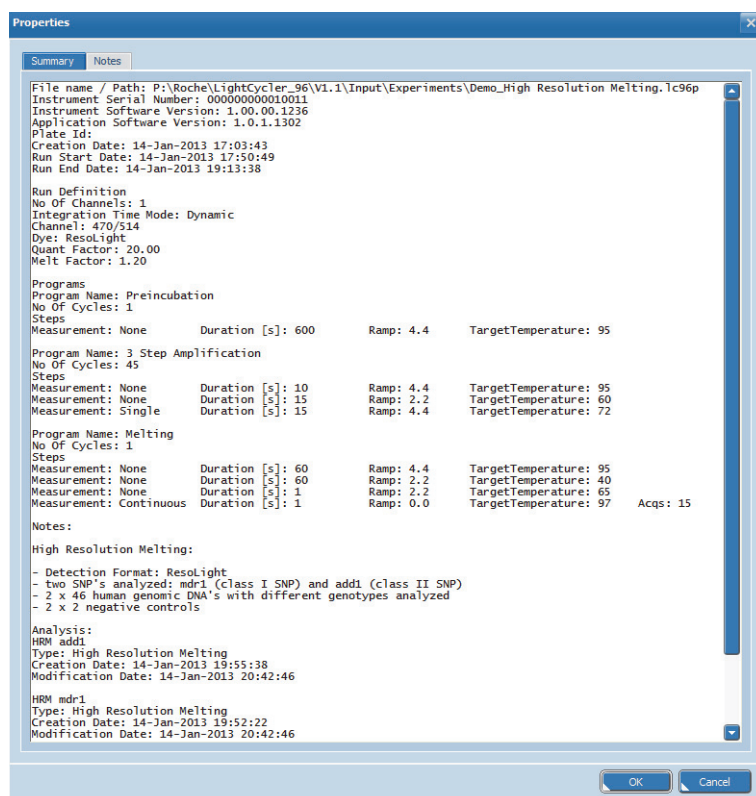

Figure 45: Properties dialog box

#### Summary tab

The experiment summary includes the following information:

- ▶ The file name and path of the experiment. The file name is also displayed in the experiment bar.
- ▶ The LightCycler® 96 Instrument serial number.
- ▶ The LightCycler® 96 Instrument Software version.
- ▶ The LightCycler® 96 Application Software version.
- ▶ The plate ID of the LightCycler® 480 Multiwell Plate 96.
- ▶ The email notification address.
- ▶ The date and time the experiment was created.
- ▶ The start and end date of the experiment run.
- ▶ The measurement settings specified in the run definition.
- ▶ The programs contained in the run definition including the temperature gradient, if specified.
- ▶ The experiment notes.
- ▶ The applied analysis.
- ▶ The date and time the analysis was created or modified.
- ▶ Plate positions with a fluorescence intensity exceeding the dynamic camera range.

## Notes tab

The *Notes* tab is a text input field for up to 10 000 characters in which you can add notes to the experiment if necessary. The notes are saved to the experiment file.

### 1.5.6 Experiment report

The LightCycler® 96 Application Software provides a function to generate an HTML report for each experiment. The report includes all data contained in the experiment file. The report can be displayed in a browser installed on your computer.

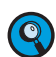

*The HTML report is only validated for Microsoft Windows Internet Explorer 8 and 9. Other browsers or other Internet Explorer versions may fail to display the report information.*

The report is generated in the *Reports* dialog box, which operators access via the *Reports* icon in the tool bar:

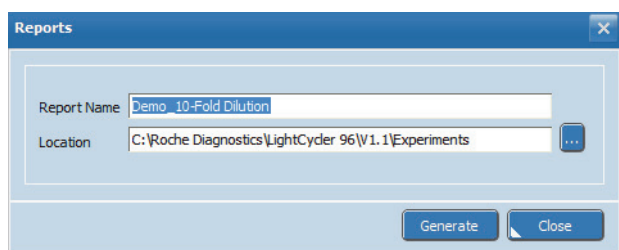

**Figure 46: Reports dialog box**

The dialog box allows for specifying the name and location of the corresponding report:

| Setting            | Description                                                                                                                                                                                                                                                                                                                                                                                                                          |
|--------------------|--------------------------------------------------------------------------------------------------------------------------------------------------------------------------------------------------------------------------------------------------------------------------------------------------------------------------------------------------------------------------------------------------------------------------------------|
| <i>Report Name</i> | Name of the report to be generated.<br>The LightCycler® 96 Application Software provides a default name which is identical to the experiment name.                                                                                                                                                                                                                                                                                   |
| <i>Location</i>    | Location where you want to store the report. Each report is stored in a separate folder <i>&lt;report name&gt;</i> .<br> <i>By default, the default experiment directory is displayed. This directory can be specified in the 'Default Directory' dialog box. For detailed information, see section <a href="#">Preferences</a>, on page 134.</i> |

### To generate an experiment-specific HTML report

- 1 Open the relevant experiment.
- 2 In the toolbar, choose the *Reports* icon.  
The *Reports* dialog box opens.

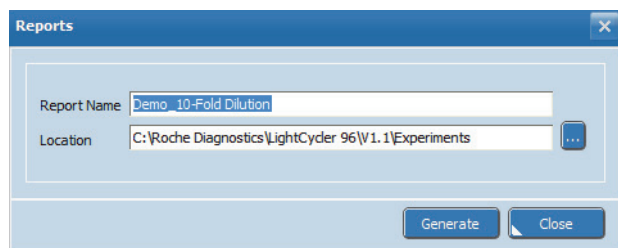

- 3 Specify the *Report Name* and the *Location* for the new report.

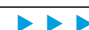

4 Choose *Generate*.

While the report is being generated, the dialog box displays a progress bar, showing the progress of the generation:

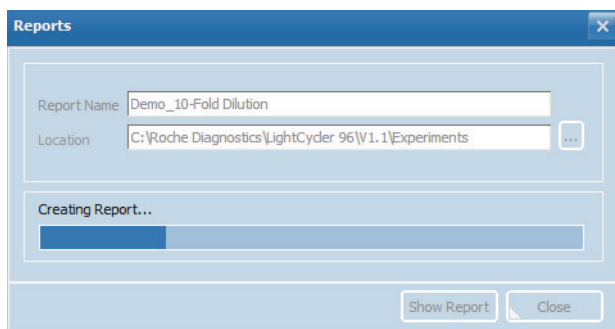

5 When the report is completed, choose *Show Report*.

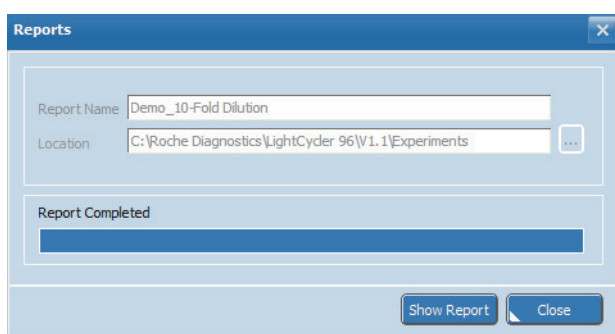

The report is displayed in the Microsoft Windows Internet Explorer installed on your computer, see section [Displaying the report information](#), below.

## Displaying the report information

If Microsoft Windows Internet Explorer 8 or 9 fails to display the report information, it is recommended to check the security setting:

In the *Tools > Internet Options > Advanced* dialog box, in the *Security* section, the *Allow active content to run in files on My Computer* option should be activated. This feature is usually activated by default when Internet Explorer is installed.

The browser displays the experiment-specific report as follows:

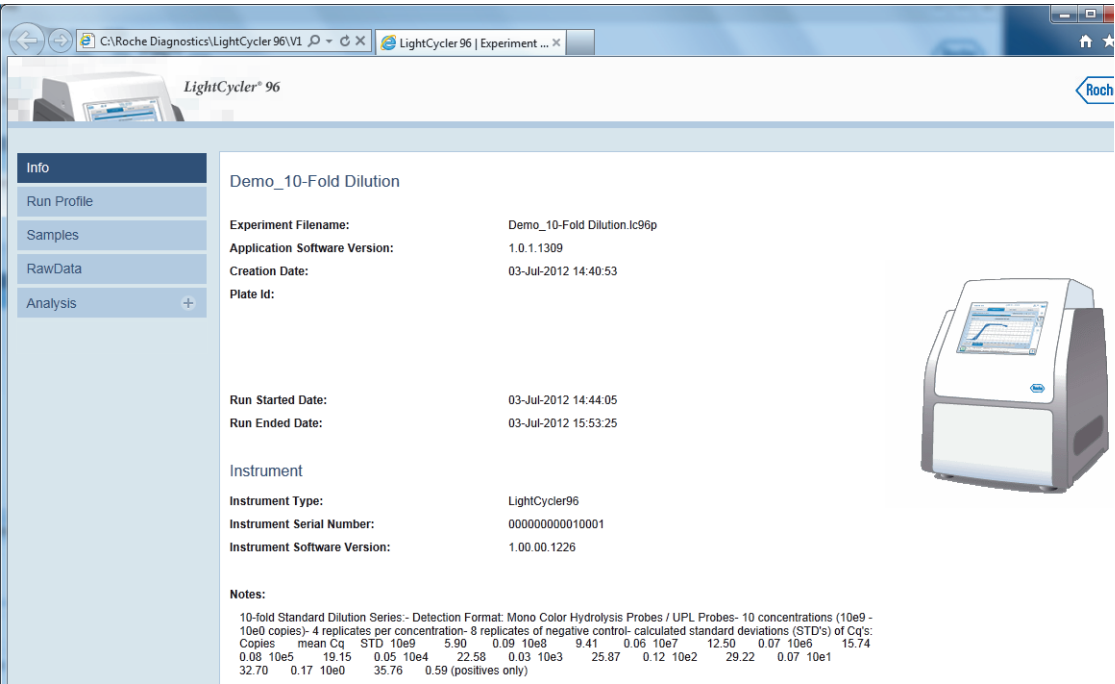

Figure 47: Reports Info page

The commands in the navigation list on the left of the page provide access to all data contained in the experiment:

| Command     | Description                                                                                                                                                                              |
|-------------|------------------------------------------------------------------------------------------------------------------------------------------------------------------------------------------|
| Info        | General information on the experiment, for example, the name and path of the experiment, the date and time the experiment was created, and the start and end date of the experiment run. |
| Run Profile | The experiment run settings as defined on the <i>Run Editor</i> tab, that is, the detection format, the program settings, and the temperature profile.                                   |
| Samples     | The multiwell plate image and the samples table of the experiment, as specified in the <i>Sample Editor</i> tab.                                                                         |
| Raw Data    | The raw data of the experiment.                                                                                                                                                          |
| Analysis    | The analysis settings and the results for each analysis. Choosing the + sign in the <i>Analysis</i> entry opens a list of all analyses contained in the experiment.                      |

## 1.6 Import, export, and file transfer options

The following figure shows the input and output data flows of the application software. The data to be imported and exported is described below.

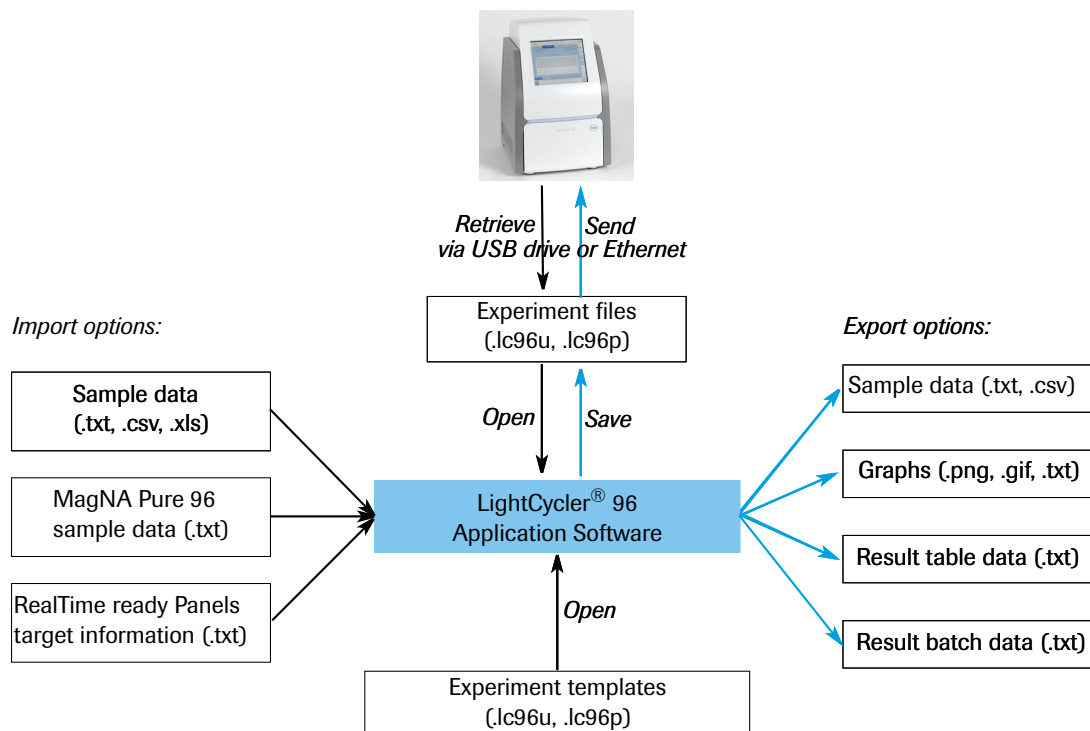

**Figure 48: LightCycler® 96 Application Software input and output data flow**

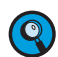

Legacy experiments from LightCycler® 96 Application Software Version 1.0 (\*.lc96 file types) can be opened with version 1.1. But after automatic conversion to version 1.1, the files are saved as \*.lc96p or \*.lc96u files.

### 1.6.1 Import data

To define a new experiment, the following data can be imported into the LightCycler® 96 Application Software:

| Data                | File Format          | Description                                                                                                                                                                                                                                                                                                                           |
|---------------------|----------------------|---------------------------------------------------------------------------------------------------------------------------------------------------------------------------------------------------------------------------------------------------------------------------------------------------------------------------------------|
| Experiment template | .lc96u, .lc96p       | Predefined operator settings to be specified in the experiment definition.<br>For detailed information, see the following sections:<br><ul style="list-style-type: none"> <li>▶ <a href="#">To use an existing experiment as a template</a>, on page 114.</li> <li>▶ <a href="#">To use a Roche template</a>, on page 114.</li> </ul> |
| Sample data         | .txt<br>.csv<br>.xls | Sample information for an experiment, including sample names, gene names, and dye assignment. For detailed information, see section <a href="#">To import sample data into the sample list</a> , on page 158.                                                                                                                         |



| Data                                     | File Format | Description                                                                                                                                                                                                                                                                                                                                                                                                                                                                                                                                    |
|------------------------------------------|-------------|------------------------------------------------------------------------------------------------------------------------------------------------------------------------------------------------------------------------------------------------------------------------------------------------------------------------------------------------------------------------------------------------------------------------------------------------------------------------------------------------------------------------------------------------|
| MagNA Pure 96 sample data                | .txt        | <p>Samples file exported from the MagNA Pure 96 Software in LightCycler® System readable format (*.txt). The file contains the following settings:</p> <ul style="list-style-type: none"> <li>▶ <i>Position</i></li> <li>▶ <i>Sample Name</i></li> <li>▶ <i>Sample Note</i></li> <li>▶ <i>Sample ID</i></li> <li>▶ <i>Sample Prep Notes</i></li> </ul> <p>The <i>Sample ID</i> information is ignored during import.</p> <p>For detailed information, see section <a href="#">To import sample data into the sample list</a>, on page 158.</p> |
| RealTime ready Panels target information | .txt        | <p>Text files generated for import of target information for RealTime ready Panels 96. The file contains the following settings:</p> <ul style="list-style-type: none"> <li>▶ <i>Pos</i></li> <li>▶ <i>Target Name</i></li> <li>▶ <i>Combined sample/target type</i></li> </ul> <p>The combined sample/target type information is ignored during import.</p>                                                                                                                                                                                   |

### 1.6.2 Export data

To store the results of an experiment or transfer the results to other software programs, the corresponding files must be exported. The LightCycler® 96 Application Software provides export functions for the following data:

| Data              | File Format          | Description                                                                                                                                                                                                                                                                                          |
|-------------------|----------------------|------------------------------------------------------------------------------------------------------------------------------------------------------------------------------------------------------------------------------------------------------------------------------------------------------|
| Sample data       | .txt<br>.csv         | Sample and gene data specified on the <i>Sample Editor</i> tab of the experiment definition. For detailed information, see section <a href="#">Exporting the sample list</a> , on page 156.                                                                                                          |
| Graph             | .png<br>.gif<br>.txt | Result charts data saved as a bitmap format file (*.png), a Graphics Interchange Format file (*.gif), or a text file with the samples as columns or rows.<br>For detailed information, see section <a href="#">Working with graphs</a> , on page 106.                                                |
| Result table data | .txt                 | Tab-delimited text file (*.txt) containing the currently displayed result table including the header line.<br>For detailed information, see section <a href="#">Exporting the result table</a> , on page 218.                                                                                        |
| Result batch data | .txt                 | Tab-delimited text file (*.txt) containing the result table data collected from multiple experiment files, including the header line and the original file name and plate ID for each sample.<br>For detailed information, see section <a href="#">Exporting multiple result data</a> , on page 218. |

## 1.7 Disregarding positions from an analysis

The LightCycler® 96 Application Software provides the following options for eliminating positions from the analysis:

- ▶ The *Clear Wells* function, provided on the *Plate View* tab of the *Sample Editor*. *Clear Wells* eliminates the selected wells from all analyses.

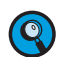

*It is strongly recommended to use the 'Clear Wells' function for all empty wells of LightCycler® 480 Multiwell Plates 96 and for positions not occupied by LightCycler® 8-Tube Strips.*

- ▶ The *Remove* function, provided in the <analysis> *Settings* dialog box of an analysis. *Remove* eliminates samples, genes, and/or conditions (only for relative quantification) from the corresponding analysis.
- ▶ The *Exclude* function, provided in the analysis result tables. *Exclude* eliminates the selected samples from the result calculation of the corresponding analysis.

For detailed information, see section [Eliminating positions from the analysis](#), on page 165.

## 1.8 Exiting the software

### To exit the LightCycler® 96 Application Software

1

Perform one of the following steps:

- ▶ In the *File* menu, choose *Exit*.
- ▶ In the title bar of the main window, choose the  button.  
You are prompted to save unsaved data before the application shuts down.

## 2 Tools

In the *Tools* menu, the LightCycler® 96 Application Software provides several tools for managing and monitoring LightCycler® 96 Instruments and for exporting result data from multiple experiment files.

### 2.1 Instrument Manager

The *Instrument Manager* provides access to the following functions:

- ▶ Registering a LightCycler® 96 Instrument with the application software, see section [Instruments window area](#), on page 125.
- ▶ Transferring experiments to and from the selected instrument, see section [Send/Receive Experiments tab](#), on page 128.
- ▶ Opening an experiment in the application software or deleting an experiment from the instrument, see section [Send/Receive Experiments tab](#), on page 128.
- ▶ Monitoring an experiment run on an instrument, see section [Online Monitoring tab](#), on page 130.

#### Preconditions

For using the functions of the *Instrument Manager* the following preconditions apply:

- ▶ The LightCycler® 96 Instrument is switched on.
- ▶ The instrument is configured for use in the network; see the following sections:
  - ▶ [Configuring a one-to-one connection](#), on page 50.
  - ▶ [Configuring an Ethernet network connection](#), on page 55.
- ▶ The instrument is connected to the network; see section [Assembling the instrument](#), on page 44.
- ▶ The computer running the LightCycler® 96 Application Software is connected to the network.
- ▶ The *Remote Monitoring* function is activated and configured accordingly in the LightCycler® 96 Instrument Software; see section [Configuration tab](#), on page 256.

The *Instrument Manager* wizard is accessed via the *Tools* menu (in this example, the *Information* tab is shown):

*Tools > Instrument Manager*

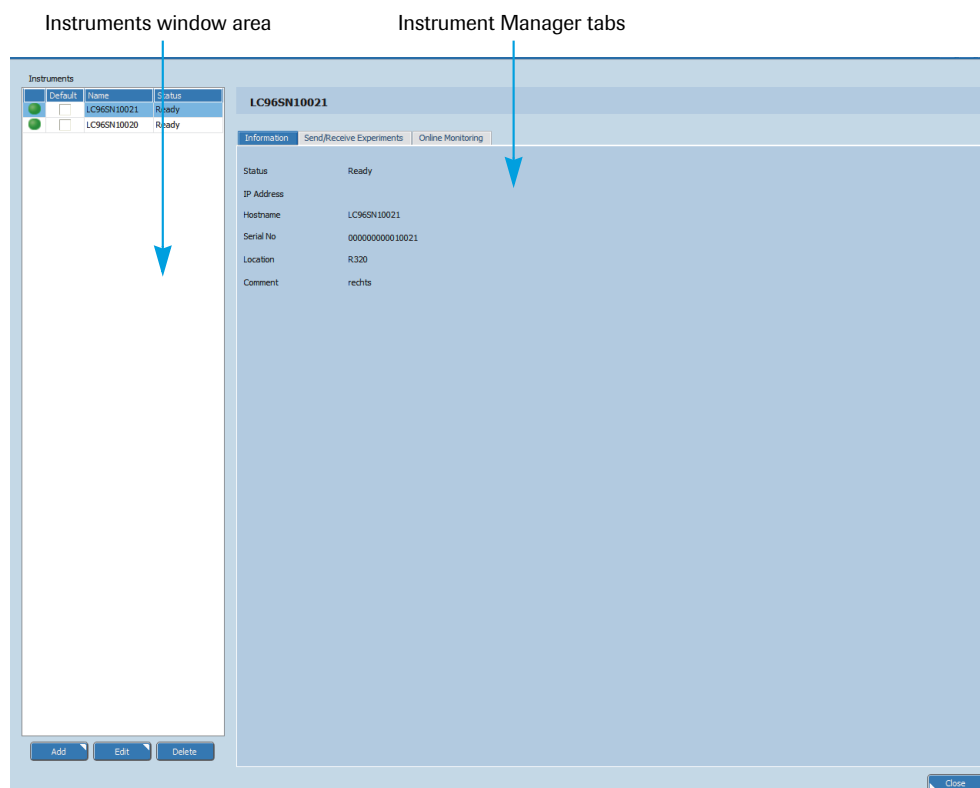

**Figure 49: Instrument Manager**

### 2.1.1 Instruments window area

The columns in the *Instruments* table show the properties for each registered instrument. For detailed information on registering instruments, see section [To register an instrument](#), on page 126.

| Column         | Description                                                                                                                      |
|----------------|----------------------------------------------------------------------------------------------------------------------------------|
|                | Connection status of the instrument:<br>▶ Online: Green dot<br>▶ Offline: red dot                                                |
| <i>Default</i> | Specifies whether the instrument is the default instrument; see section <a href="#">To register an instrument</a> , on page 126. |
| <i>Name</i>    | Host name or IP address of the instrument, defined in the <i>Add/Edit Instrument</i> dialog box.                                 |
| <i>Status</i>  | Processing status of the instrument.                                                                                             |

The buttons below the *Instruments* table perform the following functions:

| Button        | Description                                                                                                                                             |
|---------------|---------------------------------------------------------------------------------------------------------------------------------------------------------|
| <i>Add</i>    | Opens the <i>Add/Edit Instrument</i> dialog box for editing the properties and registering an instrument with the LightCycler® 96 Application Software. |
| <i>Edit</i>   | Opens the <i>Add/Edit Instrument</i> dialog box for editing the properties of an instrument already registered with the application software.           |
| <i>Delete</i> | Deletes the selected instrument from the table. The instrument is no longer registered with the application software.                                   |

### Add/Edit Instrument dialog box

**Figure 50:** Add/Edit Instrument dialog box

In the *Add/Edit Instrument* dialog box, operators specify the properties of an instrument to be registered with the LightCycler® 96 Application Software:

| Setting                       | Description                                                                                      |
|-------------------------------|--------------------------------------------------------------------------------------------------|
| <i>IP Address or Hostname</i> | IP address or host name of the instrument, specified in the LightCycler® 96 Instrument Software. |
| <i>Location</i>               | Optional: Location of the instrument.                                                            |
| <i>Comment</i>                | Optional: Description of the instrument                                                          |

### To register an instrument

The instrument must be registered with the application software for sending and retrieving experiment files to/from the LightCycler® 96 Instrument Software or for monitoring a LightCycler® 96 Instrument. The application software allows for registering up to 10 instruments.

- 1 In the *Tools* menu, choose *Instrument Manager*.  
The *Instrument Manager* window opens.
- 2 Below the *Instruments* table, choose *Add*.  
The *Add/Edit Instrument* dialog box opens.
- 3 Optional: In the *Name* field, enter the name of the instrument to be used in the application software.

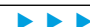

- 4 In the *IP Address or Hostname* field, enter the IP address or host name of the instrument in the network.  
 You specify the host name on the 'Configuration' tab of the LightCycler® 96 Instrument Software. For detailed information, see section [Device Name / Hostname](#), on page 257.  
*Local networks are usually run by a DHCP (dynamic host configuration protocol) server. The server provides dynamic IP addresses to all hosts in the network. As the frequency for changing IP addresses varies from network to network (IP addresses might change daily), it is recommended to register an instrument in the 'Instrument Manager' via its host name instead of its IP address.*  
*The host name does not change when the IP address changes. Thus, a stable connection is maintained regardless of changing IP addresses.*
- 5 Optional: Choose the *Test* button to test the connection to the IP address.  
 If the IP address is not available, the software displays an error message:
  - ▶ *Warning: Test Connection*  
*Communication failed: Could not get instrument data.*
  - ▶ *Error: Test Connection*  
*Communication failed: Could not reach instrument.*
- 6 Optional: In the *Location* field, enter the location of the instrument.
- 7 Optional: In the *Comment* field, enter a description of the instrument.
- 8 Choose *OK*. The dialog box closes.
  - ▶ The instrument is registered with the application software and displayed in the *Instruments* list.
  - ▶ The *Information* tab shows the properties of the instrument; see section [Information tab](#), below.
- 9 Optional: To specify the instrument as the default, select the check box in the *Default* column.

### 2.1.2 Information tab

The Information tab displays the properties of a LightCycler® 96 Instrument selected in the *Instruments* table.

| Property          | Description                                                                         |
|-------------------|-------------------------------------------------------------------------------------|
| <i>Status</i>     | Processing status of the instrument.                                                |
| <i>IP Address</i> | IP address of the instrument, specified in the LightCycler® 96 Instrument Software. |
| <i>Hostname</i>   | Host name of the instrument, specified in the LightCycler® 96 Instrument Software.  |
| <i>Serial No</i>  | Serial number of the instrument.                                                    |
| <i>Location</i>   | Optional: Location of the instrument.                                               |
| <i>Comment</i>    | Optional: Description of the instrument.                                            |

### 2.1.3 Send/Receive Experiments tab

The *Send/Receive Experiments* tab provides a transfer function for experiments to and from a registered LightCycler® 96 Instrument. If more than one experiment exists in the network, the operator must select the corresponding instrument.

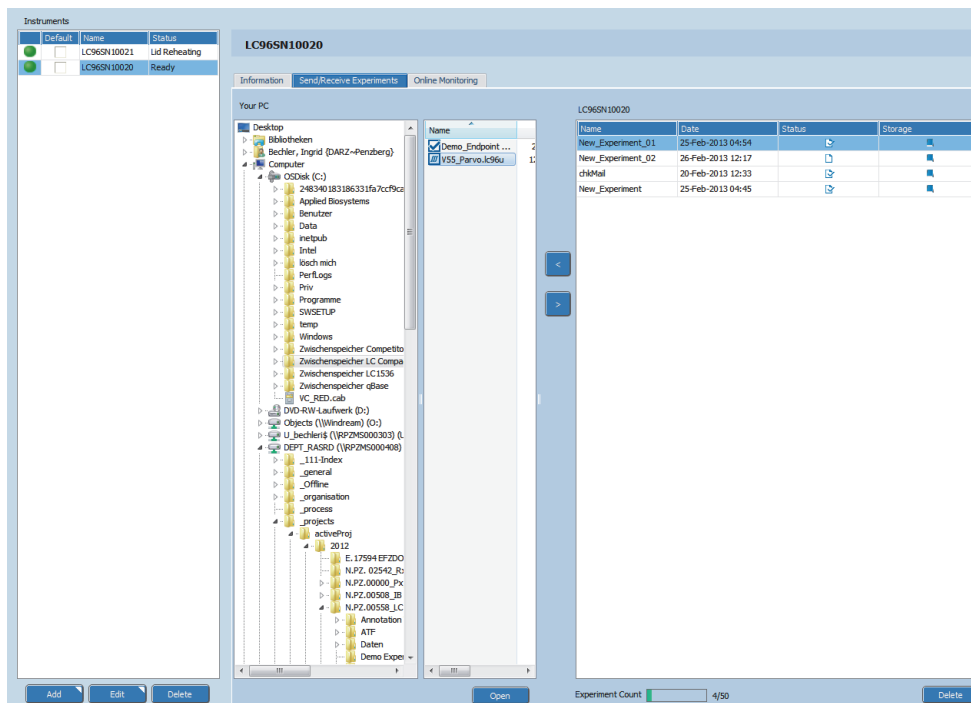

Figure 51: Instrument Manager, Send/Receive Experiments tab

#### Your PC window area

The *Your PC* window area provides a file explorer for navigating to the location of the experiment file.

#### <instrument> window area

The <instrument> window area provides the following data:

- ▶ The *Disc Space* bar showing the number of experiments saved on the instrument in relation to the possible maximum number of experiments.
- ▶ The experiments table displaying all experiments available on the instrument.

| Column         | Description                                                                                            |
|----------------|--------------------------------------------------------------------------------------------------------|
| <i>Name</i>    | Experiment name.                                                                                       |
| <i>Date</i>    | Date and time of the last modification.                                                                |
| <i>Status</i>  | Status of the experiment: <i>Running</i> , <i>Processed</i> , <i>Unprocessed</i> , or <i>Aborted</i> . |
| <i>Storage</i> | Location of the experiment file: On the instrument, on the connected USB drive, or on both locations.  |

The buttons in the *Send/Receive Experiments* tab perform the following functions:

| Button        | Description                                                |
|---------------|------------------------------------------------------------|
| <i>Open</i>   | Opens the selected experiment in the application software. |
| <i>Delete</i> | Deletes the selected experiment from the instrument.       |

### To send an experiment to an instrument

- 1 In the Tools menu, choose *Instrument Manager*.  
The *Instrument Manager* window opens.
  - 2 Open the *Send/Receive Experiments* tab.
  - 3 In the *Instruments* table, select the instrument the experiment is to be sent to.
  - 4 In the *Your PC* window area, navigate to the directory containing the experiment. All experiments in this directory are displayed.
  - 5 Select the experiment to be sent to the instrument.
  - 6 Choose the  button.  
The experiment is sent to the selected instrument.
-  *You are notified if the instrument does not have enough space for the experiment.  
If an experiment with the same name already exists on the instrument, you are prompted for a new name.*

### To retrieve an experiment from an instrument

- 1 In the Tools menu, choose *Instrument Manager*.  
The *Instrument Manager* window opens.
  - 2 Open the *Send/Receive Experiments* tab.
  - 3 In the *Instruments* table, select the instrument the experiment is to be retrieved from.
  - 4 In the *Your PC* window area, navigate to the directory the experiment is to be transferred to.
  - 5 In the *<instrument>* area, select the experiment to be retrieved.
  - 6 Choose the  button.  
The selected experiment is retrieved from the instrument and saved to the specified directory on your computer.
-  *If an experiment with the same name already exists in the selected directory, you are prompted for a new name.*

### 2.1.4 Online Monitoring tab

The *Online Monitoring* tab provides the raw fluorescence data collected during an experiment run in real time.

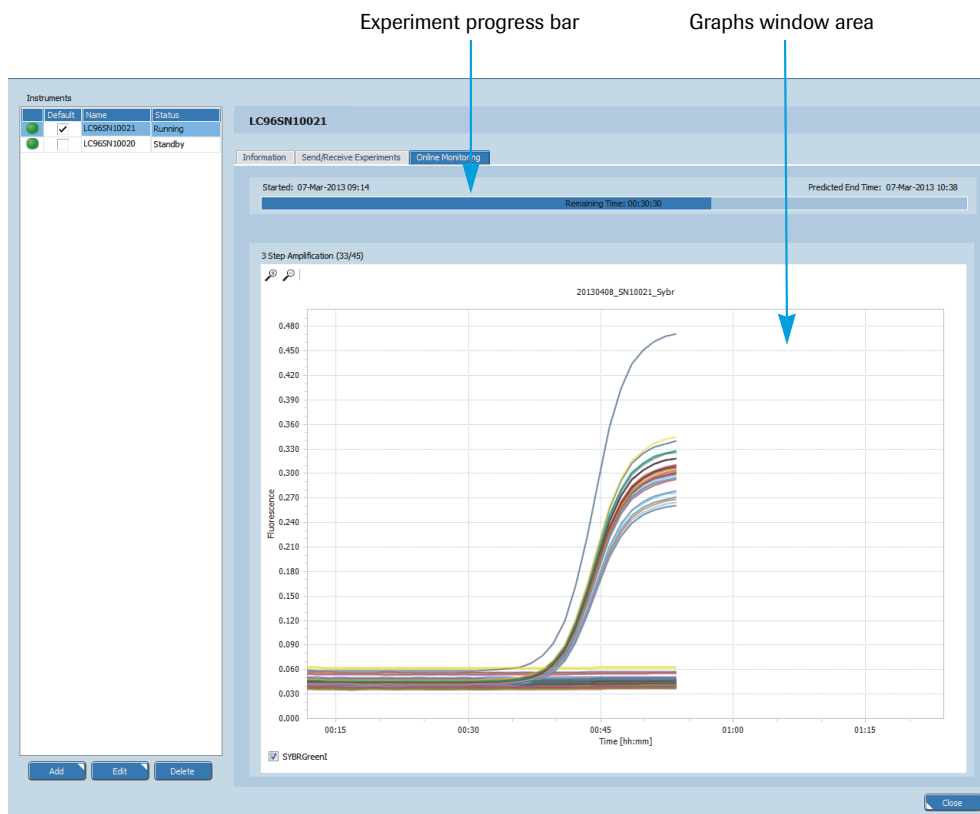

Figure 52: Instrument Manager, Online Monitoring tab

#### Experiment progress bar

The experiment progress bar at the top of the tab provides the following information:

- ▶ The start time of the experiment.
- ▶ The predicted end time of the experiment.
- ▶ The predicted time the experiment run will take.

#### Graphs window area

The graphs window area provides the fluorescence curves, that is, the fluorescence intensity against the time in hours, minutes, and seconds for the entire run. There is one curve for each sample that has a gene labeled with the selected dye.

## 2.2 Result Batch Export

The *Result Batch Export* wizard provides a batch export tool that allows for creating a file with result table data collected from different experiments of the same type. The batch export function exports the collected result table data to a tab-delimited text file (\*.txt). You can open this file using Microsoft Excel.

The resulting text file contains all result data, including the header rows, the experiment name and plate ID for each sample. The result batch export includes the following items:

- ▶ Hidden columns
- ▶ Excluded positions
- ▶ Deselected positions

Filter settings are not applied during result batch export.

The *Result Batch Export Wizard* is accessed via the *Tools* menu:

*Tools > Result Batch Export*

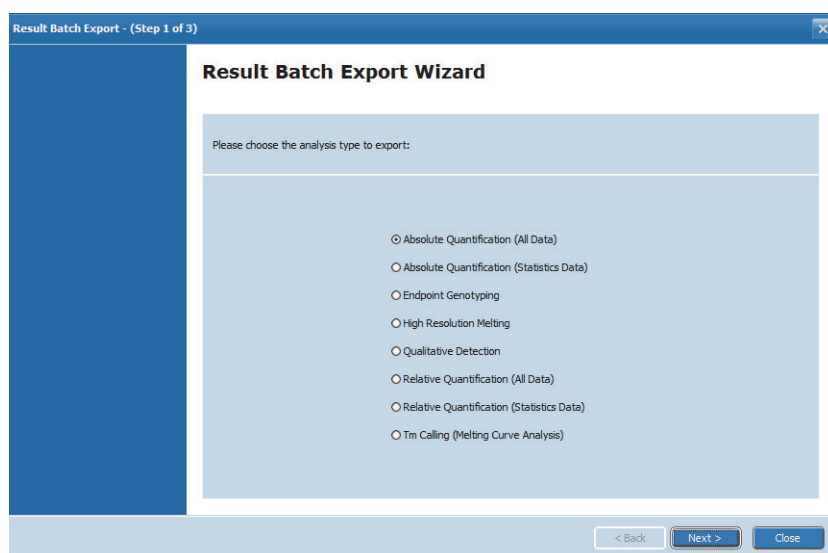

**Figure 53: Result Batch Export wizard**

The buttons in the *Result Batch Export* wizard perform the following functions:

| Button        | Description                                                                                                  |
|---------------|--------------------------------------------------------------------------------------------------------------|
| <i>Back</i>   | Returns to the previous page of the wizard.                                                                  |
| <i>Next</i>   | Opens the next page.                                                                                         |
| <i>Export</i> | Only displayed on the <i>Export</i> page:<br>Exports the selected data to a tab-delimited text file (*.txt). |
| <i>Close</i>  | Closes the wizard and discards all settings.                                                                 |

2.2.1 Analysis type

The first page of the *Result Batch Export* wizard allows for selecting one of the following analysis types:

- ▶ Absolute quantification, all data
- ▶ Absolute quantification, statistical data
- ▶ Endpoint genotyping
- ▶ High resolution melting
- ▶ Qualitative detection
- ▶ Relative quantification, all data
- ▶ Relative quantification, statistical data
- ▶  $T_m$  calling

2.2.2 File selection

Choosing *Next* opens the *Experiment Files Selection* page:

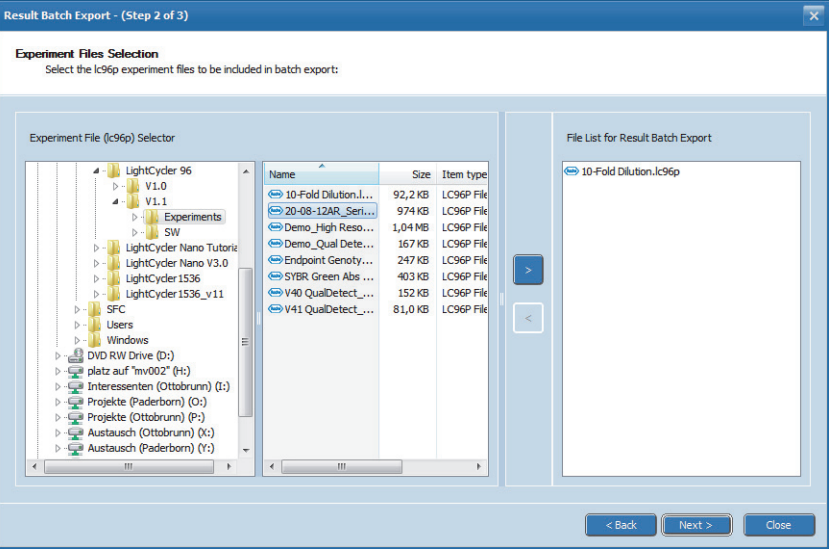

Figure 54: Result Batch Export wizard, Experiment Files Selection

| Window area                       | Description                                                           |
|-----------------------------------|-----------------------------------------------------------------------|
| Experiment File (Lc96p) Selector  | File explorer for navigating to the location of the experiment files. |
| File List for Result Batch Export | Experiment files the operator has selected for export.                |

### 2.2.3 Export

Choosing *Next* opens the *Export* page:

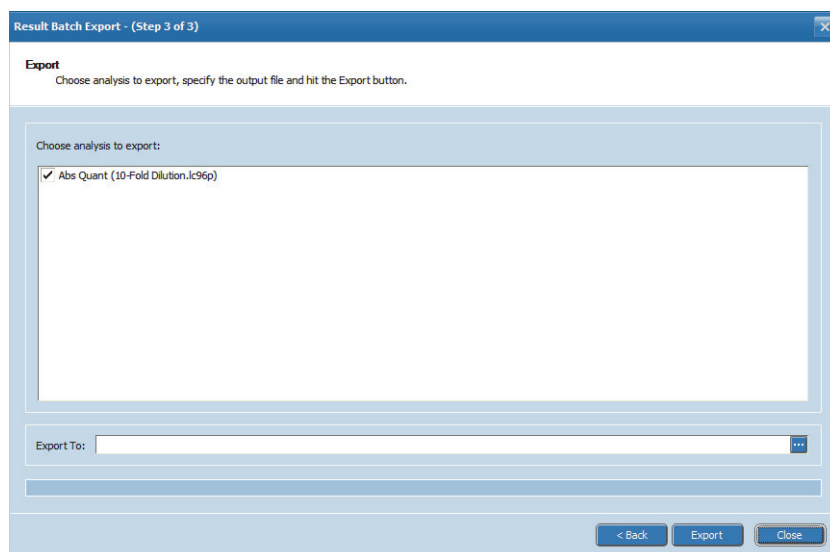

Figure 55: Result Batch Export wizard, Export

| Window area/field                | Description                                          |
|----------------------------------|------------------------------------------------------|
| <i>Choose analysis to export</i> | Analyses contained in the selected experiment files. |
| <i>Export To</i>                 | Path and name for the batch export result file.      |

#### To export multiple result data

- 1 In the *Tools* menu, choose *Result Batch Export*.  
The *Result Batch Export* wizard opens.
- 2 Choose the analysis type to be exported.
- 3 Choose *Next*.  
The *Experiment Files Selection* page opens.
- 4 In the *Experiment File (Ic96p) Selector* window area, navigate to the directory containing the corresponding experiments. All experiments in this directory are displayed.
- 5 Select the experiments to be exported.
- 6 Choose the  button to the right of the experiments list.  
The selected experiments are added to the *File List for Result Batch Export*.
- 7 Optional:
  - ▶ Repeat steps 4 to 6 to add experiments stored in other directories.
  - ▶ If necessary, use the  button to remove experiments from the list.
- 8 Choose *Next*.  
The *Export* page opens.
- 9 In the *Choose analysis to export* list, choose the analyses to be exported.
- 10 In the *Export To* field, specify the path and the name for the batch export result file.
- 11 Choose *Export*.
  - ▶ The progress bar at the bottom of the page shows the progress of the export process.
  - ▶ You are notified when the export process is finished.

### 3 Preferences

The LightCycler® 96 Application Software provides the *Preferences* dialog box, where general settings are specified, for example, the default directories to be used. The dialog box is accessed via the *Options* menu:

*Options > Preferences*

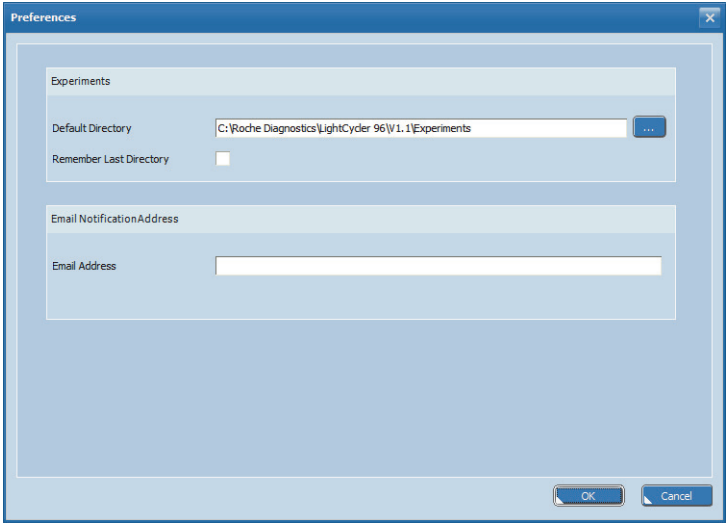

Figure 56: Preferences dialog box

| Setting                 | Description                                                                                                                                                                                                                                                                                                                                                                                                                                                                                                                                                                                                                                                                                                                                                                                                                        |
|-------------------------|------------------------------------------------------------------------------------------------------------------------------------------------------------------------------------------------------------------------------------------------------------------------------------------------------------------------------------------------------------------------------------------------------------------------------------------------------------------------------------------------------------------------------------------------------------------------------------------------------------------------------------------------------------------------------------------------------------------------------------------------------------------------------------------------------------------------------------|
| Default Directory       | Default path for saving and loading experiment files                                                                                                                                                                                                                                                                                                                                                                                                                                                                                                                                                                                                                                                                                                                                                                               |
| Remember Last Directory | <p>The last opened directory is to be remembered as long as the application is running.</p> <p> After a restart, the software opens the specified default directory.</p>                                                                                                                                                                                                                                                                                                                                                                                                                                                                                                                                                                        |
| Email Address           | <p>Email address to be linked to all experiments generated with the current software instance; when these experiments are executed, the instrument software automatically sends an email notification to the defined email address after the run. The notification also contains the corresponding experiment file.</p> <p> This email address is saved to the experiment file and is therefore available in the properties of the experiment.</p> <p>To stop automatic emailing of executed experiments, the operator must delete the email address from the 'Email Address' field.</p> <p>It is not necessary to activate this email in the instrument's email address book (see section <a href="#">Email Information</a>, on page 259).</p> |

## 4 Run Editor tab

On the *Run Editor* tab, the temperature profile and the dye-specific parameters for an experiment run are specified.

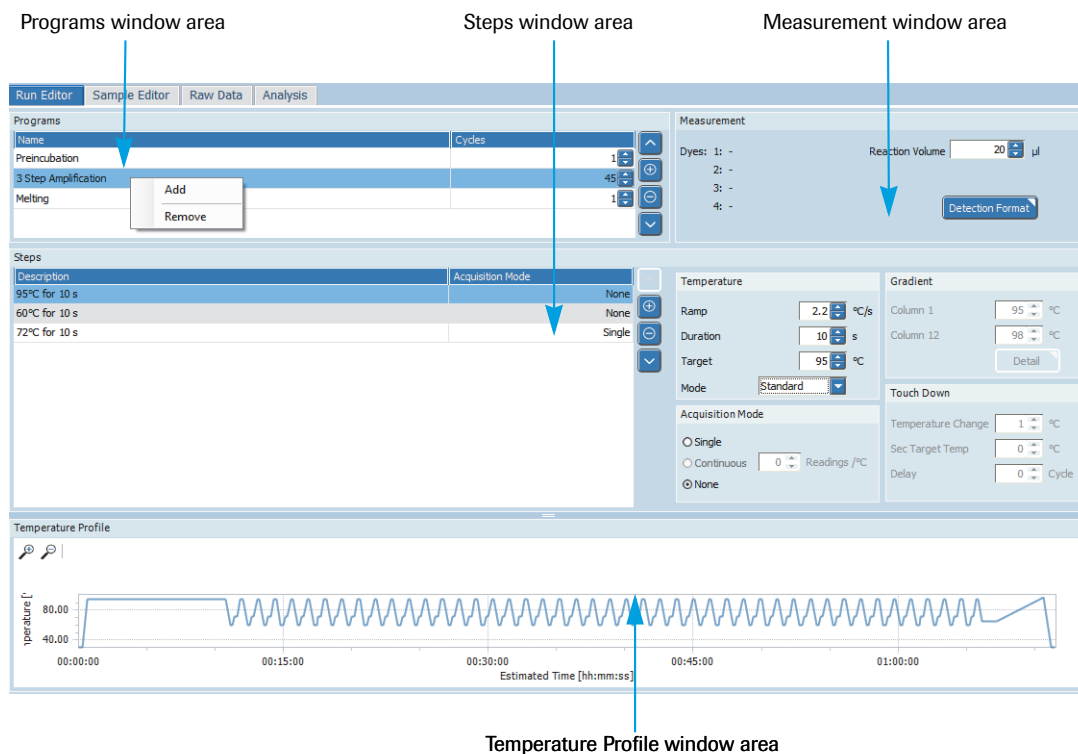

Figure 57: Run Editor tab

For a new experiment, this tab shows no data. For detailed information on how to create a temperature profile and set the dye-specific parameters, refer to the *LightCycler® 96 System User Training Guide*.

### 4.1 Programs window area

All profiles are comprised of programs, which are run by the instrument in the order they are displayed in the *Programs* window area. Each program can be specified separately.

The programs are displayed in a list and have the following properties:

| Parameter | Description                                                                                                                                                                                                                                                                                                                                                                                                              |
|-----------|--------------------------------------------------------------------------------------------------------------------------------------------------------------------------------------------------------------------------------------------------------------------------------------------------------------------------------------------------------------------------------------------------------------------------|
| Name      | Name of the program.                                                                                                                                                                                                                                                                                                                                                                                                     |
| Cycles    | Specifies how many times the cycle is to be repeated, for example 45 times.<br> If, in an amplification program, the 'Cycles' are set to '1', the acquisition mode for the corresponding step changes to 'None' and the 'Mode' option is disabled. For detailed information, see section <a href="#">Step settings</a> , on page 139. |

A program, and thus also a profile, can only be edited as long as no run has been performed. Every change is displayed immediately in the *Temperature Profile* window area.

#### 4.1.1 Programs list buttons

The *Programs* list can be edited with the following buttons:

| Button                                                                            | Function | Description                                                                                                                                                                                                                 |
|-----------------------------------------------------------------------------------|----------|-----------------------------------------------------------------------------------------------------------------------------------------------------------------------------------------------------------------------------|
|  | Up       | Moves the selected program up one place. If there is no selected program, or the selected item is first in the list, this button is disabled.                                                                               |
|  | Add      | Opens the <i>Add New Program</i> dialog box which allows for adding a new program to the list. The new program is added to the end of the list. For detailed information, see <a href="#">Adding a new program</a> , below. |
|  | Remove   | Deletes the selected program from the list. If no program is selected, this button is disabled.                                                                                                                             |
|  | Down     | Moves the selected program down one place. If there is no selected program, or the selected item is last in the list, this button is disabled.                                                                              |

#### 4.1.2 Programs list shortcut menu

The shortcut menu in the *Programs* list provides functions for adding and removing programs.

| Command       | Description                                                                                                                                                                                                                 |
|---------------|-----------------------------------------------------------------------------------------------------------------------------------------------------------------------------------------------------------------------------|
| <i>Add</i>    | Opens the <i>Add New Program</i> dialog box which allows for adding a new program to the list. The new program is added to the end of the list. For detailed information, see <a href="#">Adding a new program</a> , below. |
| <i>Remove</i> | Deletes the selected program from the list. If no program is selected, this button is disabled.                                                                                                                             |

#### 4.1.3 Adding a new program

The  button in the *Programs* list or the *Add* command on the shortcut menu opens the *Predefined Programs* dialog box, which allows for selecting a new program and adding it to the *Programs* list.

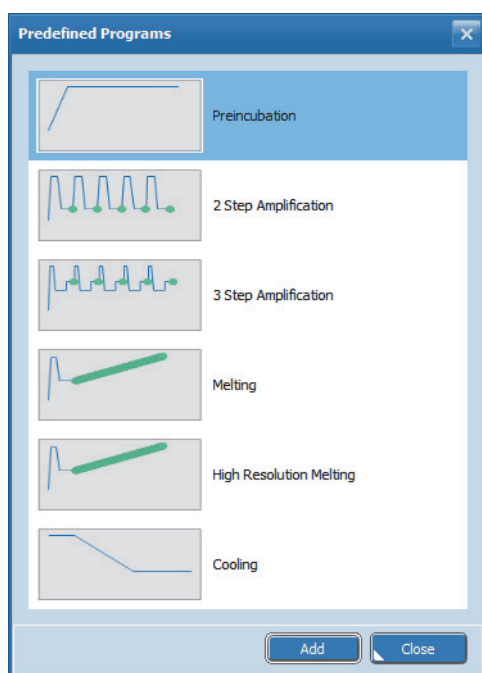

Figure 58: Predefined Programs dialog box

The following programs are available:

| Program                                | Description                                                                                                                                                                                                                                                                                                                                                                                                                                                                                                                                                                                          |
|----------------------------------------|------------------------------------------------------------------------------------------------------------------------------------------------------------------------------------------------------------------------------------------------------------------------------------------------------------------------------------------------------------------------------------------------------------------------------------------------------------------------------------------------------------------------------------------------------------------------------------------------------|
| <i>Preincubation</i>                   | Holds a specified temperature for a defined time.                                                                                                                                                                                                                                                                                                                                                                                                                                                                                                                                                    |
| <i>2 Step/3 Step Amplification</i>     | <p>Cycling program; defines a program of the experiment where the instrument will repeatedly heat and cool to a defined series of temperatures. Each repeat is called a cycle.</p> <p>The touchdown function for amplification programs allows the operator to specify that one of the stages of each cycle will have its target temperature modified as the cycling proceeds. This allows for the early cycles of a PCR to have a higher annealing temperature specified, leading to more specific amplification. For detailed information, see section <a href="#">Touchdown</a>, on page 140.</p> |
| <i>Melting/High Resolution Melting</i> | Defines a program where the instrument will ramp to an initial temperature, then ramp to a final temperature. While ramping to the final temperature, optical acquisitions will be made continuously. These can then be analyzed to yield melting peaks.                                                                                                                                                                                                                                                                                                                                             |
| <i>Cooling</i>                         | Defines a program where the instrument will cool down to a final temperature and then hold the specified temperature for a defined time.                                                                                                                                                                                                                                                                                                                                                                                                                                                             |

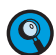

*It is not necessary to add a separate cooling program at the end of the run. At the end of each run, the samples are automatically cooled to +37°C.*

B

## 4.2 Steps window area

A program consists of one or more steps, which are run by the instrument in the order they are displayed in the *Steps* window area. A step specifies the following data:

- ▶ The target temperatures used by the instrument.
- ▶ The length of time for which the target temperature is held.
- ▶ The heating and cooling rates for reaching the target temperature.
- ▶ The acquisition mode to define how optical data is acquired.

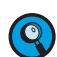

*The minimum experiment definition has one program with one cycle and one valid step.*

*If multiple amplification programs with acquisitions are defined, only the first amplification program is considered for result calculation and chart display.*

*If multiple melting programs with acquisitions are defined, the 'Melting Selection' dialog box opens for selecting the melting program for result calculation. For detailed information, see section [Adding a new analysis](#), on page 164.*

The LightCycler® 96 Instrument adjusts the temperature between the steps automatically, cooling or heating up to meet the temperature specified for the next step.

The steps are displayed in a list and have the following properties. The LightCycler® 96 Application Software derives these properties from the settings in the *Temperature* and *Measurement* areas to the right of the *Steps* list (see section [Step settings](#), on page 139).

| Parameter               | Description                                                                         |
|-------------------------|-------------------------------------------------------------------------------------|
| <i>Description</i>      | Target temperature and duration in seconds for which the temperature is to be held. |
| <i>Acquisition Mode</i> | Acquisition mode: <i>None</i> , <i>Single</i> , or <i>Continuous</i> .              |

### 4.2.1 Steps list buttons

The *Steps* list can be edited with the following buttons:

| Button | Function | Description                                                                                                                                 |
|--------|----------|---------------------------------------------------------------------------------------------------------------------------------------------|
|        | Up       | Moves the selected step up one place. If there is no selected step, or the selected item is first in the list, this button is disabled.     |
|        | Add      | Adds a new step to the list. The new step is added to the end of the list.                                                                  |
|        | Remove   | Deletes the selected step from the list. If no step is selected, this button is disabled.                                                   |
|        | Down     | Moves the selected step down one place. If there is no selected program, or the selected item is last in the list, this button is disabled. |

### 4.2.2 Steps list shortcut menu

The shortcut menu in the *Steps* list provides functions for adding and removing steps.

| Command       | Description                                                                               |
|---------------|-------------------------------------------------------------------------------------------|
| <i>Add</i>    | Adds a new step to the list. The new step is added to the end of the list.                |
| <i>Remove</i> | Deletes the selected step from the list. If no step is selected, this button is disabled. |

### 4.2.3 Step settings

A step can only be edited as long as no run has been performed. The settings of a selected step are displayed in the *Temperature*, *Measurement*, and *Touchdown* areas to the right of the *Steps* list. Every change is displayed immediately in the *Steps* list and the *Temperature Profile* window area.

The following settings can be specified for each step in a program:

#### Temperature

| Setting             | Description                                                                                                                                             |
|---------------------|---------------------------------------------------------------------------------------------------------------------------------------------------------|
| <i>Ramp (°C/s)</i>  | Rate of temperature change in °C per second, which the LightCycler® 96 Instrument uses for heating or cooling until the defined temperature is reached. |
| <i>Duration (s)</i> | Duration in seconds for which the temperature is to be held.                                                                                            |
| <i>Target (°C)</i>  | Temperature in °C, which is to be held for a defined time.                                                                                              |
| <i>Mode</i>         | Only available for amplification programs:<br>Mode to be used for the temperature grading, <i>Standard</i> , <i>Gradient</i> or <i>Touch down</i> .     |

#### Acquisition Mode

| Setting                 | Parameter                       | Description                                                                                                                                                                           |
|-------------------------|---------------------------------|---------------------------------------------------------------------------------------------------------------------------------------------------------------------------------------|
| <i>Acquisition Mode</i> | <i>Single</i>                   | Only available for amplification programs:<br>Acquires fluorescence data once only, when the temperature target is reached and the hold time completed.                               |
|                         | <i>Continuous (readings/°C)</i> | Not available for amplification programs:<br>Number of optical acquisitions to be performed. The fluorescence data are acquired continuously until the temperature target is reached. |
|                         | <i>None</i>                     | No fluorescence data are acquired.                                                                                                                                                    |

#### Gradient

The *Gradient* mode is only available for amplification programs and when no touchdown is specified. It specifies the temperature grading used by the LightCycler® 96 Instrument for heating the different Peltier elements in the thermal block cyler. Operators can specify temperature gradients from 37 to 98°C.

| Setting               | Description                                                                                                       |
|-----------------------|-------------------------------------------------------------------------------------------------------------------|
| <i>Column 1 (°C)</i>  | Minimum temperature for the gradient. This temperature is applied to the leftmost column of the multiwell plate.  |
| <i>Column 12 (°C)</i> | Maximum temperature for the gradient. This temperature is applied to the rightmost column of the multiwell plate. |

The *Detail* button opens the *Gradient* dialog box, which displays a detailed view of the specified temperature gradient.

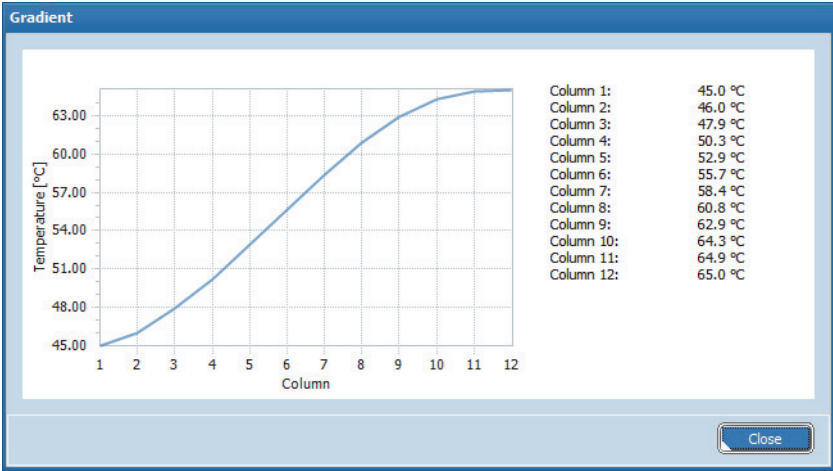

Figure 59: Gradient dialog box

The curve in the dialog box shows the applied temperature gradient according to the columns on the multiwell plate.

### Touchdown

The *Touch Down* mode is only available for amplification programs and when no gradient is specified.

| Setting                 | Description                                                                                                                                                                         |
|-------------------------|-------------------------------------------------------------------------------------------------------------------------------------------------------------------------------------|
| Temperature Change [°C] | Rate of temperature change in °C per cycle, at which the touchdown phase proceeds to the final phase temperature.                                                                   |
| Sec Target Temp [°C]    | Second target temperature to be reached by the last cycle of the program. This temperature is used to change the target temperature of a segment during the amplification reaction. |
| Delay [Cycles]          | Number of cycles after which the temperature change is first applied.                                                                                                               |

### 4.3 Measurement window area

In the *Measurement* window area the operator specifies the dye-specific settings for an experiment run. The *Measurement* window area provides the following settings:

| Setting                    | Description                                                                                                                                                                                                                                                                                                                                                                                                                                                                                                                                                                                 |
|----------------------------|---------------------------------------------------------------------------------------------------------------------------------------------------------------------------------------------------------------------------------------------------------------------------------------------------------------------------------------------------------------------------------------------------------------------------------------------------------------------------------------------------------------------------------------------------------------------------------------------|
| Dyes                       | Dye to be used in this experiment.<br>You choose the dye in the <i>Detection Format</i> dialog box. For detailed information, see section <a href="#">Detection Format</a> , below.                                                                                                                                                                                                                                                                                                                                                                                                         |
| Reaction Volume [ $\mu$ l] | Reaction volume to be used in the experiment.<br> <i>The LightCycler® 96 Application Software supports reaction volumes from 5 to 50 <math>\mu</math>l. However, the recommended minimum volume is 10 <math>\mu</math>l, because smaller volumes may result in reduced data quality.</i><br><i>As the LightCycler® 96 Instrument does not validate the reaction volume, the operator must ensure that the specified reaction volume matches the volume pipetted into the wells of the multiwell plate.</i> |

B

### Detection Format

The *Detection Format* button opens the *Detection Format* dialog box. By setting the detection formats, the operator chooses the filter combinations suitable for the experiment. A detection format specifies one or more excitation-emission filter combinations. For detailed information, see section [Detection channels](#), on page 38.

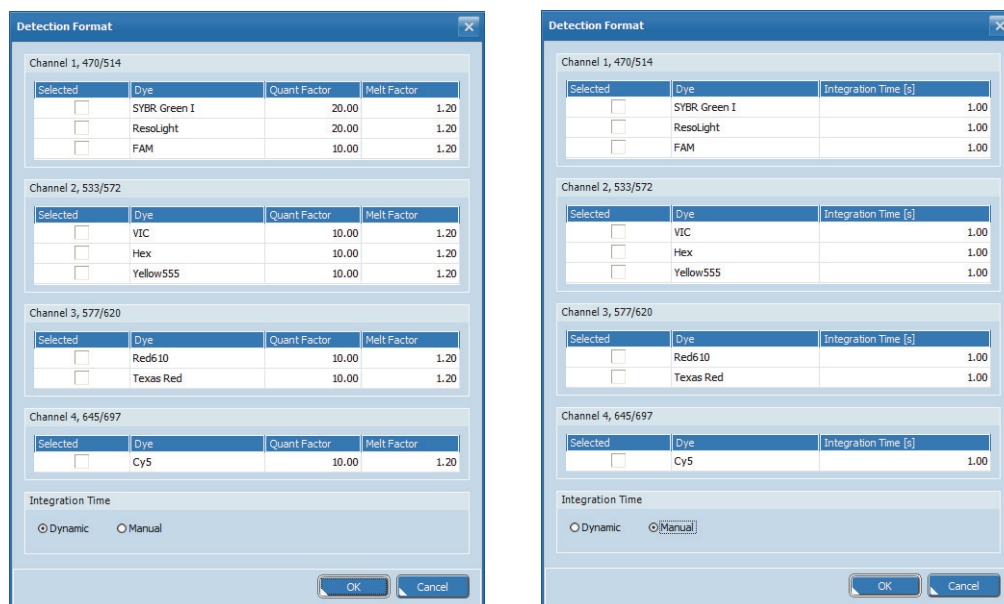

Figure 60: Detection Format dialog box, Dynamic versus Manual mode

The dialog box shows the following settings for each channel (that is, for each filter combination):

| Column                      | Description                                                                                                                                                                                                                                                                                                                                                                                                            | Possible values |
|-----------------------------|------------------------------------------------------------------------------------------------------------------------------------------------------------------------------------------------------------------------------------------------------------------------------------------------------------------------------------------------------------------------------------------------------------------------|-----------------|
| <i>Selected</i>             | Specifies whether the channel is to be used by selecting the corresponding dye.<br> Only one dye can be selected per channel. The software automatically deselects a check box when you try to select more than one dye in the same channel group. SYBR Green I and ResoLight Dye cannot be combined with any dye of another channel. |                 |
| <i>Dye</i>                  | Name of the dye.                                                                                                                                                                                                                                                                                                                                                                                                       |                 |
| <i>Quant Factor</i>         | Only displayed if the integration time mode is set to <i>Dynamic</i> : Multiplication factor to be applied to the filter combination for a quantification program. The <i>Quant Factor</i> represents the fold signal stroke from the initial background fluorescence to the plateau phase.                                                                                                                            | 1.0 to 500      |
| <i>Melt Factor</i>          | Only displayed if the integration time mode is set to <i>Dynamic</i> : Multiplication factor to be applied to the filter combination for a melting program.                                                                                                                                                                                                                                                            | 1.0 to 500      |
| <i>Integration Time [s]</i> | Only displayed if the integration time mode is set to <i>Manual</i> : Amount of time for which the LED will be used to excite the wells during a single optical reading. The higher this value is set, the more light will be emitted from the fluorophores in the well, and the larger the resulting spectral values are.                                                                                             | 0.1 to 10 sec   |

The integration time is defined as the acquisition time of the CCD camera. Depending on the integration time mode chosen for the detection format, the dialog box shows the following settings:

| Mode           | Description                                                                                                                                                                                                                                                  | Setting          |
|----------------|--------------------------------------------------------------------------------------------------------------------------------------------------------------------------------------------------------------------------------------------------------------|------------------|
| <i>Dynamic</i> | The integration time is set automatically based on the fluorescence of the individual plate.<br> For quantification and melting programs an independent value can be set. | Melt Factor      |
|                |                                                                                                                                                                                                                                                              | Quant Factor     |
| <i>Manual</i>  | The integration time is set manually.                                                                                                                                                                                                                        | Integration Time |

#### 4.4 Temperature Profile window area

The *Temperature Profile* window area provides a summary of the programs selected for the experiment and their temperature and time settings.

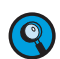

When starting an experiment run, the operator must ensure that the correct temperature profile is used.

## 5 Sample Editor tab

The *Sample Editor* tab allows operators to create, edit, delete, and rearrange samples and genes present in the wells, as well as the dyes used to label each gene. A single sample can be present in one or more different wells and can have one or more genes of interest. This sample and gene data will then be used to perform different analysis methods. In addition to sample names and gene names, operators can also edit condition names. This property is only relevant for relative quantification analysis. For detailed information, see section [Relative quantification](#), on page 176).

The operator can perform the corresponding tasks in the *Plate View* or *Table View* tabs. Changes on the *Plate View* tab are immediately displayed in the *Table View* tab and vice versa.

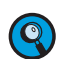

The operator must ensure that the sample assignment in the 'Sample Editor' tab matches the pipetting scheme on the multiwell plate.

### Sample Editor tool bar icon

The following icon in the tool bar is only displayed when the *Sample Editor* tab is opened:

| Icon                                                                              | Function | Description                                                                                                                                                             |
|-----------------------------------------------------------------------------------|----------|-------------------------------------------------------------------------------------------------------------------------------------------------------------------------|
|  | Undo     | Allows the operator to undo the last five steps.<br>When the operator saves the experiment, or leaves the <i>Sample Editor</i> tab, the <i>Undo</i> history is cleared. |

### Editing the Sample Editor when analyses already exist

If analyses are already defined in an experiment and the operator changes the sample- and/or gene-specific properties, the *Sample Layout Changed* dialog box is displayed when leaving the *Sample Editor*.

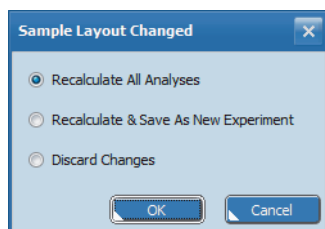

Figure 61: Sample Layout Changed dialog box

| Setting                                         | Description                                                                                                                                                                                                           |
|-------------------------------------------------|-----------------------------------------------------------------------------------------------------------------------------------------------------------------------------------------------------------------------|
| <i>Recalculate All Analyses</i>                 | Recalculates all analyses in the experiment based on the new settings in the <i>Sample Editor</i> . The <i>Analysis</i> tab is displayed showing the recalculated values.                                             |
| <i>Recalculate &amp; Save As New experiment</i> | Recalculates all analyses in the experiment and opens the <i>Save As</i> dialog box for specifying a new experiment file. For detailed information, see section <a href="#">Creating an experiment</a> , on page 113. |
| <i>Discard Changes</i>                          | Discards the changes and opens the <i>Analysis</i> tab without recalculating the analyses.                                                                                                                            |

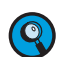

If the operator has only changed the sample colors, the 'Sample Layout Changed' dialog box is not displayed. The new sample colors are applied to all analyses generated subsequently, but not to already existing analyses.

## 5.1 Plate View tab

The *Plate View* tab of the *Sample Editor* shows the assigned samples and genes in wells laid out as a LightCycler® 480 Multiwell Plate 96.

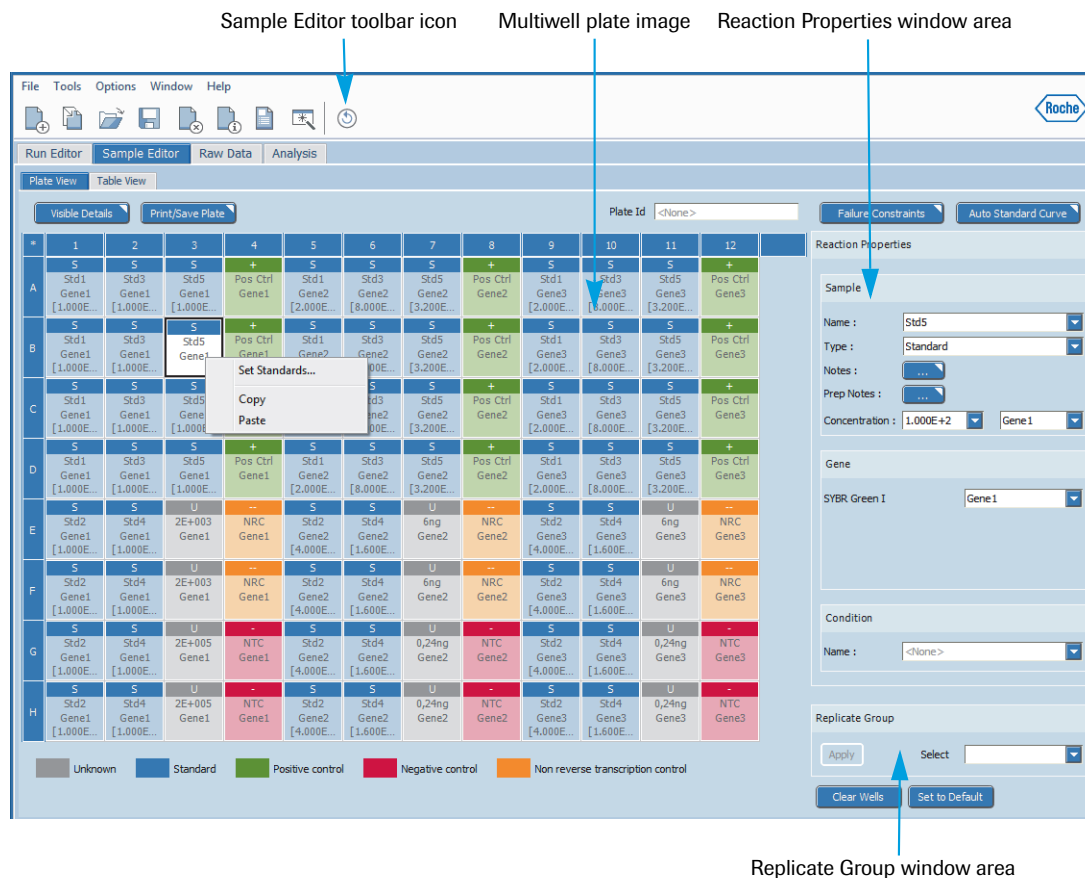

**Figure 62: Plate View tab**

For a new experiment, this tab shows the following data:

- ▶ The default sample names *Sample 1* to *Sample 96*.
- ▶ The sample type *Unknown* for all samples.

For detailed information on how to define the reaction properties according to different applications, refer to the *LightCycler® 96 System User Training Guide*.

### 5.1.1 Multiwell plate image

The multiwell plate image provides a schematic of the multiwell plate mount for editing the range of samples. Each row is allocated a letter from A to H. The wells of a row are displayed as columns and numbered from left to right.

- ▶ Each well displays the sample properties according to the operator's selection. For detailed information on how to customize the plate view, see section [Visible Details](#), on page 148.
- ▶ Each well is colored to match the sample type in the corresponding well.
- ▶ Hovering the cursor over a well displays a tooltip with the properties of the sample.
- ▶ Selecting a well or a range of wells allow editing of the corresponding properties using the fields in the window areas displayed to the right of the multiwell plate image.

#### Plate image shortcut menu

The multiwell plate image provides a shortcut menu containing the following command:

| Command              | Description                                                                                                                                                                                                                                                                         |
|----------------------|-------------------------------------------------------------------------------------------------------------------------------------------------------------------------------------------------------------------------------------------------------------------------------------|
| <i>Set Standards</i> | Opens the <i>Auto Standard Curve</i> dialog box. For detailed information, see section <a href="#">Auto Standard Curve</a> , on page 151.                                                                                                                                           |
| <i>Copy</i>          | Copies the properties of the selected wells to the clipboard.                                                                                                                                                                                                                       |
| <i>Paste</i>         | Pastes the properties from the clipboard into the selected wells.<br> <i>If the operator does not select enough wells for pasting, the paste function automatically completes the selection.</i> |

### 5.1.2 Reaction Properties window area

The *Reaction Properties* window area allows operators to create or edit the following properties of samples and genes in a selected well or a range of wells. Property changes are immediately displayed in the multiwell plate image.

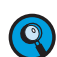

*The Sample Editor allows operators to edit the sample- and/or gene-specific properties, and the condition names (only relevant for relative quantification). Settings affecting the analysis of the data are to be specified in the corresponding 'Analysis' tab. For detailed information, see section [Analysis tab](#), on page 162.*

| Setting   | Property      | Description                                                                                                                                                                                                                                                                                                                                                                                                                                                                                                                                                                                                                                                                                                                                                                                                                                                                                                                                                                                                                                                                                                                                                                       |
|-----------|---------------|-----------------------------------------------------------------------------------------------------------------------------------------------------------------------------------------------------------------------------------------------------------------------------------------------------------------------------------------------------------------------------------------------------------------------------------------------------------------------------------------------------------------------------------------------------------------------------------------------------------------------------------------------------------------------------------------------------------------------------------------------------------------------------------------------------------------------------------------------------------------------------------------------------------------------------------------------------------------------------------------------------------------------------------------------------------------------------------------------------------------------------------------------------------------------------------|
| Sample    | Name          | <p>Sample name.<br/>The name is used to identify the sample in tables, wells, graphs, etc.</p> <p> <i>The sample names are case-sensitive. For example, 'sample1' is different from 'Sample1'.</i></p>                                                                                                                                                                                                                                                                                                                                                                                                                                                                                                                                                                                                                                                                                                                                                                                                                                                                                           |
|           | Type          | <p>Sample type.<br/>The following sample types are possible:</p> <ul style="list-style-type: none"> <li>▶ <i>Unknown</i><br/>Sample with unknown quantity of a specific gene.</li> <li> <i>For relative quantification analysis, only the type 'Unknown' is used for calculating the corresponding ratios.</i></li> <li>▶ <i>Standard</i><br/>Sample with known quantity of a specific gene. By comparing the Cq values of unknown samples of the same gene to the Cq values of these known standard quantities, the unknown quantities can be estimated. You may provide as many standards as required to cover the expected range of quantities of unknown genes. When specifying samples as standards, each gene in the reaction needs to be assigned a <i>Concentration</i> value.</li> <li>▶ <i>Positive control</i><br/>Sample containing a specific gene.</li> <li>▶ <i>Negative control</i><br/>Sample without a specific gene.</li> <li>▶ <i>Non reverse transcription control</i><br/>Reaction without reverse transcriptase enzyme to check for genomic DNA contamination.</li> </ul> |
|           | Notes         | <p>Description of the sample.<br/>Choosing the button opens the <i>Edit Sample Note</i> dialog box, which allows for a longer, multi-line description.</p>                                                                                                                                                                                                                                                                                                                                                                                                                                                                                                                                                                                                                                                                                                                                                                                                                                                                                                                                                                                                                        |
|           | Prep Notes    | <p>Notes as specified in imported MagNA Pure 96 sample data files. Operators can edit the displayed text.</p>                                                                                                                                                                                                                                                                                                                                                                                                                                                                                                                                                                                                                                                                                                                                                                                                                                                                                                                                                                                                                                                                     |
|           | Concentration | <p>Only available for sample type <i>Standard</i>:<br/>Concentration value for the standard quantity of the gene selected in the list.</p>                                                                                                                                                                                                                                                                                                                                                                                                                                                                                                                                                                                                                                                                                                                                                                                                                                                                                                                                                                                                                                        |
| Gene      | <dye>         | <p>Associates the gene with the displayed dye. Where multiple dyes are used (for example, hydrolysis probes with different wavelengths), the instrument allows multiple genes in the same well.</p> <ul style="list-style-type: none"> <li>▶ The &lt;dye&gt; list provides all dyes assigned in the corresponding detection formats. For detailed information on how to define a detection format, see section <a href="#">Detection Format</a>, on page 141.</li> <li>▶ For each dye, a gene can be assigned by editing the text field or choosing a gene from the list. The list provides the gene names which are already defined.</li> </ul> <p> <i>The sample names are case-sensitive. For example, 'gen1' is different from 'Gen1'.</i></p>                                                                                                                                                                                                                                                                                                                                             |
| Condition | Name          | <p>Only relevant for relative quantification analysis:<br/>Condition name for grouping the samples according to different conditions during the experiment run.</p> <p>One of these conditions is to be specified in the analysis as a study calibrator for calculating the scaled ratio. For detailed information, see section <a href="#">Scaled ratio</a>, on page 72.</p> <p> <i>The condition names are case-sensitive. For example, 'day1' is different from 'Day1'.</i></p>                                                                                                                                                                                                                                                                                                                                                                                                                                                                                                                                                                                                             |

### 5.1.3 Replicate Group window area

The *Replicate Group* window area allows operators to create new replicate groups and arrange samples in them. The replicate group is always named according to the top leftmost of the corresponding wells. If this "master replicate" is removed, the next top leftmost position takes on the role.

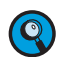

*If properties of one of the replicate group members are changed, the corresponding sample is removed from the replicate group.*

| Property | Description                                                                             |
|----------|-----------------------------------------------------------------------------------------|
| Select   | Name of the replicate group.<br>The list provides the already defined replicate groups. |

The LightCycler® 96 Application Software automatically groups samples in replicate groups, provided they have identical values for the following properties:

- ▶ Sample name (case-sensitive)
- ▶ Sample type
- ▶ Concentration
- ▶ Gene name (case-sensitive)
- ▶ Condition (case-sensitive)

All members of a replicate group automatically display the identical color, corresponding to the color of the master replicate. Automatically assigned replicate group colors are not adopted to already existing analyses, but only to subsequently generated analyses.

#### To create a replicate group

- 1 In the multiwell plate image, select the corresponding wells.
- 2 In the *Replicate Group* window area, choose *Apply*.  
The replicate group is created and named according to the top leftmost of the selected wells. The replicate group is now displayed in the *Select* list.

#### To select wells by replicate group

- 1 In the *Replicate Group* window area, choose a replicate group from the *Select* list.

#### To add samples to a replicate group

- 1 In the *Replicate Group* window area, choose a replicate group from the *Select* list.
- 2 In the multiwell plate image, select the additional wells.
- 3 In the *Replicate Group* window area, choose *Apply*.  
The properties of the samples in the replicate group are assigned to the additional samples.

#### 5.1.4 Visible Details

The *Visible Details* button opens the *Visible Details* dialog box, which allows for customizing the sample editor display.

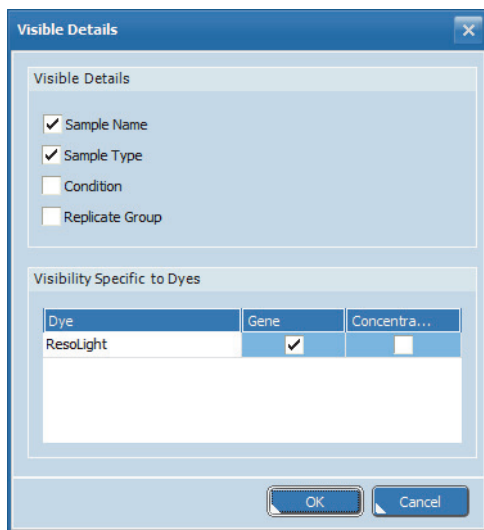

Figure 63: Visible Details dialog box

| Setting                            | Description                                                                                                                                |
|------------------------------------|--------------------------------------------------------------------------------------------------------------------------------------------|
| <i>Visible Details</i>             | Properties to be displayed for the wells in the plate window area. Selected properties are displayed, unselected properties are hidden.    |
| <i>Visibility Specific to Dyes</i> | Dye-specific properties to be displayed for the wells in the plate window area. The table shows a row for each dye assigned to the sample. |

#### 5.1.5 Print/Save Plate

The *Print/Save Plate* button opens the *Print Plate Preview*. Operators can print and save the plate view of an experiment as pipetting information. The printout matches the view on the screen, meaning the visibility of the properties are identical. The printout also shows the following data:

- ▶ The experiment name
- ▶ The plate ID
- ▶ The LightCycler® 96 Application Software version
- ▶ The print date

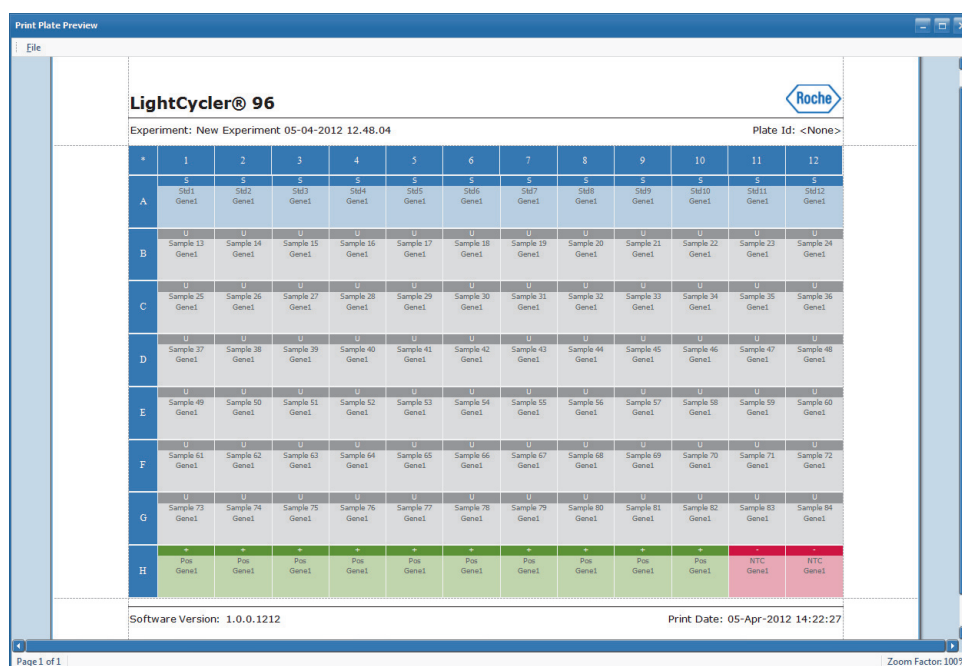

Figure 64: Print Plate Preview

Printing and saving the plate view is done via the commands in the *File* menu:

| Command               | Description                                                                                                                                                                                                                                                                                 |
|-----------------------|---------------------------------------------------------------------------------------------------------------------------------------------------------------------------------------------------------------------------------------------------------------------------------------------|
| <i>Page Setup ...</i> | Opens the <i>Page Setup</i> dialog box to specify the settings for the print page.                                                                                                                                                                                                          |
| <i>Print ...</i>      | Opens the <i>Print</i> dialog box to choose the printer settings and start printing the current plate view.                                                                                                                                                                                 |
| <i>Print</i>          | Prints the current plate view. The information is printed on the operator's system default printer. If the printer is not ready or an alarm occurs during the print process, an error message is displayed.                                                                                 |
| <i>Save as Image</i>  | Opens the <i>Save As</i> dialog and saves the plate view as an image to the specified location. The following file types are available: <ul style="list-style-type: none"> <li>▶ <i>JPEG image (.jpeg)</i></li> <li>▶ <i>PNG image (.png)</i></li> <li>▶ <i>BMP image (.bmp)</i></li> </ul> |
| <i>Exit</i>           | Closes the print preview.                                                                                                                                                                                                                                                                   |

### 5.1.6 Plate ID

The plate ID is saved to the experiment file for identification of the experiment.

When using the external handheld barcode scanner, the *Plate Id* field displays the barcode of the loaded multiwell plate. <None> is displayed if no barcode is available or no multiwell plate is loaded.

### 5.1.7 Failure Constraints

The *Failure Constraints* button opens the *Failure Conditions* dialog box, in which operators can define additional failure constraints, for example, for Cq and efficiency values in quantification analyses. A failure is raised if one or more of these constraints are not met. The failures are displayed in the result table of the corresponding analysis. For detailed information, see the description of the corresponding result tables in section [Analysis tab](#), on page 162.

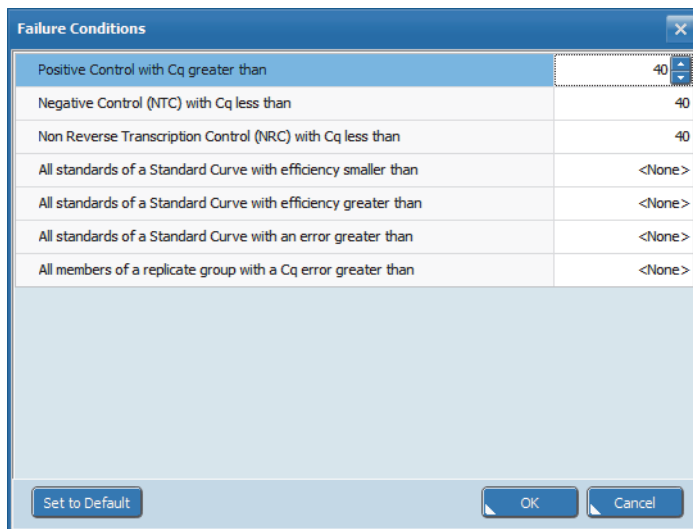

**Figure 65: Failure Conditions dialog box**

The dialog box provides the following failure constraints:

- ▶ *Positive Control with Cq greater than*
- ▶ *Negative Control (NTC) with Cq less than*
- ▶ *Non Reverse Transcription Control (NRC) with Cq less than*
- ▶ *All standards of a Standard Curve with efficiency smaller than*
- ▶ *All standards of a Standard Curve with efficiency greater than*
- ▶ *All standards of a Standard Curve with an error greater than*
- ▶ *All members of a replicate group with a Cq error greater than*

Each row in the list provides an input field for specifying the value for the corresponding condition.

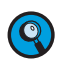

*A failure only means a notification for the operator. Positive/negative calls and Cq values are not changed and the corresponding samples are not automatically excluded from the calculation.*

### 5.1.8 Auto Standard Curve

The *Auto Standard Curves* button opens the *Auto Standard Settings* dialog box. This dialog box allows operators to set up a dilution series without having to define each well.

Operators must select an area in the multiwell plate image before opening the *Auto Standard Curve* dialog box.

The auto standard curve function supports the following areas:

- ▶ Rectangles
- ▶ Squares
- ▶ Horizontal or vertical single lines

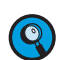

*All other selected areas and areas including cleared wells are not supported by the auto standard curve function. In this case a dialog box informs the operator.*

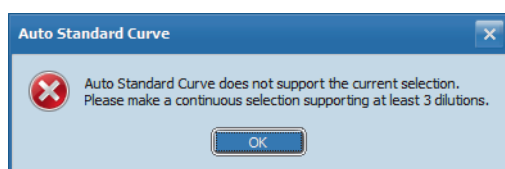

**Figure 66: Auto Standard Curve dialog box for a non-supported selection**

#### Rectangles

The long side of the rectangle defines the number of dilutions, the short side defines the number of replicates. The minimum supported rectangle size is 2 x 3 positions.

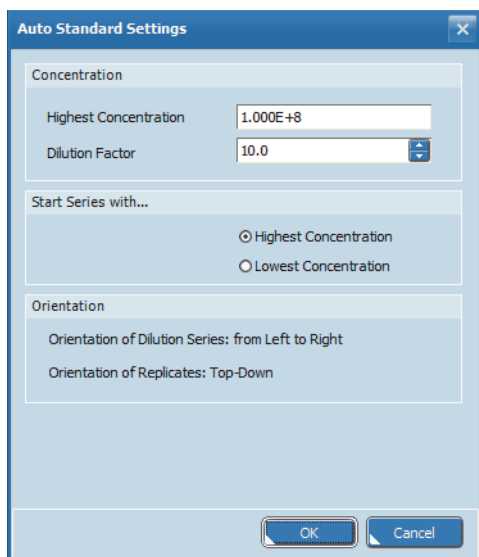

**Figure 67: Auto Standard Settings dialog box, rectangle**

| Window area       | Setting               | Description                                      |
|-------------------|-----------------------|--------------------------------------------------|
| Concentration     | Highest Concentration | Highest concentration of the dilution series.    |
|                   | Dilution Factor       | Dilution factor between adjacent dilution steps. |
| Start Series with | Highest Concentration | Starting concentration of the dilution series.   |
|                   | Lowest Concentration  |                                                  |

Squares

The dialog provides a function to define the orientation of dilutions and replicates. The minimum supported square size is 3 x 3 positions.

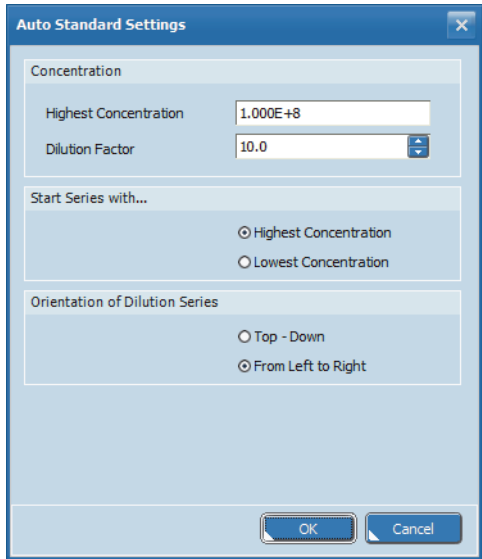

Figure 68: Auto Standard Settings dialog box, square

| Window area                    | Setting               | Description                                                             |
|--------------------------------|-----------------------|-------------------------------------------------------------------------|
| Concentration                  | Highest Concentration | Highest concentration of the dilution series.                           |
|                                | Dilution Factor       | Dilution factor between adjacent dilution steps.                        |
| Start Series With              | Highest Concentration | Starting concentration of the dilution series.                          |
|                                | Lowest Concentration  |                                                                         |
| Orientation of Dilution Series | Top-Down              | The dilutions are oriented top-down, the replicates from left to right. |
|                                | From Left To Right    | The dilutions are oriented from left to right, the replicates top-down. |

## Single Lines

Operators can select a horizontal or a vertical single line. The minimum number of positions supported in a single line is 3.

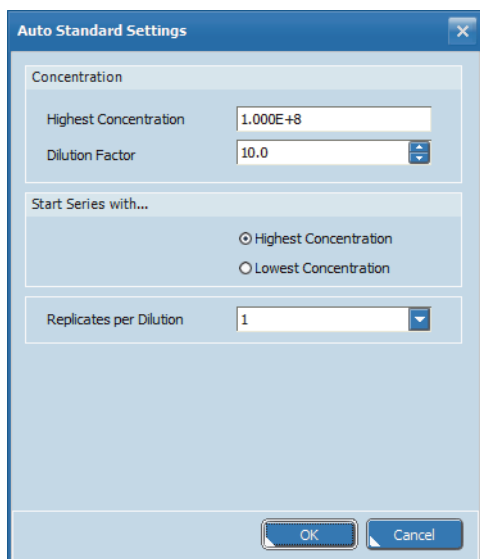

Figure 69: Auto Standard Settings dialog box, single line

| Window area             | Setting               | Description                                                                                                                                                                                                                              |
|-------------------------|-----------------------|------------------------------------------------------------------------------------------------------------------------------------------------------------------------------------------------------------------------------------------|
| Concentration           | Highest Concentration | Highest concentration of the dilution series.                                                                                                                                                                                            |
|                         | Dilution Factor       | Dilution factor between adjacent dilution steps.                                                                                                                                                                                         |
| Start Series With       | Highest Concentration | Starting concentration of the dilution series                                                                                                                                                                                            |
|                         | Lowest Concentration  |                                                                                                                                                                                                                                          |
| Replicates per Dilution |                       | Number of replicates per replicate group. The number of selected positions limits the available number of replicates. For example, when 8 positions are selected, the number of replicates per replicate group is limited to 1, 2 and 4. |

### 5.1.9 Clear Wells/Set to Default

The buttons below the *Replicate Group* area perform the following functions:

| Button         | Description                                                                                                                                                                                                                                                                                                                                                                                                                                                                                                                                             |
|----------------|---------------------------------------------------------------------------------------------------------------------------------------------------------------------------------------------------------------------------------------------------------------------------------------------------------------------------------------------------------------------------------------------------------------------------------------------------------------------------------------------------------------------------------------------------------|
| Clear Wells    | <p>Removes all property values from the selected wells.</p>  <p>Cleared wells are deactivated. This means they can no longer be edited and are not displayed in the table view and the analysis windows. To reactivate the wells, use the 'Set To Default' button.</p> <p>It is strongly recommended to use the 'Clear Wells' function for all empty wells of LightCycler® 480 Multiwell Plates 96 and for positions not occupied by LightCycler® 8-Tube Strips.</p> |
| Set to Default | Sets all property values to the corresponding default values.                                                                                                                                                                                                                                                                                                                                                                                                                                                                                           |

## 5.2 Table View tab

The *Table View* tab of the *Sample Editor* shows the assigned samples and genes in table format. For detailed information on editing cells and sorting and filtering the table, see section [Working with tables](#), on page 99.

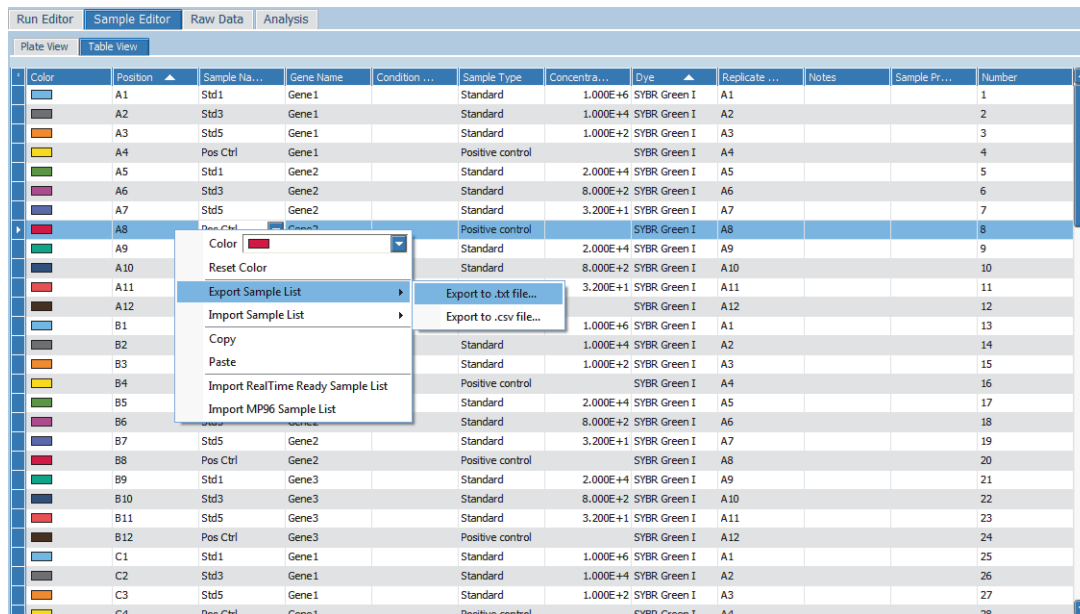

| Color | Position | Sample Name | Gene Name | Condition | Sample Type      | Concentra... | Dye          | Replicate ... | Notes | Sample Pr... | Number |
|-------|----------|-------------|-----------|-----------|------------------|--------------|--------------|---------------|-------|--------------|--------|
|       | A1       | Std1        | Gene1     |           | Standard         | 1.000E+6     | SYBR Green I | A1            |       |              | 1      |
|       | A2       | Std1        | Gene1     |           | Standard         | 1.000E+4     | SYBR Green I | A2            |       |              | 2      |
|       | A3       | Std5        | Gene1     |           | Standard         | 1.000E+2     | SYBR Green I | A3            |       |              | 3      |
|       | A4       | Pos Ctrl    | Gene1     |           | Positive control |              | SYBR Green I | A4            |       |              | 4      |
|       | A5       | Std1        | Gene2     |           | Standard         | 2.000E+4     | SYBR Green I | A5            |       |              | 5      |
|       | A6       | Std3        | Gene2     |           | Standard         | 8.000E+2     | SYBR Green I | A6            |       |              | 6      |
|       | A7       | Std5        | Gene2     |           | Standard         | 3.200E+1     | SYBR Green I | A7            |       |              | 7      |
|       | A8       | Pos Ctrl    | Gene2     |           | Positive control |              | SYBR Green I | A8            |       |              | 8      |
|       | A9       | Std1        | Gene3     |           | Standard         | 2.000E+4     | SYBR Green I | A9            |       |              | 9      |
|       | A10      | Std3        | Gene3     |           | Standard         | 8.000E+2     | SYBR Green I | A10           |       |              | 10     |
|       | A11      | Std5        | Gene3     |           | Standard         | 3.200E+1     | SYBR Green I | A11           |       |              | 11     |
|       | A12      | Pos Ctrl    | Gene3     |           | Positive control |              | SYBR Green I | A12           |       |              | 12     |
|       | B1       | Std1        | Gene1     |           | Standard         | 1.000E+6     | SYBR Green I | A1            |       |              | 13     |
|       | B2       | Std1        | Gene1     |           | Standard         | 1.000E+4     | SYBR Green I | A2            |       |              | 14     |
|       | B3       | Std5        | Gene1     |           | Standard         | 1.000E+2     | SYBR Green I | A3            |       |              | 15     |
|       | B4       | Pos Ctrl    | Gene1     |           | Positive control |              | SYBR Green I | A4            |       |              | 16     |
|       | B5       | Std1        | Gene2     |           | Standard         | 2.000E+4     | SYBR Green I | A5            |       |              | 17     |
|       | B6       | Std3        | Gene2     |           | Standard         | 8.000E+2     | SYBR Green I | A6            |       |              | 18     |
|       | B7       | Std5        | Gene2     |           | Standard         | 3.200E+1     | SYBR Green I | A7            |       |              | 19     |
|       | B8       | Pos Ctrl    | Gene2     |           | Positive control |              | SYBR Green I | A8            |       |              | 20     |
|       | B9       | Std1        | Gene3     |           | Standard         | 2.000E+4     | SYBR Green I | A9            |       |              | 21     |
|       | B10      | Std3        | Gene3     |           | Standard         | 8.000E+2     | SYBR Green I | A10           |       |              | 22     |
|       | B11      | Std5        | Gene3     |           | Standard         | 3.200E+1     | SYBR Green I | A11           |       |              | 23     |
|       | B12      | Pos Ctrl    | Gene3     |           | Positive control |              | SYBR Green I | A12           |       |              | 24     |
|       | C1       | Std1        | Gene1     |           | Standard         | 1.000E+6     | SYBR Green I | A1            |       |              | 25     |
|       | C2       | Std3        | Gene1     |           | Standard         | 1.000E+4     | SYBR Green I | A2            |       |              | 26     |
|       | C3       | Std5        | Gene1     |           | Standard         | 1.000E+2     | SYBR Green I | A3            |       |              | 27     |
|       | C4       | Pos Ctrl    | Gene1     |           | Positive control |              | SYBR Green I | A4            |       |              | 28     |

**Figure 70: Table View tab**

For a new experiment, this tab shows the following data:

- ▶ Number and position of a sample.
- ▶ The default sample names *Sample 1* to *Sample 96*.
- ▶ The sample type *Unknown* for all samples.

For detailed information on how to define the reaction properties according to different applications, refer to the *LightCycler® 96 System User Training Guide*.

### 5.2.1 Sample table

The columns in the sample table show the following sample properties. For detailed information on the properties, see sections [Reaction Properties window area](#), on page 145 and [Replicate Group window area](#), on page 147.

| Property                 | Description                                                                                                                                                                                                                                                                                                                                                                                              |
|--------------------------|----------------------------------------------------------------------------------------------------------------------------------------------------------------------------------------------------------------------------------------------------------------------------------------------------------------------------------------------------------------------------------------------------------|
| <i>Color</i>             | Color of the corresponding sample in table cells and graph lines.                                                                                                                                                                                                                                                                                                                                        |
| <i>Position</i>          | Position of the well in the multiwell plate. Each row is allocated a letter from A to H. The wells of a row are numbered from left to right.                                                                                                                                                                                                                                                             |
| <i>Sample Name</i>       | Sample name.                                                                                                                                                                                                                                                                                                                                                                                             |
| <i>Gene Name</i>         | Name of the gene of interest.                                                                                                                                                                                                                                                                                                                                                                            |
| <i>Condition Name</i>    | Only relevant for relative quantification analysis:<br>Condition for grouping the samples according to different conditions during the experiment run.                                                                                                                                                                                                                                                   |
| <i>Sample Type</i>       | Sample type; the following sample types are possible: <ul style="list-style-type: none"> <li>▶ <i>Unknown</i></li> <li>▶ <i>Standard</i></li> <li>▶ <i>Positive control</i></li> <li>▶ <i>Negative control</i></li> <li>▶ <i>Non reverse transcription control</i></li> </ul> For a detailed description of the sample types, see section <a href="#">Reaction Properties window area</a> , on page 145. |
| <i>Concentration</i>     | Only available for sample type <i>Standard</i> :<br>Concentration value for the standard quantity of the gene.                                                                                                                                                                                                                                                                                           |
| <i>Dye</i>               | Name of the associated dye; if multiple dyes are used in one well, the table provides a row with the same number and position for each dye.                                                                                                                                                                                                                                                              |
| <i>Replicate Group</i>   | Replicate group the sample belongs to.                                                                                                                                                                                                                                                                                                                                                                   |
| <i>Notes</i>             | Description of the sample.                                                                                                                                                                                                                                                                                                                                                                               |
| <i>Sample Prep Notes</i> | Notes as specified in imported MagNA Pure 96 sample data files. Operators can edit the displayed text.                                                                                                                                                                                                                                                                                                   |
| <i>Number</i>            | Index number of a well per channel. Index numbers are counted sequentially from left to right and from top to bottom.                                                                                                                                                                                                                                                                                    |

## Sample table shortcut menu

The sample table provides a shortcut menu containing the following commands:

| Command                                  | Description                                                                                                                                                                                                                                                                                                                                                                                                                                                                                                                                                                                                                                                   |
|------------------------------------------|---------------------------------------------------------------------------------------------------------------------------------------------------------------------------------------------------------------------------------------------------------------------------------------------------------------------------------------------------------------------------------------------------------------------------------------------------------------------------------------------------------------------------------------------------------------------------------------------------------------------------------------------------------------|
| <i>Color</i>                             | Opens the color selection dialog box. For detailed information, see section <a href="#">Editing cells</a> , on page 102.                                                                                                                                                                                                                                                                                                                                                                                                                                                                                                                                      |
| <i>Reset Color</i>                       | Resets the color to the default value.                                                                                                                                                                                                                                                                                                                                                                                                                                                                                                                                                                                                                        |
| <i>Export Sample List</i>                | Exports the sample data to a tab-delimited text file (*.txt) or a CSV file (*.csv). For detailed information, see section <a href="#">Exporting the sample list</a> , on page 156.                                                                                                                                                                                                                                                                                                                                                                                                                                                                            |
| <i>Import Sample List</i>                | Imports the sample data provided in a *.txt file or a *.csv file to the sample table. For detailed information, see section <a href="#">Importing sample data</a> , on page 157.                                                                                                                                                                                                                                                                                                                                                                                                                                                                              |
| <i>Copy</i>                              | Copies the selected rows, including the header line, to the clipboard.                                                                                                                                                                                                                                                                                                                                                                                                                                                                                                                                                                                        |
| <i>Paste</i>                             | <p>Pastes the rows from the clipboard onto the selected rows.</p> <p>The rows can be pasted from one of the following sources:</p> <ul style="list-style-type: none"> <li>▶ The current experiment.</li> <li>▶ Another experiment.</li> <li>▶ A Microsoft Excel file (*.xls, *.xlsx) containing a sample list.</li> <li>▶ A text file (*.txt) or a CSV file (*.csv) containing a sample list.</li> </ul> <p> <i>The source files must contain position, dye and header line information matching the position, dye and header line text on the 'Sample Editor' tab.</i></p> |
| <i>Import RealTime Ready Sample List</i> | Imports a RealTime ready sample list. The command opens a file selection dialog box, in which operators can choose a corresponding text file generated for import of target information for RealTime ready Panels.                                                                                                                                                                                                                                                                                                                                                                                                                                            |
| <i>Import MP96 Sample List</i>           | Imports a MagNA Pure 96 sample data file.                                                                                                                                                                                                                                                                                                                                                                                                                                                                                                                                                                                                                     |

### 5.2.2 Exporting the sample list

The sample list of an experiment contains the complete sample data provided on the *Sample Editor* tab. Operators can export these data to a text file or a CSV file that can be opened with a text file editor or imported to a spreadsheet application, for example, Microsoft Excel.

#### To export the sample list

- 1 In the *Sample Editor*, open the *Table View* tab.
- 2 Depending on the file type you want to generate, perform one of the following steps:
  - ▶ On the table shortcut menu, choose *Export Sample List* > *Export to .txt file*.
  - ▶ On the table shortcut menu, choose *Export Sample List* > *Export to .csv file*.

The *Save As* dialog box opens.
- 3 Navigate to the directory where you want to store the sample list file.
 

 *By default, the default experiment directory is displayed. This directory can be specified in the 'Default Directory' dialog box. For detailed information, see section [Preferences](#), on page 134.*
- 4 Enter a name for the sample list file.
 

The LightCycler® 96 Application Software provides a default file name which is identical to the experiment name.
- 5 Choose *Save*. The dialog box closes and the sample data are saved.

### 5.2.3 Importing sample data

The import function allows the operator to import sample data into the samples table.

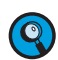

*Importable files must contain position, dye and header line information matching the position, dye and header line text on the 'Sample Editor' tab.*

The data can be imported from one of the following sources:

- ▶ Any text or CSV file containing the information described above (position, dye, header line).
- ▶ A sample list exported from another experiment as a text file (\*.txt) or a CSV file (\*.csv); for detailed information on exporting the sample list, see section [To export the sample list](#), on page 156.
- ▶ A results file exported from the MagNA Pure 96 Software in LightCycler® 96 System readable format (\*.txt or \*.xml).
- ▶ A text file generated for RealTime ready Panels and Custom Panels.

The *Import Sample List* commands on the sample table shortcut menu open the *Import Sample List - Preview* window:

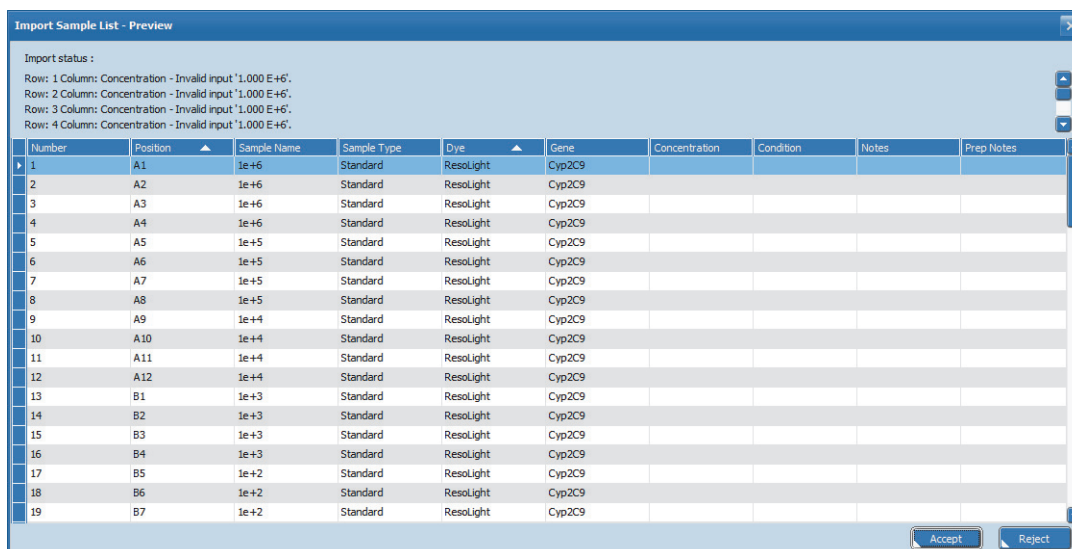

**Figure 71: Import Sample List - Preview**

The preview shows the sample table with the import status and the expected result. Overwritten cells are highlighted.

The buttons below the table perform the following functions:

| Button        | Description                                                           |
|---------------|-----------------------------------------------------------------------|
| <i>Accept</i> | Closes the preview and applies the changes to the corresponding rows. |
| <i>Reject</i> | Closes the preview and discards the changes.                          |

### To import sample data into the sample list

- 1 In the *Sample Editor*, open the *Table View* tab.
- 2 Depending on the file type you want to import, perform one of the following steps:
  - ▶ On the table shortcut menu, choose *Import Sample List > Import from .txt file*.
  - ▶ On the table shortcut menu, choose *Import Sample List > Import from .csv file*.The *Open* dialog box opens.
- 3 Navigate to the directory where the sample list file is stored.

 *By default, the default experiment directory is displayed. This directory can be specified in the 'Default Directory' dialog box. For detailed information, see section [Preferences](#), on page 134.*
- 4 Select the sample list file and choose *Open*.  
The *Import Sample List - Preview* window opens, showing the sample table with the expected results.
- 5 Choose *Accept*.  
The *Import Sample List - Preview* window closes and the data are imported into the sample list.

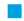

# B

## 6 Raw Data tab

The *Raw Data* tab shows the temperature and optical data collected during an experiment run. The raw data of an experiment contains all instrument corrections, but no color compensation, drift or background correction.

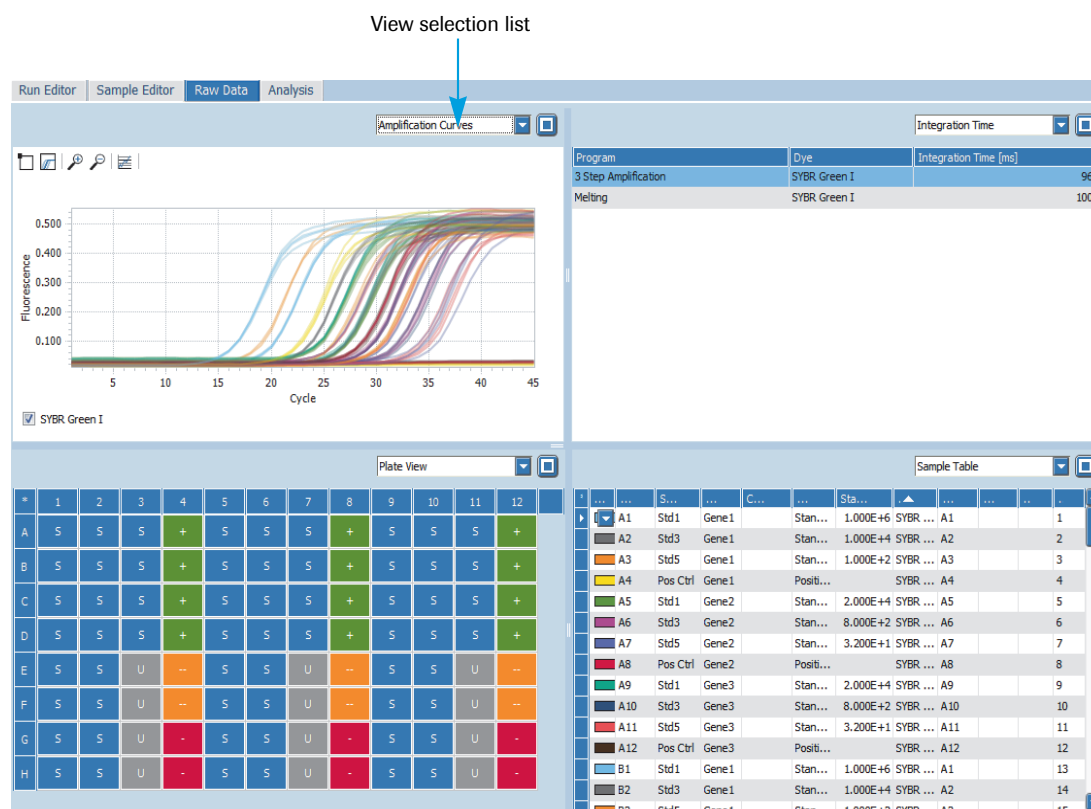

**Figure 72: Raw Data tab**

By default, the *Raw Data* tab shows four sections. For detailed information on changing the number of displayed sections and on resizing the sections, see section [Working with sections](#), on page 112.

All sections on the *Raw Data* tab use the same selection: When the operator selects a curve in one of the graphs or a well in the *Plate View* or *Sample Table*, the same wells are selected in each section.

The view selection list in the sections of the *Raw Data* tab provides the following data:

- ▶ *Plate View*; see section [Plate View](#), on page 160.
- ▶ *Fluorescence Curves*; see section [Fluorescence Curves](#), on page 160.
- ▶ *Melting Curves*; see section [Melting Curves](#), on page 160.  
This option is only available for melting programs.
- ▶ *Amplification Curves*; see section [Amplification Curves](#), on page 161.
- ▶ *Sample Table*; see section [Sample Table](#), on page 161.
- ▶ *Integration Time*; see section [Integration Time](#), on page 161.

## Plate View

The *Plate View* shows the wells as they are laid out in the Sample Editor, allowing operators to select the wells for display. Each well is colored to match the sample type.

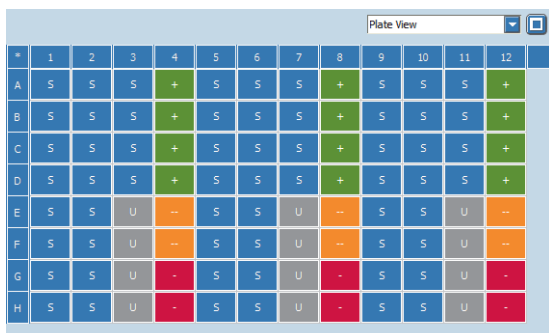

Figure 73: Raw Data tab, Plate View

## Fluorescence Curves

*Fluorescence Curves* display the fluorescence intensity against the time in hours, minutes, and seconds for the entire run. There is one curve for each sample that has a gene labeled with the selected dye.

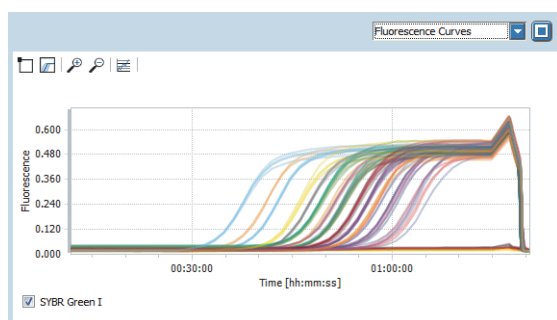

Figure 74: Raw Data tab, Fluorescence Curves

## Melting Curves

*Melting Curves* display the fluorescence intensity against the temperature in °C for a melting program.

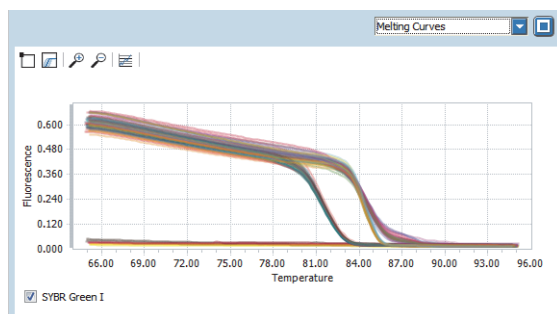

Figure 75: Raw Data tab, Melting Curves

## Amplification Curves

*Amplification Curves* display the fluorescence intensity against the number of cycles in an amplification program. There is one curve for each sample that has a gene labeled with the selected dye.

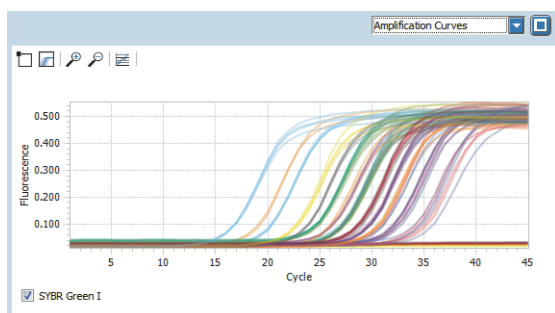

Figure 76: Raw Data tab, Amplification Curves

## Sample Table

The *Sample Table* shows all information of the sample editor *Table View* tab and allows selection of one or more wells to be highlighted in the graphs.

| Well | Standard | Gene  | Concentration | Dye          |
|------|----------|-------|---------------|--------------|
| A1   | Std1     | Gene1 | 1.000E+6      | SYBR ... A1  |
| A2   | Std3     | Gene1 | 1.000E+4      | SYBR ... A2  |
| A3   | Std5     | Gene1 | 1.000E+2      | SYBR ... A3  |
| A4   | Pos Ctrl | Gene1 | Positi...     | SYBR ... A4  |
| A5   | Std1     | Gene2 | 2.000E+4      | SYBR ... A5  |
| A6   | Std3     | Gene2 | 8.000E+2      | SYBR ... A6  |
| A7   | Std5     | Gene2 | 3.200E+1      | SYBR ... A7  |
| A8   | Pos Ctrl | Gene2 | Positi...     | SYBR ... A8  |
| A9   | Std1     | Gene3 | 2.000E+4      | SYBR ... A9  |
| A10  | Std3     | Gene3 | 8.000E+2      | SYBR ... A10 |
| A11  | Std5     | Gene3 | 3.200E+1      | SYBR ... A11 |
| A12  | Pos Ctrl | Gene3 | Positi...     | SYBR ... A12 |
| B1   | Std1     | Gene1 | 1.000E+6      | SYBR ... A1  |
| B2   | Std3     | Gene1 | 1.000E+4      | SYBR ... A2  |
| B3   | Std5     | Gene1 | 1.000E+2      | SYBR ... A3  |

Figure 77: Raw Data tab, Sample Table

For a description of the properties displayed in the table, see section [Sample table](#), on page 155.

## Integration Time

The *Integration Time* table shows the dye-specific integration time for each measuring program.

| Program              | Dye          | Integration Time [ms] |
|----------------------|--------------|-----------------------|
| 3 Step Amplification | SYBR Green I | 714                   |
| Melting              | SYBR Green I | 1000                  |

Figure 78: Raw Data tab, Integration Time table

## 7 Analysis tab

On the *Analysis* tab, operators create an analysis, define analysis settings, and view the calculated results of an experiment run (in this example, the *Analysis* tab for a relative quantification analysis is shown).

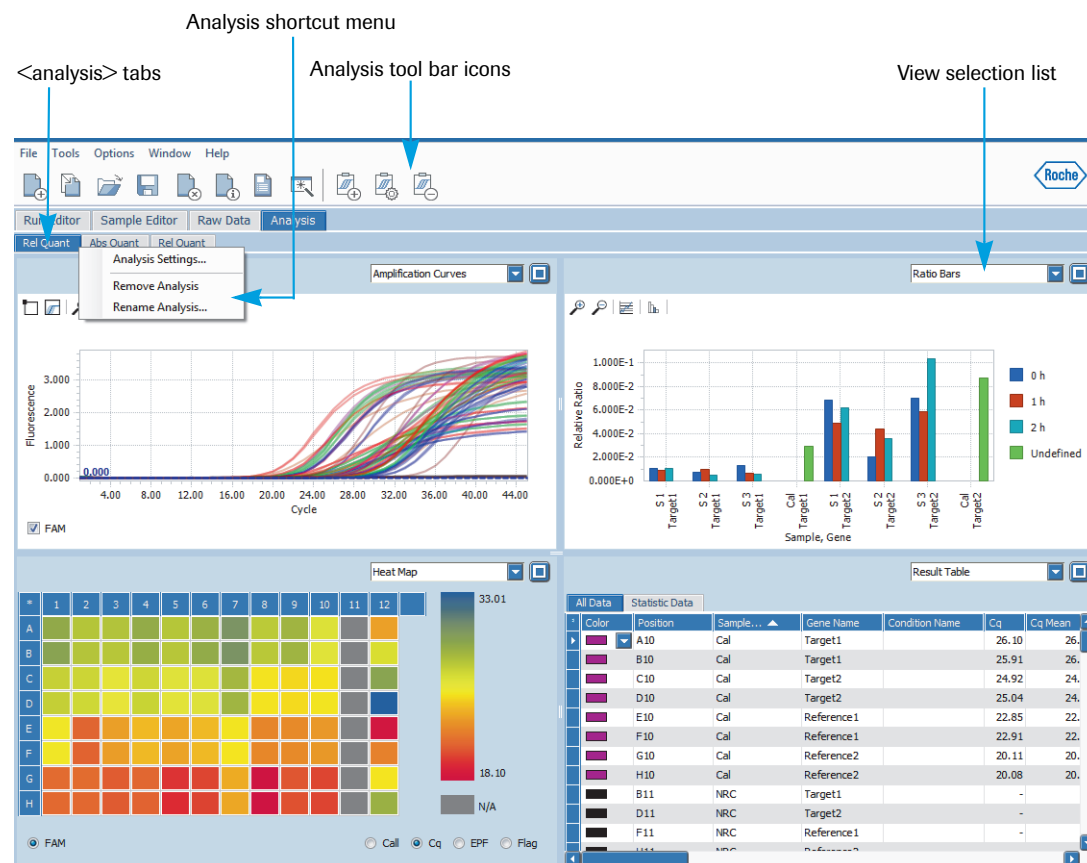

Figure 79: Analysis tab

### <analysis> tabs

The LightCycler® 96 Application Software provides a tab for each analysis added to the experiment. The selected analysis determines the type and contents of the sections on the *Analysis* tab. By default, each <analysis> tab shows four sections. For detailed information on changing the number of displayed sections and on resizing the sections, see section [Working with sections](#), on page 112.

The name of an <analysis> tab can be edited using the *Rename Analysis* command on the analysis shortcut menu. For detailed information, see section [Analysis shortcut menu](#), on page 163.

All sections on the *Analysis* tab use the same selection: When the operator selects a curve in one of the graphs or a well in a *Heat Map* or in the *Sample Table*, the same wells are selected in each section.

## Analysis shortcut menu

Each <analysis> tab provides a shortcut menu. The shortcut menu opens with a right-click on the header of the tab:

| Command                  | Description                                                                                                                                                                                                                                                                                                                                                                                                       |
|--------------------------|-------------------------------------------------------------------------------------------------------------------------------------------------------------------------------------------------------------------------------------------------------------------------------------------------------------------------------------------------------------------------------------------------------------------|
| <i>Analysis Settings</i> | <p>Opens the &lt;analysis&gt; <i>Settings</i> dialog box for specifying the analysis-specific settings. For detailed information, see the descriptions of the corresponding analysis tabs.</p> <p> <i>Changing the analysis settings invalidates the results and, after confirmation, causes an automatic recalculation.</i></p> |
| <i>Remove Analysis</i>   | Removes the analysis from the <i>Analysis</i> tab. The operator is prompted to confirm the action.                                                                                                                                                                                                                                                                                                                |
| <i>Rename Analysis</i>   | Opens the <i>Rename Analysis</i> dialog box to specify a new name for the analysis.                                                                                                                                                                                                                                                                                                                               |

## View selection list

The view selection list in each section of the *Analysis* tab provides the data to be displayed. The available options depend on the selected analysis. For detailed information, see the description of the corresponding analysis.

## Analysis tool bar icons

The following icons in the tool bar are only displayed when the *Analysis* tab is opened:

| Icon                                                                                | Function          | Description                                                                                                                                                                                                                                                                                                                                                                                                                                               |
|-------------------------------------------------------------------------------------|-------------------|-----------------------------------------------------------------------------------------------------------------------------------------------------------------------------------------------------------------------------------------------------------------------------------------------------------------------------------------------------------------------------------------------------------------------------------------------------------|
|  | Add Analysis      | Opens the <i>Create New Analysis</i> dialog box to select a new analysis and edit the name of the corresponding tab. For detailed information, see section <a href="#">Adding a new analysis</a> , on page 164.                                                                                                                                                                                                                                           |
|  | Analysis Settings | <p>Only displayed if at least one analysis is defined:</p> <p>Opens the &lt;analysis&gt; <i>Settings</i> dialog box for specifying the analysis-specific settings. For detailed information, see the descriptions of the corresponding analysis tabs.</p> <p> <i>Changing the analysis settings invalidates the results and causes an automatic recalculation.</i></p> |
|  | Delete Analysis   | <p>Only displayed if at least one analysis is defined:</p> <p>Removes the selected analysis from the experiment.</p>                                                                                                                                                                                                                                                                                                                                      |

Adding a new analysis

The *Add Analysis* icon in the tool bar opens the *Create New Analysis* dialog box:

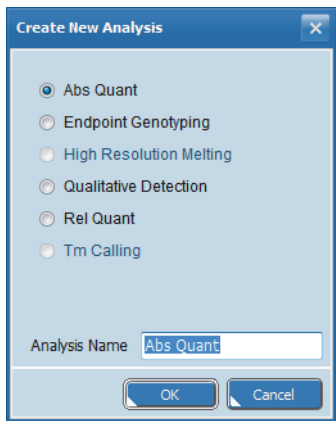

Figure 80: Create New Analysis dialog box

The dialog box allows for selecting a new analysis and specifying the name of the corresponding tab:

| Setting       | Description                                                                             |
|---------------|-----------------------------------------------------------------------------------------|
| <analysis>    | Type of analysis to be added.                                                           |
| Analysis Name | Name of the correspondig tab.<br>By default, the name of the analysis type is provided. |

If multiple melting programs with acquisitions are defined, the *Melting Selection* dialog box opens for selecting the melting program for result calculation.

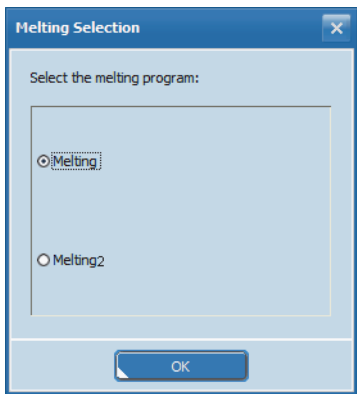

Figure 81: Melting Selection dialog box

## Eliminating positions from the analysis

The LightCycler® 96 Application Software provides functions in three levels for excluding positions from the analysis:

► **Clearing wells:**

The *Clear Wells* function is provided on the *Plate View* tab of the *Sample Editor*. *Clear Wells* eliminates the selected wells from all analyses. Cleared wells are deactivated. This means they can no longer be edited and are not displayed in the table view or the analysis windows.

For detailed information, see section [Clear Wells/Set to Default](#), on page 153.

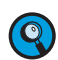

*It is strongly recommended to use the 'Clear Wells' function for all empty wells of LightCycler® 480 Multiwell Plates and for positions not occupied by LightCycler® 8-Tube Strips.*

► **Removing samples, genes, and/or conditions (for relative quantification only):**

The *Remove* function is provided in the *<analysis> Settings* dialog box of the corresponding analyses. Removed samples, genes, or conditions are no longer displayed in tables and charts of the analysis.

For detailed information, see the descriptions of the corresponding analyses.

► **Excluding selected samples from the analysis:**

The *Exclude* function for specified samples is provided in the result tables of the corresponding analyses. Excluding samples can be useful when a sample is clearly an outlier, or if an error has occurred in pipetting or amplification. Excluded samples are displayed in tables and charts, but do not show any result values (for example, C<sub>q</sub> values, T<sub>m</sub> values, or ratios).

For detailed information, see the descriptions of the corresponding analysis result tables.

B

## 7.1 Absolute quantification

Absolute quantification uses a Cq calling algorithm and an algorithm for positive/negative determination. Absolute quantification calculates the concentration based on gene-specific standard curves. For detailed information on absolute quantification, see section [Absolute quantification analysis](#), on page 71. By default, the tab for viewing an absolute quantification analysis is called *Abs Quant*.

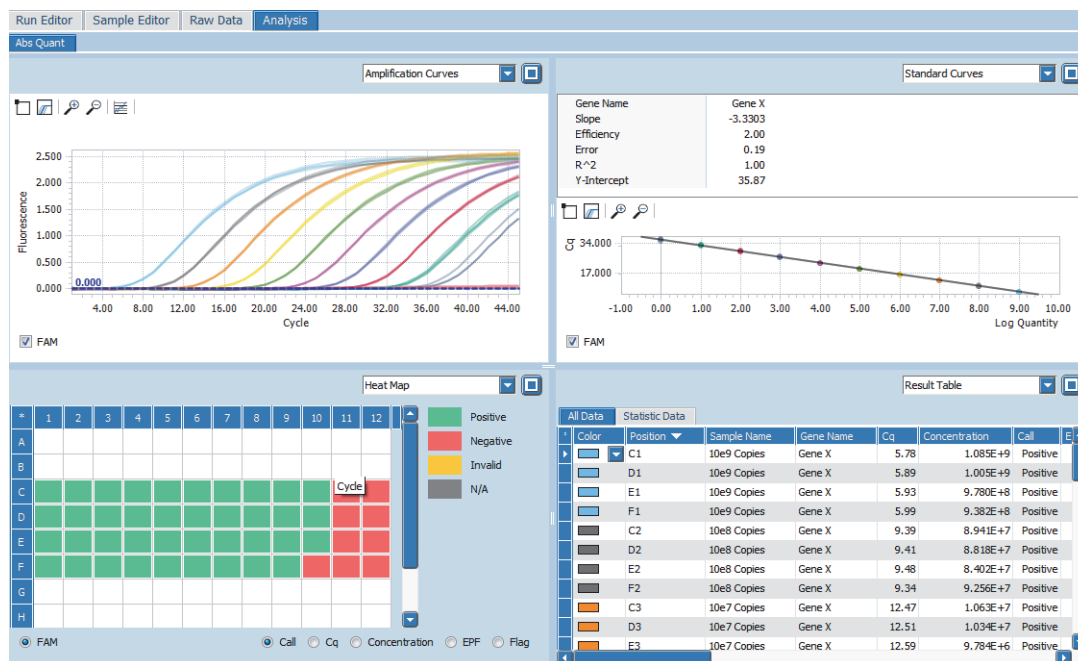

Figure 82: Abs Quant tab

The views selection list in the sections of the *Analysis* tab provides the following data:

- ▶ *Amplification Curves*; see section [Amplification Curves](#), on page 169.
- ▶ *Heat Map*; see section [Heat Map](#), on page 170.
- ▶ *Result Table*; see section [Result Table](#), on page 171.
- ▶ *Standard Curves*; see section [Standard Curves](#), on page 174.
- ▶ *Melting Peaks*; see section [Melting Peaks](#), on page 203.  
This option is only available if a melting program has been performed.
- ▶ *Cq Bars*; see section [Cq Bars](#), on page 175.

### 7.1.1 Abs Quant Settings

The *Abs Quant Settings* dialog box allows operators to specify the analysis-specific settings. The dialog box is accessed via the *Analysis Settings* command on the analysis shortcut menu or by choosing the *Analysis Settings* icon in the tool bar.

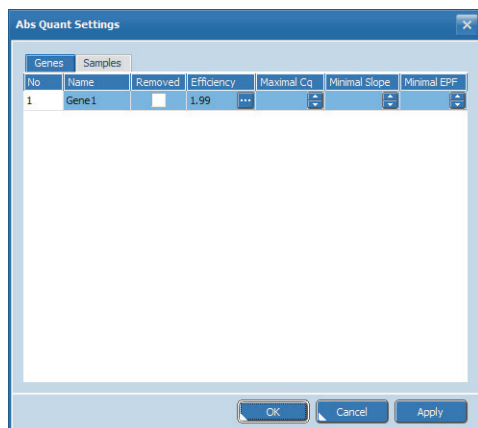

Figure 83: Abs Quant Settings dialog box, Genes tab

Each tab shows a table for editing the gene- or sample-specific settings.

#### Genes tab

| Column               | Setting                                                                                                                                                                                                                                                                                                                                                                                                                                                                                                                                                                                                 |
|----------------------|---------------------------------------------------------------------------------------------------------------------------------------------------------------------------------------------------------------------------------------------------------------------------------------------------------------------------------------------------------------------------------------------------------------------------------------------------------------------------------------------------------------------------------------------------------------------------------------------------------|
| <i>No</i>            | Numbering of the defined genes.                                                                                                                                                                                                                                                                                                                                                                                                                                                                                                                                                                         |
| <i>Name</i>          | Gene name; the genes are listed in the same order as specified in the <i>Sample Editor</i> tab.                                                                                                                                                                                                                                                                                                                                                                                                                                                                                                         |
| <i>Removed</i>       | Removes the gene from the analysis. Removed genes are no longer displayed in tables and charts of the corresponding analysis.<br> <i>It is possible to add or remove multiple genes simultaneously by multi-selecting and using either the 'Add Selected' or 'Remove Selected' command on the shortcut menu of the table.</i>                                                                                                                                                                                        |
| <i>Efficiency</i>    | Efficiency used for calculating efficiency-corrected concentrations.<br>Choosing the browse button in this column opens the <i>Efficiency Editor</i> dialog box for specifying the efficiency to be used: <ul style="list-style-type: none"> <li>▶ <i>E=</i><br/>Only available if no in-run standard curve for the relevant gene is present and if a single standard concentration is defined: The efficiency can be specified manually in the displayed field.<br/>Default value: 2.0</li> <li>▶ <i>E from standard curve</i><br/>The efficiency has been derived from the standard curve.</li> </ul> |
| <i>Maximal Cq</i>    | Specifies the maximum Cq value, that is, the threshold for a positive call. <ul style="list-style-type: none"> <li>▶ For all samples with a Cq value greater than the specified maximum Cq, the Cq values are removed from the result table.</li> <li>▶ The corresponding call status is set to <i>Negative</i>.</li> <li>▶ The <i>Edited Call</i> column in the result table is checked.</li> </ul>                                                                                                                                                                                                    |
| <i>Minimal Slope</i> | Specifies the minimum slope of the amplification curve, that is, the threshold for a positive call. <ul style="list-style-type: none"> <li>▶ For all samples with a slope value less than the specified minimum, the corresponding call status is set to <i>Negative</i>.</li> <li>▶ The resulting Cq value is removed from the result table.</li> <li>▶ The <i>Edited Call</i> column in the result table is checked.</li> </ul>                                                                                                                                                                       |

| Column             | Setting                                                                                                                                                                                                                                                                                                                                                                                                                                                                                                                                                                                                                                                                                                                                                                                                                                                                                                                                                                                                                                                                                                                                 |
|--------------------|-----------------------------------------------------------------------------------------------------------------------------------------------------------------------------------------------------------------------------------------------------------------------------------------------------------------------------------------------------------------------------------------------------------------------------------------------------------------------------------------------------------------------------------------------------------------------------------------------------------------------------------------------------------------------------------------------------------------------------------------------------------------------------------------------------------------------------------------------------------------------------------------------------------------------------------------------------------------------------------------------------------------------------------------------------------------------------------------------------------------------------------------|
| <i>Minimal EPF</i> | <p>Specifies the minimum EPF value, that is, the threshold for a positive call.</p> <p>The minimum value to apply as an EPF threshold corresponds to the predefined fluorescence thresholds, see section <a href="#">Cycle of Quantification (Cq)</a>, on page 69.</p> <ul style="list-style-type: none"> <li>▶ For all samples with an EPF value less than the specified minimum EPF value, the corresponding call status is set to <i>Negative</i>.</li> <li>▶ The resulting Cq value is removed from the result table.</li> <li>▶ The <i>Edited Call</i> column in the result table is checked.</li> </ul> <p> It is also possible to specify the minimum EPF threshold using the slider in the 'Amplification Curves' chart. For detailed information, see section <a href="#">To specify the EPF threshold using the slider</a>, on page 169.</p> <p>The 'Minimal EPF' cannot be lower the threshold value which is used by the Cq algorithm. For detailed information, see section <a href="#">Cycle of Quantification (Cq)</a>, on page 69.</p> |

## Samples tab

The *Samples* tab allows for removing samples from the analysis. Removed samples are no longer displayed in tables and charts of the corresponding analysis.

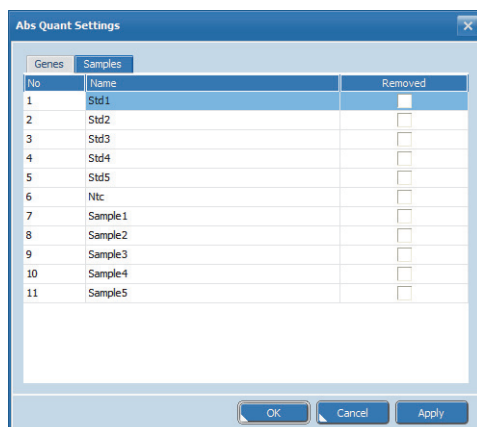

Figure 84: Abs Quant Settings dialog box, Samples tab

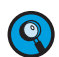

It is possible to add or remove multiple samples simultaneously by multi-selecting and using either the 'Add Selected' or 'Remove Selected' command on the shortcut menu of the table.

### 7.1.2 Amplification Curves

Amplification curves display the fluorescence intensity against the number of cycles in an amplification program. There is one curve for each sample that has a gene labeled with the selected dye. For detailed information on selecting and deselecting curves, zooming, and using the graphs shortcut menu, see section [Working with graphs](#), on page 106.

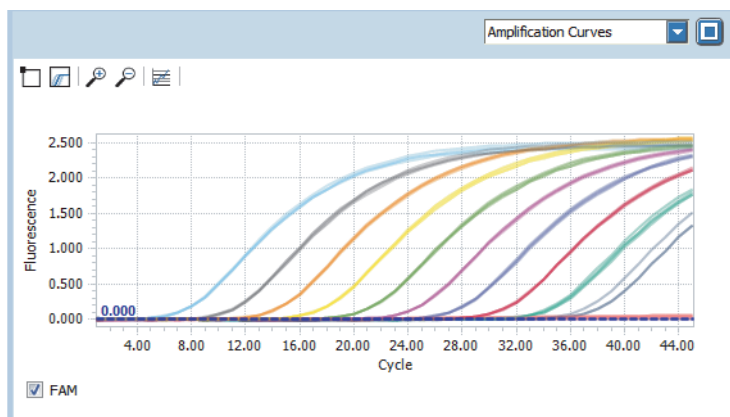

Figure 85: Absolute quantification, Amplification Curves

The selected curves are colored according to the sample type. Selected wells are highlighted. The graph can be filtered by selecting the dye for which the graph is displayed. Since one dye can be used for multiple genes, all genes associated with the dye will be displayed.

#### Minimum EPF threshold

The slider in the amplification curve specifies the minimum EPF threshold for a positive call.

By default, the slider is set to zero and does not determine the positive/negative call. In the default state the positive/negative call is determined by the automated positive/negative filter algorithm. Changing the EPF threshold value overrules the automated positive/negative call and makes the positive/negative calling only dependent on the specified minimum EPF threshold value. For detailed information on the filter algorithm, see section [Positive/negative filter](#), on page 69.

#### To specify the EPF threshold using the slider

- 1 Perform one of the following steps:
  - ▶ Choose the slider in the amplification chart and move it to the appropriate position.
  - ▶ Right-click the amplification chart and choose *Set slider here*.

Moving the slider displays the current fluorescence value.

 *The minimum value to apply as an EPF threshold corresponds to the predefined fluorescence thresholds, see section [Cycle of Quantification \(Cq\)](#), on page 69. You can move the slider to any position in the amplification chart, but you cannot apply a threshold below the fluorescence threshold of the Cq algorithm.*
- 2 Perform one of the following steps:
  - ▶ Right-click the slider and choose *All* on the shortcut menu to apply the threshold to all genes.
  - ▶ Right-click the slider, choose the corresponding dye on the shortcut menu, and then the gene the threshold is to be applied to.

The threshold is applied to the corresponding genes:

  - ▶ For all samples with an EPF value greater than the specified minimum, the corresponding call status is set to *Positive*.
  - ▶ For all samples with an EPF value less than the specified minimum, the corresponding call status is set to *Negative* and the resulting Cq value is removed from the result table.

### 7.1.3 Heat Map

The heat map shows an image of the multiwell plate used in the experiment for the specified channel (in this example, the *C<sub>q</sub>* heat map is shown). For detailed information on displaying the sample properties and using the heat maps shortcut menu, see section [Working with heat maps](#), on page 109.

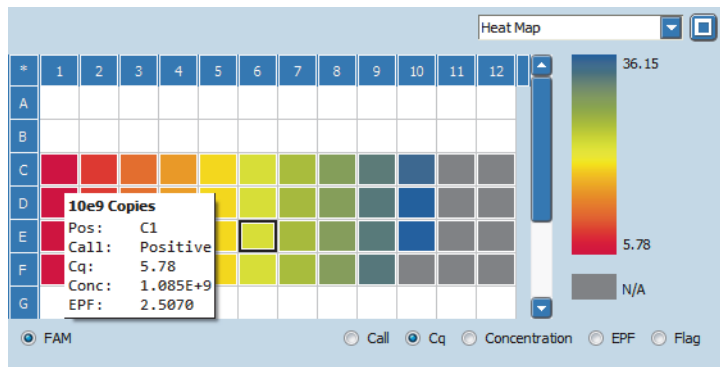

**Figure 86: Absolute quantification, Heat Map**

The heat map has the following options for displaying values:

| Option         | Description                                                                                                                                                                                                                                                                                                                           |
|----------------|---------------------------------------------------------------------------------------------------------------------------------------------------------------------------------------------------------------------------------------------------------------------------------------------------------------------------------------|
| <dye>          | Dye assigned in the corresponding detection format. If you have specified a dual-color or multi-color experiment, the LightCycler® 96 Application Software provides a heat map for each filter combination. For detailed information on how to define a detection format, see section <a href="#">Detection Format</a> , on page 141. |
| Call           | Call status of all samples contained in the sample list. The following values are possible: <ul style="list-style-type: none"> <li>▶ Green: Positive</li> <li>▶ Red: Negative</li> <li>▶ Yellow: Invalid</li> <li>▶ Gray: N/A (not available)</li> </ul>                                                                              |
| C <sub>q</sub> | Quantification cycle values of the samples as a continuous spectrum from red (lowest C <sub>q</sub> ) to blue (highest C <sub>q</sub> ); each well is colored according to the C <sub>q</sub> value called for a particular dye in that well.                                                                                         |
| Concentration  | Concentration values of the samples as a continuous spectrum from red (highest concentration value) to blue (lowest concentration value); each well is colored according to the concentration value calculated for a particular dye in that well.                                                                                     |
| EPF            | EPF values of the samples as a continuous spectrum from red (largest EPF value) to blue (smallest EPF value); each well is colored according to the EPF value called for a particular dye in that well.                                                                                                                               |
| Flag           | Failure status of all samples contained in the sample list. The following values are possible: <ul style="list-style-type: none"> <li>▶ Green: No failure</li> <li>▶ Red: Failure</li> <li>▶ Gray: N/A (not available)</li> </ul>                                                                                                     |

### 7.1.4 Result Table

The result table displays the results of the absolute quantification on two tabs:

- ▶ *All Data* tab, see below.
- ▶ *Statistic Data* tab, see section [Statistic Data tab](#), on page 173.

For detailed information on editing cells and sorting and filtering the table, see section [Working with tables](#), on page 99.

#### All Data tab

Result Table

| All Data | Statistic Data |             |           |       |               |          |
|----------|----------------|-------------|-----------|-------|---------------|----------|
| Color    | Position       | Sample Name | Gene Name | Cq    | Concentration | Call     |
|          | C1             | 10e9 Copies | Gene X    | 5.78  | 1.085E+9      | Positive |
|          | D1             | 10e9 Copies | Gene X    | 5.89  | 1.005E+9      | Positive |
|          | E1             | 10e9 Copies | Gene X    | 5.93  | 9.780E+8      | Positive |
|          | F1             | 10e9 Copies | Gene X    | 5.99  | 9.382E+8      | Positive |
|          | C2             | 10e8 Copies | Gene X    | 9.39  | 8.941E+7      | Positive |
|          | D2             | 10e8 Copies | Gene X    | 9.41  | 8.818E+7      | Positive |
|          | E2             | 10e8 Copies | Gene X    | 9.48  | 8.402E+7      | Positive |
|          | F2             | 10e8 Copies | Gene X    | 9.34  | 9.256E+7      | Positive |
|          | C3             | 10e7 Copies | Gene X    | 12.47 | 1.063E+7      | Positive |
|          | D3             | 10e7 Copies | Gene X    | 12.51 | 1.034E+7      | Positive |
|          | E3             | 10e7 Copies | Gene X    | 12.59 | 9.784E+6      | Positive |

Figure 87: Absolute quantification, All Data tab

The columns of the table have the following meanings:

| Column               | Description                                                                                                                                                                                                                                                                                                                                                                                               |
|----------------------|-----------------------------------------------------------------------------------------------------------------------------------------------------------------------------------------------------------------------------------------------------------------------------------------------------------------------------------------------------------------------------------------------------------|
| <i>Color</i>         | Color coding of the sample. For detailed information on how to change the colors, see section <a href="#">Editing cells</a> , on page 102.                                                                                                                                                                                                                                                                |
| <i>Position</i>      | Position of the well in the multiwell plate. Each row is allocated a letter from A to H. The wells of a row are numbered from 1 to 12 from left to right.                                                                                                                                                                                                                                                 |
| <i>Sample Name</i>   | Name of the sample present in the well.                                                                                                                                                                                                                                                                                                                                                                   |
| <i>Gene Name</i>     | Name of the gene of interest.                                                                                                                                                                                                                                                                                                                                                                             |
| <i>Cq</i>            | Calculated Cq value.<br> <i>The Cq is only displayed for samples with a positive 'Call'.</i>                                                                                                                                                                                                                           |
| <i>Concentration</i> | Calculated concentration of the gene present before amplification.                                                                                                                                                                                                                                                                                                                                        |
| <i>Call</i>          | Calculated positive/negative status. <ul style="list-style-type: none"> <li>▶ Positive:<br/>The fluorescence curve fulfills the criteria for a positive call.</li> <li>▶ Negative:<br/>The fluorescence curve does not fulfill the criteria for a positive call.</li> <li>▶ Invalid:<br/>The fluorescence curve shows a very strong deviation from the expected curve shape (very rare cases).</li> </ul> |
| <i>Excluded</i>      | Specifies whether the sample is excluded from the analysis. By default, all samples are included, so all samples are deselected in the exclusion column. Excluding samples can be useful when a sample is clearly an outlier, or if an error has occurred in pipetting or amplification.                                                                                                                  |
| <i>Sample Type</i>   | Sample type, as defined in the <i>Sample Editor</i> tab; for a detailed description of the sample types, see section <a href="#">Reaction Properties window area</a> , on page 145.                                                                                                                                                                                                                       |

| Column                     | Description                                                                                                                                                                                                                                                                                                                                                                                                                                                                                                                                                                                                                                                                                                                                                                                                                                                                                                                                                               |
|----------------------------|---------------------------------------------------------------------------------------------------------------------------------------------------------------------------------------------------------------------------------------------------------------------------------------------------------------------------------------------------------------------------------------------------------------------------------------------------------------------------------------------------------------------------------------------------------------------------------------------------------------------------------------------------------------------------------------------------------------------------------------------------------------------------------------------------------------------------------------------------------------------------------------------------------------------------------------------------------------------------|
| <i>Standard</i>            | Concentration value for sample of the type <i>Standard</i> .                                                                                                                                                                                                                                                                                                                                                                                                                                                                                                                                                                                                                                                                                                                                                                                                                                                                                                              |
| <i>Cq Mean</i>             | Calculated mean Cq value for the samples in the corresponding replicate group.                                                                                                                                                                                                                                                                                                                                                                                                                                                                                                                                                                                                                                                                                                                                                                                                                                                                                            |
| <i>Cq Error</i>            | Calculated error (standard deviation) for the samples in the corresponding replicate group.                                                                                                                                                                                                                                                                                                                                                                                                                                                                                                                                                                                                                                                                                                                                                                                                                                                                               |
| <i>Concentration Mean</i>  | Calculated mean concentration for the samples in the corresponding replicate group.                                                                                                                                                                                                                                                                                                                                                                                                                                                                                                                                                                                                                                                                                                                                                                                                                                                                                       |
| <i>Concentration Error</i> | Calculated mean deviation for the samples in the corresponding replicate group.                                                                                                                                                                                                                                                                                                                                                                                                                                                                                                                                                                                                                                                                                                                                                                                                                                                                                           |
| <i>Replicate Group</i>     | Master position of the replicate group the sample belongs to.                                                                                                                                                                                                                                                                                                                                                                                                                                                                                                                                                                                                                                                                                                                                                                                                                                                                                                             |
| <i>Dye</i>                 | Name of the associated dye.                                                                                                                                                                                                                                                                                                                                                                                                                                                                                                                                                                                                                                                                                                                                                                                                                                                                                                                                               |
| <i>Edited Call</i>         | Modification status of the sample.<br>This check box is selected when an applied threshold has changed the call status of a sample.                                                                                                                                                                                                                                                                                                                                                                                                                                                                                                                                                                                                                                                                                                                                                                                                                                       |
| <i>Slope</i>               | Calculated slope value; the slope indicates the maximum fluorescence increase between two acquisitions.                                                                                                                                                                                                                                                                                                                                                                                                                                                                                                                                                                                                                                                                                                                                                                                                                                                                   |
| <i>EPF</i>                 | Calculated endpoint fluorescence (EPF value).                                                                                                                                                                                                                                                                                                                                                                                                                                                                                                                                                                                                                                                                                                                                                                                                                                                                                                                             |
| <i>Failure</i>             | <p>Specifies whether a failure occurred during the experiment run. A failure is automatically raised if one or more of the following criteria are met:</p> <ul style="list-style-type: none"> <li>▶ A positive control is negative.</li> <li>▶ A negative control or a non reverse transcription control is positive.</li> <li>▶ A standard is negative.</li> <li>▶ A replicate group contains positive and negative calls.</li> </ul> <p>The operator can define additional failure constraints using the <i>Failure Conditions</i> dialog box in the sample editor. A failure is raised if one or more of these constraints are met. For detailed information, see section <a href="#">Failure Constraints</a>, on page 150.</p> <p> <i>A failure only means a notification for the operator. The corresponding samples are not automatically excluded from the calculation.</i></p> |
| <i>Notes</i>               | Description of the sample.                                                                                                                                                                                                                                                                                                                                                                                                                                                                                                                                                                                                                                                                                                                                                                                                                                                                                                                                                |
| <i>Sample Prep Notes</i>   | Notes as specified in imported MagNA Pure 96 sample data files.                                                                                                                                                                                                                                                                                                                                                                                                                                                                                                                                                                                                                                                                                                                                                                                                                                                                                                           |
| <i>Number</i>              | Index number of a well per channel. Index numbers are counted sequentially from left to right and from top to bottom.                                                                                                                                                                                                                                                                                                                                                                                                                                                                                                                                                                                                                                                                                                                                                                                                                                                     |

## Statistic Data tab

The *Statistic Data* table summarizes all data for samples in replicate groups. The table displays the master positions of replicate groups and all positions not contained in replicate groups:

| Column                        | Description                                                                                                                                                                                                                                                                              |
|-------------------------------|------------------------------------------------------------------------------------------------------------------------------------------------------------------------------------------------------------------------------------------------------------------------------------------|
| <i>Color</i>                  | Color coding of the sample. For detailed information on how to change the colors, see section <a href="#">Editing cells</a> , on page 102.                                                                                                                                               |
| <i>Replicate Group</i>        | Master position of the replicate group the sample belongs to.                                                                                                                                                                                                                            |
| <i>Sample Name</i>            | Name of the sample present in the well.                                                                                                                                                                                                                                                  |
| <i>Gene Name</i>              | Name of the gene of interest.                                                                                                                                                                                                                                                            |
| <i>Cq Mean</i>                | Calculated mean Cq value for the samples in the corresponding replicate group.                                                                                                                                                                                                           |
| <i>Cq Error</i>               | Calculated error (standard deviation) for the samples in the corresponding replicate group.                                                                                                                                                                                              |
| <i>Concentration Mean</i>     | Calculated mean concentration for the samples in the corresponding replicate group.                                                                                                                                                                                                      |
| <i>Concentration Error</i>    | Calculated mean deviation for the samples in the corresponding replicate group.                                                                                                                                                                                                          |
| <i>Sample Type</i>            | Sample type, as defined in the <i>Sample Editor</i> tab; for a detailed description of the sample types, see section <a href="#">Reaction Properties window area</a> , on page 145.                                                                                                      |
| <i>Standard</i>               | Concentration value for sample of the type <i>Standard</i> .                                                                                                                                                                                                                             |
| <i>Excluded</i>               | Specifies whether the sample is excluded from the analysis. By default, all samples are included, so all samples are deselected in the exclusion column. Excluding samples can be useful when a sample is clearly an outlier, or if an error has occurred in pipetting or amplification. |
| <i>Dye</i>                    | Name of the associated dye.                                                                                                                                                                                                                                                              |
| <i>Number</i>                 | Index number of a well per channel. Index numbers are counted sequentially from left to right and from top to bottom.                                                                                                                                                                    |
| <i>Replicate Group Member</i> | Positions of the replicate group members the sample belongs to.                                                                                                                                                                                                                          |
| <i>Failure</i>                | Provides an option showing whether a failure has occurred.                                                                                                                                                                                                                               |

### 7.1.5 Standard Curves

A standard curve displays a graph of C<sub>q</sub> values against the base 10 logarithm of the quantity of each standard. For absolute quantification, the absolute values of the standard curve are used to assign quantities to unknown samples.

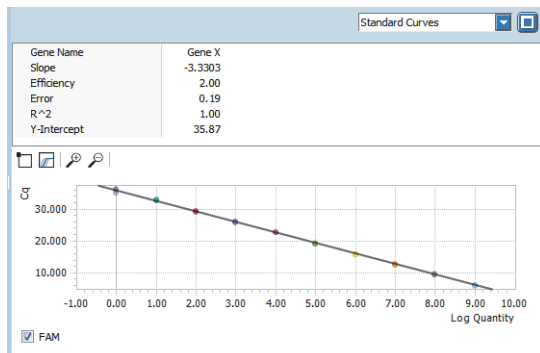

**Figure 88: Absolute quantification, Standard Curves graph**

Standard curves additionally display the following gene-specific values:

- ▶ Gene Name
- ▶ Slope
- ▶ Efficiency
- ▶ Error
- ▶  $R^2$  (correlation coefficient)
- ▶ Y-Intercept

For detailed information on standard curves and the displayed values, see section [Standard curves](#), on page 70.

### 7.1.6 Melting Peaks

A melting peaks chart plots the first negative derivative of the fluorescence decrease ( $-dF/dT$ ) and displays the melting temperatures of the samples as peaks. A melting peaks graph is only available if a melting program has been performed. For detailed information, see section [T<sub>m</sub> calling analysis](#), on page 79.

### 7.1.7 Cq Bars

The *Cq Bars* chart shows the same Cq data as the result table, but in a bar chart format. Each bar represents a Cq value. The *Cq Bars* chart shows the corresponding Cq for each gene and each sample.

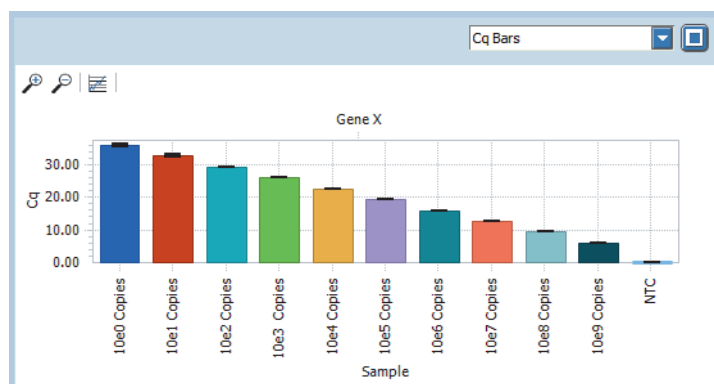

**Figure 89: Absolute quantification, Cq Bars**

The error bars show the Cq errors as displayed in the result table. For detailed information, see section [Error calculation](#), on page 75.

B

## 7.2 Relative quantification

Relative quantification compares the levels of two different gene sequences in a single sample (for example, target gene of interest and a reference gene), and expresses the final result as a ratio of these genes. For detailed information on relative quantification, see section [Relative quantification analysis](#), on page 72. By default, the tab for viewing a relative quantification analysis is called *Rel Quant*.

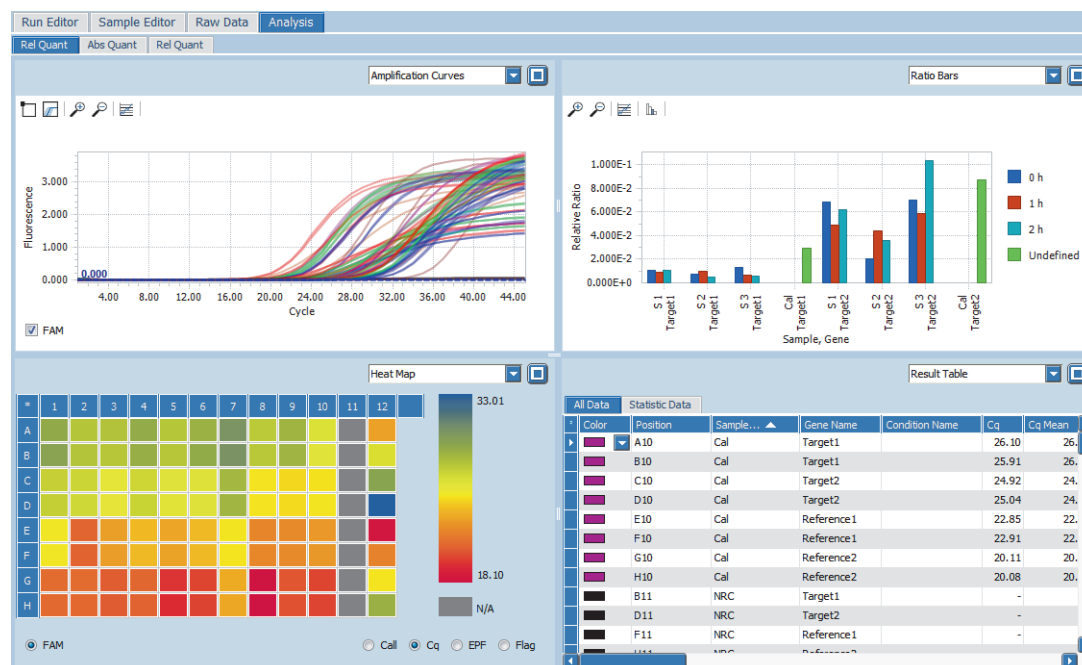

**Figure 90: Rel Quant tab**

The views selection list in the sections of the *Analysis* tab provides the following data:

- ▶ *Amplification Curves*; see section [Amplification Curves](#), on page 169.
- ▶ *Ratio Bars*; see section [Ratio Bars](#), on page 180.
- ▶ *Result Table*; see section [Result Table](#), on page 181.
- ▶ *Standard Curves*; see section [Standard Curves](#), on page 174.
- ▶ *Melting Peaks*; see section [Melting Peaks](#), on page 203.  
This option is only available if a melting program has been performed.
- ▶ *Heat Map*; see section [Heat Map](#), on page 170.
- ▶ *Cq Bars*; see section [Cq Bars](#), on page 175.

## 7.2.1 Rel Quant Settings

The *Rel Quant Settings* dialog box allows operators to specify the analysis-specific settings, particularly the reference gene, run calibrator and study calibrator. The dialog box is displayed when adding a new relative quantification analysis. It is also accessed via the *Analysis Settings* command on the analysis shortcut menu or by choosing the *Analysis Settings* icon in the tool bar.

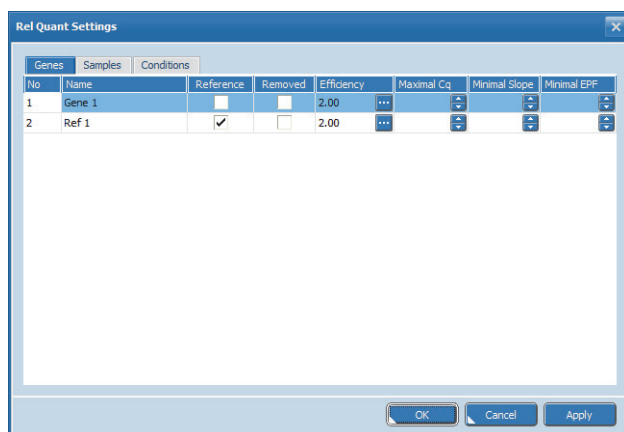

Figure 91: Rel Quant Settings dialog box, Genes tab

Each tab shows a table for editing the gene- or sample-specific settings.

### Genes tab

| Column            | Setting                                                                                                                                                                                                                                                                                                                                                                                                                                                                                                                                                                                                 |
|-------------------|---------------------------------------------------------------------------------------------------------------------------------------------------------------------------------------------------------------------------------------------------------------------------------------------------------------------------------------------------------------------------------------------------------------------------------------------------------------------------------------------------------------------------------------------------------------------------------------------------------|
| <i>No</i>         | Numbering of the defined genes.                                                                                                                                                                                                                                                                                                                                                                                                                                                                                                                                                                         |
| <i>Name</i>       | Gene name; the genes are listed in the same order as specified in the <i>Sample Editor</i> tab.                                                                                                                                                                                                                                                                                                                                                                                                                                                                                                         |
| <i>Reference</i>  | Marks the selected gene as a reference. This gene will be used as a reference, with all other quantities calculated relative to it. For detailed information, see section <a href="#">Normalized ratio</a> , on page 72.                                                                                                                                                                                                                                                                                                                                                                                |
| <i>Removed</i>    | Removes the gene from the analysis. Removed genes are no longer displayed in tables and charts of the corresponding analysis.<br> <i>It is possible to add or remove multiple genes simultaneously by multi-selecting and using either the 'Add Selected' or 'Remove Selected' command on the shortcut menu of the table.</i>                                                                                                                                                                                        |
| <i>Efficiency</i> | Efficiency used for calculating efficiency-corrected concentrations.<br>Choosing the browse button in this column opens the <i>Efficiency Editor</i> dialog box for specifying the efficiency to be used: <ul style="list-style-type: none"> <li>▶ <i>E=</i><br/>Only available if no in-run standard curve for the relevant gene is present and if a single standard concentration is defined: The efficiency can be specified manually in the displayed field.<br/>Default value: 2.0</li> <li>▶ <i>E from standard curve</i><br/>The efficiency has been derived from the standard curve.</li> </ul> |
| <i>Maximal Cq</i> | Specifies the maximum Cq value, that is, the threshold for a positive call. <ul style="list-style-type: none"> <li>▶ The corresponding call status is set to <i>Negative</i>.</li> <li>▶ All result Cq values greater than the specified maximum Cq value are removed from the result table.</li> <li>▶ The <i>Edited Call</i> column in the result table is checked.</li> </ul>                                                                                                                                                                                                                        |

| Column               | Setting                                                                                                                                                                                                                                                                                                                                                                                                                                                                                                                                                                                                                                                                                                                                                                                                                                                                                                                                                                                                                                                         |
|----------------------|-----------------------------------------------------------------------------------------------------------------------------------------------------------------------------------------------------------------------------------------------------------------------------------------------------------------------------------------------------------------------------------------------------------------------------------------------------------------------------------------------------------------------------------------------------------------------------------------------------------------------------------------------------------------------------------------------------------------------------------------------------------------------------------------------------------------------------------------------------------------------------------------------------------------------------------------------------------------------------------------------------------------------------------------------------------------|
| <i>Minimal Slope</i> | <p>Specifies the minimum slope of the amplification curve, that is, the threshold for a positive call.</p> <ul style="list-style-type: none"> <li>▶ For all samples with a slope value less than the specified minimum, the corresponding call status is set to <i>Negative</i>.</li> <li>▶ The resulting Cq value is removed from the result table.</li> <li>▶ The <i>Edited Call</i> column in the result table is checked.</li> </ul>                                                                                                                                                                                                                                                                                                                                                                                                                                                                                                                                                                                                                        |
| <i>Minimal EPF</i>   | <p>Specifies the minimum EPF value, that is, the threshold for a positive call.</p> <p>The minimum value to apply as an EPF threshold corresponds to the predefined fluorescence thresholds, see section <a href="#">Cycle of Quantification (Cq)</a>, on page 69.</p> <ul style="list-style-type: none"> <li>▶ For all samples with an EPF value greater than the specified minimum, the corresponding call status is set to <i>Positive</i>.</li> <li>▶ For all samples with an EPF value less than the specified minimum, the corresponding call status is set to <i>Negative</i> and the resulting Cq value is removed from the result table.</li> <li>▶ The <i>Edited Call</i> column in the result table is checked.</li> </ul> <p> It is also possible to specify the minimum EPF threshold using the slider in the 'Amplification Curves' chart. For detailed information, see section <a href="#">To specify the EPF threshold using the slider</a>, on page 169.</p> |

## Samples tab

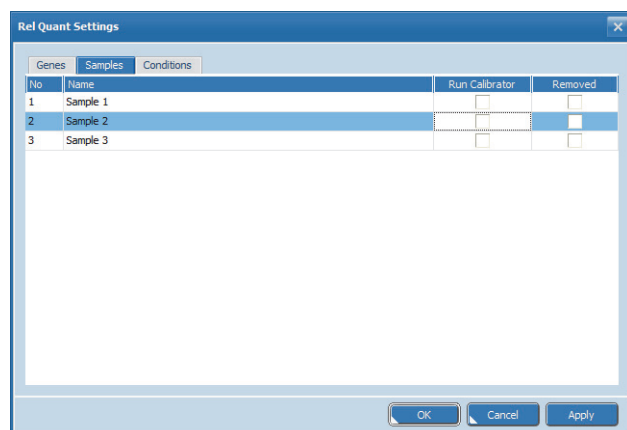

Figure 92: Rel Quant Settings dialog box, Samples tab

| Column                | Setting                                                                                                                                                                                                                                                                                                                                                                                                                    |
|-----------------------|----------------------------------------------------------------------------------------------------------------------------------------------------------------------------------------------------------------------------------------------------------------------------------------------------------------------------------------------------------------------------------------------------------------------------|
| <i>No</i>             | Numbering of the defined samples.                                                                                                                                                                                                                                                                                                                                                                                          |
| <i>Name</i>           | Sample name.                                                                                                                                                                                                                                                                                                                                                                                                               |
| <i>Run Calibrator</i> | <p>Marks the selected sample as the run calibrator. The run calibrator sample is used to normalize all samples within one run. For detailed information, see section <a href="#">Normalized ratio</a>, on page 72.</p> <p> Only samples with the sample types 'Unknown' or 'Positive Control' can be selected as a run calibrator.</p>  |
| <i>Removed</i>        | <p>Removes the sample from the analysis. Removed samples are no longer displayed in tables and charts of the corresponding analysis.</p> <p> It is possible to add or remove multiple samples simultaneously by multi-selecting and using either the 'Add Selected' or 'Remove Selected' command on the shortcut menu of the table.</p> |

## Conditions tab

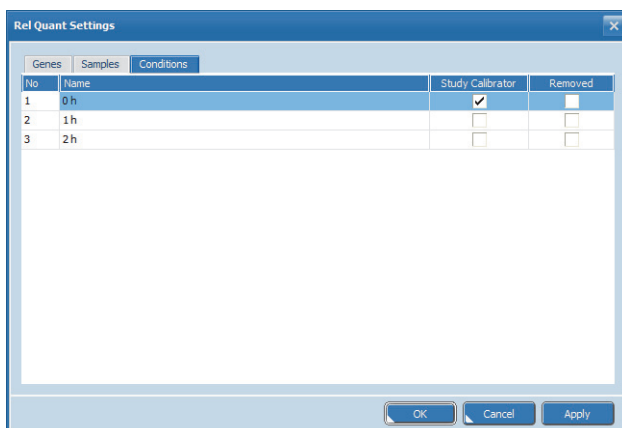

Figure 93: Rel Quant Settings dialog box, Conditions tab

| Column                  | Setting                                                                                                                                                                                                                                                                                                                                                                                                           |
|-------------------------|-------------------------------------------------------------------------------------------------------------------------------------------------------------------------------------------------------------------------------------------------------------------------------------------------------------------------------------------------------------------------------------------------------------------|
| <i>No</i>               | Numbering of the defined conditions.                                                                                                                                                                                                                                                                                                                                                                              |
| <i>Name</i>             | Condition name; the conditions are listed in the same order as specified in the <i>Sample Editor</i> tab. For detailed information, see section <a href="#">Reaction Properties window area</a> , on page 145.                                                                                                                                                                                                    |
| <i>Study Calibrator</i> | Marks the selected condition as the study calibrator. The study calibrator sample is used to normalize all sample-specific measurements to a common basis. For detailed information, see section <a href="#">Scaled ratio</a> , on page 72.                                                                                                                                                                       |
| <i>Removed</i>          | Removes the condition from the analysis. Removed conditions are no longer displayed in tables and charts of the analysis.<br> <i>It is possible to add or remove multiple conditions simultaneously by multi-selecting and using either the 'Add Selected' or 'Remove Selected' command on the shortcut menu of the table.</i> |

### 7.2.2 Amplification Curves

The display of the amplification curves in relative quantification analysis corresponds to their display in absolute quantification analysis. For detailed information, see section [Amplification Curves](#), on page 169.

### 7.2.3 Ratio Bars

The *Ratio Bars* chart shows the same ratio data as the result table, but in a bar chart format. Each bar represents a ratio, a normalized ratio, or a scaled ratio.

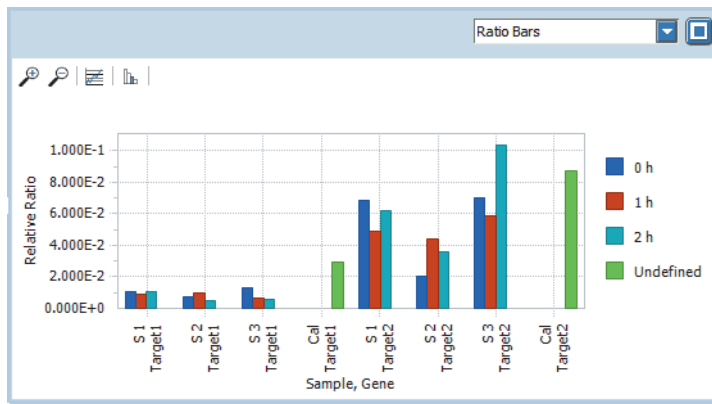

Figure 94: Ratio Bars chart

The *Ratio Bars* chart shows the corresponding ratio, normalized ratio, or scaled ratio for each gene, sample, and condition.

### Data Visualization

The ratios displayed in the *Ratio Bars* chart, as well as how they are scaled and ordered, depend on the settings the operator specifies in the *Data Visualization* dialog box. The dialog box is accessed via the *Data Visualization* command on the chart's shortcut menu or by choosing the *Data Visualization* icon.

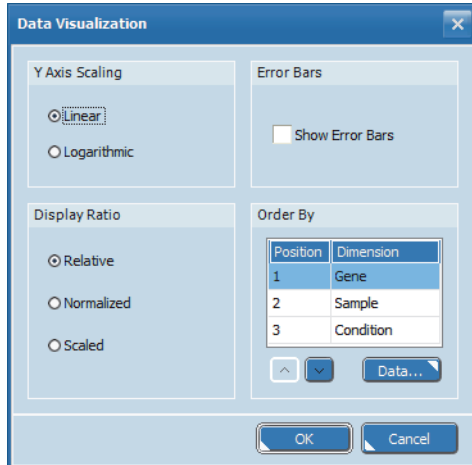

Figure 95: Data Visualization dialog box

| Setting               | Description                                                                                                                                                                                                                                                                                                                                                                                                                                                                                                                                                                                      |
|-----------------------|--------------------------------------------------------------------------------------------------------------------------------------------------------------------------------------------------------------------------------------------------------------------------------------------------------------------------------------------------------------------------------------------------------------------------------------------------------------------------------------------------------------------------------------------------------------------------------------------------|
| <i>Y Axis Scaling</i> | Specifies whether the y-axis is to be scaled linear or logarithmic.<br>By default, the y-axis is scaled linear.                                                                                                                                                                                                                                                                                                                                                                                                                                                                                  |
| <i>Error Bars</i>     | Specifies whether error bars are to be displayed in the <i>Ratio Bars</i> chart. Error bars show ratio errors, normalized ratio errors, or scaled ratio errors as displayed in the result table. For detailed information, see section <a href="#">Relative quantification analysis</a> , on page 72.<br>By default, no error bars are displayed.                                                                                                                                                                                                                                                |
| <i>Display Ratio</i>  | Specifies which ratio is to be displayed in the <i>Ratio Bars</i> chart: <ul style="list-style-type: none"> <li>▶ <i>Relative</i> (default value)<br/>When this option is selected, the chart shows bars for all ratios.</li> <li>▶ <i>Normalized</i><br/>When this option is selected, the chart shows no bars for the run calibrators.</li> <li>▶ <i>Scaled</i><br/>When this option is selected, the chart shows no bars for the study calibrators.</li> </ul> For a detailed description of the different ratios, see section <a href="#">Relative quantification analysis</a> , on page 72. |
| <i>Order By</i>       | Specifies the order for the dimensions to be displayed.<br>Each bar chart allows ordering by gene, sample, or condition. Within each of these property groups, ordering is additionally allowed by name.                                                                                                                                                                                                                                                                                                                                                                                         |

The buttons below the *Order By* area perform the following functions:

| Button         | Description                                                                                               |
|----------------|-----------------------------------------------------------------------------------------------------------|
| <i>Up/Down</i> | Moves the selected property group up or down in the list.                                                 |
| <i>Data</i>    | Opens the <i>Order By Data</i> dialog box, which allows for ordering the selected property group by name. |

#### 7.2.4 Result Table

The result table displays the results of the relative quantification on two tabs:

- ▶ *All Data* tab, see below.
- ▶ *Statistic Data* tab, see section [Statistic Data tab](#), on page 184.

For detailed information on editing cells and sorting and filtering the table, see section [Working with tables](#), on page 99.

## All Data tab



Result Table

| All Data | Statistic Data |             |           |                |       |         |  |
|----------|----------------|-------------|-----------|----------------|-------|---------|--|
| Color    | Position       | Sample Name | Gene Name | Condition Name | Cq    | Cq Mean |  |
|          | A1             | S 1         | Target1   | 0 h            | 28.82 | 29.     |  |
|          | A2             | S 2         | Target1   | 0 h            | 27.51 | 27.     |  |
|          | A3             | S 3         | Target1   | 0 h            | 27.62 | 27.     |  |
|          | A4             | S 1         | Target1   | 1 h            | 28.75 | 28.     |  |
|          | A5             | S 2         | Target1   | 1 h            | 27.46 | 27.     |  |
|          | A6             | S 3         | Target1   | 1 h            | 28.46 | 28.     |  |
|          | A7             | S 1         | Target1   | 2 h            | 30.07 | 30.     |  |
|          | A8             | S 2         | Target1   | 2 h            | 27.24 | 27.     |  |
|          | A9             | S 3         | Target1   | 2 h            | 28.27 | 28.     |  |
|          | A10            | Cal         | Target1   |                | 26.10 | 26.     |  |
|          | A11            | NTC         | Target1   |                | -     |         |  |
|          | A12            | STD 1       | Target1   |                | 23.12 | 23.     |  |

Figure 96: Relative quantification, All Data tab

The columns of the table have the following meanings:

| Column                 | Description                                                                                                                                                                                                                                                                              |
|------------------------|------------------------------------------------------------------------------------------------------------------------------------------------------------------------------------------------------------------------------------------------------------------------------------------|
| <i>Color</i>           | Color coding of the sample. For detailed information on how to change the colors, see section <a href="#">Editing cells</a> , on page 102.                                                                                                                                               |
| <i>Position</i>        | Position of the well in the multiwell plate. Each row is allocated a letter from A to H. The wells of a row are numbered from 1 to 12 from left to right.                                                                                                                                |
| <i>Sample Name</i>     | Name of the sample present in the well.                                                                                                                                                                                                                                                  |
| <i>Gene Name</i>       | Name of the gene of interest.                                                                                                                                                                                                                                                            |
| <i>Condition Name</i>  | Condition name used for grouping the samples according to different conditions during the experiment run.                                                                                                                                                                                |
| <i>Cq</i>              | Calculated Cq value.<br> <i>The Cq is only displayed for samples with a positive call.</i>                                                                                                            |
| <i>Cq Mean</i>         | Calculated mean Cq value for the samples in the corresponding replicate group.                                                                                                                                                                                                           |
| <i>Cq Error</i>        | Calculated error (standard deviation) for the samples in the corresponding replicate group. For detailed information, see section <a href="#">Error calculation</a> , on page 75.                                                                                                        |
| <i>Excluded</i>        | Specifies whether the sample is excluded from the analysis. By default, all samples are included, so all samples are deselected in the exclusion column. Excluding samples can be useful when a sample is clearly an outlier, or if an error has occurred in pipetting or amplification. |
| <i>Sample Type</i>     | Sample type, as defined on the <i>Sample Editor</i> tab; for a detailed description of the sample types, see section <a href="#">Reaction Properties window area</a> , on page 145.                                                                                                      |
| <i>Sample Type RQ</i>  | Specifies whether the sample is used as an unknown sample or as the run calibrator. For detailed information, see section <a href="#">Relative quantification analysis</a> , on page 72.                                                                                                 |
| <i>Gene Type</i>       | Specifies whether the gene is used as a target or reference gene in the calculation of the ratios. For detailed information, see section <a href="#">Relative quantification analysis</a> , on page 72.                                                                                  |
| <i>Condition Type</i>  | Specifies whether the condition is used as the study calibrator for calculating scaled ratios. For detailed information, see section <a href="#">Scaled ratio</a> , on page 72.                                                                                                          |
| <i>Replicate Group</i> | Master position of the replicate group the sample belongs to.                                                                                                                                                                                                                            |

| Column                        | Description                                                                                                                                                                                                                                                                                                                                                                                                                                                                                                                                                                                                                                                                                                                                                                                                                                                                                                                                                        |
|-------------------------------|--------------------------------------------------------------------------------------------------------------------------------------------------------------------------------------------------------------------------------------------------------------------------------------------------------------------------------------------------------------------------------------------------------------------------------------------------------------------------------------------------------------------------------------------------------------------------------------------------------------------------------------------------------------------------------------------------------------------------------------------------------------------------------------------------------------------------------------------------------------------------------------------------------------------------------------------------------------------|
| <i>Ratio</i>                  | Concentration ratio of target and reference. When multiple references are defined, the ratio is calculated based on the arithmetic mean of all reference Cq values. For detailed information, see section <a href="#">Ratio</a> , on page 72.<br>For reference genes, no ratio values are displayed.                                                                                                                                                                                                                                                                                                                                                                                                                                                                                                                                                                                                                                                               |
| <i>Ratio Error</i>            | Ratio error of all target/reference combinations. For detailed information, see section <a href="#">Error calculation</a> , on page 75.                                                                                                                                                                                                                                                                                                                                                                                                                                                                                                                                                                                                                                                                                                                                                                                                                            |
| <i>Normalized Ratio</i>       | Concentration ratio of the target and reference, normalized with the corresponding run calibrator. For detailed information, see section <a href="#">Normalized ratio</a> , on page 72.<br>For run calibrator samples, no normalized ratio values are displayed.                                                                                                                                                                                                                                                                                                                                                                                                                                                                                                                                                                                                                                                                                                   |
| <i>Normalized Ratio Error</i> | Normalized ratio error of all target/reference/run calibrator combinations. For detailed information, see section <a href="#">Error calculation</a> , on page 75.                                                                                                                                                                                                                                                                                                                                                                                                                                                                                                                                                                                                                                                                                                                                                                                                  |
| <i>Scaled Ratio</i>           | Concentration ratio of the target and reference, normalized with the corresponding study calibrator. For detailed information, see section <a href="#">Scaled ratio</a> , on page 72.<br>For study calibrator conditions, no scaled ratio values are displayed.                                                                                                                                                                                                                                                                                                                                                                                                                                                                                                                                                                                                                                                                                                    |
| <i>Scaled Ratio Error</i>     | Scaled ratio error of all target/reference/study calibrator combinations. For detailed information, see section <a href="#">Error calculation</a> , on page 75.                                                                                                                                                                                                                                                                                                                                                                                                                                                                                                                                                                                                                                                                                                                                                                                                    |
| <i>Dye</i>                    | Name of the associated dye.                                                                                                                                                                                                                                                                                                                                                                                                                                                                                                                                                                                                                                                                                                                                                                                                                                                                                                                                        |
| <i>Edited Call</i>            | Modification status of the sample<br>This check box is selected if an applied threshold has changed the call status of a sample.                                                                                                                                                                                                                                                                                                                                                                                                                                                                                                                                                                                                                                                                                                                                                                                                                                   |
| <i>Failure</i>                | Specifies whether a failure occurred during the experiment run. A failure is automatically raised if one or more of the following criteria are met: <ul style="list-style-type: none"> <li>▶ A positive control is negative.</li> <li>▶ A negative control or a non reverse transcription control is positive.</li> <li>▶ A standard is negative.</li> <li>▶ A replicate group contains positive and negative calls.</li> </ul> <p>The operator can define additional failure constraints using the <i>Failure Conditions</i> dialog box in the sample editor. A failure is raised if one or more of these constraints are met. For detailed information, see section <a href="#">Failure Constraints</a>, on page 150.</p> <p> <i>A failure only means a notification for the operator. The corresponding samples are not automatically excluded from the calculation.</i></p> |
| <i>Slope</i>                  | Calculated slope value; the slope indicates the maximum fluorescence increase between two acquisitions.                                                                                                                                                                                                                                                                                                                                                                                                                                                                                                                                                                                                                                                                                                                                                                                                                                                            |
| <i>EPF</i>                    | Calculated endpoint fluorescence (EPF value).                                                                                                                                                                                                                                                                                                                                                                                                                                                                                                                                                                                                                                                                                                                                                                                                                                                                                                                      |
| <i>Notes</i>                  | Description of the sample.                                                                                                                                                                                                                                                                                                                                                                                                                                                                                                                                                                                                                                                                                                                                                                                                                                                                                                                                         |
| <i>Sample Prep Notes</i>      | Notes as specified in imported MagNA Pure 96 sample data files.                                                                                                                                                                                                                                                                                                                                                                                                                                                                                                                                                                                                                                                                                                                                                                                                                                                                                                    |
| <i>Number</i>                 | Index number of a well. Index numbers are counted sequentially from left to right and from top to bottom.                                                                                                                                                                                                                                                                                                                                                                                                                                                                                                                                                                                                                                                                                                                                                                                                                                                          |

**Statistic Data tab**

The *Statistic Data* table summarizes all data for samples in replicate groups. The table displays the master positions of replicate groups and all positions not contained in replicate groups:

| Column                        | Description                                                                                                                                                                                                                                                                                          |
|-------------------------------|------------------------------------------------------------------------------------------------------------------------------------------------------------------------------------------------------------------------------------------------------------------------------------------------------|
| <i>Color</i>                  | Color coding of the sample. For detailed information on how to change the colors, see section <a href="#">Editing cells</a> , on page 102.                                                                                                                                                           |
| <i>Replicate Group Member</i> | Positions of the replicate group members the sample belongs to.                                                                                                                                                                                                                                      |
| <i>Replicate Group</i>        | Master position of the replicate group the sample belongs to.                                                                                                                                                                                                                                        |
| <i>Sample Name</i>            | Name of the sample present in the well.                                                                                                                                                                                                                                                              |
| <i>Gene Name</i>              | Name of the gene of interest.                                                                                                                                                                                                                                                                        |
| <i>Condition Name</i>         | Condition name used for grouping the samples according to different conditions during the experiment run.                                                                                                                                                                                            |
| <i>Ratio</i>                  | Concentration ratio of target and reference. When multiple references are defined, the ratio is calculated based on the arithmetic mean of all reference Cq values. For detailed information, see section <a href="#">Ratio</a> , on page 72.<br>For reference genes, no ratio values are displayed. |
| <i>Ratio Error</i>            | Ratio error of all target/reference combinations. For detailed information, see section <a href="#">Error calculation</a> , on page 75.                                                                                                                                                              |
| <i>Normalized Ratio</i>       | Concentration ratio of the target and reference, normalized with the corresponding run calibrator. For detailed information, see section <a href="#">Normalized ratio</a> , on page 72.<br>For run calibrator samples, no normalized ratio values are displayed.                                     |
| <i>Normalized Ratio Error</i> | Normalized ratio error of all target/reference/run calibrator combinations. For detailed information, see section <a href="#">Error calculation</a> , on page 75.                                                                                                                                    |
| <i>Scaled Ratio</i>           | Concentration ratio of the target and reference, normalized with the corresponding study calibrator. For detailed information, see section <a href="#">Scaled ratio</a> , on page 72.<br>For study calibrator conditions, no scaled ratio values are displayed.                                      |
| <i>Scaled Ratio Error</i>     | Scaled ratio error of all target/reference/study calibrator combinations. For detailed information, see section <a href="#">Error calculation</a> , on page 75.                                                                                                                                      |
| <i>Cq Mean</i>                | Calculated mean Cq value for the samples in the corresponding replicate group.                                                                                                                                                                                                                       |
| <i>Cq Error</i>               | Calculated error (standard deviation) for the samples in the corresponding replicate group. For detailed information, see section <a href="#">Error calculation</a> , on page 75.                                                                                                                    |
| <i>Sample Type</i>            | Sample type, as defined on the <i>Sample Editor</i> tab; for a detailed description of the sample types, see section <a href="#">Reaction Properties window area</a> , on page 145.                                                                                                                  |
| <i>Sample Type RQ</i>         | Specifies whether the sample is used as an unknown sample or as the run calibrator. For detailed information, see section <a href="#">Relative quantification analysis</a> , on page 72.                                                                                                             |
| <i>Gene Type</i>              | Specifies whether the gene is used as a target or reference gene in the calculation of the ratios. For detailed information, see section <a href="#">Relative quantification analysis</a> , on page 72.                                                                                              |
| <i>Condition Type</i>         | Specifies whether the condition is used as the study calibrator for calculating scaled ratios. For detailed information, see section <a href="#">Scaled ratio</a> , on page 72.                                                                                                                      |
| <i>Excluded</i>               | Specifies whether the sample is excluded from the analysis. By default, all samples are included, so all samples are deselected in the exclusion column. Excluding samples can be useful when a sample is clearly an outlier, or if an error has occurred in pipetting or amplification.             |
| <i>Dye</i>                    | Name of the associated dye.                                                                                                                                                                                                                                                                          |
| <i>Failure</i>                | Provides an option showing whether a failure has occurred.                                                                                                                                                                                                                                           |

| Column          | Description                                                                                                                                               |
|-----------------|-----------------------------------------------------------------------------------------------------------------------------------------------------------|
| <i>Position</i> | Position of the well in the multiwell plate. Each row is allocated a letter from A to H. The wells of a row are numbered from 1 to 12 from left to right. |
| <i>Number</i>   | Index number of a well. Index numbers are counted sequentially from left to right and from top to bottom.                                                 |

### 7.2.5 Standard Curves

The display of the standard curves in relative quantification analysis corresponds to their display in absolute quantification analysis. For detailed information, see section [Standard Curves](#), on page 174.

### 7.2.6 Melting Peaks

A melting peaks chart plots the first negative derivative of the fluorescence decrease ( $-dF/dT$ ) and displays the melting temperatures of the samples as peaks. A melting peaks graph is only available if a melting program has been performed. For detailed information, see section [T<sub>m</sub> calling analysis](#), on page 79.

### 7.2.7 Heat Map

The display of the heat maps in relative quantification analysis corresponds to their display in absolute quantification analysis (Exception: the *Concentration* option is not available for relative quantification). For detailed information, see section [Heat Map](#), on page 170.

### 7.2.8 Cq Bars

The display of the Cq bars in relative quantification analysis corresponds to their display in absolute quantification analysis. For detailed information, see section [Cq Bars](#), on page 175.

B

### 7.3 Qualitative Detection

Qualitative detection analyzes the presence of a target nucleic acid in combination with an internal control nucleic acid. The qualitative detection module supports both possible experiment setups:

- ▶ Mono-color setup:  
Target gene and internal control in separate positions.
- ▶ Dual-color or multi-color setup:  
Target gene(s) and internal control in the same position.

For detailed information on qualitative detection, see section [Qualitative detection analysis](#), on page 77. By default, the tab for viewing a qualitative detection analysis is called *Qualitative Detection*.

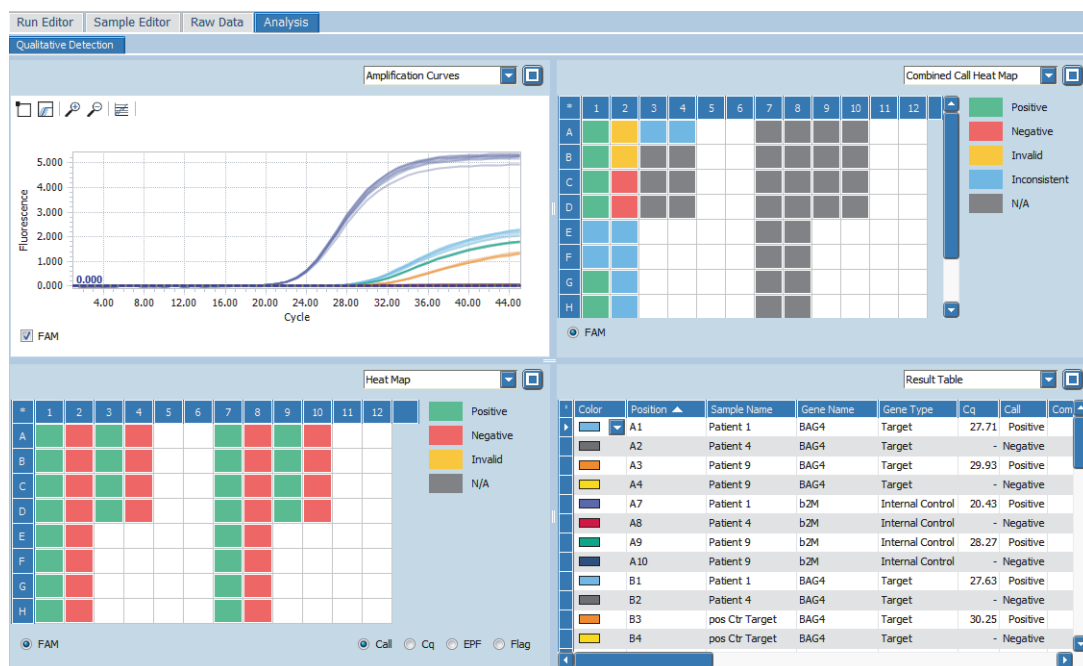

**Figure 97: Qualitative Detection tab**

The views selection list in the sections of the *Analysis* tab provides the following data:

- ▶ *Amplification Curves*; see section [Amplification Curves](#), on page 189.
- ▶ *Heat Map*; see section [Heat Map](#), on page 189.
- ▶ *Combined Call Heat Map*; see section [Combined Call Heat Map](#), on page 190.
- ▶ *Result Table*; see section [Result Table](#), on page 191.

### 7.3.1 Qualitative Detection settings for a dual- or multi-color setup

When target gene(s) and internal control are in the same position, the operator must specify the internal control dye for automated result generation. The *Qualitative Detection* dialog box is displayed when adding a new analysis for a dual- or multi-color experiment.

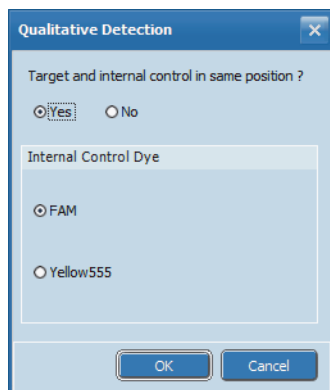

Figure 98: Qualitative Detection dialog box

| Setting                                              | Description                                                                                                                                                                                                                                                                                                                       |
|------------------------------------------------------|-----------------------------------------------------------------------------------------------------------------------------------------------------------------------------------------------------------------------------------------------------------------------------------------------------------------------------------|
| <i>Target and internal control in same position?</i> | Possible values: <ul style="list-style-type: none"> <li>► <b>Yes:</b><br/>Dual- or multi-color setup; the internal control dye is to be specified in the <i>Internal Control Dye</i> window area.</li> <li>► <b>No:</b><br/>Mono-color setup; the options in the <i>Internal Control Dye</i> window area are disabled.</li> </ul> |
| <i>Internal Control Dye</i>                          | List of the dyes as specified in the detection format; the selected dye is used as the internal control dye.                                                                                                                                                                                                                      |

### 7.3.2 Qualitative Detection Settings

The *Qualitative Detection Settings* dialog box allows operators to specify the analysis-specific settings. The dialog box is accessed via the *Analysis Settings* command on the analysis shortcut menu or by choosing the *Analysis Settings* icon in the tool bar.

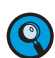

*For a mono-color experiment, it is mandatory to pair target genes and internal controls manually.*

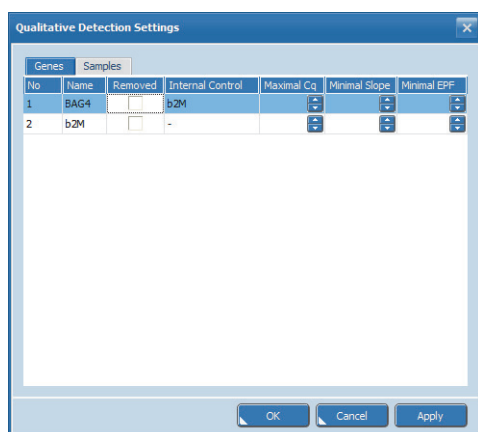

Figure 99: Qualitative Detection Settings dialog box, Genes tab

## Genes tab

| Column                  | Setting                                                                                                                                                                                                                                                                                                                                                                                                                                                                                                                                                                                                                                                                                                                                                                                                                                                                                                                                                                                                                                                                                                                                 |
|-------------------------|-----------------------------------------------------------------------------------------------------------------------------------------------------------------------------------------------------------------------------------------------------------------------------------------------------------------------------------------------------------------------------------------------------------------------------------------------------------------------------------------------------------------------------------------------------------------------------------------------------------------------------------------------------------------------------------------------------------------------------------------------------------------------------------------------------------------------------------------------------------------------------------------------------------------------------------------------------------------------------------------------------------------------------------------------------------------------------------------------------------------------------------------|
| <i>No</i>               | Numbering of the defined genes.                                                                                                                                                                                                                                                                                                                                                                                                                                                                                                                                                                                                                                                                                                                                                                                                                                                                                                                                                                                                                                                                                                         |
| <i>Name</i>             | Target gene name; the genes are listed in the same order as specified on the <i>Sample Editor</i> tab.                                                                                                                                                                                                                                                                                                                                                                                                                                                                                                                                                                                                                                                                                                                                                                                                                                                                                                                                                                                                                                  |
| <i>Removed</i>          | <p>Removes the gene from the analysis. Removed genes are no longer displayed in tables and charts of the corresponding analysis.</p> <p> <i>It is possible to add or remove multiple genes simultaneously by multi-selecting and using either the 'Add Selected' or 'Remove Selected' command on the shortcut menu of the table.</i></p>                                                                                                                                                                                                                                                                                                                                                                                                                                                                                                                                                                                                                                                                                                               |
| <i>Internal Control</i> | <p>Internal control paired with the target gene specified in the <i>Name</i> column. Each internal control gene (from multiple internal controls) can be assigned to one or more selected target genes.</p> <p>To avoid using a gene simultaneously as target and internal control, the following rules apply:</p> <ul style="list-style-type: none"> <li>▶ If a gene is selected as internal control, it is not possible to assign another gene as internal control to this gene.</li> <li>▶ If an internal control is assigned to a target gene, it is not possible to select this target gene as internal control.</li> </ul>                                                                                                                                                                                                                                                                                                                                                                                                                                                                                                        |
| <i>Maximal Cq</i>       | <p>Specifies the maximum Cq value, that is, the threshold for a positive call.</p> <ul style="list-style-type: none"> <li>▶ For all samples with a Cq value greater than the specified maximum Cq, the Cq values are removed from the result table.</li> <li>▶ The corresponding call status is set to <i>Negative</i>.</li> <li>▶ The <i>Edited Call</i> column in the result table is checked.</li> </ul>                                                                                                                                                                                                                                                                                                                                                                                                                                                                                                                                                                                                                                                                                                                             |
| <i>Minimal Slope</i>    | <p>Specifies the minimum slope of the amplification curve, that is, the threshold for a positive call.</p> <ul style="list-style-type: none"> <li>▶ For all samples with a slope value less than the specified minimum, the corresponding call status is set to <i>Negative</i>.</li> <li>▶ The resulting Cq value is removed from the result table.</li> <li>▶ The <i>Edited Call</i> column in the result table is checked.</li> </ul>                                                                                                                                                                                                                                                                                                                                                                                                                                                                                                                                                                                                                                                                                                |
| <i>Minimal EPF</i>      | <p>Specifies the minimum EPF value, that is, the threshold for a positive call.</p> <p>The minimum value to apply as an EPF threshold corresponds to the predefined fluorescence thresholds, see section <a href="#">Cycle of Quantification (Cq)</a>, on page 69.</p> <ul style="list-style-type: none"> <li>▶ For all samples with an EPF value less than the specified value, the corresponding call status is set to <i>Negative</i>.</li> <li>▶ The resulting Cq value is removed from the result table.</li> <li>▶ The <i>Edited Call</i> column in the result table is checked.</li> </ul> <p> <i>It is also possible to specify the minimum EPF threshold using the slider in the 'Amplification Curves' chart. For detailed information, see section <a href="#">To specify the EPF threshold using the slider</a>, on page 169.</i></p> <p><i>The 'Minimal EPF' cannot be lower than the threshold value used by the Cq algorithm. For detailed information, see section <a href="#">Cycle of Quantification (Cq)</a>, on page 69.</i></p> |

## Samples tab

The *Samples* tab allows for removing samples from the analysis. Removed samples are no longer displayed in tables and charts of the corresponding analysis.

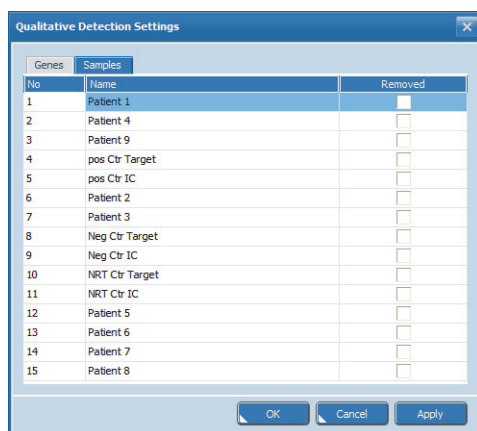

Figure 100: Qualitative Detection Settings dialog box, Samples tab

| Column  | Setting                                                                                                                                                                                                                                                                                                                                                                                                                |
|---------|------------------------------------------------------------------------------------------------------------------------------------------------------------------------------------------------------------------------------------------------------------------------------------------------------------------------------------------------------------------------------------------------------------------------|
| No      | Numbering of the defined samples.                                                                                                                                                                                                                                                                                                                                                                                      |
| Name    | Sample name.                                                                                                                                                                                                                                                                                                                                                                                                           |
| Removed | Removes the sample from the analysis. Removed samples are no longer displayed in tables and charts of the corresponding analysis.<br> <i>It is possible to add or remove multiple samples simultaneously by multi-selecting and using either the 'Add Selected' or 'Remove Selected' command on the shortcut menu of the table.</i> |

### 7.3.3 Amplification Curves

The display of the amplification curves in qualitative detection analysis corresponds to their display in absolute quantification analysis. For detailed information, see section [Amplification Curves](#), on page 169.

### 7.3.4 Heat Map

The display of the heat maps in qualitative detection analysis corresponds to their display in absolute quantification analysis. For detailed information, see section [Heat Map](#), on page 170.

7.3.5 Combined Call Heat Map

A combined call heat map displays the results as a "combined call" by combining individual positive or negative calls of both the target and the internal control.

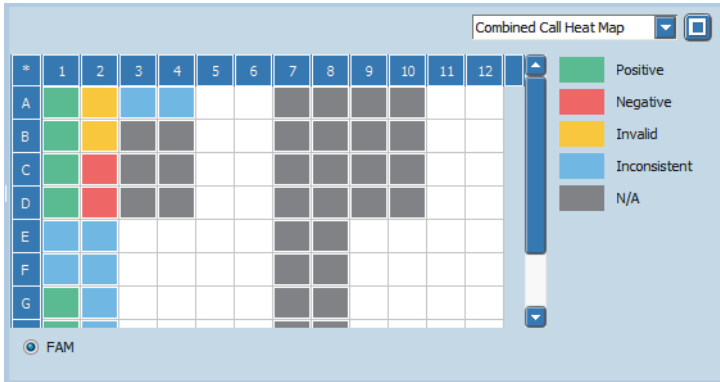

Figure 101: Qualitative Detection, Combined Call Heat Map for a mono-color experiment

The following result types for the combined calls are possible:

| Result type  | Description                                                                                                                                                                                                                                                      |
|--------------|------------------------------------------------------------------------------------------------------------------------------------------------------------------------------------------------------------------------------------------------------------------|
| Positive     | Green: Positive target call, positive or negative internal control call.                                                                                                                                                                                         |
| Negative     | Red: Negative target call, positive internal control call.                                                                                                                                                                                                       |
| Invalid      | Yellow: Negative target call, negative internal control call                                                                                                                                                                                                     |
| Inconsistent | Blue: <ul style="list-style-type: none"><li>▶ Target replicate calls positive and negative, independent of internal control replicate calls, or</li><li>▶ All target replicate calls negative, internal control replicate calls positive and negative.</li></ul> |
| N/A          | Gray: Not available                                                                                                                                                                                                                                              |

A combined call heat map has the following options for displaying values:

| Option | Description                                                                                                                                                                                                                                                                                                                                                                       |
|--------|-----------------------------------------------------------------------------------------------------------------------------------------------------------------------------------------------------------------------------------------------------------------------------------------------------------------------------------------------------------------------------------|
| <dye>  | Dye assigned in the corresponding detection format. If you have specified a dual-color or multi-color experiment, the LightCycler® 96 Application Software provides a combined call heat map for each dye in combination with the internal control dye. For detailed information on how to define a detection format, see section <a href="#">Detection Format</a> , on page 141. |

### 7.3.6 Result Table

The result table displays the results of the qualitative detection analysis. For detailed information on editing cells and sorting and filtering the table, see section [Working with tables](#), on page 99.

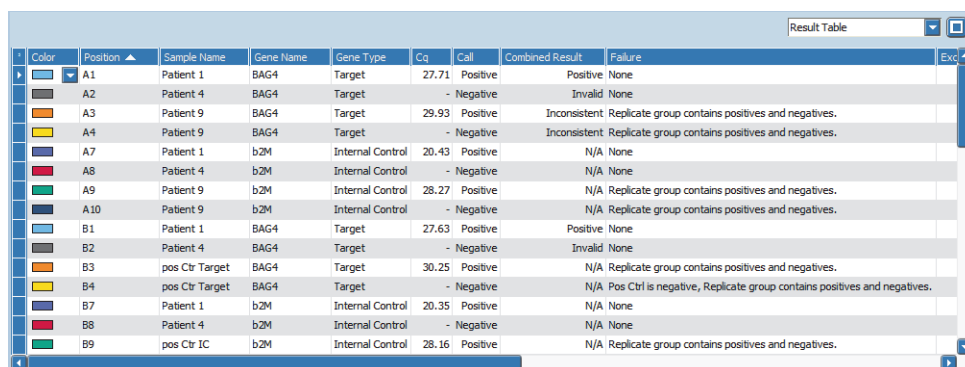

| Color | Position | Sample Name    | Gene Name | Gene Type        | Cq    | Call     | Combined Result | Failure                                                                |
|-------|----------|----------------|-----------|------------------|-------|----------|-----------------|------------------------------------------------------------------------|
|       | A1       | Patient 1      | BAG4      | Target           | 27.71 | Positive | Positive        | None                                                                   |
|       | A2       | Patient 4      | BAG4      | Target           | -     | Negative | Invalid         | None                                                                   |
|       | A3       | Patient 9      | BAG4      | Target           | 29.93 | Positive | Inconsistent    | Replicate group contains positives and negatives.                      |
|       | A4       | Patient 9      | BAG4      | Target           | -     | Negative | Inconsistent    | Replicate group contains positives and negatives.                      |
|       | A7       | Patient 1      | b2M       | Internal Control | 20.43 | Positive | N/A             | None                                                                   |
|       | A8       | Patient 4      | b2M       | Internal Control | -     | Negative | N/A             | None                                                                   |
|       | A9       | Patient 9      | b2M       | Internal Control | 28.27 | Positive | N/A             | Replicate group contains positives and negatives.                      |
|       | A10      | Patient 9      | b2M       | Internal Control | -     | Negative | N/A             | Replicate group contains positives and negatives.                      |
|       | B1       | Patient 1      | BAG4      | Target           | 27.63 | Positive | Positive        | None                                                                   |
|       | B2       | Patient 4      | BAG4      | Target           | -     | Negative | Invalid         | None                                                                   |
|       | B3       | pos Ctr Target | BAG4      | Target           | 30.25 | Positive | N/A             | Replicate group contains positives and negatives.                      |
|       | B4       | pos Ctr Target | BAG4      | Target           | -     | Negative | N/A             | Pos Ctr is negative, Replicate group contains positives and negatives. |
|       | B7       | Patient 1      | b2M       | Internal Control | 20.35 | Positive | N/A             | None                                                                   |
|       | B8       | Patient 4      | b2M       | Internal Control | -     | Negative | N/A             | None                                                                   |
|       | B9       | pos Ctr IC     | b2M       | Internal Control | 28.16 | Positive | N/A             | Replicate group contains positives and negatives.                      |

Figure 102: Qualitative Detection Analysis, Result Table

The columns of the table have the following meanings:

| Column                 | Description                                                                                                                                                                                                                                                                                                                                                                                                                                                                                                                                                                                                                                                                                                                                   |
|------------------------|-----------------------------------------------------------------------------------------------------------------------------------------------------------------------------------------------------------------------------------------------------------------------------------------------------------------------------------------------------------------------------------------------------------------------------------------------------------------------------------------------------------------------------------------------------------------------------------------------------------------------------------------------------------------------------------------------------------------------------------------------|
| <i>Color</i>           | Color coding of the sample. For detailed information on how to change the colors, see section <a href="#">Editing cells</a> , on page 102.                                                                                                                                                                                                                                                                                                                                                                                                                                                                                                                                                                                                    |
| <i>Position</i>        | Position of the well in the multiwell plate. Each row is allocated a letter from A to H. The wells of a row are numbered from 1 to 12 from left to right.                                                                                                                                                                                                                                                                                                                                                                                                                                                                                                                                                                                     |
| <i>Sample Name</i>     | Name of the sample present in the well.                                                                                                                                                                                                                                                                                                                                                                                                                                                                                                                                                                                                                                                                                                       |
| <i>Gene Name</i>       | Name of the gene of interest.                                                                                                                                                                                                                                                                                                                                                                                                                                                                                                                                                                                                                                                                                                                 |
| <i>Gene Type</i>       | Specifies whether the gene is used as a target gene or internal control gene. For detailed information, see section <a href="#">Qualitative detection analysis</a> , on page 77.                                                                                                                                                                                                                                                                                                                                                                                                                                                                                                                                                              |
| <i>Cq</i>              | Calculated Cq value.<br> <i>The Cq is only displayed for samples with a positive call.</i>                                                                                                                                                                                                                                                                                                                                                                                                                                                                                                                                                                 |
| <i>Call</i>            | Calculated positive/negative status. <ul style="list-style-type: none"> <li>▶ <b>Positive:</b><br/>The fluorescence curve fulfills the criteria for a positive call.</li> <li>▶ <b>Negative:</b><br/>The fluorescence curve does not fulfill the criteria for a positive call.</li> <li>▶ <b>Invalid:</b><br/>The fluorescence curve shows a very strong deviation from the expected curve shape (very rare cases).</li> </ul>                                                                                                                                                                                                                                                                                                                |
| <i>Combined Result</i> | Combined call calculated by combining individual positive or negative calls of both the target and the internal control. <ul style="list-style-type: none"> <li>▶ <b>Positive:</b><br/>Positive target call, positive or negative internal control call.</li> <li>▶ <b>Negative:</b><br/>Negative target call, positive internal control call.</li> <li>▶ <b>Invalid:</b><br/>Negative target call, negative internal control call.</li> <li>▶ <b>Inconsistent:</b> <ul style="list-style-type: none"> <li>▶ Target replicate calls positive and negative, independent of internal control replicate calls, or</li> <li>▶ All target replicate calls negative, internal control replicate calls positive and negative.</li> </ul> </li> </ul> |



| Column                   | Description                                                                                                                                                                                                                                                                                                                                                                                                                                                                                                                                                                                                                                                                                                                                                                                                                                                                                                                                                             |
|--------------------------|-------------------------------------------------------------------------------------------------------------------------------------------------------------------------------------------------------------------------------------------------------------------------------------------------------------------------------------------------------------------------------------------------------------------------------------------------------------------------------------------------------------------------------------------------------------------------------------------------------------------------------------------------------------------------------------------------------------------------------------------------------------------------------------------------------------------------------------------------------------------------------------------------------------------------------------------------------------------------|
| <i>Failure</i>           | <p>Specifies whether a failure occurred during the experiment run. A failure is automatically raised if one or more of the following criteria are met:</p> <ul style="list-style-type: none"> <li>▶ A positive control is negative.</li> <li>▶ A negative control or a non reverse transcription control is positive.</li> <li>▶ A standard is negative.</li> <li>▶ A replicate group contains positive and negative calls.</li> </ul> <p>The operator can define additional failure constraints using the <i>Failure Conditions</i> dialog box in the sample editor. A failure is raised if one or more of these constraints are met. For detailed information, see section <a href="#">Failure Constraints</a>, on page 150.</p> <p> <i>A failure only means a notification for the operator. The corresponding samples are not automatically excluded from the calculation.</i></p> |
| <i>Excluded</i>          | <p>Specifies whether the sample is excluded from the analysis. By default, all samples are included, so all samples are deselected in the exclusion column. Excluding samples can be useful when a sample is clearly an outlier, or if an error has occurred in pipetting or amplification.</p>                                                                                                                                                                                                                                                                                                                                                                                                                                                                                                                                                                                                                                                                         |
| <i>Sample Type</i>       | <p>Sample type, as defined on the <i>Sample Editor</i> tab; for a detailed description of the sample types, see section <a href="#">Reaction Properties window area</a>, on page 145.</p>                                                                                                                                                                                                                                                                                                                                                                                                                                                                                                                                                                                                                                                                                                                                                                               |
| <i>Replicate Group</i>   | <p>Master position of the replicate group the sample belongs to.</p>                                                                                                                                                                                                                                                                                                                                                                                                                                                                                                                                                                                                                                                                                                                                                                                                                                                                                                    |
| <i>Dye</i>               | <p>Name of the associated dye.</p>                                                                                                                                                                                                                                                                                                                                                                                                                                                                                                                                                                                                                                                                                                                                                                                                                                                                                                                                      |
| <i>Edited Call</i>       | <p>Modification status of the sample</p> <p>This check box is selected if an applied threshold has changed the call status of a sample.</p>                                                                                                                                                                                                                                                                                                                                                                                                                                                                                                                                                                                                                                                                                                                                                                                                                             |
| <i>Slope</i>             | <p>Calculated slope value; the slope indicates the maximum fluorescence increase between two acquisitions.</p>                                                                                                                                                                                                                                                                                                                                                                                                                                                                                                                                                                                                                                                                                                                                                                                                                                                          |
| <i>EPF</i>               | <p>Calculated endpoint fluorescence (EPF value).</p>                                                                                                                                                                                                                                                                                                                                                                                                                                                                                                                                                                                                                                                                                                                                                                                                                                                                                                                    |
| <i>Notes</i>             | <p>Description of the sample.</p>                                                                                                                                                                                                                                                                                                                                                                                                                                                                                                                                                                                                                                                                                                                                                                                                                                                                                                                                       |
| <i>Sample Prep Notes</i> | <p>Notes as specified in imported MagNA Pure 96 sample data files.</p>                                                                                                                                                                                                                                                                                                                                                                                                                                                                                                                                                                                                                                                                                                                                                                                                                                                                                                  |
| <i>Number</i>            | <p>Index number of a well. Index numbers are counted sequentially from left to right and from top to bottom.</p>                                                                                                                                                                                                                                                                                                                                                                                                                                                                                                                                                                                                                                                                                                                                                                                                                                                        |

## 7.4 Endpoint genotyping

Endpoint genotyping is performed to measure the plateau intensities of two dyes associated with the genotype of a given sample. The plateau in dye intensity is measured as endpoint fluorescence (EPF). To call a genotype for a given sample, the EPF values of a pair of genes are compared. For detailed information on endpoint genotyping, see section [Endpoint genotyping analysis](#), on page 78. By default, the tab for viewing an endpoint genotyping analysis is called *Endpoint Genotyping*.

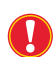

*For endpoint genotyping analysis, it is essential to define identical gene names for both dyes. In the case of different gene names, no endpoint genotyping analysis is possible.*

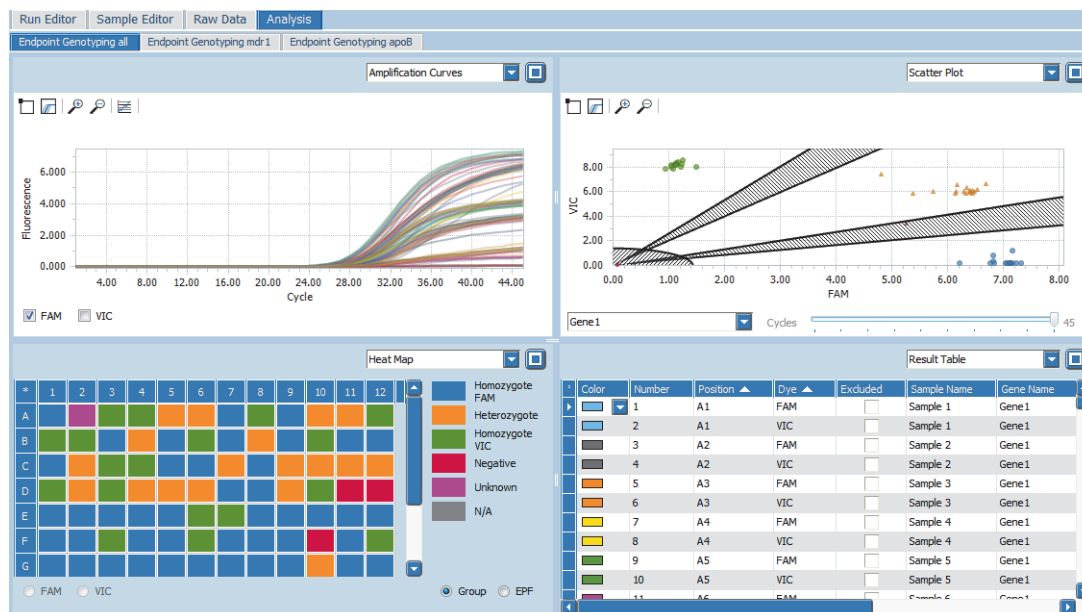

**Figure 103: Endpoint Genotyping tab**

The views selection list in the sections of the *Analysis* tab provides the following data:

- ▶ *Amplification Curves*; see section [Amplification Curves](#), on page 169.
- ▶ *Scatter Plot*; see section [Scatter Plot](#), on page 196.
- ▶ *Heat Map*; see section [Heat Map](#), on page 198.
- ▶ *Result Table*; see section [Result Table](#), on page 199.

7.4.1 Endpoint Genotyping Settings

The *Endpoint Genotyping Settings* dialog box allows operators to specify the analysis-specific settings. The dialog box is accessed via the *Analysis Settings* command on the analysis shortcut menu or by choosing the *Analysis Settings* icon in the tool bar.

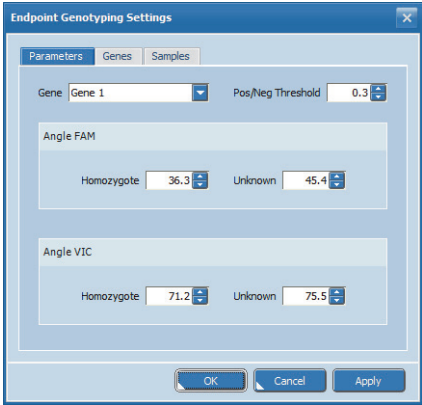

Figure 104: Endpoint Genotyping Settings dialog box, Parameters tab

Parameters tab

The samples are classified into different genotypes by their position relative to thresholds. The settings on the *Parameters* tab allow for specifying these thresholds manually. It is also possible to specify the thresholds using the sliders in the scatter plot. For detailed information, see section [Genotypes](#), on page 196.

| Parameter           |            | Description                                                                                                                                                                                                                |
|---------------------|------------|----------------------------------------------------------------------------------------------------------------------------------------------------------------------------------------------------------------------------|
| Gene                |            | Name of the gene the thresholds are to be applied to.                                                                                                                                                                      |
| Pos./Neg. Threshold |            | Specifies the threshold for negative calls. In the scatter plot, this threshold is displayed as a radius. Any points within this radius of the origin of the graph will be classified as <i>Negative</i> .<br>Default: 0.3 |
| Angle <dye1>        | Homozygote | Specifies the area for samples that are homozygous for <dye1>.                                                                                                                                                             |
|                     | Unknown    | Specifies the area for unknown samples in relation to <i>Homozygote</i> for <dye1>.                                                                                                                                        |
| Angle <dye2>        | Homozygote | Specifies the area for samples that are homozygous for <dye2>.                                                                                                                                                             |
|                     | Unknown    | Specifies the area for unknown samples in relation to <i>Homozygote</i> for <dye2>.                                                                                                                                        |

## Genes tab

The *Genes* tab allows for removing genes from the analysis. Removed genes are no longer displayed in tables and charts of the corresponding analysis.

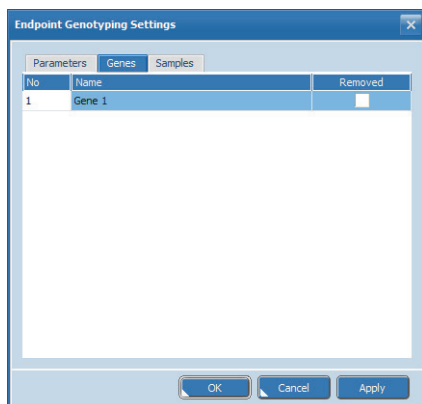

Figure 105: Endpoint Genotyping Settings dialog box, Genes tab

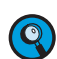

*It is possible to add or remove multiple genes simultaneously by multi-selecting and using either the 'Add Selected' or 'Remove Selected' command on the shortcut menu of the table.*

## Samples tab

The *Samples* tab allows for removing samples from the analysis. Removed samples are no longer displayed in tables and charts of the corresponding analysis.

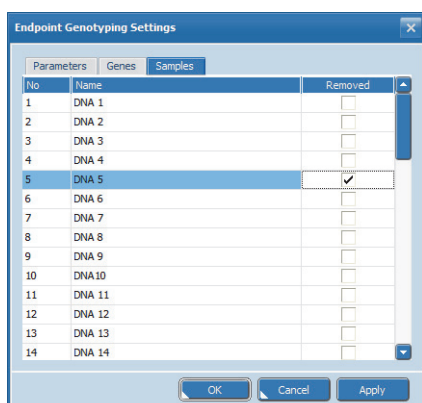

Figure 106: Endpoint Genotyping Settings dialog box, Samples tab

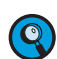

*It is possible to add or remove multiple samples simultaneously by multi-selecting and using either the 'Add Selected' or 'Remove Selected' command on the shortcut menu of the table.*

## 7.4.2 Amplification Curves

The display of the amplification curves in endpoint genotyping analysis corresponds to their display in absolute quantification analysis. For detailed information, see section [Amplification Curves](#), on page 169.

### 7.4.3 Scatter Plot

The *Scatter Plot* chart displays the endpoint fluorescence of the two selected dyes (representing the two alleles). Each point represents a sample, whose x-coordinate is the endpoint fluorescence level of <dye1>, and whose y-coordinate is the endpoint fluorescence level of <dye2>. The software applies the dye with the lower wavelength to the x-axis, the higher wavelength to the y-axis.

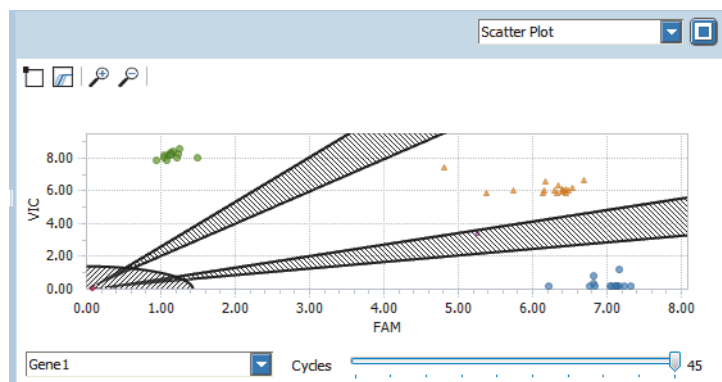

Figure 107: Scatter Plot

The points in the scatter plot are clustered according to the intensity distribution of the two dyes:

- ▶ The top left of the plot is for samples that emit a dominant fluorescence signal with the filter combination selected for <dye2>.
- ▶ The middle is for samples that emit a dominant fluorescence signal with both filter combinations.
- ▶ The bottom right is for samples that emit a dominant fluorescence signal with the filter combination selected for <dye1>.
- ▶ The bottom left, near the origin, consists of samples that emit a weak or no fluorescence signal.

For detailed information on selecting and deselecting, zooming, and using the graphs shortcut menu, see section [Working with graphs](#), on page 106.

#### Gene selection

The scatter plot is displayed gene-specifically, that is, according to the selected gene. This selection specifies the gene that the threshold and angle settings are to be applied to. For detailed information on specifying the thresholds and angle sliders, see section [Genotypes](#), below.

#### Cycles slider

The *Cycles* slider allows the operator to select any cycle as the basis for fluorescence value display.

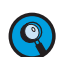

*The 'Cycles' Slider only has a display function to monitor the fluorescence distribution during PCR cycles. It can not be used to change group calls based on the current angle slider or radius slider settings. Group calls are always based on fluorescence distribution of the last measured cycle.*

#### Genotypes

The scatter plot provides sliders to define the areas where no clear identification of the genotypes is expected and thus to manually group the samples:

- ▶ A radius slider to determine the threshold for negative calls. Any points within this radius of the origin of the graph will be classified as *Negative*.
- ▶ Two angle sliders to determine the areas for samples that are homozygous for <dye1> or for <dye2>.
- ▶ Two angle sliders to determine the areas for unknown samples.

The slider settings on the scatter plot correspond to the threshold and angle settings in the *Endpoint Genotyping Settings* dialog box.

The points are displayed differently for each genotype:

- ▶ *Homozygote: <dye1>* has a blue dot.
- ▶ *Homozygote: <dye2>* has a green dot.
- ▶ *Heterozygote* has an orange triangle.
- ▶ *Negative* samples have a red rectangle.
- ▶ *Unknown* samples have a magenta triangle.

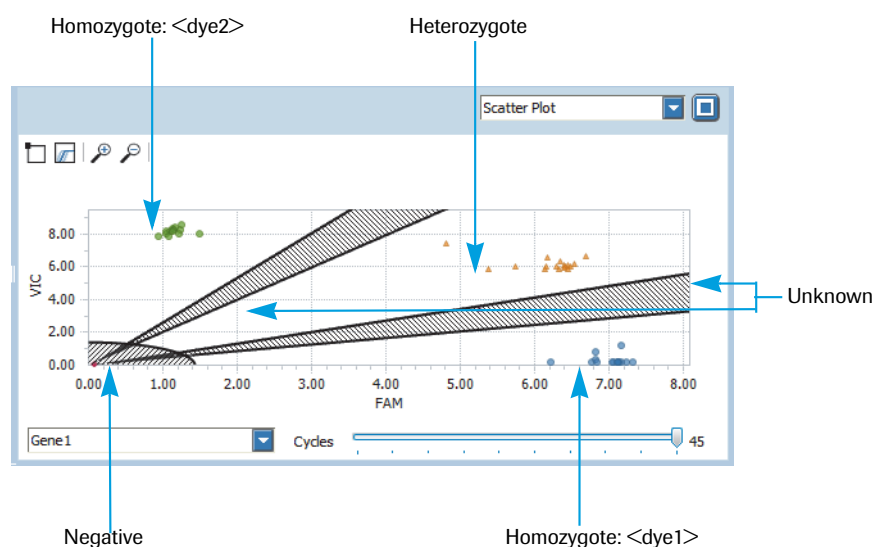

**Figure 108: Scatter Plot, genotypes**

For detailed information on specifying genotype groups in the graph, refer to the *LightCycler® 96 System User Training Guide*.

## Exclude samples

To exclude single samples from the analysis, the scatter plot provides the *Exclude Sample* command on the shortcut menu for each sample.

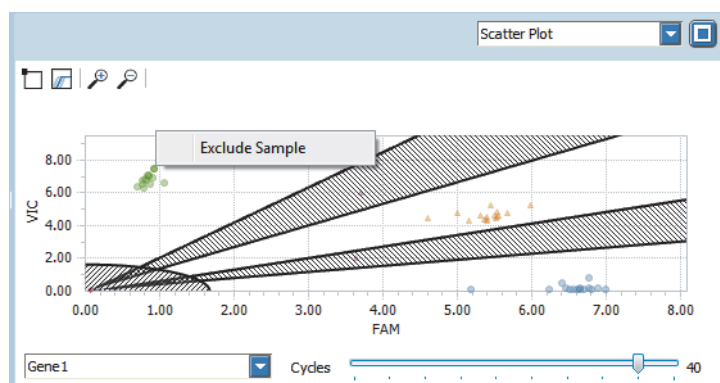

**Figure 109: Scatter plot shortcut menu**

7.4.4 Heat Map

The heat map shows an image of the multiwell plate used in the experiment for the specified gene. For detailed information on displaying the sample properties and using the heat maps shortcut menu, see section *Working with heat maps*, on page 109.

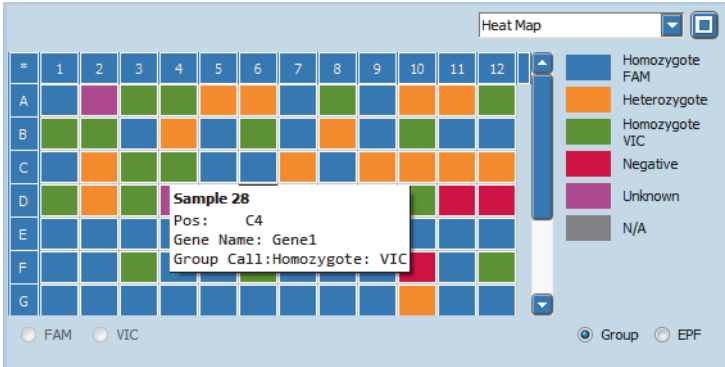

Figure 110: Endpoint genotyping, Heat Map

The heat map has the following options for displaying values:

| Option | Description                                                                                                                                                                                                                                                                                                                                                                                                                                                                      |
|--------|----------------------------------------------------------------------------------------------------------------------------------------------------------------------------------------------------------------------------------------------------------------------------------------------------------------------------------------------------------------------------------------------------------------------------------------------------------------------------------|
| Group  | Genotype the sample is assigned to, according to the threshold and angle settings. <ul style="list-style-type: none"><li>▶ Blue: <i>Homozygote &lt;dye1&gt;</i></li><li>▶ Orange: <i>Heterozygote</i></li><li>▶ Green: <i>Homozygote &lt;dye2&gt;</i></li><li>▶ Red: <i>Negative</i></li><li>▶ Magenta: <i>Unknown</i></li><li>▶ Gray: <i>N/A (not available)</i></li></ul>                                                                                                      |
| EPF    | Endpoint fluorescence values of the samples as a continuous spectrum from red (largest EPF value) to blue (smallest EPF value); each well is colored according to the EPF value called for a particular dye in that well.                                                                                                                                                                                                                                                        |
| <dye>  | <ul style="list-style-type: none"><li>▶ For the <i>Group</i> heat map:<br/>A combined result of both dyes is displayed. The dye selection cannot be changed.</li><li>▶ For the <i>EPF</i> heat map:<br/>Dyes assigned in the corresponding detection format. The LightCycler® 96 Application Software provides a heat map for each filter combination. For detailed information on how to define a detection format, see section <i>Detection Format</i>, on page 141.</li></ul> |

### 7.4.5 Result Table

The result table displays the results of the endpoint genotyping analysis. For detailed information on editing cells and sorting and filtering the table, see section [Working with tables](#), on page 99.

| Color | Position | Sample Name | Gene Name | Genotype        | Dye | Excluded                 | EPF    | Notes |
|-------|----------|-------------|-----------|-----------------|-----|--------------------------|--------|-------|
|       | D6       | Sample 42   | Gene 1    | Heterozygote    | FAM | <input type="checkbox"/> | 6.1602 |       |
|       | D6       | Sample 42   | Gene 1    | Heterozygote    | VIC | <input type="checkbox"/> | 6.0707 |       |
|       | D7       | Sample 43   | Gene 1    | Homozygote: FAM | FAM | <input type="checkbox"/> | 6.8315 |       |
|       | D7       | Sample 43   | Gene 1    | Homozygote: FAM | VIC | <input type="checkbox"/> | 0.7504 |       |
|       | D8       | Sample 44   | Gene 1    | Homozygote: FAM | FAM | <input type="checkbox"/> | 6.7789 |       |
|       | D8       | Sample 44   | Gene 1    | Homozygote: FAM | VIC | <input type="checkbox"/> | 0.1561 |       |
|       | D9       | Sample 45   | Gene 1    | Heterozygote    | FAM | <input type="checkbox"/> | 6.3246 |       |
|       | D9       | Sample 45   | Gene 1    | Heterozygote    | VIC | <input type="checkbox"/> | 5.8511 |       |
|       | D10      | Sample 46   | Gene 1    | Homozygote: VIC | FAM | <input type="checkbox"/> | 1.1324 |       |
|       | D10      | Sample 46   | Gene 1    | Homozygote: VIC | VIC | <input type="checkbox"/> | 8.2839 |       |
|       | D11      | Neg Ctrl    | Gene 1    | Negative        | FAM | <input type="checkbox"/> | -      |       |
|       | D11      | Neg Ctrl    | Gene 1    | Negative        | VIC | <input type="checkbox"/> | -      |       |
|       | D12      | Neg Ctrl    | Gene 1    | Negative        | FAM | <input type="checkbox"/> | -      |       |
|       | D12      | Neg Ctrl    | Gene 1    | Negative        | VIC | <input type="checkbox"/> | -      |       |

Figure 111: Endpoint genotyping, Result Table

The columns of the table have the following meanings:

| Column                   | Description                                                                                                                                                                                                                                                                              |
|--------------------------|------------------------------------------------------------------------------------------------------------------------------------------------------------------------------------------------------------------------------------------------------------------------------------------|
| <i>Color</i>             | Color coding of the sample. For detailed information on how to change the colors, see section <a href="#">Editing cells</a> , on page 102.                                                                                                                                               |
| <i>Number</i>            | Index number of a well per dye. Index numbers are counted sequentially from left to right and from top to bottom.                                                                                                                                                                        |
| <i>Position</i>          | Position of the well in the multiwell plate. Each row is allocated a letter from A to H. The wells of a row are numbered from 1 to 12 from left to right.                                                                                                                                |
| <i>Dye</i>               | Name of the associated dye.                                                                                                                                                                                                                                                              |
| <i>Excluded</i>          | Specifies whether the sample is excluded from the analysis. By default, all samples are included, so all samples are deselected in the exclusion column. Excluding samples can be useful when a sample is clearly an outlier, or if an error has occurred in pipetting or amplification. |
| <i>Sample Name</i>       | Name of the sample present in the well.                                                                                                                                                                                                                                                  |
| <i>Gene Name</i>         | Name of the gene of interest.                                                                                                                                                                                                                                                            |
| <i>EPF</i>               | Endpoint fluorescence value of the corresponding dye.                                                                                                                                                                                                                                    |
| <i>Genotype</i>          | Genotype the sample is assigned to, according to the threshold and angle settings.                                                                                                                                                                                                       |
| <i>Notes</i>             | Description of the sample.                                                                                                                                                                                                                                                               |
| <i>Sample Prep Notes</i> | Notes as specified in imported MagNA Pure 96 sample data files. Operators can edit the displayed text.                                                                                                                                                                                   |

## 7.5 $T_m$ calling

$T_m$  calling is performed on the negative derivative of the melting curve of an amplicon. When working with intercalating fluorescent dyes, it is often useful to have both a quantification analysis of amplification during the cycling program, and a melt analysis. For detailed information on  $T_m$  calling, see section  [\$T\_m\$  calling analysis](#), on page 79. By default, the tab for viewing a melting curve analysis is called *Tm Calling*.

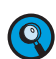

A  $T_m$  calling analysis can only be created if a melting program has been performed.

If multiple melting programs with acquisitions are defined, the 'Melting Selection' dialog box opens for selecting the melting program for result calculation. For detailed information, see section [Adding a new analysis](#), on page 164.

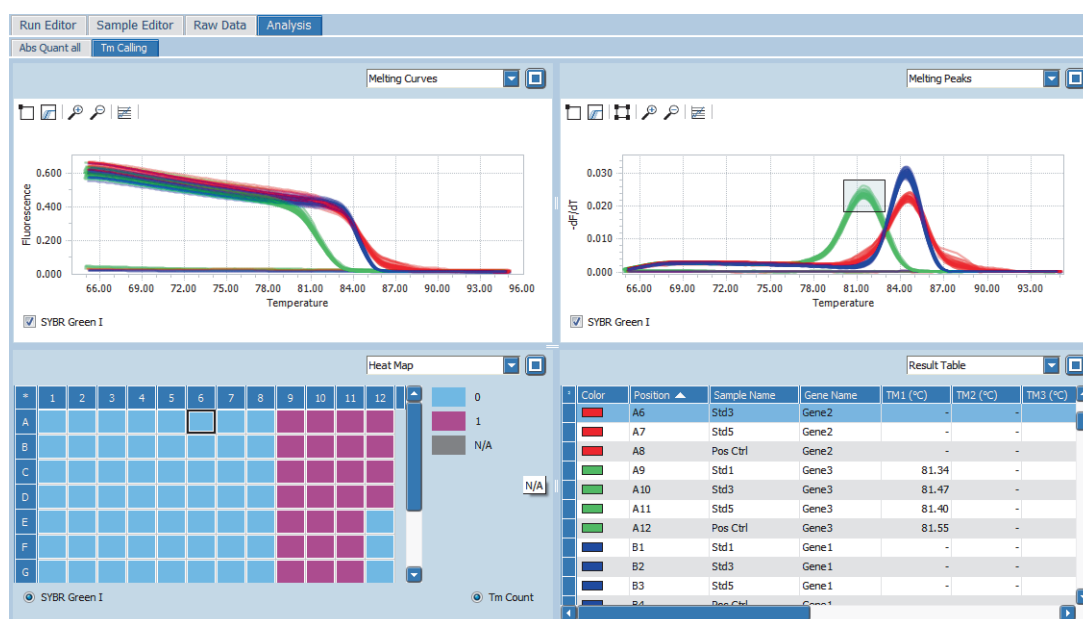

**Figure 112:  $T_m$  Calling tab**

The views selection list in the sections of the *Analysis* tab provides the following data:

- ▶ *Melting Curves*; see section [Melting Curves](#), on page 203.
- ▶ *Melting Peaks*; see section [Melting Peaks](#), on page 203.
- ▶ *Heat Map*; see section [Heat Map](#), on page 204.
- ▶ *Result Table*; see section [Result Table](#), on page 205.
- ▶ *Amplification Curves*; see section [Amplification Curves](#), on page 169.  
This option is only available if an amplification program has been performed.

### 7.5.1 Melting Analysis Parameters

The *Melting Analysis Parameters* dialog box allows operators to specify the analysis-specific settings. The dialog box is accessed via the *Analysis Settings* command on the analysis shortcut menu or by choosing the *Analysis Settings* icon in the tool bar.

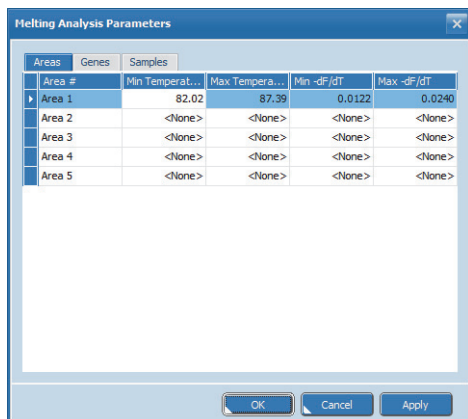

Figure 113: Melting Analysis Parameters dialog box, Areas tab

#### Areas tab

The settings on the *Areas* tab allow for manually specifying areas where melting peaks are to be called. An area is displayed as a rectangle which represents a temperature range and a fluorescence threshold. It is also possible to specify the areas using area marking in the melting peaks graph. For detailed information, see section [Melting peak areas](#), on page 204.

The tab shows a table for editing the area settings:

| Column          | Setting                                                                                                    |
|-----------------|------------------------------------------------------------------------------------------------------------|
| Area #          | Number of the area. The LightCycler® 96 Application Software allows five areas to be defined in one graph. |
| Min Temperature | Lowest value of the temperature range, that is, the left border of the area.                               |
| Max Temperature | Highest value of the temperature range, that is, the right border of the area.                             |
| Min -dF/dT      | Lowest value of the fluorescence range, that is, the bottom border of the area.                            |
| Max -dF/dT      | Highest value of the fluorescence range, that is, the top border of the area.                              |

## Genes tab

The *Genes* tab allows for removing genes from the analysis. Removed genes are no longer displayed in tables and charts of the corresponding analysis.

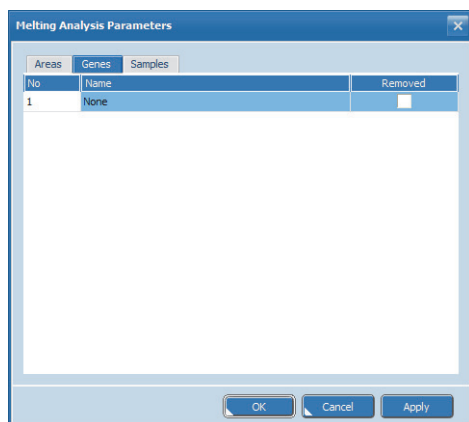

**Figure 114: Melting Analysis Parameters dialog box, Genes tab**

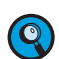

*It is possible to add or remove multiple genes simultaneously by multi-selecting and using either the 'Add Selected' or 'Remove Selected' command on the shortcut menu of the table.*

## Samples tab

The *Samples* tab allows for removing samples from the analysis. Removed samples are no longer displayed in tables and charts of the corresponding analysis.

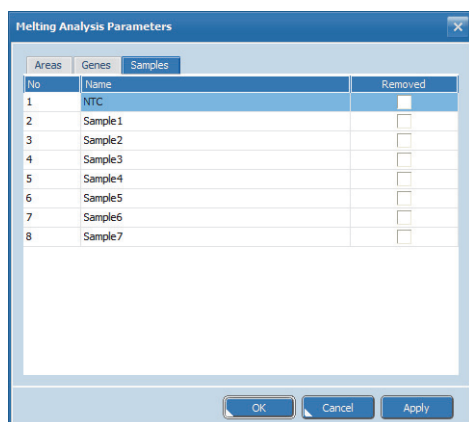

**Figure 115: Melting Analysis Parameters dialog box, Samples tab**

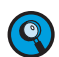

*It is possible to add or remove multiple samples simultaneously by multi-selecting and using either the 'Add Selected' or 'Remove Selected' command on the shortcut menu of the table.*

### 7.5.2 Melting Curves

Melting curves show the raw fluorescence intensity against the temperature in °C. For detailed information on selecting and deselecting curves, zooming, and using the graphs shortcut menu, see section [Working with graphs](#), on page 106.

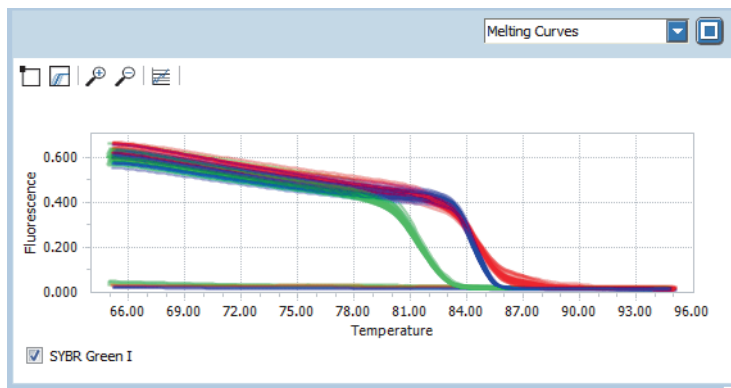

Figure 116: Melting Curves graph

### 7.5.3 Melting Peaks

The melting peaks graph displays the first negative derivative of the fluorescence with respect to the temperature in the melting program ( $-dF/dT$ ). For detailed information on selecting and deselecting curves, zooming, and using the graphs shortcut menu, see section [Working with graphs](#), on page 106.

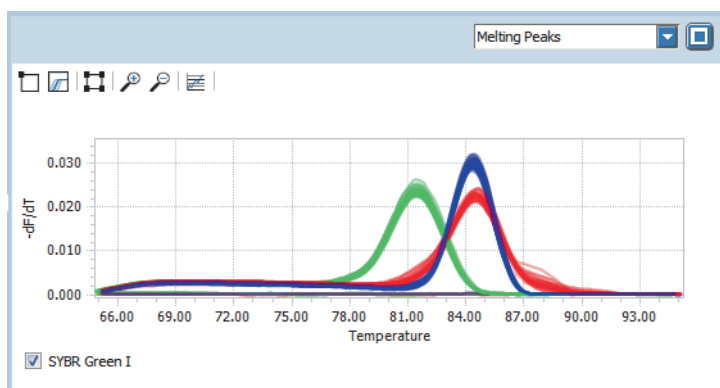

Figure 117: Melting Peaks graph

## Melting peak areas

The melting peaks graph provides a function to mark areas where melting peaks are to be called. An area is displayed as a rectangle which represents a temperature range and a fluorescence threshold. The area settings on the melting peaks graph correspond to the settings in the *Melting Analysis Parameters* dialog box.

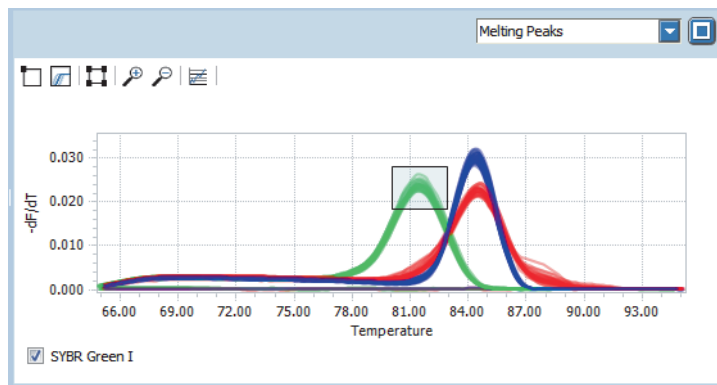

Figure 118: Melting Peaks graph, peak areas

For detailed information on specifying melting peak areas in the graph, refer to the *LightCycler® 96 System User Training Guide*.

### 7.5.4 Heat Map

The heat map shows an image of the multiwell plate used in the experiment for the specified channel. For detailed information on displaying the sample properties and using the heat maps shortcut menu, see section [Working with heat maps](#), on page 109.

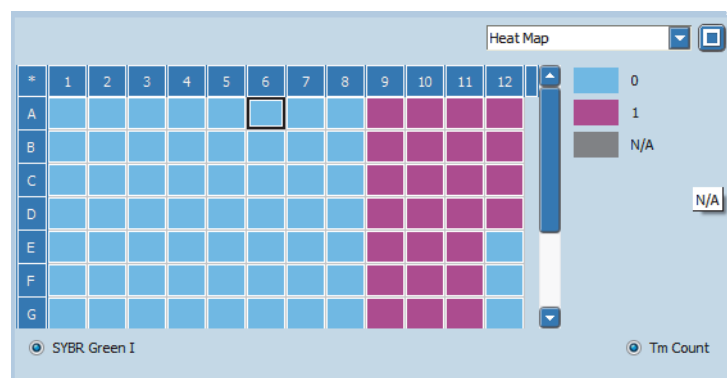

Figure 119:  $T_m$  calling, Heat Map

The heat map has the following options for displaying values:

| Option      | Description                                                                                                                                                                                                                                                                                                                                                                                                                         |
|-------------|-------------------------------------------------------------------------------------------------------------------------------------------------------------------------------------------------------------------------------------------------------------------------------------------------------------------------------------------------------------------------------------------------------------------------------------|
| <dye>       | Dye assigned in the corresponding detection format. If you have specified a dual color experiment, the LightCycler® 96 Application Software provides a heat map for each filter combination. For detailed information on how to define a detection format, see section <a href="#">Detection Format</a> , on page 141.                                                                                                              |
| $T_m$ Count | Number of $T_m$ s called for a sample. The following values are possible: <ul style="list-style-type: none"> <li>▶ Light blue: Zero <math>T_m</math>s</li> <li>▶ Magenta: One <math>T_m</math></li> <li>▶ Mauve: Two <math>T_m</math>s</li> <li>▶ Dark red: Three <math>T_m</math>s</li> <li>▶ Dark gray: Four <math>T_m</math>s</li> <li>▶ Light red: Five <math>T_m</math>s</li> <li>▶ Light gray: N/A (not available)</li> </ul> |

### 7.5.5 Result Table

The result table displays the results of the  $T_m$  calling analysis. For detailed information on editing cells and sorting and filtering the table, see section [Working with tables](#), on page 99.

| Color | Position | Sample Name | Gene Name | TM1 (°C) | TM2 (°C) | TM3 (°C) |
|-------|----------|-------------|-----------|----------|----------|----------|
| Blue  | A4       | Pos Ctrl    | Gene1     | -        | -        | -        |
| Red   | A5       | Std1        | Gene2     | -        | -        | -        |
| Red   | A6       | Std3        | Gene2     | -        | -        | -        |
| Red   | A7       | Std5        | Gene2     | -        | -        | -        |
| Red   | A8       | Pos Ctrl    | Gene2     | -        | -        | -        |
| Green | A9       | Std1        | Gene3     | 81.34    | -        | -        |
| Green | A10      | Std3        | Gene3     | 81.47    | -        | -        |
| Green | A11      | Std5        | Gene3     | 81.40    | -        | -        |
| Green | A12      | Pos Ctrl    | Gene3     | 81.55    | -        | -        |
| Blue  | B1       | Std1        | Gene1     | -        | -        | -        |
| Blue  | B2       | Std3        | Gene1     | -        | -        | -        |
| Blue  | B3       | Std5        | Gene1     | -        | -        | -        |

Figure 120:  $T_m$  calling, Result Table

The columns of the table have the following meanings:

| Column                      | Description                                                                                                                                                                                                                                                                                                                           |
|-----------------------------|---------------------------------------------------------------------------------------------------------------------------------------------------------------------------------------------------------------------------------------------------------------------------------------------------------------------------------------|
| <i>Color</i>                | Color coding of the sample. For detailed information on how to change the colors, see section <a href="#">Editing cells</a> , on page 102.                                                                                                                                                                                            |
| <i>Position</i>             | Position of the well in the multiwell plate. Each row is allocated a letter from A to H. The wells of a row are numbered from 1 to 12 from left to right.                                                                                                                                                                             |
| <i>Dye</i>                  | Name of the associated dye.                                                                                                                                                                                                                                                                                                           |
| <i>Excluded</i>             | Specifies whether the sample is excluded from the analysis. By default, all samples are included, so all samples are deselected in the exclusion column. Excluding samples can be useful when a sample is clearly an outlier, or if an error has occurred in pipetting or amplification.                                              |
| <i>Sample Name</i>          | Name of the sample present in the well.<br> <i>The result table displays no rows for cleared wells, that is, deactivated wells. For detailed information on clearing wells, see section <a href="#">Clear Wells/Set to Default</a>, on page 153.</i> |
| <i>Gene Name</i>            | Name of the gene of interest.                                                                                                                                                                                                                                                                                                         |
| <i>TM1 (°C) to TM5 (°C)</i> | Temperature of the corresponding melting peak maximum according to the area settings in the melting peaks graph. The value is calculated from the maximum call of all corresponding acquisitions.<br>Where no peak is present, the cells are blank.                                                                                   |
| <i>Notes</i>                | Description of the sample.                                                                                                                                                                                                                                                                                                            |
| <i>Sample Prep Notes</i>    | Notes as specified in imported MagNA Pure 96 sample data files.                                                                                                                                                                                                                                                                       |
| <i>Number</i>               | Index number of a well per dye. Index numbers are counted sequentially from left to right and from top to bottom.                                                                                                                                                                                                                     |

### 7.5.6 Amplification Curves

The display of the amplification curves in a  $T_m$  calling analysis corresponds to their display in absolute quantification analysis. An amplification curves graph is only available if an amplification program has been performed. For detailed information, see section [Amplification Curves](#), on page 169.

## 7.6 High Resolution Melting

High resolution melting analysis is performed for analyzing double-stranded PCR products based on their melting behavior with increasing temperatures. The decreasing fluorescence is continuously measured and plotted against increasing temperature. An automated algorithm calculates groups based on the automated normalization and sensitivity settings. For detailed information on high resolution melting, see section [High resolution melting analysis](#), on page 81. By default, the tab for viewing a high resolution melting analysis is called *High Resolution Melting*.

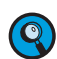

For automated grouping the required minimum number of samples is five. When three groups or more are expected, a minimum of seven samples is recommended.

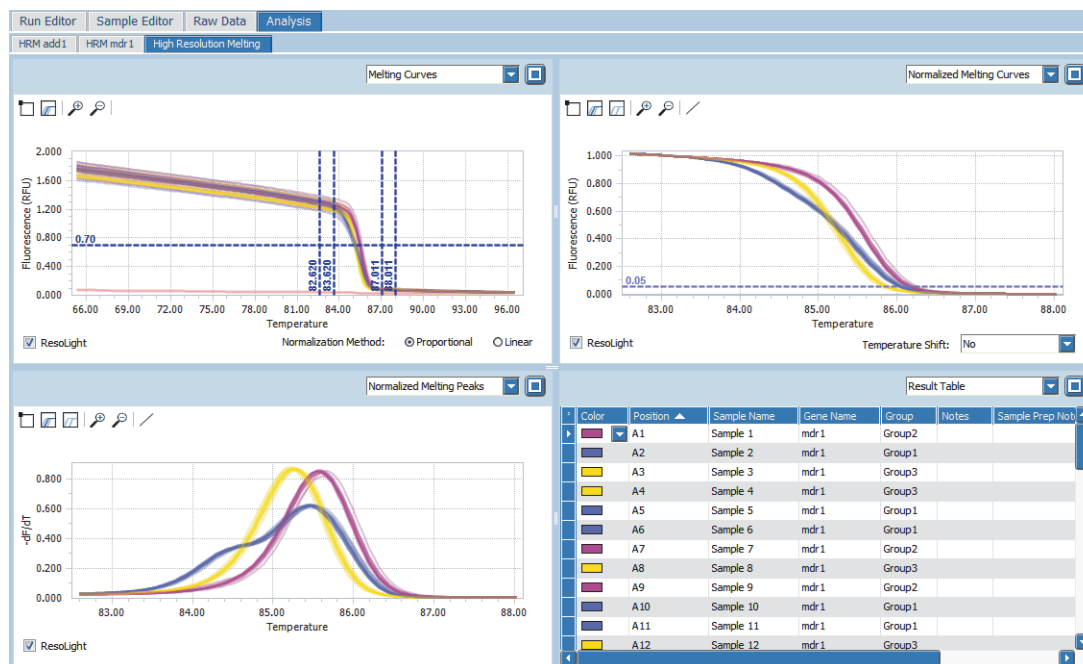

Figure 121: High Resolution Melting tab

The views selection list in the sections of the *Analysis* tab provides the following data:

- ▶ *Melting Curves*; see section [Melting Curves](#), on page 212.
- ▶ *Normalized Melting Curves*; see section [Normalized Melting Curves](#), on page 213.
- ▶ *Normalized Melting Peaks*; see section [Normalized Melting Peaks](#), on page 215.
- ▶ *Difference Plot*; see section [Difference Plot](#), on page 215.
- ▶ *Result Table*; see section [Result Table](#), on page 216.
- ▶ *Heat Map*; see section [Heat Map](#), on page 217.
- ▶ *Amplification Curves*; see section [Amplification Curves](#), on page 217.

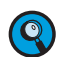

The sample colors in all charts and in the result table are automatically assigned and synchronized according to the group calls generated by automatic algorithm and/or by manual user settings.

7.6.1 Select HRM Gene

If multiple genes are contained in an experiment run, the *Select HRM Gene* dialog box allows operators to select the gene for the analysis, therefore the high resolution melting analysis is gene-specific. The dialog box is displayed when adding a new high resolution melting analysis.

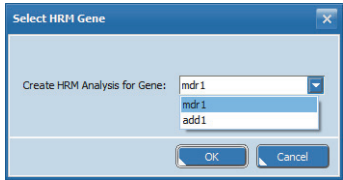

Figure 122: Select HRM Gene dialog box

| Setting                      | Description                                                                                                                           |
|------------------------------|---------------------------------------------------------------------------------------------------------------------------------------|
| Create HRM Analysis for Gene | Gene names contained in the experiment; the list provides all gene names specified on the <i>Sample Editor</i> tab of the experiment. |

7.6.2 High Resolution Melting Settings

The *High Resolution Melting Settings* dialog box allows operators to specify the analysis-specific settings. The dialog box is accessed via the *Analysis Settings* command on the analysis shortcut menu or by choosing the *Analysis Settings* icon in the tool bar.

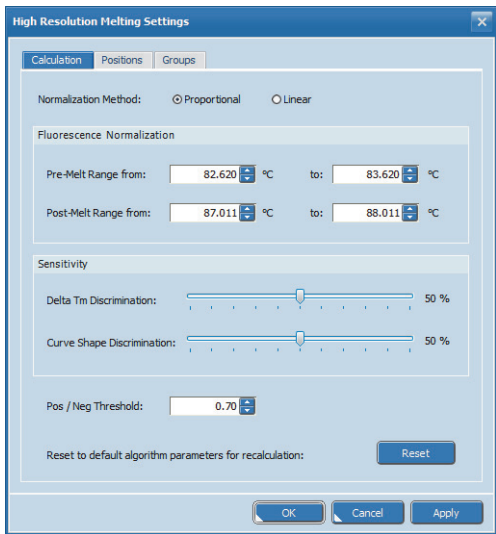

Figure 123: High Resolution Melting Settings dialog box, Calculation tab

## Calculation tab

The settings on the *Calculation* tab allow for manually specifying the positive/negative threshold, the temperature ranges specifying the normalization areas, and the sensitivity settings for the automatic algorithm. When the settings for the positive/negative threshold, normalization and sensitivity are changed manually, the algorithm automatically recalculates the group calls.

| Setting                    | Description                                                                                                                                                                                                                                                                                       |
|----------------------------|---------------------------------------------------------------------------------------------------------------------------------------------------------------------------------------------------------------------------------------------------------------------------------------------------|
| Normalization Method       | Settings for the normalization method. Two normalization methods are provided:                                                                                                                                                                                                                    |
|                            | <i>Proportional</i> Proportional normalization (default value)                                                                                                                                                                                                                                    |
|                            | <i>Linear</i> Linear normalization                                                                                                                                                                                                                                                                |
| Fluorescence Normalization | Temperature ranges where normalization is expected to be useful.<br>The automated algorithm provides default values for the ranges where normalization is assumed to be useful.                                                                                                                   |
|                            |  It is also possible to specify the temperature ranges using the vertical sliders in the 'Melting Curves' chart. For detailed information, see section <a href="#">Melting Curves</a> , on page 212.             |
|                            | <i>Pre-Melt Range from/to</i> Pre-melting temperature range.                                                                                                                                                                                                                                      |
|                            | <i>Post-melt Range from/to</i> Post-melting temperature range.                                                                                                                                                                                                                                    |
| Sensitivity                | Sensitivity settings for the automated algorithm.                                                                                                                                                                                                                                                 |
|                            | <i>Delta T<sub>m</sub> Discrimination</i> An increase of sensitivity subdivides the analyzed curves into more groups. Small T <sub>m</sub> differences are valued higher to separate curves into different groups.                                                                                |
|                            | <i>Curve Shape Discrimination</i> An increase of sensitivity subdivides the analyzed curves into more groups. Small differences in curve morphology (for example, small shoulders) are valued higher to separate curves into different groups.                                                    |
| Pos/Neg Threshold          | Minimum fluorescence value for a positive call.                                                                                                                                                                                                                                                   |
|                            |  It is also possible to specify the positive/negative threshold using the horizontal slider in the 'Melting Curves' chart. For detailed information, see section <a href="#">Melting Curves</a> , on page 212. |

The *Reset* button on the *Calculation* tab resets all settings to the default values.

B

## Positions tab

The *Positions* tab allows for removing or adding positions. Removing or adding a position triggers a recalculation of the analysis by the automated algorithm.

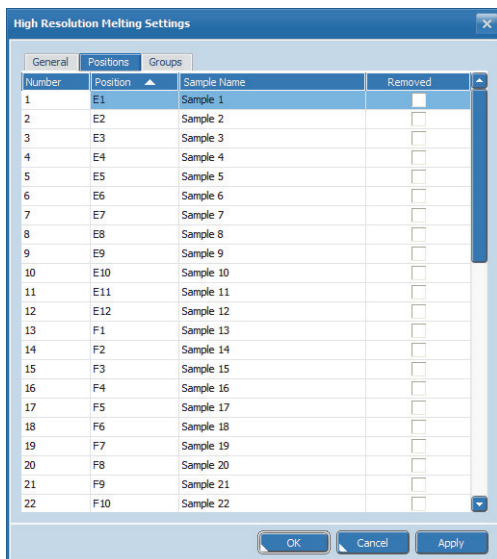

Figure 124: High Resolution Melting Settings dialog box, Positions tab

| Setting            | Description                                                                                                                                                                                                                                                                                                                                                                                                                                                                                                                                                                                                                                                                                                                                                                                                                                                                                             |
|--------------------|---------------------------------------------------------------------------------------------------------------------------------------------------------------------------------------------------------------------------------------------------------------------------------------------------------------------------------------------------------------------------------------------------------------------------------------------------------------------------------------------------------------------------------------------------------------------------------------------------------------------------------------------------------------------------------------------------------------------------------------------------------------------------------------------------------------------------------------------------------------------------------------------------------|
| <i>Number</i>      | Numbering of the position.                                                                                                                                                                                                                                                                                                                                                                                                                                                                                                                                                                                                                                                                                                                                                                                                                                                                              |
| <i>Position</i>    | Position of the well in the multiwell plate.                                                                                                                                                                                                                                                                                                                                                                                                                                                                                                                                                                                                                                                                                                                                                                                                                                                            |
| <i>Sample Name</i> | Name of the sample present in the position.                                                                                                                                                                                                                                                                                                                                                                                                                                                                                                                                                                                                                                                                                                                                                                                                                                                             |
| <i>Removed</i>     | <ul style="list-style-type: none"> <li>▶ Checking this field removes the position from the analysis. Removed positions are no longer displayed in tables and charts of the corresponding analysis.</li> <li>▶ Unchecking the field adds the position back to the analysis.</li> </ul> <p>Removing and adding positions back triggers a recalculation of the analysis by the automated algorithm.</p> <p> <i>It is possible to add or remove multiple positions simultaneously by multi-selecting and using either the 'Add Selected' or 'Remove Selected' command on the shortcut menu of the table.</i></p> <p><i>It is also possible to remove/add positions using the commands on the shortcut menu of the result table. For detailed information, see section <a href="#">Result Table</a>, on page 216.</i></p> |

## Groups tab

The *Groups* tab allows for renaming the groups the automated algorithm has calculated. The *Rename* button opens the *HRM Group* dialog box, where the operator can enter a new name for the group.

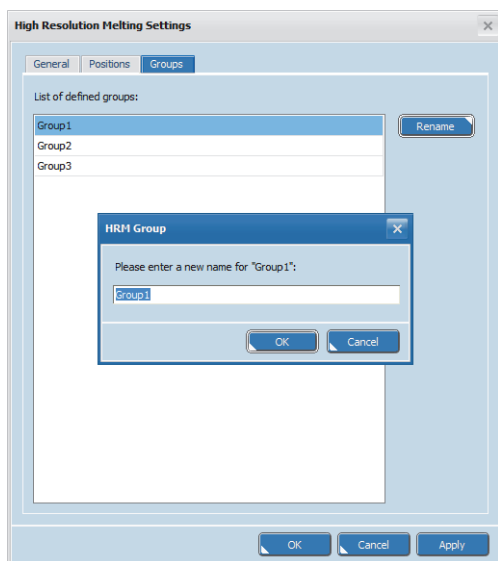

Figure 125: High Resolution Melting Settings dialog box, Groups tab

B

### 7.6.3 Melting Curves

Melting curves show the relevant target's dye intensity against temperature in °C. The chart shows the downward curve in fluorescence for the samples as they melt. For detailed information on selecting and deselecting curves, zooming, and using the graphs shortcut menu, see section [Working with graphs](#), on page 106.

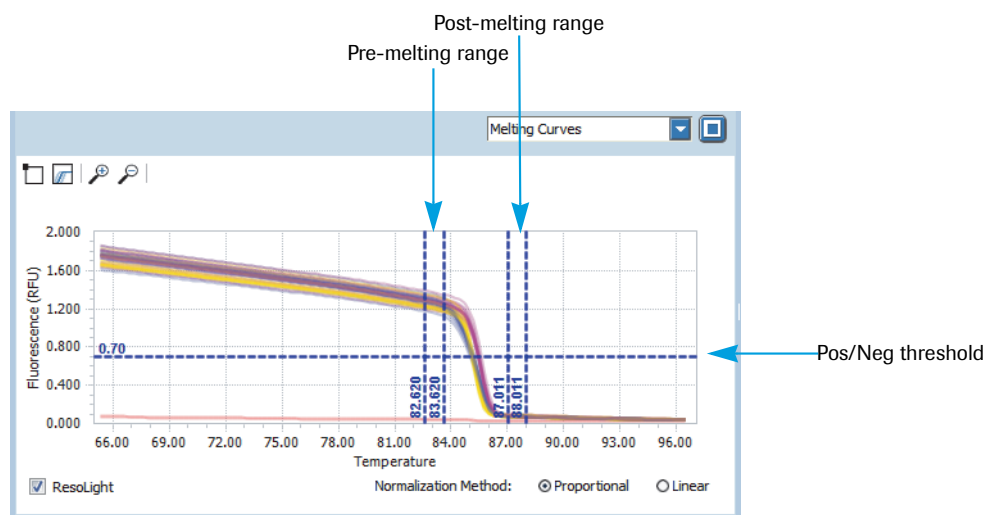

**Figure 126: High Resolution Melting, Melting Curves graph**

#### Normalization ranges and methods

The vertical sliders in the melting curves chart allow for manually changing the temperature ranges that specify the normalization areas. The two leftmost vertical sliders *Pre-Melting Range from* and *Pre-Melting Range to* specify the pre-melting temperature range, while the two rightmost vertical sliders *Post-Melting Range from* and *Post-Melting Range to* specify the post-melting temperature range.

By default, the automated algorithm locates the fluorescence normalization sliders. When the slider settings are manually changed, the algorithm automatically recalculates the group calls. The *Normalized Melting Curves* chart, the *Normalized Melting Peaks* chart, and the *Difference Plot* are displayed according to the defined ranges.

Normalization is performed using one of two methods:

► Proportional normalization (default value):

For each melting curve the mean fluorescence intensity of the pre-melting temperature range and the mean fluorescence intensity of the post-melting temperature range are calculated. Each curve is normalized by subtracting the offset (calculated mean intensity of the post-melting range) and then dividing by a constant value (calculated mean intensity of the pre-melting range minus offset). This way, the resulting normalized curve is scaled so that the initial intensity is "1" and the final intensity is "0".

► Linear normalization:

For each melting curve a linear regression of intensity against temperature is performed for the pre-melting temperature range and for the post-melting temperature range. Then, normalization is performed by subtracting the offset and linear scaling of each intensity value according to its temperature. The resulting normalized curve shows a horizontal bottom line (post-melting range) with an intensity of "0" and a horizontal top line (pre-melting range) with an intensity of "1".

For detailed information on how to specify the temperature ranges using the sliders, refer to the *LightCycler® 96 System User Training Guide*.

## Pos/Neg threshold

The horizontal slider in the melting curves chart specifies the minimum EPF threshold for a positive call.

By default, the automated algorithm provides an automatic positive/negative filter. When the setting of the Pos/Neg threshold slider is changed manually, the automated positive/negative call is overruled and the algorithm recalculates the group calls.

For detailed information on how to specify the positive/negative threshold using the slider, refer to the *LightCycler® 96 System User Training Guide*.

### 7.6.4 Normalized Melting Curves

Normalized melting curves show the normalized melting curve data according to the values specified in the melting curves chart. The pre-melt and post-melt signals of all samples are set to uniform values. Pre-melt signals are uniformly set to a relative value of 100%, while post-melt signals are set to a relative value of 0%.

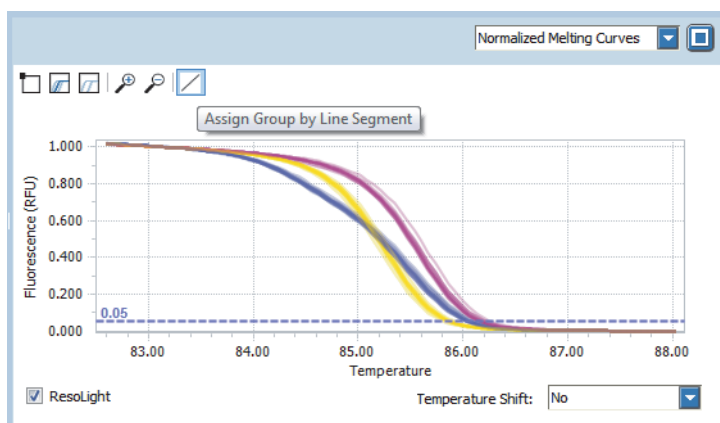

Figure 127: High Resolution Melting, Normalized Melting Curves graph

### Group assignment

The automated algorithm calculates groups based on the positive/negative threshold slider and the sensitivity settings. The *Assign Group by Line Segment* tool allows for manually overruling the algorithm group calls. For detailed information on how to assign a group by a line segment, refer to the *LightCycler® 96 System User Training Guide*.

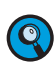

*When a recalculation of the analysis is triggered, for example, by changing the normalization ranges, a manual group assignment is automatically overruled by the group calculation of the automated algorithm.*

Selecting one or more curves using the *Assign Group by Line Segment* tool opens the *Group Assignment* dialog box, where the operator can assign the selected samples to another group.

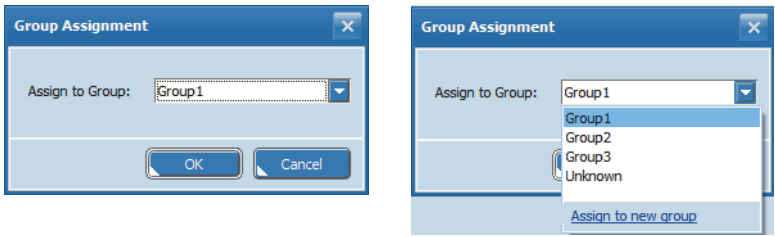

Figure 128: Group Assignment dialog box

| Setting         | Description                                                                                                    |
|-----------------|----------------------------------------------------------------------------------------------------------------|
| Assign to Group | Group the selected sample is to be assigned to; the list provides all group names specified in the experiment. |

Choosing *Assign to new group* in the list opens the *HRM Group* dialog box, which allows for creating a new group and assigning the selected samples to it.

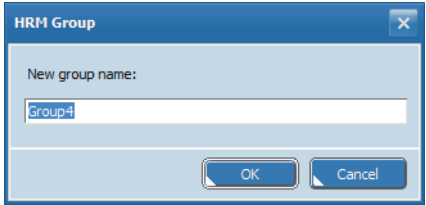

Figure 129: HRM Group dialog box

### Temperature shift

The horizontal slider in the normalized melting curves chart allows for applying a temperature shift to all data. This shift only changes the display of the curves; it does not change automated group calculation by algorithm or manual group assignment. The temperature shift normalizes all melting curves to the specified intensity threshold. For data with reasonable quality, this step is not recommended, as it normally disables the separation of homozygous mutants and wild types. Only when poor data quality is observed will the temperature shift improve the separation of heterozygous mutants (with different curve shape) from the group of wild types and homozygous mutants.

For detailed information on how to specify the temperature shift using the slider, refer to the *LightCycler® 96 System User Training Guide*.

### 7.6.5 Normalized Melting Peaks

A normalized melting peaks chart plots the first negative derivative of the normalized melting curves. In this chart, the melting temperature range of each sample appears as a peak after normalization and, optionally, temperature shift. Displaying the melting temperature ranges as peaks enables improved discrimination of complex groupings.

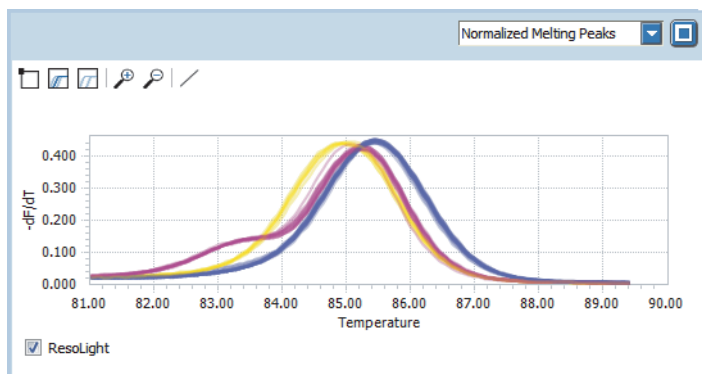

Figure 130: High Resolution Melting, Normalized Melting Peaks

For detailed information on manually assigning samples to groups, see section [Group assignment](#), on page 213.

### 7.6.6 Difference Plot

The difference plot chart displays each curve as it appears when subtracting the baseline curve, after normalization and, optionally, after temperature shift. The appearance of the curves in this chart depends on the selected baseline sample(s).

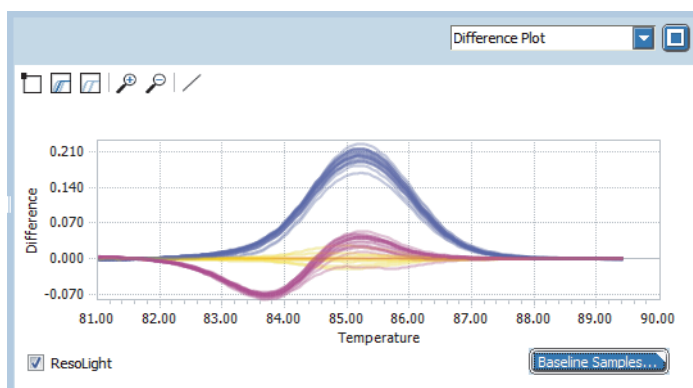

Figure 131: High Resolution Melting, Difference Plot

For detailed information on manually assigning samples to groups, see section [Group assignment](#), on page 213.

### Baseline Samples

The *Baseline Samples* button opens the *Baseline Samples* dialog box, where the operator can assign a baseline as a reference for the difference plot. When more than one baseline is selected, the curves of all selected baseline wells are averaged, and this average curve is used as the reference curve to be subtracted. The algorithm automatically uses the average curve of the group with the most members as the default baseline.

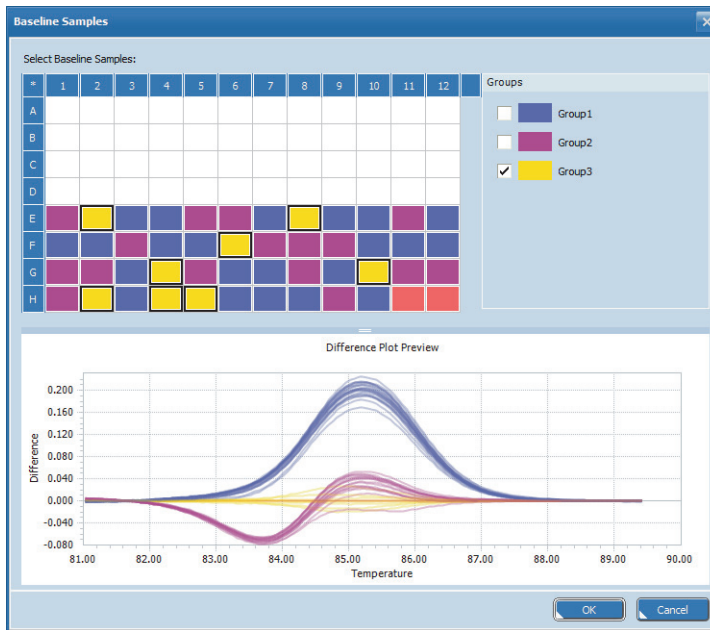

Figure 132: Baseline Samples dialog box

| Window area                    | Description                                                                                                                                                                                                                                                                         |
|--------------------------------|-------------------------------------------------------------------------------------------------------------------------------------------------------------------------------------------------------------------------------------------------------------------------------------|
| <i>Select Baseline Samples</i> | Multiwell plate image of the experiment displaying the calculated groups. <ul style="list-style-type: none"> <li>▶ The plate image allows for selecting one or more samples.</li> <li>▶ The <i>Groups</i> legend allows for selecting all samples of a calculated group.</li> </ul> |
| <i>Difference Plot Preview</i> | Preview of the difference plot according to the selection in the <i>Select Baseline Samples</i> window area. The preview is synchronized with the difference plot chart on the <i>Analysis</i> tab.                                                                                 |

### 7.6.7 Result Table

The result table displays the results of the high resolution melting analysis. For detailed information on editing cells and sorting and filtering the table, see section [Working with tables](#), on page 99.

| Result Table |       |            |             |           |        |           |       |             |
|--------------|-------|------------|-------------|-----------|--------|-----------|-------|-------------|
| #            | Color | Position ▲ | Sample Name | Gene Name | Group  | Dye ▲     | Notes | Sample Prep |
| 1            |       | E3         | Sample 3    | add1      | Group1 | ResoLight |       |             |
| 2            |       | E4         | Sample 4    | add1      | Group1 | ResoLight |       |             |
| 3            |       | E5         | Sample 5    | add1      | Group2 | ResoLight |       |             |
| 4            |       | E6         | Sample 6    | add1      | Group2 | ResoLight |       |             |
| 5            |       | E7         | Sample 7    | add1      | Group1 | ResoLight |       |             |
| 6            |       | E8         | Sample 8    | add1      | Group3 | ResoLight |       |             |
| 7            |       | E9         | Sample 9    | add1      | Group1 | ResoLight |       |             |
| 8            |       | E10        | Sample 10   | add1      | Group1 | ResoLight |       |             |
| 9            |       | E11        | Sample 11   | add1      | Group2 | ResoLight |       |             |
| 10           |       | E12        | Sample 12   | add1      | Group1 | ResoLight |       |             |
| 11           |       | F1         | Sample 13   | add1      | Group1 | ResoLight |       |             |
| 12           |       | F2         | Sample 14   | add1      | Group1 | ResoLight |       |             |
| 13           |       | F3         | Sample 15   | add1      | Group2 | ResoLight |       |             |

Figure 133: High Resolution Melting, Result Table

The columns of the table have the following meanings:

| Column            | Description                                                                                                                                                         |
|-------------------|---------------------------------------------------------------------------------------------------------------------------------------------------------------------|
| Color             | Color coding of the group the sample is assigned to. For detailed information on how to change the colors, see section <a href="#">Editing cells</a> , on page 102. |
| Position          | Position of the well in the multiwell plate. Each row is allocated a letter from A to H. The wells of a row are numbered from 1 to 12 from left to right.           |
| Sample Name       | Name of the sample present in the well.                                                                                                                             |
| Gene Name         | Name of the gene of interest.                                                                                                                                       |
| Group             | Name of the group the sample is assigned to.                                                                                                                        |
| Dye               | Name of the associated dye.                                                                                                                                         |
| Notes             | Description of the sample.                                                                                                                                          |
| Sample Prep Notes | Notes as specified in imported MagNA Pure 96 sample data files.                                                                                                     |
| Number            | Index number of a well. Index numbers are counted sequentially from left to right and from top to bottom.                                                           |

### 7.6.8 Heat Map

The heat map shows an image of the multiwell plate displaying the calculated groups and the assignment of the samples to the groups. For detailed information on displaying the sample properties and using the heat maps shortcut menu, see section [Working with heat maps](#), on page 109.

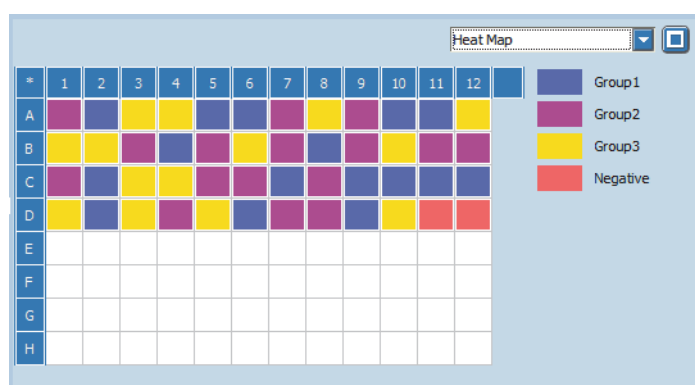

Figure 134: High Resolution Melting, Heat Map

### 7.6.9 Amplification Curves

The display of the amplification curves in high resolution melting analysis corresponds to their display in absolute quantification analysis. For detailed information, see section [Amplification Curves](#), on page 169.

## 7.7 Exporting analysis results

To store the results of an experiment or to transfer the results to other software programs, the operator must export the result files. The LightCycler® 96 Application Software supports result export for a successfully completed and calculated experiment. Exporting a file does not remove the data from the software, but copies the data and stores it in the specified location.

You can export the following data:

- ▶ Result graphs; see section [Graphs shortcut menu](#), on page 108.
- ▶ Result heat maps; see section [Heat map shortcut menu](#), on page 110.
- ▶ Result tables; see section [Exporting the result table](#), below.

Additionally, you can create a result file with result table data collected from multiple experiment files. For details, see section [Exporting multiple result data](#), below.

### 7.7.1 Exporting the result table

The exported data contain the currently displayed result table, including the header line and the experiment file name. The result table is exported to a tab-delimited text file (\*.txt).

- ▶ If a filter definition is used to reduce the number of displayed rows, only the filtered data are exported.
- ▶ Hidden columns are not exported to the result file.

#### To export the result table

- 1 Open the corresponding result table.
- 2 Modify the view of the table according to your needs.
- 3 Right-click the table and choose *Export to File* on the shortcut menu.  
The *Save As* dialog box opens.
- 4 Navigate to the corresponding location.  
 *By default, the default experiment directory is displayed. This directory can be specified in the 'Default Directory' dialog box. For detailed information, see section [Preferences](#), on page 134.*
- 5 Enter a name for the text file.
- 6 Choose *Save*.

### 7.7.2 Exporting multiple result data

The LightCycler® 96 Application Software provides a batch export tool that allows the operator to create a result file with result table data collected from multiple experiment files.

The batch export function exports the collected result table data to a tab-delimited text file (\*.txt). This file contains all result data, including the header rows, the experiment name and plate ID for each sample. You can open this file using Microsoft Excel.

For detailed information on the batch export function, see section [Result Batch Export](#), on page 131.

# **Chapter C**

## **LightCycler<sup>®</sup> 96 Instrument Software**

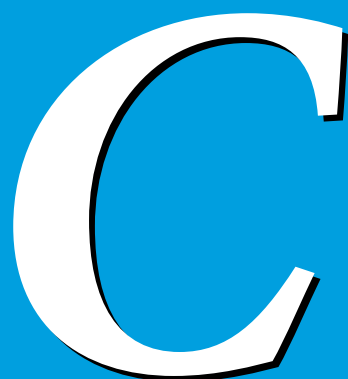

| <b>C</b> | <b>LightCycler® 96 Instrument Software</b> | <b>219</b> |
|----------|--------------------------------------------|------------|
| <b>1</b> | <b>Overview</b>                            | 221        |
| 1.1      | The main window                            | 222        |
| 1.1.1    | Status bar                                 | 223        |
| 1.1.2    | Working window area tabs                   | 224        |
| 1.1.3    | Global action bar                          | 224        |
| 1.1.4    | Alarms window area                         | 225        |
| 1.2      | General software conventions               | 227        |
| 1.2.1    | Buttons                                    | 227        |
| 1.2.2    | Input fields                               | 228        |
| 1.2.3    | Working with tables                        | 228        |
| 1.3      | Experiments                                | 229        |
| 1.3.1    | Experiment file types                      | 229        |
| 1.3.2    | Creating an experiment                     | 229        |
| 1.3.3    | Opening an experiment                      | 232        |
| 1.3.4    | Saving an experiment                       | 233        |
| 1.4      | Import, export, and file transfer options  | 234        |
| 1.4.1    | Import data                                | 234        |
| 1.4.2    | Export data                                | 235        |
| 1.5      | Exiting the software                       | 236        |
| <b>2</b> | <b>Overview tab</b>                        | 237        |
| 2.1      | Experiments table                          | 237        |
| 2.2      | Control bar                                | 240        |
| <b>3</b> | <b>Run Editor tab</b>                      | 242        |
| 3.1      | Measurement tab                            | 242        |
| 3.2      | Profile tab                                | 245        |
| 3.2.1    | Programs window area                       | 245        |
| 3.2.2    | Adding a new program                       | 246        |
| 3.2.3    | Steps window area                          | 247        |
| 3.3      | Temperature Profile window area            | 249        |
| <b>4</b> | <b>Raw Data tab</b>                        | 250        |
| 4.1      | Experiment progress bar                    | 250        |
| 4.2      | Graphs window area                         | 251        |
| <b>5</b> | <b>Utilities tab</b>                       | 253        |
| 5.1      | Instrument tab                             | 253        |
| 5.1.1    | Self test report                           | 254        |
| 5.1.2    | Current Date                               | 255        |
| 5.2      | Configuration tab                          | 256        |
| 5.2.1    | Device Name / Hostname                     | 257        |
| 5.2.2    | Network Information                        | 257        |
| 5.2.3    | Email Information                          | 259        |
| 5.2.4    | Remote Monitoring                          | 262        |
| 5.2.5    | Automated Backup                           | 263        |
| 5.3      | Service tab                                | 264        |
| 5.3.1    | Axeda client                               | 264        |
| 5.3.2    | Export Log Files                           | 266        |
| 5.3.3    | Backup and restore                         | 267        |
| 5.3.4    | Recalibrate Touch Screen                   | 269        |
| 5.3.5    | Lock Instrument for Transportation         | 271        |
| <b>6</b> | <b>Alarms and messages</b>                 | 272        |
| 6.1      | Alarm history                              | 273        |
| 6.2      | Detailed information                       | 275        |
| <b>7</b> | <b>Help browser</b>                        | 276        |

# LightCycler® 96 Instrument Software

## 1 Overview

The LightCycler® 96 Instrument Software provides all functions for using, configuring and controlling the LightCycler® 96 Instrument:

- ▶ Managing experiments; see section [Overview tab](#), on page 237.
- ▶ Specifying the temperature profile and the dye-specific parameters for an experiment run; see section [Run Editor tab](#), on page 242.
- ▶ Monitoring an experiment run; see section [Raw Data tab](#), on page 250.
- ▶ Configuring the instrument; see section [Utilities tab](#), on page 253.

After the experiment run, the raw data gathered by the software must be transferred to the application software for analysis. For a detailed description of the LightCycler® 96 Application Software, see chapter [LightCycler® 96 Application Software](#), on page 85.

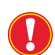

*The LightCycler® 96 Instrument Software is installed on the LightCycler® 96 Instrument which may be connected to a network. Please be aware that such a connection poses a potential risk to the integrity of the product, for example, through infection with malicious code (viruses, Trojan horses, etc.) or access by unauthorized third parties (such as intrusion by hackers). Roche therefore highly recommends protecting the product against such risks with appropriate security measures.*

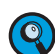

*For upgrading from LightCycler® 96 Instrument Software Version 1.0 to version 1.1, see section [Upgrading the LightCycler® 96 Instrument Software Version 1.0](#), on page 62. It is important to save and remove all version 1.0 experiment files from the instrument before upgrading to version 1.1. LightCycler® 96 Instrument Software Version 1.0 experiment files cannot be handled by version 1.1.*

## 1.1 The main window

The figure below shows the main window of the LightCycler® 96 Instrument Software (in this example, the *Run Editor* tab is shown). The main window contains the following areas, described below:

- ▶ Status bar; see section [Status bar](#), on page 223.
- ▶ Working window area with working window area tabs representing the main software functions; see section [Working window area tabs](#), on page 224.
- ▶ Global action bar; see section [Global action bar](#), on page 225.
- ▶ Alarms window area; see section [Global action bar](#), on page 225.

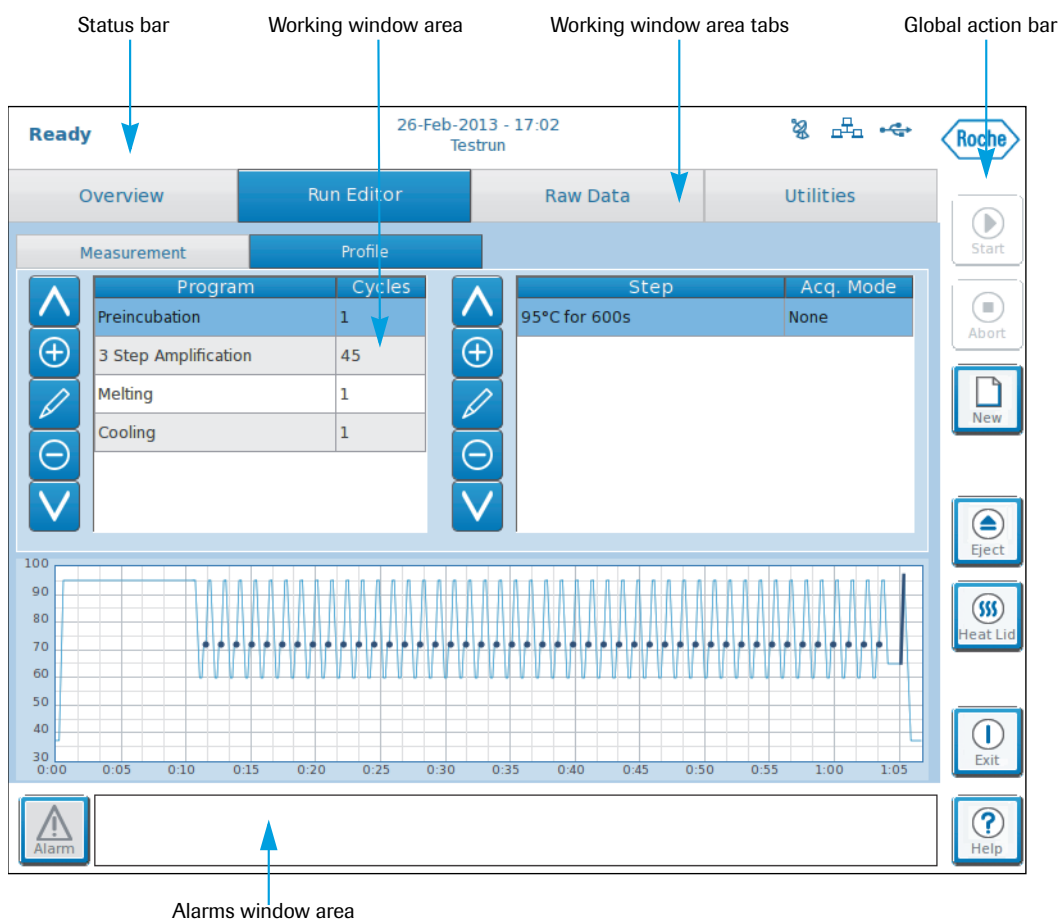

Figure 135: LightCycler® 96 Instrument Software main window

### 1.1.1 Status bar

The status bar displays the following information:

| Field/Icon                                                                          | Description                                                                                                                                                                                                                                                                                                                                                                                                                                                                                                                                                                                                                                                                                                                                                                                                                                                                                                                                                                                  |
|-------------------------------------------------------------------------------------|----------------------------------------------------------------------------------------------------------------------------------------------------------------------------------------------------------------------------------------------------------------------------------------------------------------------------------------------------------------------------------------------------------------------------------------------------------------------------------------------------------------------------------------------------------------------------------------------------------------------------------------------------------------------------------------------------------------------------------------------------------------------------------------------------------------------------------------------------------------------------------------------------------------------------------------------------------------------------------------------|
| <status>                                                                            | <p>Current instrument status:</p> <ul style="list-style-type: none"> <li>▶ <i>Initializing</i><br/>Initialization of the instrument hardware.</li> <li>▶ <i>Ready</i><br/>The block cycler cover has reached the target temperature and the instrument is ready to start a run.</li> <li>▶ <i>Running: &lt;experiment name&gt;</i><br/>The specified experiment is running.</li> <li>▶ <i>Standby</i><br/>The heater of the block cycler cover is switched off.</li> <li>▶ <i>Lid Reheating</i><br/>The block cycler cover is heating up after a standby.</li> <li>▶ <i>Aborting: &lt;experiment name&gt;</i><br/>The specified experiment run is being aborted.</li> <li>▶ <i>Error</i><br/>A hardware or software error has occurred and has left the instrument unable to function.</li> <li>▶ <i>Activating Transportation Lock</i><br/>The instrument is preparing the transportation lock.</li> <li>▶ <i>Transportation Lock</i><br/>The instrument is ready for transport.</li> </ul> |
|  | <p>Experiment scheduled.</p> <p>When a run is started in the <i>Initializing</i> or the <i>Standby</i> status, lid reheating is started automatically and the experiment is in <i>Scheduled</i> status. The <i>Initializing</i> or <i>Lid Reheating</i> statuses are then displayed with a clock symbol.</p>                                                                                                                                                                                                                                                                                                                                                                                                                                                                                                                                                                                                                                                                                 |
| <date - time><br><experiment name>                                                  | <p>Current date and time.</p> <p>Name of the currently selected experiment.</p>                                                                                                                                                                                                                                                                                                                                                                                                                                                                                                                                                                                                                                                                                                                                                                                                                                                                                                              |
|  | <p>An experiment is currently being saved, removed, synchronized, or otherwise remotely processed.</p> <p> <i>As long as this icon flashes, the instrument should not be switched off.</i></p>                                                                                                                                                                                                                                                                                                                                                                                                                                                                                                                                                                                                                                                                                                            |
|  | <p>The instrument is connected to an Ethernet network.</p>                                                                                                                                                                                                                                                                                                                                                                                                                                                                                                                                                                                                                                                                                                                                                                                                                                                                                                                                   |
|  | <p>The Ethernet network connection failed.</p>                                                                                                                                                                                                                                                                                                                                                                                                                                                                                                                                                                                                                                                                                                                                                                                                                                                                                                                                               |
|  | <p>The Ethernet network connection has limited connectivity, that is, the instrument recognizes the network, but is unable to establish the connection.</p>                                                                                                                                                                                                                                                                                                                                                                                                                                                                                                                                                                                                                                                                                                                                                                                                                                  |
|  | <p>A USB drive is connected to the instrument.</p>                                                                                                                                                                                                                                                                                                                                                                                                                                                                                                                                                                                                                                                                                                                                                                                                                                                                                                                                           |
|  | <p>Remote monitoring is activated.</p> <p>For detailed information, see section <a href="#">Remote Monitoring</a>, on page 262.</p>                                                                                                                                                                                                                                                                                                                                                                                                                                                                                                                                                                                                                                                                                                                                                                                                                                                          |
|  | <p>Automated backup of experiments to a network share is activated.</p> <p>For detailed information, see section <a href="#">Automated Backup to Network Share</a>, on page 263.</p>                                                                                                                                                                                                                                                                                                                                                                                                                                                                                                                                                                                                                                                                                                                                                                                                         |
|  | <p>The Axeda client is activated.</p> <p>For detailed information, see section <a href="#">Axeda Service Client</a>, on page 264.</p>                                                                                                                                                                                                                                                                                                                                                                                                                                                                                                                                                                                                                                                                                                                                                                                                                                                        |

### 1.1.2 Working window area tabs

The LightCycler® 96 Instrument Software provides the complete workflow via the tabs in the working window area:

| Tab               | Description                                                                                                                                                                                                                                                                                                  |
|-------------------|--------------------------------------------------------------------------------------------------------------------------------------------------------------------------------------------------------------------------------------------------------------------------------------------------------------|
| <i>Overview</i>   | Provides a list of the experiments available on the instrument and the USB drive (if connected). For detailed information, see section <a href="#">Overview tab</a> , on page 237.                                                                                                                           |
| <i>Run Editor</i> | Provides the following functions: <ul style="list-style-type: none"> <li>▶ Defining the measurement settings for the experiment.</li> <li>▶ Defining the temperature and cycling sequence for the experiment.</li> </ul> For detailed information, see section <a href="#">Run Editor tab</a> , on page 242. |
| <i>Raw Data</i>   | Provides the run progress, temperature profile, and raw fluorescence data collected during an experiment run. For detailed information, see section <a href="#">Raw Data tab</a> , on page 250.                                                                                                              |
| <i>Utilities</i>  | Provides utilities for managing the instrument, for example software update, log file export, or network configuration. For detailed information, see section <a href="#">Utilities tab</a> , on page 253.                                                                                                   |

On the lower levels, a bread crumb navigation below the working window area tabs shows how the current screen was selected:

|                                                 |            |          |           |
|-------------------------------------------------|------------|----------|-----------|
| Overview                                        | Run Editor | Raw Data | Utilities |
| Utilities > Configuration > Network Information |            |          |           |

**Figure 136: Working window area, bread crumb navigation**

### 1.1.3 Global action bar

The buttons in the global action bar provide access to general software functions. Their availability depends on the current status of the instrument. The buttons provide the following actions:

| Button                                                                              | Function | Description                                                                                                                                                                                                                                                                                                                                                                                                                                                                   |
|-------------------------------------------------------------------------------------|----------|-------------------------------------------------------------------------------------------------------------------------------------------------------------------------------------------------------------------------------------------------------------------------------------------------------------------------------------------------------------------------------------------------------------------------------------------------------------------------------|
|    | Start    | Only enabled in <i>Initializing</i> , <i>Ready</i> , and <i>Standby</i> status:<br>Starts the experiment selected on the <i>Overview</i> tab. Scheduled experiments are started when the instrument status <i>Ready</i> is achieved.<br>For detailed information, see section <a href="#">Overview tab</a> , on page 237.                                                                                                                                                     |
|    | Abort    | Only enabled while a run is being processed:<br>Aborts the currently executed or scheduled run.<br>You are prompted to confirm the abort.<br> <i>When a scheduled run is aborted, the new experiment status is not 'Aborted', but is still 'Unprocessed'.</i>                                                                                                                                |
|    | New      | Only enabled if less than 50 experiments are available on the instrument and a connected USB drive:<br>Opens the <i>Create New Experiment</i> window area.<br>For detailed information, see section <a href="#">Experiments</a> , on page 229.                                                                                                                                                                                                                                |
|   | Eject    | Pushes the loading module forward. The operator can open the loading module completely using the recessed grip. For detailed information, see section <a href="#">Loading module</a> , on page 30.<br> <i>The loading module may only be opened using the 'Eject' button and when the button is enabled. Otherwise the instrument changes to the 'Error' state and has to be rebooted.</i> |
|  | Heat Lid | Only enabled in <i>Standby</i> status:<br>Starts heating of the block cyler cover. After heating, the instrument changes to the <i>Ready</i> status.                                                                                                                                                                                                                                                                                                                          |
|  | Exit     | Not available while a run is being processed:<br>Opens the <i>Exit Options</i> window area for shutting down or rebooting the LightCycler® 96 Instrument Software.<br>For detailed information, see section <a href="#">Exiting the software</a> , on page 236.                                                                                                                                                                                                               |
|  | Help     | Opens the help browser of the LightCycler® 96 Instrument.<br>For detailed information, see section <a href="#">Help browser</a> , on page 276.                                                                                                                                                                                                                                                                                                                                |

### 1.1.4 Alarms window area

The alarms window area displays the unconfirmed error and warning messages.

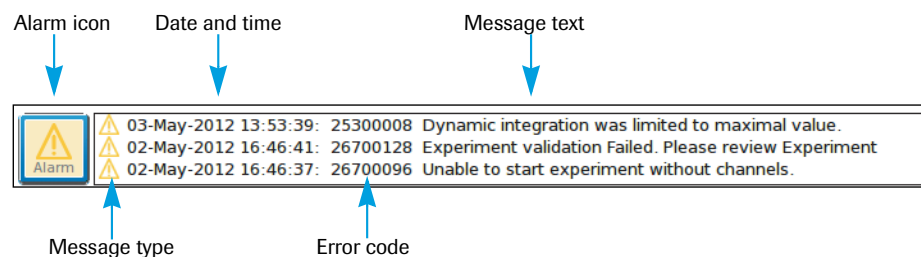

**Figure 137: Alarms window area**

The alarms window area contains the alarm icon on the left and the message field.

#### Alarm icon

The color of this icon changes depending on the severity of the alert. It reflects the highest level of any unconfirmed alarm displayed in the alarms window area.

| Icon | Function | Description                                                                                                                                              |
|------|----------|----------------------------------------------------------------------------------------------------------------------------------------------------------|
|      |          | There are no unconfirmed alarms.                                                                                                                         |
|      | Warning  | There are unconfirmed alarms at <i>Warning</i> level.<br>The system may continue working, but not with full performance, or may run into problems later. |
|      | Error    | There are unconfirmed alarms at <i>Error</i> level.<br>The system will stop performing some actions if the operator does not intervene.                  |

#### Message field

By default, the last three alarms are shown in the message field.

- ▶ Choosing the alarm icon displays the complete list of alarms; see section [Alarm history](#), on page 273.
- ▶ Choosing a single message displays the corresponding detailed information; see section [Detailed information](#), on page 275.

Each message contains the following information:

- ▶ The message type, specifying the alarm level: *Warning* or *Error*.
- ▶ The date and time when the error occurred.
- ▶ The error code of the message.
- ▶ The message text.

For detailed information on displaying message details, confirming messages, and deleting messages, see section [Alarms and messages](#), on page 272.

## 1.2 General software conventions

### 1.2.1 Buttons

The LightCycler® 96 Instrument Software uses the following standard buttons:

| Button                                                                              | Description                                                                                                                                                                                                                                                                                                         |
|-------------------------------------------------------------------------------------|---------------------------------------------------------------------------------------------------------------------------------------------------------------------------------------------------------------------------------------------------------------------------------------------------------------------|
|    | Closes the dialog box/window area and applies the settings to the corresponding parameters.                                                                                                                                                                                                                         |
|    | Closes the dialog box/window area and discards the settings.                                                                                                                                                                                                                                                        |
|    | Closes the window area.                                                                                                                                                                                                                                                                                             |
|    | Closes the displayed information dialog box.                                                                                                                                                                                                                                                                        |
|    | Changes to the previous/next possible value for the input field.                                                                                                                                                                                                                                                    |
|    | <ul style="list-style-type: none"> <li>▶ In an input field: Increases the selected value.</li> <li>▶ In a list or table: Changes to the previous entry.</li> <li>▶ On a text page: Scrolls up in the text.</li> <li>▶ On the <i>Profile</i> tab of the run editor: Moves the selected item up one place.</li> </ul> |
|  | <ul style="list-style-type: none"> <li>▶ In an input field: Decreases the selected value.</li> <li>▶ In a list or table: Changes to the next entry.</li> <li>▶ On a text page: Scrolls down in the text.</li> <li>▶ On the <i>Profile</i> tab of the run editor: Moves the selected item down one place.</li> </ul> |
|  | Pencil button, update button, and tools button:<br>Each button opens a dialog box/window area which allows for specifying the corresponding additional values.                                                                                                                                                      |

### 1.2.2 Input fields

The LightCycler® 96 Instrument Software provides several options for entering data into input fields:

| Input Field                           | Description                                                                          |
|---------------------------------------|--------------------------------------------------------------------------------------|
| Text field                            | Choose the field itself to open the corresponding dialog box for changing the value. |
| Text field with left and right arrows | Specify the corresponding previous or next value using the left and right arrows.    |

### 1.2.3 Working with tables

The LightCycler® 96 Instrument Software provides functions to be used in all tables displayed in the user interface. This section describes functions that are shared between the different tables.

#### To select and deselect items

---

- 1 Choose a row in a table to select the corresponding item. The selected item is highlighted.  
Choosing another row deselects the previous row.
- 

#### To sort tables

---

- 1 Choose the header of a column to sort the table by the column values.  
Choosing the header several times toggles the sort order between descending and ascending.
- 

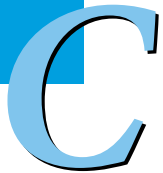

## 1.3 Experiments

The information provided in the experiment definition controls the LightCycler® 96 Instrument during an experiment run. The experiment definition specifies the target temperatures and hold times of the thermal block cycler, the number of cycles being executed, and other parameters. As the experiment progresses, the software gathers fluorescence data from the instrument and displays it on the *Raw Data* tab.

For starting an experiment run, the experiment must be available on the instrument or on the connected USB drive in a sub folder *experiments*. Operators can specify an experiment definition as follows:

- ▶ On the instrument using the LightCycler® 96 Instrument Software.
- ▶ On a computer using the LightCycler® 96 Application Software. In this case, the experiment must be transferred to the instrument for the run. For detailed information on the application software, see chapter *LightCycler® 96 Application Software*, on page 85.

After the experiment run, the raw data gathered by the software on the instrument must be transferred back to the application software for analysis. For detailed information on how to send an experiment to the instrument or retrieve it to the computer, see section *Instrument Manager*, on page 124.

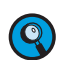

*During an experiment run, it is not recommended to use a USB drive, for example, for exporting or importing data, or for synchronizing an experiment, as this may cause problems in the measurement process.*

### 1.3.1 Experiment file types

The LightCycler® 96 Instrument Software supports the following experiment file types:

- ▶ \*.lc96p (LightCycler® 96 experiment files for processed experiments).
- ▶ \*.lc96u (LightCycler® 96 experiment files for unprocessed experiments).

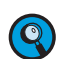

*Experiment files generated with LightCycler® 96 Software Version 1.0 (\*.lc96) cannot be opened with version 1.1. Operators must open these files in the LightCycler® 96 Application Software on the computer, save them as '\*.lc96p' or '\*.lc96u' files, and transfer the new files back to the instrument.*

By default, all newly generated experiment files have the file type \*.lc96u. Aborted experiments are treated identically to processed experiments, that is, they are saved as \*.lc96p files.

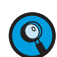

*It is not possible to generate analyses on aborted experiments in the LightCycler® 96 Application Software.*

### 1.3.2 Creating an experiment

Before a LightCycler® 96 Instrument run can be started, a new experiment has to be created. The operator has the following options for creating a new experiment:

- ▶ Generating a completely new experiment.
- ▶ Generating a new experiment by using an existing experiment as a template.
- ▶ Generating a new experiment by using a predefined Roche template.

Experiments are created in the *Create New Experiment* window area. You access the window area using the *New* button in the global action bar.

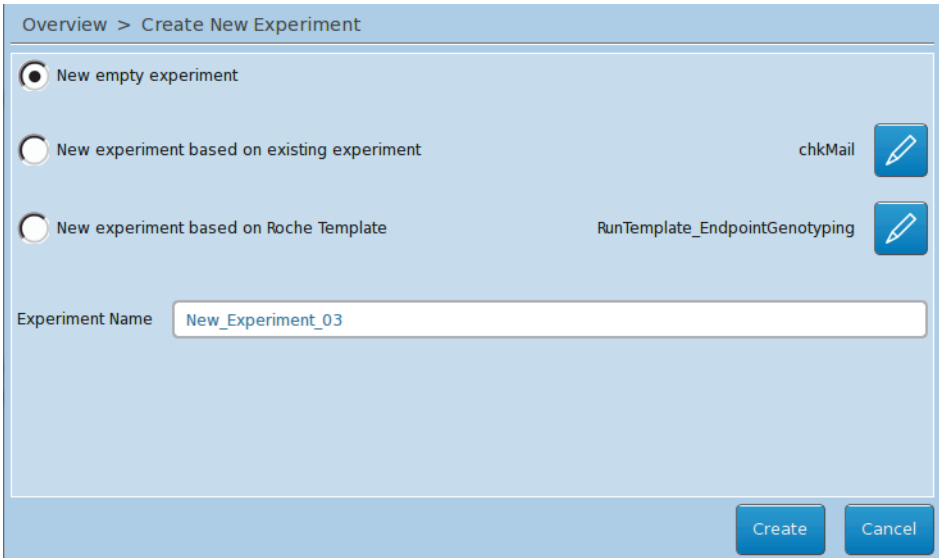

Figure 138: Create New Experiment window area

| Option                                             | Description                                                                                                     |
|----------------------------------------------------|-----------------------------------------------------------------------------------------------------------------|
| <i>New empty experiment</i>                        | Creates a new, empty experiment.                                                                                |
| <i>New experiment based on existing experiment</i> | Opens the specified experiment as a template.                                                                   |
| <i>New experiment based on Roche template</i>      | Opens the specified Roche template.                                                                             |
| <i>Experiment Name</i>                             | Experiment file name. Choosing the text field opens the keyboard dialog box for specifying the name; see below. |

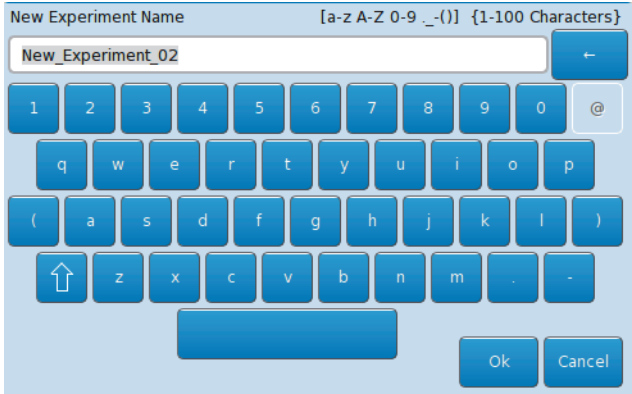

Figure 139: Keyboard dialog box

## To generate a new experiment

- 1 In the global action bar, choose *New*. The *Create New Experiment* window area opens.
- 2 Choose the *New empty experiment* option to create a new, empty experiment. The default name for the new experiment is provided in the *Experiment Name* window area as *New\_Experiment\_<no>*.
- 3 Choose the *Experiment Name* field. The keyboard dialog box opens.
- 4 Specify the name for the new experiment and close the dialog box with *Ok*.
- 5 Choose *Create*.  
The LightCycler® 96 Instrument Software
  - ▶ Adds the new experiment to the list on the *Overview* tab.
  - ▶ Opens the *Measurement* tab in the *Run Editor* for the new experiment.

## To use an existing experiment as a template

To create a new experiment from an existing one (that is, to copy all settings of an experiment), the operator must open the experiment file as a template. In this case, the raw data of the experiment is deleted. The experiment run settings and the sample editor settings of the experiment are provided for editing.

- 1 In the global action bar, choose *New*. The *Create New Experiment* window area opens.
- 2 Choose the *Existing experiment* option.
- 3 Choose the pencil button next to the option. The experiment list opens showing the experiment files available on the instrument.
- 4 Choose the experiment and close the list with *Ok*. The default name for the new experiment is provided in the *Experiment Name* field as *<existing\_experiment>\_<no>*.
- 5 Choose the *Experiment Name* field. The keyboard dialog box opens.
- 6 Specify the name for the new experiment and close the dialog box with *Ok*.
- 7 Choose *Create*.  
The LightCycler® 96 Instrument Software
  - ▶ Adds the new experiment to the list on the *Overview* tab.
  - ▶ Opens the *Measurement* tab in the *Run Editor* for the new experiment.
- 8 Change all settings according to your needs.  
 *When detection format settings are changed (for example, the dye type in the same channel), all gene-specific settings (that is, gene name and concentration) are set to their default values.*

## To use a Roche template

Roche provides a number of predefined experiments as templates. An experiment template contains the temperature profile and the dye-specific parameters for an experiment.

- 1 In the global action bar, choose *New*. The *Create New Experiment* window area opens.
- 2 Choose the *Roche template* option.
- 3 Choose the pencil button next to the option. The template list opens showing the Roche templates available on the instrument.
- 4 Choose the template and close the list with *Ok*. The default name for the new experiment is provided in the *Experiment Name* field as *<template>\_<no>*.
- 5 Choose the *Experiment Name* field. The keyboard dialog box opens.
- 6 Specify the name for the new experiment and close the dialog box with *Ok*.
- 7 Choose *Create*.  
The LightCycler® 96 Instrument Software
  - ▶ Adds the new experiment to the list on the *Overview* tab.
  - ▶ Opens the *Measurement* tab in the *Run Editor* for the new experiment.
- 8 Change all settings according to your needs.

### 1.3.3 Opening an experiment

Experiments can be opened at any time before, during, or after the experiment run and during execution of another experiment.

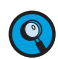

*The LightCycler® 96 Instrument Software allows for opening and editing an experiment while another experiment is running.*

## To open an experiment

- 1 On the *Overview* tab, select the experiment to be opened.
  - ▶ This experiment is then available on the *Run Editor* tab.
  - ▶ The experiment is executed when you choose the *Start* button in the global action bar.
  - ▶ If the experiment is running or completed, the temperature profile and the collected raw data are displayed on the *Experiment* tab.

### 1.3.4 Saving an experiment

The LightCycler® 96 Instrument Software automatically saves all changes in an experiment file. The experiment file is saved according to its original location:

- ▶ On the LightCycler® 96 Instrument.
- ▶ On the USB drive.
- ▶ On both media, if the operator has synchronized the storage locations.  
For detailed information on synchronizing, see section [Control bar](#), on page 240.

The experiment file is saved according to the processing status:

- ▶ As a LightCycler® 96 file for an unprocessed experiment (\*.lc96u).
- ▶ As a LightCycler® 96 file for a processed, aborted or failed experiment (\*.lc96p).

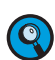

*For safety reasons, operators should regularly download the experiment data from the instrument using one of the following functions.*

- ▶ *On the LightCycler® 96 Instrument: Synchronizing the storage locations; see section [Control bar](#), on page 240.*
- ▶ *In the LightCycler® 96 Application Software: Retrieving the experiment from the instrument; see section [Instrument Manager](#), on page 124.*



## 1.4 Import, export, and file transfer options

The following figure shows the input and output data flows of the instrument software. The data to be imported and exported is described below.

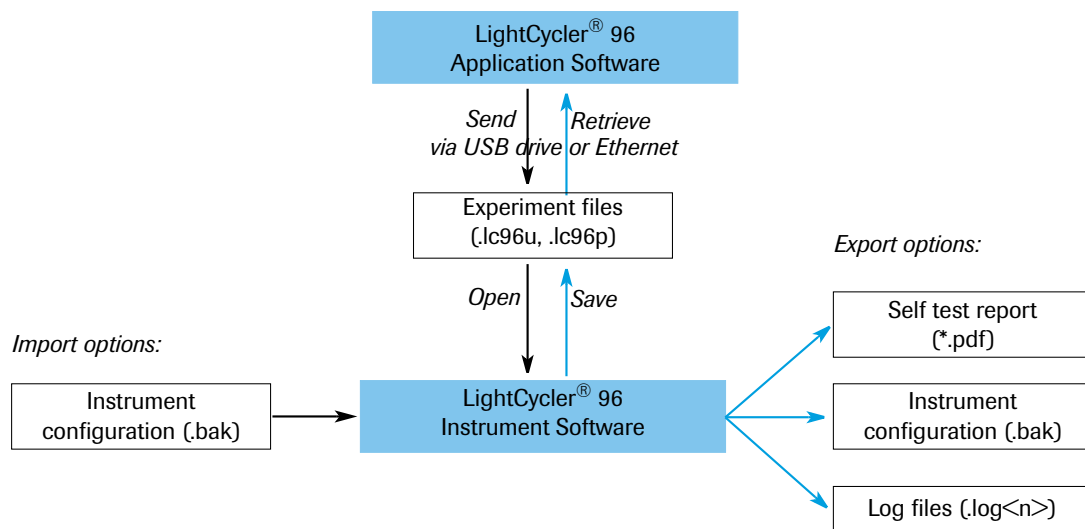

**Figure 140: LightCycler® 96 Instrument Software input and output data flow**

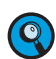

*Experiment files generated with LightCycler® 96 Software Version 1.0 (\*.lc96) cannot be opened with version 1.1. Operators must open these files in the LightCycler® 96 Application Software on the computer, save them as '\*.lc96p' or '\*.lc96u' files, and transfer the new files back to the instrument.*

### 1.4.1 Import data

To restore the configuration of the LightCycler® 96 Instrument, the following data can be imported into the LightCycler® 96 Instrument Software:

| Data                     | File Format | Description                                                                                                                                                                               |
|--------------------------|-------------|-------------------------------------------------------------------------------------------------------------------------------------------------------------------------------------------|
| Instrument configuration | .bak        | Configuration settings and experiment files, saved during a system backup of the instrument.<br>For detailed information, see section <a href="#">Backup/Restore/Reset</a> , on page 267. |

### 1.4.2 Export data

To store the self test report, the configuration or the log files of the instrument, or to transfer the data for further analysis, the corresponding files must be exported. The LightCycler® 96 Instrument Software provides export functions for the following data:

| Data                     | File Format | Description                                                                                                                                                                                                   |
|--------------------------|-------------|---------------------------------------------------------------------------------------------------------------------------------------------------------------------------------------------------------------|
| Self test report         | .pdf        | Results of the last self test of the instrument saved to a connected USB drive.<br>For detailed information, see section <a href="#">Self Test Report</a> , on page 254.                                      |
| Instrument configuration | .bak        | Configuration settings and experiment files, packed and saved as a backup file (*.bak) on a connected USB drive.<br>For detailed information, see section <a href="#">Backup/Restore/Reset</a> , on page 267. |
| Log files                | .log        | Log files containing the instrument log files.<br>For detailed information, see section <a href="#">Export Service Log Files to USB Drive</a> , on page 266.                                                  |

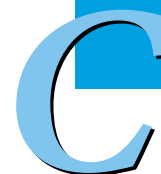

### 1.5 Exiting the software

The *Exit* button in the global action bar opens the *Exit Options* window area which provides options for shutting down and for rebooting the LightCycler® 96 Instrument Software.

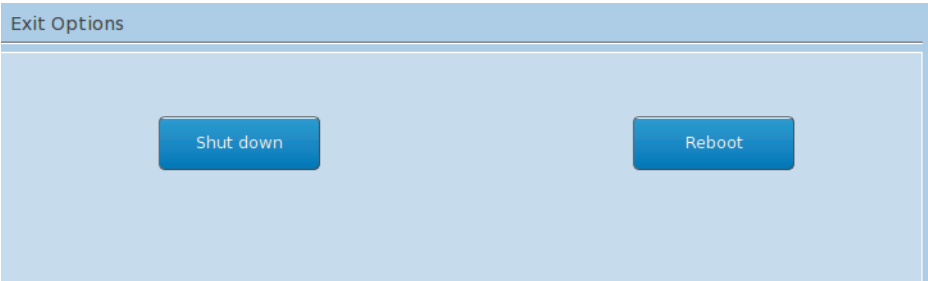

Figure 141: Exit Options window area

| Button    | Description                                                                                                                                                                                                                                                                                                   |
|-----------|---------------------------------------------------------------------------------------------------------------------------------------------------------------------------------------------------------------------------------------------------------------------------------------------------------------|
| Shut down | Shuts down the LightCycler® 96 Instrument Software.<br> After shutting down the instrument software, the operator must switch off the LightCycler® 96 Instrument using the mains power switch on the back of the instrument. |
| Reboot    | Shuts down and reboots the LightCycler® 96 Instrument Software.                                                                                                                                                                                                                                               |

 Always shut down the instrument using the 'Exit' button. Hard power-off can lead to data loss.

## 2 Overview tab

The *Overview* tab provides a list of the experiments available on the instrument and the USB drive (if connected), the status of each experiment, and the memory usage on the instrument.

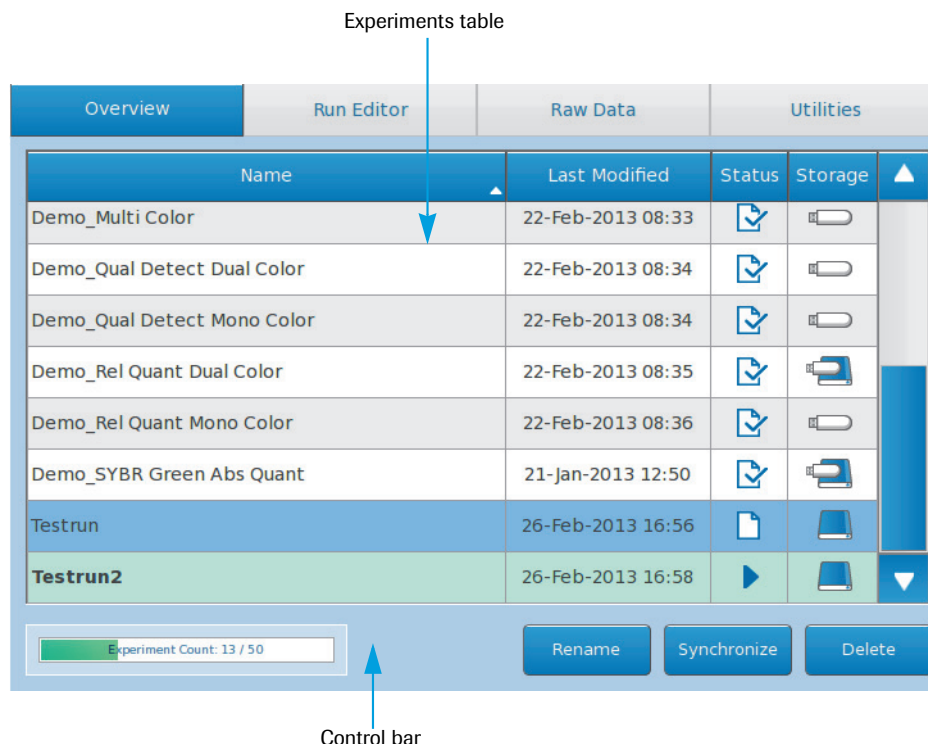

Figure 142: Overview tab

### 2.1 Experiments table

The experiments table shows all experiments available on the instrument and on a connected USB drive:

- ▶ If an experiment is currently running, it is displayed with a bold font and a light green background. A running experiment cannot be renamed or deleted. Synchronization is possible, but not recommended. For detailed information, see section [Control bar](#), on page 240.
- ▶ The currently selected experiment is displayed with a blue background. The selected experiment does not need to be the currently running experiment. For detailed information, see section [Selecting an experiment](#), on page 239.

Each experiment has the following properties:

| Column               | Description                                                                                                                         |
|----------------------|-------------------------------------------------------------------------------------------------------------------------------------|
| <i>Name</i>          | Name of the experiment file.                                                                                                        |
| <i>Last Modified</i> | Date and time of the last modification.                                                                                             |
| <i>Status</i>        | Status of the experiment. For detailed information on the various states, see section <a href="#">Status</a> , on page 238.         |
| <i>Storage</i>       | Location of the experiment file. For detailed information on the location icons, see section <a href="#">Storage</a> , on page 238. |

## Status

The software displays the following states for an experiment:

| Icon                                                                              | Status      | Description                                                                                                                                                                                                                                                                                                                                                                                                                          |
|-----------------------------------------------------------------------------------|-------------|--------------------------------------------------------------------------------------------------------------------------------------------------------------------------------------------------------------------------------------------------------------------------------------------------------------------------------------------------------------------------------------------------------------------------------------|
|  | Unprocessed | Non-executed experiment.                                                                                                                                                                                                                                                                                                                                                                                                             |
|  | Scheduled   | The experiment was started in <i>Standby</i> or <i>Initializing</i> instrument status. The experiment is started when the instrument status <i>Ready</i> is achieved.<br> <i>Opening the loading unit of the instrument aborts the scheduled experiment. If a scheduled experiment is aborted, the experiment status is reset to 'Unprocessed'.</i> |
|  | Running     | Currently running experiment.                                                                                                                                                                                                                                                                                                                                                                                                        |
|  | Processed   | Successfully executed experiment.                                                                                                                                                                                                                                                                                                                                                                                                    |
|  | Aborted     | Aborted or failed experiment (error during run).                                                                                                                                                                                                                                                                                                                                                                                     |

## Storage

The *Storage* column shows where the experiment file is located:

| Icon                                                                                | Storage      | Description                                                                                                                                         |
|-------------------------------------------------------------------------------------|--------------|-----------------------------------------------------------------------------------------------------------------------------------------------------|
|  | Instrument   | The experiment is stored on the instrument.                                                                                                         |
|  | USB          | The experiment is stored on the connected USB drive.                                                                                                |
|  | Synchronized | The experiment is synchronized, that is, stored on both locations. For detailed information, see section <a href="#">Control bar</a> , on page 240. |

The software provides the *Resolve Experiment Conflicts* dialog box, if the status of an experiment is different on the connected USB drive and the instrument:

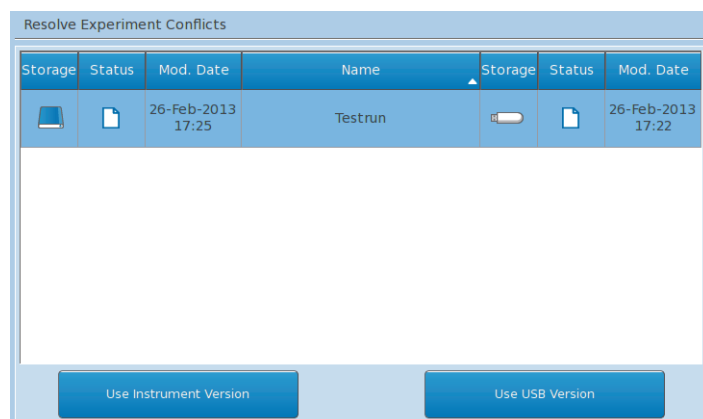

**Figure 143: Resolve Experiment Conflicts dialog box**

The dialog box provides the following information for both locations:

| Parameter        | Description                                                                                                                 |
|------------------|-----------------------------------------------------------------------------------------------------------------------------|
| <i>Name</i>      | Experiment name.                                                                                                            |
| <i>Storage</i>   | Storage location; for detailed information on the icons, see section <a href="#">Storage</a> above.                         |
| <i>Status</i>    | Status of the experiment on the corresponding location; for detailed information, see section <a href="#">Status</a> above. |
| <i>Mod. Date</i> | Date of the last modification on the corresponding location.                                                                |

The buttons provide the following functions:

| Button                        | Description                                                                                                                                 |
|-------------------------------|---------------------------------------------------------------------------------------------------------------------------------------------|
| <i>Use Instrument Version</i> | Overwrites the experiment file on the USB drive with the experiment file version on the instrument.                                         |
| <i>Use USB Version</i>        | Overwrites the experiment file on the instrument with the experiment file version on the USB drive. You are prompted to confirm the action. |

### Selecting an experiment

Selecting an experiment in the list opens the experiment file:

- ▶ This experiment is then available on the *Run Editor* tab.
- ▶ The experiment is executed when you choose the *Start* button in the global action bar.
- ▶ If the experiment is running or completed, the temperature profile and the collected raw data are displayed on the *Raw Data* tab. If the experiment is not running, the profile is displayed but is empty.

## 2.2 Control bar

The control bar on the *Overview* tab provides the following functions:

### Experiment Count bar

The *Experiment Count* bar shows the total sum of experiments saved on the instrument and on a currently connected USB drive.

 The *LightCycler® 96 Instrument* memory provides space for a maximum of 50 experiments. If while connecting a USB drive, the total number of 50 experiments is exceeded, a warning is displayed.

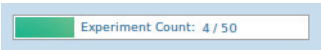

Figure 144: Overview tab, Experiment Count bar

### Buttons

The buttons on the *Overview* tab perform the following functions:

| Button             | Description                                                                                                                                                                                    |
|--------------------|------------------------------------------------------------------------------------------------------------------------------------------------------------------------------------------------|
| <i>Rename</i>      | Opens the <i>Rename Experiment</i> window area to specify a new name for the selected experiment. For detailed information, see section <a href="#">Rename Experiment window area</a> , below. |
| <i>Synchronize</i> | Synchronizes the storage locations:<br>If the selected experiment is located on the instrument, it is transferred to the USB drive and vice versa.                                             |
| <i>Delete</i>      | Deletes the selected experiment. The operator is prompted to select the location of the experiment to be deleted.                                                                              |

### Rename Experiment window area

The *Rename* button in the control bar opens the *Rename Experiment* window area for specifying a name for the selected experiment:

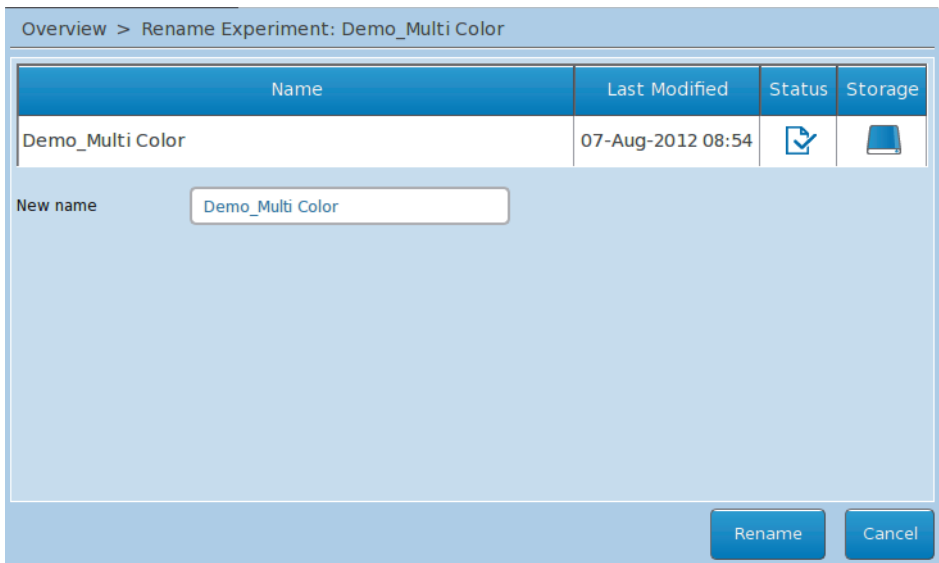

Figure 145: Rename Experiment window area

The window area provides the following options:

| Parameter | Description                                                                                                                                                                                                                           |
|-----------|---------------------------------------------------------------------------------------------------------------------------------------------------------------------------------------------------------------------------------------|
| Table     | Properties of the experiment as displayed on the <i>Overview</i> tab. For detailed information, see section <a href="#">Experiments table</a> , on page 237.                                                                          |
| New Name  | Input field for the new experiment name. Choosing the text field opens the keyboard dialog box for specifying the name.<br>Length: 1 to 100 characters<br>Allowed characters: a-z, A-Z, 0-9, _ (underscore), - (hyphen), . (dot), ( ) |

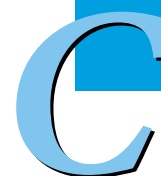

### 3 Run Editor tab

On the *Run Editor* tab, the dye-specific parameters for an experiment run and the temperature profile are specified (in this example, the *Measurement* tab is shown).

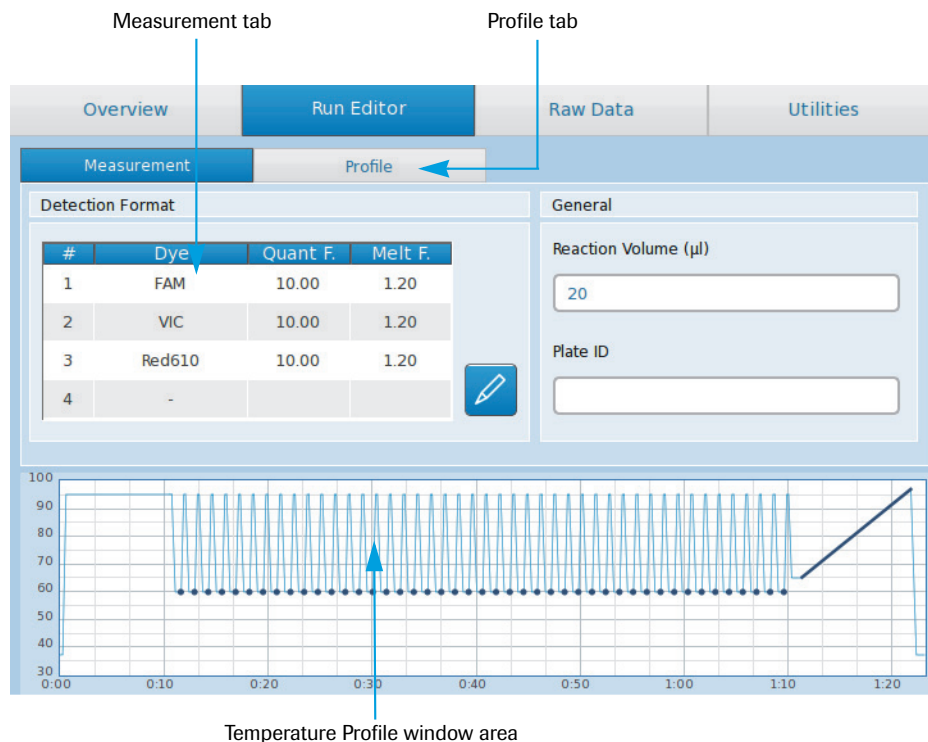

**Figure 146: Run Editor, Measurement tab**

For a new experiment, this tab shows no data. For detailed information on how to create a temperature profile and set the dye-specific parameters, refer to the *LightCycler® 96 System User Training Guide*.

#### 3.1 Measurement tab

The *Measurement* tab displays the dye-specific settings for an experiment run. The operator specifies the settings in the *Detection Format* window area. For detailed information, see section [Detection format](#), on page 243.

| Setting                 | Parameter             | Description                                                                                                                                                                                                                                                                                 |
|-------------------------|-----------------------|---------------------------------------------------------------------------------------------------------------------------------------------------------------------------------------------------------------------------------------------------------------------------------------------|
| <i>Detection Format</i> | <i>Dye</i>            | Name of the dye.                                                                                                                                                                                                                                                                            |
|                         | <i>Quant F.</i>       | Only available if the integration time mode is set to <i>Dynamic</i> : Multiplication factor to be applied to the filter combination for a quantification program. The <i>Quant Factor</i> represents the fold signal stroke from the initial background fluorescence to the plateau phase. |
|                         | <i>Melt F.</i>        | Only available if the integration time mode is set to <i>Dynamic</i> : Multiplication factor to be applied to the filter combination for a melting program.                                                                                                                                 |
|                         | <i>Integration T.</i> | Only available if the integration time mode is set to <i>Manual</i> : Acquisition time of the CCD camera.                                                                                                                                                                                   |

| Setting | Parameter            | Description                                                                                                                                                                                                                                                                                                                                                                                                                 |
|---------|----------------------|-----------------------------------------------------------------------------------------------------------------------------------------------------------------------------------------------------------------------------------------------------------------------------------------------------------------------------------------------------------------------------------------------------------------------------|
| General | Reaction Volume [μl] | Reaction volume to be used in the experiment.<br>The LightCycler® 96 Instrument supports reaction volumes from 10 to 50 μl.<br> <i>As the LightCycler® 96 Instrument does not validate the sample volume, the operator must ensure that the specified sample volume matches the volume pipetted into the wells of the multiwell plate.</i> |
|         | Plate ID             | Plate ID; saved to the experiment file for identification of the experiment.<br>When using the external handheld barcode scanner, the <i>Plate Id</i> field displays the barcode of the loaded multiwell plate. Alternatively, operators can edit the plate ID manually.                                                                                                                                                    |

## Detection format

For an unprocessed experiment the software provides a pencil button next to the *Detection Format* list which allows for specifying the dye-specific settings:

| Detection Format |        |          |         |
|------------------|--------|----------|---------|
| #                | Dye    | Quant F. | Melt F. |
| 1                | FAM    | 10.00    | 1.20    |
| 2                | VIC    | 10.00    | 1.20    |
| 3                | Red610 | 10.00    | 1.20    |
| 4                | -      |          |         |

Figure 147: Measurement tab, detection format list

The pencil button opens the *Detection Format* window area. By setting the detection formats, the operator chooses the filter combinations suitable for the experiment. A detection format specifies one or more excitation-emission filter combinations. For detailed information, see section [Detection channels](#), on page 38.

Run Editor > Detection Format: New\_Experiment\_01

| Channel                  |              |              |             |                      |
|--------------------------|--------------|--------------|-------------|----------------------|
|                          | 470/514      | 533/572      | 577/620     | 645/697              |
| Selected                 | Dye          | Quant Factor | Melt Factor | Integration Time [s] |
| <input type="checkbox"/> | SYBR Green I | 20.00        | 1.20        | 1.00                 |
| <input type="checkbox"/> | ResoLight    | 20.00        | 1.20        | 1.00                 |
| <input type="checkbox"/> | FAM          | 10.00        | 1.20        | 1.00                 |

Integration Time [s]

☒ Dynamic ☐ Manual

Back

Figure 148: Detection Format window area

The window area provides a tab for each channel. Each tab shows the following settings:

| Column                      | Description                                                                                                                                                                                                                                                                                                                                                                                                           | Possible values |
|-----------------------------|-----------------------------------------------------------------------------------------------------------------------------------------------------------------------------------------------------------------------------------------------------------------------------------------------------------------------------------------------------------------------------------------------------------------------|-----------------|
| <i>Selected</i>             | Specifies whether the channel is to be used by selecting the corresponding dye.<br> Only one dye can be selected per channel. The software automatically deselects a checkbox when you try to select more than one dye in the same channel group. SYBR Green I and ResoLight Dye cannot be combined with any dye of another channel. |                 |
| <i>Dye</i>                  | Name of the dye.                                                                                                                                                                                                                                                                                                                                                                                                      |                 |
| <i>Quant Factor</i>         | Only available if the integration time mode is set to <i>Dynamic</i> :<br>Multiplication factor to be applied to the filter combination for a quantification program. The <i>Quant Factor</i> represents the fold signal stroke from the initial background fluorescence to the plateau phase.                                                                                                                        | 1.0 to 500      |
| <i>Melt Factor</i>          | Only available if the integration time mode is set to <i>Dynamic</i> :<br>Multiplication factor to be applied to the filter combination for a melting program.                                                                                                                                                                                                                                                        | 1.0 to 500      |
| <i>Integration Time [s]</i> | Only available if the integration time mode is set to <i>Manual</i> :<br>Acquisition time of the CCD camera.                                                                                                                                                                                                                                                                                                          | 0.01 to 4 sec   |

Depending on the integration time mode chosen for the detection format, the window area enables the following settings:

| Mode           | Description                                                                                  | Setting          |
|----------------|----------------------------------------------------------------------------------------------|------------------|
| <i>Dynamic</i> | The integration time is set automatically based on the fluorescence of the individual plate. | Melt Factor      |
|                |                                                                                              | Quant Factor     |
| <i>Manual</i>  | The integration time is set manually.                                                        | Integration Time |

## 3.2 Profile tab

All temperature profiles are comprised of programs, which are run by the instrument in the order they are displayed on the *Profile* tab. Each program can be specified separately.

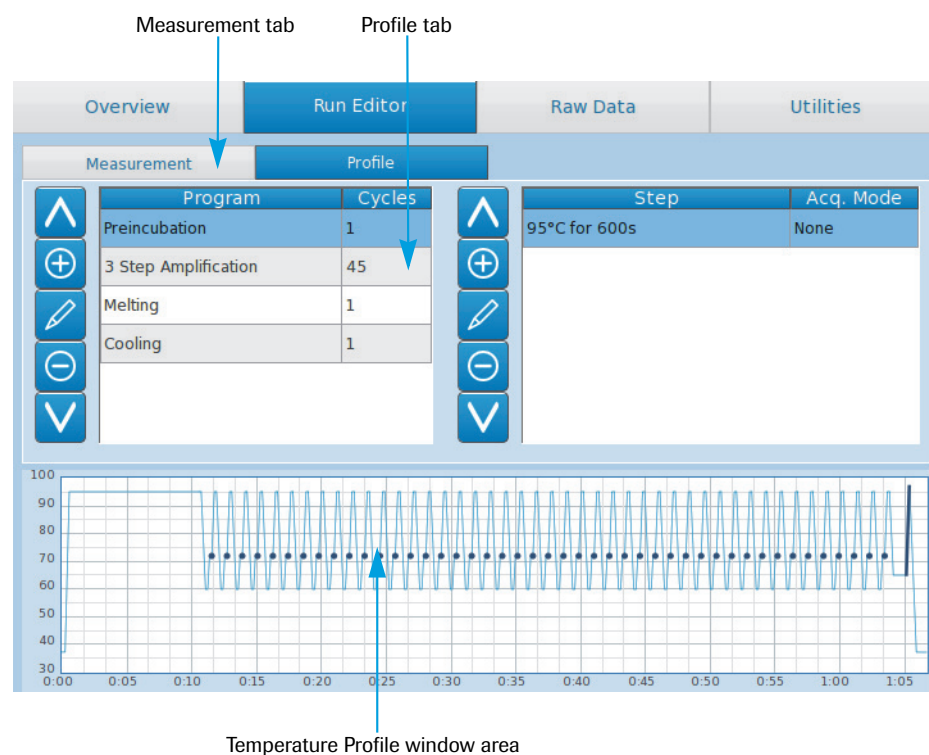

Figure 149: Run Editor, Profile tab

### 3.2.1 Programs window area

The programs are displayed in a list and have the following properties. The LightCycler® 96 Instrument Software derives these properties from the settings in the *Edit Program Settings* window area. For detailed information, see section [Program settings](#), on page 247.

| Parameter      | Description                                                                                                                                                                                                                                                                                                                                                                                                                          |
|----------------|--------------------------------------------------------------------------------------------------------------------------------------------------------------------------------------------------------------------------------------------------------------------------------------------------------------------------------------------------------------------------------------------------------------------------------------|
| <i>Program</i> | Name of the program.                                                                                                                                                                                                                                                                                                                                                                                                                 |
| <i>Cycles</i>  | Specifies how many times the cycle is to be repeated, for example, 1 or 45 times.<br> <i>If, in an amplification program, the 'Cycles' are set to '1', the acquisition mode for the corresponding step changes to 'None' and the 'Mode' option is disabled. For detailed information, see section <a href="#">Step settings</a>, on page 248.</i> |

## Program list buttons

The program list can be edited with the following buttons:

| Button                                                                            | Function | Description                                                                                                                                                                           |
|-----------------------------------------------------------------------------------|----------|---------------------------------------------------------------------------------------------------------------------------------------------------------------------------------------|
|  | Up       | Moves the selected program up one place.                                                                                                                                              |
|  | Add      | Opens a detailed program list which allows for adding a new program to the list. The new program is added to the end of the list.                                                     |
|  | Edit     | Displays the <i>Program Settings</i> window area which allows for editing the selected program. For detailed information, see section <a href="#">Program settings</a> , on page 247. |
|  | Remove   | Deletes the selected program from the list. If no program is selected, this button is disabled.                                                                                       |
|  | Down     | Moves the selected program down one place..                                                                                                                                           |

### 3.2.2 Adding a new program

The  button in the program list opens a detailed list, which allows for selecting a new program and adding it to the programs list.

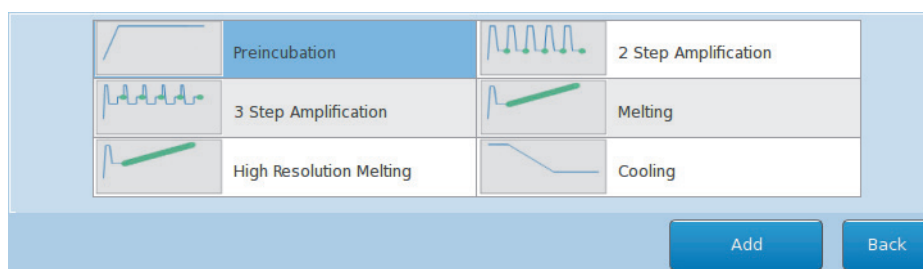

Figure 150: Predefined programs window area

The following programs are available:

| Program                                | Description                                                                                                                                                                                                                                                                                                                                                                                                                                                                                                                                                                                        |
|----------------------------------------|----------------------------------------------------------------------------------------------------------------------------------------------------------------------------------------------------------------------------------------------------------------------------------------------------------------------------------------------------------------------------------------------------------------------------------------------------------------------------------------------------------------------------------------------------------------------------------------------------|
| <i>Preincubation</i>                   | Holds a specified temperature for a defined time.                                                                                                                                                                                                                                                                                                                                                                                                                                                                                                                                                  |
| <i>2 Step/3 Step Amplification</i>     | Cycling program; defines a program of the experiment where the instrument will repeatedly heat and cool to a defined series of temperatures. Each repeat is called a cycle.<br><br>The touchdown function for amplification programs allows the operator to specify that one of the stages of each cycle will have its target temperature modified as the cycling proceeds. This allows for the early cycles of a PCR to have a higher annealing temperature specified, leading to more specific amplification. For detailed information, see section <a href="#">Step settings</a> , on page 248. |
| <i>Melting/High Resolution Melting</i> | Defines a program where the instrument will ramp to an initial temperature, then ramp to a final temperature. While ramping to the final temperature, optical acquisitions will be made continuously. These can then be analyzed to yield melting peaks.                                                                                                                                                                                                                                                                                                                                           |
| <i>Cooling</i>                         | Defines a program where the instrument will cool down to a final temperature and then hold the specified temperature for a defined time.                                                                                                                                                                                                                                                                                                                                                                                                                                                           |

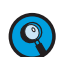

*It is not necessary to add a separate cooling program at the end of the run. At the end of each run, the samples are automatically cooled to +37°C.*

## Program settings

The pencil button in the program list opens the *Program Settings* window area on the *Profile* tab, which displays the program settings for the selected program and allows for editing a program as long as no run has been performed. Every change is displayed immediately in the *Temperature Profile* window area.

Figure 151: Program Settings window area

The *Program Settings* window area provides the following settings for each program:

| Parameter     | Description                                                                       |
|---------------|-----------------------------------------------------------------------------------|
| <i>Name</i>   | Name of the program.                                                              |
| <i>Cycles</i> | Specifies how many times the cycle is to be repeated, for example, 1 or 45 times. |

### 3.2.3 Steps window area

A program consists of one or more steps, which are run by the instrument in the order they are displayed in the *Steps* window area. A step specifies the following data:

- ▶ The target temperatures used by the instrument.
- ▶ The length of time for which the target temperature is held.
- ▶ The heating and cooling rates for reaching the target temperature.
- ▶ The acquisition mode to define how optical data is acquired.

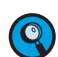

*The minimum experiment definition has one program with one cycle and one valid step.*

The LightCycler® 96 Instrument adjusts the temperature between the steps automatically, cooling or heating up to meet the temperature specified for the next step.

The steps are displayed in a list and have the following properties. The LightCycler® 96 Instrument Software derives these properties from the settings in the *Step Settings* window area (see section [Step settings](#), on page 248).

| Parameter        | Description                                                                         |
|------------------|-------------------------------------------------------------------------------------|
| <i>Step</i>      | Target temperature and duration in seconds for which the temperature is to be held. |
| <i>Acq. Mode</i> | Acquisition mode: <i>None</i> , <i>Single</i> , or <i>Continuous</i> .              |

## Step list buttons

The step list can be edited using the buttons to the left of the list:

| Button                                                                            | Function | Description                                                                                                                                                                     |
|-----------------------------------------------------------------------------------|----------|---------------------------------------------------------------------------------------------------------------------------------------------------------------------------------|
|  | Up       | Moves the selected step up one place.                                                                                                                                           |
|  | Add      | Adds a new step to the list. The new step is added to the end of the list.                                                                                                      |
|  | Edit     | Displays the <i>Step Settings</i> window area which allows for editing the selected program. For detailed information, see section <a href="#">Step settings</a> , on page 248. |
|  | Remove   | Deletes the selected step from the list. If no step is selected, this button is disabled.                                                                                       |
|  | Down     | Moves the selected step down one place.                                                                                                                                         |

## Step settings

The pencil button in the step list opens the *Step Setting* window area on the *Profile* tab, which displays the step settings for the selected step and allows for editing the steps as long as no run has been performed. Every change is immediately saved and displayed in the *Temperature Profile* window area.

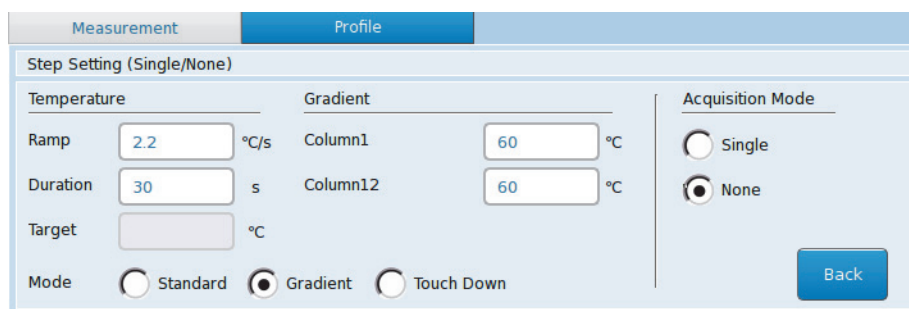

Figure 152: Run Editor, Step Setting window area with Gradient option

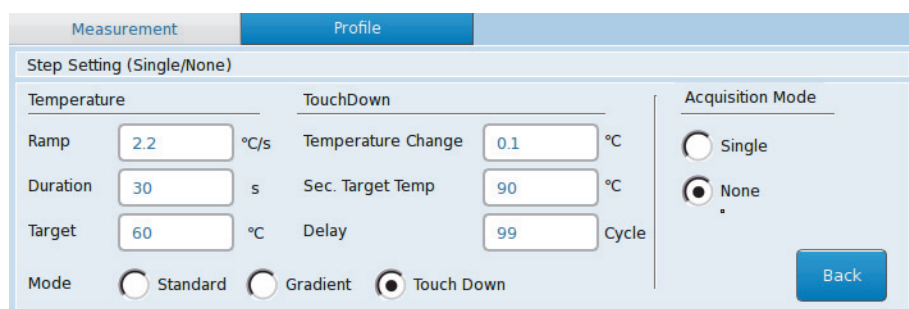

Figure 153: Run Editor, Step Setting window area with Touch Down option

The *Step Setting* window area provides the following settings for each step, depending on the selected program:

| Setting          | Parameter          | Description                                                                                                                                                                                                                                                                                                                                                                                                                                           |
|------------------|--------------------|-------------------------------------------------------------------------------------------------------------------------------------------------------------------------------------------------------------------------------------------------------------------------------------------------------------------------------------------------------------------------------------------------------------------------------------------------------|
| Temperature      | Ramp               | Rate of temperature change in °C per second, which the LightCycler® 96 Instrument uses for heating or cooling until the defined temperature is reached.                                                                                                                                                                                                                                                                                               |
|                  | Duration           | Duration in seconds for which the temperature is to be held.                                                                                                                                                                                                                                                                                                                                                                                          |
|                  | Target             | Temperature in °C, which is to be held for a defined time.                                                                                                                                                                                                                                                                                                                                                                                            |
| Gradient         |                    | Only available in <i>Gradient</i> mode:<br>Temperature grading used by the LightCycler® 96 Instrument for heating the different Peltier elements in the thermal block cycler. Operators can specify temperature gradients from 98°C to 37°C.                                                                                                                                                                                                          |
|                  | Column 1           | Minimum temperature for the gradient. This temperature is applied to the leftmost column of the multiwell plate.                                                                                                                                                                                                                                                                                                                                      |
|                  | Column 12          | Maximum temperature for the gradient. This temperature is applied to the rightmost column of the multiwell plate.                                                                                                                                                                                                                                                                                                                                     |
| Touchdown        |                    | Only available in <i>Touch Down</i> mode:<br>Enables/disables the touchdown function.                                                                                                                                                                                                                                                                                                                                                                 |
|                  | Temperature Change | Rate of temperature change in °C per cycle, at which the touchdown phase proceeds to the second target temperature.                                                                                                                                                                                                                                                                                                                                   |
|                  | Sec. Target Temp   | Second target temperature to be reached by the last cycle of the program. This temperature is used to change the target temperature of a segment during the amplification reaction.                                                                                                                                                                                                                                                                   |
|                  | Delay              | Number of cycles after which the temperature change is first applied.                                                                                                                                                                                                                                                                                                                                                                                 |
| Acquisition Mode | Single             | Only available for amplification programs:<br>Acquires fluorescence data once only, when the temperature target is reached and the hold time completed.                                                                                                                                                                                                                                                                                               |
|                  | Continuous         | Not available for amplification programs:<br>Acquires fluorescence data continuously until the temperature target is reached.                                                                                                                                                                                                                                                                                                                         |
|                  | None               | No fluorescence data are acquired.                                                                                                                                                                                                                                                                                                                                                                                                                    |
| Mode             |                    | Only available for amplification programs:<br>Enables/disables the <i>Standard</i> , <i>Gradient</i> or <i>Touch Down</i> option.<br> It is not possible to use gradient steps and touchdown steps in the same amplification program. Therefore, if 'Gradient' is selected in a step, 'Touch Down' is disabled for all other steps in this program and vice versa. |
| Back             |                    | Closes the <i>Step Setting</i> window area and displays the programs list and the steps list with the changed settings.                                                                                                                                                                                                                                                                                                                               |

### 3.3 Temperature Profile window area

The *Temperature Profile* window area provides a summary of the programs selected for the experiment and their temperature and time settings.

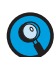

When starting an experiment run, the operator must ensure that the correct temperature profile is used.

## 4 Raw Data tab

The *Raw Data* tab shows the temperature profile and the raw fluorescence data collected during an experiment run in real time. The horizontal and the vertical scaling of the charts changes according to the running experiment. The raw data of an experiment contains all instrument corrections, but no color compensation, drift, or background correction (in this example, the temperature profile graph is shown).

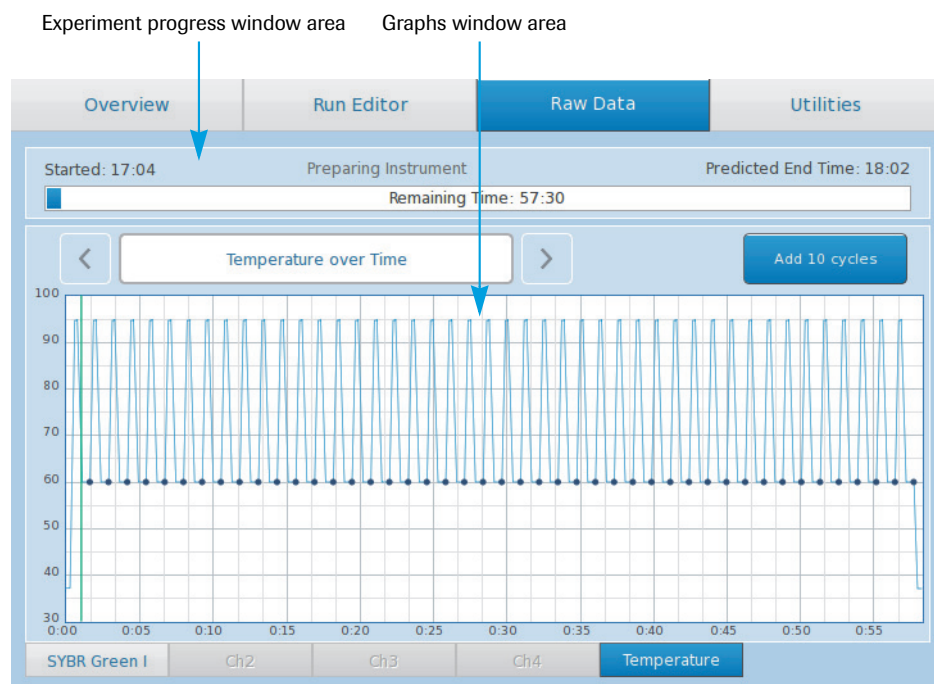

Figure 154: Raw Data tab

### 4.1 Experiment progress window area

The experiment progress window area provides the following information:

- ▶ The start time of the experiment.
- ▶ The end time of the experiment. During an experiment run, this field displays the predicted end time.
- ▶ During an experiment run, the progress bar displays the run progress and the predicted time the experiment run will take.

## 4.2 Graphs window area

### Toggle buttons for selecting the display

These buttons are only enabled when a <dye> tab is selected. The toggle buttons select how fluorescence raw data is displayed:

| Setting                       | Description                                                                                                                               |
|-------------------------------|-------------------------------------------------------------------------------------------------------------------------------------------|
| <i>Fluorescence over Time</i> | Displays the fluorescence curves, that is, the fluorescence intensity against the time in hours, minutes, and seconds for the entire run. |
| <i>Fluorescence Heat Map</i>  | For amplification programs only:<br>Displays a heat map for the selected dye.                                                             |

### Add 10 cycles

Choosing this button adds 10 cycles to a running experiment. The software adds 10 cycles to the currently running program.

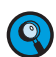

*'Add 10 cycles' can only be performed during an amplification program, and not in a melting program.*

Depending on the selected tab, the graphs window area displays the following information:

### <dye> tabs

Depending on the dyes selected in the *Detection Format* window area, different dye-specific tabs are available. The <dye> tabs provide fluorescence data either as fluorescence curves or as a heat map.

- If *Fluorescence over Time* is selected, the fluorescence curves are displayed, that is, the fluorescence intensity against the time in hours, minutes, and seconds for the entire run.

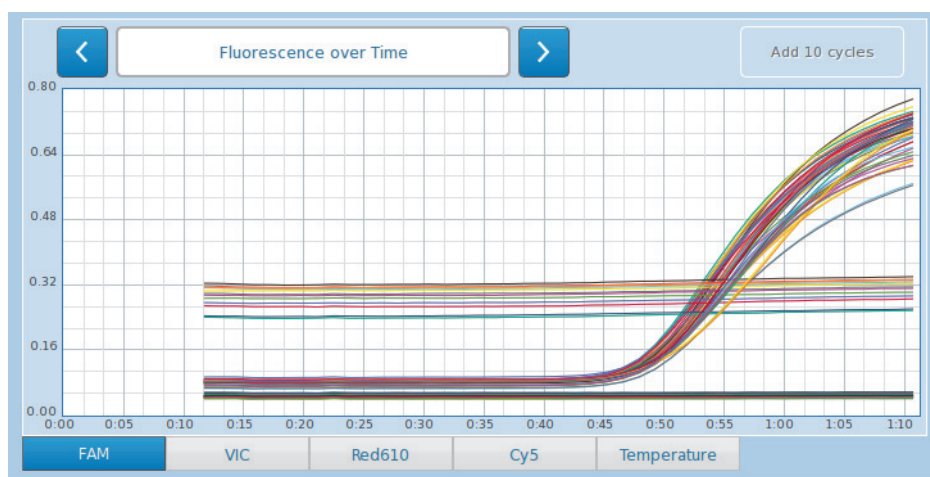

Figure 155: Raw Data tab, fluorescence curves

- If *Fluorescence Heat Map* is selected, a heat map is displayed for all measured dyes. This option is only available for amplification programs.

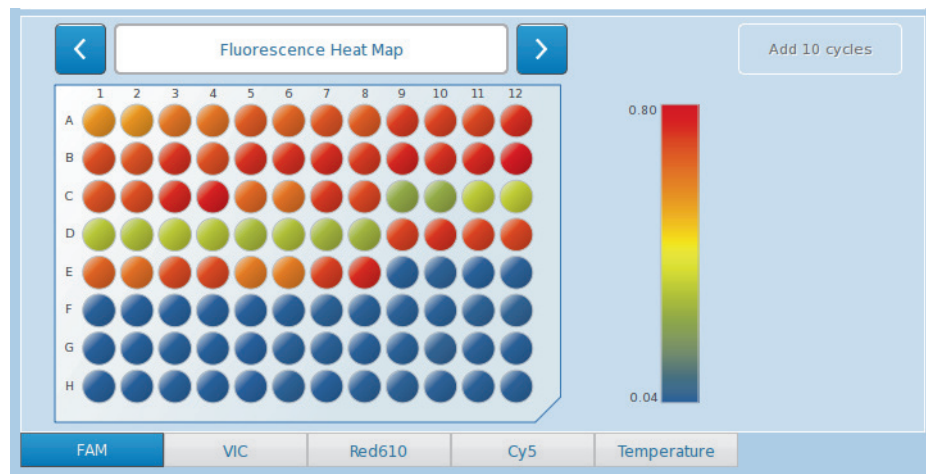

Figure 156: Raw Data tab, fluorescence heat map

## Temperature tab

The *Temperature* tab provides a summary of the programs selected for the experiment and their temperature and time settings.

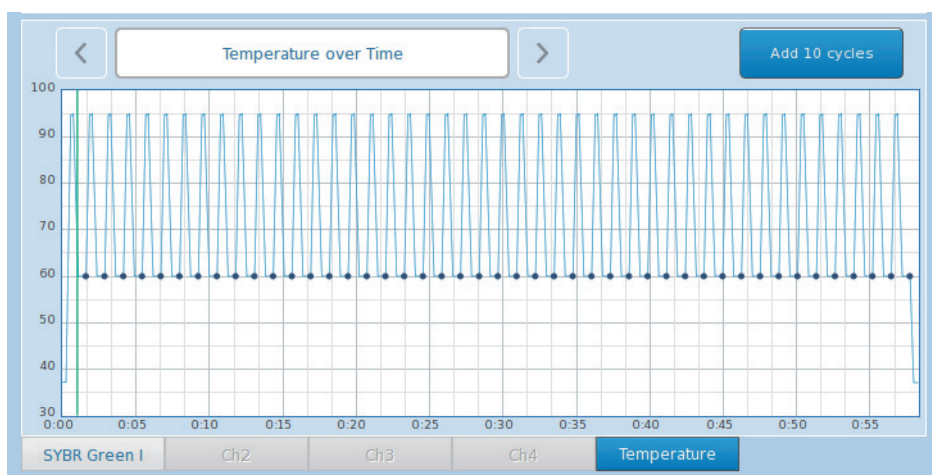

Figure 157: Raw Data tab, temperature profile

The green line in the temperature profile indicates the progress of the program.

## 5 Utilities tab

The *Utilities* tab provides functions for managing the instrument (in this example, the *Instrument* tab is shown).

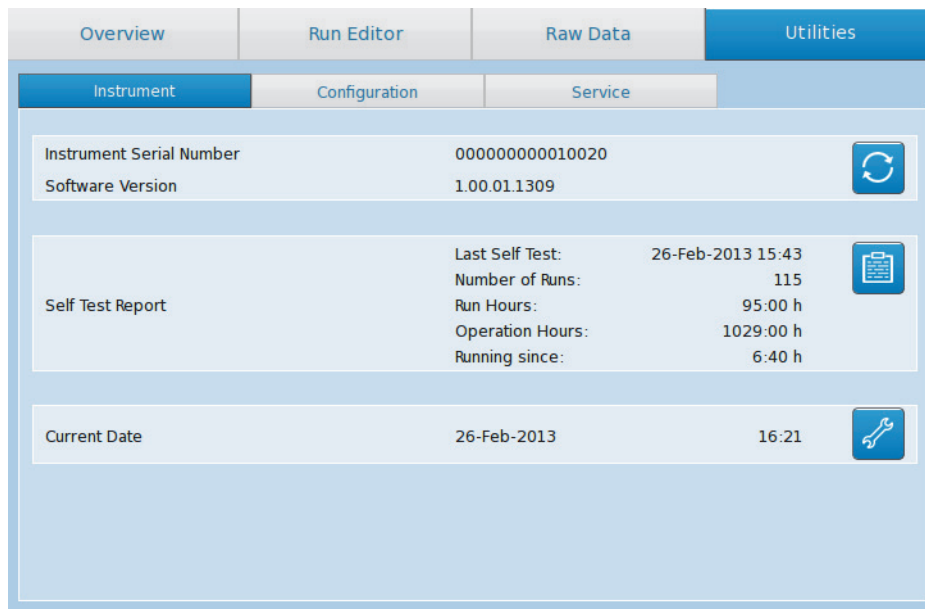

Figure 158: Utilities, Instrument tab

### 5.1 Instrument tab

The *Instrument* tab displays the following configuration settings for the LightCycler® 96 Instrument and provides the associated configuration functions. Each function is accessed via the button next to the corresponding field:

| Setting                         | Description                                                                                                                                                                                                                                                                                                                                             |
|---------------------------------|---------------------------------------------------------------------------------------------------------------------------------------------------------------------------------------------------------------------------------------------------------------------------------------------------------------------------------------------------------|
| <i>Instrument Serial Number</i> | Serial number of the instrument.                                                                                                                                                                                                                                                                                                                        |
| <i>Software Version</i>         | Version number of the currently installed LightCycler® 96 Instrument Software; the update button opens the <i>Software Update</i> window area, which allows for installing a software update from a connected USB drive.<br>For detailed information, see section <a href="#">Installing a LightCycler® 96 Instrument Software update</a> , on page 60. |
| <i>Self Test Report</i>         | Information on the last self test of the instrument; the button opens the <i>Self Test</i> window area, which displays detailed information.<br>For detailed information, see section <a href="#">Self Test Report</a> , on page 254.                                                                                                                   |
| <i>Current Date</i>             | Current date and time; the tools button opens the <i>Date/Time configuration</i> window area, which allows for setting the date and time.<br>For detailed information, see section <a href="#">Current Date</a> , on page 255.                                                                                                                          |

### 5.1.1 Self Test Report

The button next to the *Self Test Report* field opens the *Self Test* window area, which displays detailed information on the last self test of the instrument. The self test is performed during initialization of the instrument.

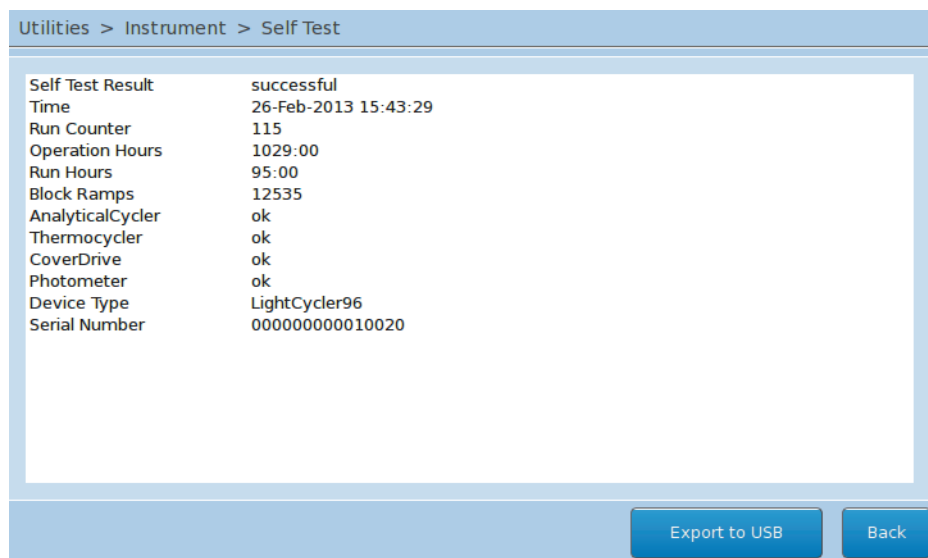

Figure 159: Self Test window area

### Export to USB

The *Export to USB* button allows for saving the last self test results to a connected USB drive. Results are saved to a PDF file with the default name *Selftest\_Result\_<series\_no>\_<date>.pdf*.

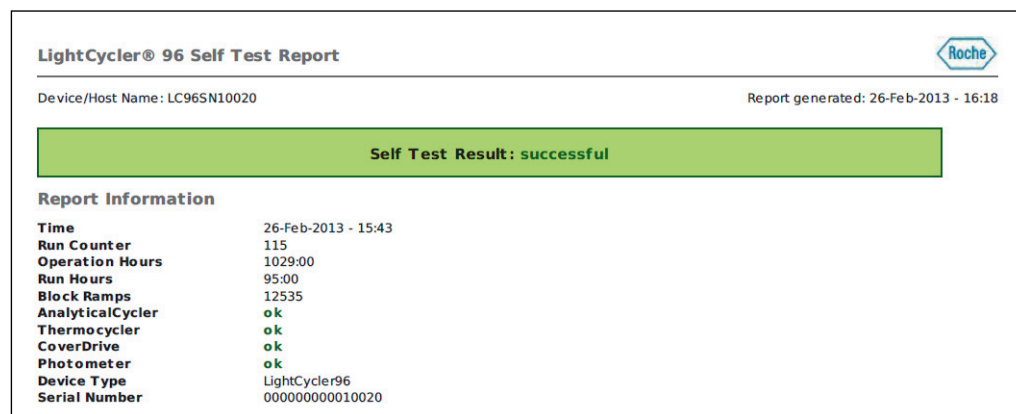

Figure 160: Self Test Report PDF file

### 5.1.2 Current Date

The tools button next to the *Current Date* field opens the *Date/Time Configuration* window area, which allows for setting the current date and time.

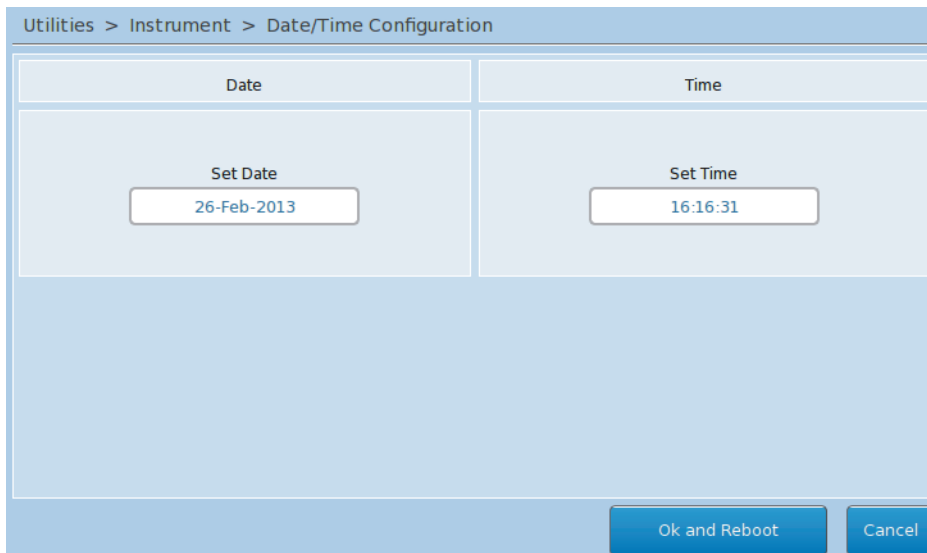

The image shows a software window titled "Utilities > Instrument > Date/Time Configuration". It is divided into two main sections: "Date" and "Time". Under "Date", there is a "Set Date" button and a text field displaying "26-Feb-2013". Under "Time", there is a "Set Time" button and a text field displaying "16:16:31". At the bottom right of the window, there are two buttons: "Ok and Reboot" and "Cancel".

Figure 161: Date/time configuration window area

The *Ok and Reboot* button changes the date and time settings and reboots the instrument.

Choosing the input fields opens the *Set Date* or *Set Time* dialog box, allowing the operator to specify the current time and date.

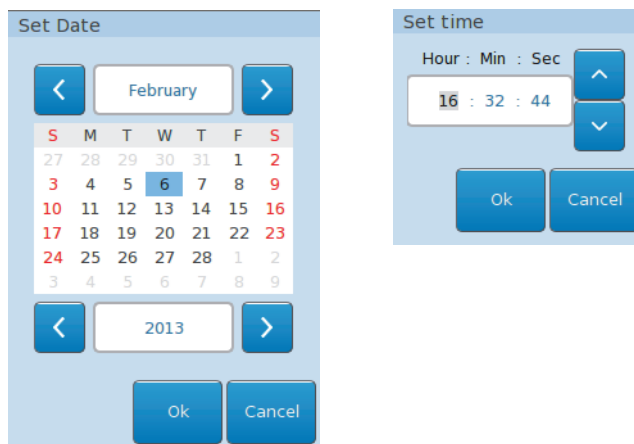

The image shows two separate dialog boxes. The "Set Date" dialog box on the left features a calendar grid for the month of February 2013, with the 6th of February selected. It includes navigation buttons for months and years, and "Ok" and "Cancel" buttons at the bottom. The "Set time" dialog box on the right displays the time "16 : 32 : 44" in a digital format, with up and down arrow buttons for each component (Hour, Min, Sec) and "Ok" and "Cancel" buttons at the bottom.

Figure 162: Set Date and Set Time dialog boxes

## 5.2 Configuration tab

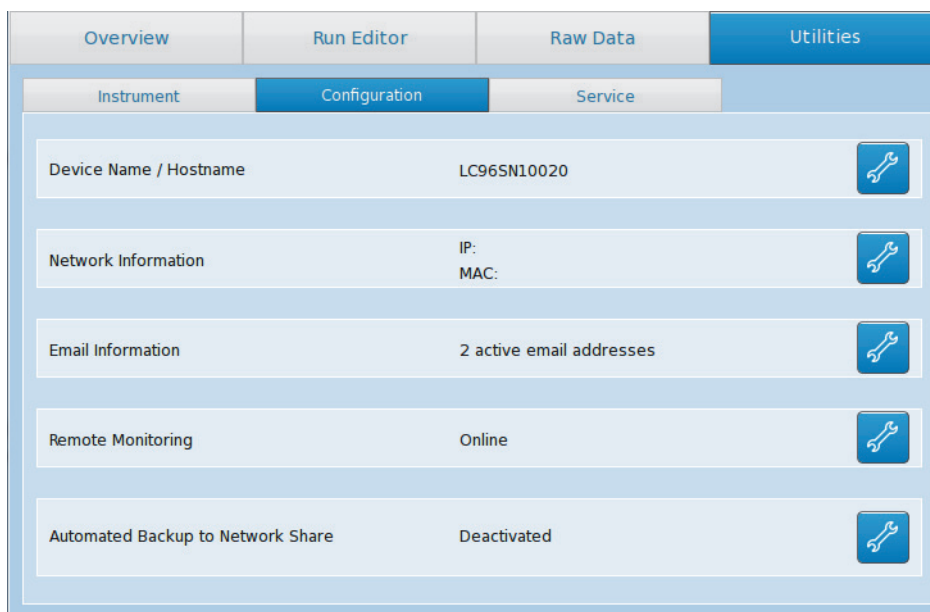

Figure 163: Utilities, Configuration tab

The *Configuration* tab displays the following configuration settings for the LightCycler® 96 Instrument and provides the associated configuration functions. Each function is accessed via the tools button next to the corresponding field:

| Setting                                  | Description                                                                                                                                                                                                                                                                                                                      |
|------------------------------------------|----------------------------------------------------------------------------------------------------------------------------------------------------------------------------------------------------------------------------------------------------------------------------------------------------------------------------------|
| <i>Device Name / Hostname</i>            | Host name of the instrument; the tools button opens the <i>Device Name / Hostname</i> window area, which allows for setting the host name of the LightCycler® 96 Instrument.<br>For detailed information, see section <a href="#">Device Name / Hostname</a> , on page 257.                                                      |
| <i>Network Information</i>               | IP address of the instrument in the network; the tools button opens the <i>Network Information</i> window area, which allows for configuring the LightCycler® 96 Instrument in the network.<br>For detailed information, see section <a href="#">Network Information</a> , on page 257.                                          |
| <i>Email Information</i>                 | The tools button opens the <i>Email Configuration</i> window area, which allows for setting up email notifications on different instrument states.<br>For detailed information, see section <a href="#">Email Information</a> , on page 259.                                                                                     |
| <i>Remote Monitoring</i>                 | Current remote monitoring status; the tools button opens the <i>Configure Remote Monitoring</i> window area, which allows for configuring the settings for remote monitoring of the instrument.<br>For detailed information, see section <a href="#">Remote Monitoring</a> , on page 262.                                        |
| <i>Automated Backup to Network Share</i> | Automated backup status; if the status is <i>Active</i> , the target directory is displayed. The tools button opens the <i>Configure Automated Backup</i> window area, which allows for defining the target directory.<br>For detailed information, see section <a href="#">Automated Backup to Network Share</a> , on page 263. |

### 5.2.1 Device Name / Hostname

The tools button next to the *Device Name / Hostname* field opens the *Device Name / Hostname* window area, which allows for setting the device name or host name of the LightCycler® 96 Instrument.

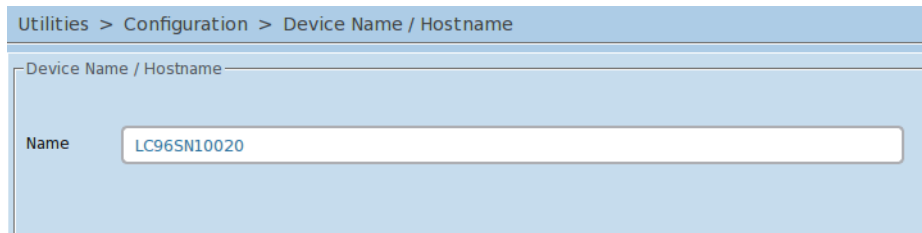

Figure 164: Device Name / Hostname window area

| Parameter   | Description                                                                                                                                                                                                                                                    |
|-------------|----------------------------------------------------------------------------------------------------------------------------------------------------------------------------------------------------------------------------------------------------------------|
| <i>Name</i> | Host name of the instrument to be used for identifying the instrument in the network; the software provides the instrument-specific default host name <i>LC96SN&lt;serial_number&gt;</i> .<br>Length: 3 to 256 characters<br>Allowed characters: a-z, A-Z, 0-9 |

### 5.2.2 Network Information

The tools button next to the *Network Information* field opens the *Network Information* window area, which allows for configuring (Ethernet) network settings.

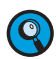

For detailed information on configuring the network settings, see section [Installing and configuring the LightCycler® 96 Instrument Software](#), on page 50.

The LightCycler® 96 Instrument Software provides two options:

- ▶ Automatic IP address assignment from a Dynamic Host Configuration Protocol (DHCP) server.
- ▶ Assigning IP address, gateway, and DNS server manually.

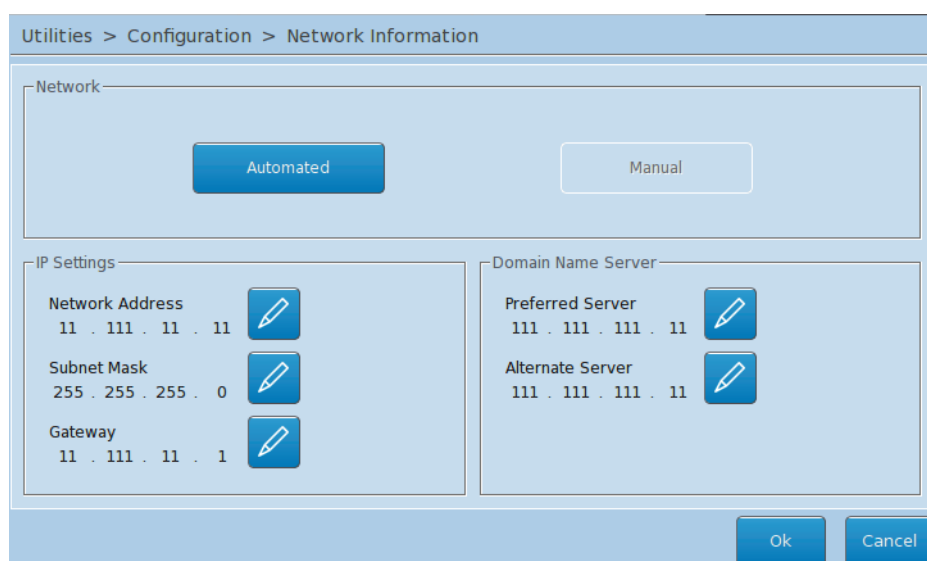

Figure 165: Network Information window area

| Setting            | Parameter        | Description                                                                                                                                                                                                                                                                                                                                                                                                                                                   |
|--------------------|------------------|---------------------------------------------------------------------------------------------------------------------------------------------------------------------------------------------------------------------------------------------------------------------------------------------------------------------------------------------------------------------------------------------------------------------------------------------------------------|
| Network            | Automated        | This setting is applied in all networks with a DHCP server providing IP addresses automatically to all hosts (default situation in most local networks). The IP address, subnet mask, default gateway address, and the DNS addresses are displayed in the corresponding fields.<br> <i>Prerequisite: A correctly configured DHCP server must be available on the network</i> |
|                    | Manual           | The IP address is to be assigned manually.                                                                                                                                                                                                                                                                                                                                                                                                                    |
| IP Settings        | Network Address  | IP address of the instrument                                                                                                                                                                                                                                                                                                                                                                                                                                  |
|                    | Subnet Mask      | Subnet mask of the instrument                                                                                                                                                                                                                                                                                                                                                                                                                                 |
|                    | Gateway          | Gateway of the instrument                                                                                                                                                                                                                                                                                                                                                                                                                                     |
| Domain Name Server | Preferred Server | IP address of the preferred server                                                                                                                                                                                                                                                                                                                                                                                                                            |
|                    | Alternate Server | IP address of the alternate server                                                                                                                                                                                                                                                                                                                                                                                                                            |

The pencil button next to the fields opens the corresponding *Network Address* window area, which allows for specifying the IP address:

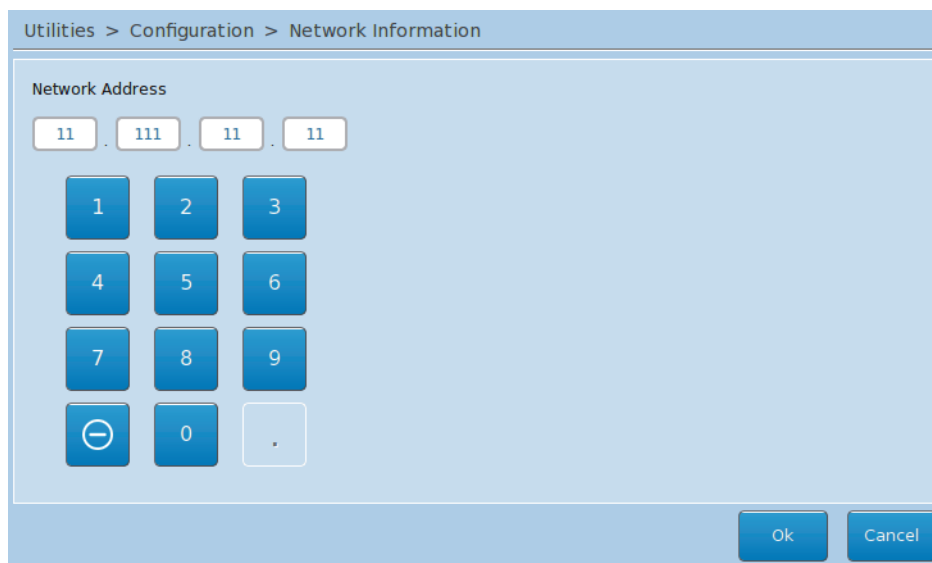

Figure 166: Network Address window area

### 5.2.3 Email Information

The tools button next to the *Email Information* field opens the *Email Information* window area, which provides the following functions:

- ▶ Defining up to 50 email addresses.
- ▶ Activating or deactivating these email addresses.
- ▶ Selecting the kind of information that is to be sent to the activated email addresses when the experiment run is finished or aborted.

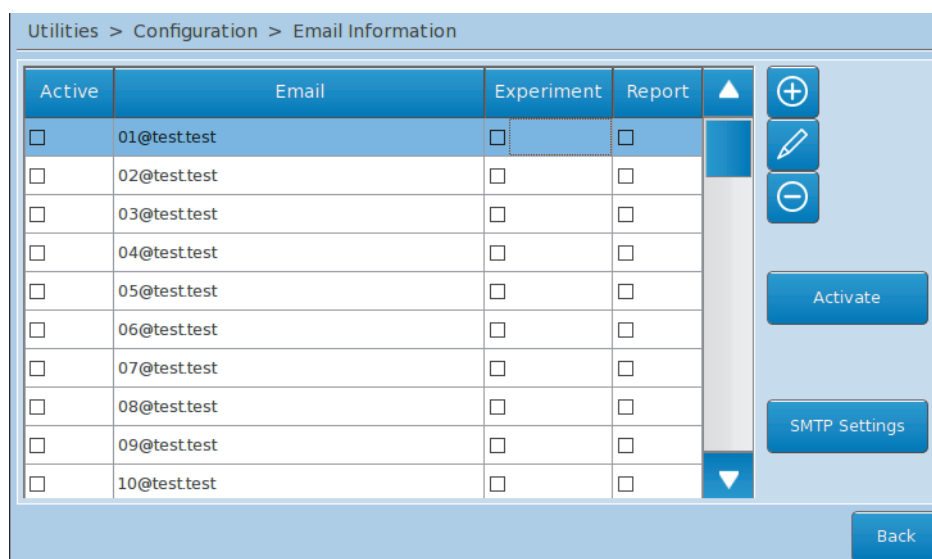

Figure 167: Email Information window area

The table in the *Email Information* window area provides the following information:

| Column            | Description                                                                                                                                                                                                                                                                                                                                                                                                                                                                                                                                                                                                                                                                                                                                                                                                                                        |
|-------------------|----------------------------------------------------------------------------------------------------------------------------------------------------------------------------------------------------------------------------------------------------------------------------------------------------------------------------------------------------------------------------------------------------------------------------------------------------------------------------------------------------------------------------------------------------------------------------------------------------------------------------------------------------------------------------------------------------------------------------------------------------------------------------------------------------------------------------------------------------|
| <i>Active</i>     | <p>Indicates whether the corresponding email address is activated.</p> <p>When activated, an email notification containing the status of the experiment is sent to the email address when the next experiment run is successfully finished or if it has been aborted.</p> <p> <i>After an experiment run, the activated email addresses are automatically deactivated.</i></p>                                                                                                                                                                                                                                                                                                                                                                                  |
| <i>Email</i>      | <p>Email address of the recipient.</p> <p>Operators can specify up to 50 recipients, using the <i>Add</i> button. For detailed information, see section <a href="#">Adding/Editing an email address</a>, on page 260.</p> <p> <i>Additionally, operators can link an email address to all experiments generated with the current software instance. The email address is specified in the LightCycler® 96 Application Software in the 'Preferences' dialog box. When an experiment generated with the corresponding application software instance is executed, an email notification containing the experiment file is automatically sent to the defined email address. For detailed information, see section <a href="#">Preferences</a>, on page 134.</i></p> |
| <i>Experiment</i> | <p>Indicates whether the experiment file is attached to the email notification when the experiment run is finished.</p>                                                                                                                                                                                                                                                                                                                                                                                                                                                                                                                                                                                                                                                                                                                            |

| Column        | Description                                                                                                                                                                                                                                                                                                                                                                                                                                                                        |
|---------------|------------------------------------------------------------------------------------------------------------------------------------------------------------------------------------------------------------------------------------------------------------------------------------------------------------------------------------------------------------------------------------------------------------------------------------------------------------------------------------|
| <i>Report</i> | Indicates whether a PDF email report is attached to the email notification when the experiment run is finished. The PDF report contains the following information: <ul style="list-style-type: none"> <li>▶ Raw data amplification curves and fluorescence plate map (for amplification program only) of all measured dyes</li> <li>▶ Run temperature profile</li> <li>▶ Experiment name</li> <li>▶ Plate ID</li> <li>▶ Creation date</li> <li>▶ Run start and end time</li> </ul> |

The emails list can be edited with the following buttons:

| Button                                                                            | Function | Description                                                                                                                                                                |
|-----------------------------------------------------------------------------------|----------|----------------------------------------------------------------------------------------------------------------------------------------------------------------------------|
|  | Add      | Adds a new email address to the list. For detailed information, see section <a href="#">Adding/Editing an email address</a> , below.                                       |
|  | Edit     | Opens a window area for editing the settings of the selected email address. For detailed information, see section <a href="#">Adding/Editing an email address</a> , below. |
|  | Remove   | Removes the selected email address from the list.                                                                                                                          |

The additional buttons in the *Email Information* window area provide the following functions:

| Button                     | Description                                                                                                                                                         |
|----------------------------|---------------------------------------------------------------------------------------------------------------------------------------------------------------------|
| <i>Activate/Deactivate</i> | Activates/Deactivates the selected email address.                                                                                                                   |
| <i>SMTP Settings</i>       | Opens a window area for editing the SMTP settings of the selected email address. For detailed information, see section <a href="#">SMTP Settings</a> , on page 261. |

### Adding/Editing an email address

The plus and the pencil button in the *Email Information* window area open a table for specifying the settings for a new email address.

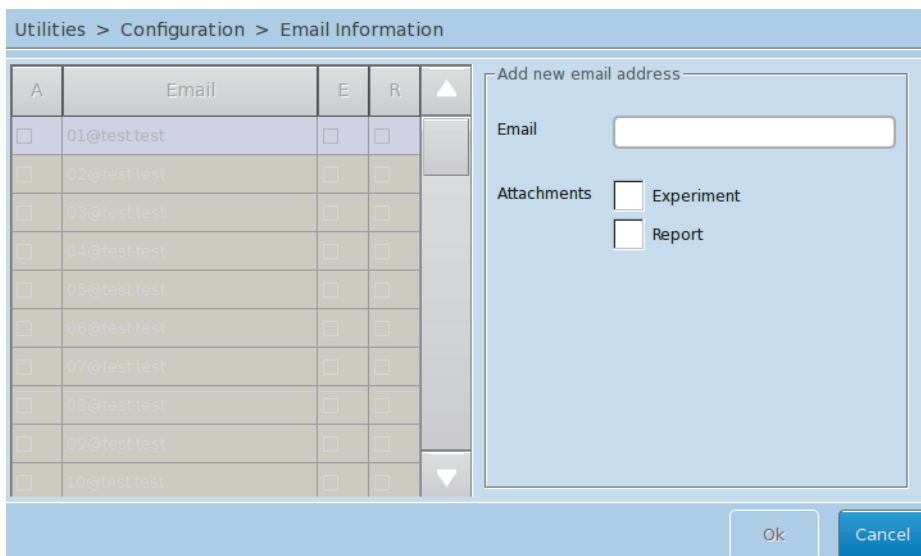

Figure 168: Email Configuration window area, Add/Edit

| Setting     |            | Description                                                                                                           |
|-------------|------------|-----------------------------------------------------------------------------------------------------------------------|
| Email       |            | Email address.                                                                                                        |
| Attachments | Experiment | Specifies whether the experiment file is attached to the email notification when the experiment run is finished.      |
|             | Report     | Specifies whether a PDF email report is to be attached to the email notification when the experiment run is finished. |

## SMTP Settings

The *SMTP Settings* button in the *Email Information* window area opens a dialog for specifying the SMTP settings for all email addresses.

Figure 169: Email Information window area, SMTP settings

| Parameter      | Description                                                                                                                                                                                                                                                       |
|----------------|-------------------------------------------------------------------------------------------------------------------------------------------------------------------------------------------------------------------------------------------------------------------|
| Server         | Name or IP address of the SMTP server to be used for sending emails.                                                                                                                                                                                              |
| Port           | Port number of the SMTP server.                                                                                                                                                                                                                                   |
| Encryption     | Encryption type to be used for the user account on the SMTP server: <ul style="list-style-type: none"> <li>▶ None: The server does not use encryption.</li> <li>▶ SSL: The server uses SSL encryption.</li> <li>▶ TLS: The server uses TLS encryption.</li> </ul> |
| Authentication | Indicates whether authentication with a user account/password combination is required by the SMTP server.                                                                                                                                                         |
| Username       | User name for the account.<br>The software uses this user name as sender identification for the instrument emails.                                                                                                                                                |
| Password       | Password to be used for the user account.                                                                                                                                                                                                                         |
| Test Address   | Specifies the email address to be used for the test mail.                                                                                                                                                                                                         |
| Send Test Mail | Sends a test email to the specified test address.                                                                                                                                                                                                                 |

### 5.2.4 Remote Monitoring

The remote monitoring function allows remote monitoring of the LightCycler® 96 Instrument by an operator. For detailed information, see section [Instrument Manager](#), on page 124.

The tools button next to the *Remote Monitoring* field opens the *Remote Monitoring* window area.

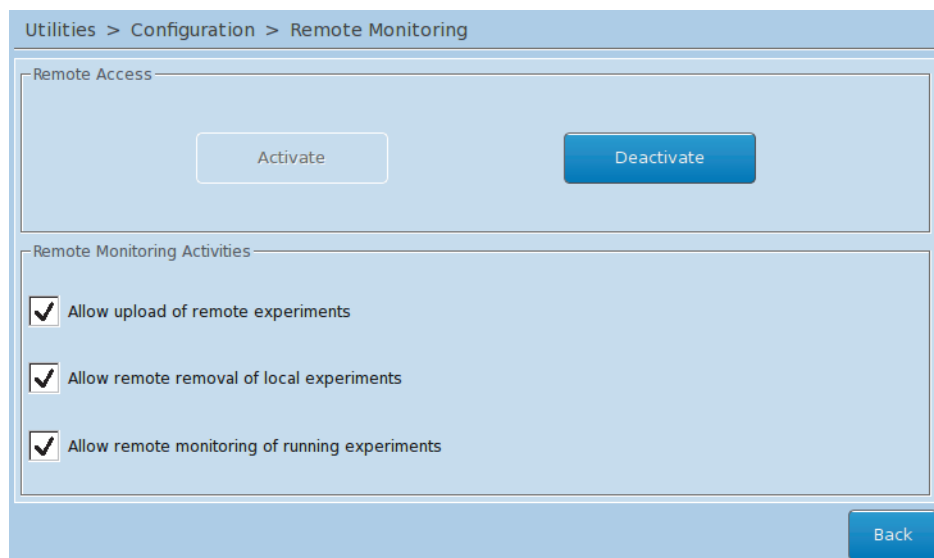

Figure 170: Remote Monitoring window area

| Setting                             |                                                       | Description                                                                                                                                                                                                                                 |
|-------------------------------------|-------------------------------------------------------|---------------------------------------------------------------------------------------------------------------------------------------------------------------------------------------------------------------------------------------------|
| <i>Remote Access</i>                | <i>Activate/Deactivate</i>                            | Enables/disables remote monitoring of the instrument and sending or receiving of experiment files.                                                                                                                                          |
| <i>Remote Monitoring Activities</i> | <i>Allow upload of remote experiments</i>             | Allows for sending experiment files from the LightCycler® 96 Application Software to the instrument. For detailed information, see section <a href="#">To send an experiment to an instrument</a> , on page 129.                            |
|                                     | <i>Allow remote removal of local experiments</i>      | Allows for deleting experiment files remotely controlled from the instrument by the LightCycler® 96 Application Software. For detailed information, see section <a href="#">To retrieve an experiment from an instrument</a> , on page 129. |
|                                     | <i>Allow remote monitoring of running experiments</i> | Allows for monitoring an experiment run in the LightCycler® 96 Application Software. For detailed information, see section <a href="#">Online Monitoring tab</a> , on page 130.                                                             |

### 5.2.5 Automated Backup to Network Share

The automated backup function allows for defining a target directory (network share) to which a copy of the last executed experiment is automatically sent. If the network share is not accessible, the experiment is only saved locally on the instrument. A warning is issued when the automated backup function is activated, but not when it is deactivated.

The tools button next to the *Automated Backup to Network Share* field opens the *Automated Backup to Network Share* window area.

Utilities > Configuration > Automated Backup to Network Share

Automated Backup to Network Share

Activate Deactivate

Automated Backup to Network Share

Share Path //sharename/path/to/directory

☒ Authentication Username Password Domain

Test Connection

Back

Figure 171: Automated Backup to Network Share window area

| Setting                    | Description                                                             |
|----------------------------|-------------------------------------------------------------------------|
| <i>Activate/Deactivate</i> | Enables/disables the automated backup.                                  |
| <i>Share-Path</i>          | Full path of the network share where a copy of the experiment is saved. |
| <i>Authentication</i>      | Indicates whether authentication is required.                           |
| <i>Username</i>            | User name for the account.                                              |
| <i>Password</i>            | Password to be used for the user account.                               |
| <i>Domain</i>              | Domain name for the user account.                                       |
| <i>Test Connection</i>     | Tests the connection from the instrument to the network share.          |

## 5.3 Service tab

The *Service* tab provides the following functions:

- ▶ Setting up the Axeda client; see section [Axeda Service Client](#), on page 264.
- ▶ Backing up and restoring the configuration settings of the instrument; see section [Backup/Restore/Reset](#), on page 267.
- ▶ Recalibrating the touchscreen; see section [Recalibrate Touch Screen](#), on page 269.
- ▶ Exporting log files; see section [Lock Instrument for Transportation](#), on page 271.
- ▶ Preparing the instrument for transportation; see section [Lock Instrument for Transportation](#), on page 271.

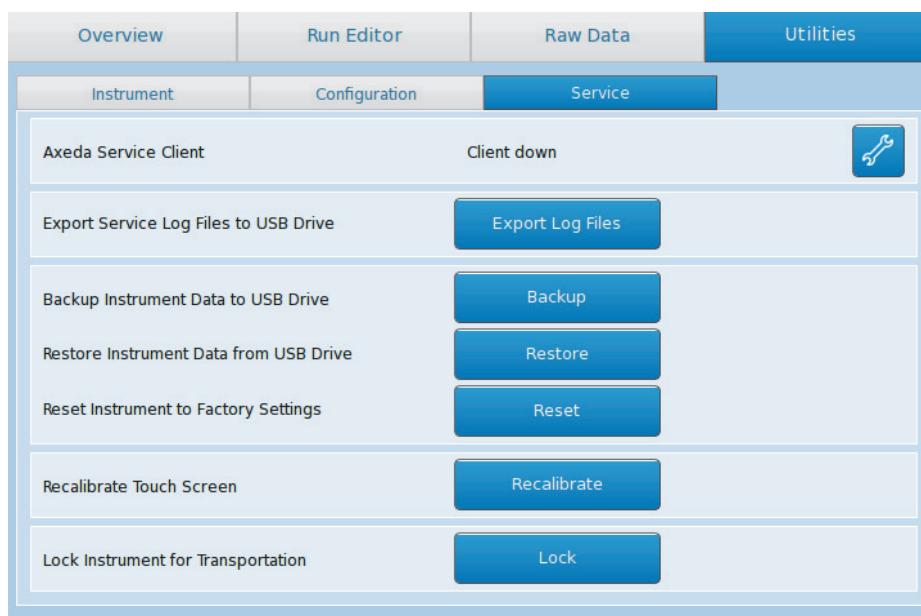

Figure 172: Utilities, Service tab

### 5.3.1 Axeda Service Client

The Axeda client installed on the LightCycler® 96 Instrument enables an operator to allow remote access by a Roche field service engineer. For detailed information, see section [Remote service](#), on page 304.

| Button            | Description                                                                                                                                                                                               |
|-------------------|-----------------------------------------------------------------------------------------------------------------------------------------------------------------------------------------------------------|
| <i>Activate</i>   | Activates the Axeda client; remote access to the instrument is allowed. The operator can continue working without restrictions.                                                                           |
| <i>Deactivate</i> | Deactivates the Axeda client; remote access to the instrument is not possible.                                                                                                                            |
| Tools button      | Opens the <i>Axeda Client Configuration</i> window area, which allows for setting up the Axeda client.<br>For detailed information, see section <a href="#">Axeda client configuration</a> , on page 265. |

## Axeda client configuration

The tools button next to the *Axeda Service Client up/down* field opens the *Axeda Client Configuration* window area, which allows for setting up the Axeda client.

Figure 173: Axeda Client Configuration window area

| Setting                          |                                                    | Description                                                                                                                                                                                                                |
|----------------------------------|----------------------------------------------------|----------------------------------------------------------------------------------------------------------------------------------------------------------------------------------------------------------------------------|
| <i>Axeda Client Activation</i>   | <i>Activate</i>                                    | Activates the Axeda client; remote access to the instrument is allowed. The operator can continue working without restrictions.                                                                                            |
|                                  | <i>Deactivate</i>                                  | Deactivates the Axeda client; remote access to the instrument is not possible.                                                                                                                                             |
| <i>Axeda Client Status</i>       | <i>Current Status</i>                              | Current status of the Axeda client: <i>Online</i> or <i>Offline</i> .                                                                                                                                                      |
|                                  | <i>Automated Deactivation</i>                      | Date and time of the last automated Axeda client deactivation.<br> <i>The Axeda client is automatically deactivated after 24 hours.</i> |
|                                  | <i>Data Transfer</i>                               | Date and time of the last data transfer.                                                                                                                                                                                   |
| <i>Export User Data to Axeda</i> | <i>Experiments/ Log Files/ Configuration Files</i> | Specifies which data are to be exported for access by the Roche field service engineer.                                                                                                                                    |
|                                  | <i>Export</i>                                      | Exports the specified data.                                                                                                                                                                                                |

### 5.3.2 Export Service Log Files to USB Drive

The *Export Log Files* button opens the *Export Service Log Files* window area, which allows for exporting the instrument log files to a connected USB drive.

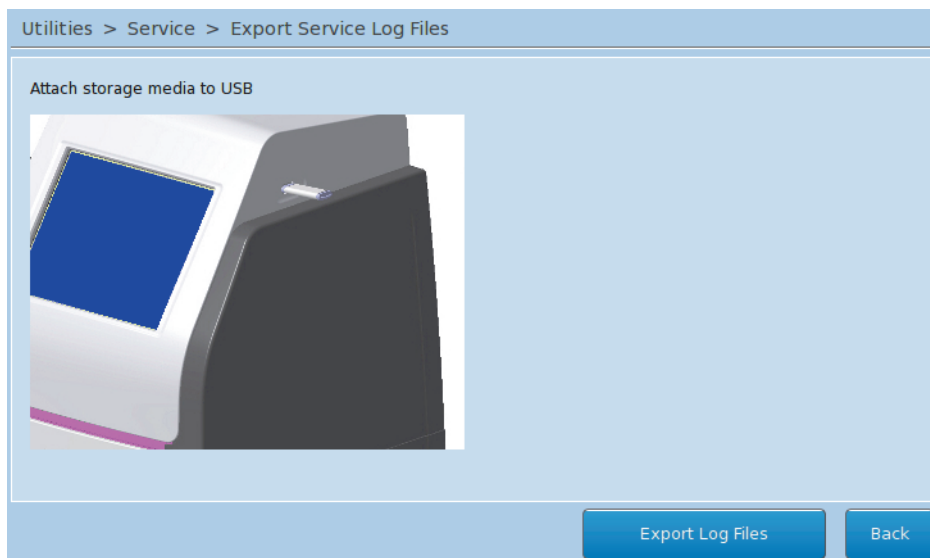

**Figure 174: Export Service Log Files window area**

Choosing *Export Log Files* packs the log files into a \*.zip archive with a time stamp and saves them to the USB drive.

For detailed information on error messages and corrective actions, see chapter [Troubleshooting](#), on page 293.

### 5.3.3 Backup/Restore/Reset

The backup/restore function allows for saving the instrument configuration to a connected USB drive and restoring the configuration if necessary.

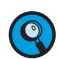

*It is possible to restore the configuration settings (except experiments) saved from a previous LightCycler® 96 Instrument Software version to an updated software version.*

#### Backup Instrument Data to USB Drive

The *Backup* button opens the *Backup Instrument Data* window area for specifying the data to be saved:

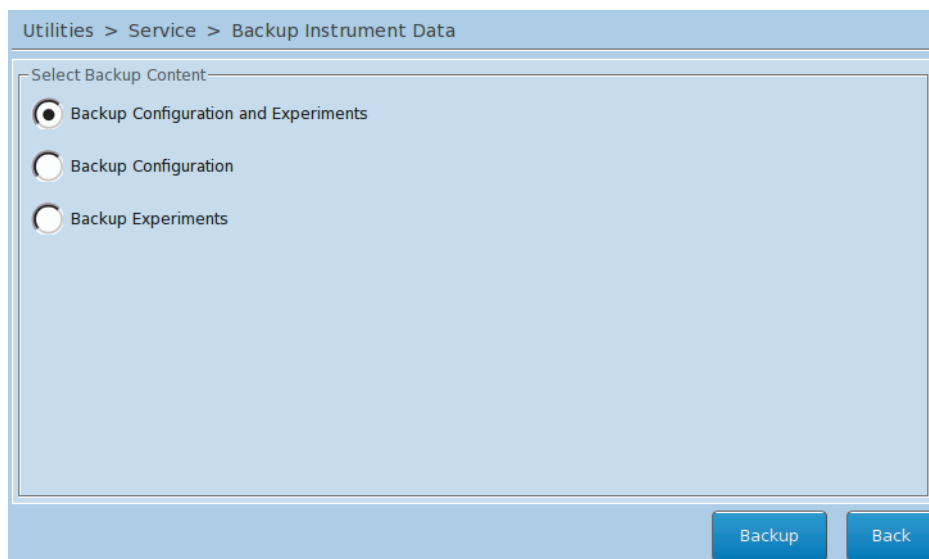

Figure 175: Backup Instrument Data window area

| Setting                                     | Description                                                                                                                                                                                                                                     |
|---------------------------------------------|-------------------------------------------------------------------------------------------------------------------------------------------------------------------------------------------------------------------------------------------------|
| <i>Backup Configuration and Experiments</i> | The backup saves all experiment files and the following configuration settings: <ul style="list-style-type: none"> <li>▶ Network and email configuration</li> <li>▶ Axeda client configuration</li> <li>▶ Remote monitoring settings</li> </ul> |
| <i>Configuration</i>                        | The backup only saves the configuration settings.                                                                                                                                                                                               |
| <i>Experiments</i>                          | The backup only saves all experiment files.                                                                                                                                                                                                     |

Choosing *Backup* packs the backup files and saves them to the USB drive.

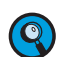

*LightCycler® 96 Software Version 1.0 experiments cannot be restored in version 1.1. Thus, for backup of version 1.0 settings it is recommended to select 'Backup Configuration' only.*

## Restore Instrument Data from USB Drive

The *Restore* button opens the *Restore Instrument Data* window area for specifying the backup file to be restored:

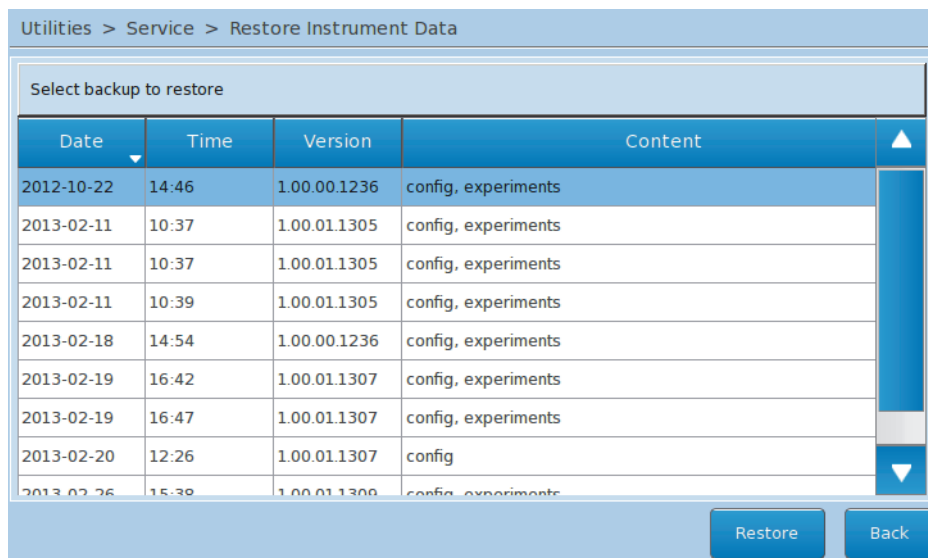

**Figure 176: Restore Instrument Data window area**

The list in the window area provides the date, time, version, and content of all backup files available on the USB drive.

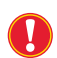

*Restoring the configuration is only possible if the configuration has been backed up successfully beforehand.*

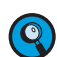

*LightCycler® 96 Software Version 1.0 experiment files cannot be restored in version 1.1.*

Choosing *Restore* restores the configuration settings and experiment files from the backup directory on the connected USB drive.

## Reset Instrument to Factory Settings

The *Reset* button sets the instrument back to its factory settings:

- ▶ All configuration settings are reset to factory settings.
- ▶ All experiment files on the instrument are deleted.

### 5.3.4 Recalibrate Touch Screen

The *Recalibrate* button opens a screen which allows for recalibrating the center of the buttons on the touchscreen.

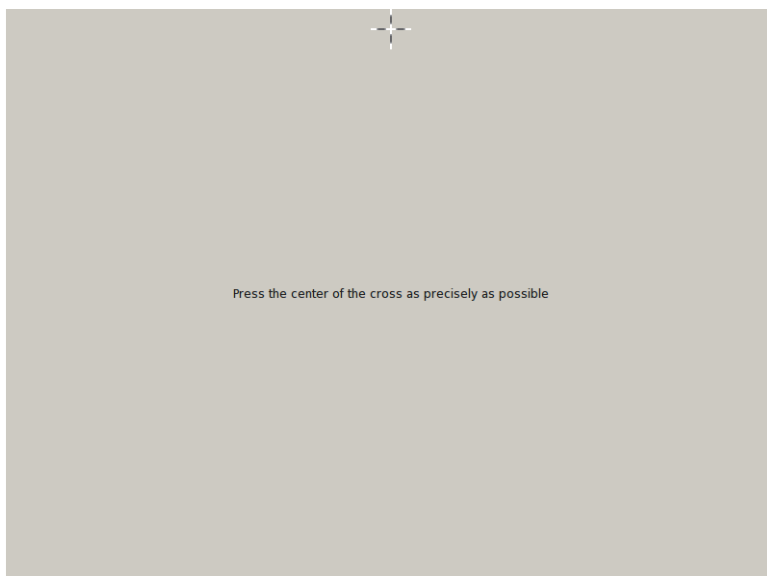

Figure 177: Recalibrate window

#### To recalibrate the touchscreen

- 1 On the *Service* tab, choose *Recalibrate*.  
The recalibrate screen opens, showing a cross at the top.

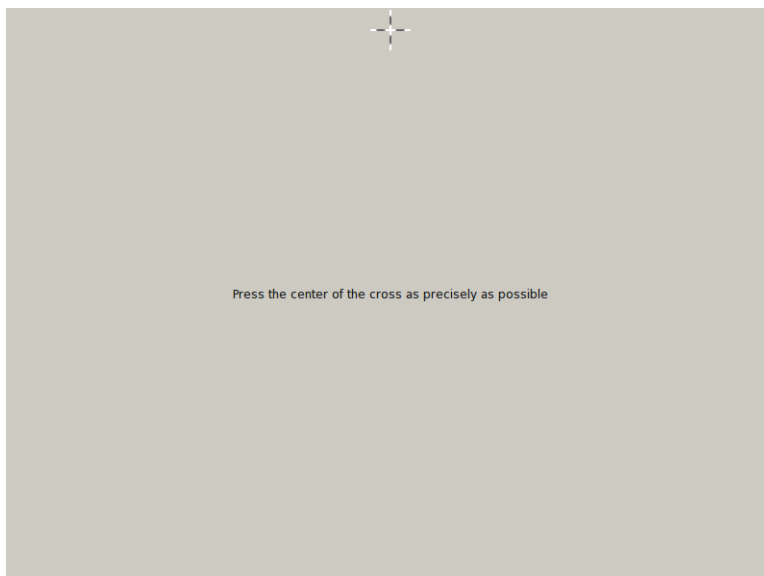

- 2 Accurately tip the cross. It is then displayed on the right side of the screen.
- 3 Accurately tip the cross again. It is then displayed in the lower left corner of the screen.

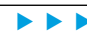

- 4 Accurately tip the cross again. A screen containing an *OK* button is displayed.

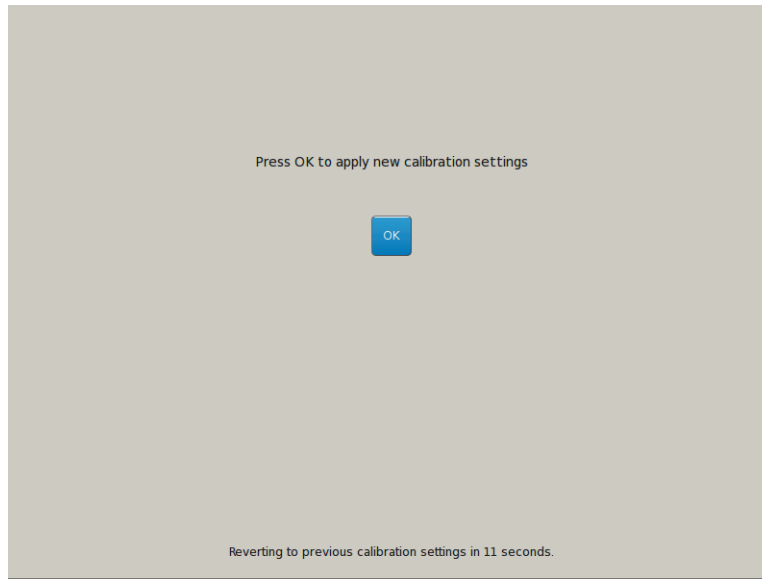

- 5 Choose *OK*.  
The calibration screen closes and the *Service* tab is displayed using the updated touchscreen calibration.

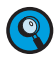

*If you do not choose 'OK' during 30 seconds, the touchscreen reverts to the previous calibration settings.*

C

### 5.3.5 Lock Instrument for Transportation

The *Lock* button locks the loading module for transport. The operator is prompted to confirm that the transport locking device is inserted. For detailed information on the transport locking device, see section [Assembling the instrument](#), on page 44.

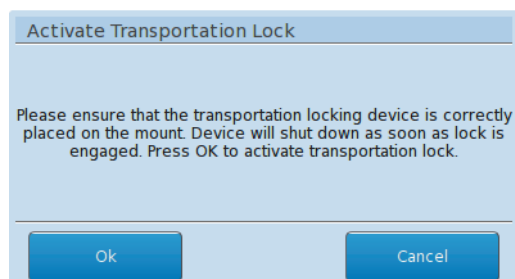

Figure 178: Activate Transport Lock dialog box

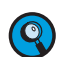

*It is also necessary for transport to tighten the fixation gripper on the back of the instrument. For detailed information on the fixation gripper, see section [To unpack and install the LightCycler® 96 Instrument](#), on page 44.*

C

## 6 Alarms and messages

All messages, that is, software, data, and instrument messages, are logged in a message table. They are displayed in the alarms window area.

| Alarm icon                                                                        | Date and time                  | Message text                                           |
|-----------------------------------------------------------------------------------|--------------------------------|--------------------------------------------------------|
|  | 03-May-2012 13:53:39: 25300008 | Dynamic integration was limited to maximal value.      |
|  | 02-May-2012 16:46:41: 26700128 | Experiment validation Failed. Please review Experiment |
|  | 02-May-2012 16:46:37: 26700096 | Unable to start experiment without channels.           |
| Message type                                                                      | Error code                     |                                                        |

**Figure 179: Alarms window area**

Each message contains the following information:

- ▶ The message type: *Warning* or *Error*.
- ▶ The date and time when the error occurred.
- ▶ The error code of the message.
- ▶ The message text.

### Displaying and confirming messages

The LightCycler® 96 Instrument Software provides the following options for viewing messages and alarms in general or in detail:

- ▶ The alarms window area in the main window; see section [Alarms window area](#), on page 226.
- ▶ The *Unconfirmed Alarms* tab in the *Alarm History* which displays all unconfirmed messages; see section [Unconfirmed Alarms tab](#), on page 273.
- ▶ The *Confirmed Alarms* tab in the *Alarm History* which displays all confirmed messages; see section [Confirmed Alarms tab](#), on page 274.
- ▶ The *Detail Information* window area which displays the details for a selected message; see section [Detailed information](#), on page 275.

## 6.1 Alarm history

Choosing the alarm icon in the alarms window area opens the *Alarm History*.

### Unconfirmed Alarms tab

The *Unconfirmed Alarms* tab displays a summary of all unconfirmed messages.

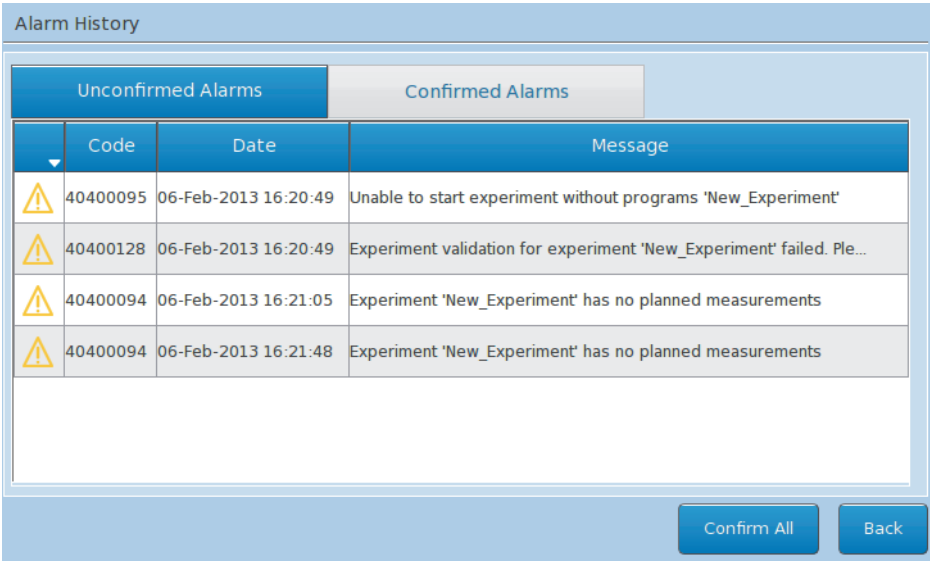

|   | Code     | Date                 | Message                                                              |
|---|----------|----------------------|----------------------------------------------------------------------|
| ⚠ | 40400095 | 06-Feb-2013 16:20:49 | Unable to start experiment without programs 'New_Experiment'         |
| ⚠ | 40400128 | 06-Feb-2013 16:20:49 | Experiment validation for experiment 'New_Experiment' failed. Ple... |
| ⚠ | 40400094 | 06-Feb-2013 16:21:05 | Experiment 'New_Experiment' has no planned measurements              |
| ⚠ | 40400094 | 06-Feb-2013 16:21:48 | Experiment 'New_Experiment' has no planned measurements              |

Figure 180: Alarm History, Unconfirmed Alarms tab

The table provides the following information:

| Column     | Description                                                                             |
|------------|-----------------------------------------------------------------------------------------|
| Alarm icon | Severity of the alarm; operators can sort the log report by the severity of the alarms. |
| Code       | Error code of the message.                                                              |
| Date       | Date and time the message occurred.                                                     |
| Message    | Message text.                                                                           |

- ▶ For detailed information on how to work with tables, see section [Working with tables](#), on page 228.
- ▶ For detailed information on error messages and corrective actions, see chapter [Troubleshooting](#), on page 293.

### To confirm all unconfirmed messages

- 1 Choose the alarm icon in the message area. The *Alarm History* opens.
- 2 Open the *unconfirmed Alarms* tab.
- 3 Choose *Confirm All*.
  - ▶ The messages are removed from the list.
  - ▶ The Alarm History closes.
  - ▶ The alarm icon in the message area changes color to the highest level of any unconfirmed alarm.

## Confirmed Alarms tab

The *Confirmed Alarms* tab displays a summary of all confirmed messages.

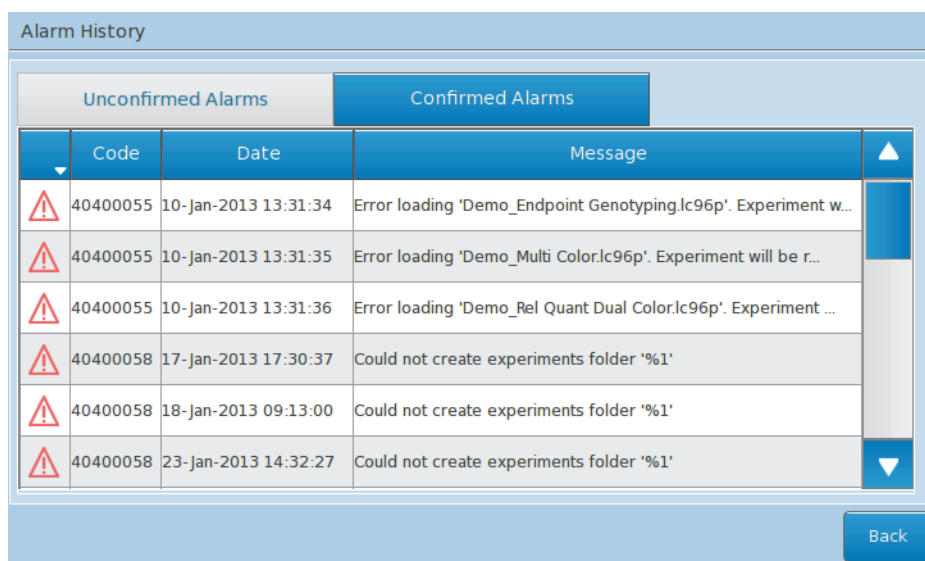

| Alarm History      |          |                      |                                                                 |
|--------------------|----------|----------------------|-----------------------------------------------------------------|
| Unconfirmed Alarms |          | Confirmed Alarms     |                                                                 |
|                    | Code     | Date                 | Message                                                         |
| ⚠                  | 40400055 | 10-Jan-2013 13:31:34 | Error loading 'Demo_Endpoint Genotyping.lc96p'. Experiment w... |
| ⚠                  | 40400055 | 10-Jan-2013 13:31:35 | Error loading 'Demo_Multi Color.lc96p'. Experiment will be r... |
| ⚠                  | 40400055 | 10-Jan-2013 13:31:36 | Error loading 'Demo_Rel Quant Dual Color.lc96p'. Experiment ... |
| ⚠                  | 40400058 | 17-Jan-2013 17:30:37 | Could not create experiments folder '%1'                        |
| ⚠                  | 40400058 | 18-Jan-2013 09:13:00 | Could not create experiments folder '%1'                        |
| ⚠                  | 40400058 | 23-Jan-2013 14:32:27 | Could not create experiments folder '%1'                        |

**Figure 181: Alarm History, Confirmed Alarms tab**

The table provides the following information:

| Column     | Description                                                                             |
|------------|-----------------------------------------------------------------------------------------|
| Alarm icon | Severity of the alarm; operators can sort the log report by the severity of the alarms. |
| Code       | Error code of the message.                                                              |
| Date       | Date and time the message occurred.                                                     |
| Message    | Message text.                                                                           |

- ▶ For detailed information on how to work with tables, see section [Working with tables](#), on page 228.
- ▶ For detailed information on error messages and corrective actions, see chapter [Troubleshooting](#), on page 293.

## 6.2 Detailed information

Choosing a message in the alarms window area or in the *Alarm History* opens the *Detail Information* window area, which displays the details for a selected message:

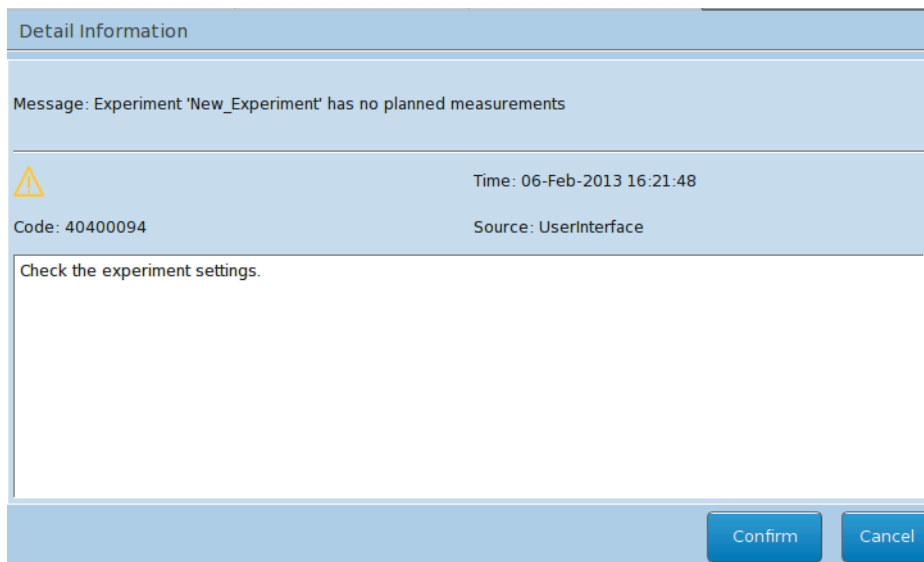

Figure 182: Detail Information window area

### To confirm a single message

- 1 Choose the corresponding message in the alarms window area or in the *Alarm History*. The *Detail Information* window area opens, displaying detailed information for the selected message.
- 2 Choose *Confirm*.
  - ▶ The *Detail Information* closes.
  - ▶ The message is removed from the alarms window area.
  - ▶ The alarm icon in the message area changes color to the highest level of any unconfirmed alarm.

# 7 Help browser

The *Help* button in the global action bar opens the help browser of the LightCycler® 96 Instrument. The help browser provides information on the currently open tab of the LightCycler® 96 Instrument Software (in this example, the *Service* tab help text is shown).

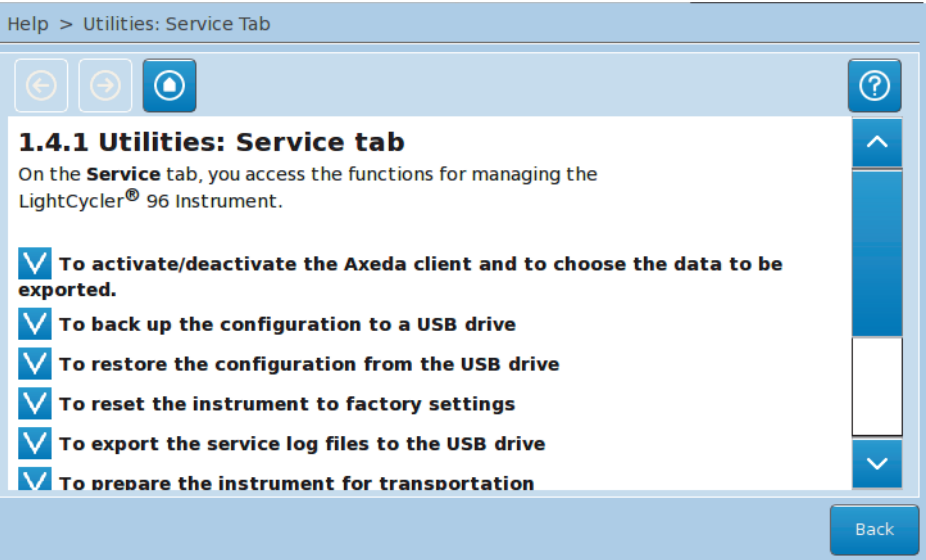

Figure 183: Help browser

The buttons in the help browser provide the following functions:

| Button                                                                              | Description                           |
|-------------------------------------------------------------------------------------|---------------------------------------|
|  | Changes to the previous visited page. |
|  | Changes to the next visited page.     |
|  | Opens the table of contents.          |
|  | Opens the "Help on help" text.        |
|  | Closes the help browser.              |

## Links

Links in the help text are indicated by an arrow button. The help browser provides two types of links:

| Link                                                                                                            | Description                                                                                                                                                                                                                                            |
|-----------------------------------------------------------------------------------------------------------------|--------------------------------------------------------------------------------------------------------------------------------------------------------------------------------------------------------------------------------------------------------|
|  <b>Bold continuous text</b> | An arrow pointing right indicates a link to a related topic. The bold text shows the link target.<br>Choosing the button switches to the other text.                                                                                                   |
|  <b>Bold continuous text</b> | An down arrow indicates hidden text. The bold text shows the subcket of the hidden text. <ul style="list-style-type: none"><li>▶ Choosing the button displays the hidden text.</li><li>▶ Choosing the button again hides the displayed text.</li></ul> |

# **Chapter D**

## **Cleaning and care**

*D*

| <b>D</b> | <b>Cleaning and care</b>                                                                      | <b>277</b> |
|----------|-----------------------------------------------------------------------------------------------|------------|
| <b>1</b> | <b>General maintenance</b> .....                                                              | <b>279</b> |
| <b>2</b> | <b>Cleaning instructions</b> .....                                                            | <b>279</b> |
| <b>3</b> | <b>Unlocking the loading module</b> .....                                                     | <b>281</b> |
| <b>4</b> | <b>Exchanging the ventilation dust filters</b> .....                                          | <b>283</b> |
| <b>5</b> | <b>Handling fuses</b> .....                                                                   | <b>285</b> |
| <b>6</b> | <b>Packing the instrument for shipping</b> .....                                              | <b>287</b> |
| 6.1      | Placing the transport locking device, if the instrument initializes .....                     | 287        |
| 6.2      | Placing the transport locking failure state foam, if the instrument does not initialize ..... | 289        |
| 6.3      | Packing the instrument .....                                                                  | 290        |



# Cleaning and care

This chapter provides basic cleaning instructions and describes how to exchange fuses and dust filters of the LightCycler® 96 Instrument.

## 1 General maintenance

The LightCycler® 96 Instrument is maintenance-free.

### Precautions

The area around the LightCycler® 96 Instrument should be checked regularly to ensure that the air flow is unrestricted and that books, papers, or other items are not interfering with the air flow. For detailed requirements, see section [Installation requirements](#), on page 42.

## 2 Cleaning instructions

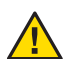

### Caution!

*Do not clean the LightCycler® 96 Instrument when it is plugged in.*

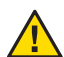

### Caution!

*Do not pour fluids into the loading module, thermal block cycler, or the interior of the instrument.*

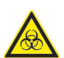

### Caution!

*As with all potentially biohazardous specimens, universal safety precautions should be taken when handling and processing samples. Spills should be immediately disinfected with an appropriate disinfectant solution to avoid contamination of laboratory personnel or equipment. Handling and disposal of infectious material should be performed according to local safety guidelines.*

### General cleaning

Regular cleaning of the LightCycler® 96 Instrument and accessories is not required.

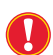

*Use only the detergents recommended below for cleaning.*

### To clean the housing

1

Switch off the instrument.

2

Clean the housing of the instrument with a mild commercial detergent.

3

If necessary, use 70% ethanol to disinfect the instrument housing.

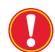

*Do not aim sprays directly at the instrument, as malfunctions of the electronics may occur.*

### To clean the touchscreen

- 1 Switch off the instrument.
- 2 If the display is contaminated, gently wipe it with a dry, soft, lint-free or microfiber cloth.  
If the display is still not completely clean, moisten the cloth with one of the following solvents:
  - ▶ Isopropyl alcohol
  - ▶ Ethyl alcohol



*Other solvents could damage the polarizer. Especially, do not use water, ketone, or aromatic solvents.*
- 3 Wipe the screen in a gentle motion to remove dust, oil, or fingerprint smudges.
 



*Do not spray cleaners directly onto the touchscreen.*

### To clean the thermal block cycler

- 1 Switch off the instrument.
- 2 Clean the thermal block cycler with a mild commercial detergent.
- 3 If necessary, use 70% ethanol to disinfect the thermal block cycler.
 



*Do not aim sprays directly at the instrument, as malfunctions of the electronics may occur.*

### To clean the multiwell plate mount

- 1 Eject the loading module and switch off the instrument.
- 2 Pipette 125 µl of 70% ethanol or isopropanol into each well.
 



*Do not aim sprays directly at the instrument, as malfunctions of the electronics may occur.*  
*Make sure that no liquid passes between mount and cover, as malfunctions of the electronics may occur.*  
*Take care not to destroy the block coating, for example, by scrubbing with sharp edged or pointed objects.*
- 3 After waiting 15 minutes pipette up and down several times.
- 4 Remove the liquid.
- 5 Let the multiwell plate mount dry before using it again.
- 6 Close the loading module and switch on the instrument.

D

### 3 Unlocking the loading module

The loading module of the LightCycler® 96 Instrument is locked after loading the multiwell plate and during the subsequent experiment run. It is unlocked when the experiment run is finished.

If the loading module is stuck, for example, after an experiment run, the operator can unlock it using the hexagon socket screw on the back of the instrument.

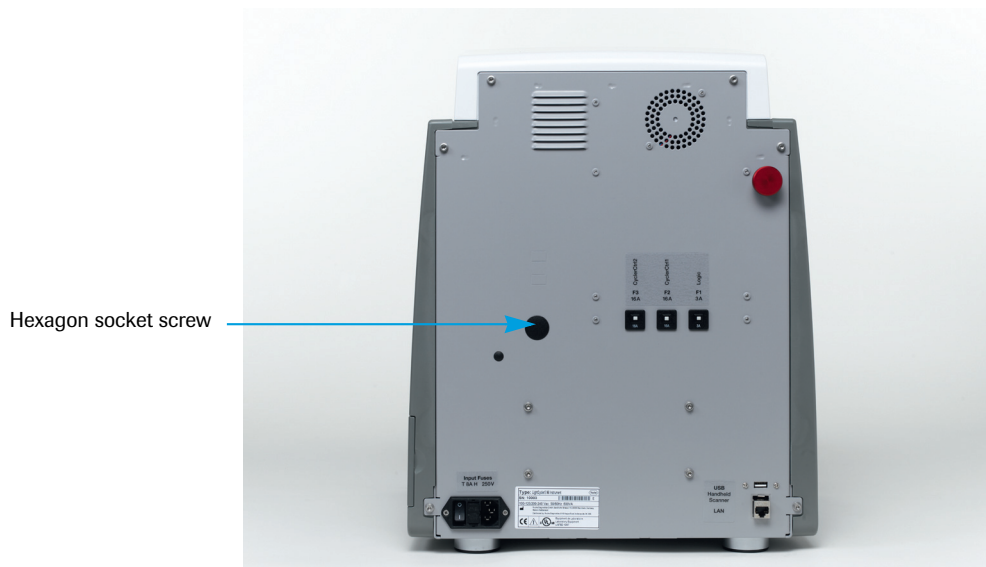

**Figure 184: LightCycler® 96 Instrument back view with hexagon socket screw**

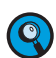

*To gain access to the hexagon socket screw, operators must first remove the cover.*

#### To unlock the loading module

- 1 Switch off the instrument and unplug the mains power cable.
- 2 On the back of the instrument, release the cover of the hexagon socket screw.
- 3 Use a 5.0 mm hex key to unlock the loading module:  
To open the loading module, turn the hex key counter-clockwise.

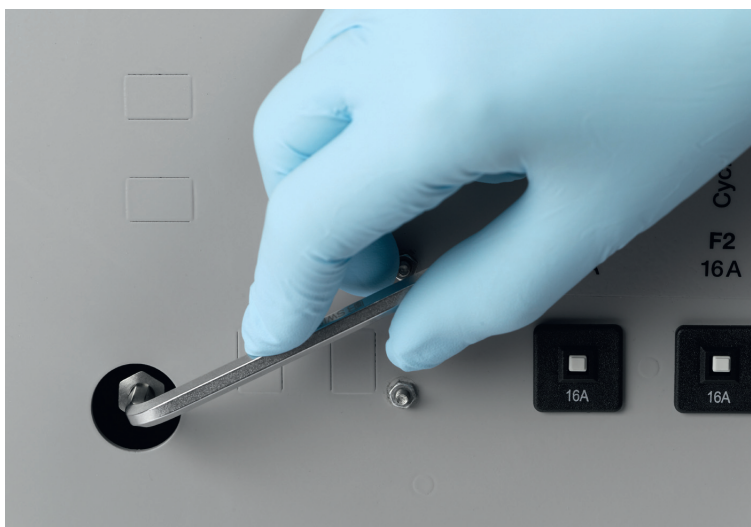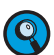

*The hex key is not part of the LightCycler® 96 System Package.*

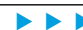

- 
- 4 Turn the hex key clockwise, to close the loading module again.
  - 5 Restart the instrument to verify that the loading module is in the correct position.
- 

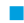

*D*

## 4 Exchanging the ventilation dust filters

The electronic rack of the LightCycler® 96 Instrument is cooled by ventilation. The ventilation inlet is located in the lower right corner of the right side of the instrument. To avoid any contamination of the instrument interior by dust particles, this ventilation inlet is fitted with a dust filter. Two replacement dust filters come with the LightCycler® 96 System Package.

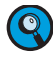

*The dust filter should be checked and cleaned or exchanged when dusty. You can order replacement dust filters from your local Roche Diagnostics representative.*

### To exchange the ventilation dust filter

- 1 Remove the cover of the ventilation inlet.

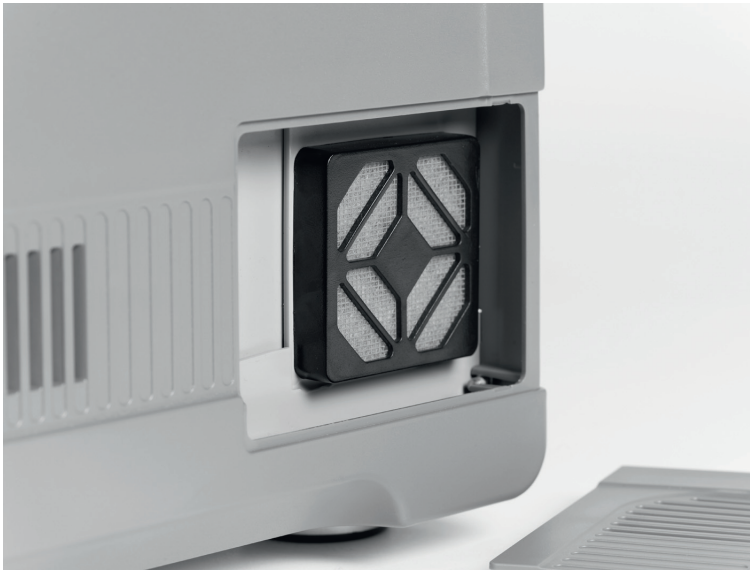

- 2 Remove the ventilation dust filter carrier.

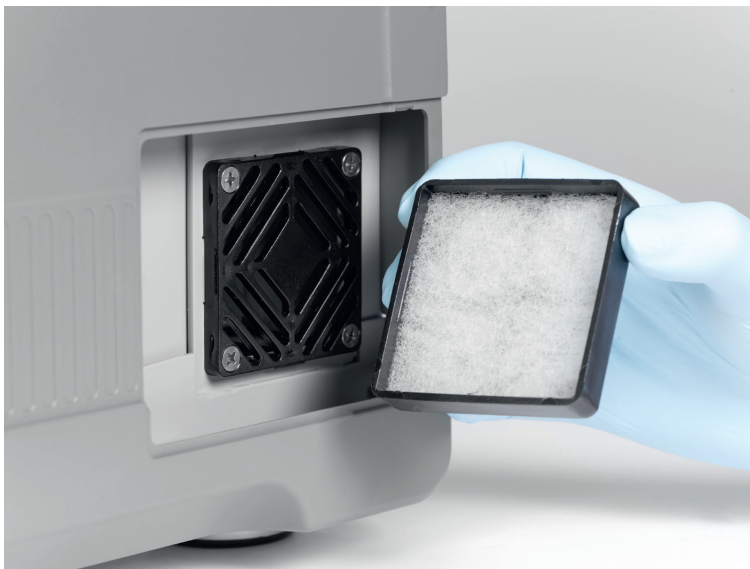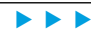

- 3 Remove the used dust filter from the carrier and insert a new filter.

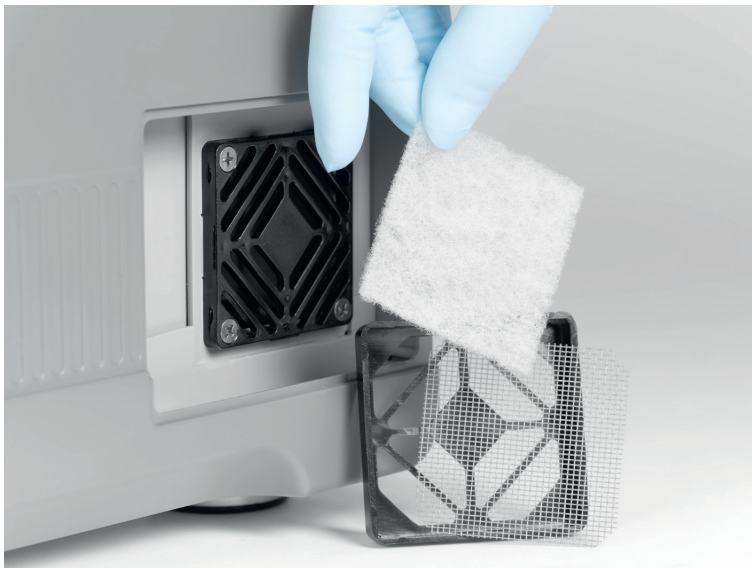

- 4 Replace the dust filter carrier on the ventilation inlet.
- 5 Close the cover of the ventilation inlet.

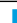

D

## 5 Handling fuses

The LightCycler® 96 Instrument contains two types of fuses:

- ▶ Three circuit breakers on the back of the instrument.
- ▶ Two electrical backup fuses for the mains power supply (115 V/230 V).

### Circuit breakers

The circuit breakers on the back of the instrument can have the following states:

| Circuit breaker status | Description                                                                                                       |
|------------------------|-------------------------------------------------------------------------------------------------------------------|
| Switch in place        | The fuse is working properly.                                                                                     |
| Switch tripped         | The fuse has blown and the circuit is interrupted.<br>The operator can close the circuit by resetting the switch. |

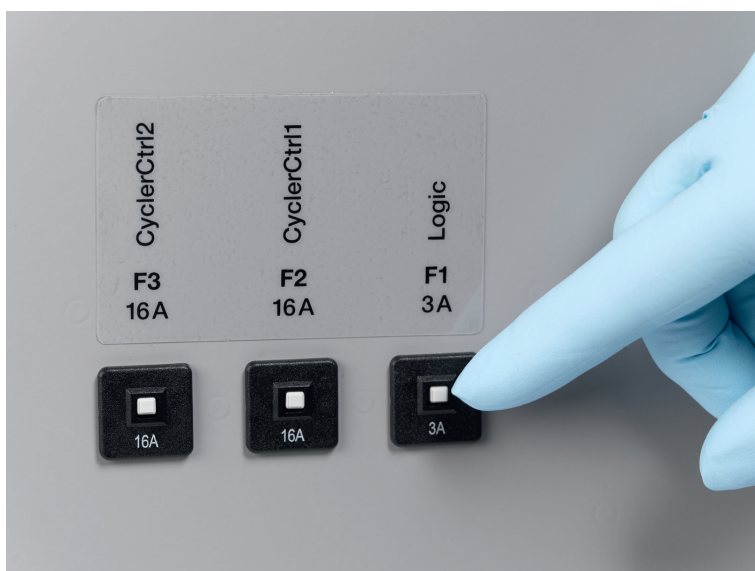

Figure 185: Circuit breakers

D

---

## Electrical fuses

These fuses must be exchanged by the operator when they are blown. The LightCycler® 96 System Package includes a pack of replacement fuses.

- 
- 1 Disconnect the instrument.
  - 2 Remove the fuse holder from its fuse chamber.
- 

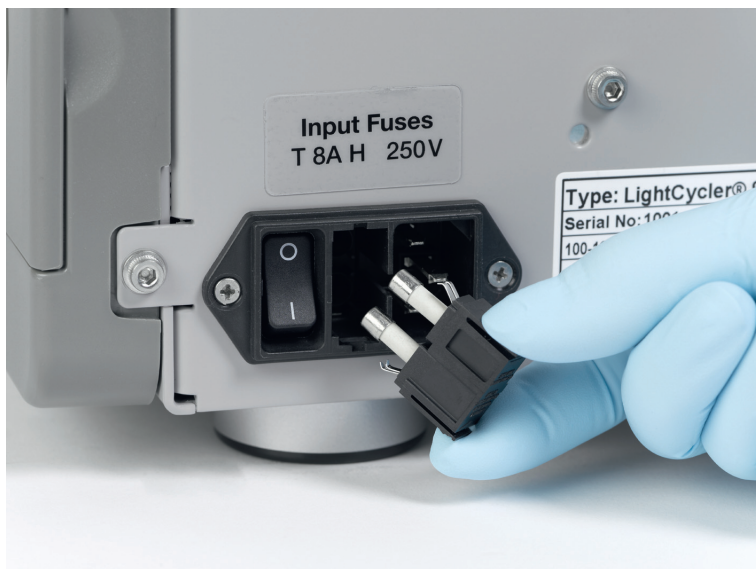

- 
- 3 Exchange the blown fuse with a replacement fuse.
  - 4 Place the fuse holder back in the chamber.
- 

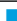

D

## 6 Packing the instrument for shipping

To prepare the LightCycler® 96 Instrument for transportation:

- ▶ Place the transport locking device. For detailed information, see the following sections:
  - ▶ *Placing the transport locking device, if the instrument initializes*, below.
  - ▶ *Placing the transport locking failure state foam, if the instrument does not initialize*, on page 289.
- ▶ Pack the instrument. For detailed information, see section *Packing the instrument*, on page 290.

### 6.1 Placing the transport locking device, if the instrument initializes

If the LightCycler® 96 Instrument initializes correctly, proceed as follows:

- 1 Once the instrument has been successfully initialized, choose the *Eject* button on the touchscreen to release the loading module.

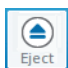

The loading module is ejected.

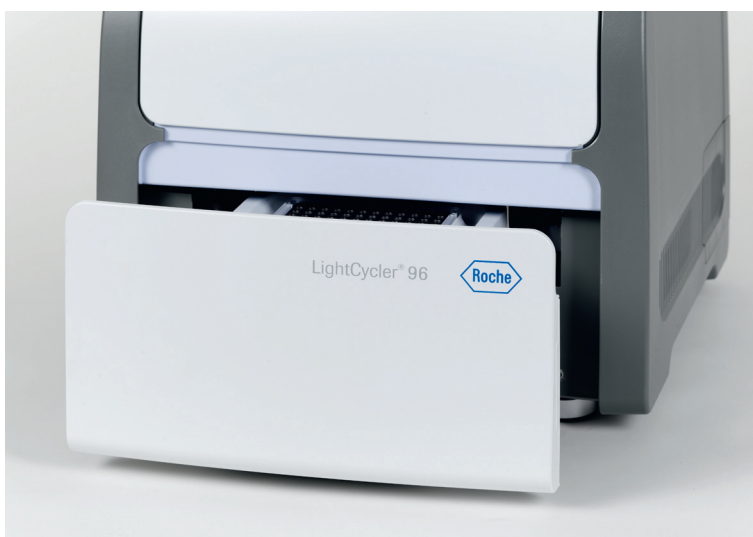

- 2 Manually pull the loading module completely out of the instrument.
- 3 Place the transport locking device onto the mount.

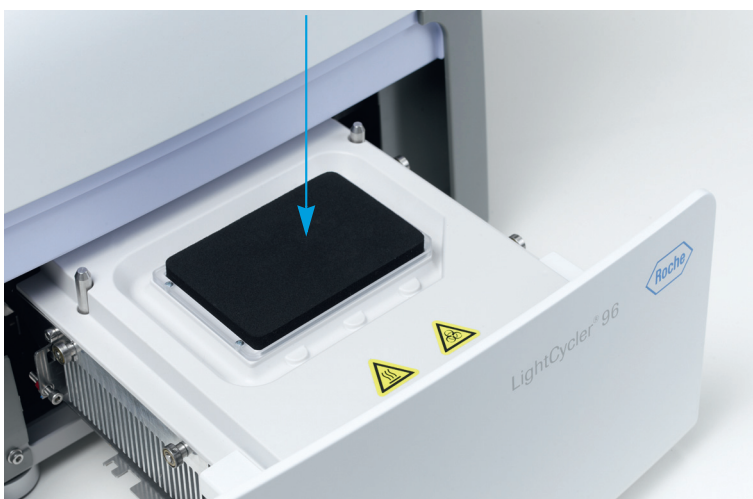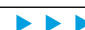

- 4 Push the loading module back.
- 5 On the touchscreen, open the *Utilities* tab and then the *Service* tab.

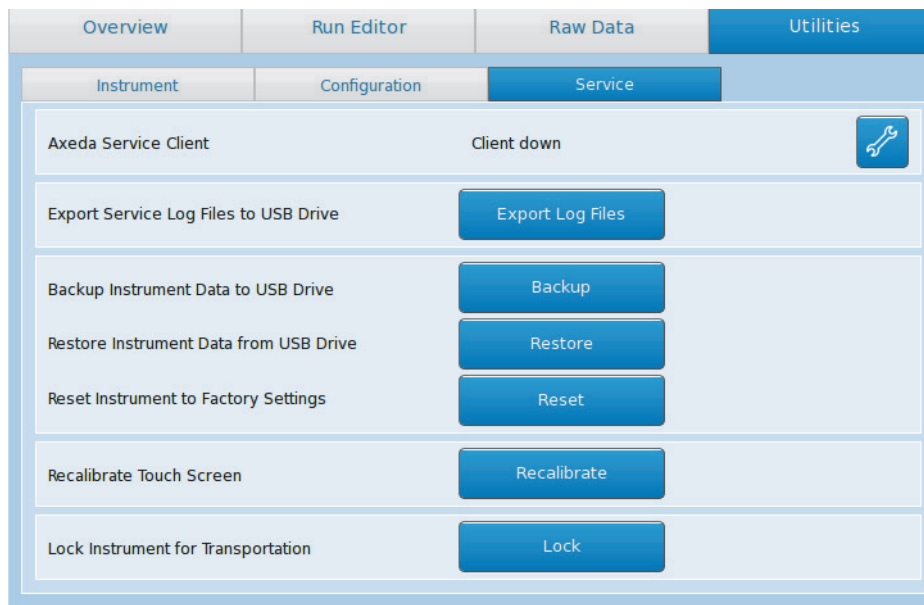

- 6 Choose the *Lock* button next to *Lock Instrument for Transportation*.
- 7 You are prompted to confirm that the transport locking device is inserted.  
Choose *Ok*.  
 *The instrument will be set to transport condition. This will take up to 5 minutes.*
- 8 Switch off the instrument once you are requested to do so.

D

## 6.2 Placing the transport locking failure state foam, if the instrument does not initialize

If the LightCycler® 96 Instrument fails to initialize, proceed as follows:

- 1 Switch off the instrument.
- 2 Manually pull the loading module completely out of the instrument.
- 3 Place the transport locking failure state foam onto the mount.

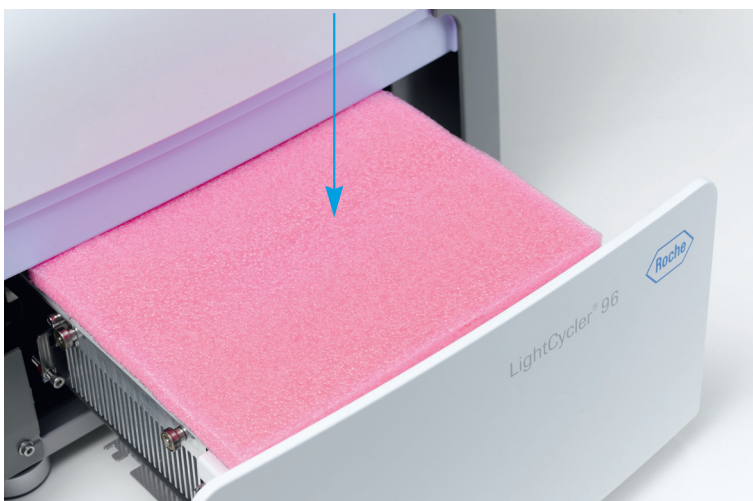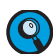

You can request the transport locking failure state foam from your local Roche Diagnostics representative.

- 4 Push the loading module back.

# D

## 6.3 Packing the instrument

To pack the instrument, ensure that you have placed the transport locking device or the transport locking failure state foam.

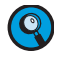

*Use the Roche shipping box with the protective foam parts. If you have already disposed of the box or your box looks different from the one described below (LightCycler® 96 Instrument Version 1.0), you can request it from your local Roche Diagnostics representative.*

1

Unplug the mains power cable.

2

Fully tighten the fixation gripper on the back of the instrument. Turn the screw clockwise.

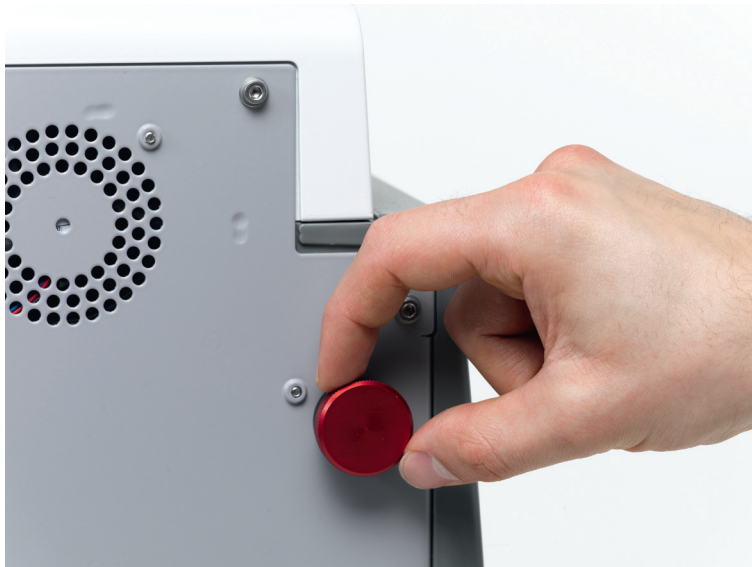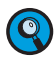

*The fixation gripper is a new device that was introduced for transport protection reasons. It is not present in older hardware versions. If the gripper is not available, proceed with the next step.*

3

Place the bottom part of the box on a solid leveled surface and insert the biggest foam part at the bottom.

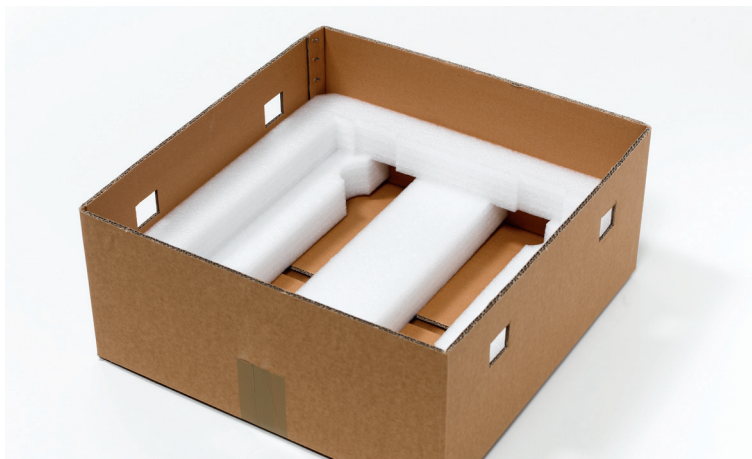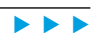

D

- 4 Lift the LightCycler® 96 Instrument by holding it on the left and right sides and place it inside the box.

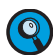

*To carry and lift the instrument, only use the recessed grips on the left and right sides of the instrument base plate.*

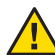

**Caution:**

*Due to the weight of the instrument, two persons may be needed to lift it.*

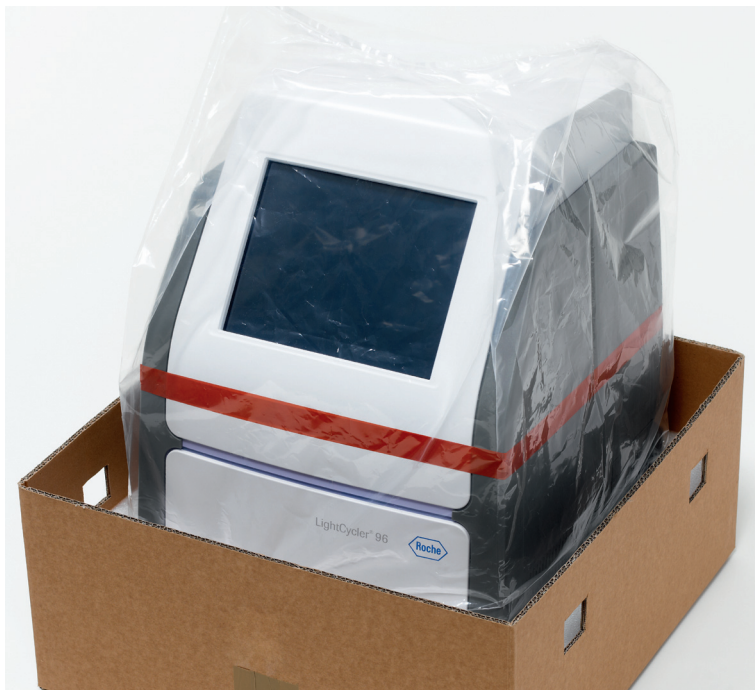

- 5 Place the remaining foam parts on top of the instrument.

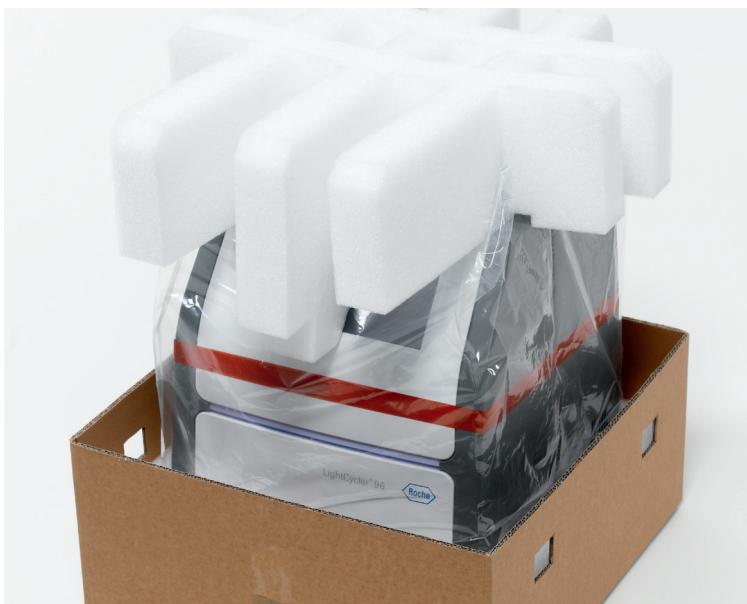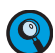

*There is no need to send any accessory or accessory box with the instrument.*

- 6 Cover the instrument with the top of the box.

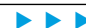

# D

- 7 Use the plastic clamping pieces to fasten the box top onto the box bottom.

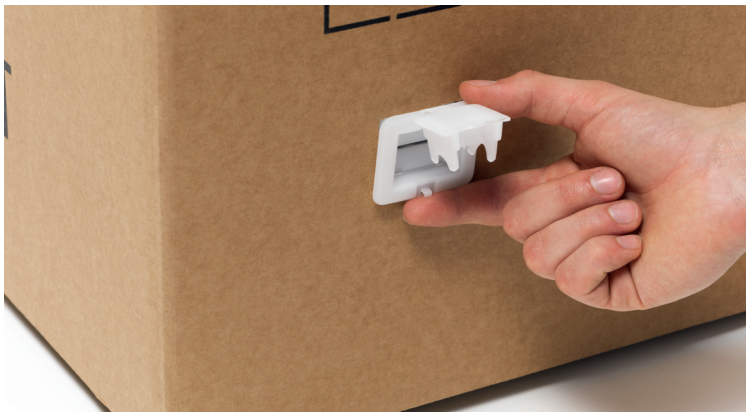

D

# **Chapter E**

## **Troubleshooting**

*E*

|          |                                         |            |
|----------|-----------------------------------------|------------|
| <b>E</b> | <b>Troubleshooting</b>                  | <b>293</b> |
| <b>1</b> | <b>System messages and errors .....</b> | <b>295</b> |
| <b>2</b> | <b>Remote service .....</b>             | <b>304</b> |

E

# Troubleshooting

This chapter provides the messages from the LightCycler® 96 Instrument together with possible causes and corrective actions. It also describes how to use the remote service of the LightCycler® 96 Instrument Software.

## 1 System messages and errors

The messages and errors which may potentially occur on the LightCycler® 96 Instrument are listed in the tables below. For each message, the probable cause and corrective action typically required for solving the problem are shown. Contact your local Roche Diagnostics representative for troubleshooting assistance.

 *When an error occurs, always export the instrument log files to a USB drive and keep the data ready for the Roche field service engineer. For detailed information on exporting the log files, see section [Export Service Log Files to USB Drive](#), on page 266.*

*Data obtained from a run where a system message appeared should be evaluated carefully. If the validity of the results is doubtful, repeat the run.*

The LightCycler® 96 Instrument Software issues the following message types:

- ▶ Information to support the operator. These messages are not displayed in the message window area and need not to be confirmed. They are only written to the log file for later analysis.
- ▶ Warnings which do not stop the task completing. The system may continue working, but not with full performance, or may run into problems later.
- ▶ Errors which stop the task completing. The system will stop performing some actions if the operator does not intervene.

Warnings and errors are displayed in the message area of the status bar. For detailed information on displaying and confirming messages, see section [Alarms and messages](#), on page 272.

| Error code | Module  | Type  | Message text                                                     | Corrective action                                                                                                                                                 |
|------------|---------|-------|------------------------------------------------------------------|-------------------------------------------------------------------------------------------------------------------------------------------------------------------|
| 17100256   | SMStage | Error | Parameters out of range.                                         | <ul style="list-style-type: none"> <li>▶ Restart the instrument.</li> <li>▶ If the error persists, inform your local Roche Diagnostics representative.</li> </ul> |
| 17100272   | SMStage | Error | The port is not mapped on the specified device.                  | <ul style="list-style-type: none"> <li>▶ Restart the instrument.</li> <li>▶ If the error persists, inform your local Roche Diagnostics representative.</li> </ul> |
| 17100512   | SMStage | Error | The specified port is already created.                           | <ul style="list-style-type: none"> <li>▶ Restart the instrument.</li> <li>▶ If the error persists, inform your local Roche Diagnostics representative.</li> </ul> |
| 17100513   | SMStage | Error | The command can't be performed because the port was not created. | <ul style="list-style-type: none"> <li>▶ Restart the instrument.</li> <li>▶ If the error persists, inform your local Roche Diagnostics representative.</li> </ul> |
| 17100514   | SMStage | Error | The specified input port is used.                                | <ul style="list-style-type: none"> <li>▶ Restart the instrument.</li> <li>▶ If the error persists, inform your local Roche Diagnostics representative.</li> </ul> |

*E*

| Error code | Module            | Type    | Message text                                                                                   | Corrective action                                                                                                                                                                                                                                                                                                                                                          |
|------------|-------------------|---------|------------------------------------------------------------------------------------------------|----------------------------------------------------------------------------------------------------------------------------------------------------------------------------------------------------------------------------------------------------------------------------------------------------------------------------------------------------------------------------|
| 17100545   | SMStage           | Error   | The command can't be performed, because the SM is not initialized.                             | <ul style="list-style-type: none"> <li>▶ Restart the instrument.</li> <li>▶ If the error persists, inform your local Roche Diagnostics representative.</li> </ul>                                                                                                                                                                                                          |
| 17100549   | SMStage           | Error   | Maximum number of steps reached while initializing.                                            | <ul style="list-style-type: none"> <li>▶ Restart the instrument.</li> <li>▶ Tighten the hexagon socket screw (turn clockwise) on the back of the instrument; see section <a href="#">Unlocking the loading module</a>, on page 281.</li> <li>▶ If the error persists, inform your local Roche Diagnostics representative.</li> </ul>                                       |
| 17100551   | SMStage           | Error   | Initposition is out of range.                                                                  | <ul style="list-style-type: none"> <li>▶ Restart the instrument.</li> <li>▶ If the error persists, inform your local Roche Diagnostics representative.</li> </ul>                                                                                                                                                                                                          |
| 25300003   | Analytical Cyclor | Warning | Cycles can only be added during measurement.                                                   | <ul style="list-style-type: none"> <li>▶ Restart the instrument.</li> <li>▶ If the error persists, inform your local Roche Diagnostics representative.</li> </ul>                                                                                                                                                                                                          |
| 25300004   | Analytical Cyclor | Warning | LED intensity <name> <sup>1</sup> for filter <name> is too low! Minimum is <nr> <sup>2</sup> . | <ul style="list-style-type: none"> <li>▶ Restart the instrument.</li> <li>▶ If the error persists, inform your local Roche Diagnostics representative.</li> </ul>                                                                                                                                                                                                          |
| 25300005   | Analytical Cyclor | Warning | Measurement time expired!                                                                      | <ul style="list-style-type: none"> <li>▶ Restart the instrument.</li> <li>▶ If the error persists, inform your local Roche Diagnostics representative.</li> </ul>                                                                                                                                                                                                          |
| 25300008   | Analytical Cyclor | Warning | Dynamic integration time for filter <name> <sup>1</sup> limited to <nr> <sup>2</sup> ms.       | <ul style="list-style-type: none"> <li>▶ Restart the instrument.</li> <li>▶ If the error persists, inform your local Roche Diagnostics representative.</li> </ul>                                                                                                                                                                                                          |
| 253000014  | Analytical Cyclor | Error   | Module state change <name> <sup>1</sup> => <name> <sup>1</sup> failed!                         | <ul style="list-style-type: none"> <li>▶ Restart the instrument.</li> <li>▶ If the error persists, inform your local Roche Diagnostics representative.</li> </ul>                                                                                                                                                                                                          |
| 253000017  | Analytical Cyclor | Error   | Cover drive is open or in maintenance mode!                                                    | <ul style="list-style-type: none"> <li>▶ Restart the instrument.</li> <li>▶ If the maintenance mode is activated, tighten the hexagon socket screw (turn clockwise) on the back of the instrument; see section <a href="#">Unlocking the loading module</a>, on page 281.</li> <li>▶ If the error persists, inform your local Roche Diagnostics representative.</li> </ul> |
| 253000018  | Analytical Cyclor | Error   | Cover drive open command ignored as current cover state is <name> <sup>1</sup> !               | <ul style="list-style-type: none"> <li>▶ Restart the instrument.</li> <li>▶ If the error persists, inform your local Roche Diagnostics representative.</li> </ul>                                                                                                                                                                                                          |

E

| Error code | Module         | Type  | Message text                                                            | Corrective action                                                                                                                                                                                                                                                                                                                                                                  |
|------------|----------------|-------|-------------------------------------------------------------------------|------------------------------------------------------------------------------------------------------------------------------------------------------------------------------------------------------------------------------------------------------------------------------------------------------------------------------------------------------------------------------------|
| 25700009   | CoverDrive     | Error | Screw on the back was released.                                         | The operator can unlock the loading module using the hexagon socket screw on the back of the instrument. In this case the loading module cannot be driven by the motor; see section <a href="#">Unlocking the loading module</a> , on page 281.                                                                                                                                    |
| 25700010   | CoverDrive     | Error | Cover drive over press with <nr> <sup>2</sup> steps.                    | <ul style="list-style-type: none"> <li>▶ Restart the instrument.</li> <li>▶ If the error persists, inform your local Roche Diagnostics representative.</li> </ul>                                                                                                                                                                                                                  |
| 25700014   | CoverDrive     | Error | Reading motor resistance failed!                                        | <ul style="list-style-type: none"> <li>▶ Restart the instrument.</li> <li>▶ If the error persists, inform your local Roche Diagnostics representative.</li> </ul>                                                                                                                                                                                                                  |
| 26400272   | Optics Control | Error | LED temperature is too high.                                            | <ul style="list-style-type: none"> <li>▶ Switch off the instrument and cool it down.</li> <li>▶ Check whether the room temperature is within the specification; see section <a href="#">Environmental parameters</a>, on page 25.</li> <li>▶ If the error persists, inform your local Roche representative.</li> </ul>                                                             |
| 26400273   | Optics Control | Error | LED temperature measuring not possible because of NTC circuit overload. | <ul style="list-style-type: none"> <li>▶ Restart the instrument.</li> <li>▶ If the error persists, inform your local Roche Diagnostics representative.</li> </ul>                                                                                                                                                                                                                  |
| 26400300   | Optics Control | Error | PCB Optics Control Read/Write Error.                                    | <ul style="list-style-type: none"> <li>▶ Restart the instrument.</li> <li>▶ Export the log files; see section <a href="#">Lock Instrument for Transportation</a>, on page 271.</li> <li>▶ Perform a reset to factory settings; see section <a href="#">Backup/Restore/Reset</a>, on page 267.</li> <li>▶ If the error persists, inform your local Roche representative.</li> </ul> |
| 26400301   | Optics Control | Error | Photometer has unknown datastructure.                                   | <ul style="list-style-type: none"> <li>▶ Restart the instrument.</li> <li>▶ Export the log files; see section <a href="#">Lock Instrument for Transportation</a>, on page 271.</li> <li>▶ Perform a reset to factory settings; see section <a href="#">Backup/Restore/Reset</a>, on page 267.</li> <li>▶ If the error persists, inform your local Roche representative.</li> </ul> |
| 26400302   | Optics Control | Error | Error while comparing checksum of PCB Optics Control.                   | <ul style="list-style-type: none"> <li>▶ Restart the instrument.</li> <li>▶ Export the log files; see section <a href="#">Lock Instrument for Transportation</a>, on page 271.</li> <li>▶ Perform a reset to factory settings; see section <a href="#">Backup/Restore/Reset</a>, on page 267.</li> <li>▶ If the error persists, inform your local Roche representative.</li> </ul> |

E

| Error code | Module              | Type  | Message text                                             | Corrective action                                                                                                                                                                         |
|------------|---------------------|-------|----------------------------------------------------------|-------------------------------------------------------------------------------------------------------------------------------------------------------------------------------------------|
| 26400310   | Optics Control      | Error | Timeout while controlling Thermocycler.                  | <ul style="list-style-type: none"> <li>▶ Restart the instrument.</li> <li>▶ If the error persists, inform your local Roche Diagnostics representative.</li> </ul>                         |
| 26400311   | Optics Control      | Error | Error during communication with Thermocycler (CSM).      | <ul style="list-style-type: none"> <li>▶ Restart the instrument.</li> <li>▶ If the error persists, inform your local Roche Diagnostics representative.</li> </ul>                         |
| 26400312   | Optics Control      | Error | Error during communication with Thermocycler (FWR).      | <ul style="list-style-type: none"> <li>▶ Restart the instrument.</li> <li>▶ If the error persists, inform your local Roche Diagnostics representative.</li> </ul>                         |
| 26500001   | Message Broker      | Error | Hardware error received from firmware.                   | <ul style="list-style-type: none"> <li>▶ Restart the instrument.</li> <li>▶ If the error persists, inform your local Roche Diagnostics representative.</li> </ul>                         |
| 26500002   | Message Broker      | Error | Transit error information to parent module.              | <ul style="list-style-type: none"> <li>▶ Restart the instrument.</li> <li>▶ If the error persists, inform your local Roche Diagnostics representative.</li> </ul>                         |
| 26500004   | Message Broker      | Error | Procedure could not be executed - csm is in wrong state. | <ul style="list-style-type: none"> <li>▶ Restart the instrument.</li> <li>▶ If the error persists, inform your local Roche Diagnostics representative.</li> </ul>                         |
| 26500005   | Message Broker      | Error | Unhandled error.                                         | <ul style="list-style-type: none"> <li>▶ Restart the instrument.</li> <li>▶ If the error persists, inform your local Roche Diagnostics representative.</li> </ul>                         |
| 26500006   | Message Broker      | Error | Generic error sent by a csm.                             | <ul style="list-style-type: none"> <li>▶ Restart the instrument.</li> <li>▶ If the error persists, inform your local Roche Diagnostics representative.</li> </ul>                         |
| 29200769   | Block cycler        | Error | Cover heater temperature out of range                    | <ul style="list-style-type: none"> <li>▶ Reload the LightCycler® 96 Instrument Software.</li> <li>▶ If the error persists, inform your local Roche Diagnostics representative.</li> </ul> |
| 29200770   | Block cycler        | Error | Cover control sensor defective/out of range              | <ul style="list-style-type: none"> <li>▶ Reload the LightCycler® 96 Instrument Software.</li> <li>▶ If the error persists, inform your local Roche Diagnostics representative.</li> </ul> |
| 40400007   | Instrument software | Error | Error saving lc96 file to <name> <sup>1</sup> .          | Inform your local Roche Diagnostics representative.                                                                                                                                       |
| 40400011   | Instrument software | Error | File could not be removed: <name> <sup>1</sup> .         | Inform your local Roche Diagnostics representative.                                                                                                                                       |

E

| Error code | Module              | Type  | Message text                                                               | Corrective action                                                                                                                                                                                |
|------------|---------------------|-------|----------------------------------------------------------------------------|--------------------------------------------------------------------------------------------------------------------------------------------------------------------------------------------------|
| 40400012   | Instrument software | Error | File could not be opened: <name> <sup>1</sup> .                            | <ul style="list-style-type: none"> <li>▶ Open the experiment with the LightCycler<sup>®</sup> 96 Application Software.</li> <li>▶ Inform your local Roche Diagnostics representative.</li> </ul> |
| 40400015   | Instrument software | Error | Could not create temporary directory <name> <sup>1</sup> .                 | Inform your local Roche Diagnostics representative.                                                                                                                                              |
| 40400016   | Instrument software | Error | Error unzipping: <name> <sup>1</sup> .                                     | Inform your local Roche Diagnostics representative.                                                                                                                                              |
| 40400017   | Instrument software | Error | Cannot open lc96 main xml file: <name> <sup>1</sup> .                      | Inform your local Roche Diagnostics representative.                                                                                                                                              |
| 40400018   | Instrument software | Error | Cannot read lc96 from main xml file as dom document: <name> <sup>1</sup> . | Inform your local Roche representative.                                                                                                                                                          |
| 40400019   | Instrument software | Error | Cannot open lc96 extension file: <name> <sup>1</sup> .                     | Inform your local Roche Diagnostics representative.                                                                                                                                              |
| 40400020   | Instrument software | Error | Cannot read lc96 extension as dom document: <name> <sup>1</sup> .          | Inform your local Roche Diagnostics representative.                                                                                                                                              |
| 40400021   | Instrument software | Error | Cannot open experiment <name> <sup>1</sup> .                               | <ul style="list-style-type: none"> <li>▶ Restart the instrument.</li> <li>▶ If the error persists, inform your local Roche Diagnostics representative.</li> </ul>                                |
| 40400024   | Instrument software | Error | Error deleting temporary file for clean overwrite: <name> <sup>1</sup> .   | Inform your local Roche Diagnostics representative.                                                                                                                                              |
| 40400026   | Instrument software | Error | Could not create archive: <name> <sup>1</sup> .                            | Inform your local Roche Diagnostics representative.                                                                                                                                              |
| 40400051   | Instrument software | Error | Error while creating new experiment <name> <sup>1</sup> .                  | Inform your local Roche Diagnostics representative.                                                                                                                                              |
| 40400052   | Instrument software | Error | Error while copying <name> <sup>1</sup> .                                  | <ul style="list-style-type: none"> <li>▶ Create a new experiment.</li> <li>▶ Inform your local Roche Diagnostics representative.</li> </ul>                                                      |
| 40400058   | Instrument software | Error | Could not create experiments folder <name> <sup>1</sup> on device.         | <ul style="list-style-type: none"> <li>▶ Use a different USB drive.</li> <li>▶ If the error persists, inform your local Roche Diagnostics representative.</li> </ul>                             |
| 40400059   | Instrument software | Error | Error opening drawer...                                                    | <ul style="list-style-type: none"> <li>▶ Restart the instrument.</li> <li>▶ If the error persists, inform your local Roche Diagnostics representative.</li> </ul>                                |
| 40400060   | Instrument software | Error | Error aborting experiment...                                               | Inform your local Roche Diagnostics representative.                                                                                                                                              |
| 40400061   | Instrument software | Error | Instrument could not start experiment.                                     | Inform your local Roche Diagnostics representative.                                                                                                                                              |
| 40400063   | Instrument software | Error | No experiment selected to load...                                          | Select an experiment to be loaded.                                                                                                                                                               |
| 40400065   | Instrument software | Error | Error while saving experiment <name> <sup>1</sup> .                        | Inform your local Roche Diagnostics representative.                                                                                                                                              |

E

| Error code | Module              | Type    | Message text                                                                                  | Corrective action                                                                                                                                                                                                                                                                              |
|------------|---------------------|---------|-----------------------------------------------------------------------------------------------|------------------------------------------------------------------------------------------------------------------------------------------------------------------------------------------------------------------------------------------------------------------------------------------------|
| 40400066   | Instrument software | Error   | Error while adding 10 cycles to current loaded experiment...                                  | Inform your local Roche Diagnostics representative.                                                                                                                                                                                                                                            |
| 40400067   | Instrument software | Error   | Error while adding 10 cycles to current loaded experiment...                                  | Inform your local Roche Diagnostics representative.                                                                                                                                                                                                                                            |
| 40400070   | Instrument software | Error   | Instrument could not execute experiment: <name> <sup>1</sup> .                                | Inform your local Roche Diagnostics representative.                                                                                                                                                                                                                                            |
| 40400071   | Instrument software | Error   | Could not save experiment to xml: <name> <sup>1</sup> .                                       | Inform your local Roche Diagnostics representative.                                                                                                                                                                                                                                            |
| 40400072   | Instrument software | Error   | Instrument could not abort current experiment.                                                | Inform your local Roche Diagnostics representative.                                                                                                                                                                                                                                            |
| 40400073   | Instrument software | Error   | Instrument could not open drawer.                                                             | <ul style="list-style-type: none"> <li>▶ Check that the loading unit is not locked; see section <a href="#">Unlocking the loading module</a>, on page 281.</li> <li>▶ Restart the instrument.</li> <li>▶ If the error persists, inform your local Roche Diagnostics representative.</li> </ul> |
| 40400074   | Instrument software | Error   | Error while adding 10 cycles to current loaded experiment.                                    | Inform your local Roche Diagnostics representative.                                                                                                                                                                                                                                            |
| 40400078   | Instrument software | Error   | Predefined programs file doesn't exist: <name> <sup>1</sup> .                                 | Inform your local Roche Diagnostics representative.                                                                                                                                                                                                                                            |
| 40400079   | Instrument software | Error   | Cannot open Predefined programs file: <name> <sup>1</sup> .                                   | Inform your local Roche Diagnostics representative.                                                                                                                                                                                                                                            |
| 40400080   | Instrument software | Error   | Cannot read Predefined programs as dom document: <name> <sup>1</sup> .                        | Inform your local Roche Diagnostics representative.                                                                                                                                                                                                                                            |
| 40400086   | Instrument software | Warning | Failed to start remote monitoring server:                                                     | <ul style="list-style-type: none"> <li>▶ Check the network connection.</li> <li>▶ Call your local Roche representative.</li> </ul>                                                                                                                                                             |
| 40400093   | Instrument software | Warning | Unable to start processed experiment. Experiment has to be unprocessed: <name> <sup>1</sup> . | Use a non-executed experiment.                                                                                                                                                                                                                                                                 |
| 40400094   | Instrument software | Warning | Experiment <name> <sup>1</sup> has no planned measurements.                                   | Check the experiment settings.                                                                                                                                                                                                                                                                 |
| 40400095   | Instrument software | Warning | Unable to start experiment without programs: <name> <sup>1</sup> .                            | Check the experiment settings.                                                                                                                                                                                                                                                                 |
| 40400096   | Instrument software | Warning | Unable to start experiment without channels: <name> <sup>1</sup> .                            | Check the experiment settings.                                                                                                                                                                                                                                                                 |
| 40400097   | Instrument software | Warning | Unable to start experiment <name> <sup>1</sup> with empty programs.                           | Check the experiment settings.                                                                                                                                                                                                                                                                 |

E

| Error code | Module              | Type    | Message text                                                                                                                 | Corrective action                                                                                                                                                                                                                                                                                                               |
|------------|---------------------|---------|------------------------------------------------------------------------------------------------------------------------------|---------------------------------------------------------------------------------------------------------------------------------------------------------------------------------------------------------------------------------------------------------------------------------------------------------------------------------|
| 40400100   | Instrument software | Error   | Error while sending mail: <name> <sup>1</sup> .                                                                              | <ul style="list-style-type: none"> <li>▶ Try again.</li> <li>▶ Check the network connections; see section <a href="#">Network Information</a>, on page 257.</li> <li>▶ Check the email configuration; see section <a href="#">Email Information</a>, on page 259.</li> <li>▶ Inform your local Roche representative.</li> </ul> |
| 40400106   | Instrument software | Error   | Cannot create new experiment '%1' since it already exists.                                                                   | Use different experiment name.                                                                                                                                                                                                                                                                                                  |
| 40400107   | Instrument software | Error   | Error while creating new experiment.                                                                                         | <ul style="list-style-type: none"> <li>▶ Restart the instrument.</li> <li>▶ If the error persists, inform your local Roche Diagnostics representative.</li> </ul>                                                                                                                                                               |
| 40400110   | Instrument software | Error   | Error while adding 10 additional cycles to experiment <name> <sup>1</sup> .                                                  | Inform your local Roche Diagnostics representative.                                                                                                                                                                                                                                                                             |
| 40400111   | Instrument software | Warning | Error while saving experiment <name> <sup>1</sup> to USB device.                                                             | <ul style="list-style-type: none"> <li>▶ Try again.</li> <li>▶ Use another USB drive.</li> </ul>                                                                                                                                                                                                                                |
| 40400114   | Instrument software | Error   | Saving experiment <name> <sup>1</sup> to USB device failed and could not be recovered.                                       | <ul style="list-style-type: none"> <li>▶ Try again.</li> <li>▶ Use another USB drive.</li> </ul>                                                                                                                                                                                                                                |
| 40400120   | Instrument software | Error   | Hardware error occurred. Operation Aborted.                                                                                  | <ul style="list-style-type: none"> <li>▶ Restart the instrument.</li> <li>▶ If the error persists, inform your local Roche Diagnostics representative.</li> </ul>                                                                                                                                                               |
| 40400122   | Instrument software | Error   | Illegal ramp rate detected in program <nr> <sup>2</sup> at step <nr> <sup>2</sup> . Ramp rate was set to <nr> <sup>2</sup> . | <ul style="list-style-type: none"> <li>▶ Check the experiment definition.</li> <li>▶ If the error persists, inform your local Roche Diagnostics representative.</li> </ul>                                                                                                                                                      |
| 40400128   | Instrument software | Warning | Experiment validation for experiment <name> <sup>1</sup> failed. Please check experiment before starting again               | <ul style="list-style-type: none"> <li>▶ Check the experiment definition.</li> <li>▶ If the error persists, inform your local Roche Diagnostics representative.</li> </ul>                                                                                                                                                      |
| 40400131   | Instrument software | Error   | Error exporting logfiles. Maybe usb device is full or has wrong permissions.                                                 | <ul style="list-style-type: none"> <li>▶ Try again.</li> <li>▶ Check the USB drive status for permissions and free disc space.</li> <li>▶ Use another USB drive.</li> </ul>                                                                                                                                                     |
| 40400133   | Instrument software | Error   | Error exporting system backup. Maybe usb device is full or has wrong permission.                                             | <ul style="list-style-type: none"> <li>▶ Try again.</li> <li>▶ Check the USB drive status for permissions and free disc space.</li> <li>▶ Use another USB drive.</li> </ul>                                                                                                                                                     |

E

| Error code | Module              | Type    | Message text                                                                                                            | Corrective action                                                                                                                                                                                                                                                                                                                            |
|------------|---------------------|---------|-------------------------------------------------------------------------------------------------------------------------|----------------------------------------------------------------------------------------------------------------------------------------------------------------------------------------------------------------------------------------------------------------------------------------------------------------------------------------------|
| 40400144   | Instrument software | Error   | Parsing failed for experiment: <name> <sup>1</sup> . Experiment will not be loaded.                                     | Please delete the experiment.                                                                                                                                                                                                                                                                                                                |
| 40400145   | Instrument software | Error   | Could not copy experiment <name> <sup>1</sup> to storage location <name> <sup>1</sup> .                                 | <ul style="list-style-type: none"> <li>▶ Try again.</li> <li>▶ Check the USB drive status for permissions and free disc space.</li> <li>▶ If the error persists, inform your local Roche Diagnostics representative.</li> </ul>                                                                                                              |
| 40400147   | Instrument software | Error   | Error removing faulty file <name> <sup>1</sup> .                                                                        | <ul style="list-style-type: none"> <li>▶ Restart the instrument.</li> <li>▶ Try again.</li> <li>▶ If the error persists, inform your local Roche Diagnostics representative.</li> </ul>                                                                                                                                                      |
| 40400167   | Instrument software | Error   | Failed to write file <name> <sup>1</sup> .                                                                              | Inform your local Roche Diagnostics representative.                                                                                                                                                                                                                                                                                          |
| 40400168   | Instrument software | Warning | Failed to automatically backup experiment.                                                                              | <ul style="list-style-type: none"> <li>▶ Check the automated backup configuration and network connection; see sections <a href="#">Automated Backup to Network Share</a>, on page 263 and <a href="#">Network Information</a>, on page 257.</li> <li>▶ If the error persists, inform your local Roche Diagnostics representative.</li> </ul> |
| 40400169   | Instrument software | Warning | Error while copying email attachment of experiment <name> <sup>1</sup> to temporary location.                           | <ul style="list-style-type: none"> <li>▶ Restart the instrument.</li> <li>▶ Try again.</li> <li>▶ If the error persists, inform your local Roche Diagnostics representative.</li> </ul>                                                                                                                                                      |
| 40400170   | Instrument software | Warning | There are more than <nr> <sup>2</sup> experiments in internal memory and USB drive. Some experiments will not be shown. | Remove experiments from the internal memory or the USB drive; see section <a href="#">Overview tab</a> , on page 237.                                                                                                                                                                                                                        |
| 40400171   | Instrument software | Error   | Software update can not be applied.                                                                                     | <ul style="list-style-type: none"> <li>▶ Ensure you have located the installation file on the top level of the USB drive.</li> <li>▶ If the error persists, inform your local Roche Diagnostics representative.</li> </ul>                                                                                                                   |
| 40400172   | Instrument software | Error   | Internal Connection Error.                                                                                              | <ul style="list-style-type: none"> <li>▶ Restart the instrument.</li> <li>▶ If the error persists, inform your local Roche Diagnostics representative.</li> </ul>                                                                                                                                                                            |
| 40400173   | Instrument software | Error   | Acquisition interval must be greater than 0.                                                                            | <ul style="list-style-type: none"> <li>▶ Check the acquisition interval; see section <a href="#">Measurement tab</a>, on page 242.</li> <li>▶ If the error persists, inform your local Roche Diagnostics representative.</li> </ul>                                                                                                          |

E

| Error code | Module              | Type  | Message text                    | Corrective action                                                                                                                                              |
|------------|---------------------|-------|---------------------------------|----------------------------------------------------------------------------------------------------------------------------------------------------------------|
| 40400174   | Instrument software | Error | Cannot handle pause or lidOpen. | <ul style="list-style-type: none"><li>▶ Restart the instrument.</li><li>▶ If the error persists, inform your local Roche Diagnostics representative.</li></ul> |

1. <name> here represents a placeholder for the name provided in the message on the LightCycler® 96 Instrument touchscreen.
2. <nr> here represents a placeholder for the number provided in the message on the LightCycler® 96 Instrument touchscreen.

*E*

## 2 Remote service

The LightCycler® 96 Instrument Software includes the Axeda client, which enables an operator to allow remote access by a Roche field service engineer via the Axeda web portal. The application provides a data export function to a shared export folder.

The Axeda client is preinstalled on the LightCycler® 96 Instrument, but has to be configured by a Roche field service engineer before it can be activated. The application is only active after the operator has manually started it. The operator can continue working without restrictions, even if the client is enabled.

The application provides secure connectivity to Roche only. It does not connect to any non-Roche systems.

### To configure the Axeda client

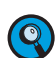

*The Axeda client should only be activated when this is requested by a Roche field service engineer.*

- 1 Switch on the instrument.
- 2 On the touchscreen, open the *Utilities* tab.
- 3 Open the *Service* tab.

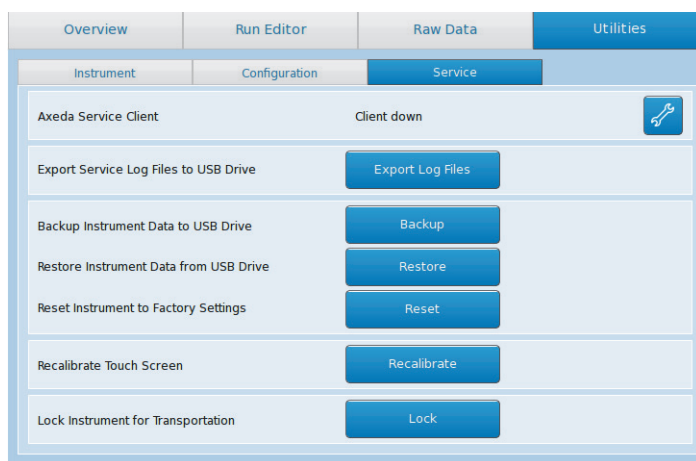

- 4 To activate the Axeda client, choose the tools button next to the *Axeda Service Client down* field. The *Axeda Client Configuration* window area opens.
- 5 Choose *Activate*.

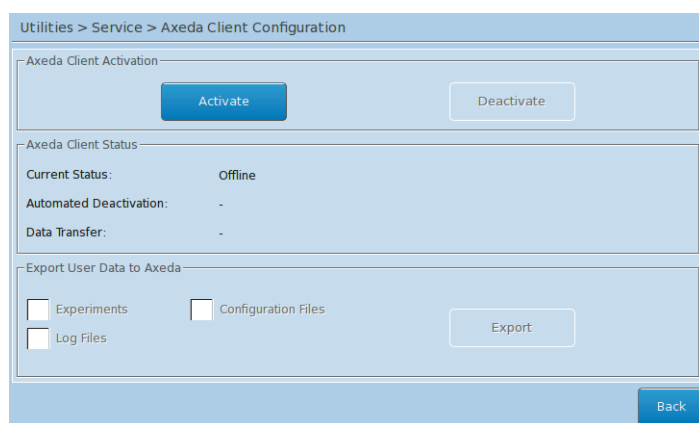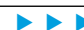

- 
- 6 Choose the data to be exported to the shared export folder.  
For detailed information on the configuration parameters, see section [Axeda Service Client](#), on page 264.
  - 7 To export the files to the shared export folder, choose *Export*.
  - 8 Choose *Back* to close the window area.
- 
- 

*E*

---

A large, stylized, light blue letter 'E' with a black outline, positioned on the left side of the page.

# Chapter F

## Appendix

*F*

|          |                                   |            |
|----------|-----------------------------------|------------|
| <b>F</b> | <b>Appendix</b>                   | <b>307</b> |
| <b>1</b> | <b>Ordering information</b> ..... | <b>309</b> |
| <b>2</b> | <b>Index</b> .....                | <b>310</b> |

F

# Appendix

## 1 Ordering information

Roche Applied Science provides a large selection of isolation reagents and systems for life science research. For a complete overview of related products and guides, please visit our Special Interest Site for Real-Time PCR Systems at [www.lightcycler96.com](http://www.lightcycler96.com).

*F*

## 2 Index

### Symbols

|              |          |
|--------------|----------|
| .lc96 .....  | 113      |
| .lc96p ..... | 113, 229 |
| .lc96u ..... | 113, 229 |
| .rdml .....  | 113      |

### Numerics

|                                    |          |
|------------------------------------|----------|
| 2 step amplification program ..... | 137, 246 |
| 3 step amplification program ..... | 137, 246 |

### A

|                                               |          |
|-----------------------------------------------|----------|
| Abort button .....                            | 225      |
| Abs Quant Settings dialog box .....           | 167      |
| Absolute quantification .....                 | 71, 166  |
| All Data tab .....                            | 171      |
| amplification curves .....                    | 169      |
| analysis settings .....                       | 167      |
| Cq bars .....                                 | 175      |
| Efficiency .....                              | 167      |
| heat map .....                                | 170      |
| Maximal Cq .....                              | 167, 188 |
| Minimal EPF .....                             | 168, 188 |
| Minimal Slope .....                           | 167, 188 |
| minimum EPF threshold .....                   | 169      |
| result table .....                            | 171      |
| standard curves .....                         | 174      |
| Statistic Data tab .....                      | 173      |
| AC .....                                      | 15       |
| Access to the instrument .....                | 43       |
| Acquisition Mode .....                        |          |
| application software .....                    | 139      |
| instrument software .....                     | 249      |
| Activate Transportation Lock dialog box ..... | 271      |
| Add 10 cycles .....                           | 251      |
| Add Analysis icon .....                       | 96       |
| Add Instrument dialog box .....               | 126      |
| Adding .....                                  |          |
| email address .....                           | 260      |
| instrument .....                              | 126      |
| positions .....                               | 101      |
| program, application software .....           | 136      |
| program, instrument software .....            | 246      |
| Alarm History .....                           | 273      |
| Alarms .....                                  | 272      |
| alarm history .....                           | 273      |
| Confirmed Alarms tab .....                    | 274      |
| confirming .....                              | 273, 275 |
| detailed information .....                    | 275      |
| displaying .....                              | 272      |
| icons .....                                   | 226      |
| Unconfirmed Alarms tab .....                  | 273      |
| All Data tab .....                            |          |
| absolute quantification .....                 | 171      |
| relative quantification .....                 | 182      |

### Amplification curves

|                               |          |
|-------------------------------|----------|
| absolute quantification ..... | 169      |
| endpoint fluorescence .....   | 70       |
| endpoint genotyping .....     | 195      |
| qualitative detection .....   | 189, 217 |
| Raw Data tab .....            | 161      |
| relative quantification ..... | 179      |
| Tm calling .....              | 206      |

### Analysis principles

|                               |    |
|-------------------------------|----|
| absolute quantification ..... | 71 |
| color compensation .....      | 68 |
| endpoint genotyping .....     | 78 |
| high resolution melting ..... | 81 |
| qualitative detection .....   | 77 |
| quantification .....          | 68 |
| relative quantification ..... | 72 |
| Tm calling .....              | 79 |

### Analysis Settings icon

|                              |    |
|------------------------------|----|
| Analysis Settings icon ..... | 96 |
|------------------------------|----|

### Analysis tab

|                               |     |
|-------------------------------|-----|
| absolute quantification ..... | 166 |
| creating analysis .....       | 164 |
| endpoint genotyping .....     | 193 |
| exporting results .....       | 218 |
| high resolution melting ..... | 207 |
| qualitative detection .....   | 186 |
| relative quantification ..... | 176 |
| sections .....                | 163 |
| shortcut menu .....           | 163 |
| Tm calling .....              | 200 |
| tool bar icons .....          | 163 |

### Area Marker icon

|                        |     |
|------------------------|-----|
| Area Marker icon ..... | 106 |
|------------------------|-----|

### Assembling the instrument

|                                 |    |
|---------------------------------|----|
| Assembling the instrument ..... | 44 |
|---------------------------------|----|

### Assign Group by Line Segment icon

|                                         |     |
|-----------------------------------------|-----|
| Assign Group by Line Segment icon ..... | 107 |
|-----------------------------------------|-----|

### AT/GC

|             |    |
|-------------|----|
| AT/GC ..... | 15 |
|-------------|----|

### Auto Standard Curve dialog box

|                                      |     |
|--------------------------------------|-----|
| Auto Standard Curve dialog box ..... | 151 |
|--------------------------------------|-----|

### Automated backup icon

|                             |     |
|-----------------------------|-----|
| Automated backup icon ..... | 223 |
|-----------------------------|-----|

### Automated Backup to Network Share window area

|                                                     |     |
|-----------------------------------------------------|-----|
| Automated Backup to Network Share window area ..... | 263 |
|-----------------------------------------------------|-----|

### Axeda client

|                    |          |
|--------------------|----------|
| Axeda client ..... | 265, 304 |
|--------------------|----------|

### Axeda Client Configuration window area

|                                              |          |
|----------------------------------------------|----------|
| Axeda Client Configuration window area ..... | 265, 304 |
|----------------------------------------------|----------|

### Axeda client icon

|                         |     |
|-------------------------|-----|
| Axeda client icon ..... | 223 |
|-------------------------|-----|

### B

### Backup Instrument Data window area

|                                          |     |
|------------------------------------------|-----|
| Backup Instrument Data window area ..... | 267 |
|------------------------------------------|-----|

### Block cycler cover

|                          |    |
|--------------------------|----|
| Block cycler cover ..... | 33 |
|--------------------------|----|

### Block cycler unit

|                         |    |
|-------------------------|----|
| Block cycler unit ..... | 33 |
|-------------------------|----|

### Bread crumb navigation

|                              |     |
|------------------------------|-----|
| Bread crumb navigation ..... | 224 |
|------------------------------|-----|

### Buttons

|                            |     |
|----------------------------|-----|
| application software ..... | 98  |
| instrument software .....  | 227 |

**C**

|                                  |          |
|----------------------------------|----------|
| Call                             |          |
| negative                         | 69       |
| positive                         | 69       |
| Cancel Zoom icon                 | 107      |
| CCD                              | 15       |
| CCD camera                       | 37       |
| Circuit breakers                 | 285      |
| Cleaning                         | 279      |
| accessories                      | 279      |
| instrument                       | 279      |
| instrument housing               | 279      |
| multiwell plate mount            | 280      |
| thermal block cyler              | 280      |
| touchscreen                      | 280      |
| Clear Wells                      | 153, 165 |
| Close Experiment icon            | 96       |
| Color compensation               | 68       |
| Column Selector dialog box       | 103      |
| Combined call heat map           | 77, 190  |
| Compatibility                    | 62       |
| Concentration                    | 146      |
| Condition                        | 146      |
| Configuration tab                | 256      |
| Automated Backup                 | 263      |
| Device Name/Hostname             | 257      |
| Email Information                | 259      |
| Network Information              | 257, 258 |
| Remote Monitoring                | 262      |
| Confirmed Alarms tab             | 274      |
| Confirming alarms                | 273, 275 |
| Cooling program                  | 137, 246 |
| Copying                          |          |
| experiment, application software | 114      |
| experiment, instrument software  | 231      |
| graphs                           | 108      |
| heat maps                        | 110      |
| sample data                      | 156      |
| tables                           | 101      |
| Correlation Coefficient          | 71       |
| Cq                               | 15, 69   |
| calculation                      | 69       |
| predefined fluorescence values   | 70       |
| Cq Bars                          |          |
| absolute quantification          | 175      |
| relative quantification          | 185      |
| Create New Analysis dialog box   | 164      |
| Creating                         |          |
| analysis                         | 164      |
| experiment, application software | 113      |
| experiment, instrument software  | 229      |
| replicate group                  | 147      |
| standard curves                  | 151      |
| Crossing point (Cp) see Cq       |          |
| CSV                              | 15       |
| Cy5                              | 15       |

**D**

|                                        |             |
|----------------------------------------|-------------|
| dsDNA                                  | 81          |
| Data Visualization dialog box          | 180         |
| Data Visualization icon                | 107         |
| Date/Time configuration window area    | 255         |
| Default directory                      | 134         |
| Delete Analysis icons                  | 96          |
| Deselecting                            |             |
| table items, application software      | 101         |
| table items, instrument software       | 228         |
| wells                                  | 111         |
| Detail Information window area         | 275         |
| Detection channels                     | 38          |
| Detection format                       | 64          |
| Integration Time, application software | 142         |
| Integration Time, instrument software  | 242, 244    |
| Melt Factor, application software      | 142         |
| Melt Factor, instrument software       | 242, 244    |
| Quant Factor, application software     | 142         |
| Quant Factor, instrument software      | 242, 244    |
| setting, application software          | 141         |
| setting, instrument software           | 243         |
| Detection Format dialog box            |             |
| application software                   | 141         |
| Detection Format window area           |             |
| instrument software                    | 243         |
| Detection unit                         | 35          |
| CCD camera                             | 37          |
| filter module                          | 36          |
| filter set                             | 26          |
| filter wheel                           | 36          |
| optic module                           | 35          |
| specifications                         | 26          |
| Device Name/Hostname window area       | 257         |
| DHCP                                   | 15, 55, 257 |
| Difference plot                        | 83, 215     |
| Dimensions of the instrument           | 43          |
| Displaying alarms                      | 272         |
| Disposables                            | 39          |
| LightCycler® 480 Multiwell Plate 96    | 39          |
| LightCycler® 480 Sealing Foil          | 39          |
| LightCycler® 8-Tube Strips             | 39          |
| DNS                                    | 15          |
| Drawer see Loading module              |             |
| dsDNA                                  | 15          |
| Duration                               |             |
| application software                   | 139         |
| instrument software                    | 249         |

**E**

|                                               |             |
|-----------------------------------------------|-------------|
| E .....                                       | 15          |
| Edit Instrument dialog box .....              | 126         |
| Editing .....                                 |             |
| input fields, application software .....      | 98          |
| input fields, instrument software .....       | 227         |
| table cells .....                             | 102         |
| Efficiency .....                              |             |
| absolute quantification .....                 | 167         |
| relative quantification .....                 | 177         |
| Eject button .....                            | 225         |
| Electrical fuses .....                        | 286         |
| Email address .....                           |             |
| experiment, application software .....        | 134         |
| experiment, instrument window area ..         | 259         |
| PDF email report .....                        | 260         |
| SMTP settings .....                           | 261         |
| Email Information window area .....           | 259         |
| Emission filter .....                         | 36, 38      |
| Endpoint fluorescence .....                   | 70          |
| Endpoint genotyping .....                     | 78, 193     |
| amplification curves .....                    | 195         |
| angles .....                                  | 194         |
| grouping samples .....                        | 78          |
| heat map .....                                | 198         |
| Pos./Neg. Threshold .....                     | 194         |
| result table .....                            | 199         |
| scatter plot .....                            | 78, 196     |
| settings .....                                | 194         |
| Endpoint Genotyping Settings dialog box ..... | 194         |
| Environmental requirements .....              | 25          |
| EPF .....                                     | 15, 70, 193 |
| Error bars .....                              | 181         |
| Error calculation .....                       | 75          |
| Error codes .....                             | 295         |
| Ethernet interface .....                      | 26, 31      |
| Ethernet network connection .....             | 55          |
| Ethernet network icon .....                   | 223         |
| Exchanging .....                              |             |
| electrical fuses .....                        | 286         |
| ventilation dust filter .....                 | 283         |
| Excitation filter .....                       | 36, 38      |
| Excluding samples .....                       | 101, 165    |
| Exit button .....                             | 225         |
| Exiting, application software .....           | 123         |

**Experiment**

|                                               |          |
|-----------------------------------------------|----------|
| copying, application software .....           | 114      |
| copying, instrument software .....            | 231      |
| creating, application software .....          | 113      |
| creating, instrument software .....           | 229      |
| default directory .....                       | 134      |
| detection formats, application software ..... | 141      |
| detection formats, instrument software .....  | 243      |
| email address .....                           | 134      |
| file types .....                              | 113, 229 |
| HTML report, application software .....       | 118      |
| notes .....                                   | 118      |
| open template, application software .....     | 114      |
| open template, instrument software .....      | 232      |
| opening, application software .....           | 115      |
| opening, instrument software .....            | 232      |
| processed files .....                         | 113, 229 |
| properties, application software .....        | 117      |
| receiving from instrument .....               | 128      |
| saving, application software .....            | 116      |
| saving, instrument software .....             | 233      |
| sending to instrument .....                   | 128, 129 |
| Summary tab .....                             | 117      |
| transferring .....                            | 128      |
| unprocessed files .....                       | 113, 229 |
| Experiment bar .....                          | 97       |
| Export data .....                             |          |
| application software .....                    | 122      |
| instrument software .....                     | 235      |
| Export Log Files window area .....            | 266      |
| Exporting .....                               |          |
| analysis results .....                        | 218      |
| graphs .....                                  | 108      |
| heat maps .....                               | 110      |
| log files .....                               | 266      |
| multiple result data .....                    | 133      |
| result table .....                            | 218      |
| results batch export .....                    | 131      |
| sample data .....                             | 156      |
| table data .....                              | 101      |
| External handheld barcode scanner .....       |          |
| specifications .....                          | 27       |
| USB interface .....                           | 31       |

**F**

|                                            |          |
|--------------------------------------------|----------|
| Failure Conditions Dialog dialog box ..... | 150      |
| Failure constraints .....                  | 150      |
| FAM .....                                  | 15       |
| File menu .....                            | 94       |
| File suffix .....                          |          |
| .lc96 .....                                | 113      |
| .lc96p .....                               | 113, 229 |
| .lc96u .....                               | 113, 229 |
| .png .....                                 | 15       |
| .rdml .....                                | 113      |
| .svg .....                                 | 16       |
| Filter calling algorithm .....             | 69       |

- Filter control bar ..... 104
- Filter Editor dialog box ..... 104
- Filter icon ..... 104
- Filter module ..... 36
- Filter set ..... 26
- Filter wheel ..... 36
- Filtering tables ..... 104
- Fixation gripper ..... 46
- Fluorescence Curves
  - Raw Data tab, application software ..... 160
  - Raw Data tab, instrument software ..... 251
- FRET ..... 15
- Fuses ..... 285
  - circuit breakers ..... 285
  - electrical fuses ..... 286
- G**
- General maintenance ..... 279
- Global action bar ..... 225
- GOI ..... 15, 72
- Gradient
  - application software ..... 139
  - instrument software ..... 249
- Gradient dialog box ..... 140
- Graph ..... 106
  - Assign Group by Line ..... 107
  - copying ..... 108
  - data visualization ..... 107
  - dye selection ..... 107
  - exporting ..... 108
  - marking an area ..... 106
  - selecting curves ..... 106
  - shortcut menu ..... 108
  - showing/hiding legend ..... 108
  - showing/hiding selection ..... 106
  - slider ..... 108
  - tooltips ..... 108
  - y-axis scaling ..... 107
  - zooming ..... 106
- H**
- Heat Lid button ..... 225
- Heat map ..... 109
  - absolute quantification ..... 170
  - combined call ..... 77
  - copying ..... 110
  - endpoint genotyping ..... 198
  - exporting ..... 110
  - qualitative detection ..... 189, 217
  - Raw Data tab ..... 252
  - relative quantification ..... 185
  - shortcut menu ..... 110
  - Tm calling ..... 204
- Help
  - browser ..... 276
  - button, instrument software ..... 225
  - menu, application software ..... 95
- HEX ..... 15
- Hide Selection icon ..... 106
- High resolution melting ..... 81, 207
  - difference plot ..... 83, 215
  - melting curves ..... 82, 212
  - minimum EPF threshold ..... 213
  - normalized melting curves ..... 82, 213
  - normalized melting peaks ..... 83, 215
  - normalization method ..... 212
  - post-melting range ..... 212
  - pre-melting range ..... 212
  - result table ..... 216
  - select gene ..... 208
  - settings ..... 208
- High Resolution Melting program ..... 137, 246
- High Resolution Melting Settings dialog box ..... 208
- Home directory ..... 58
- Housing
  - cleaning ..... 279
  - labels ..... 17
- HRM ..... 15
- HTML report ..... 118
- Hydrolysis probes ..... 66
- I**
- Import data
  - application software ..... 121
  - instrument software ..... 234
- Importing sample data into the sample list ..... 158
- Input fields
  - application software ..... 98
  - instrument software ..... 227
- Installation requirements
  - application software ..... 57
  - instrument ..... 42
- Installing
  - application software ..... 57
  - firmware update ..... 63
  - instrument ..... 42, 44
  - instrument software ..... 50
- Instrument Manager ..... 124
  - adding instrument ..... 126
  - editing instrument ..... 126
  - Online Monitoring tab ..... 130
  - registering instrument ..... 126
  - Send/Receive Experiment tab ..... 128
- Instrument serial number ..... 253
- Instrument tab ..... 253
  - Current Date ..... 255
  - Instrument Serial Number ..... 253
  - Self Test ..... 254
- Integration Time
  - application software ..... 142
  - instrument software ..... 242, 244
  - Raw Data tab ..... 161
- Intended use ..... 10
- Intercalating fluorescent dye ..... 65

|                                           |        |
|-------------------------------------------|--------|
| Interface                                 |        |
| Ethernet .....                            | 26, 31 |
| USB .....                                 | 26, 30 |
| Internal control .....                    | 188    |
| <b>L</b>                                  |        |
| LAN .....                                 | 15     |
| LED .....                                 | 15     |
| LightCycler® 480 Multiwell Plate 96 ..... | 39     |
| LightCycler® 480 Sealing Foil .....       | 39     |
| LightCycler® 8-Tube Strips .....          | 39     |
| LightCycler® 96 Application Software      |        |
| buttons .....                             | 98     |
| exiting .....                             | 123    |
| experiment bar .....                      | 97     |
| experiments .....                         | 113    |
| export data .....                         | 122    |
| graphs .....                              | 106    |
| heat maps .....                           | 109    |
| home directory .....                      | 58     |
| import data .....                         | 121    |
| input fields .....                        | 98     |
| input/output data .....                   | 121    |
| installation requirements .....           | 57     |
| installing .....                          | 57     |
| Instrument Manager .....                  | 124    |
| main window .....                         | 93     |
| menu bar .....                            | 94     |
| online monitoring .....                   | 130    |
| plate view .....                          | 111    |
| preferences .....                         | 134    |
| regional settings .....                   | 98     |
| registering an instrument .....           | 126    |
| results batch export .....                | 131    |
| sections .....                            | 112    |
| starting .....                            | 90     |
| startup wizard .....                      | 90     |
| tables .....                              | 99     |
| tool bar icons .....                      | 96     |
| tools .....                               | 124    |
| uninstalling .....                        | 59     |
| update .....                              | 60     |
| USB drive .....                           | 57     |
| working window area tabs .....            | 97     |
| LightCycler® 96 Disposables .....         | 39     |
| LightCycler® 96 Firmware update .....     | 63     |
| LightCycler® 96 Instrument .....          | 304    |
| access requirements .....                 | 43     |
| additional equipment .....                | 41     |
| assembling .....                          | 44     |
| automated backup .....                    | 263    |
| Axeda client .....                        | 265    |
| back .....                                | 31     |
| block cyler cover .....                   | 33     |
| block cyler unit .....                    | 33     |
| CCD camera .....                          | 37     |
| cleaning .....                            | 279    |
| date/time configuration .....             | 255    |
| detection channels .....                  | 38     |
| detection formats .....                   | 38     |
| detection unit .....                      | 35     |
| device name/hostname configuration ..     | 257    |
| dimensions .....                          | 43     |
| disposables .....                         | 39     |
| email configuration .....                 | 259    |
| exporting log files .....                 | 266    |
| filter module .....                       | 36     |
| fixation gripper .....                    | 46     |
| installation requirements .....           | 42     |
| installing .....                          | 42     |
| loading module .....                      | 30     |
| locking for transportation .....          | 271    |
| messages .....                            | 295    |
| multiwell plate mount .....               | 34     |
| Network Address .....                     | 258    |
| network configuration .....               | 257    |
| optic module .....                        | 35     |
| packing .....                             | 290    |
| power requirements .....                  | 43     |
| reagents .....                            | 41     |
| recalibrate touchscreen .....             | 269    |
| registering .....                         | 126    |
| remote monitoring .....                   | 262    |
| remote service .....                      | 304    |
| reset .....                               | 268    |
| self test .....                           | 254    |
| serial number .....                       | 253    |
| space and power requirements .....        | 43     |
| specifications .....                      | 25     |
| symbols .....                             | 17     |
| system backup .....                       | 267    |
| system restore .....                      | 268    |
| technical specifications .....            | 26     |
| thermal block cyler .....                 | 33     |
| touchscreen .....                         | 30     |
| transport locking device .....            | 49     |
| transportation .....                      | 287    |
| unpacking .....                           | 44     |
| ventilation .....                         | 32     |
| ventilation requirements .....            | 43     |
| warnings and precautions .....            | 18     |
| weight .....                              | 43     |

- LightCycler® 96 Instrument Software
- automatic one-to-one connection..... 50
  - buttons..... 227
  - Ethernet network connection..... 55
  - export data..... 235
  - global action bar..... 225
  - help browser..... 276
  - import data..... 234
  - input fields..... 227
  - input/output data..... 234
  - installing..... 50
  - main window..... 222
  - manual one-to-one connection..... 52, 54
  - message window area..... 226
  - network configuration..... 54
  - status bar..... 223
  - tables..... 228
  - update..... 60
  - working window area tabs..... 224
- LightCycler® 96 Reagents..... 41
- LightCycler® 96 System Package..... 28
- LightCycler® USB Handheld Scanner..... 27
- Loading module..... 30
- unlocking..... 281
- M**
- MagNA Pure 96 sample data..... 122
- Main window
- application software..... 93
  - experiment bar..... 97
  - instrument software..... 222
  - menu bar..... 94
  - tool bar..... 96
  - touchscreen..... 222
- Maintenance
- general..... 279
  - precautions..... 279
- Maximal C<sub>q</sub>
- absolute quantification..... 167, 188
  - relative quantification..... 177
- Measurement tab..... 242
- Measurement window area..... 141
- Melt Factor
- application software..... 142
  - instrument software..... 242, 244
- Melting Analysis Parameters dialog box..... 201
- Melting Curve analysis see T<sub>m</sub> calling
- Melting curves
- high resolution melting..... 82, 212
  - Raw Data tab..... 160
  - T<sub>m</sub> calling..... 79, 203
- Melting peak area..... 106
- creating..... 201
- Melting peaks..... 80
- Melting program..... 137, 246
- Melting Selection dialog box..... 164
- Menu bar..... 94
- File menu..... 94
  - Help menu..... 95
  - Options menu..... 95
  - Tools menu..... 94
  - Window menu..... 95
- Message window area..... 226
- Messages..... 272, 295
- displaying..... 272
- Minimal EPF
- absolute quantification..... 168, 188
  - relative quantification..... 178
- Minimal Slope
- absolute quantification..... 167, 188
  - relative quantification..... 178
- Minimum EPF threshold
- absolute quantification..... 169
  - high resolution melting..... 213
  - slider..... 169
- Monitoring PCR
- hydrolysis probes..... 66
  - intercalating fluorescent dye..... 65
- Mount..... 34
- Multicolor detection..... 66
- Multiwell plate image..... 145
- shortcut menu..... 145
- Multiwell plate mount..... 34
- cleaning..... 280
- N**
- Negative call..... 69
- Network Address window area..... 258
- Network configuration
- automatic one-to-one connection..... 50
  - Ethernet network connection..... 55
  - instrument..... 54
  - instrument software..... 54
  - manual one-to-one connection..... 52, 54
- Network Information window area..... 257
- New button..... 225
- New Experiment from Existing icon..... 96
- New Experiment icon..... 96
- News and Support tab..... 92
- Normalization method..... 212
- Normalized melting curves..... 82, 213
- Normalized melting peaks..... 83, 215
- Normalized ratio..... 72
- Notes tab..... 118
- NRC..... 15
- NTC..... 15

**O**

|                                         |        |
|-----------------------------------------|--------|
| One-to-one connection                   |        |
| automatic .....                         | 50     |
| manual .....                            | 52, 54 |
| Online Monitoring tab .....             | 130    |
| Open Experiment icon .....              | 96     |
| Opening                                 |        |
| experiments, application software ..... | 115    |
| experiments, instrument software .....  | 232    |
| Optic module .....                      | 35     |
| Options menu .....                      | 95     |
| Ordering information .....              | 309    |

**P**

|                                        |          |
|----------------------------------------|----------|
| Packing the instrument .....           | 290      |
| Pasting sample data .....              | 156      |
| PCR .....                              | 15       |
| PCR efficiency .....                   | 71       |
| correction .....                       | 78       |
| PDF email report .....                 | 260      |
| PE .....                               | 15       |
| Peltier elements .....                 | 33       |
| Placing transport locking device ..... | 287, 289 |
| Plate ID .....                         | 149      |
| Plate view .....                       | 111      |
| Raw Data tab .....                     | 160      |
| Sample Editor tab .....                | 144      |
| selecting/deselecting .....            | 111      |
| tooltips .....                         | 111      |
| Plate View tab .....                   | 144      |
| Clear Wells .....                      | 153      |
| multiwell plate image .....            | 145      |
| Plate ID .....                         | 149      |
| Print Plate .....                      | 148      |
| Reaction Properties .....              | 145      |
| Set to Defaults .....                  | 153      |
| Visible Details .....                  | 148      |
| PNG .....                              | 15       |
| Positive call .....                    | 69       |
| Post-melting range .....               | 212      |
| Power box .....                        | 31       |
| Power requirements .....               | 43       |
| Precautions .....                      | 18, 279  |
| Predefined Programs dialog box         |          |
| application software .....             | 136      |
| Predefined programs window area        |          |
| instrument software .....              | 246      |
| Preferences dialog box .....           | 134      |
| Preincubation program .....            | 137, 246 |
| Pre-melting range .....                | 212      |
| Print Plate Preview dialog box .....   | 148      |
| Printing, plate view .....             | 148      |
| Profile tab .....                      | 245      |
| Program settings                       |          |
| application software .....             | 135      |
| Program Settings window area .....     | 247      |
| instrument software .....              | 247      |

**Programs**

|                                    |          |
|------------------------------------|----------|
| 2 step amplification .....         | 137, 246 |
| 3 step amplification .....         | 137, 246 |
| adding, application software ..... | 136      |
| adding, instrument software .....  | 246      |
| cooling .....                      | 137, 246 |
| high resolution melting .....      | 137, 246 |
| melting .....                      | 137, 246 |
| preincubation .....                | 137, 246 |
| touchdown function .....           | 137, 246 |

**Programs list**

|                                           |     |
|-------------------------------------------|-----|
| application software .....                | 135 |
| buttons, application software .....       | 136 |
| buttons, instrument software .....        | 246 |
| instrument software .....                 | 245 |
| shortcut menu, application software ..... | 136 |

|                            |     |
|----------------------------|-----|
| Programs window area ..... | 245 |
| application software ..... | 135 |
| instrument software .....  | 245 |

**Properties**

|                   |     |
|-------------------|-----|
| experiments ..... | 117 |
|-------------------|-----|

|                       |    |
|-----------------------|----|
| Properties icon ..... | 96 |
|-----------------------|----|

**Q**

|            |    |
|------------|----|
| qPCR ..... | 15 |
|------------|----|

**Qualitative Detection**

|                                 |          |
|---------------------------------|----------|
| analysis settings .....         | 187      |
| internal control settings ..... | 187      |
| Qualitative detection .....     | 77, 186  |
| amplification curves .....      | 189, 217 |
| combined call heat map .....    | 77, 190  |
| heat map .....                  | 189, 217 |
| internal control .....          | 188      |
| result table .....              | 191      |

|                                        |     |
|----------------------------------------|-----|
| Qualitative Detection dialog box ..... | 187 |
|----------------------------------------|-----|

|                                                 |     |
|-------------------------------------------------|-----|
| Qualitative Detection Settings dialog box ..... | 187 |
|-------------------------------------------------|-----|

**Quant Factor**

|                            |          |
|----------------------------|----------|
| application software ..... | 142      |
| instrument software .....  | 242, 244 |

**Quantification analysis**

|                                |    |
|--------------------------------|----|
| absolute quantification .....  | 71 |
| Cq .....                       | 69 |
| endpoint fluorescence .....    | 70 |
| positive/negative filter ..... | 69 |
| qualitative detection .....    | 77 |
| quantification cycle .....     | 69 |
| relative quantification .....  | 72 |
| standard curve .....           | 70 |

|                            |    |
|----------------------------|----|
| Quantification cycle ..... | 69 |
|----------------------------|----|

|                      |    |
|----------------------|----|
| Quickstart tab ..... | 91 |
|----------------------|----|

**R**

- Ramp
  - application software ..... 139
  - instrument software ..... 249
- Ratio ..... 72
  - multiple reference genes ..... 75
  - single reference gene ..... 74
- Ratio Bars chart ..... 180
  - Data Visualization ..... 107, 180
  - Display Ratio ..... 181
  - Error Bars ..... 181
  - Order By ..... 181
  - Y Axis Scaling ..... 181
- Raw Data tab
  - Add 10 cycles ..... 251
  - application software ..... 159
  - choosing the display ..... 251
  - instrument software ..... 250
  - sections ..... 159
  - Temperature ..... 252
- RDML ..... 16
- Reaction properties ..... 145
  - concentration ..... 146
  - condition ..... 146
  - sample name ..... 146
- Reaction Properties window area ..... 145
- Reagents ..... 41
- RealTime ready Panels target information ..... 122
- Recalibrate touchscreen ..... 269
- Recent Experiments tab ..... 91
- Reference gene ..... 72, 177
- Regional settings ..... 98
- Registering an instrument ..... 126
- Rel Quant Settings dialog box ..... 177
- Relative quantification ..... 72, 176
  - All Data tab ..... 182
  - amplification curves ..... 179
  - analysis settings ..... 177
  - Cq bars ..... 185
  - Efficiency ..... 177
  - error calculation ..... 75
  - heat map ..... 185
  - Maximal Cq ..... 177
  - Minimal EPF ..... 178
  - Minimal Slope ..... 178
  - normalized ratio ..... 72
  - PCR efficiency correction ..... 74
  - ratio ..... 72
  - Ratio Bars ..... 180
  - Reference ..... 177
  - reference gene ..... 72
  - result table ..... 181
  - Run Calibrator ..... 178
  - run calibrator sample ..... 72
  - scaled ratio ..... 72
  - standard curves ..... 185
  - Statistic Data tab ..... 184, 216
  - Study Calibrator ..... 179
  - study calibrator condition ..... 72
- Remote monitoring icon ..... 223
- Remote Monitoring window area ..... 262
- Remote service ..... 304
- Removing
  - conditions ..... 165
  - genes ..... 165
  - positions ..... 101
  - positions from analysis ..... 123
  - samples ..... 165
  - wells ..... 153, 165
- Rename Experiment window area ..... 240
- Replicate group ..... 147
- Replicate Group window area ..... 147
- Report
  - experiments, application software ..... 118
  - self test, instrument software ..... 254
- Reports icon ..... 96
- Requirements
  - application software ..... 57
  - environment ..... 25
  - installation ..... 42
  - power ..... 43
  - space ..... 43
- Restore Instrument Data window area ..... 268
- Result Batch Export
  - analyses ..... 133
  - analysis type ..... 132
  - experiment files ..... 132
- Result Batch Export wizard ..... 131
- Result table
  - absolute quantification ..... 171
  - endpoint genotyping ..... 199
  - high resolution melting ..... 216
  - qualitative detection analysis ..... 191
  - relative quantification ..... 181
  - Tm calling ..... 205
- Run calibrator ..... 72
  - setting ..... 178
- Run Editor
  - adding programs, application software ..... 136
  - adding programs, instrument software ..... 246

- Run Editor tab  
     application software ..... 135  
     Detection Format, application software ..... 141  
     Detection Format, instrument software ..... 243  
     instrument software ..... 242  
     Measurement, application software ..... 141  
     Measurement, instrument software ..... 242  
     Programs window area, application software ..... 135  
     Programs window area, instrument software ..... 245  
     Steps window area, application software ..... 138  
     Steps window area, instrument software ..... 247  
     Temperature Profile, application software ..... 142  
     Temperature Profile, instrument software ..... 249
- S**
- Sample  
     concentration ..... 146  
     condition ..... 146  
     excluding from analysis ..... 165  
     name ..... 146  
     removing from analysis ..... 165  
     replicate group ..... 147  
     type ..... 146
- Sample data  
     copying ..... 156  
     exporting ..... 156  
     importing ..... 158  
     pasting ..... 156
- Sample Editor tab ..... 143  
     Plate View ..... 144  
     tool bar icon ..... 143
- Sample name ..... 146
- Sample table ..... 155  
     exporting ..... 156  
     importing ..... 158  
     pasting ..... 156  
     Raw Data tab ..... 161  
     Sample Editor tab ..... 155  
     shortcut menu ..... 156
- Sample type ..... 146
- Samples table  
     copying ..... 156
- Save Experiment icon ..... 96
- Saved icon ..... 223
- Saving  
     experiments, application software ..... 116  
     experiments, instrument software ..... 233
- Scaled ratio ..... 72
- Scatter plot ..... 78, 196  
     cycles selection ..... 196  
     excluding samples ..... 197  
     gene selection ..... 196  
     sliders ..... 196
- Scheduled icon ..... 223
- SD ..... 16
- Sections ..... 112  
     Analysis tab ..... 163  
     Raw Data tab ..... 159
- Select HRM Gene dialog box ..... 208
- Selecting  
     curves in a graph ..... 106  
     hiding/showing ..... 106  
     table items, application software ..... 101  
     table items, instrument software ..... 228  
     wells ..... 111
- Selection icon ..... 106
- Self Test Report window area ..... 254
- Send/Receive Experiment tab ..... 128
- Sequence-Independent Detection Assays ..... 64
- Sequence-Specific Probe Binding Assays ..... 64
- Service tab ..... 264  
     Axeda client ..... 265  
     Backup ..... 267  
     Export Log Files ..... 266  
     Lock Instrument for Transportation ..... 271  
     Recalibrate ..... 269  
     Reset ..... 268  
     Restore ..... 268
- Settings  
     absolute quantification ..... 167  
     endpoint genotyping ..... 194  
     high resolution melting ..... 208  
     qualitative detection ..... 187  
     relative quantification ..... 177  
     T<sub>m</sub> calling ..... 201
- Shortcut menu  
     graphs ..... 108  
     heat maps ..... 110  
     table header ..... 99  
     tables ..... 101
- Show Selection icon ..... 106
- Show Startup Wizard icon ..... 96
- Show/Hide Legend ..... 108
- Slider ..... 108
- Slope ..... 71
- SMTP Settings ..... 261
- SNP ..... 16
- Software Update window area ..... 61
- Software version ..... 253
- Sorting  
     tables, application software ..... 102  
     tables, instrument software ..... 228
- Space requirements ..... 43

|                                             |          |                                                |          |
|---------------------------------------------|----------|------------------------------------------------|----------|
| Specifications                              |          | System Package .....                           | 28       |
| detection unit.....                         | 26       |                                                |          |
| external handheld barcode scanner.....      | 27       |                                                |          |
| instrument .....                            | 25       |                                                |          |
| technical.....                              | 26       |                                                |          |
| thermal block cycler .....                  | 27       |                                                |          |
| ssDNA .....                                 | 81       |                                                |          |
| Standard curve .....                        | 70       |                                                |          |
| absolute quantification.....                | 174      |                                                |          |
| Correlation Coefficient .....               | 71       |                                                |          |
| creating .....                              | 151      |                                                |          |
| PCR efficiency.....                         | 71       |                                                |          |
| relative quantification .....               | 185      |                                                |          |
| slope.....                                  | 71       |                                                |          |
| Standard Error of Estimate .....            | 71       |                                                |          |
| Y-Intercept.....                            | 71       |                                                |          |
| Standard Error of Estimate.....             | 71       |                                                |          |
| Start button .....                          | 225      |                                                |          |
| Starting                                    |          |                                                |          |
| application software .....                  | 90       |                                                |          |
| instrument .....                            | 48       |                                                |          |
| Startup wizard .....                        | 90       |                                                |          |
| News and Support tab.....                   | 92       |                                                |          |
| Quickstart tab .....                        | 91       |                                                |          |
| Recent Experiments tab .....                | 91       |                                                |          |
| Statistic Data tab                          |          |                                                |          |
| absolute quantification.....                | 173      |                                                |          |
| relative quantification .....               | 184, 216 |                                                |          |
| Status bar .....                            | 223      |                                                |          |
| Step Settings window area .....             | 248      |                                                |          |
| Steps                                       |          |                                                |          |
| Acquisition Mode, application software..... | 139      |                                                |          |
| Acquisition Mode, instrument software.....  | 249      |                                                |          |
| Duration, application software .....        | 139      |                                                |          |
| Duration, instrument software.....          | 249      |                                                |          |
| Gradient, instrument software .....         | 249      |                                                |          |
| Ramp, application software.....             | 139      |                                                |          |
| Ramp, instrument software.....              | 249      |                                                |          |
| settings, application software .....        | 139      |                                                |          |
| settings, instrument software .....         | 248      |                                                |          |
| Target, application software .....          | 139      |                                                |          |
| Target, instrument software .....           | 249      |                                                |          |
| Touchdown, instrument software .....        | 249      |                                                |          |
| Steps list                                  |          |                                                |          |
| application software .....                  | 138      |                                                |          |
| buttons, application software .....         | 138      |                                                |          |
| buttons, instrument software .....          | 248      |                                                |          |
| instrument software .....                   | 247      |                                                |          |
| shortcut menu, application software.....    | 138      |                                                |          |
| Steps window area                           |          |                                                |          |
| application software .....                  | 138      |                                                |          |
| instrument software .....                   | 247      |                                                |          |
| Study calibrator .....                      | 72       |                                                |          |
| setting .....                               | 179      |                                                |          |
| Summary tab .....                           | 117      |                                                |          |
| SVG .....                                   | 16       |                                                |          |
| SYBR .....                                  | 16       |                                                |          |
|                                             |          | Table .....                                    | 101      |
|                                             |          | Add Position .....                             | 101      |
|                                             |          | application software .....                     | 99       |
|                                             |          | Best Fit .....                                 | 100      |
|                                             |          | Clear Sorting .....                            | 100      |
|                                             |          | Color .....                                    | 101      |
|                                             |          | Column Selector .....                          | 100, 103 |
|                                             |          | column width.....                              | 102      |
|                                             |          | Copy .....                                     | 101      |
|                                             |          | editing cells .....                            | 102      |
|                                             |          | Exclude .....                                  | 101      |
|                                             |          | Export to File .....                           | 101      |
|                                             |          | filter control bar .....                       | 104      |
|                                             |          | Filter Editor.....                             | 100, 104 |
|                                             |          | filter icon.....                               | 104      |
|                                             |          | filtering .....                                | 104      |
|                                             |          | Group By This Column .....                     | 100      |
|                                             |          | Hide/Show This Column .....                    | 100      |
|                                             |          | hiding columns .....                           | 103      |
|                                             |          | Include .....                                  | 101      |
|                                             |          | instrument software .....                      | 228      |
|                                             |          | Remove Position .....                          | 101      |
|                                             |          | Reset Color .....                              | 101      |
|                                             |          | selecting/deselecting, application software .. | 101      |
|                                             |          | selecting/deselecting, instrument software ..  | 228      |
|                                             |          | Show Group By Box.....                         | 100      |
|                                             |          | showing columns .....                          | 103      |
|                                             |          | Sort Ascending/Descending .....                | 100      |
|                                             |          | sorting, application software .....            | 102      |
|                                             |          | sorting, instrument software .....             | 228      |
|                                             |          | table header shortcut menu .....               | 99       |
|                                             |          | table shortcut menu .....                      | 101      |
|                                             |          | Table View tab .....                           | 154      |
|                                             |          | sample table .....                             | 155      |
|                                             |          | Target temperature                             |          |
|                                             |          | application software .....                     | 139      |
|                                             |          | instrument software .....                      | 249      |
|                                             |          | TCP/IP .....                                   | 16, 55   |
|                                             |          | Temperature Profile                            |          |
|                                             |          | application software .....                     | 142      |
|                                             |          | instrument software .....                      | 249      |
|                                             |          | Temperature tab.....                           | 252      |
|                                             |          | Template                                       |          |
|                                             |          | existing experiment, application software ..   | 114      |
|                                             |          | existing experiment, instrument software ..    | 231      |
|                                             |          | Roche template, application software ..        | 114      |
|                                             |          | Roche template, instrument software ..         | 232      |
|                                             |          | Thermal block cycler .....                     | 33       |
|                                             |          | cleaning.....                                  | 280      |
|                                             |          | cover .....                                    | 33       |
|                                             |          | specifications.....                            | 27       |
|                                             |          | Thresholds, slider.....                        | 108      |

|                                 |          |                                           |     |
|---------------------------------|----------|-------------------------------------------|-----|
| Tm.....                         | 16       | <b>V</b>                                  |     |
| Tm calling .....                | 79, 200  | Ventilation .....                         | 32  |
| amplification curves .....      | 206      | requirements .....                        | 43  |
| heat map .....                  | 204      | Ventilation dust filter, exchanging ..... | 283 |
| melting curves .....            | 79, 203  | VIC.....                                  | 16  |
| melting peak areas .....        | 201      | View selection list                       |     |
| melting peaks .....             | 80       | Analysis tab .....                        | 163 |
| result table .....              | 205      | Raw Data tab .....                        | 159 |
| selecting melting program ..... | 164      | Visible Details dialog box .....          | 148 |
| settings .....                  | 201      |                                           |     |
| Tool bar.....                   | 96       | <b>W</b>                                  |     |
| Analysis tab .....              | 163      | Weight of the instrument .....            | 43  |
| Sample Editor tab.....          | 143      | Wells                                     |     |
| Tools .....                     | 124      | cleaning.....                             | 280 |
| Tools menu .....                | 94       | selecting/deselecting.....                | 111 |
| Tooltips                        |          | tooltips .....                            | 111 |
| experiment bar .....            | 97       | Window menu .....                         | 95  |
| graphs.....                     | 108      | Working window area tabs                  |     |
| heat maps .....                 | 109      | application software .....                | 97  |
| plate view .....                | 111      | instrument software .....                 | 224 |
| Touchdown program .....         | 137, 246 |                                           |     |
| Touchscreen .....               | 30       | <b>Y</b>                                  |     |
| cleaning .....                  | 280      | Y Axis Scaling icon .....                 | 107 |
| Transferring experiments .....  | 128      | Y-Intercept .....                         | 71  |
| Transport locking device .....  | 49       | <b>Z</b>                                  |     |
| failure state .....             | 289      | Zoom icon .....                           | 106 |
| normal state .....              | 287      | Zooming graphs .....                      | 106 |
|                                 |          |                                           |     |
| <b>U</b>                        |          |                                           |     |
| Unconfirmed Alarms tab.....     | 273      |                                           |     |
| Undo icon .....                 | 96       |                                           |     |
| Uninstalling                    |          |                                           |     |
| application software .....      | 59       |                                           |     |
| instrument software .....       | 60       |                                           |     |
| Unlocking                       |          |                                           |     |
| instrument .....                | 46       |                                           |     |
| loading module .....            | 281      |                                           |     |
| Unpacking the instrument .....  | 44       |                                           |     |
| Update                          |          |                                           |     |
| application software .....      | 60       |                                           |     |
| compatibility .....             | 62       |                                           |     |
| experiment files .....          | 62, 63   |                                           |     |
| firmware.....                   | 63       |                                           |     |
| instrument software .....       | 60       |                                           |     |
| UPS .....                       | 16       |                                           |     |
| USB .....                       | 16       |                                           |     |
| USB drive .....                 | 57       |                                           |     |
| USB drive icon .....            | 223      |                                           |     |
| USB interfaces .....            | 26, 30   |                                           |     |
| Utilities tab .....             | 253      |                                           |     |
| Configuration.....              | 256      |                                           |     |
| Instrument .....                | 253      |                                           |     |
| Service .....                   | 264      |                                           |     |



**Published by**

Roche Diagnostics GmbH  
Sandhofer Straße 116  
68305 Mannheim  
Germany

© 2012 Roche Diagnostics.  
All rights reserved.

[www.roche-applied-science.com](http://www.roche-applied-science.com)

② 0513
