# Supplementary material for: The deubiquitination enzyme USP14 regulates the tumourigenesis of gastric cancer by regulating c-MYC nuclear translocation through deubiquitination KPNA2
Source: Research Square preprint supplement (doi:10.21203/rs.3.rs-6295746/v1), 2025-05-07
Supplement: Supplementary file 2 [file KPNA2θϸεmRNA.xlsx]

## Sheet: Sheet1
			Position	Sample Name	Gene Name	Condition Name	Cq	Cq Mean	Cq Error
			A2	GES-1	GAPDH		28.41	28.22	0.51
			A3	GES-1	GAPDH		28.65	28.22	0.51
			A4	GES-1	GAPDH		28.33	28.22	0.51
			A6	GES-1	KPNA2		26.25	26.25	0.17
			A7	GES-1	KPNA2		26.38	26.25	0.17
			A8	GES-1	KPNA2		26.36	26.25	0.17		ges-1	MKN	SGC	HGC
			B1	MKN-45	GAPDH		28.98	29.14	0.17		0.946807	2.9019	2.2774	1.4667
			B2	MKN-45	GAPDH		29.17	29.14	0.17
			B4	MKN-45	GAPDH		29.04	29.14	0.17
			B5	MKN-45	KPNA2		25.27	25.37	0.12
			B6	MKN-45	KPNA2		25.34	25.37	0.12		25.27
			B7	MKN-45	KPNA2		25.54	25.37	0.12		25.34
			B8	MKN-45	KPNA2		25.33	25.37	0.12		25.33
			C1	SGC-7901	GAPDH		27.02	27.03	0.11
			C2	SGC-7901	GAPDH		27.19	27.03	0.11		27.02
			C3	SGC-7901	GAPDH		26.98	27.03	0.11		26.98
			C4	SGC-7901	GAPDH		26.94	27.03	0.11		26.94
			C5	SGC-7901	KPNA2		23.52	23.65	0.15
			C6	SGC-7901	KPNA2		23.63	23.65	0.15
			C7	SGC-7901	KPNA2		23.59	23.65	0.15
			C8	SGC-7901	KPNA2		23.87	23.65	0.15
			D1	HGC-27	GAPDH		23.16	23.18	0.09		23.16
			D2	HGC-27	GAPDH		23.23	23.18	0.09		23.23	23.06	23.25
			D3	HGC-27	GAPDH		23.25	23.18	0.09		23.06	23.06	23.25
			D4	HGC-27	GAPDH		23.06	23.18	0.09			23.06	23.25
			D5	HGC-27	KPNA2		20.38	20.58	0.37
			D6	HGC-27	KPNA2		20.48	20.58	0.37
			D7	HGC-27	KPNA2		20.49	20.58	0.37
Color	Position	Sample Name	Gene Name	Condition Name	Cq	Cq Mean	Cq Error	Excluded	Sample Type	Sample Type RQ	Gene Type	Condition Type	Replicate Group	Ratio	Ratio Error	Normalized Ratio	Normalized Ratio Error	Scaled Ratio	Scaled Ratio Error	Dye	Edited Call	Failure	Slope	EPF	Notes	Sample Prep Notes	Number
255;132;197;238	D8	HGC-27	KPNA2		22.31	21.77	0.37	Unchecked	Unknown	Unknown	Reference	Unknown	D5	-	-	-	-	-	-	SYBR Green I		None	0.63	2.76			44
					22.31
					22.31
