# Supplementary material for: The deubiquitination enzyme USP14 regulates the tumourigenesis of gastric cancer by regulating c-MYC nuclear translocation through deubiquitination KPNA2
Source: Research Square preprint supplement (doi:10.21203/rs.3.rs-6295746/v1), 2025-05-07
Supplement: Supplementary file 3 [file shUSP14 KPNA2.xlsx]

## Sheet: Sheet1
					Sample Name	Gene Name	Condition Name	Cq	Cq Mean	Cq Error
					HGC	GAPDH		34.02	34.02	0.07
					HGC	GAPDH		33.97	34.02	0.07
					HGC	GAPDH		34.07	34.02	0.07
					HU2	GAPDH		32.29	32.47	0.1
					HU2	GAPDH		32.56	32.47	0.1
					HU2	GAPDH		32.58	32.47	0.1
					HGC	U14		30.6	30.81	0.19
					HGC	U14		30.97	30.81	0.19
					HGC	U14		30.86	30.81	0.19
					HU2	U14		34.37	34.61	0.21
					HU2	U14		34.73	34.61	0.21
					HU2	U14		34.73	34.61	0.21
					HGC	KPNA2		26.87	26.87	0.03
					HGC	KPNA2		26.89	26.87	0.03
					HGC	KPNA2		26.84	26.87	0.03
					HU2	KPNA2		25.01	25.2	0.17
					HU2	KPNA2		25.3	25.2	0.17
					HU2	KPNA2		25.31	25.2	0.17
					SGC	GAPDH		29.4	29.4	0.12
					SGC	GAPDH		29.29	29.4	0.12
					SGC	GAPDH		29.52	29.4	0.12
					SU1	GAPDH		31.8	31.75	0.11
					SU1	GAPDH		31.83	31.75	0.11
					SU1	GAPDH		31.63	31.75	0.11
					SGC	U14		28.69	28.63	0.12
					SGC	U14		28.7	28.63	0.12
					SGC	U14		28.49	28.63	0.12
					SU1	U14		33.89	33.68	0.23
					SU1	U14		33.44	33.68	0.23
					SU1	U14		33.7	33.68	0.23
					SGC	KPNA2		24.71	24.69	0.02
					SGC	KPNA2		24.67	24.69	0.02
					SGC	KPNA2		24.7	24.69	0.02
					SU1	KPNA2		26.91	26.79	0.06
					SU1	KPNA2		26.84	26.79	0.06
					SU1	KPNA2		26.93	26.79	0.06
