# Supplementary material for: The deubiquitination enzyme USP14 regulates the tumourigenesis of gastric cancer by regulating c-MYC nuclear translocation through deubiquitination KPNA2
Source: Research Square preprint supplement (doi:10.21203/rs.3.rs-6295746/v1), 2025-05-07
Supplement: Supplementary file 4 [file USP14õЧ.xlsx]

## Sheet: Sheet1
Sample Name	Gene Name	Cq	Cq Mean	Cq Error
HGC	GAPDH	14.66	14.65	0.25
HGC	GAPDH	14.89	14.65	0.25
HGC	GAPDH	14.39	14.65	0.25
HU1	GAPDH	13.81	13.97	0.14
HU1	GAPDH	14.05	13.97	0.14
HU1	GAPDH	14.05	13.97	0.14
HU2	GAPDH	14.21	14.2	0.01
HU2	GAPDH	14.19	14.2	0.01
HU2	GAPDH	14.2	14.2	0.01
HGC	USP14	21.74	21.79	0.1
HGC	USP14	21.91	21.79	0.1
HGC	USP14	21.72	21.79	0.1
HU1	USP14	21.97	21.9	0.13
HU1	USP14	22.1	21.9	0.13
HU1	USP14	22.02	21.9	0.13
HU2	USP14	23.07	22	0.12
HU2	USP14	22.86	22	0.12
HU2	USP14	23.07	22	0.12
SGC	GAPDH	15.62	15.58	0.04
SGC	GAPDH	15.54	15.58	0.04
SGC	GAPDH	15.59	15.58	0.04
SU1	GAPDH	15.4	15.44	0.05
SU1	GAPDH	15.5	15.44	0.05
SU1	GAPDH	15.42	15.44	0.05
SU2	GAPDH	13.11	13.17	0.1
SU2	GAPDH	13.12	13.17	0.1
SU2	GAPDH	13.28	13.17	0.1
SGC	USP14	21.7	21.81	0.11
SGC	USP14	21.81	21.81	0.11
SGC	USP14	21.91	21.81	0.11
SU1	USP14	23.79	23.79	0.03
SU1	USP14	23.82	23.79	0.03
SU1	USP14	23.76	23.79	0.03
SU2	USP14	22.4	22.35	0.05
SU2	USP14	22.34	22.35	0.05
SU2	USP14	22.31	22.35	0.05
