# Supplementary material for: The deubiquitination enzyme USP14 regulates the tumourigenesis of gastric cancer by regulating c-MYC nuclear translocation through deubiquitination KPNA2
Source: Research Square preprint supplement (doi:10.21203/rs.3.rs-6295746/v1), 2025-05-07
Supplement: Supplementary file 5 [file usp14 mRNA.BDP.Gastric.xlsx]

## Sheet: Sheet1
	Sample Name	Gene Name	Cq	Cq Mean	Cq Error
	GES-1	GAPDH	23.49	23.15	0.35
	GES-1	GAPDH	23.4	23.15	0.35
	GES-1	GAPDH	23.5	23.15	0.35
	GES-1	USP14	34.69	34.71	0.17
	GES-1	USP14	34.64	34.71	0.17
	GES-1	USP14	34.6	34.71	0.17
	HGC	GAPDH	24.01	23.84	0.31
	HGC	GAPDH	24.02	23.84	0.31
	HGC	GAPDH	24.26	23.84	0.31
	HGC	USP14	32.06	32.28	0.24
	HGC	USP14	32.11	32.28	0.24
	HGC	USP14	32.15	32.28	0.24
	BGC	GAPDH	25.45	25.4	0.43
	BGC	GAPDH	25.6	25.4	0.43
	BGC	GAPDH	25.36	25.4	0.43
	BGC	USP14	34.85	33.65	0.12
	BGC	USP14	34.99	33.65	0.12
	BGC	USP14	35.01	33.65	0.12
	MKN	GAPDH	20.05	20.07	0.16
	MKN	GAPDH	19.97	20.07	0.16
	MKN	GAPDH	20.08	20.07	0.16
	MKN	USP14	32.38	35.49	0.16
	MKN	USP14	32.73	35.49	0.16
	MKN	USP14	32.62	35.49	0.16
	MGC	GAPDH	23.5	23.3	0.19
	MGC	GAPDH	23.43	23.3	0.19
	MGC	GAPDH	23.46	23.3	0.19
	MGC	USP14	33.64	34.38	0.48
	MGC	USP14	33.39	34.38	0.48
	MGC	USP14	33.41	34.38	0.48
	SGC	GAPDH	21.98	21.99	0.19
	SGC	GAPDH	21.81	21.99	0.19
	SGC	GAPDH	22.02	21.99	0.19
	SGC	USP14	31.1	31.52	0.22
	SGC	USP14	31.16	31.52	0.22
	SGC	USP14	30.91	31.52	0.22
