# Supplementary material for: The deubiquitination enzyme USP14 regulates the tumourigenesis of gastric cancer by regulating c-MYC nuclear translocation through deubiquitination KPNA2
Source: Research Square preprint supplement (doi:10.21203/rs.3.rs-6295746/v1), 2025-05-07
Supplement: Supplementary file 6 [file 1⁄2 Microsoft Excel .xlsx]

## Sheet: Sheet1
	Sample Name	Gene Name	Cq	Cq Mean	Cq Error
	HGC-shUSP14/USP14	GAPDH	18.39	18.2	0.29		H
	HGC-shUSP14/USP14	GAPDH	18.38	18.2	0.29
	HGC-shUSP14/USP14	GAPDH	18.25	18.2	0.29
	HGC-shUSP14/GFP	GAPDH	17.21	17.25	0.18
	HGC-shUSP14/GFP	GAPDH	17.13	17.25	0.18
	HGC-shUSP14/GFP	GAPDH	17.14	17.25	0.18
	HGC-shUSP14/USP14	USP14	24.33	24.24	0.14
	HGC-shUSP14/USP14	USP14	24.28	24.24	0.14
	HGC-shUSP14/USP14	USP14	24.33	24.24	0.14
	HGC-shUSP14/GFP	USP14	25.4	26.41	0.01
	HGC-shUSP14/GFP	USP14	25.42	26.41	0.01
	HGC-shUSP14/GFP	USP14	25.41	26.41	0.01
	SGC-shUSP14/USP14	GAPDH	14.92	14.89	0.09
	SGC-shUSP14/USP14	GAPDH	14.79	14.89	0.09
	SGC-shUSP14/USP14	GAPDH	14.97	14.89	0.09
	SGC-shUSP14/GFP	GAPDH	14.76	14.94	0.16
	SGC-shUSP14/GFP	GAPDH	15.08	14.94	0.16
	SGC-shUSP14/GFP	GAPDH	14.97	14.94	0.16
	SGC-shUSP14/USP14	USP14	22.32	22.34	0.02
	SGC-shUSP14/USP14	USP14	22.35	22.34	0.02
	SGC-shUSP14/USP14	USP14	22.35	22.34	0.02
	SGC-shUSP14/GFP	USP14	23.89	22.98	0.09
	SGC-shUSP14/GFP	USP14	23.97	22.98	0.09
	SGC-shUSP14/GFP	USP14	23.98	22.98	0.09
